# Supplementary material
Source: PubMed Central journal article supplement (PMC3888361)

## **Full genome chromatin immunoprecipitation (ChIP-chip) mapping of Czf1 binding sites in opaque cells.**

Plots of 15kb regions centered on the set of 90 Czf1 binding sites in opaque cells.

Smoothed enrichment data for the wild type strain is shown in green, for the *czf1*

deletion strain in grey. The 500bp called peaks of Czf1 enrichment are indicated by the green boxes in the lower track in each image. Peaks are arranged in order of

decreasing Czf1 enrichment. Enrichment ( $\log_2$ ) is indicated on the y-axis. Chromosomal

locations and specific enrichment levels for the peak are indicated in the strip above

each panel; when multiple peaks are present the enrichment value corresponds to the

peak at the center of the plot. Yellow boxes correspond to genes; 5' or 3' untranslated

regions are included as lighter shaded portions of the box. Genes plotted above the

bold line read in the sense direction; genes plotted below the line read in the antisense

direction. Plots produced using the SnapShot Function in MochiView v1.46 (Homann

and Johnson, 2010).

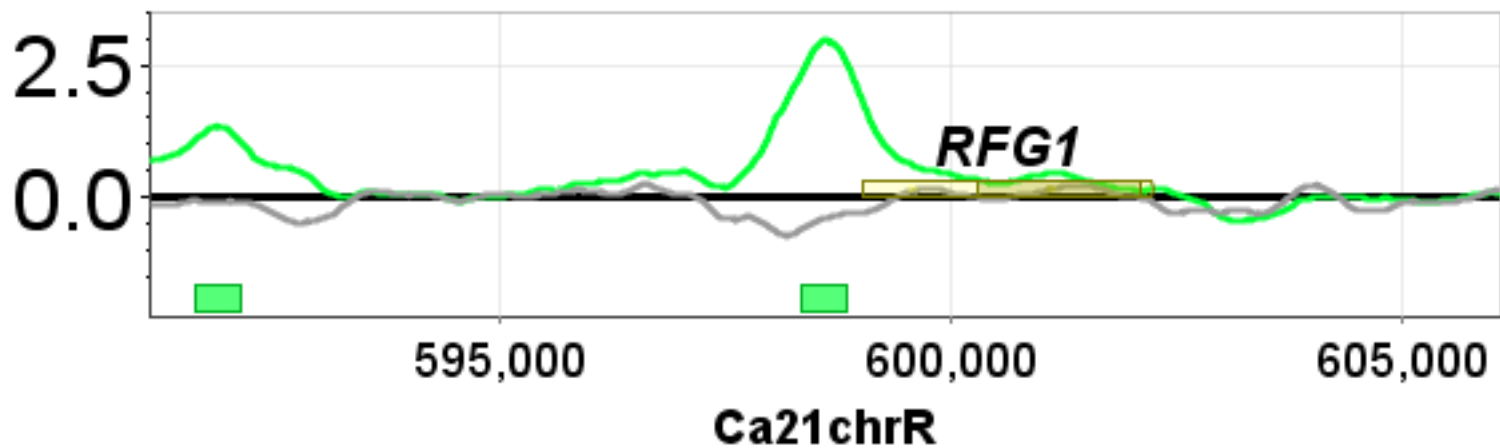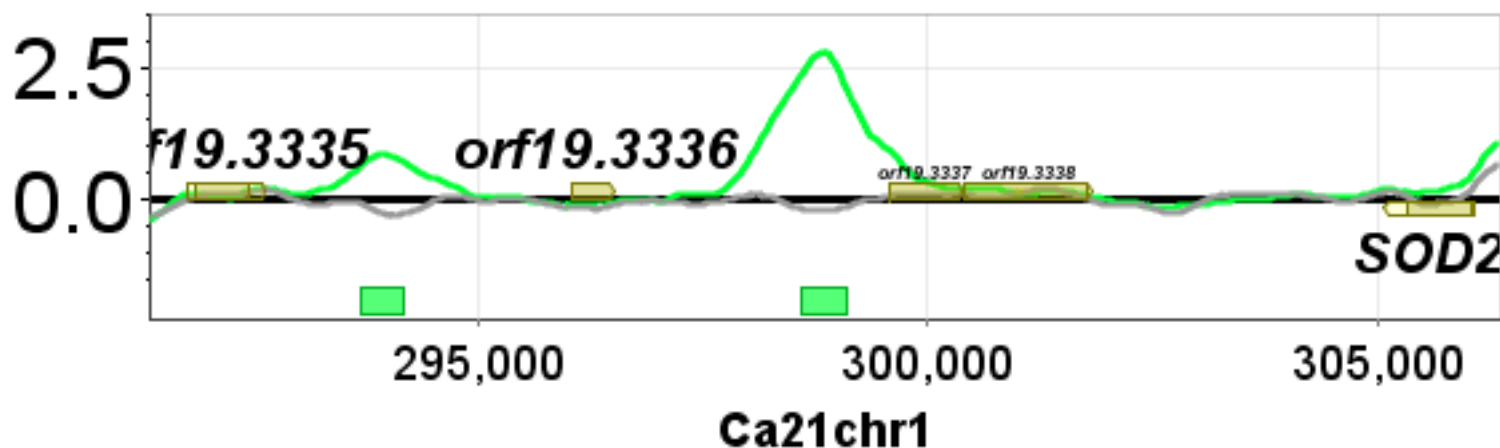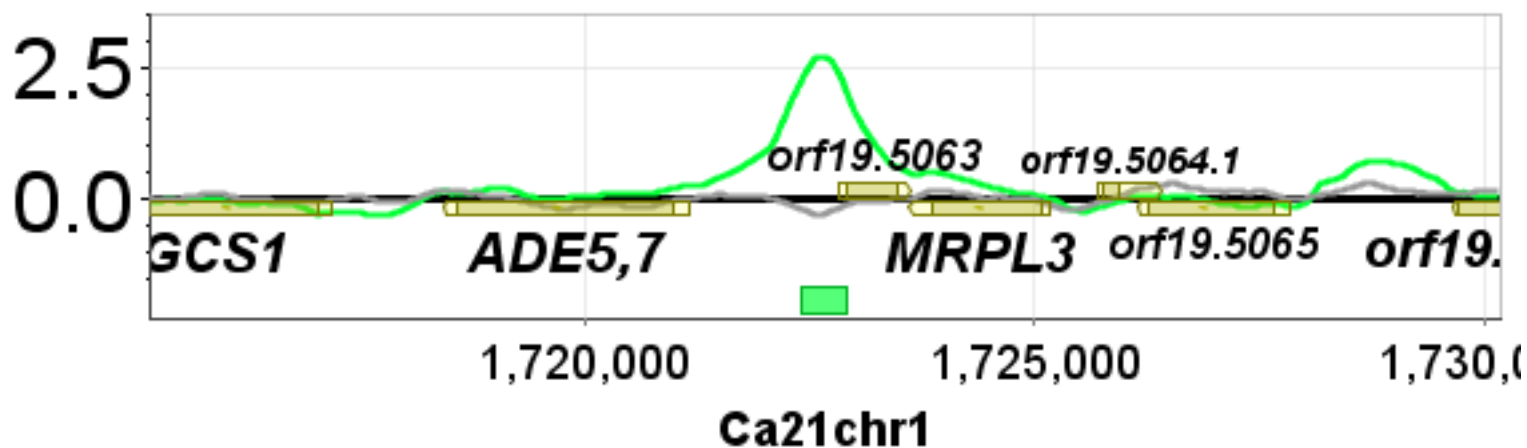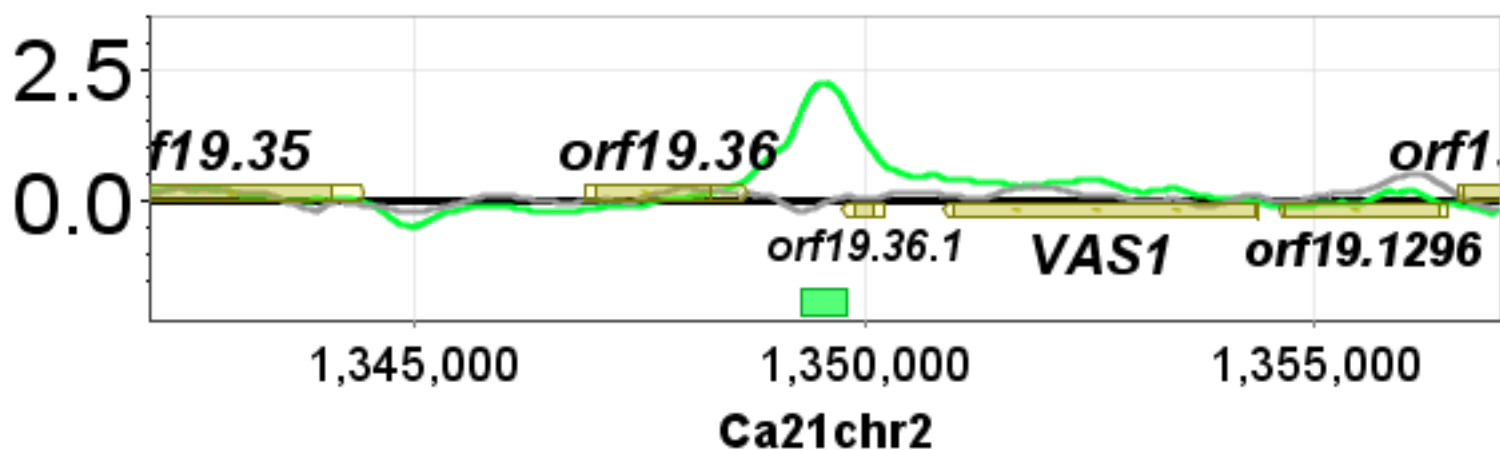

[2.164] Ca21chrR:1490685-1505684 [+] [orf19.2366, orf19.2367, orf19.2368, orf19.2369, POL2]

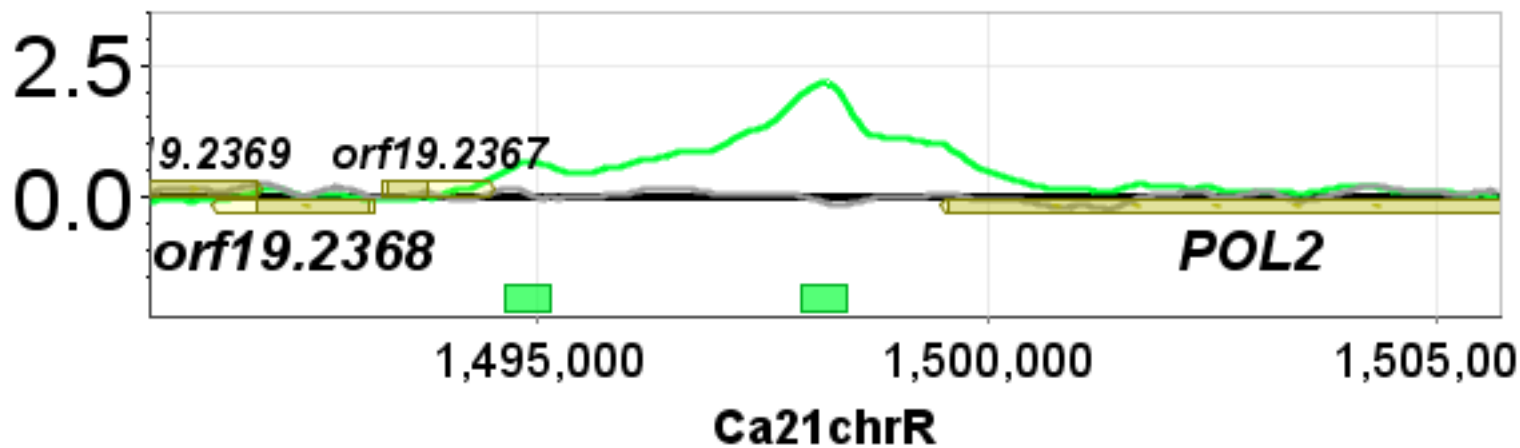

[2.079] Ca21chrR:1403420-1418419 [+] [RGS2, ntar\_1310, ntar\_1311, ntar\_1312, orf19.693]

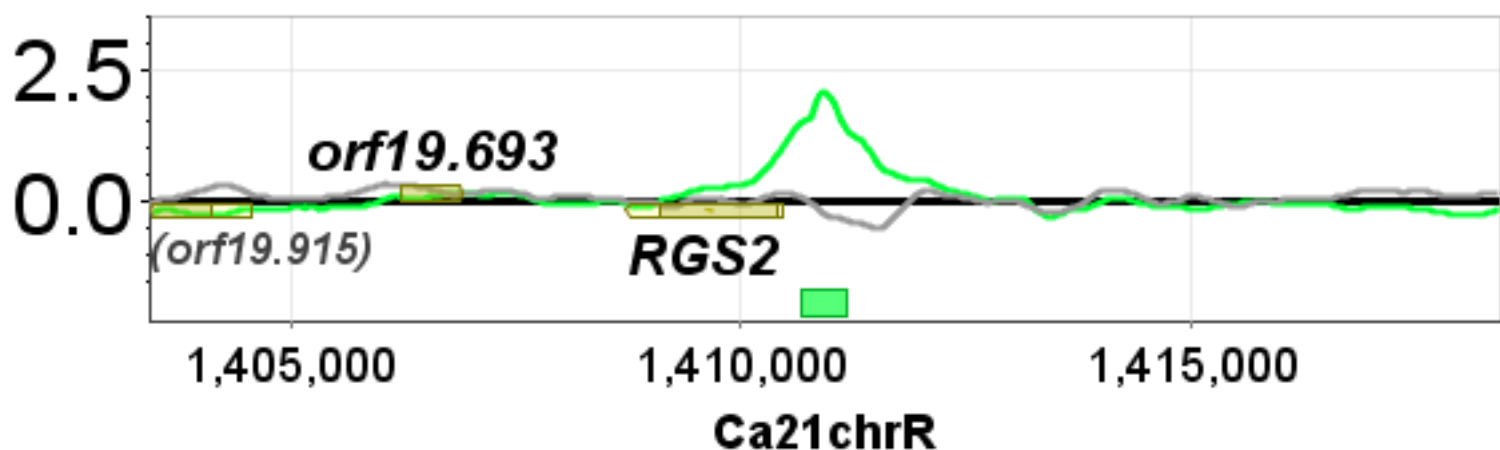

[2.035] Ca21chr1:3157288-3172287 [+] [orf19.7252, WSC4, orf19.7250, orf19.7254, RPC10]

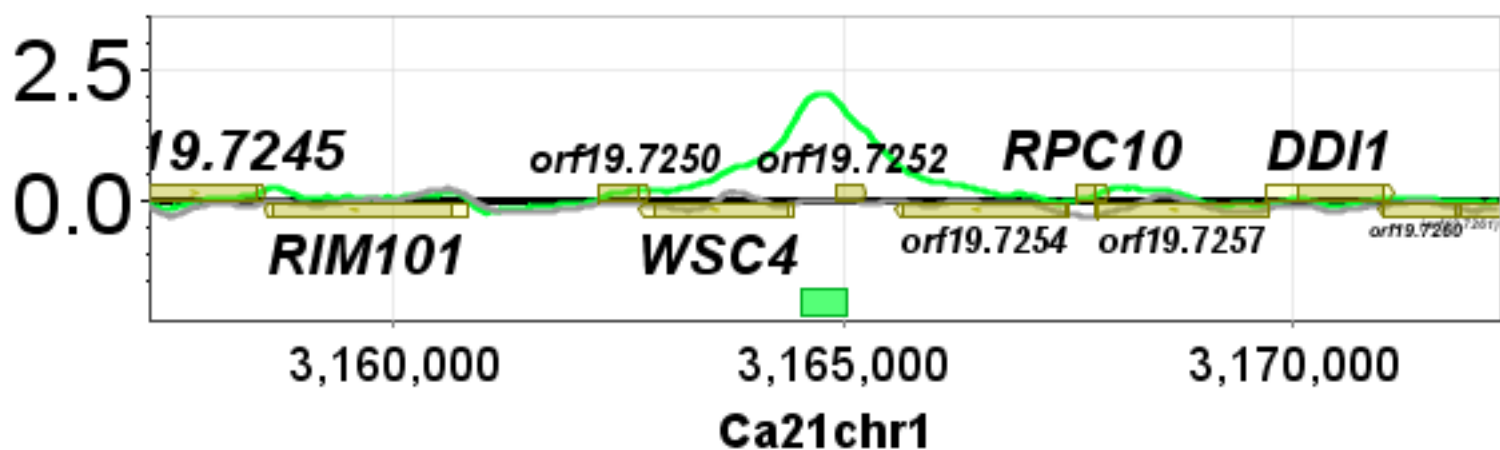

[1.938] Ca21chrR:1307833-1322832 [+] [orf19.3868, orf19.3869, ntar\_1302, ntar\_1301, ADE13]

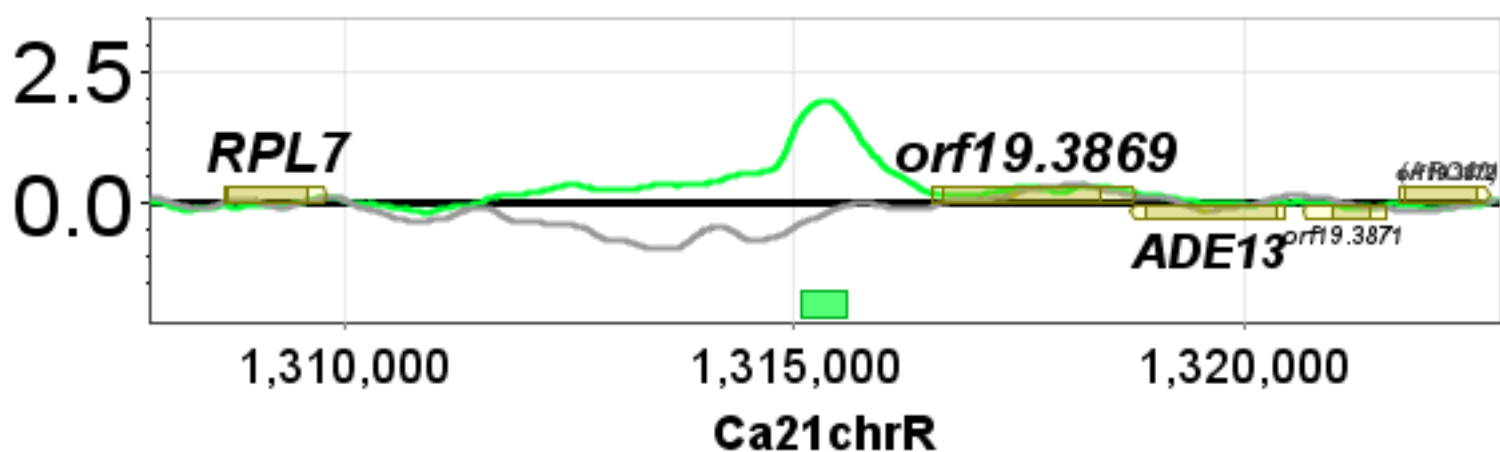

[1.906] Ca21chr3:1751748-1766747 [+] [orf19.6715, ntar\_688, orf19.6713, ABD1, orf19.6712]

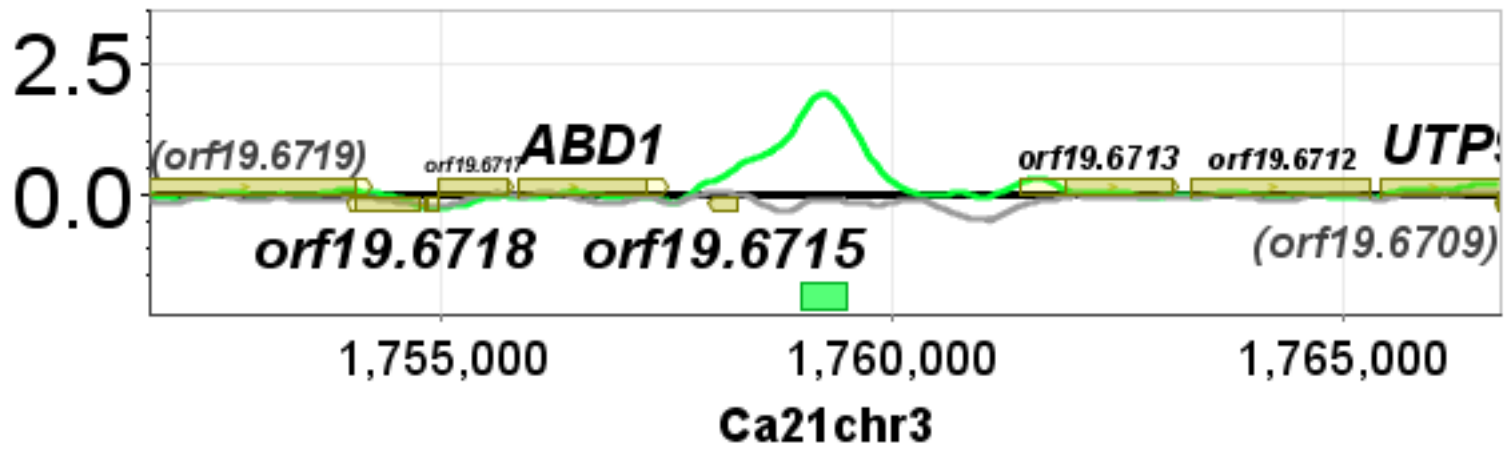

[1.784] Ca21chrR:2161887-2176886 [+] [ntar\_1405, FAA4, ntar\_1406, orf19.7590, ntar\_1404]

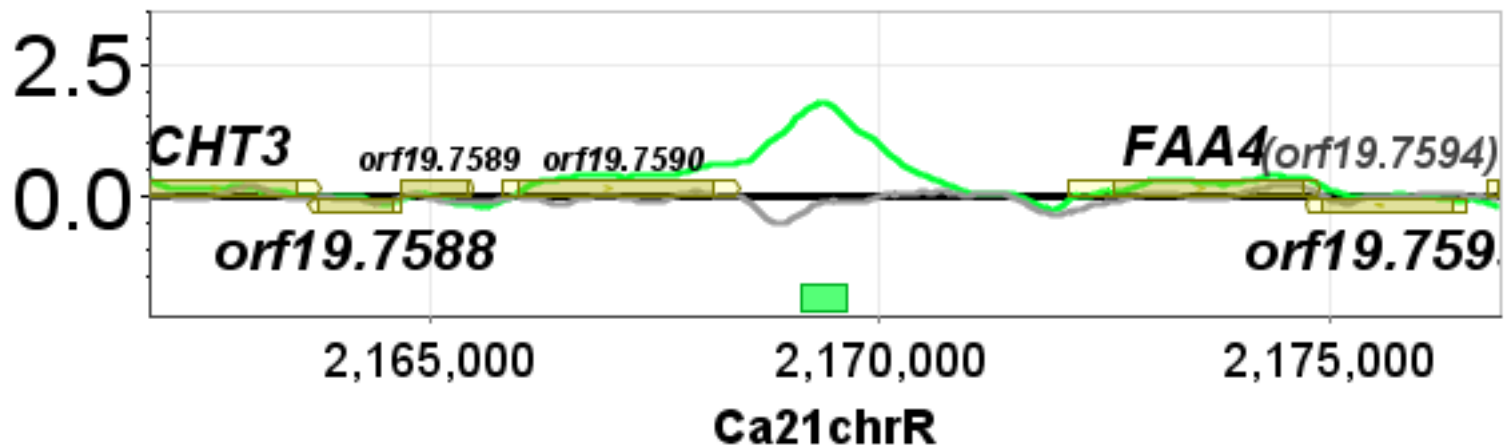

[1.764] Ca21chrR:867494-882493 [+] [orf19.467, IFF9]

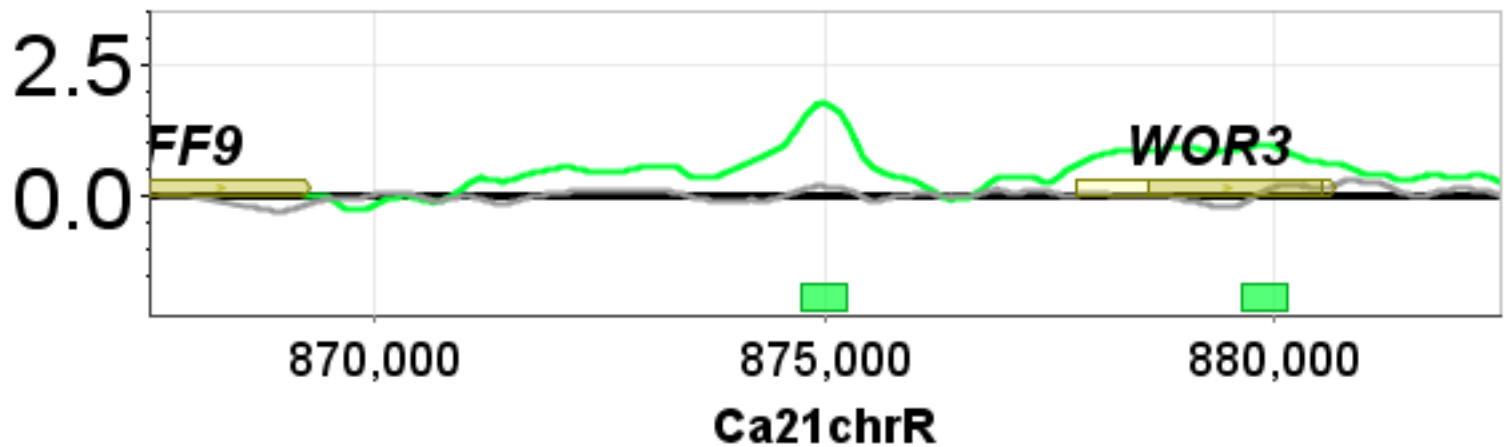

[1.763] Ca21chr4:1515673-1530672 [+] [CZF1, orf19.3128, CCT6, orf19.3125, orf19.3129]

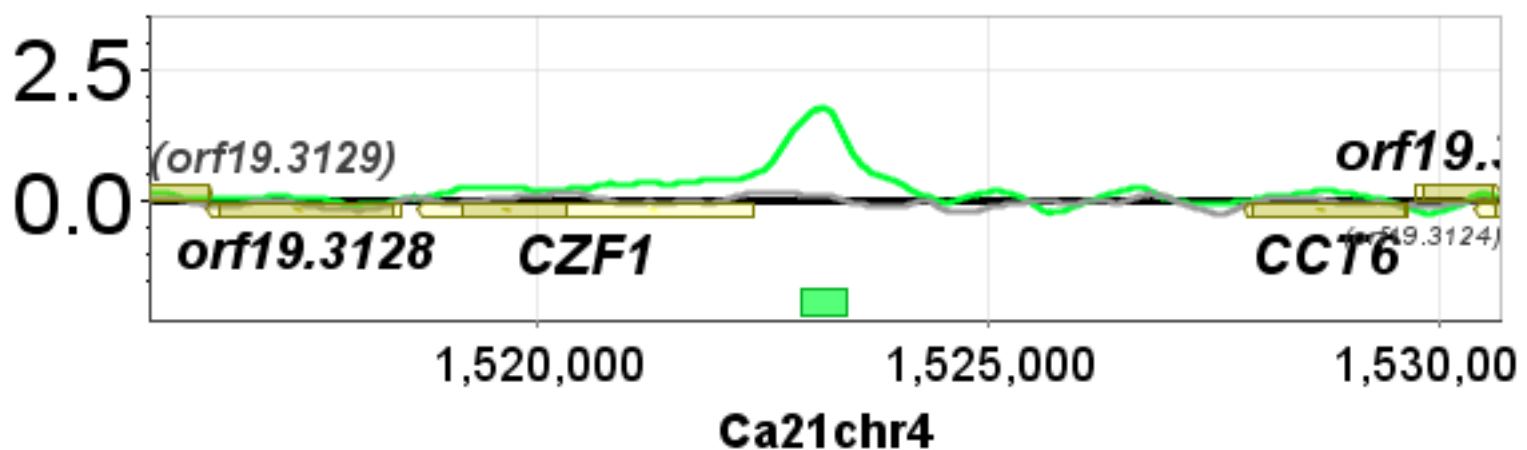

[1.642] Ca21chr2:939209-954208 [+] [RIM2, orf19.4498, MED8, orf19.4496, ntar\_372]

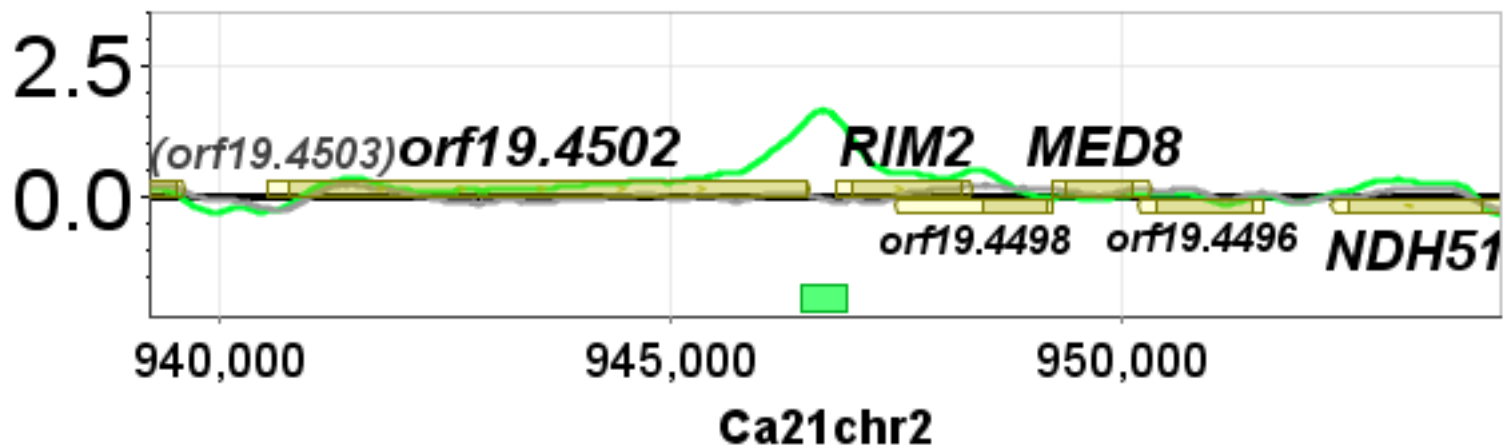

[1.619] Ca21chr4:208928-223927 [+] [HGT17, RAT1, ntar\_727, orf19.4680, MLP1]

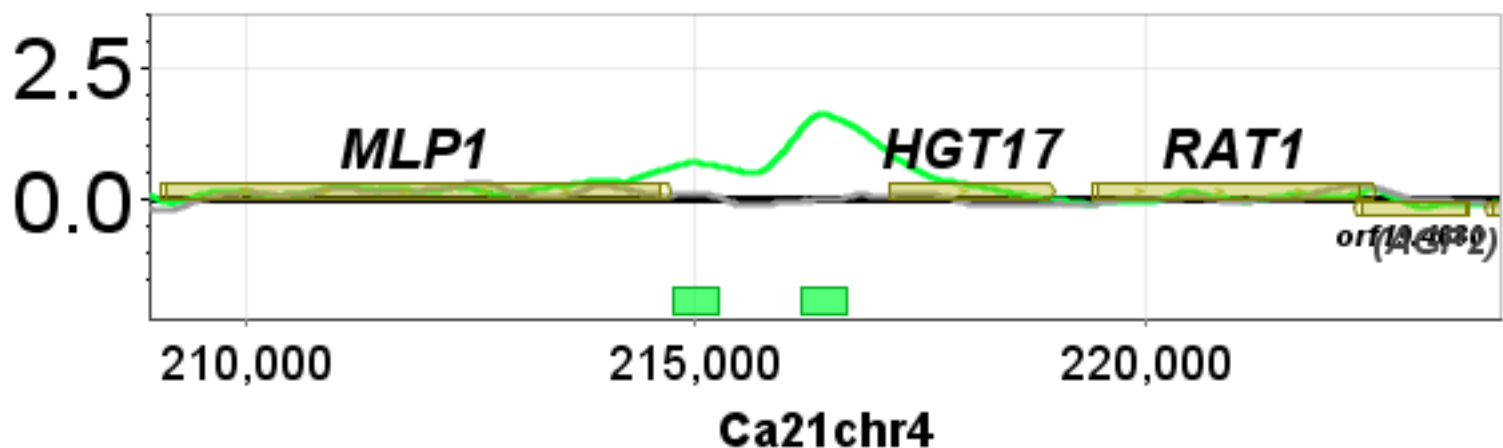

[1.599] Ca21chr3:1110364-1125363 [+] [WOR2, ntar\_614, ntar\_615, ntar\_616, ntar\_617]

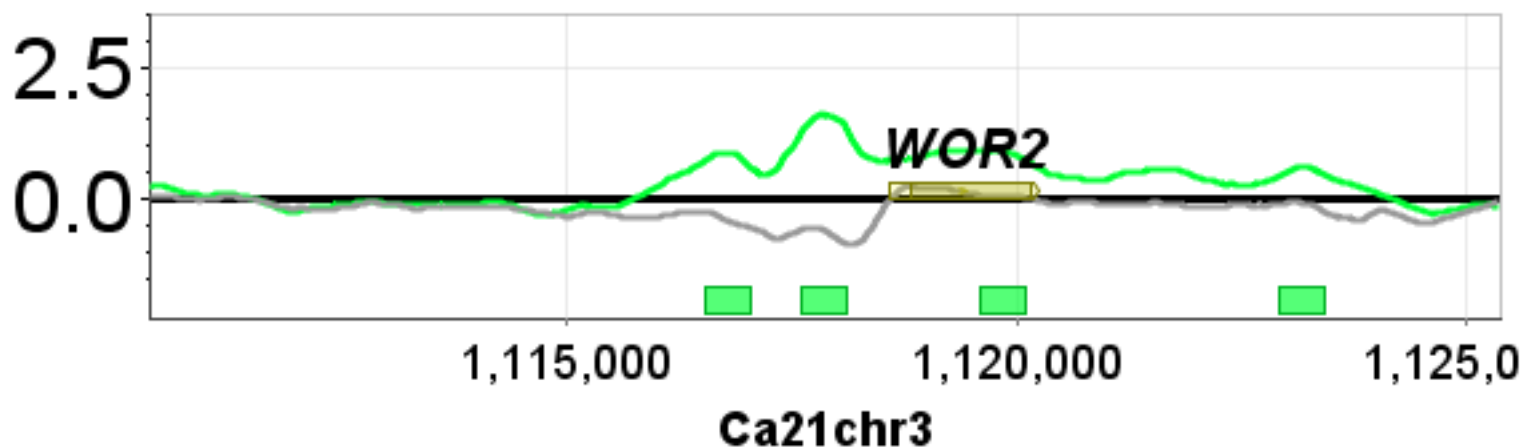

[1.572] Ca21chr2:122311-137310 [+] [orf19.2049, orf19.2050, orf19.2048, orf19.2047, orf19.2051]

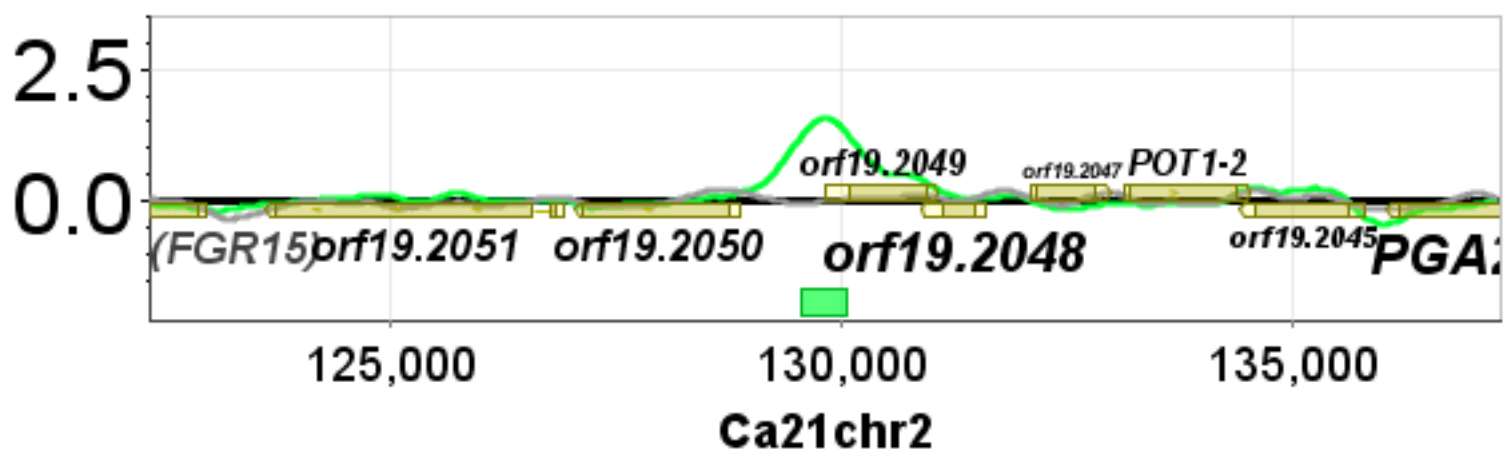

[1.504] Ca21chr1:2395093-2410092 [+] [orf19.2332, orf19.2333, ADA2, RPS17B, BIG1]

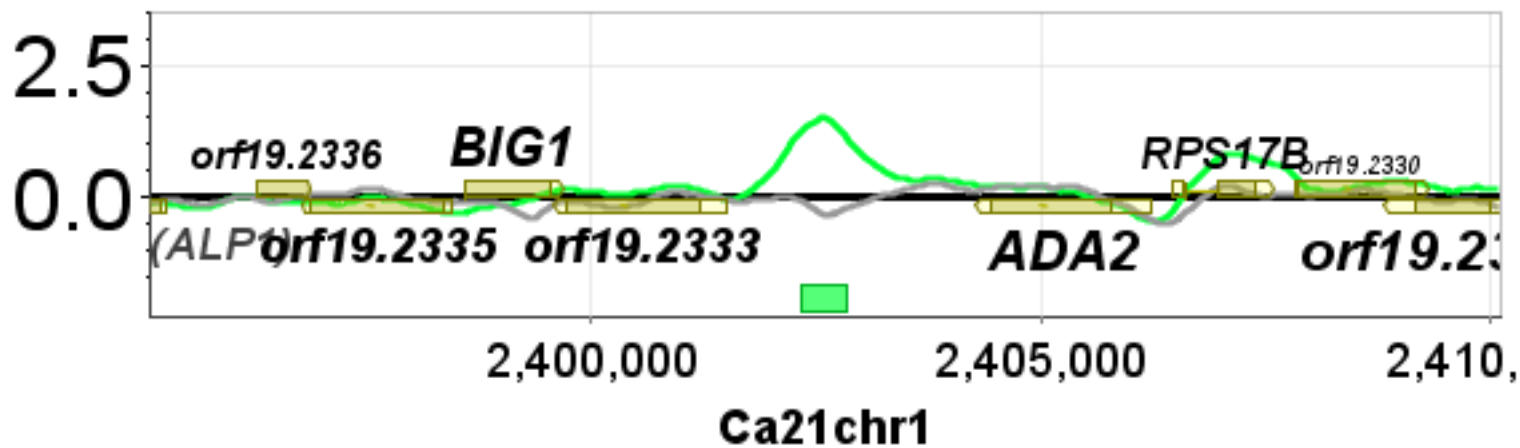

[1.493] Ca21chr3:1437983-1452982 [+] [ALS7, ntar\_656, ISW2, ntar\_657, TSA1B]

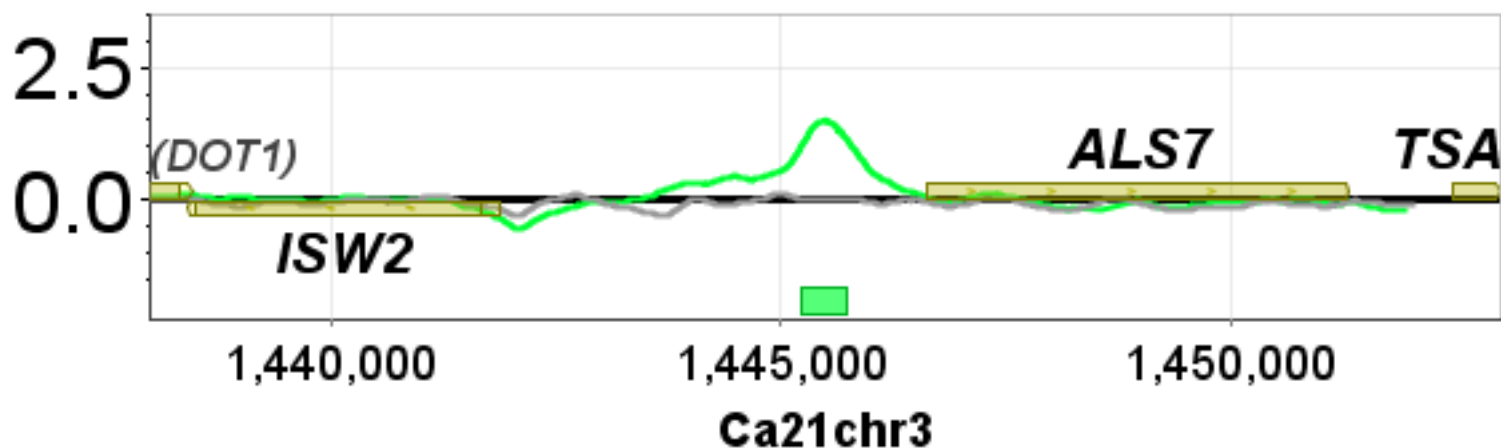

[1.487] Ca21chr4:1417958-1432957 [+] [orf19.2892, orf19.2893, VMA8, orf19.2891, SOU1]

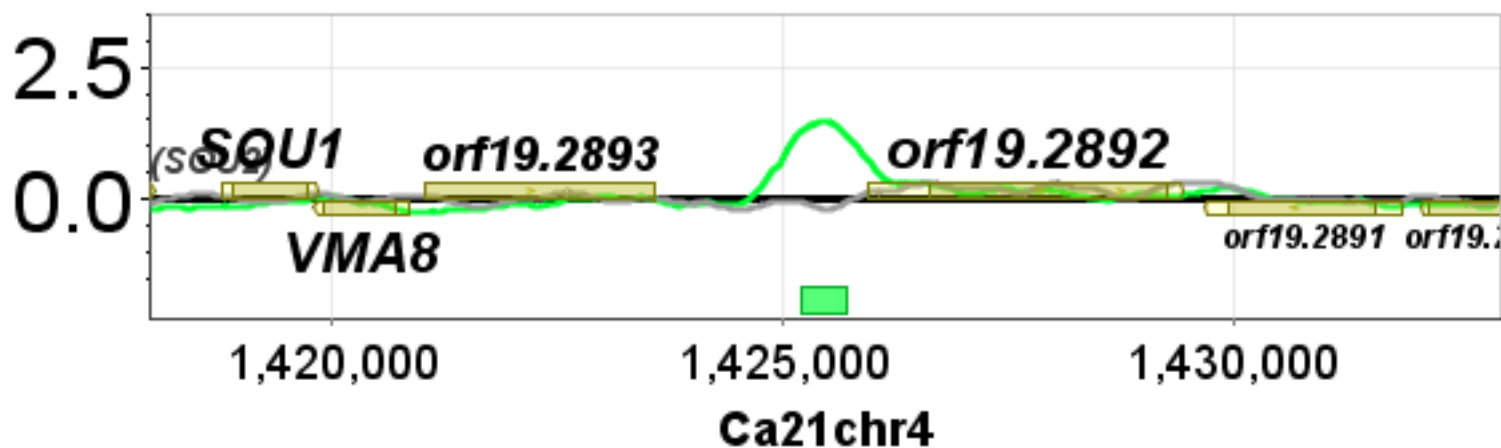

[1.466] Ca21chr5:687403-702402 [+] [ntar\_913, orf19.4342, orf19.4341, orf19.4340.1, orf19.4340]

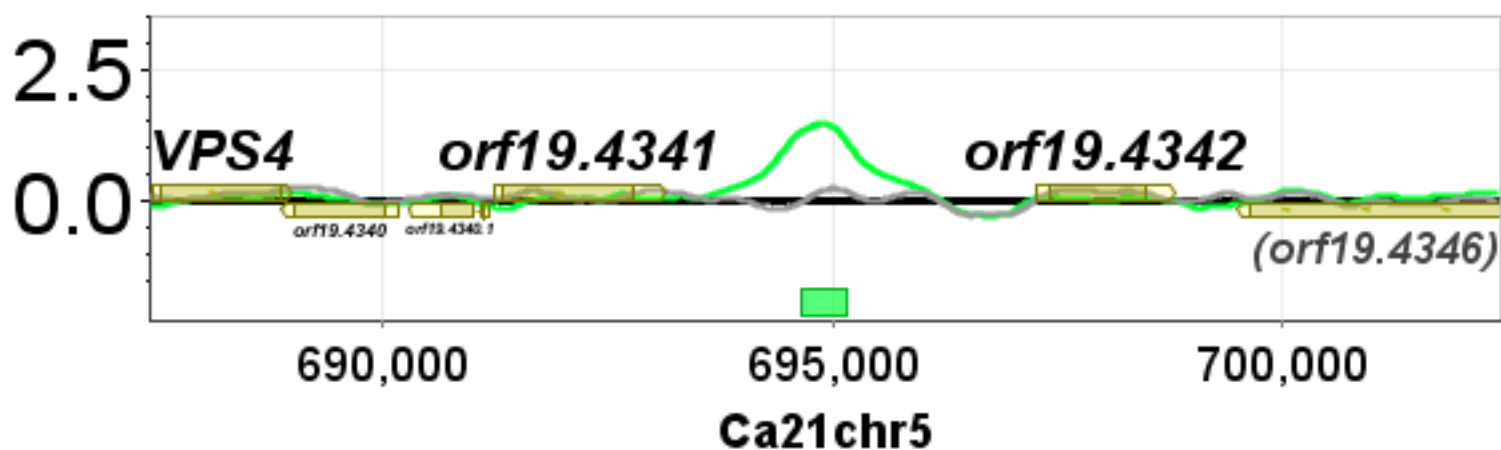

[1.441] Ca21chr1:1039899-1054898 [+] [RHD1, orf19.53, orf19.52, orf19.55, ARG2]

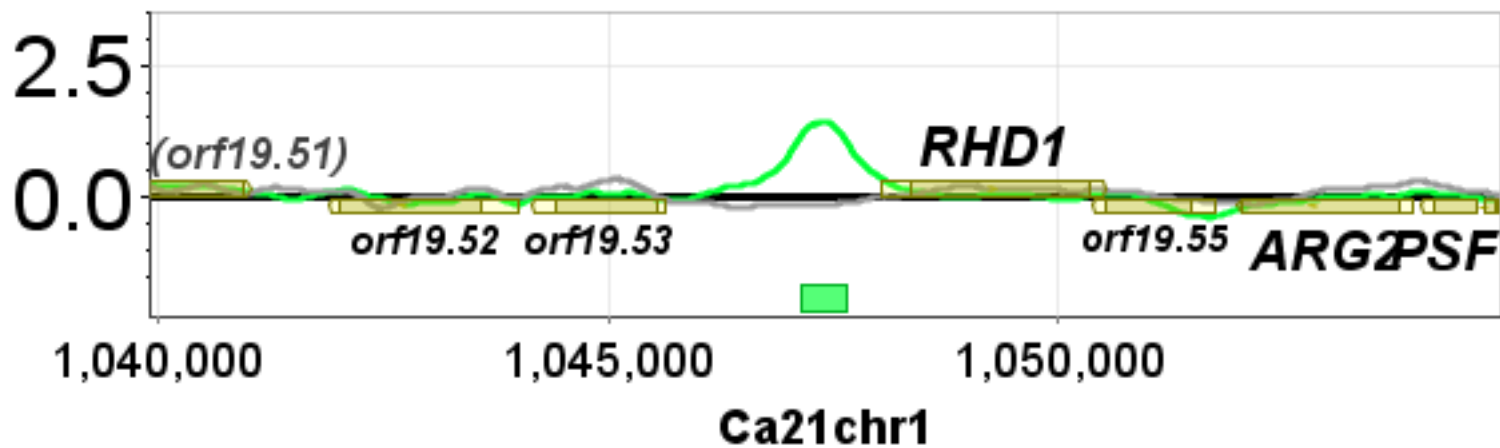

[1.424] Ca21chr7:289929-304928 [+] [ntar\_1086, orf19.6586, ntar\_1087, ntar\_1085, ntar\_1084]

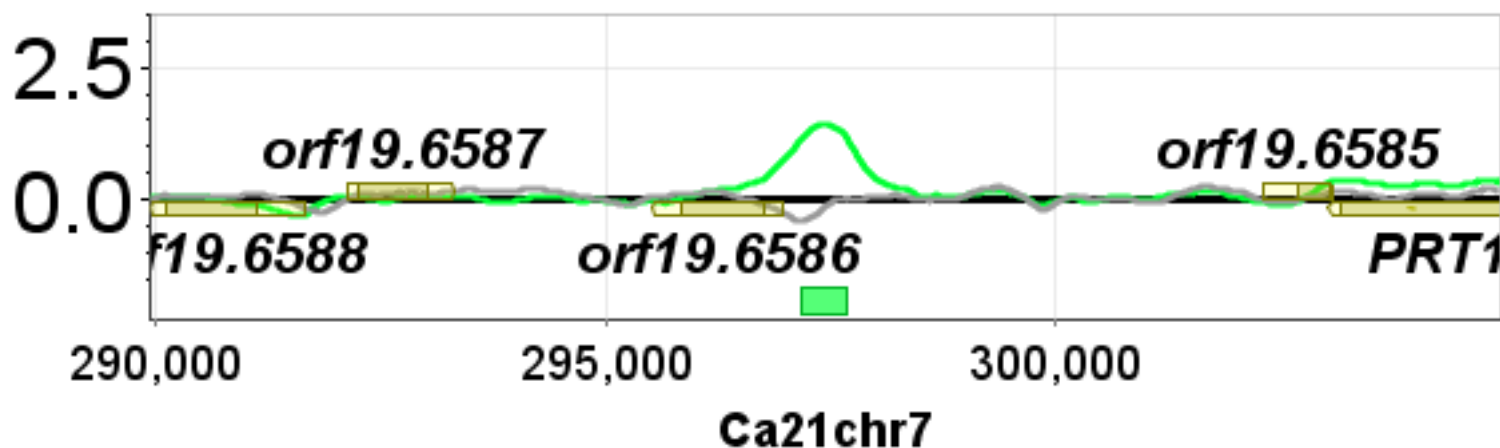

[1.411] Ca21chr1:2267341-2282340 [+] [orf19.4900, ntar\_209, GCA1, ntar\_210, orf19.4901]

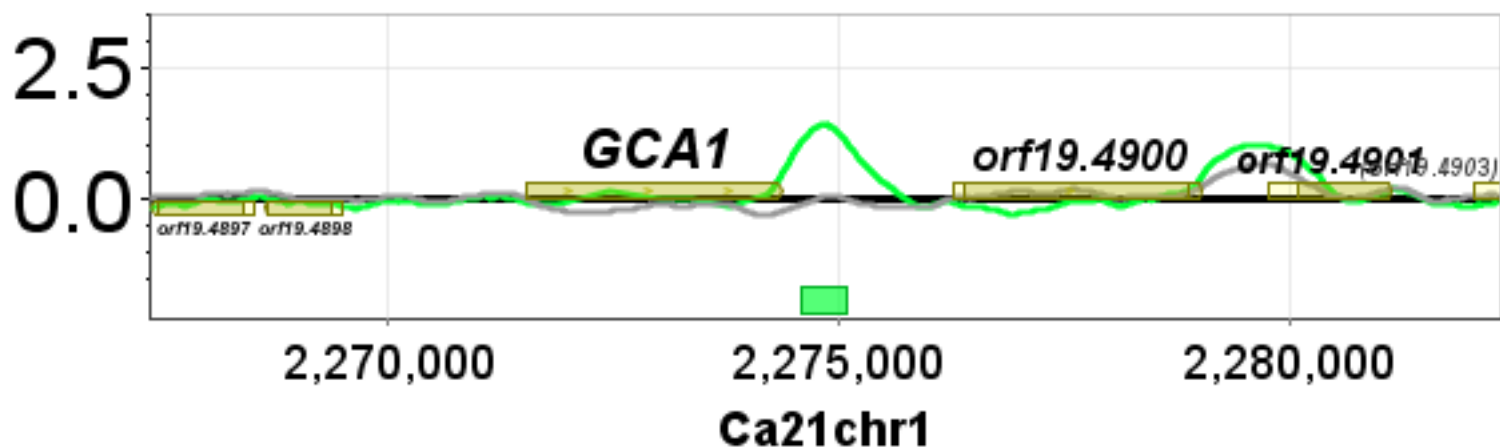

[1.385] Ca21chr3:1581894-1596893 [+] [ntar\_667, ntar\_666, orf19.6805, ntar\_665, orf19.6807]

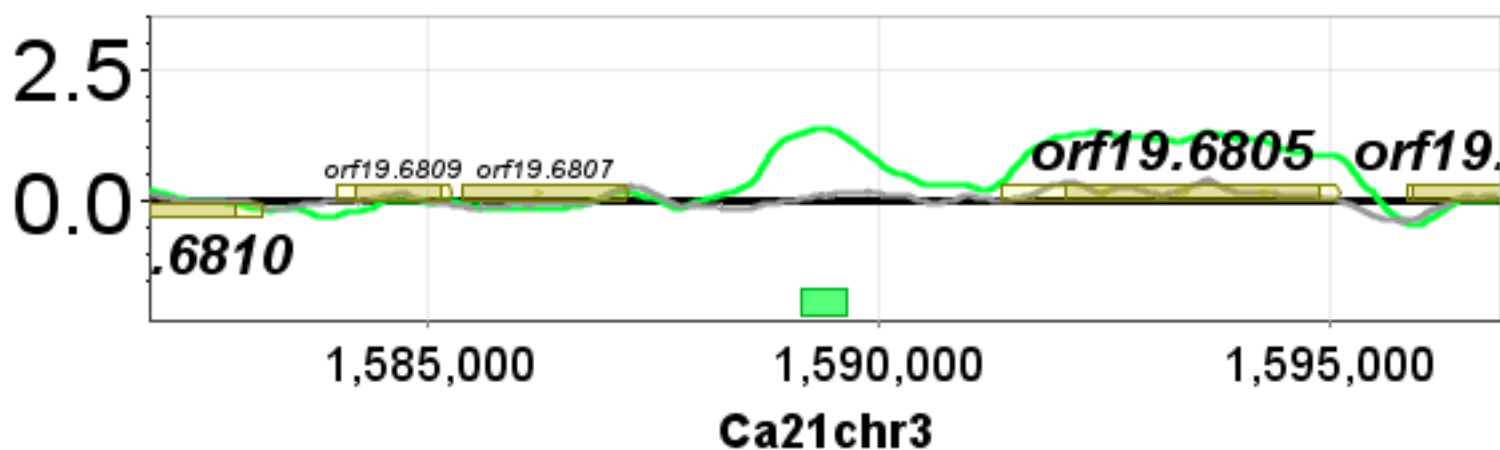

[1.337] Ca21chrR:584367-599366 [+] [orf19.2822, orf19.2821, RFG1]

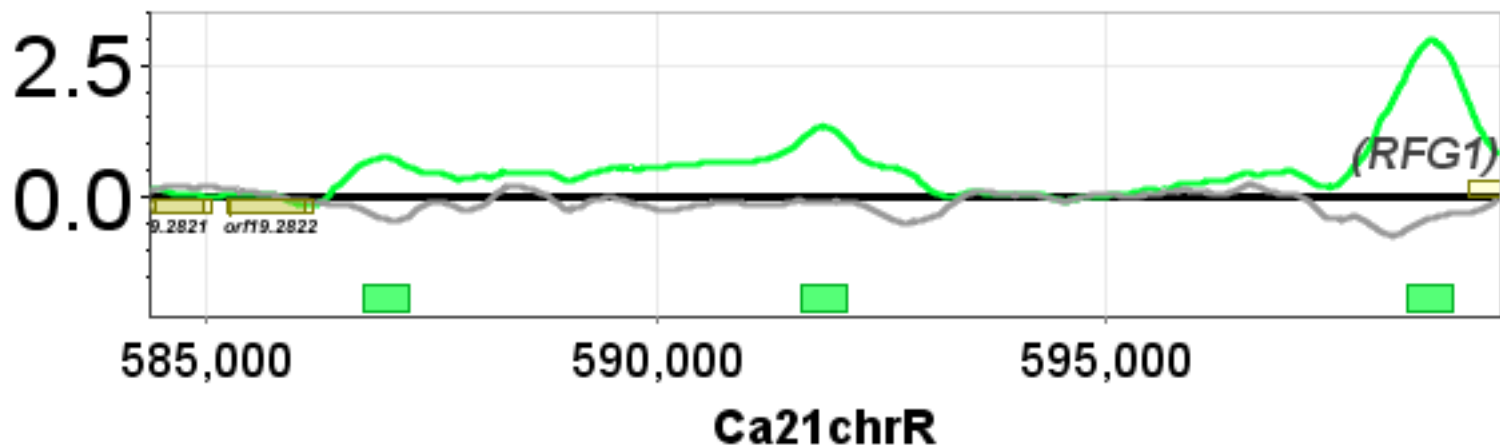

[1.317] Ca21chrR:1518584-1533583 [+] [CRZ2, ntar\_1331, URA2, ALS3]

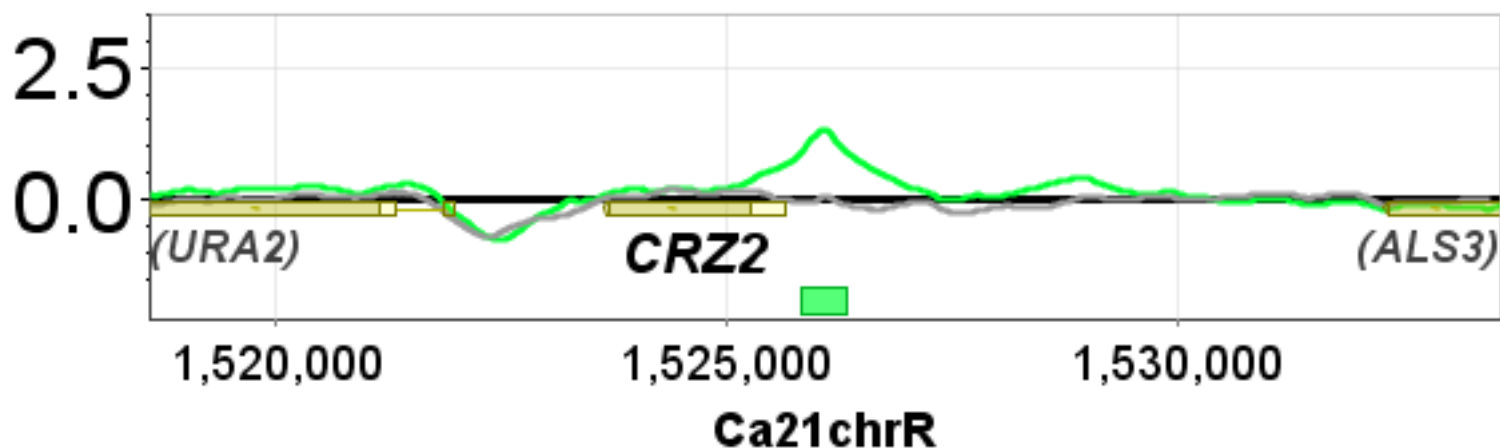

[1.293] Ca21chr3:1719619-1734618 [+] [TCC1, orf19.6736, orf19.6732, orf19.6731.1, orf19.6731]

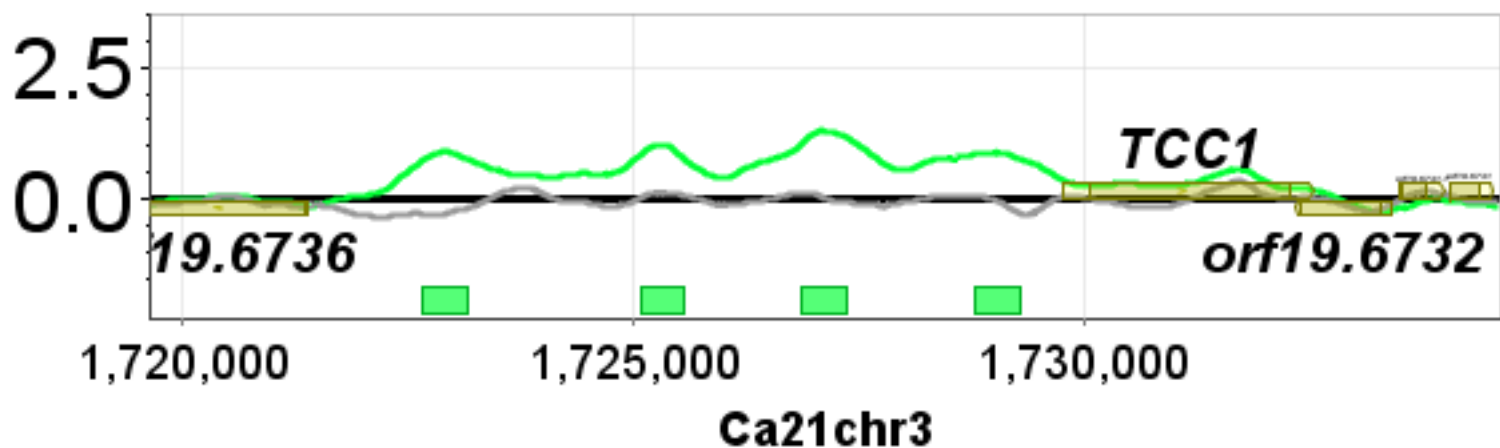

[1.28] Ca21chr1:1074755-1089754 [+] [GAT2, orf19.450, ntar\_104]

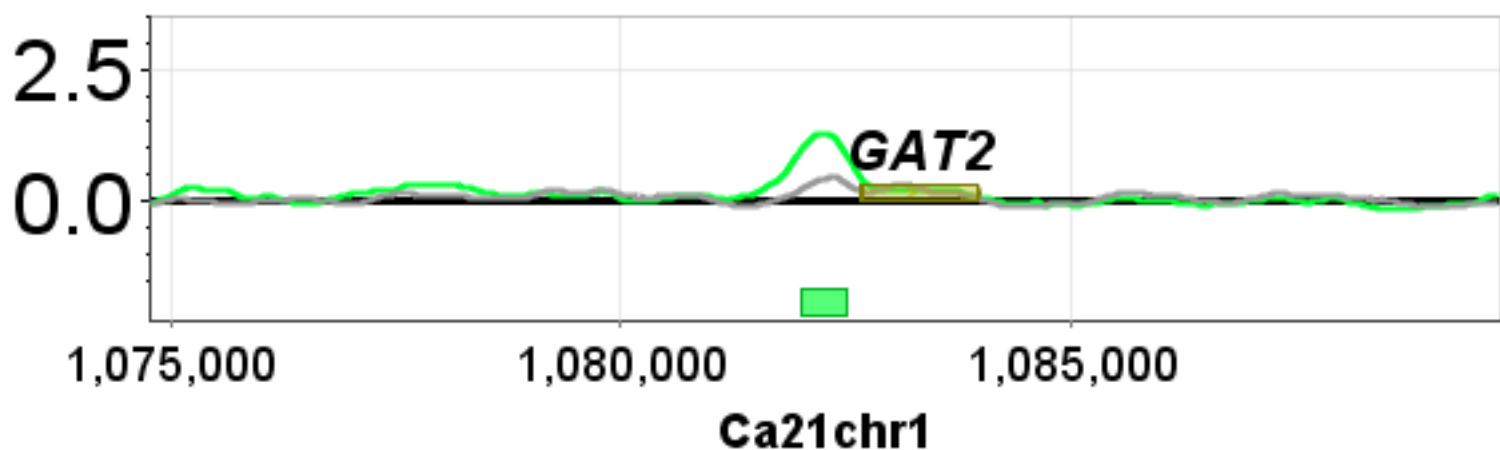



[1.264] Ca21chr4:242197-257196 [+] [orf19.4666, orf19.4665, NAT4, orf19.4668, ntar\_728]

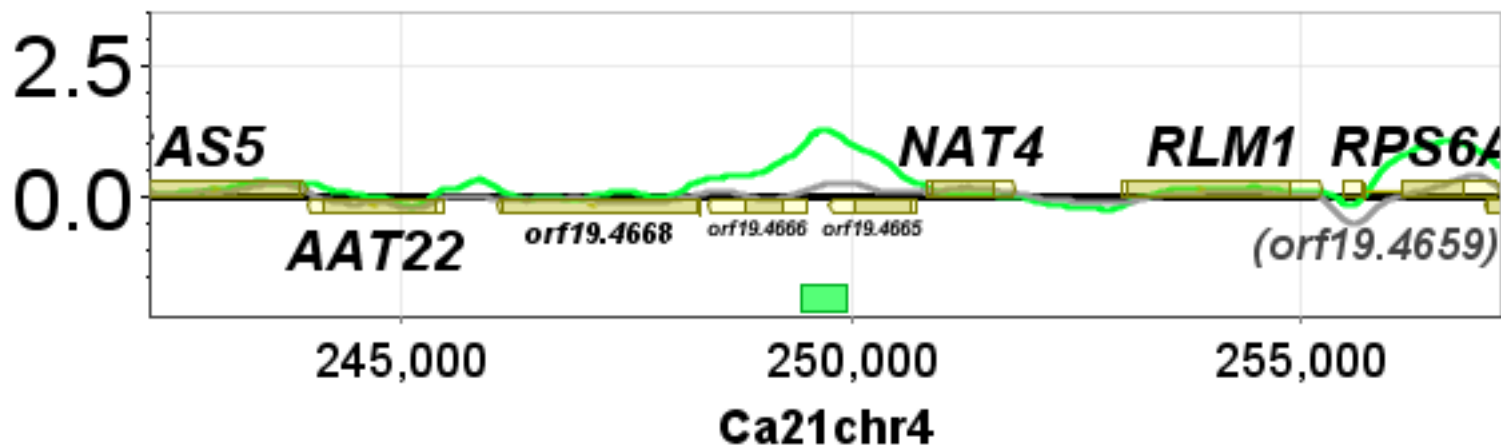

[1.211] Ca21chr2:1750917-1765916 [+] [PST2, orf19.3611, ntar\_457, orf19.3613, ntar\_456]

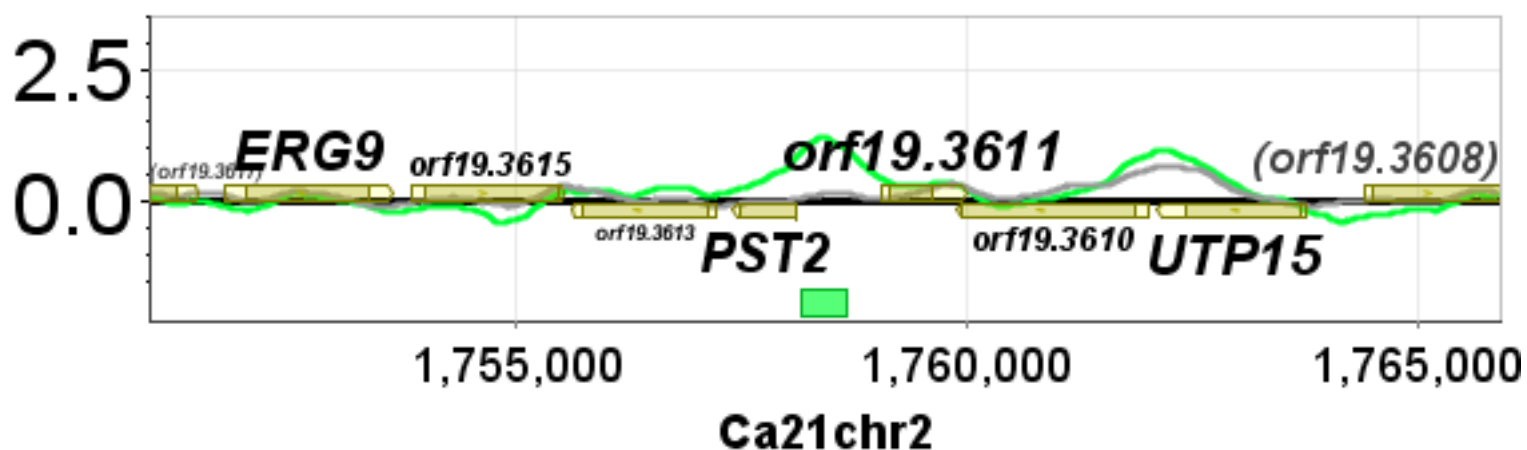

[1.204] Ca21chr5:247166-262165 [+] [orf19.1958, orf19.1959, ntar\_866, ntar\_867, ntar\_864]

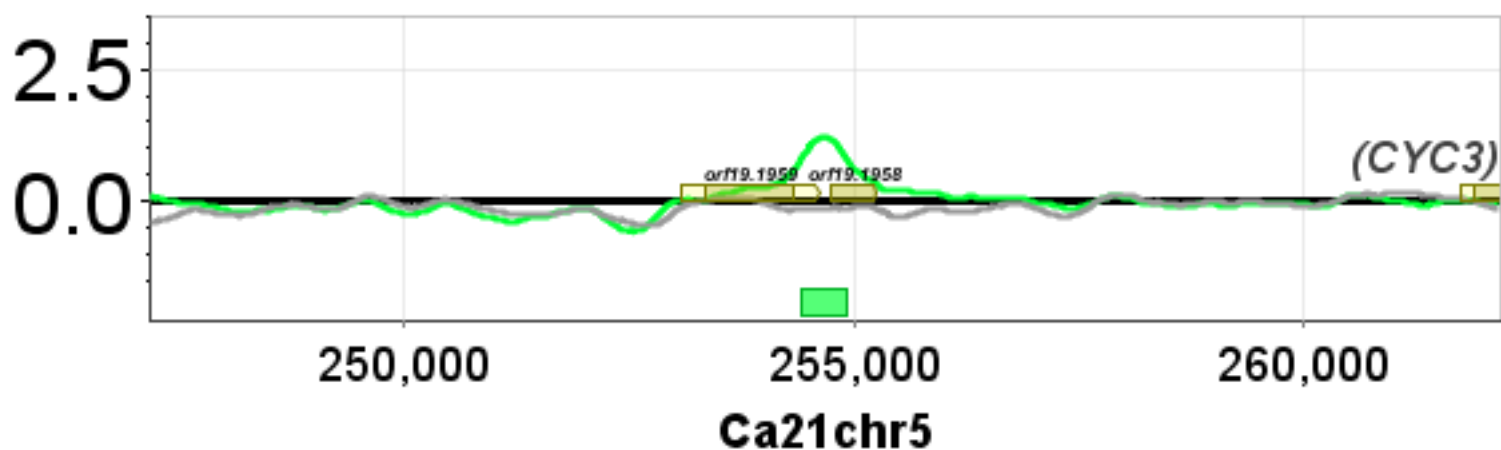

[1.195] Ca21chr5:111106-126105 [+] [orf19.934, orf19.933, ntar\_855, orf19.932, AGA1]

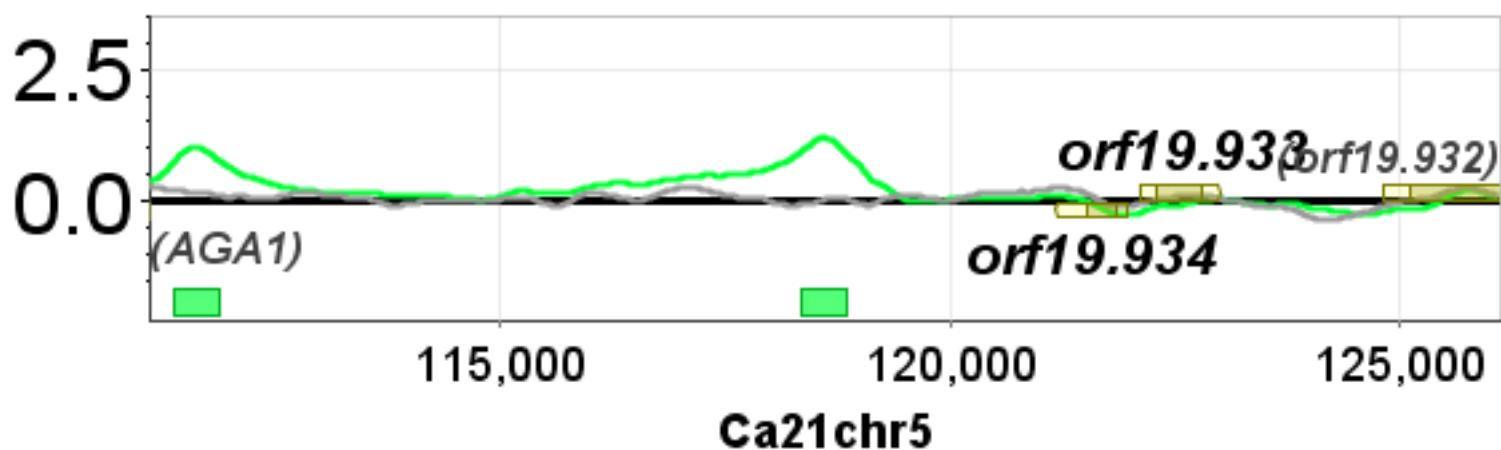

[1.194] Ca21chr5:914704-929703 [+] [CHT2, orf19.3897, orf19.3894, ntar\_941, orf19.3898]

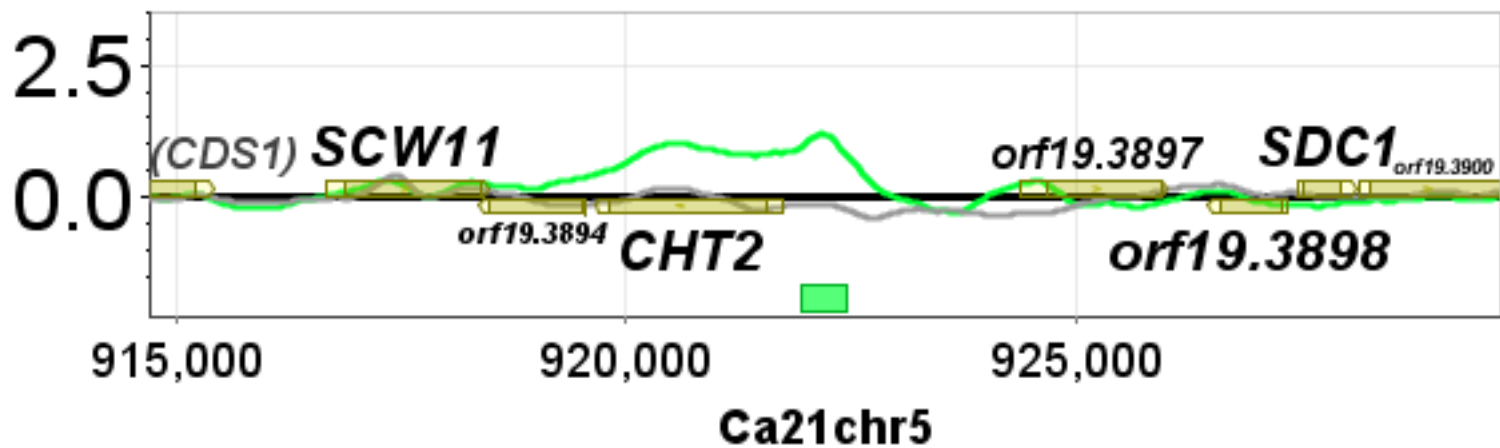

[1.169] Ca21chrR:1915990-1930989 [+] [orf19.7296, ntar\_1370, ntar\_1369, orf19.7295, orf19.7297]

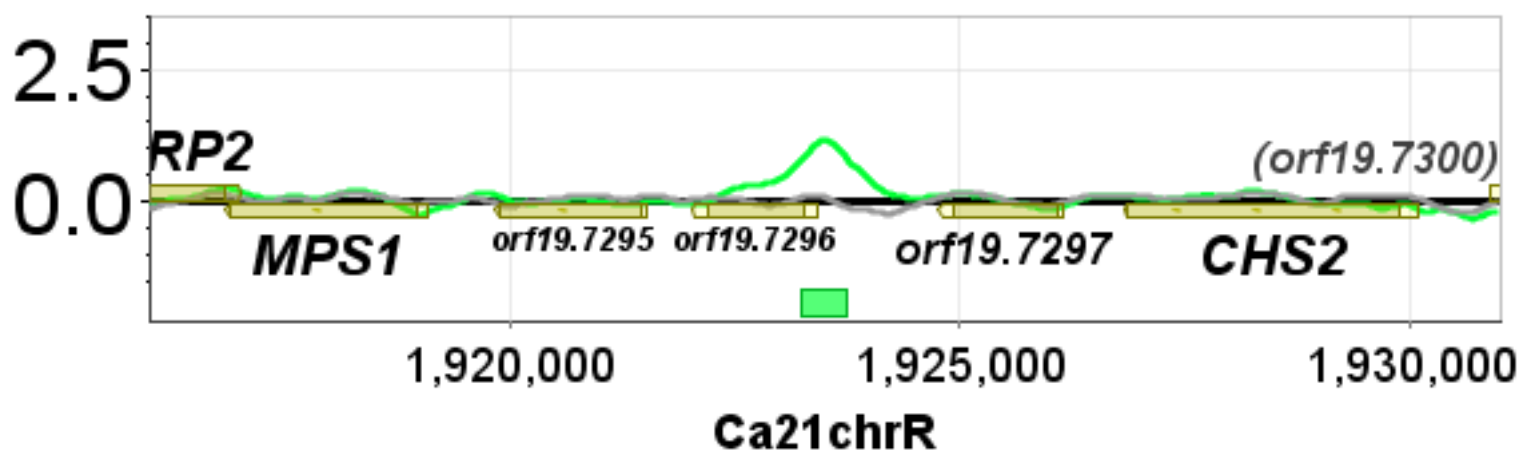

[1.152] Ca21chr2:1739027-1754026 [+] [YWP1, ntar\_452, ntar\_451, ntar\_449, ntar\_450]

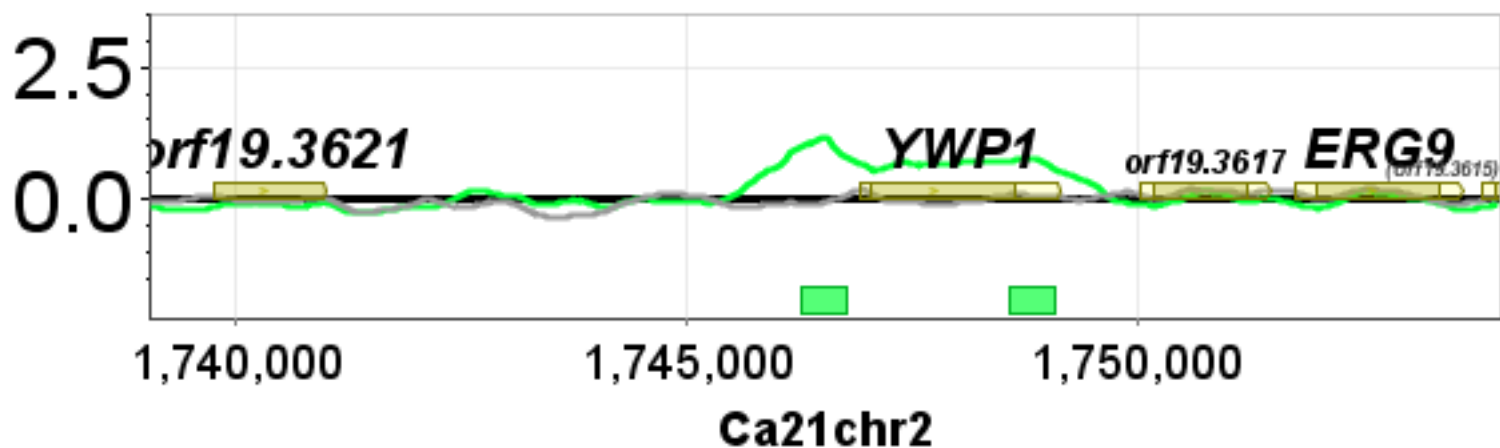

[1.152] Ca21chr6:29363-44362 [+] [ntar\_969, orf19.1189, CPH2, ntar\_968, orf19.1186]

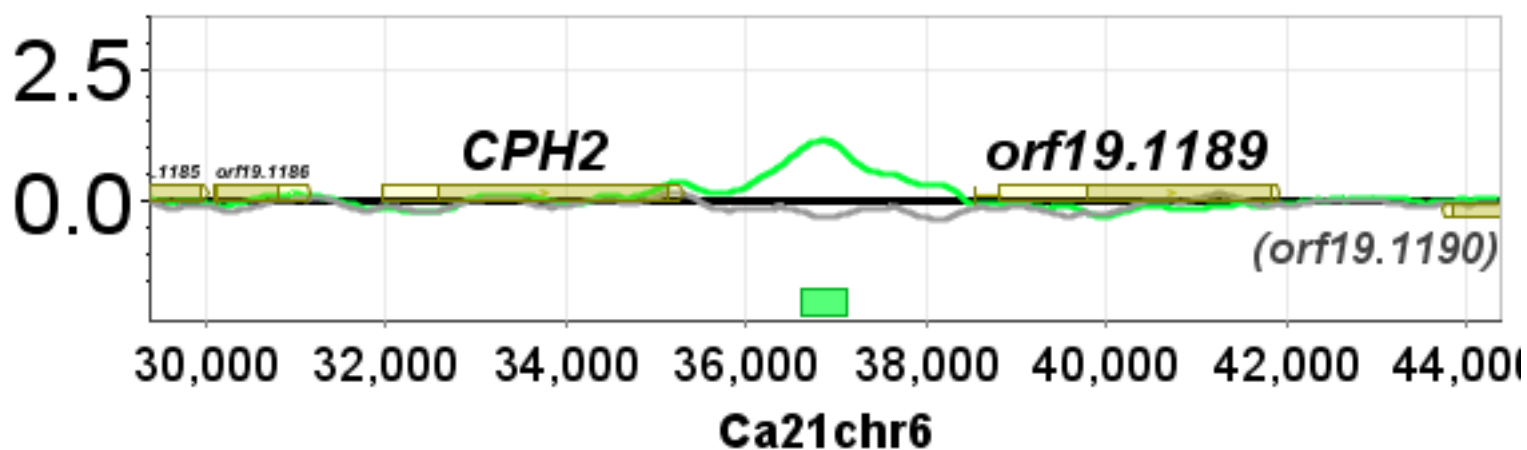

[1.118] Ca21chr1:564972-579971 [+] [orf19.2962, orf19.2963, orf19.2961, orf19.2964, FRS2]

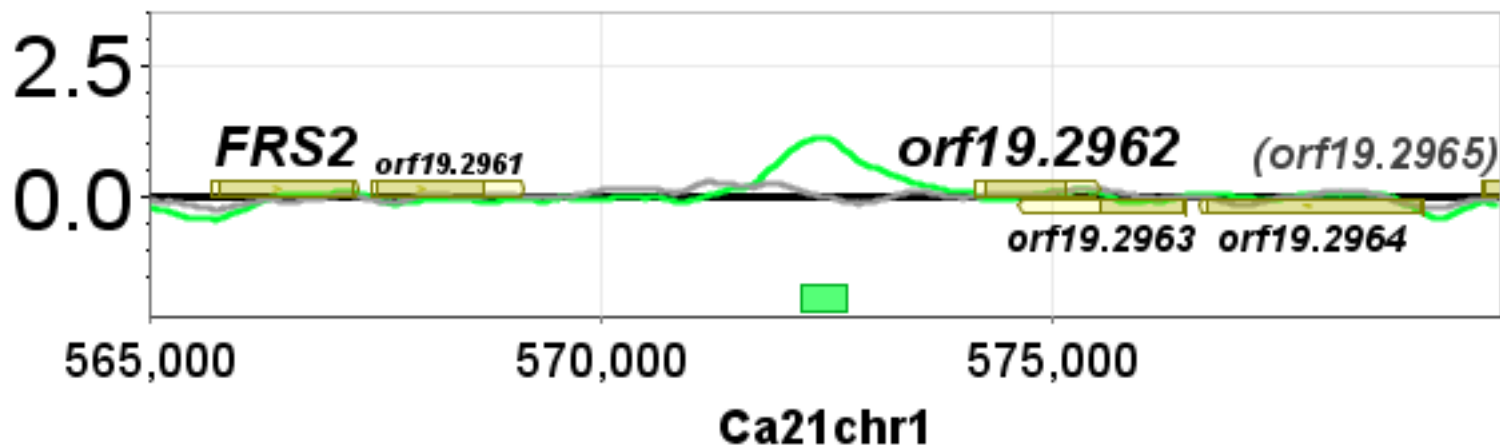

[1.058] Ca21chr3:37359-52358 [+] [RHR2, UTP8, orf19.5438, orf19.5433, TPT1]

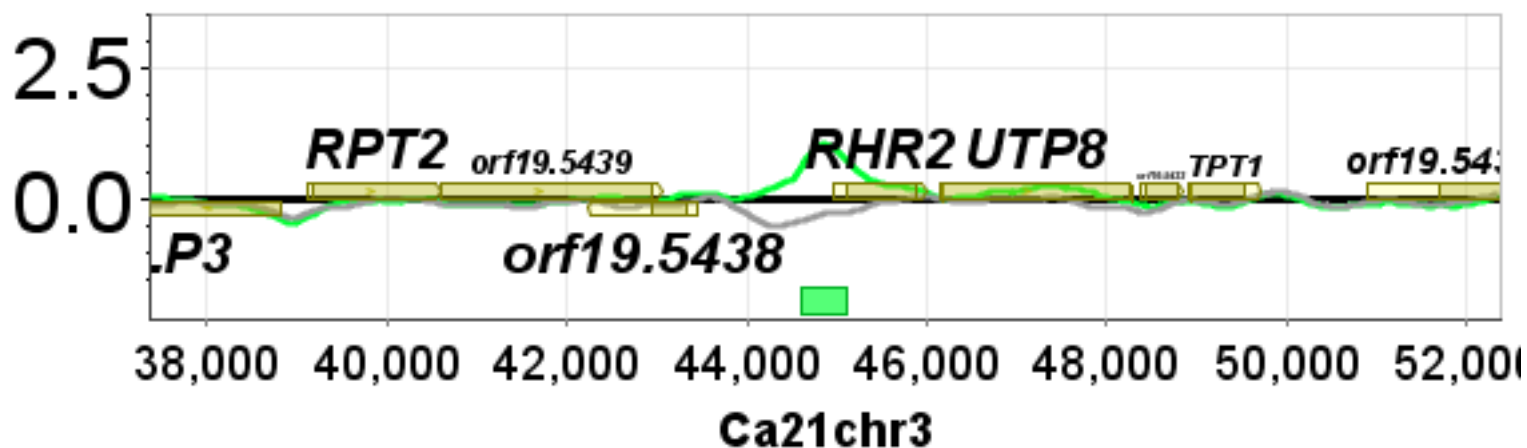

[1.027] Ca21chr3:1717824-1732823 [+] [orf19.6736, TCC1, ntar\_685, orf19.6732]

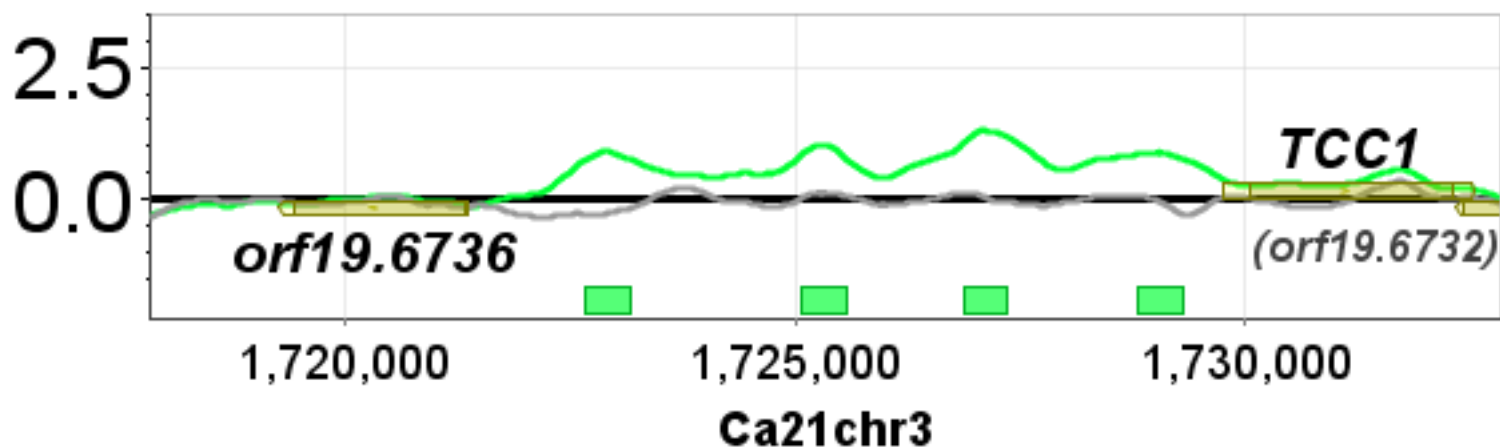

[1.022] Ca21chr5:104127-119126 [+] [AGA1, ntar\_854, orf19.936, orf19.937, orf19.938]

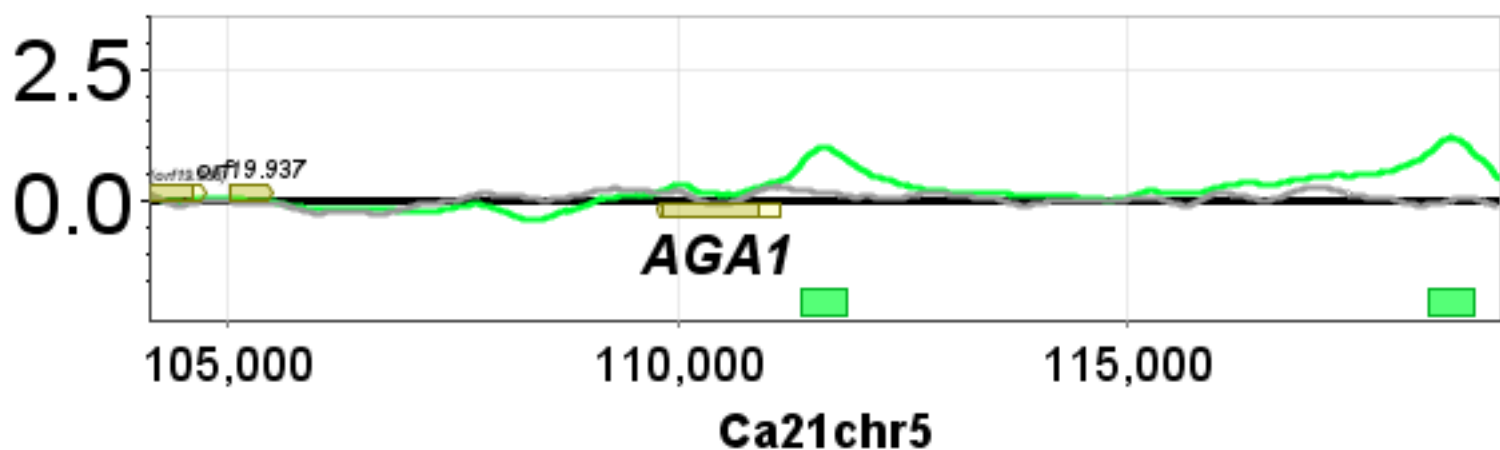

[1.018] Ca21chr4:434277-449276 [+] [ZCF25, orf19.4567, orf19.4566, orf19.4569, orf19.4570]

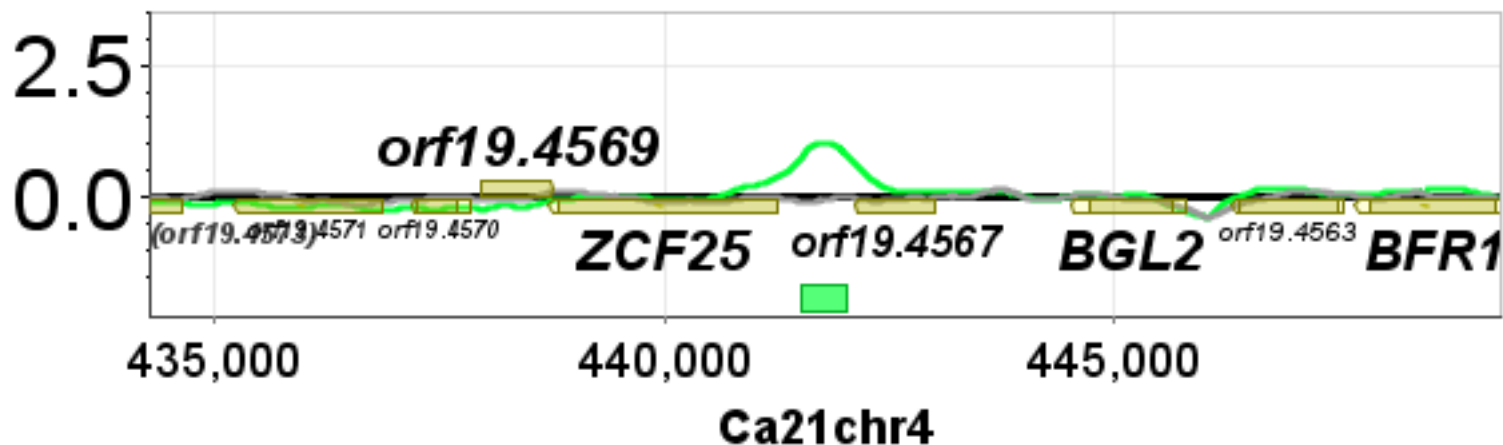

[1.013] Ca21chr3:820862-835861 [+] [orf19.2812, orf19.6922, AAP1, orf19.2813, CTN3]

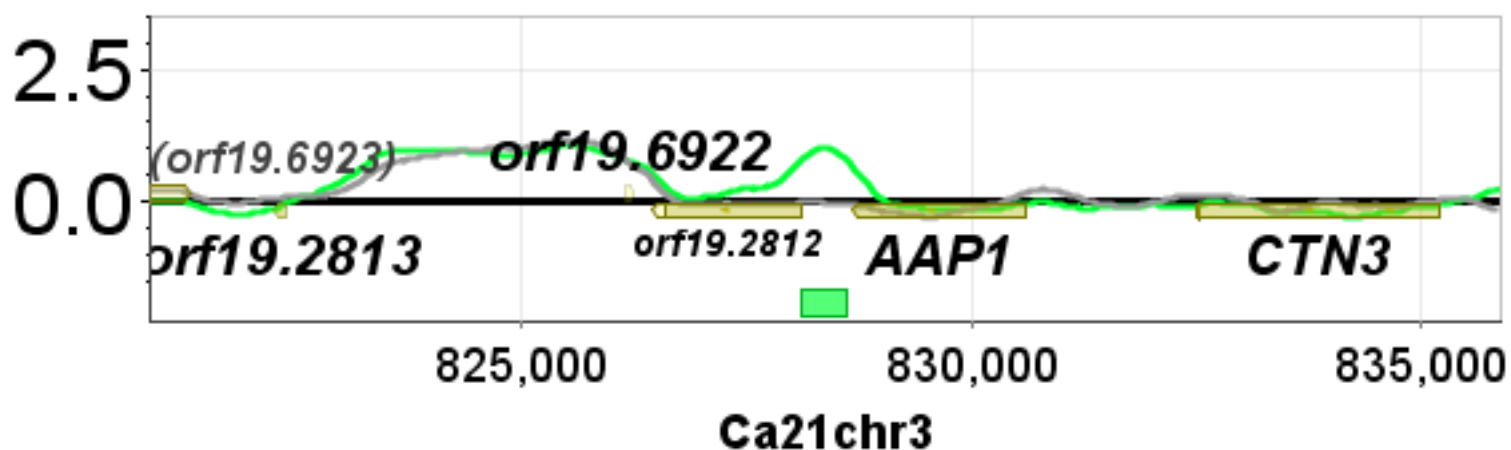

[0.991] Ca21chr3:1358084-1373083 [+] [CAM1, MNN9, orf19.7381, NOG1]

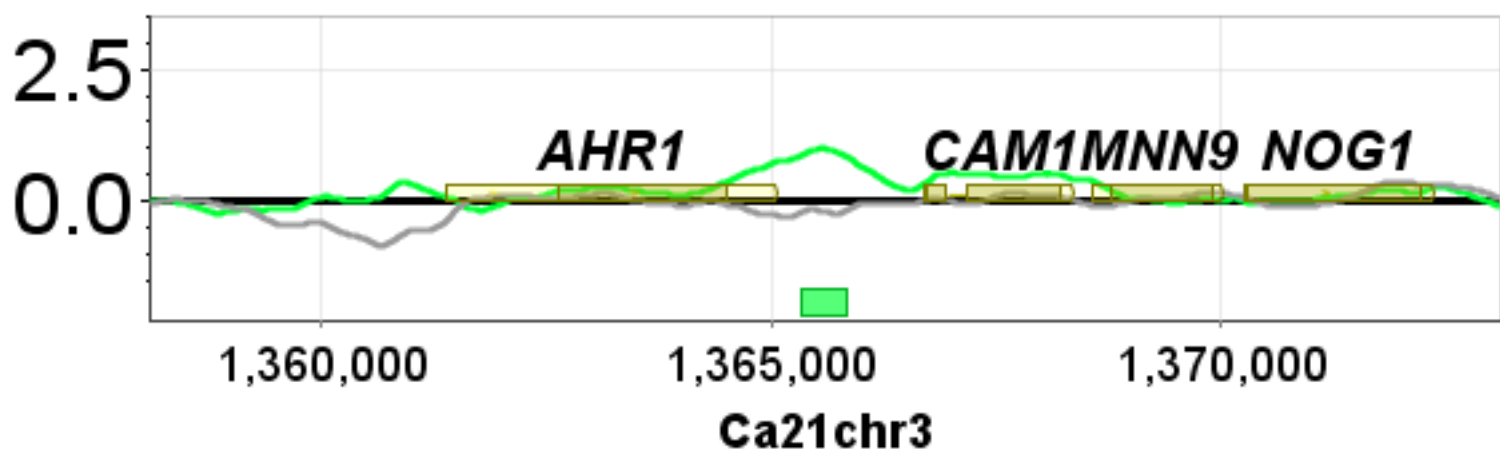

[0.983] Ca21chrR:495971-510970 [+] [IFC1, orf19.3744, orf19.3743, orf19.3748, orf19.3742]

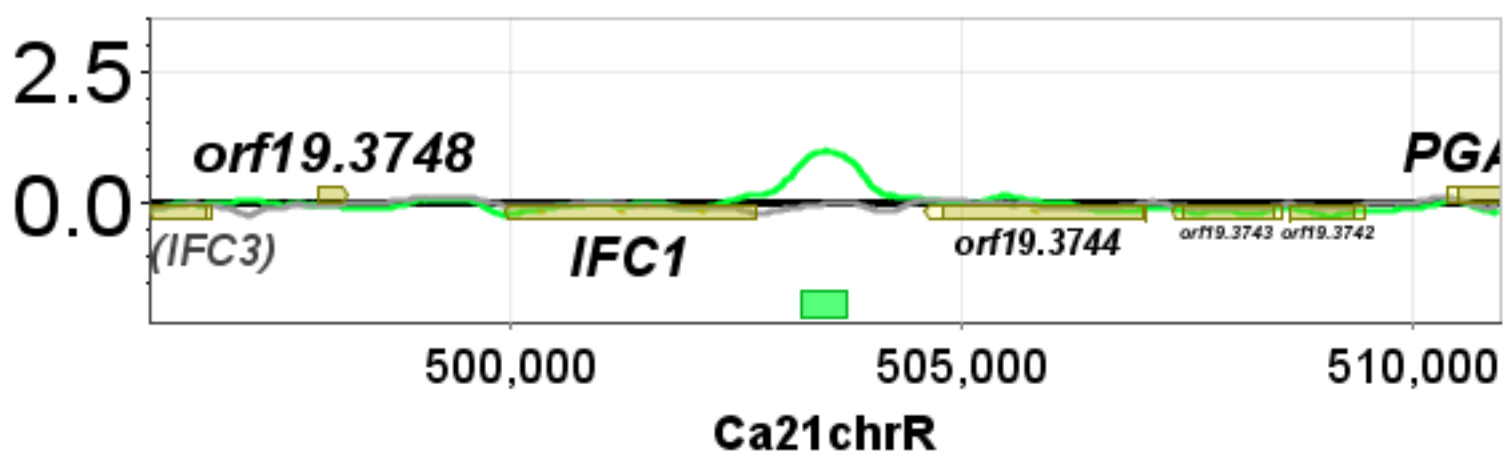

[0.969] Ca21chr1:2839098-2854097 [+] [FAD3, OP4, orf19.4932, RPL14, orf19.4936]

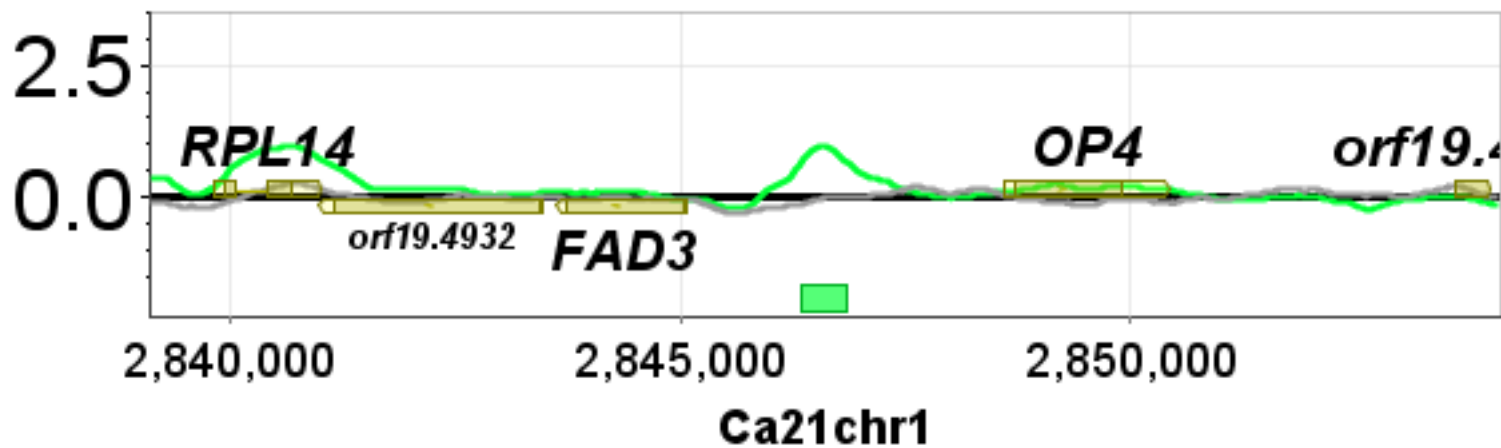

[0.966] Ca21chr7:444015-459014 [+] [CUP9, ntar\_1102, ntar\_1103, EXO70, ntar\_1101]

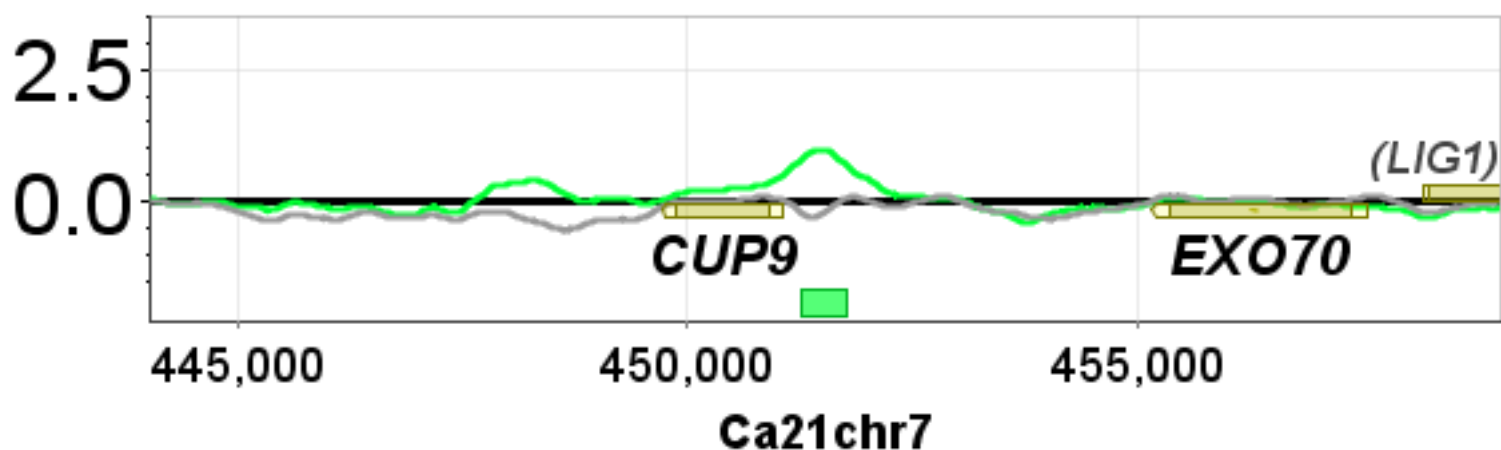

[0.964] Ca21chrR:872396-887395 [+] [orf19.467, ntar\_1253, ntar\_1254, ntar\_1255, HST7]

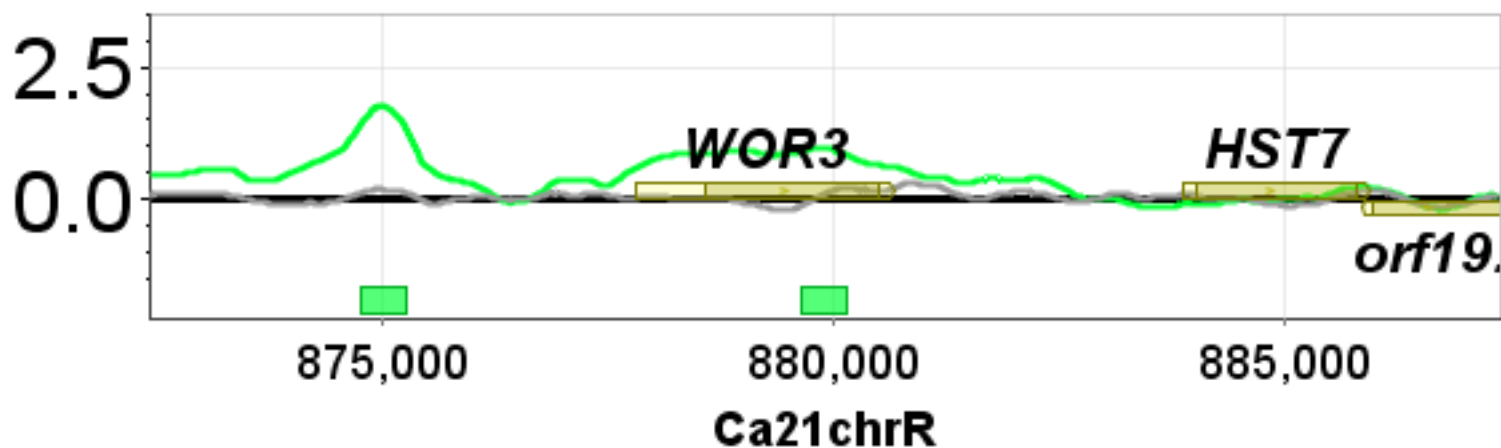

[0.933] Ca21chr2:1142197-1157196 [+] [orf19.6874, VPS35, ts(aga)4, orf19.6873.1, ntar\_396]

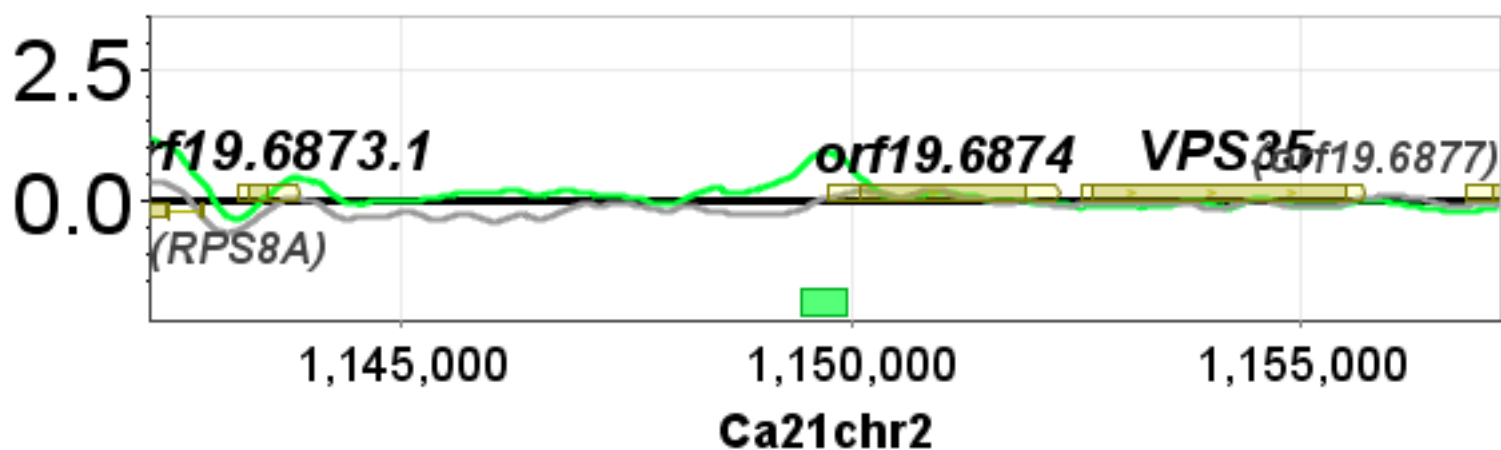

[0.908] Ca21chr3:1112340-1127339 [+] [WOR2, ntar\_614, ntar\_615, ntar\_616, ntar\_617]

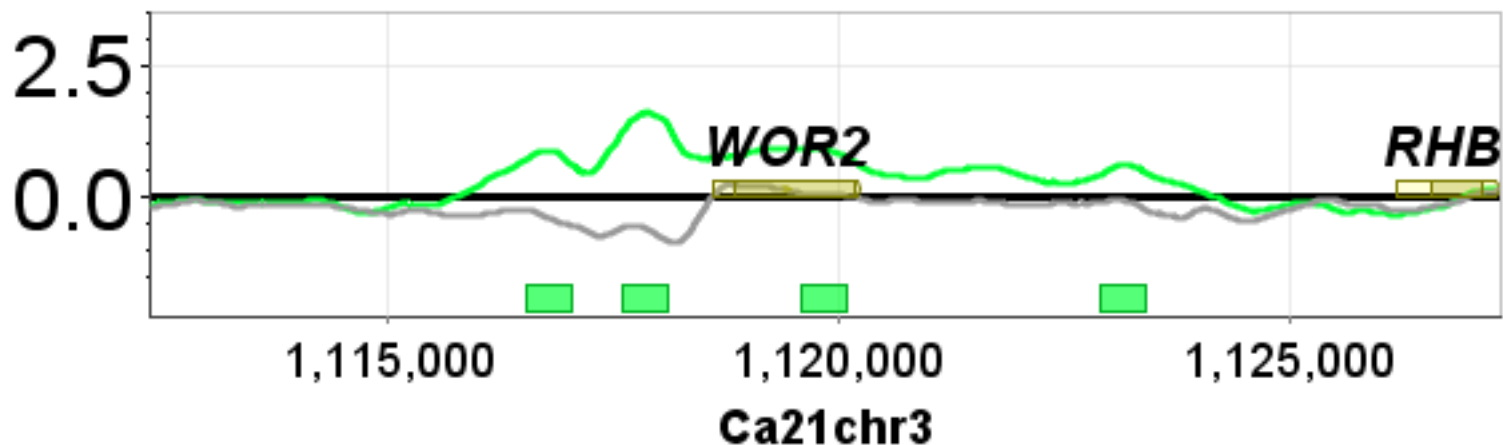

[0.899] Ca21chr3:1715413-1730412 [+] [orf19.6736, ntar\_685, orf19.6737, TCC1, tf(qaa)5]

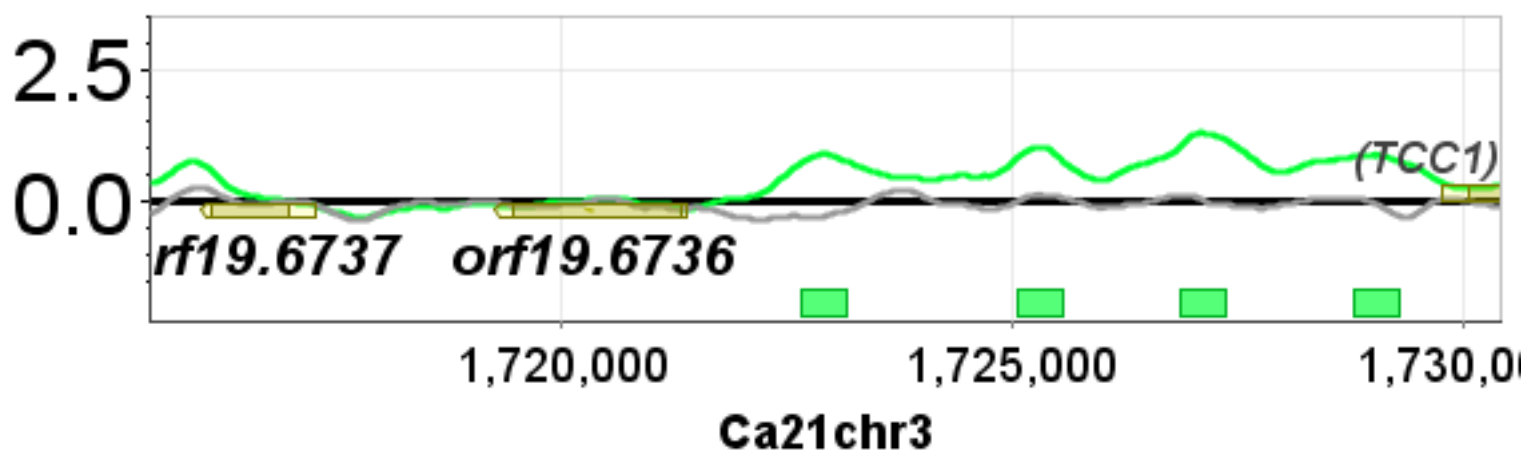

[0.893] Ca21chr5:712640-727639 [+] [orf19.4349, ntar\_1412, orf19.4348, ntar\_916, orf19.2657]

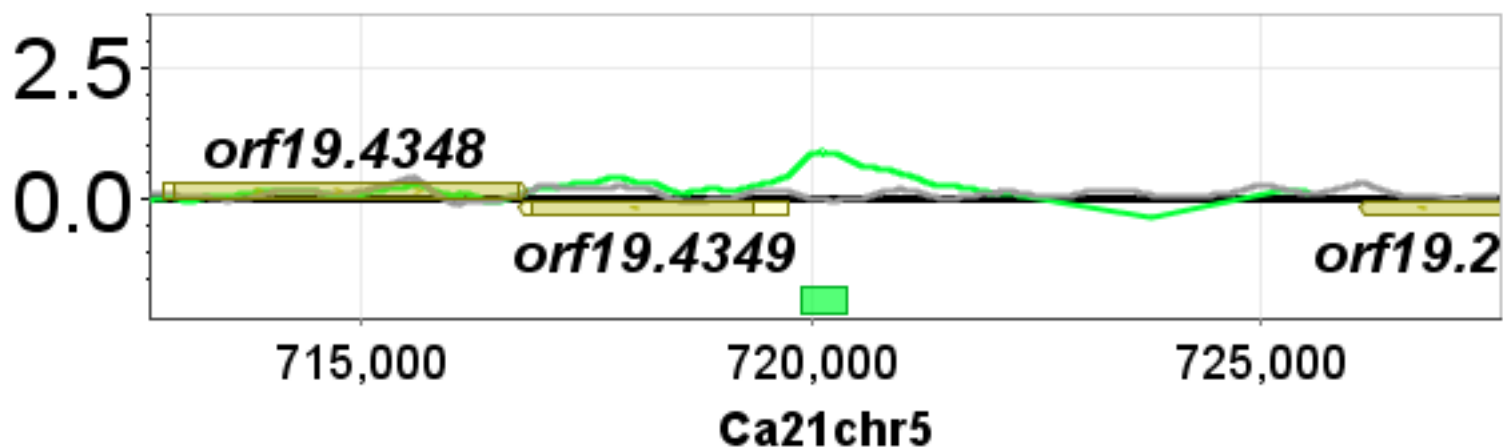

[0.889] Ca21chrR:1714318-1729317 [+] [EFG1, ntar\_1352, ntar\_1353, ntar\_1351, orf19.609]

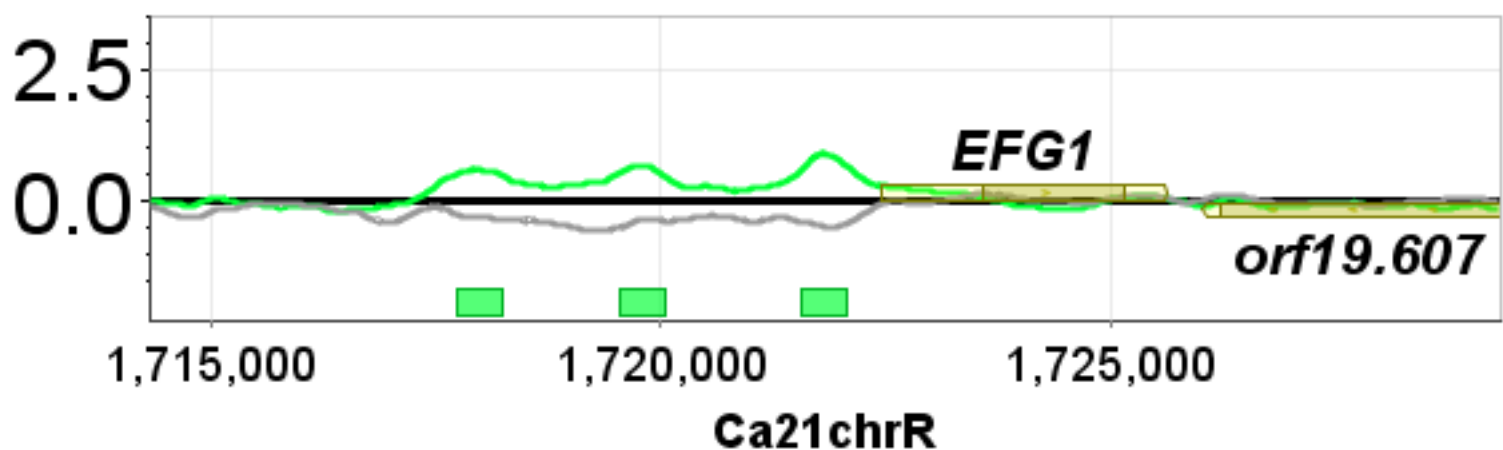

[0.883] Ca21chr3:1721555-1736554 [+] [TCC1, orf19.6732, orf19.6731.1, orf19.6731, ntar\_686]

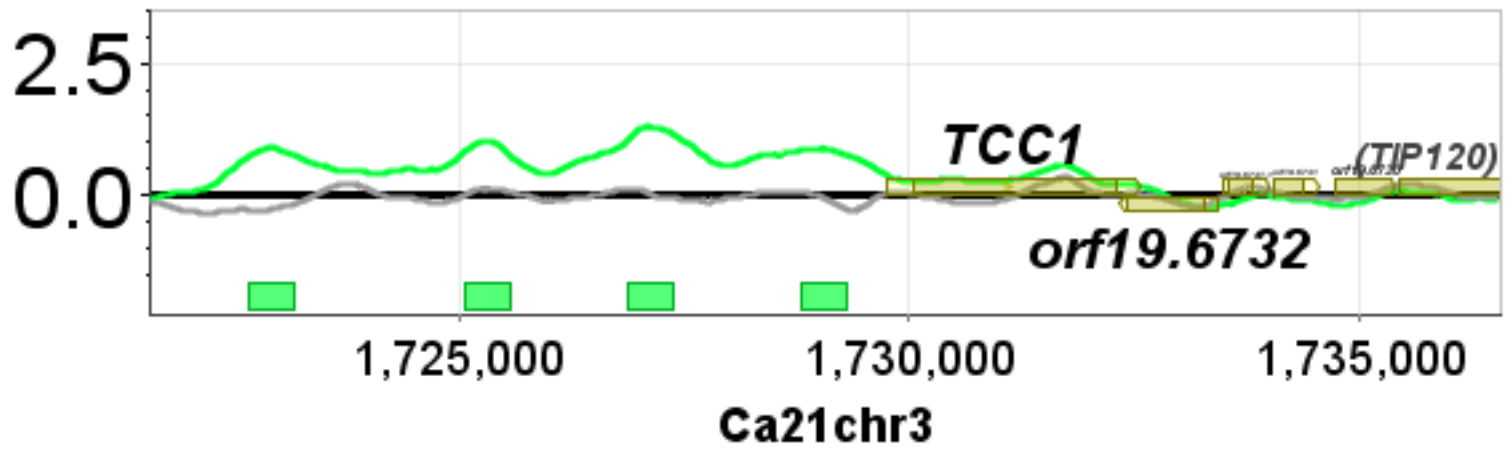

[0.866] Ca21chr1:2219052-2234051 [+] [WOR1, ntar\_207, orf19.4883]

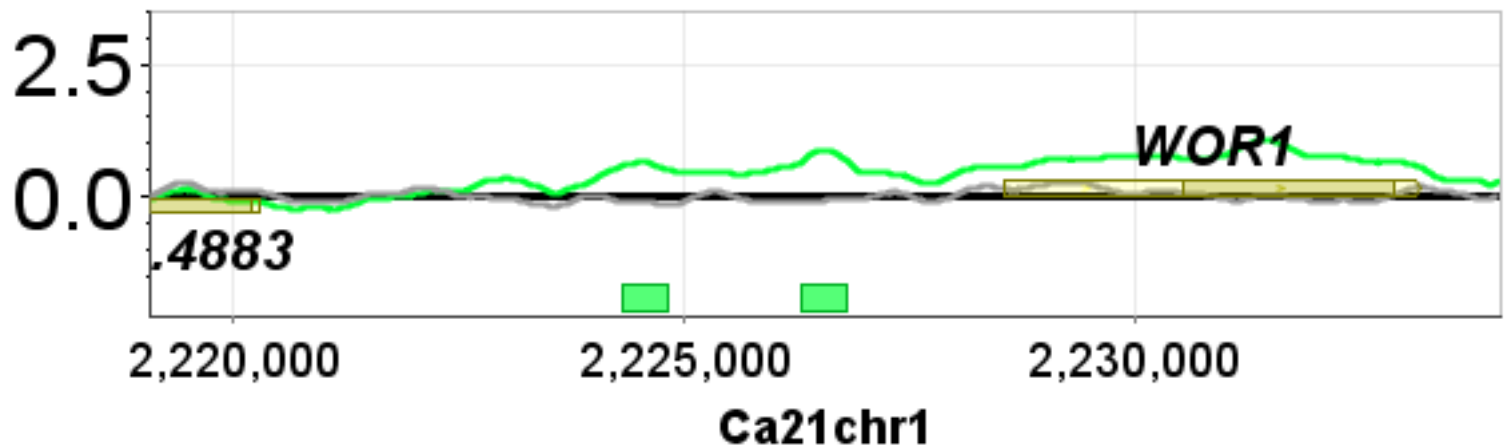

[0.859] Ca21chr3:1109291-1124290 [+] [WOR2, ntar\_614, ntar\_615, ntar\_616, ntar\_617]

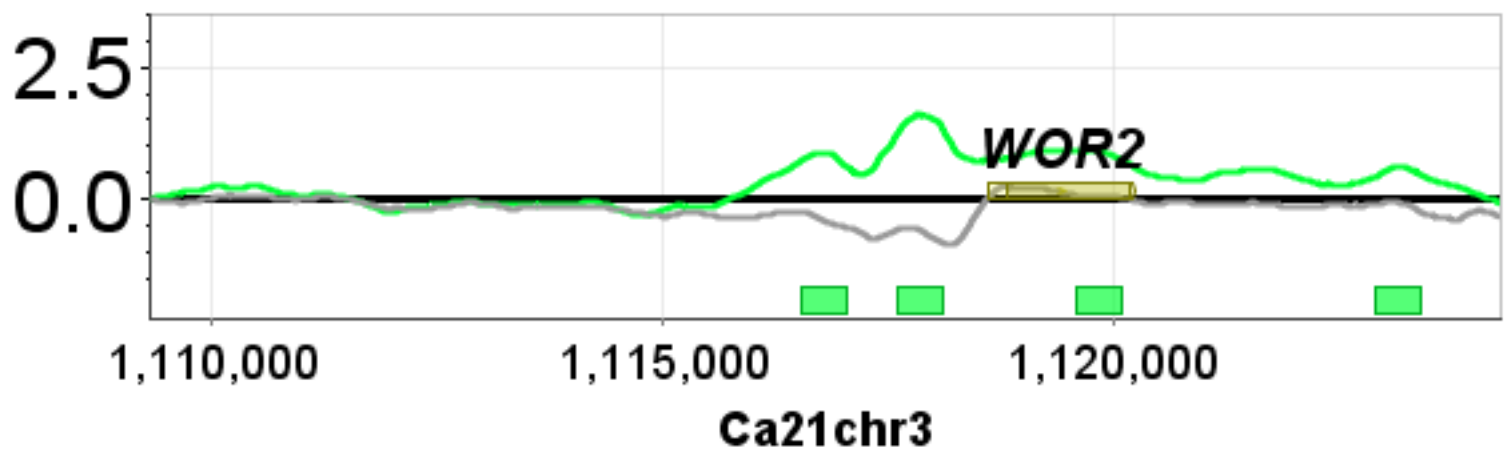

[0.857] Ca21chr2:736693-751692 [+] [ADAEC, orf19.867, ntar\_354, RAD32, orf19.864]

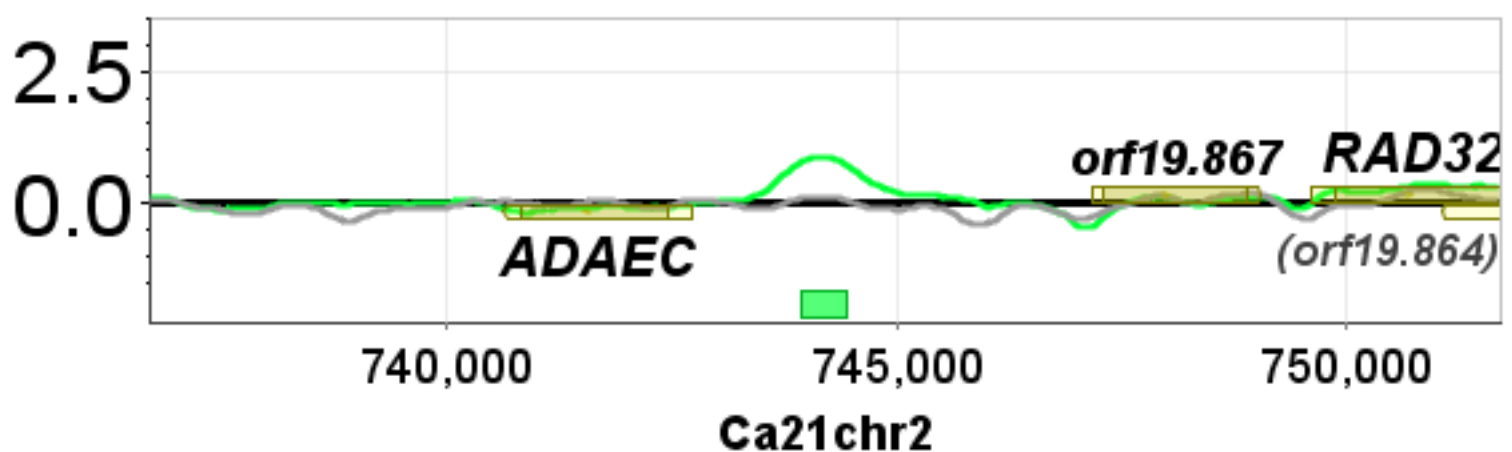

[0.856] Ca21chr1:286443-301442 [+] [orf19.3336, orf19.3335, ntar\_28, RPS21, orf19.3337]

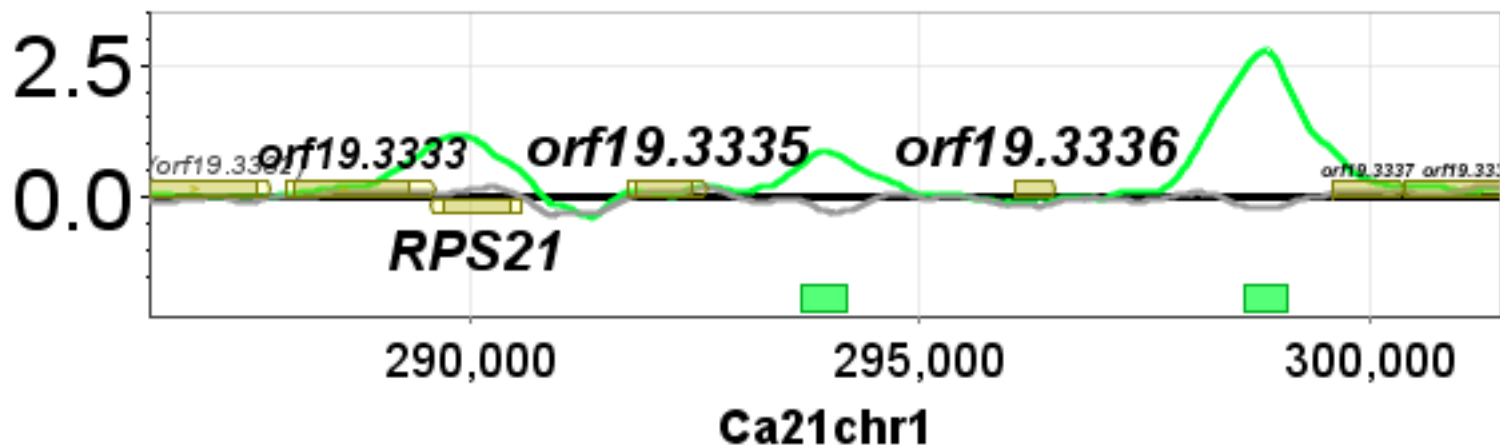

[0.833] Ca21chr7:104885-119884 [+] [ntar\_1413, orf19.7054, GAC1, orf19.7055, orf19.7056]

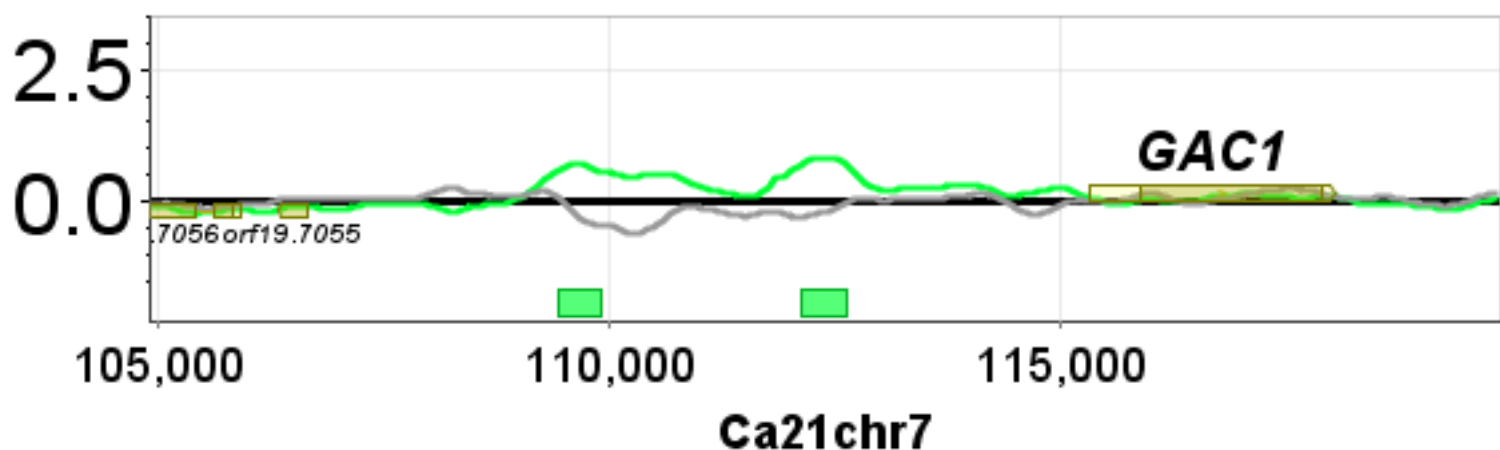

[0.802] Ca21chr7:370939-385938 [+] [ISU1, orf19.6547, ntar\_1096, LPI9, orf19.6550]

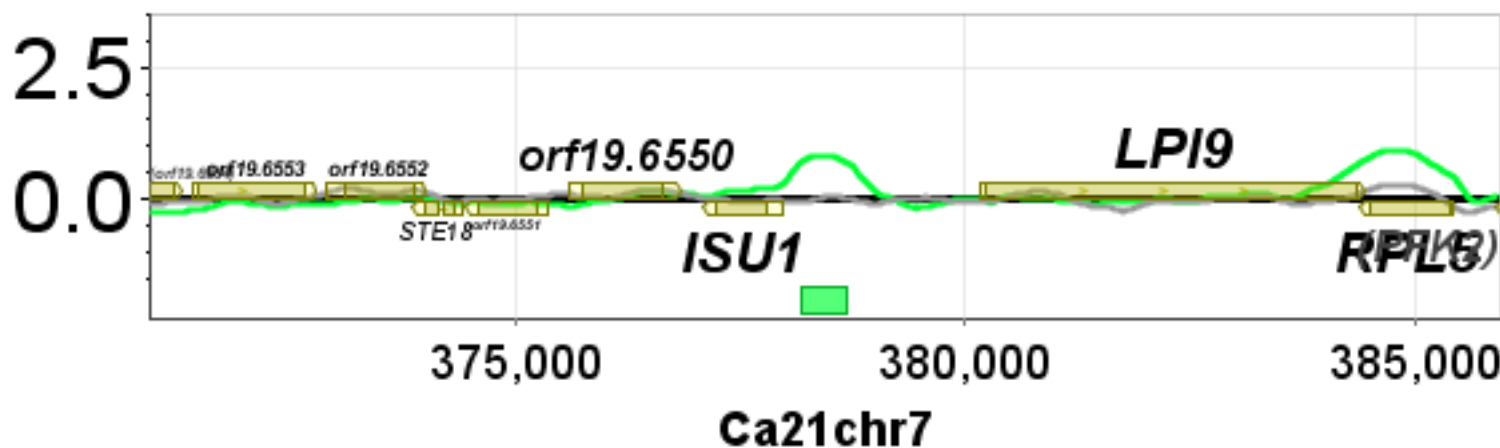

[0.791] Ca21chr1:2093871-2108870 [+] [ntar\_197, orf19.4818, orf19.4819, ntar\_198, RAM2]

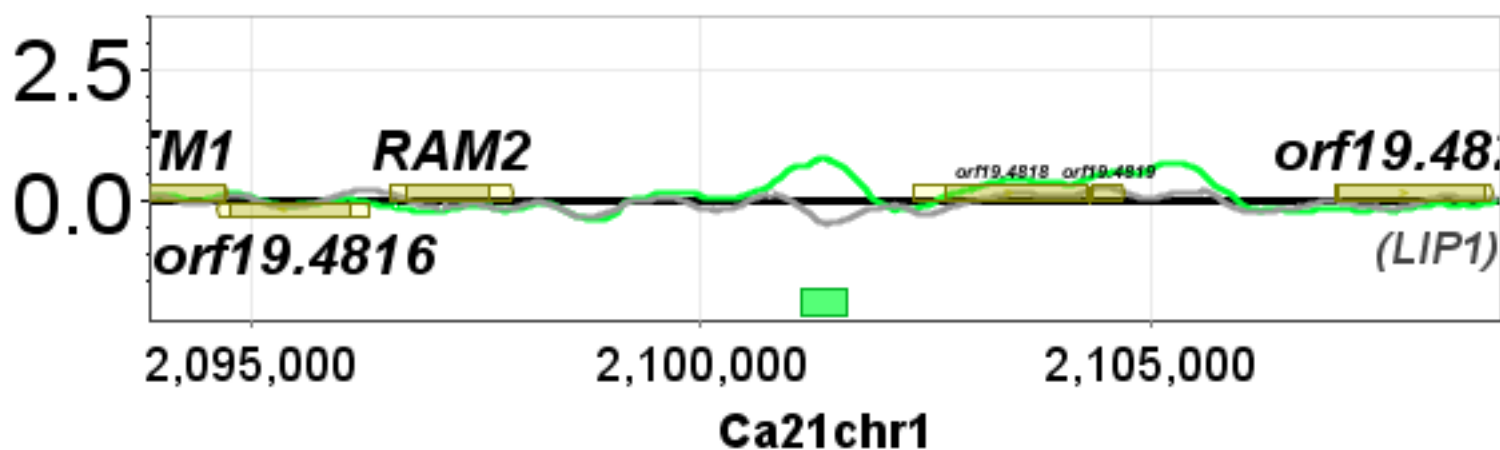



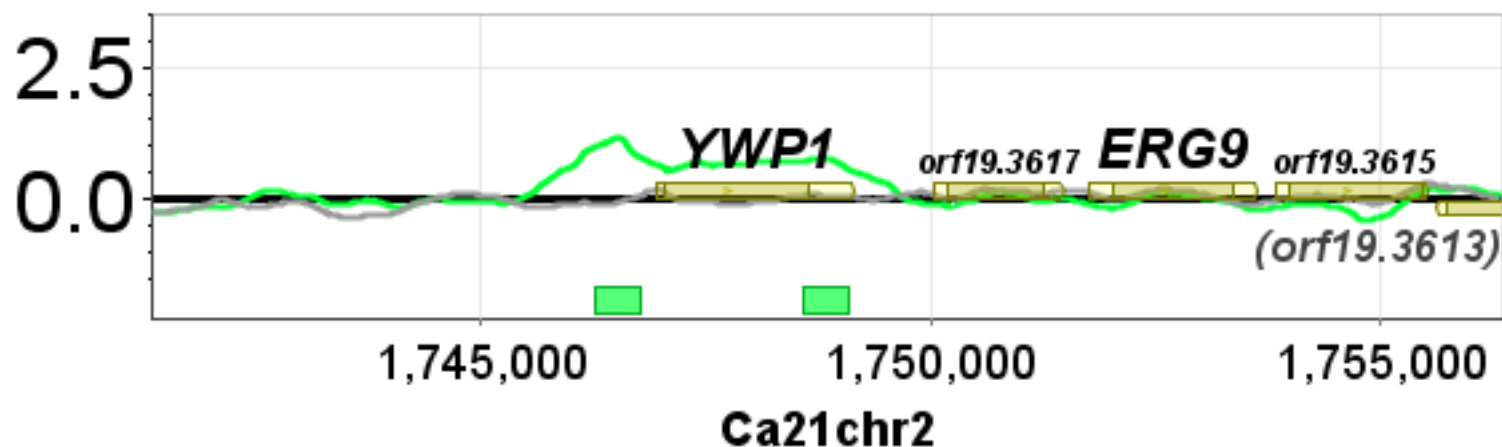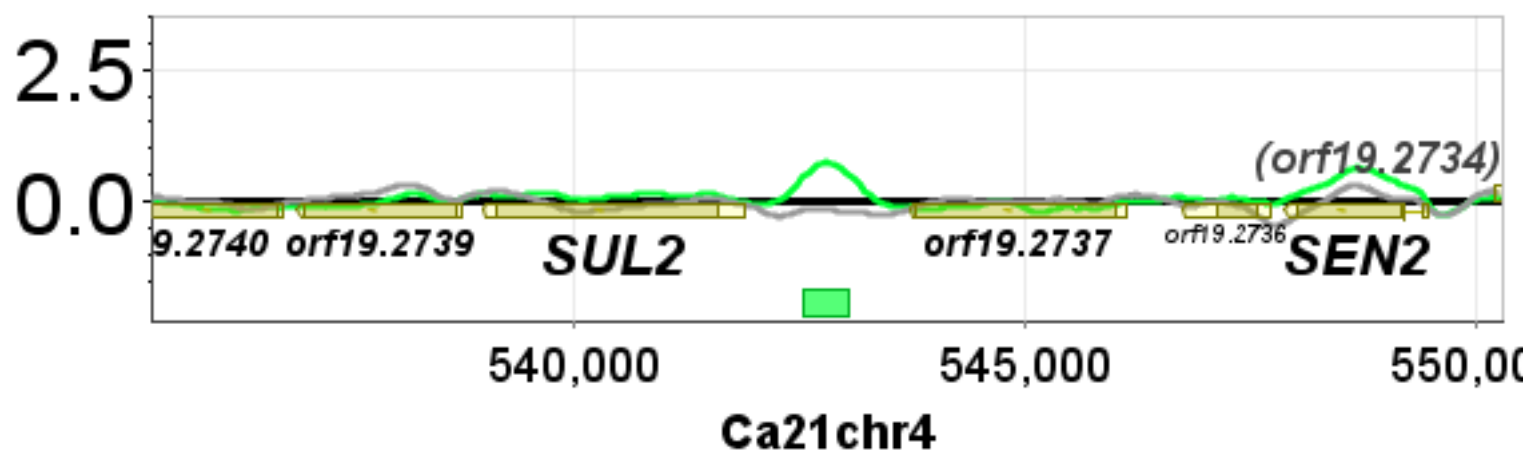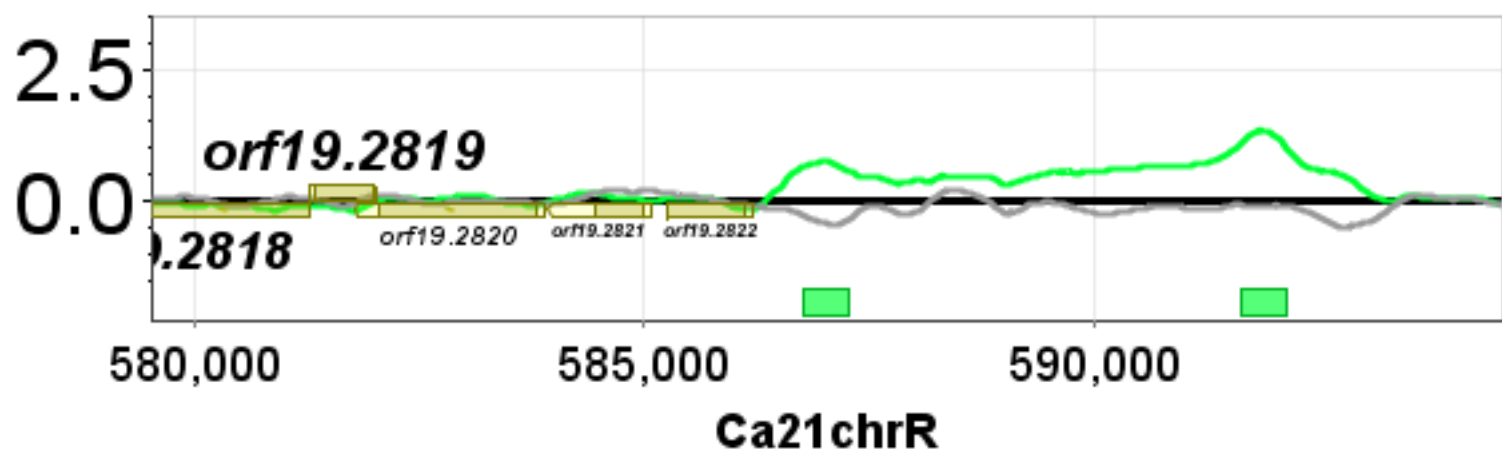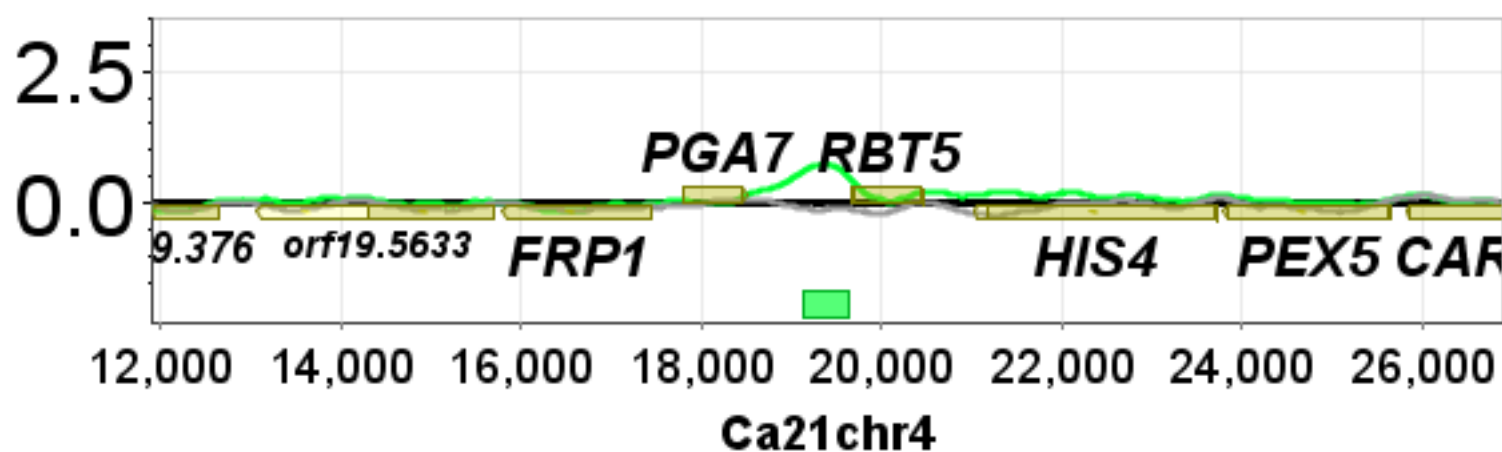

[0.739] Ca21chr2:156848-171847 [+] [HGT7, orf19.2024, ntar\_296, HGT8, orf19.2025]

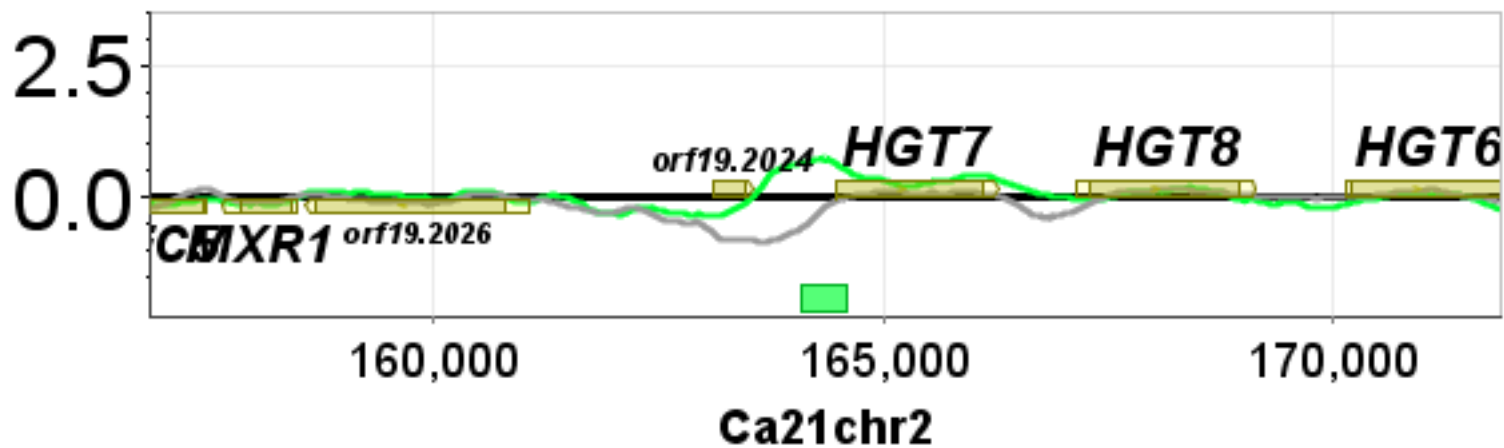

[0.736] Ca21chr1:1982241-1997240 [+] [IPT1, orf19.4768, orf19.4767, ntar\_186, orf19.4766]

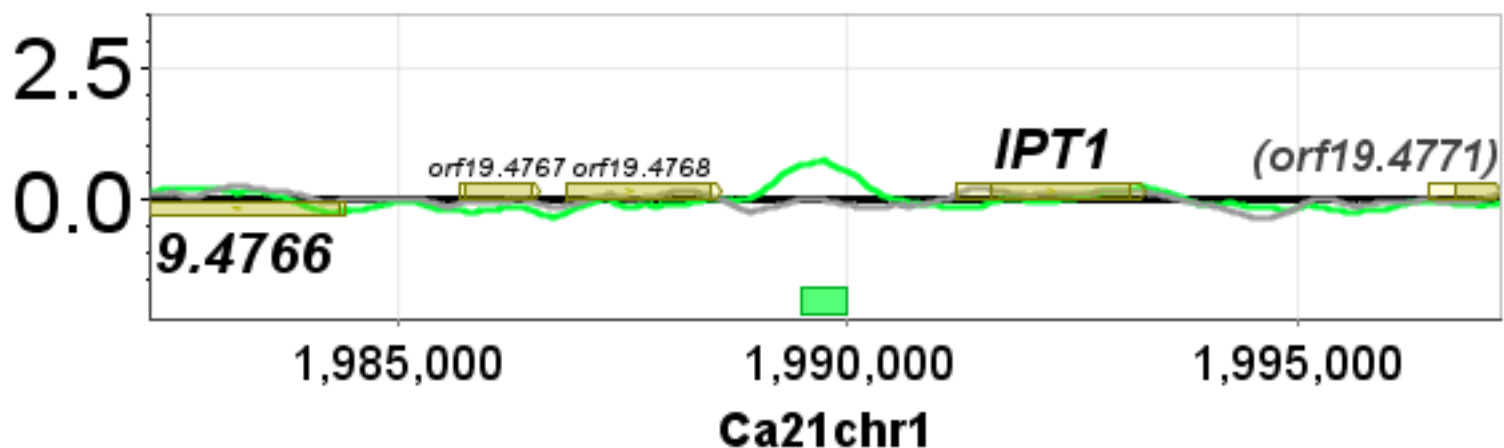

[0.736] Ca21chr4:560002-575001 [+] [orf19.2725, orf19.2724, orf19.2726, ntar\_770]

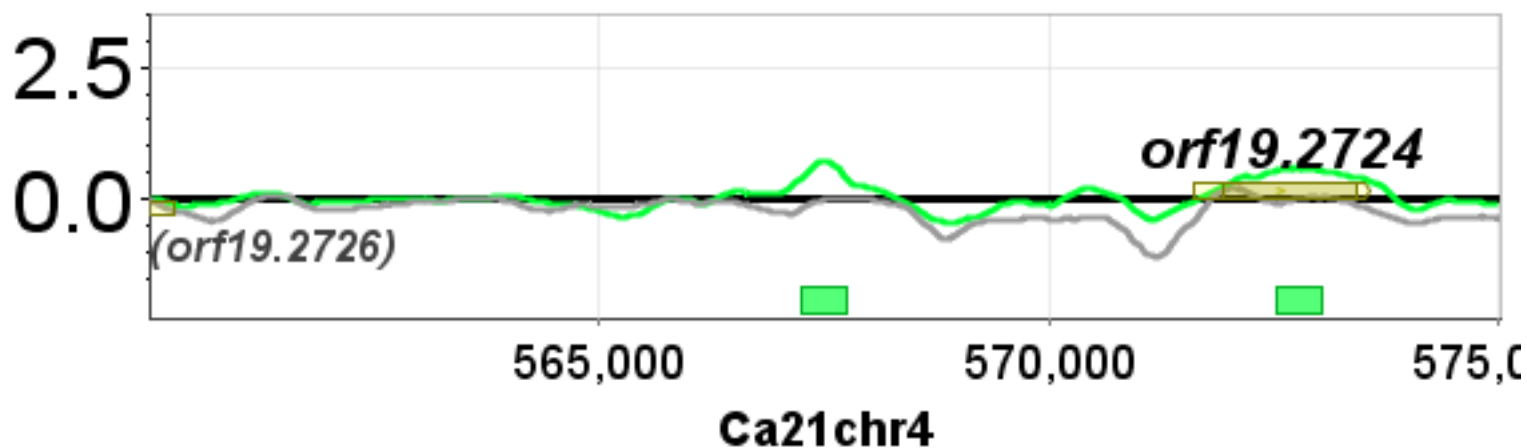

[0.729] Ca21chr3:1465690-1480689 [+] [ntar\_658, th(gug)3, ntar\_659, AAF1, GLG2]

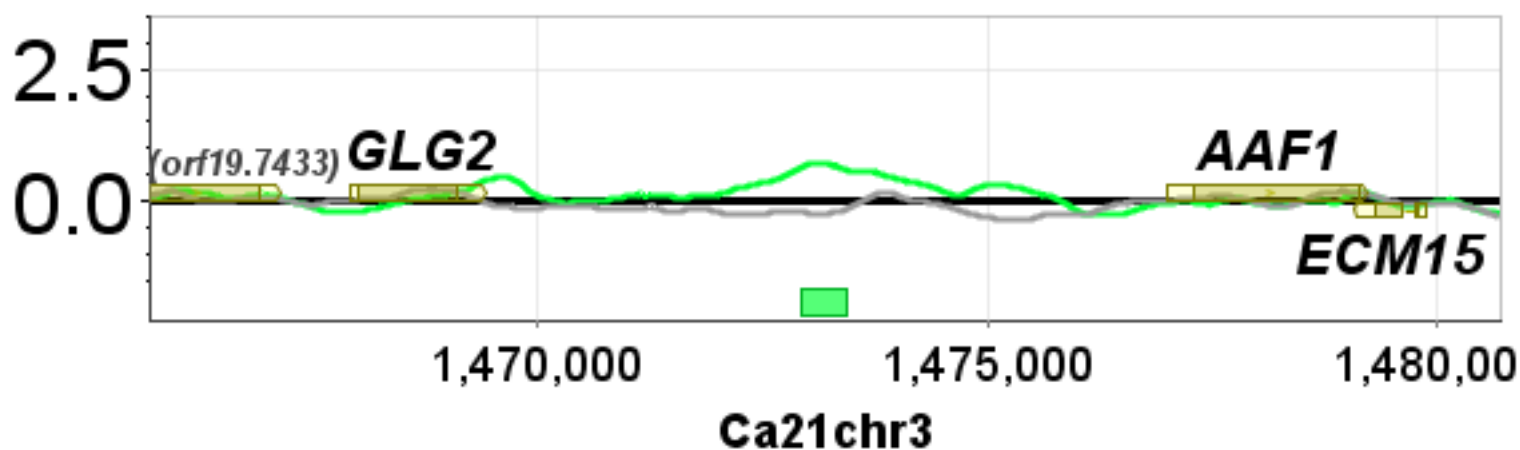

[0.718] Ca21chr1:1348891-1363890 [+] [PBR1, orf19.6275, orf19.6273, orf19.6272, orf19.6276]

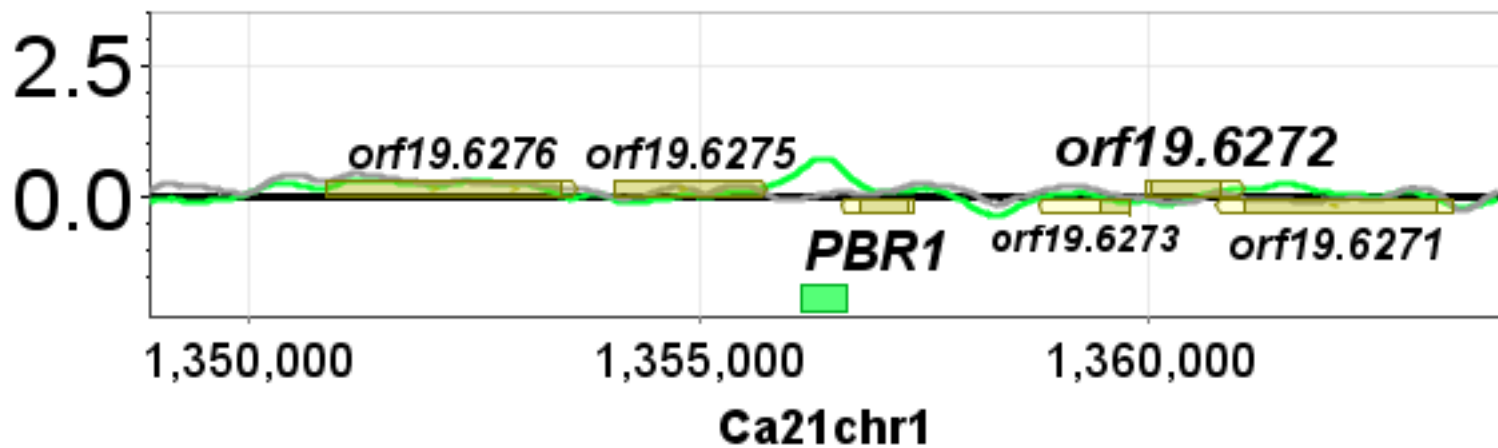

[0.709] Ca21chr2:196827-211826 [+] [ntar\_303, orf19.2002, HNM1, orf19.2001, ntar\_302]

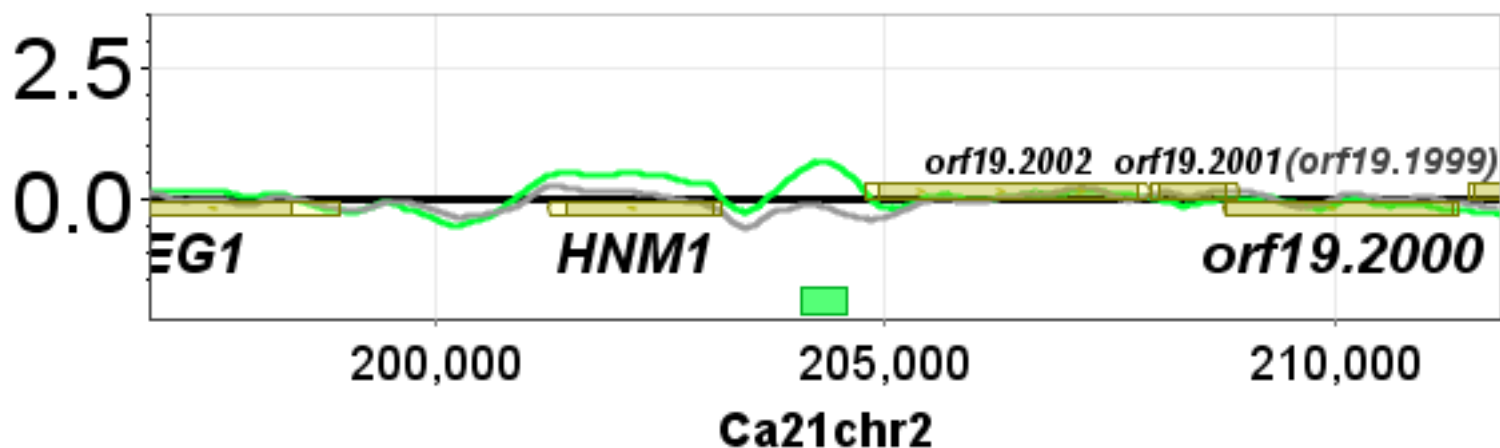

[0.705] Ca21chr7:102171-117170 [+] [ntar\_1413, orf19.7055, orf19.7056, orf19.7054, GAC1]

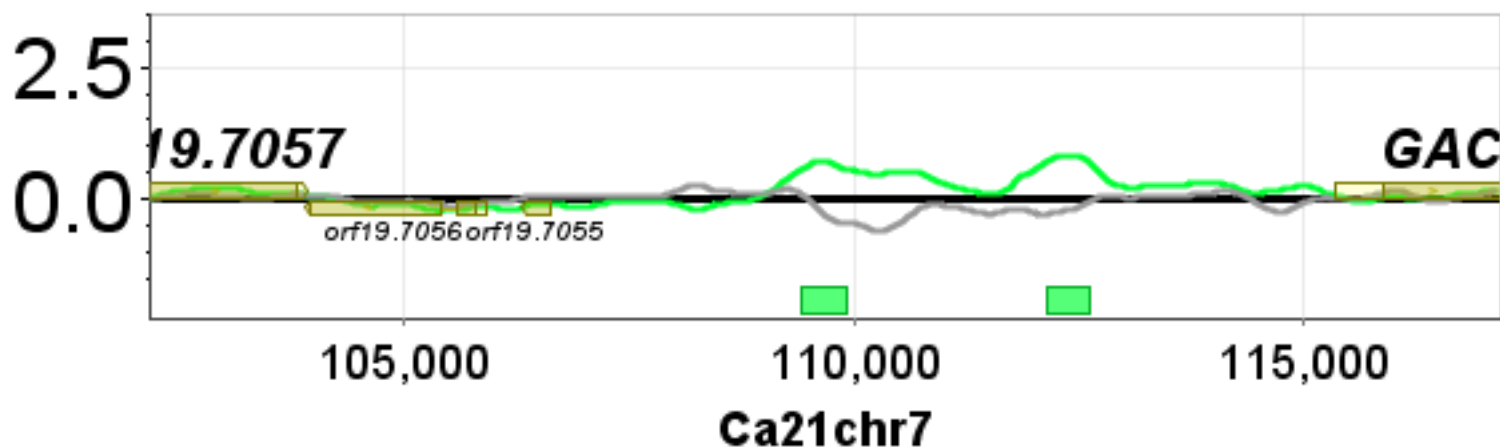

[0.695] Ca21chr3:1404972-1419971 [+] [ALS6, MMS21, ntar\_654, TSA1, MUB1]

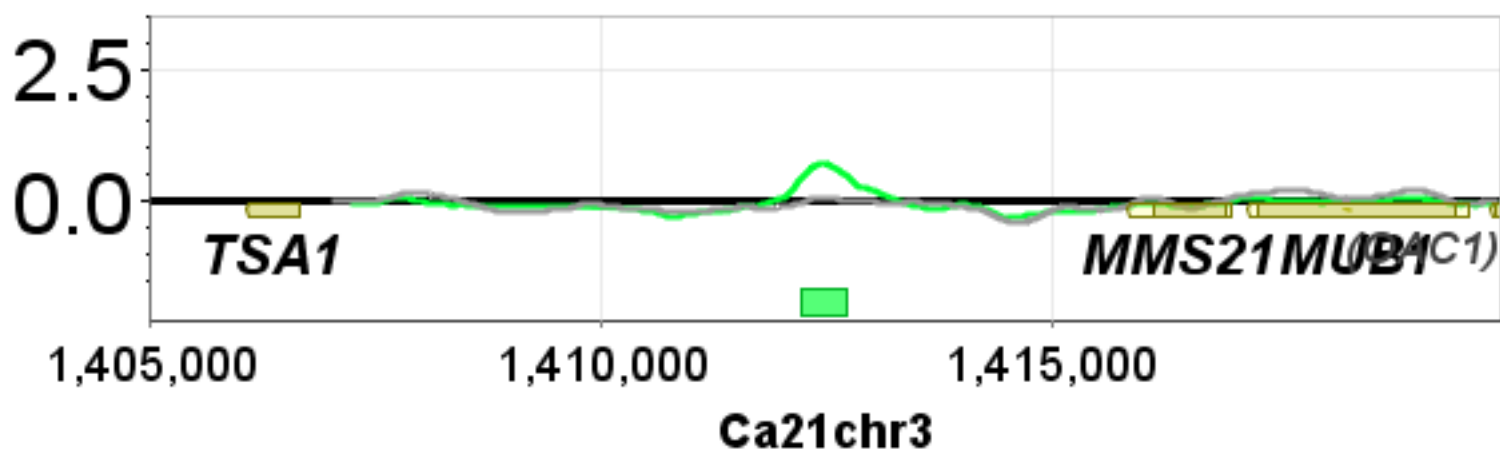

[0.693] Ca21chr4:207505-222504 [+] [HGT17, RAT1, MLP1, RPL40B, orf19.4680]

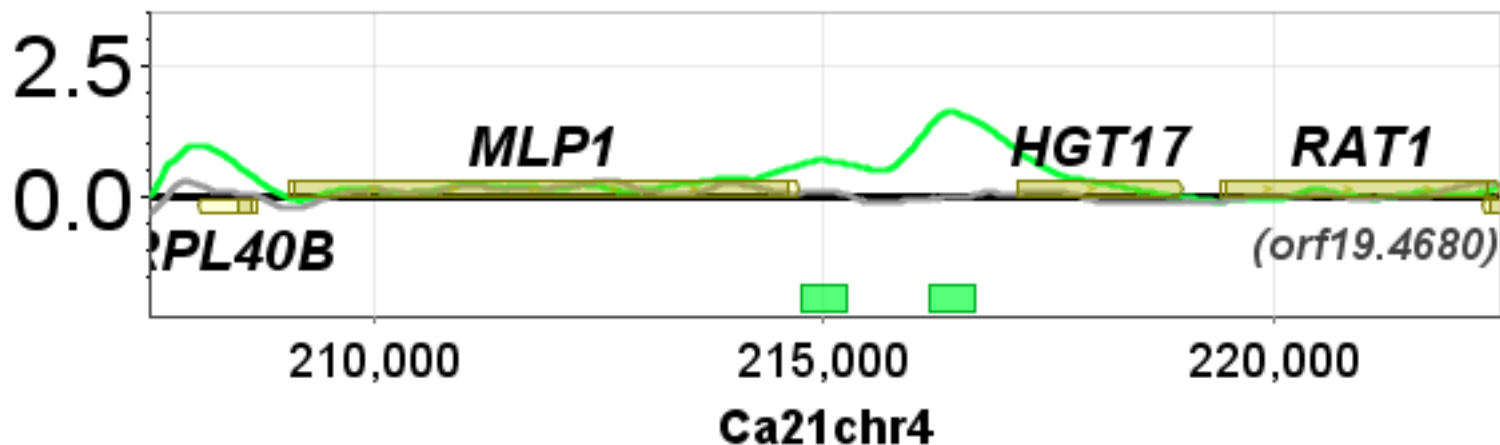

[0.674] Ca21chrR:2051381-2066380 [+] [RTA4, ntar\_1390, PLB3, ntar\_1389, orf19.6596]

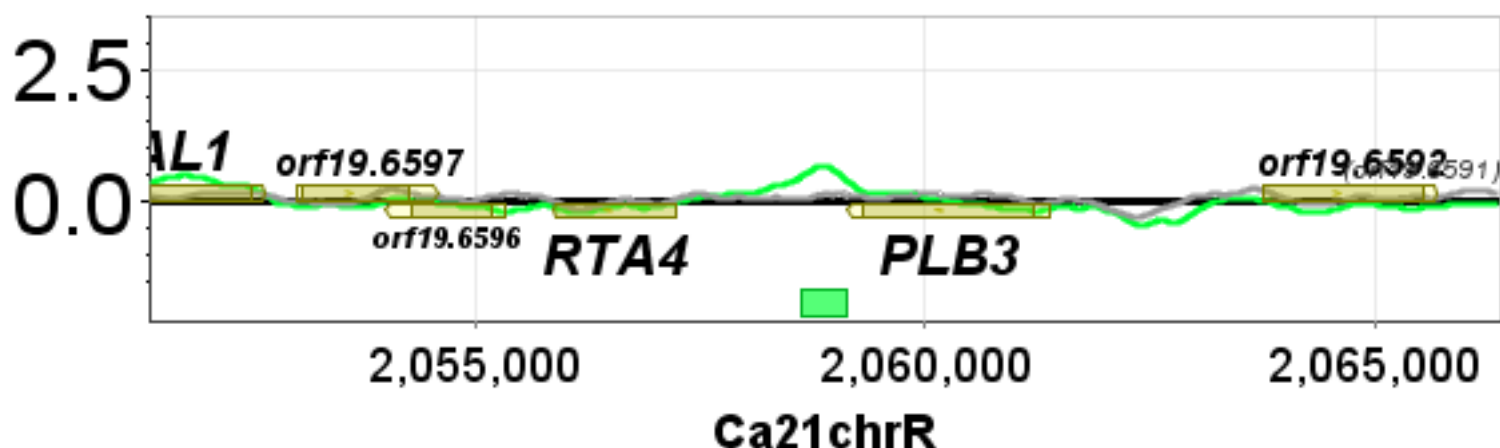

[0.667] Ca21chrR:1712301-1727300 [+] [ntar\_1352, ntar\_1353, ntar\_1351, EFG1, tg(gcc)1]

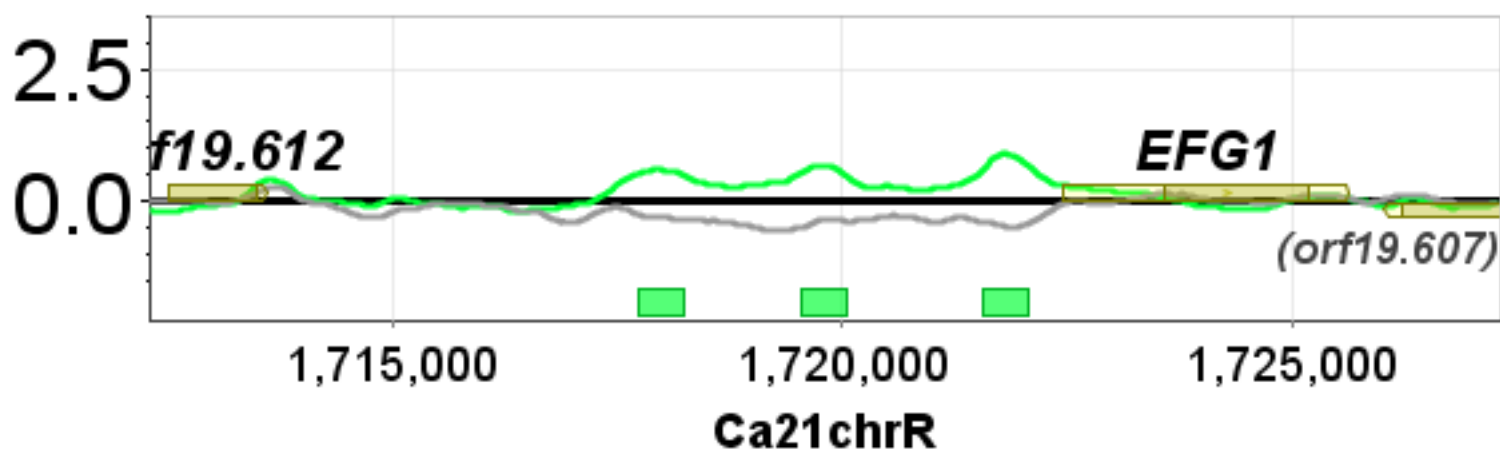

[0.651] Ca21chr1:2217053-2232052 [+] [ntar\_207, WOR1, orf19.4883, ntar\_206, orf19.4882]

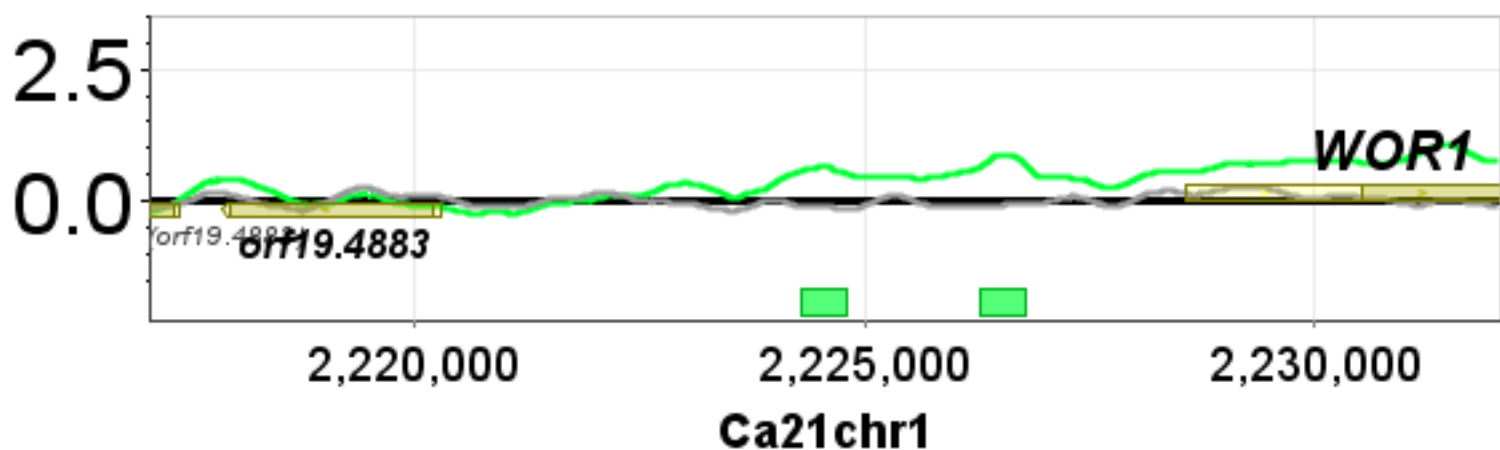

[0.651] Ca21chrR:1487407-1502406 [+] [orf19.2367, orf19.2368, orf19.2366, orf19.2369, ATX1]

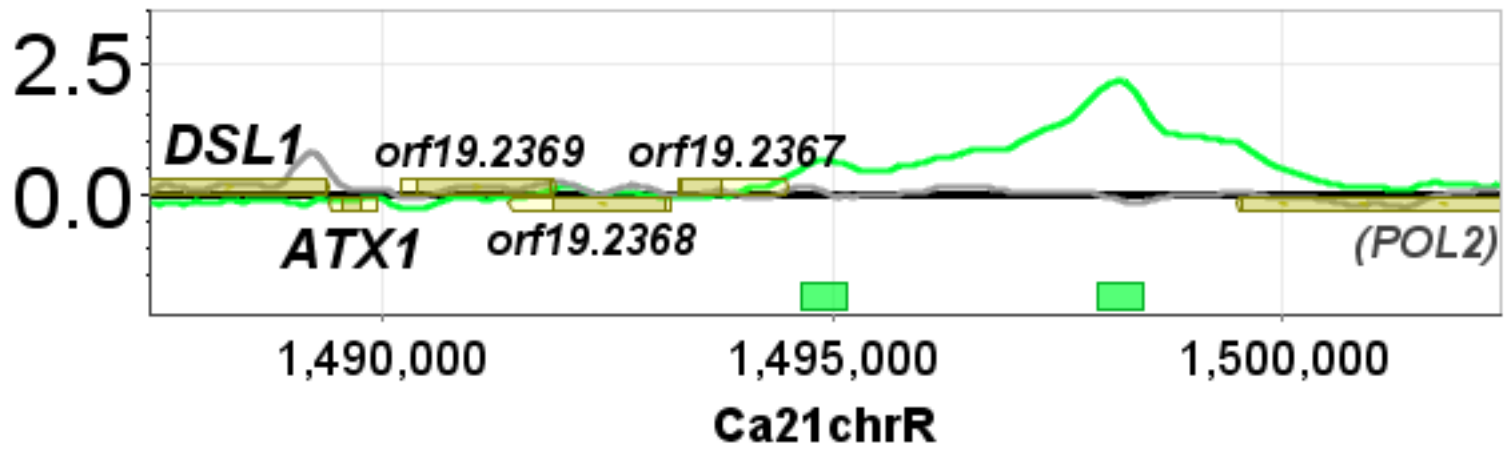

[0.642] Ca21chrR:599367-614366 [+] [ntar\_1220, ntar\_1219, orf19.2825, ntar\_1222, ntar\_1221]

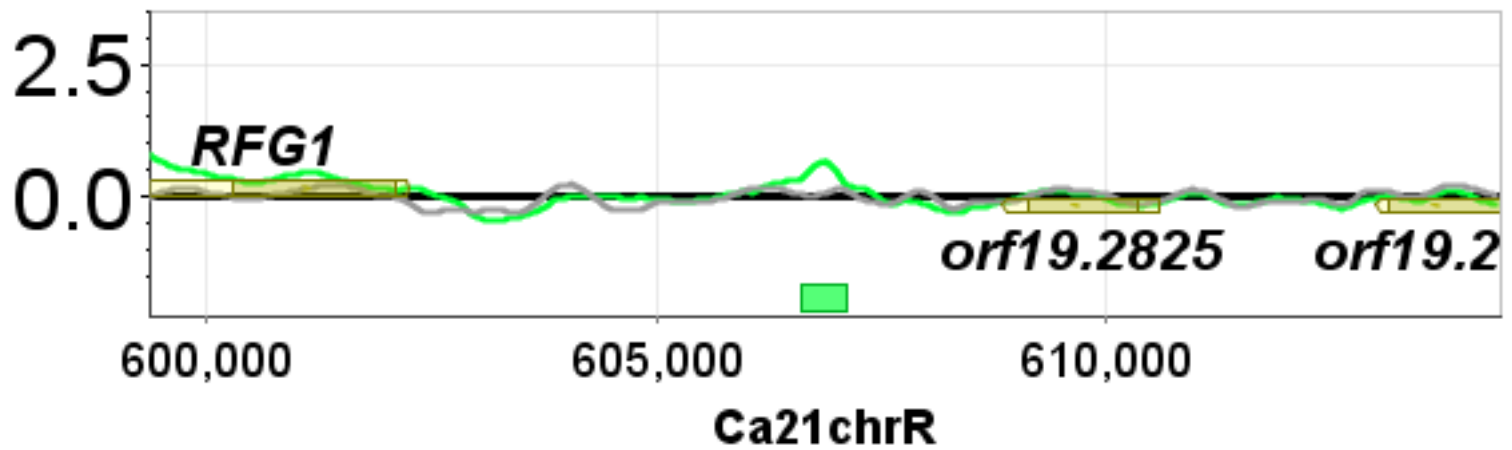

[0.639] Ca21chr4:271145-286144 [+] [PGA53, ntar\_735, ntar\_734, ILV6, ntar\_733]

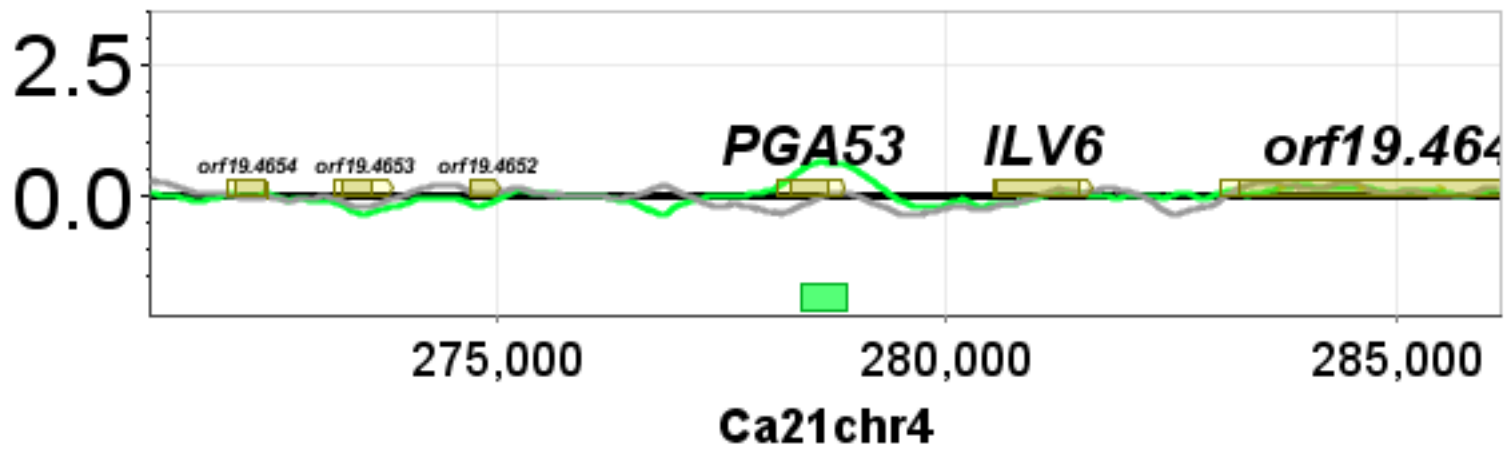

[0.621] Ca21chr2:728284-743283 [+] [ntar\_353, ntar\_354, ADAEC, orf19.871]

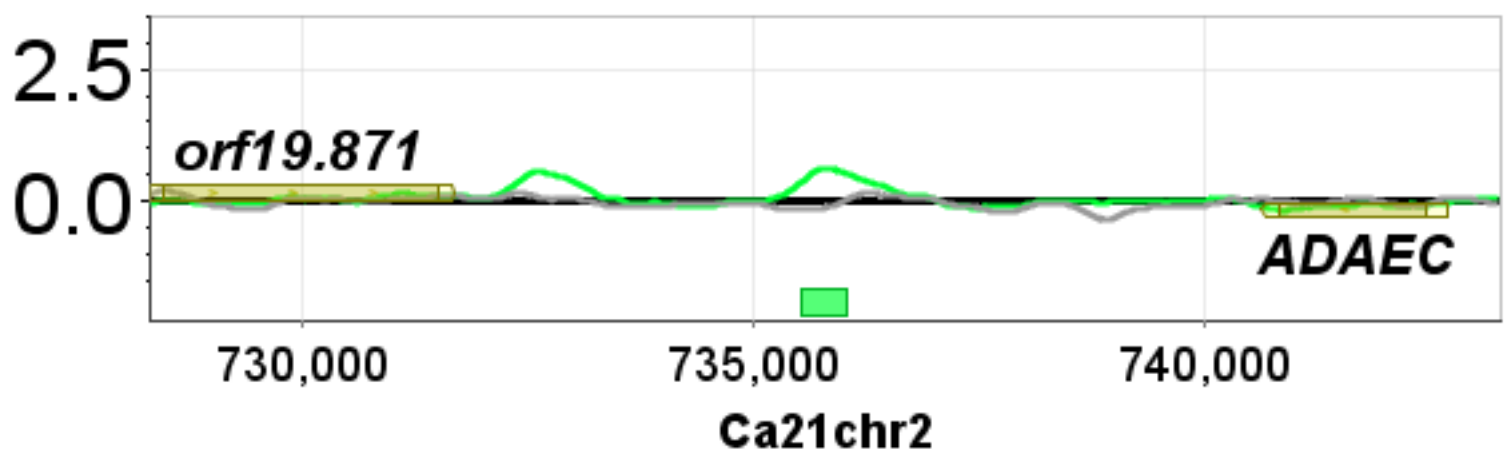

[0.621] Ca21chrR:1471733-1486732 [+] [orf19.1842, ALG6, ntar\_1329, ts(aga)2, orf19.1841]

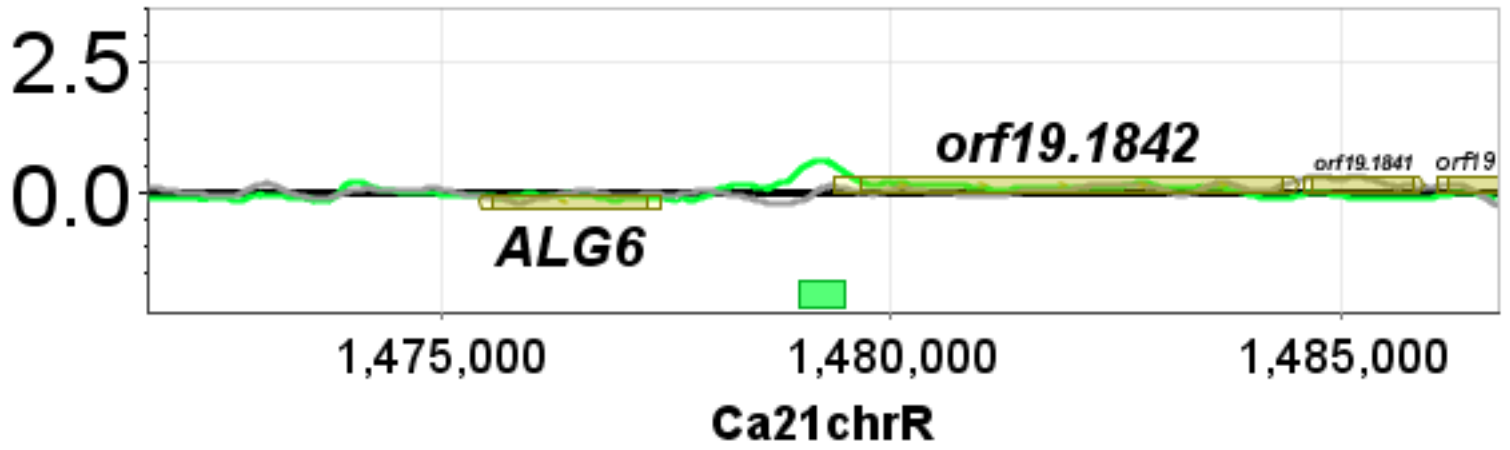

[0.62] Ca21chr1:2615499-2630498 [+] [orf19.5267, ntar\_246, orf19.5268, orf19.5269, orf19.5266]

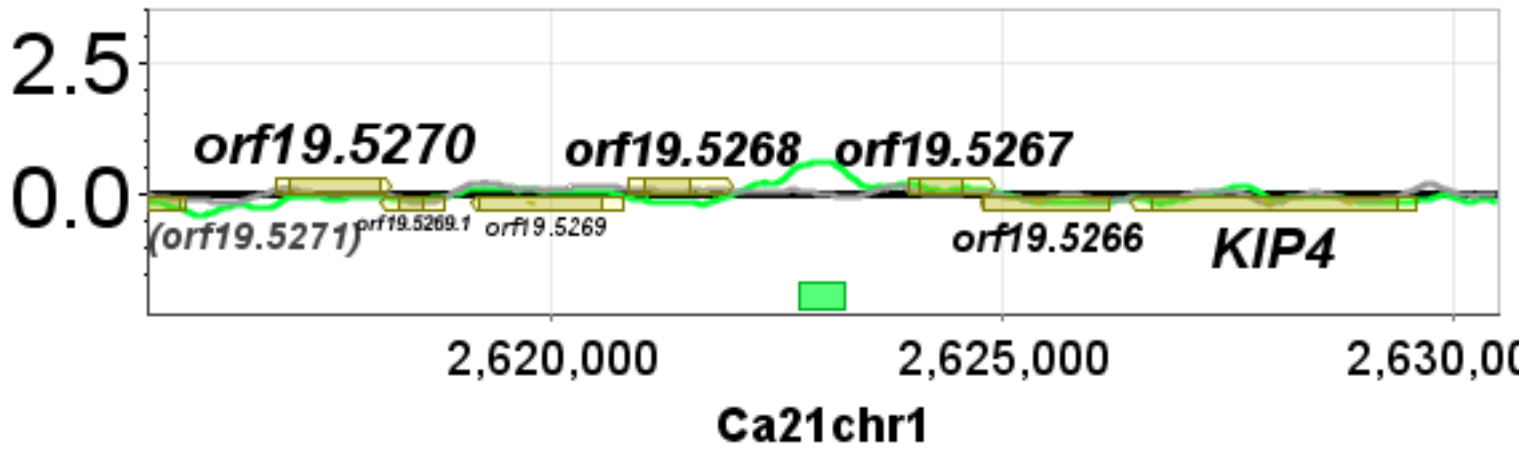

[0.614] Ca21chr3:1115673-1130672 [+] [ntar\_617, ntar\_616, ntar\_615, ntar\_614, ntar\_618]

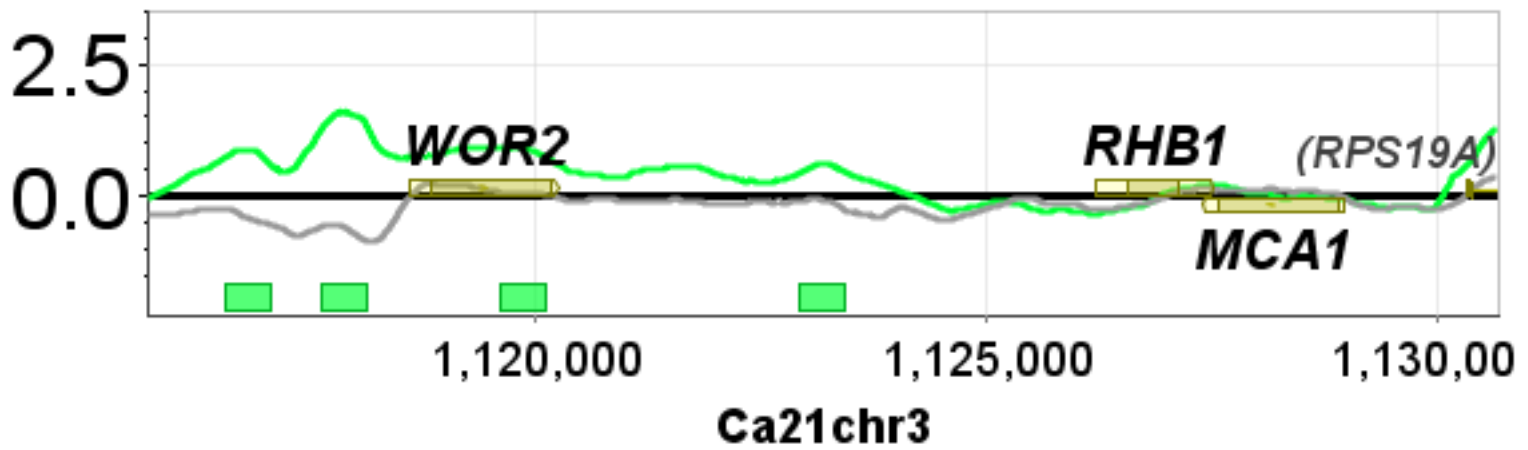

[0.61] Ca21chr7:904863-919862 [+] [ntar\_1151, ntar\_1152, orf19.7151, ntar\_1153, orf19.7152]

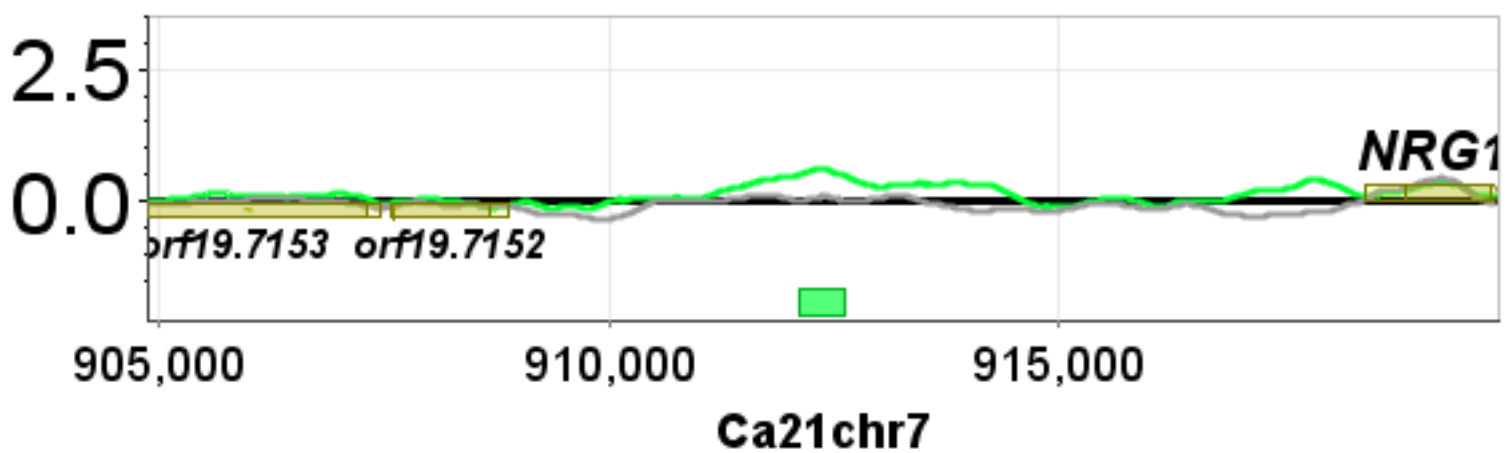

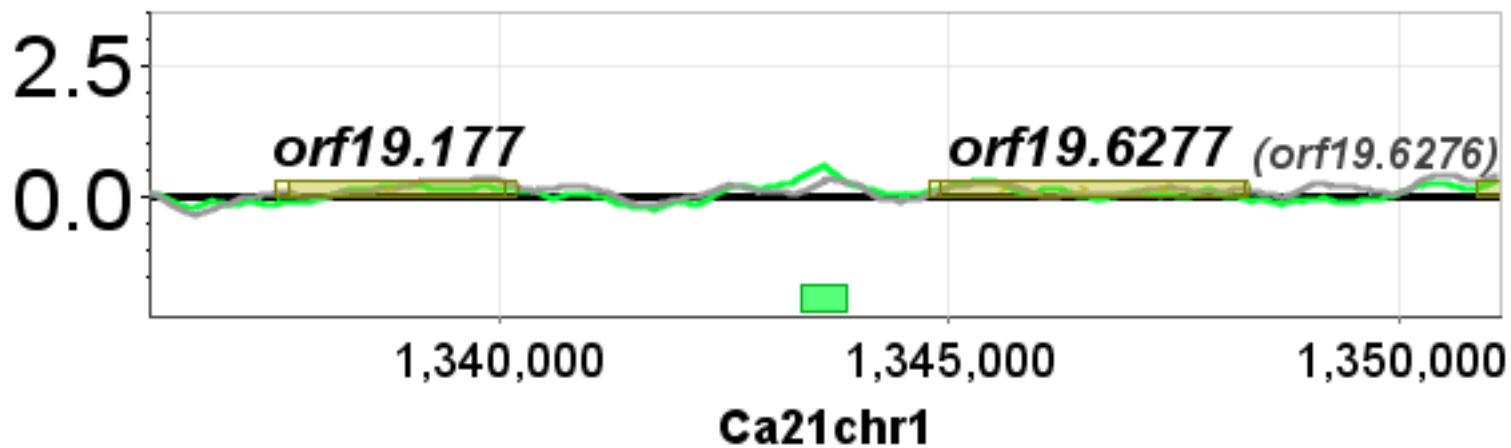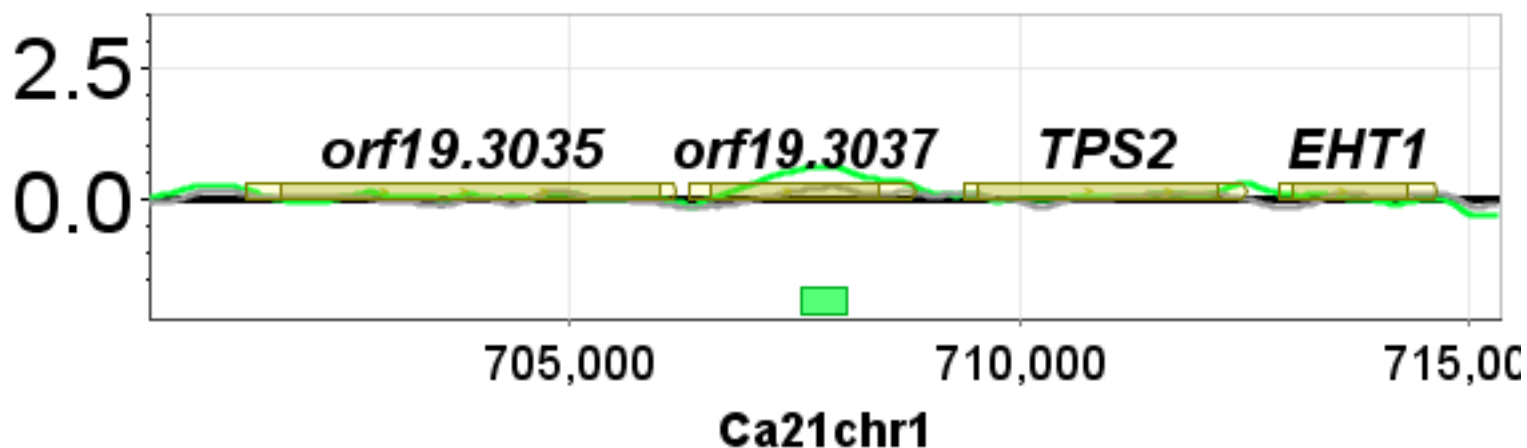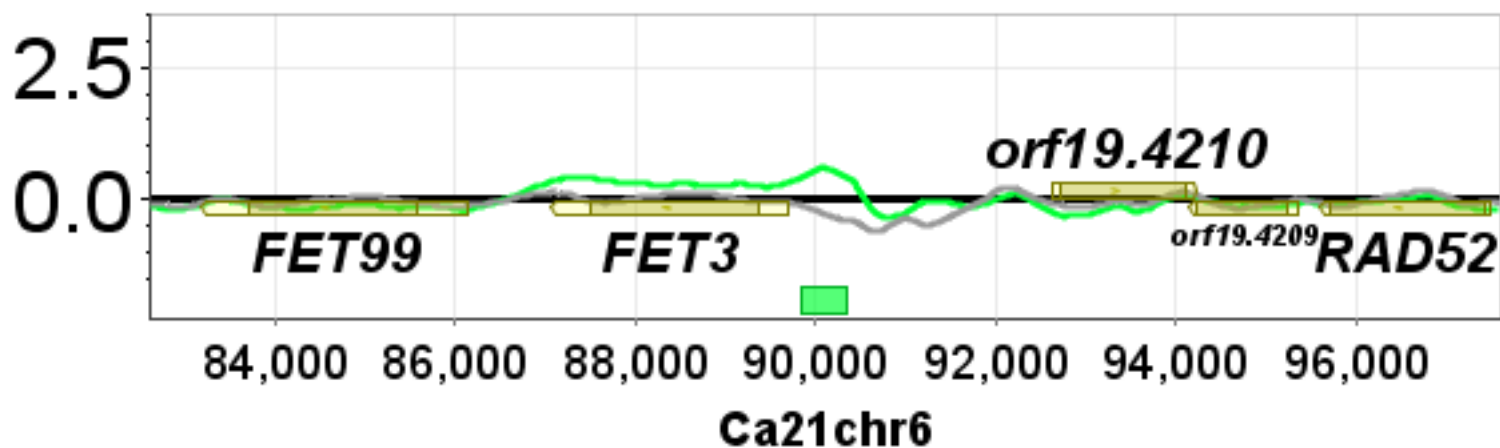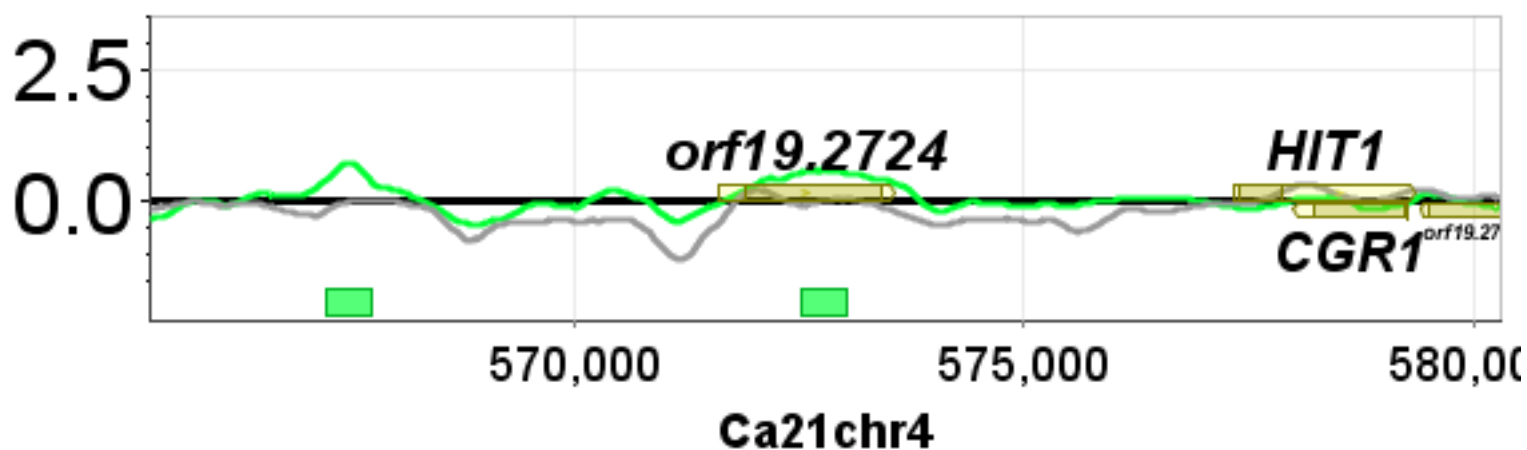

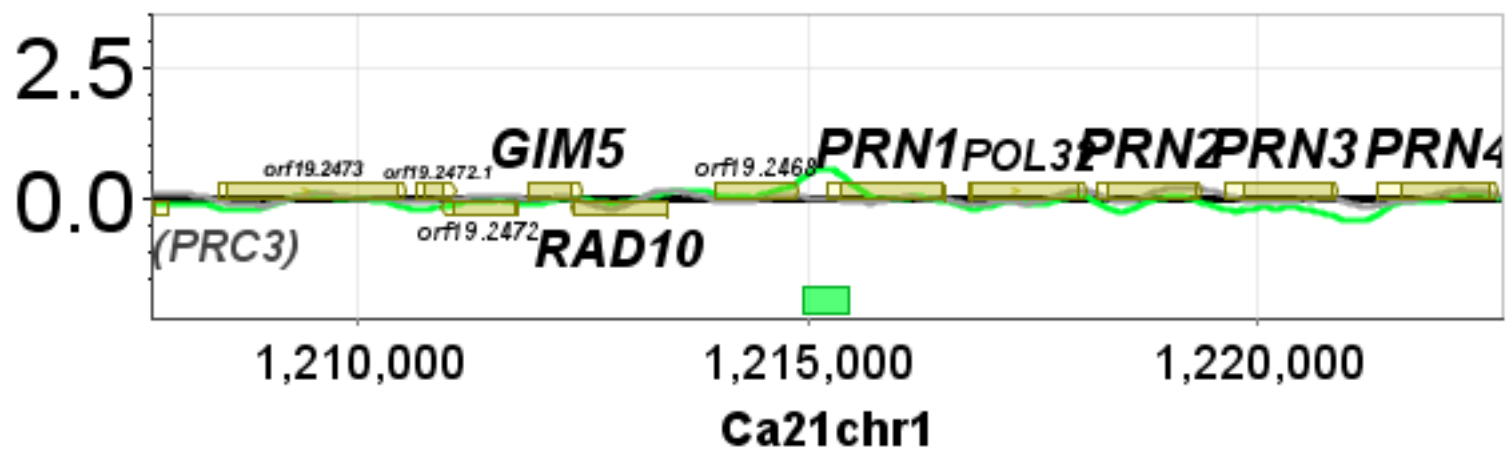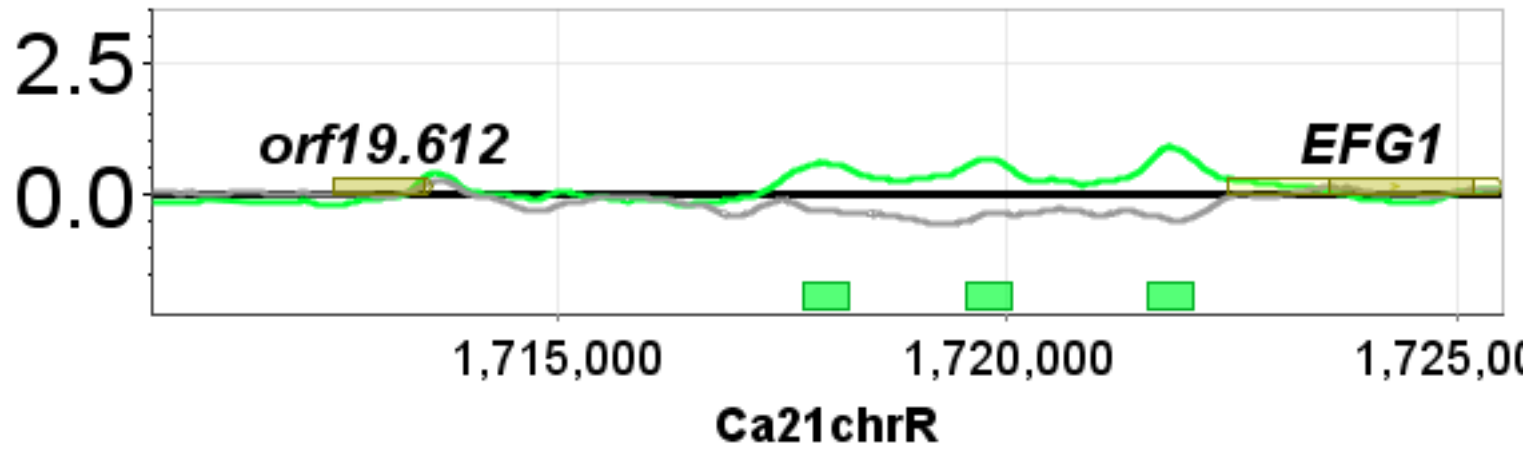



## **Full genome chromatin immunoprecipitation (ChIP-chip) mapping of Efg1 binding sites in opaque cells.**

Plots of 15kb regions centered on the set of 239 Efg1 binding sites in opaque cells.

Smoothed enrichment data for the wild type strain is shown in blue, for the *efg1* deletion strain in grey. The 500bp called peaks of Efg1 enrichment are indicated by the blue boxes in the lower track in each image. Peaks are arranged in order of decreasing Efg1 enrichment. Enrichment ( $\log_2$ ) is indicated on the y-axis. Chromosomal locations and specific enrichment levels for the peak are indicated in the strip above each panel; when multiple peaks are present the enrichment value corresponds to the peak at the center of the plot. Yellow boxes correspond to genes; 5' or 3' untranslated regions are included as lighter shaded portions of the box. Genes plotted above the bold line read in the sense direction; genes plotted below the line read in the antisense direction. Plots produced using the SnapShot Function in MochiView v1.46 (Homann and Johnson, 2010).

[4.895] Ca21chr3:1581804-1596803 [+] [ntar\_667, ntar\_666, orf19.6805, ntar\_665, orf19.6807]

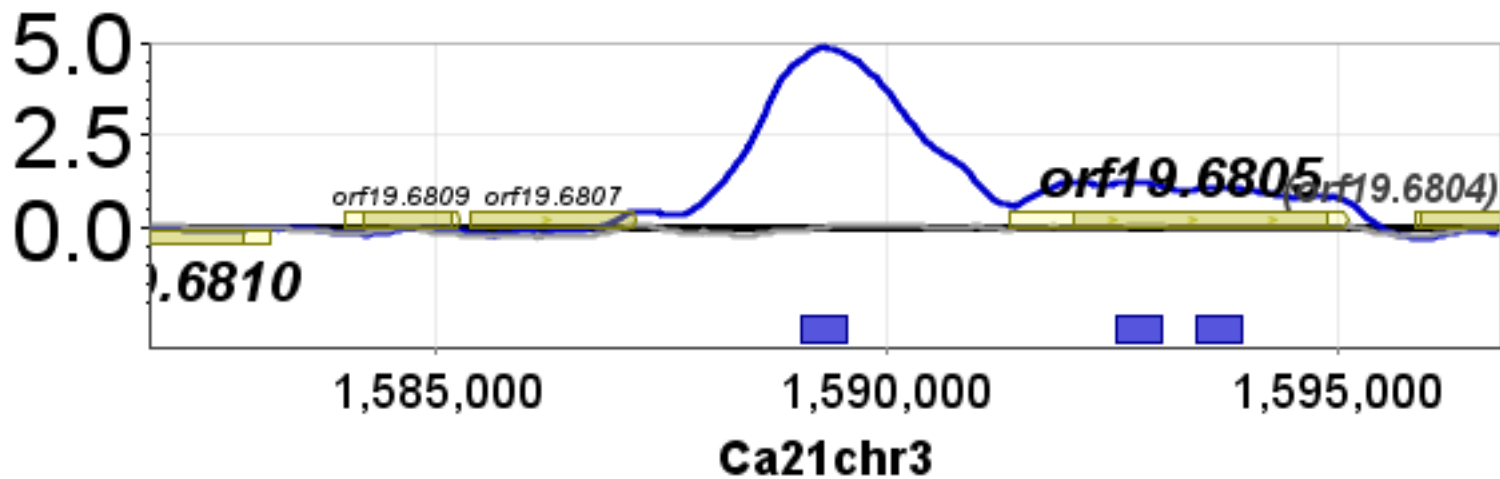

[4.577] Ca21chrR:584326-599325 [+] [orf19.2822, orf19.2821, RFG1]

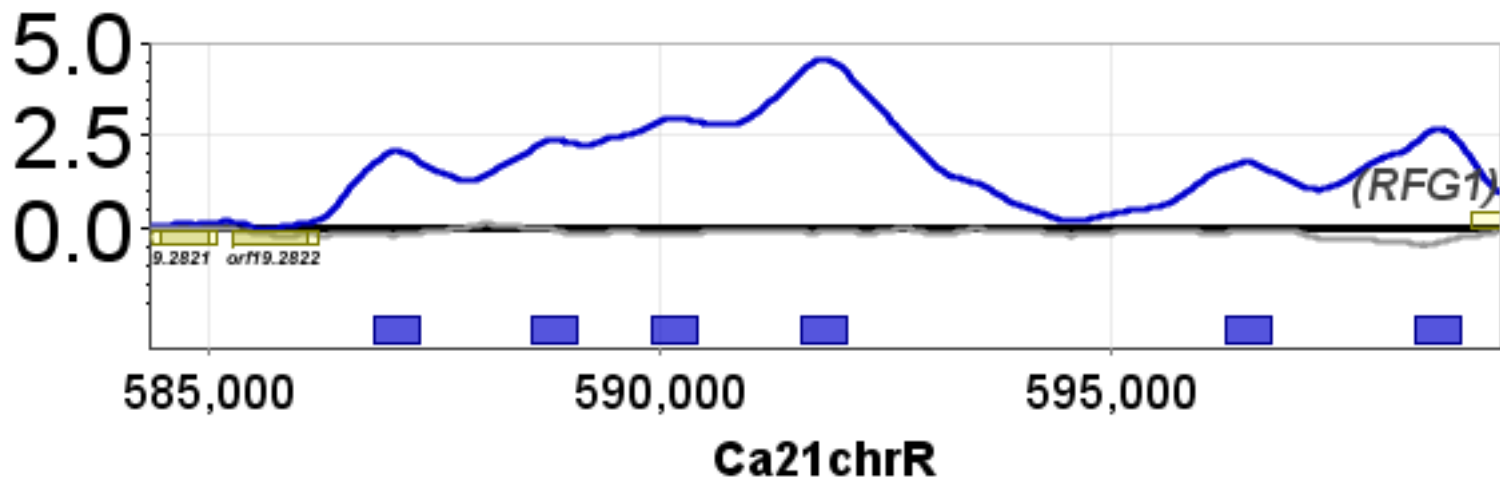

[4.142] Ca21chr1:2219085-2234084 [+] [WOR1, ntar\_207, orf19.4883]

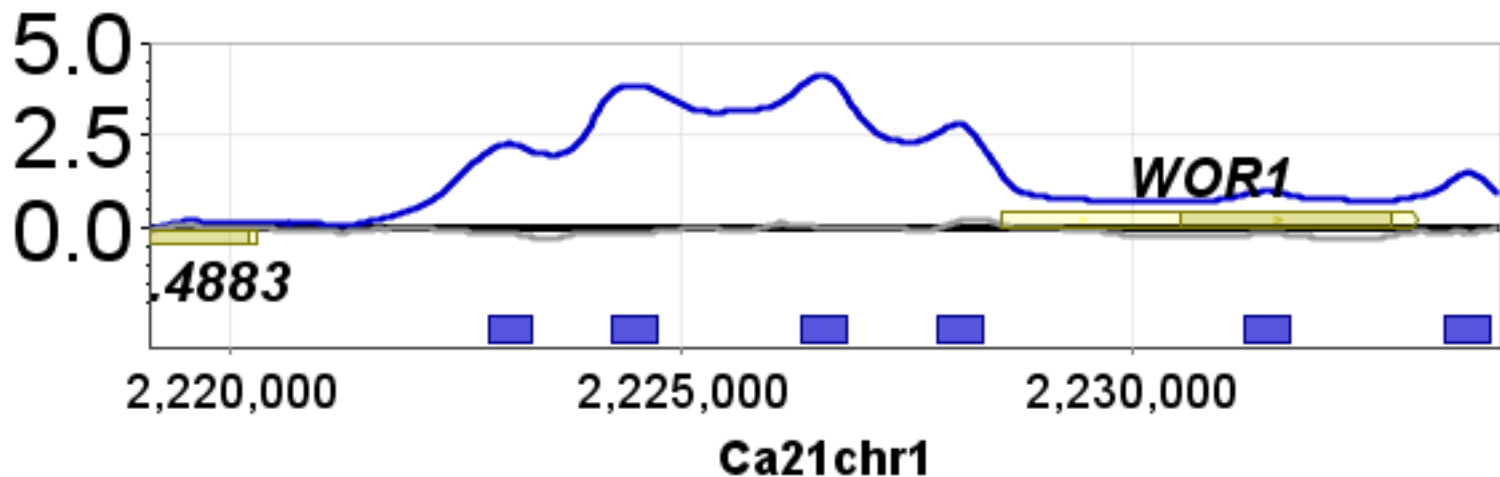

[4.047] Ca21chrR:867281-882280 [+] [orf19.467, IFF9]

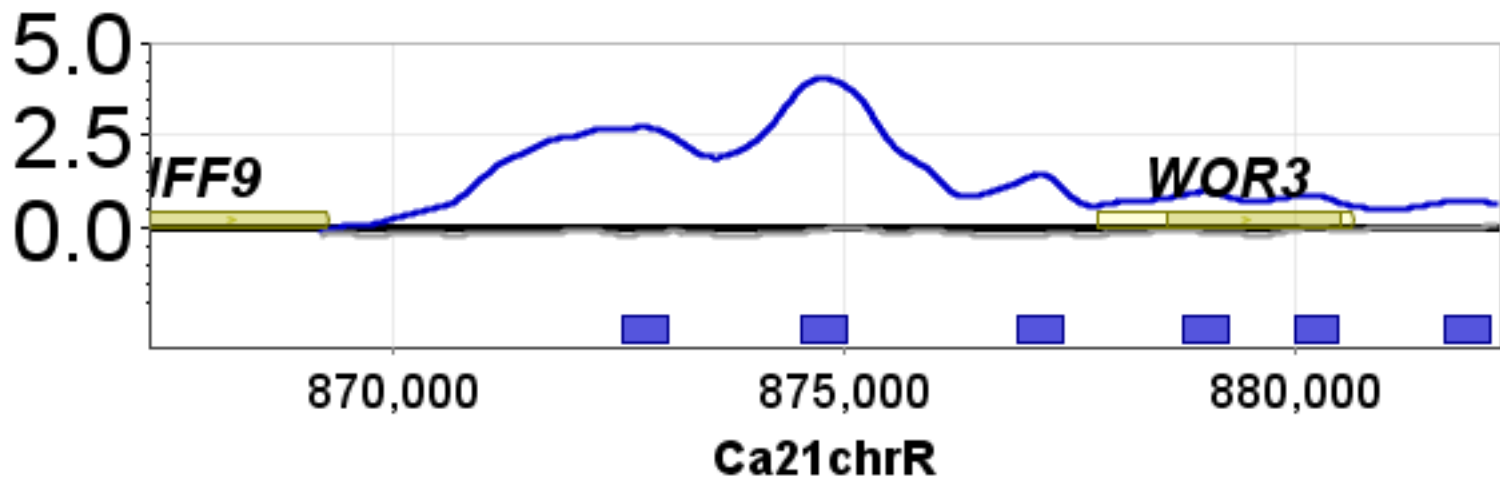

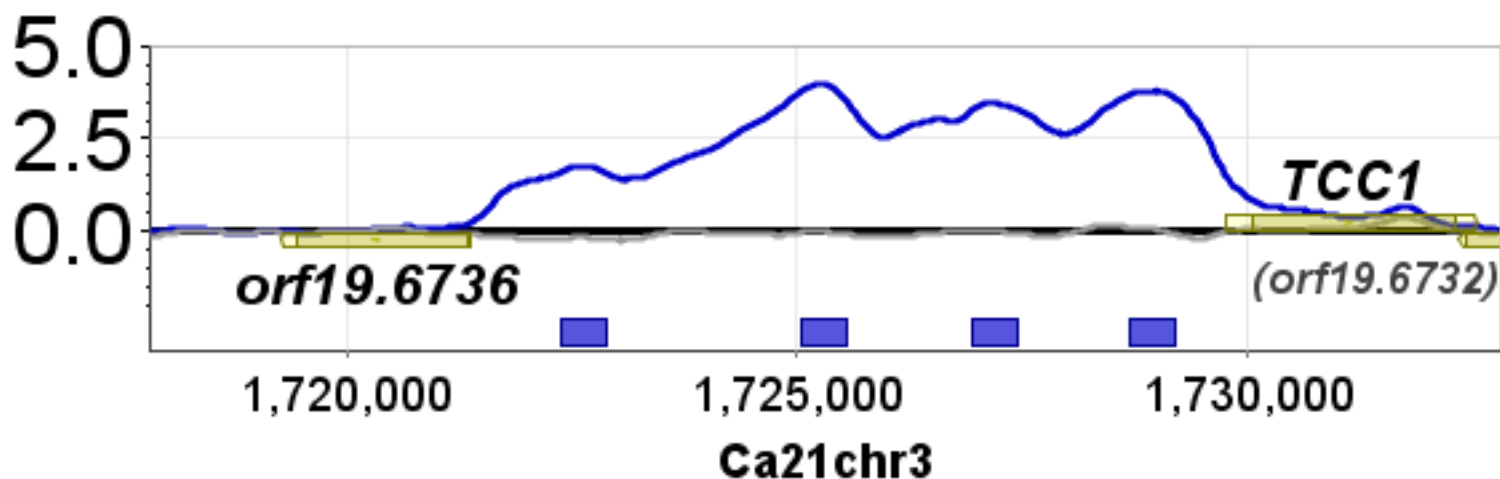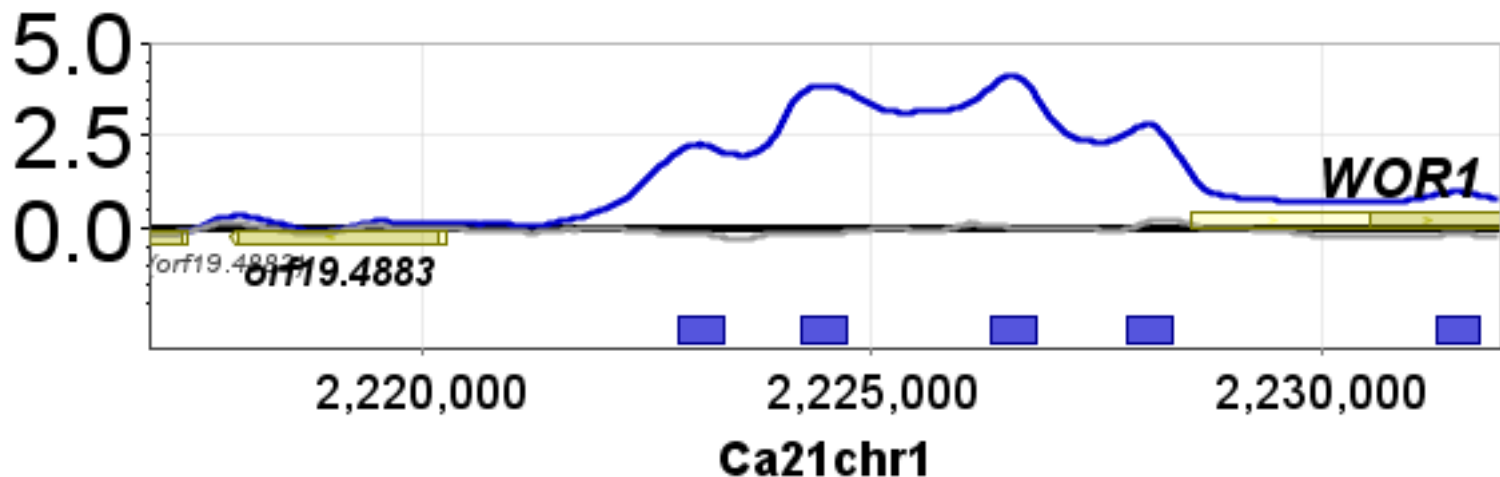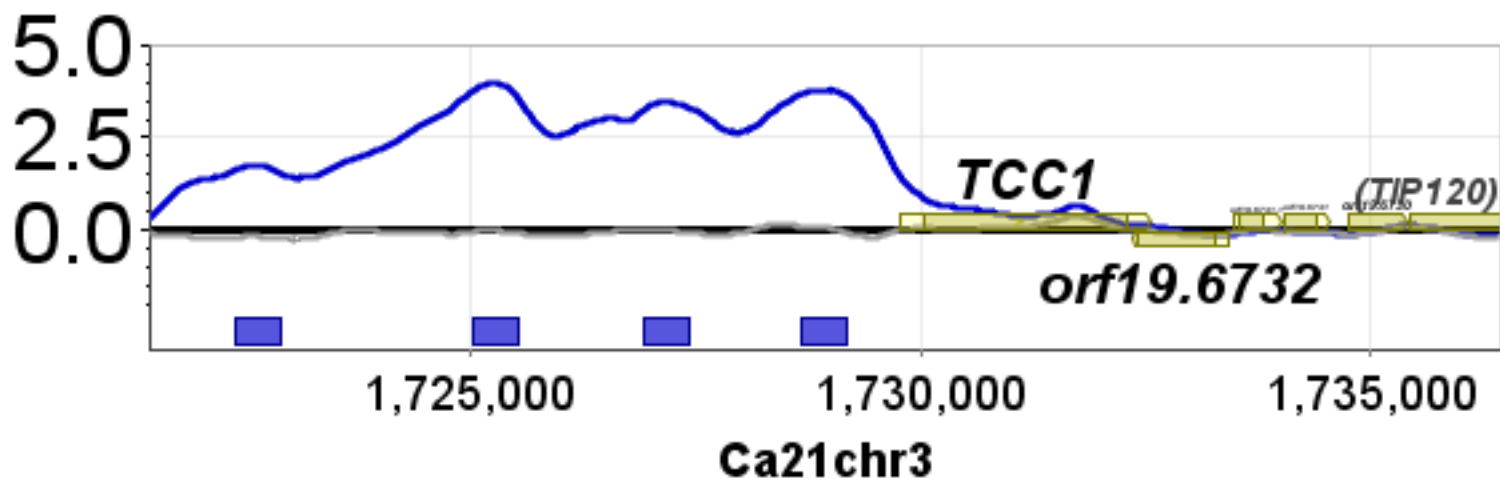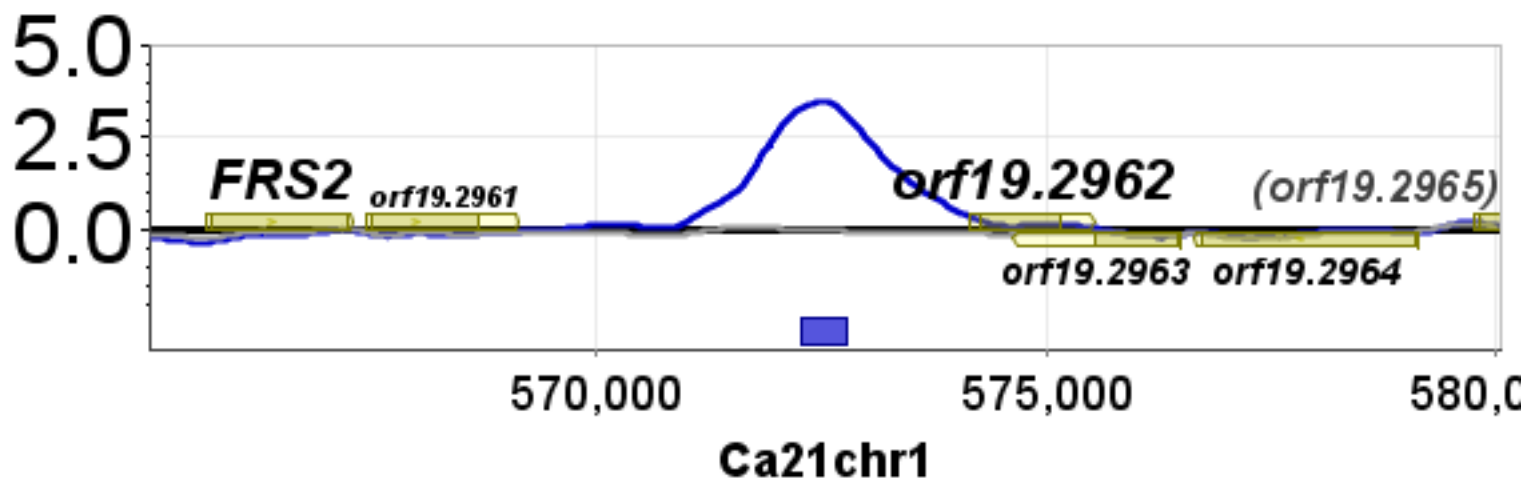

[3.456] Ca21chr3:1719690-1734689 [+] [TCC1, orf19.6736, orf19.6732, orf19.6731.1, orf19.6731]

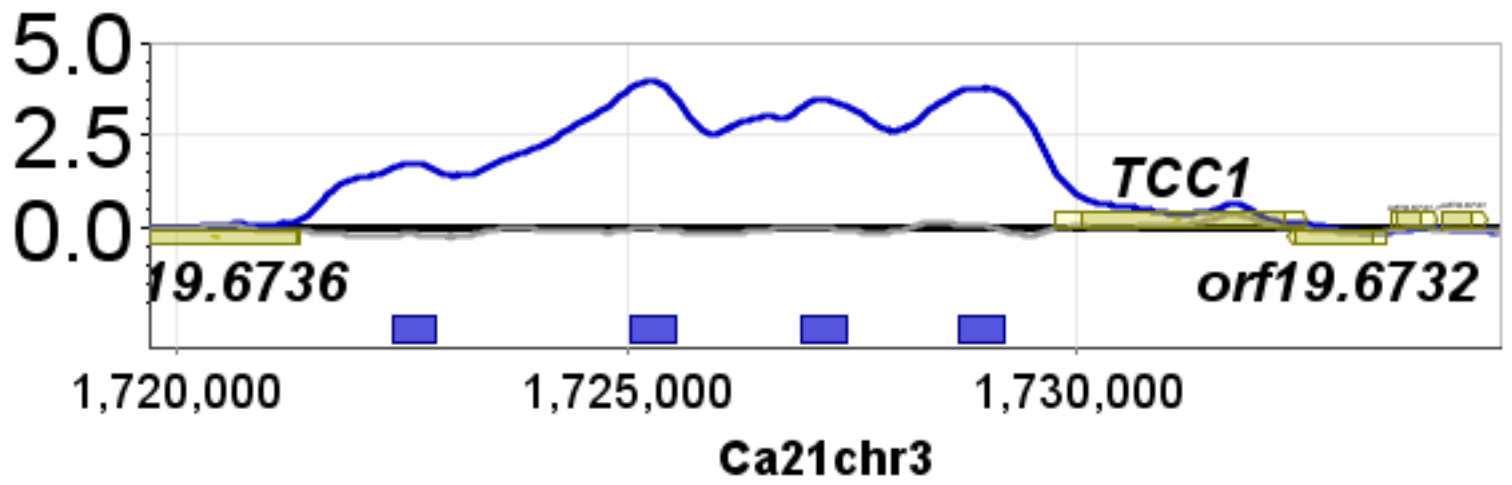

[3.355] Ca21chr1:286611-301610 [+] [orf19.3336, orf19.3335, ntar\_28, RPS21, orf19.3337]

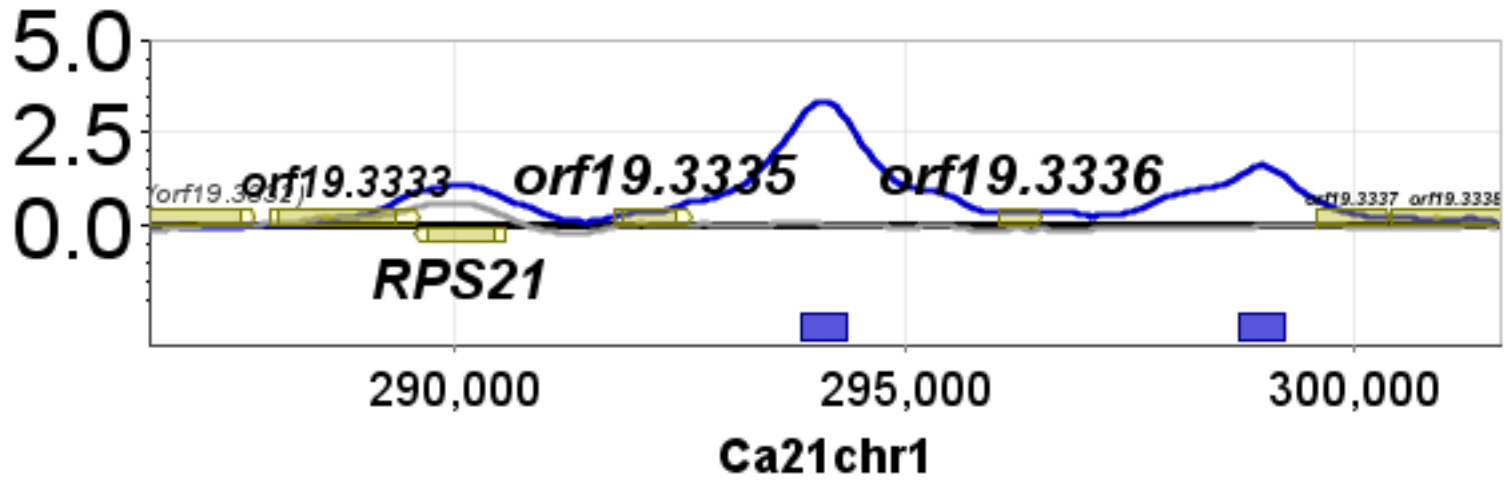

[3.277] Ca21chr3:1357777-1372776 [+] [CAM1, MNN9, orf19.7381, NOG1]

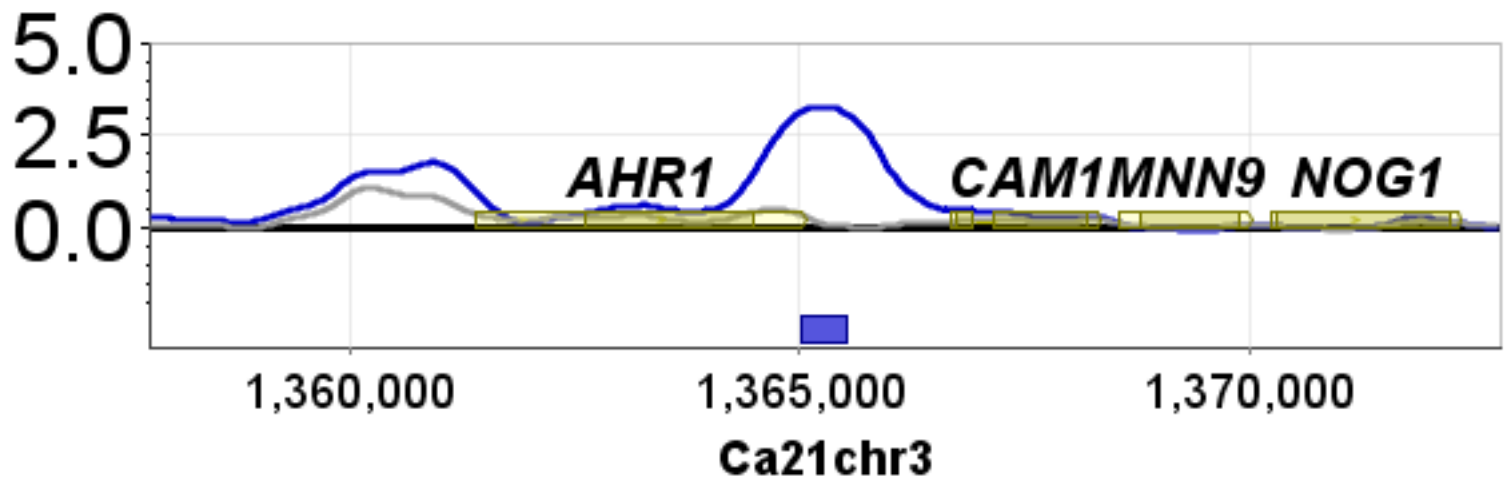

[3.224] Ca21chr7:904814-919813 [+] [ntar\_1151, ntar\_1152, orf19.7151, orf19.7152, ntar\_1153]

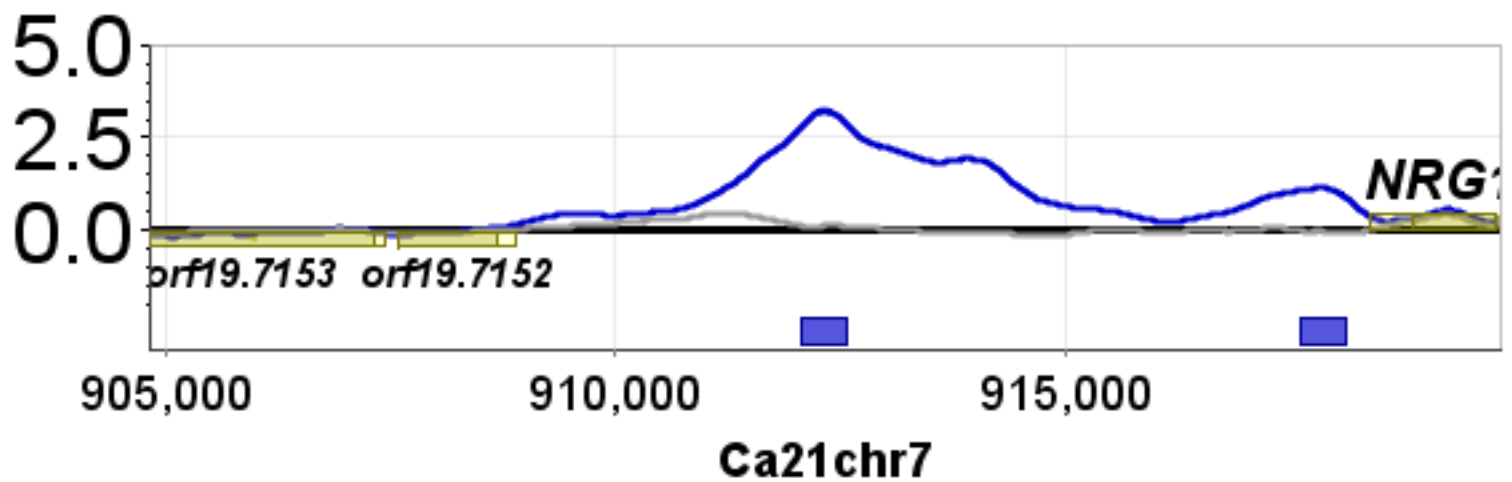

[2.996] Ca21chrR:1710571-1725570 [+] [ntar\_1351, ntar\_1353, ntar\_1352, tg(gcc)1, EFG1]

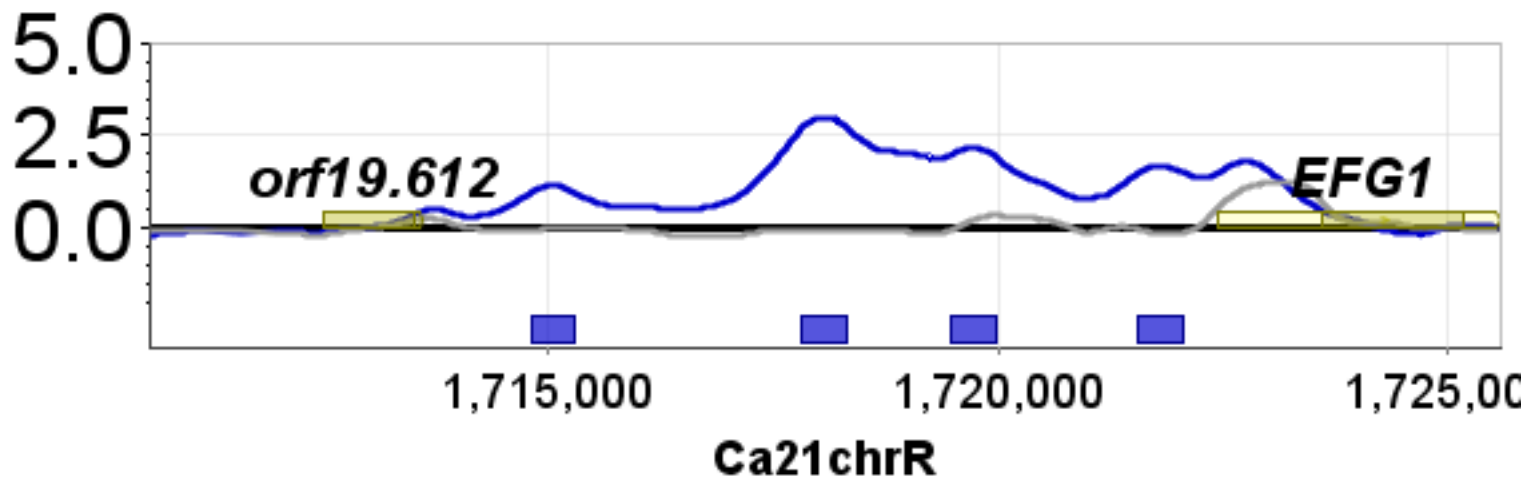

[2.995] Ca21chrR:582668-597667 [+] [orf19.2822, orf19.2821, orf19.2820]

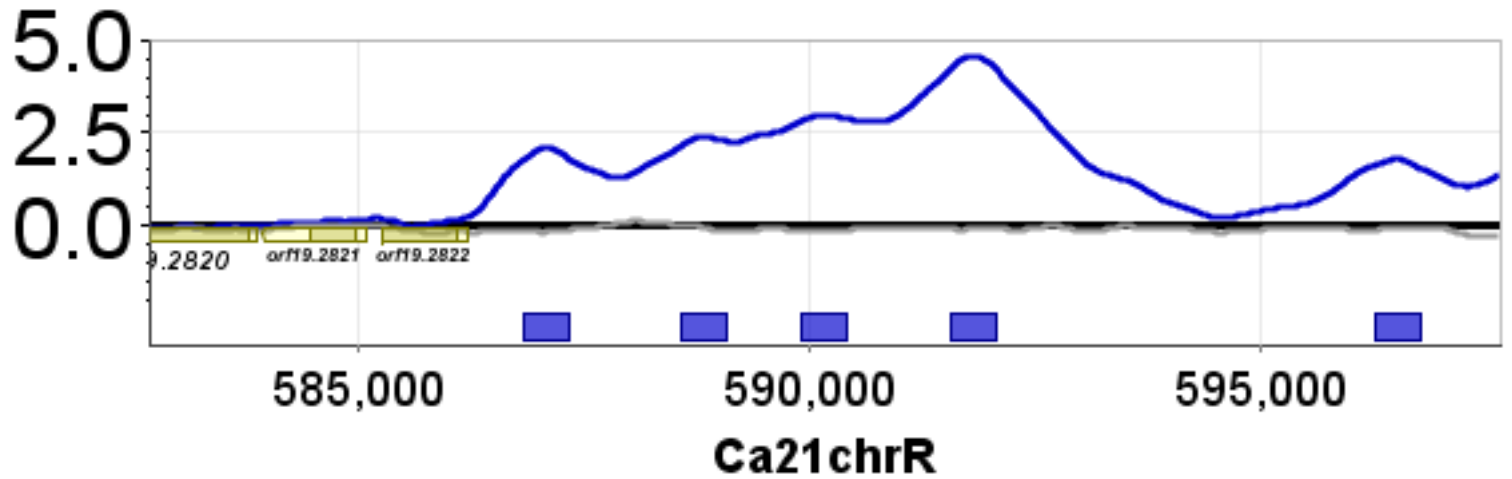

[2.993] Ca21chr5:247210-262209 [+] [orf19.1958, orf19.1959, ntar\_866, ntar\_867, ntar\_864]

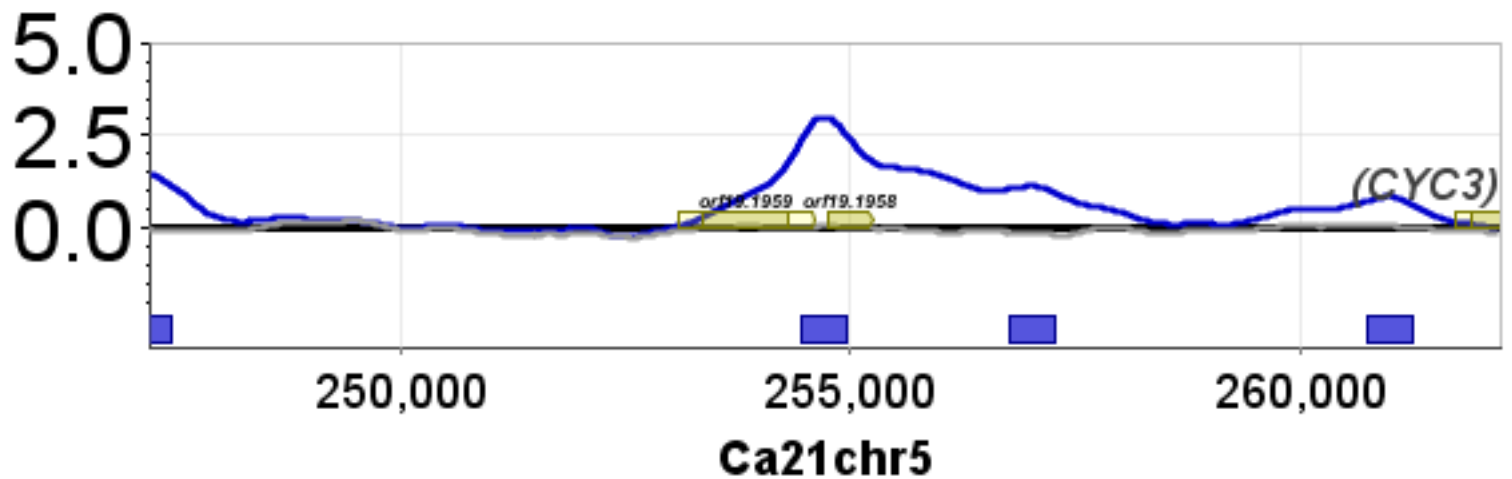

[2.964] Ca21chr3:1114122-1129121 [+] [ntar\_614, ntar\_615, ntar\_616, ntar\_617, WOR2]

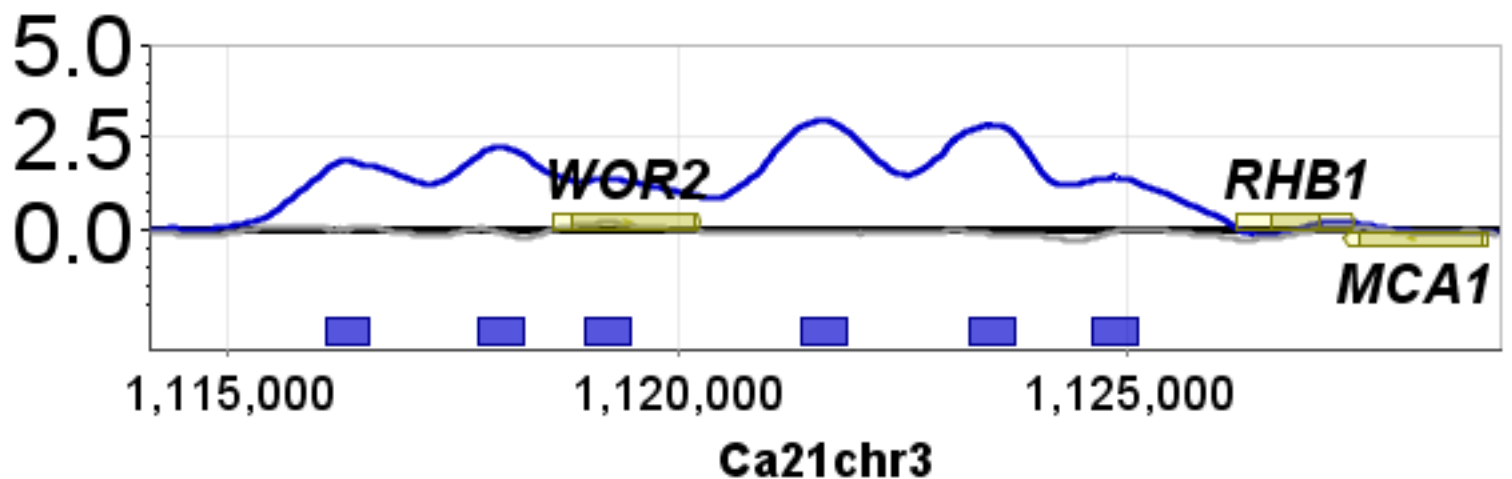

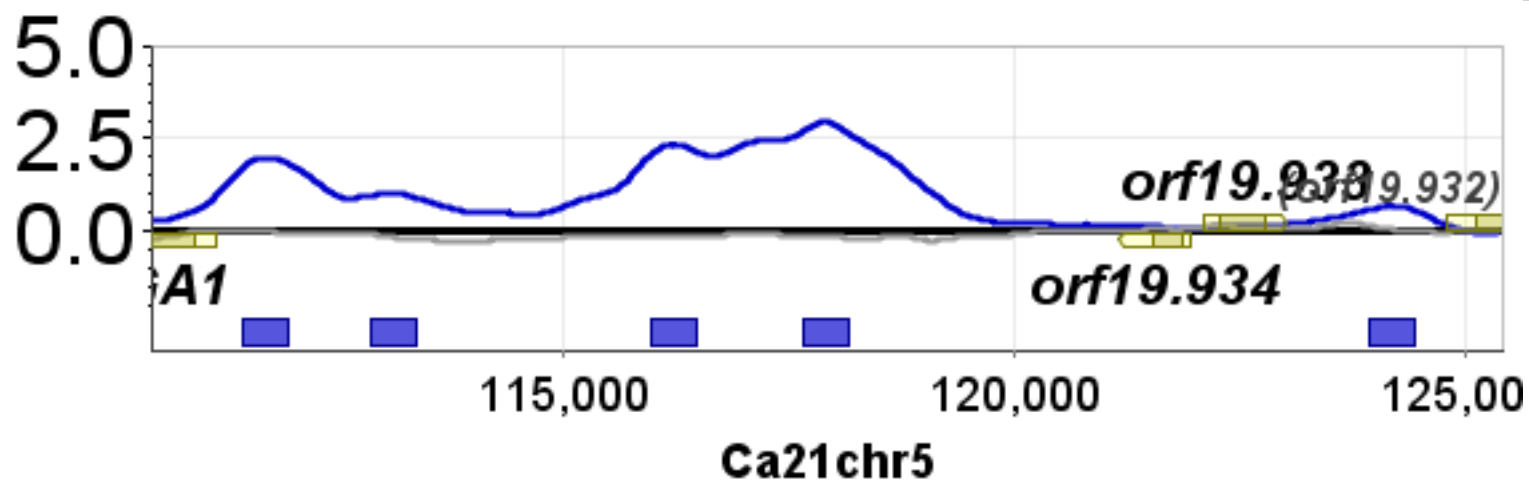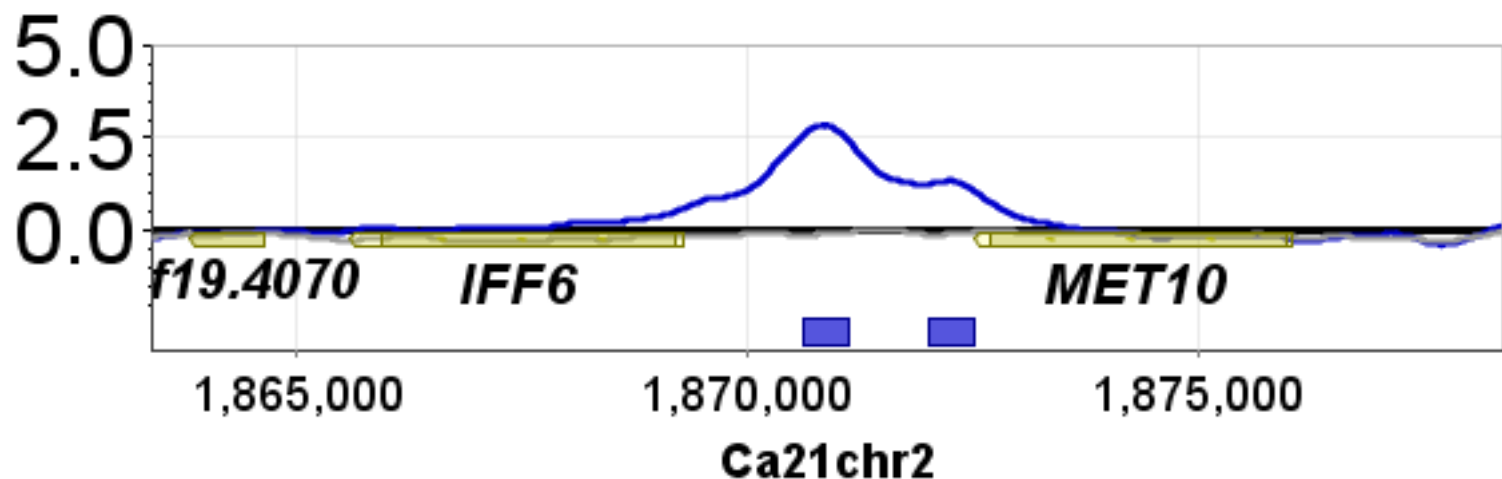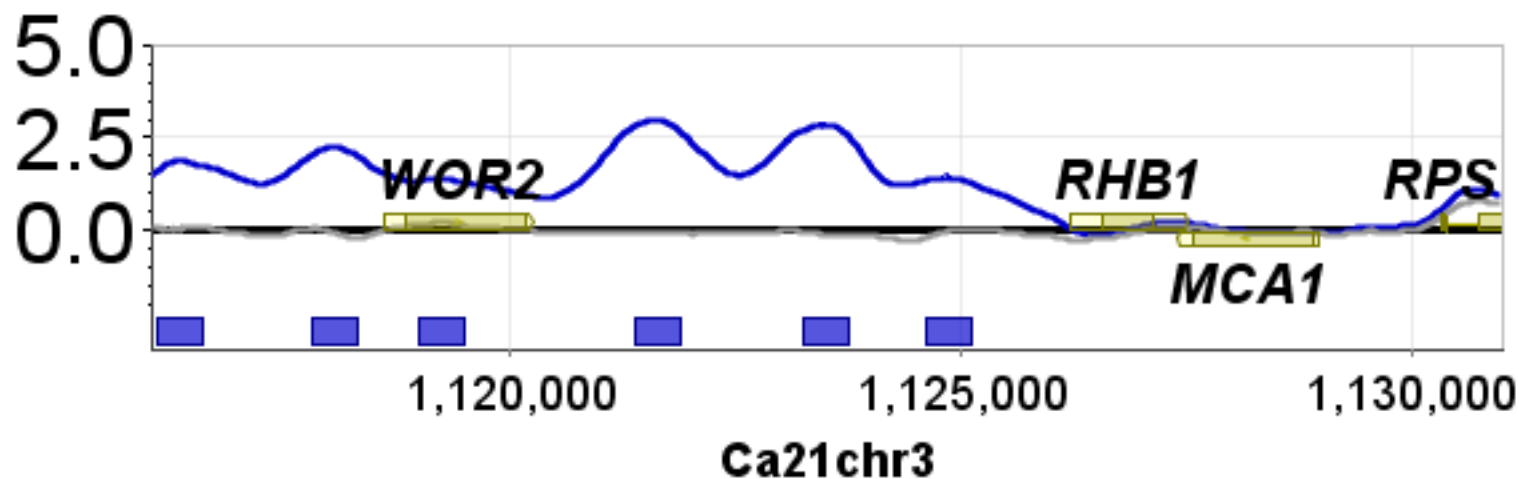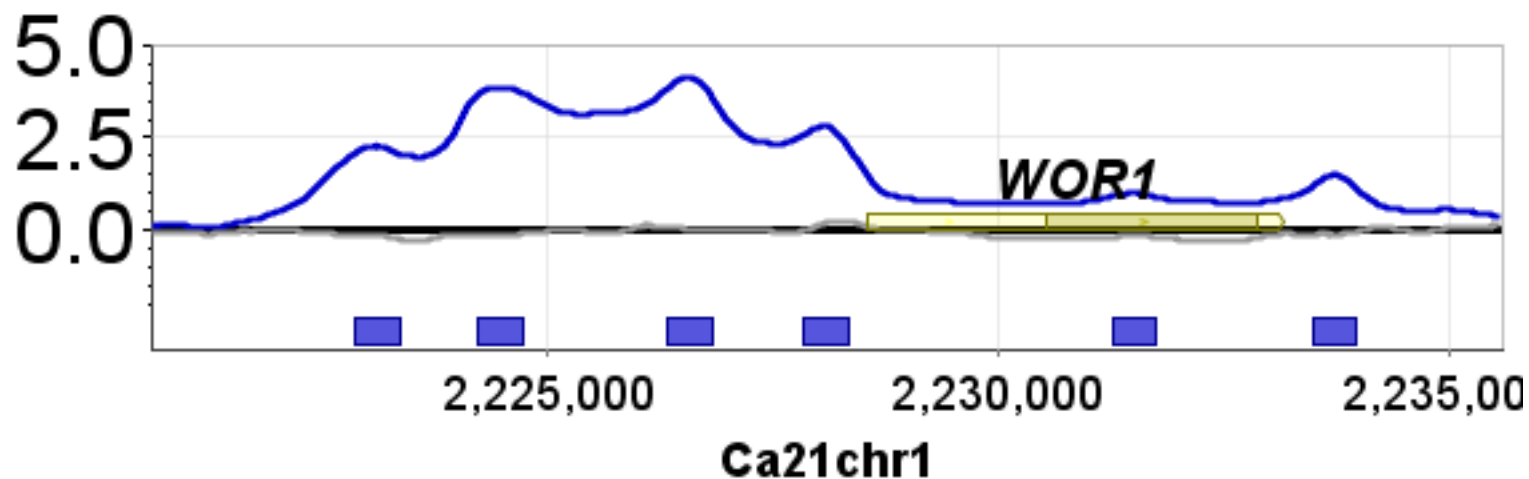

[2.724] Ca21chrR:865291-880290 [+] [orf19.467, IFF9, orf19.4358]

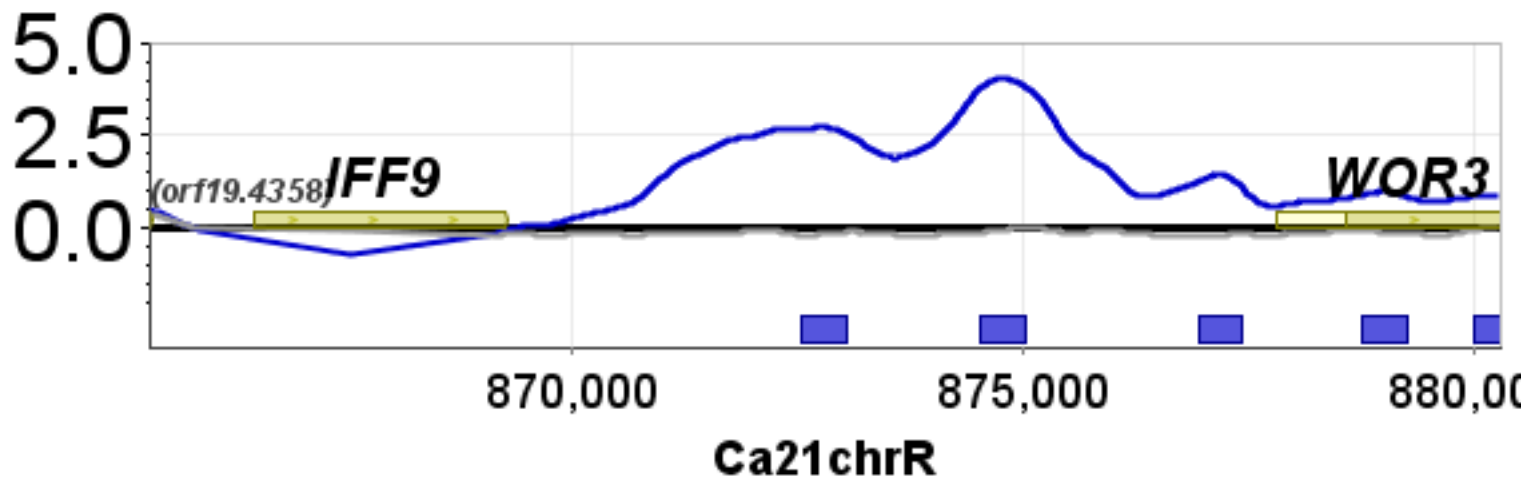

[2.716] Ca21chr1:440609-455608 [+] [ntar\_43, ntar\_42, GAL1, orf19.3671, SHA3]

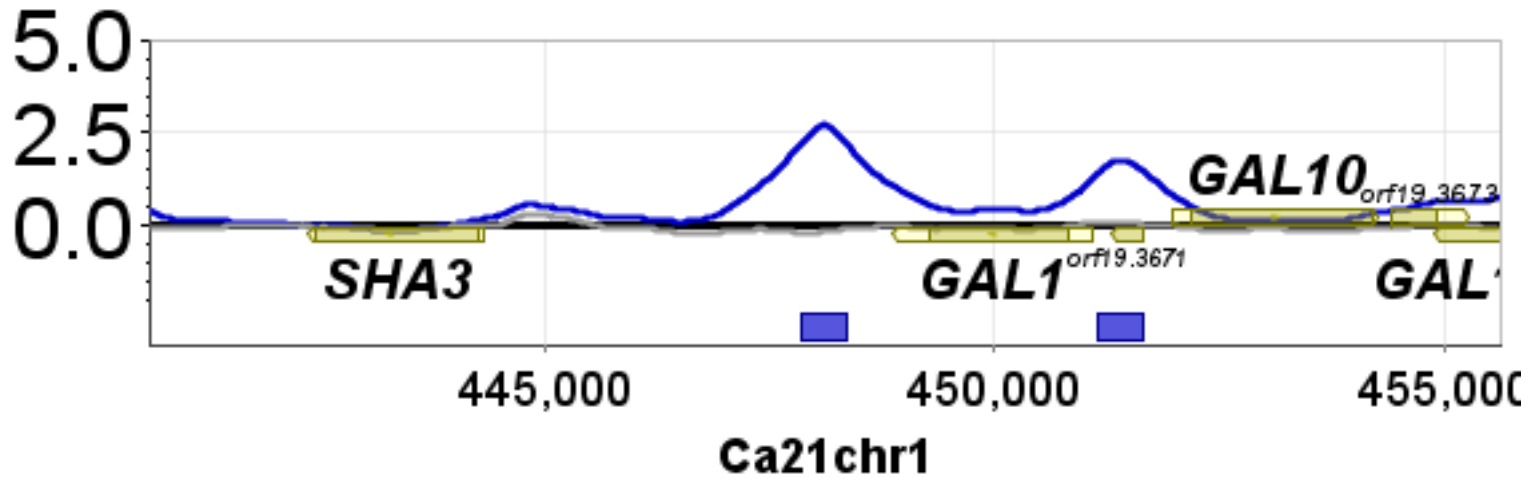

[2.695] Ca21chrR:591132-606131 [+] [RFG1, ntar\_1219]

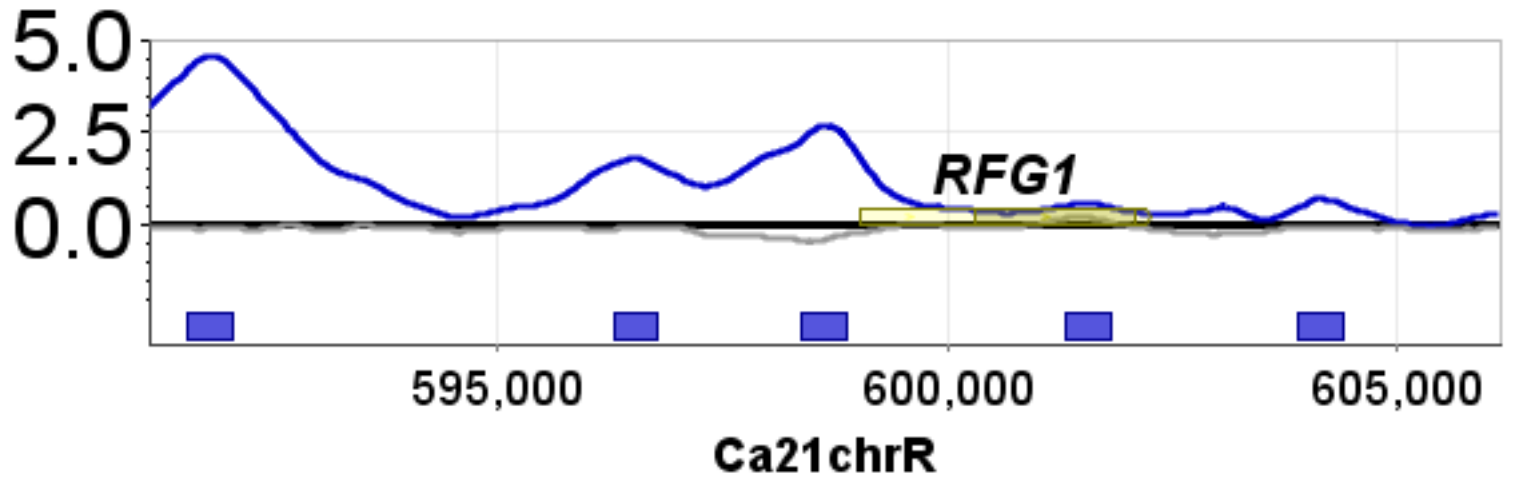

[2.641] Ca21chr2:736530-751529 [+] [ADAEC, orf19.867, ntar\_354, RAD32, orf19.864]

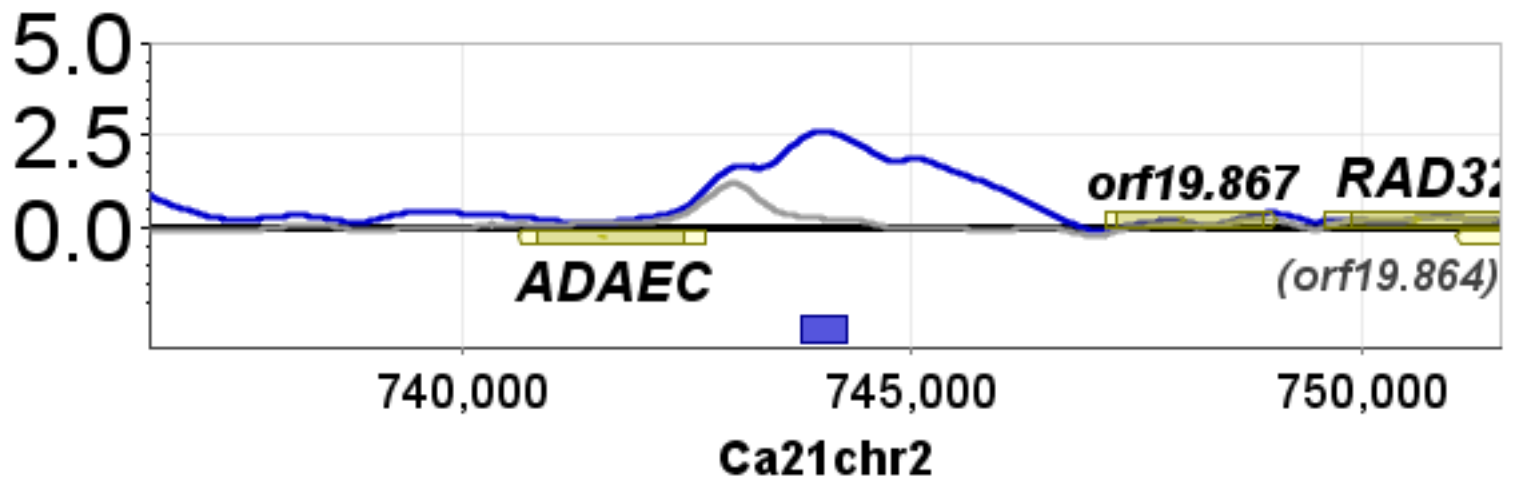

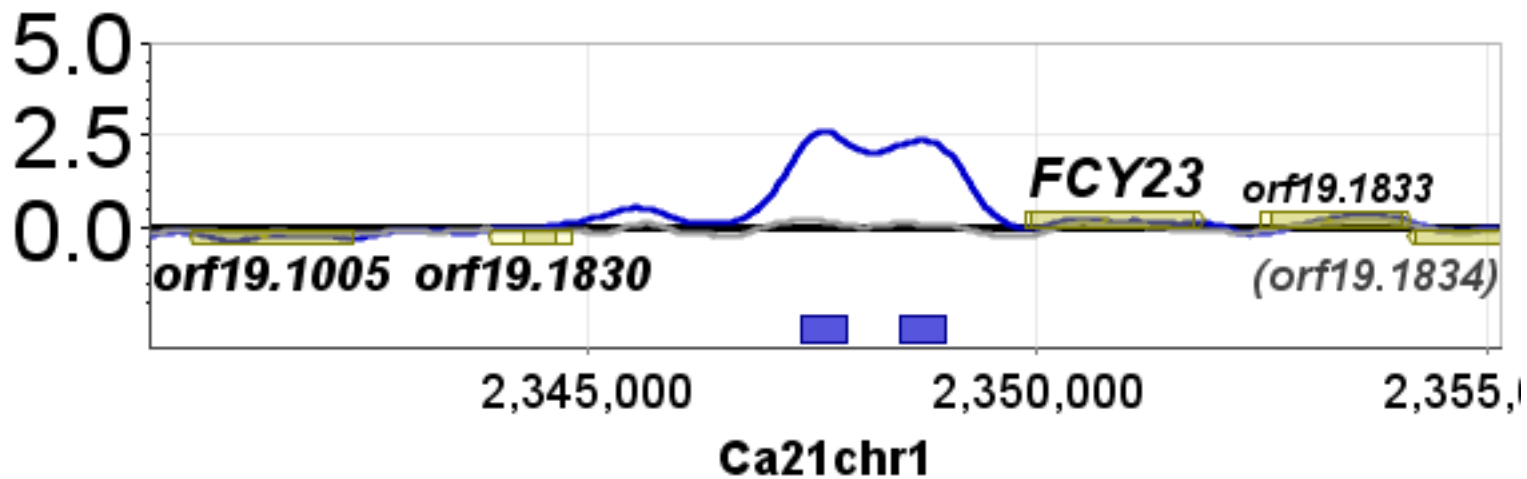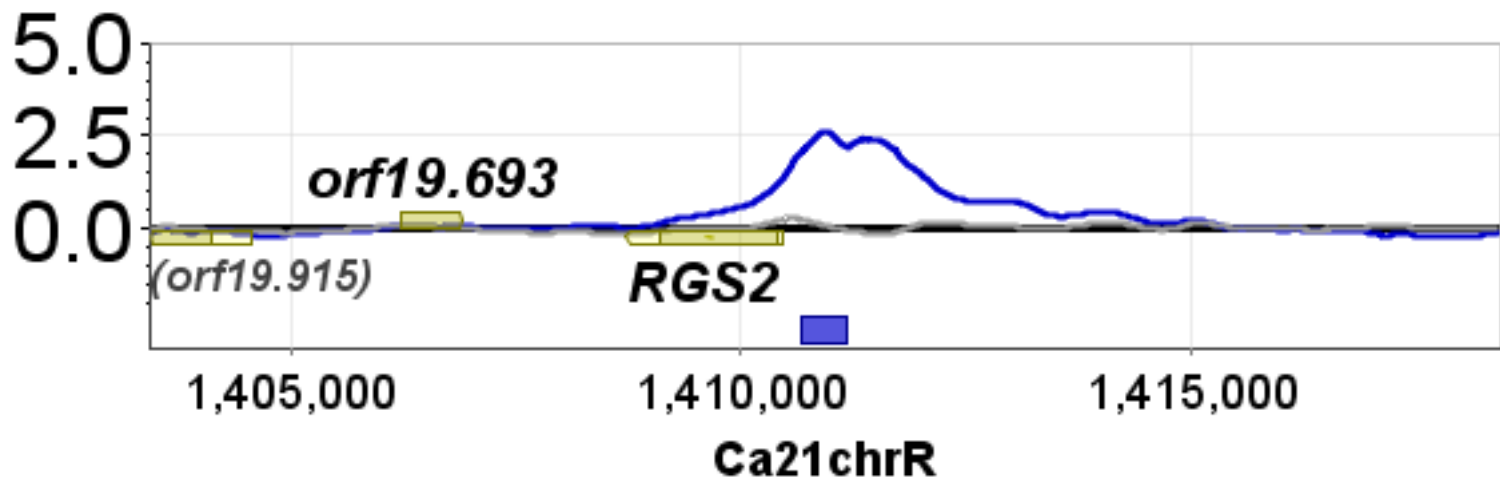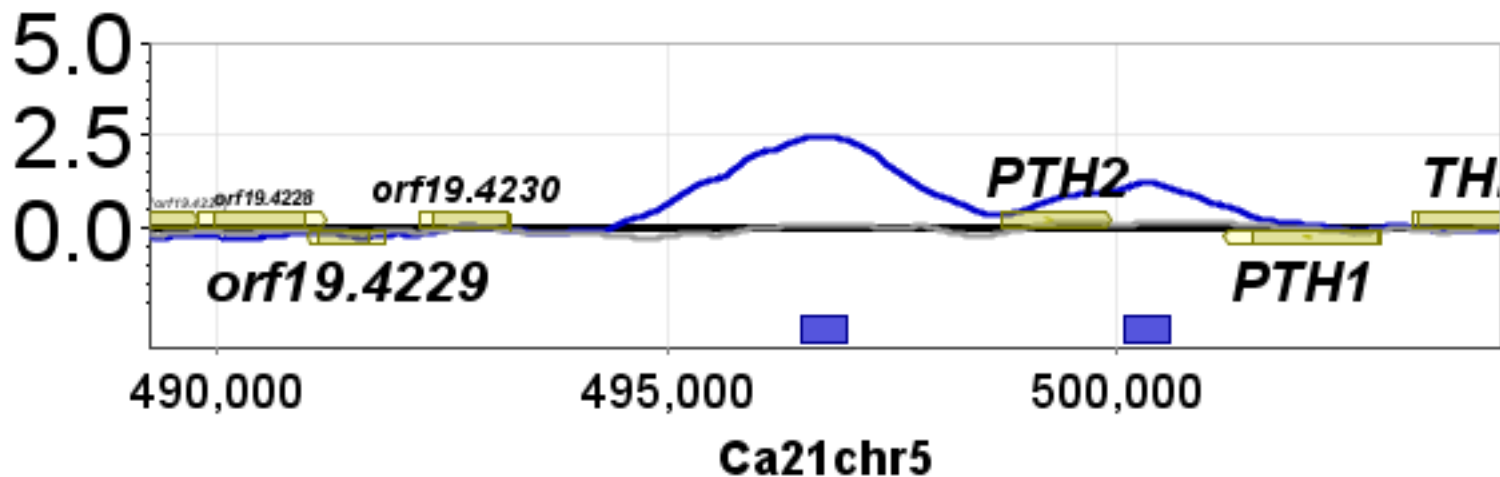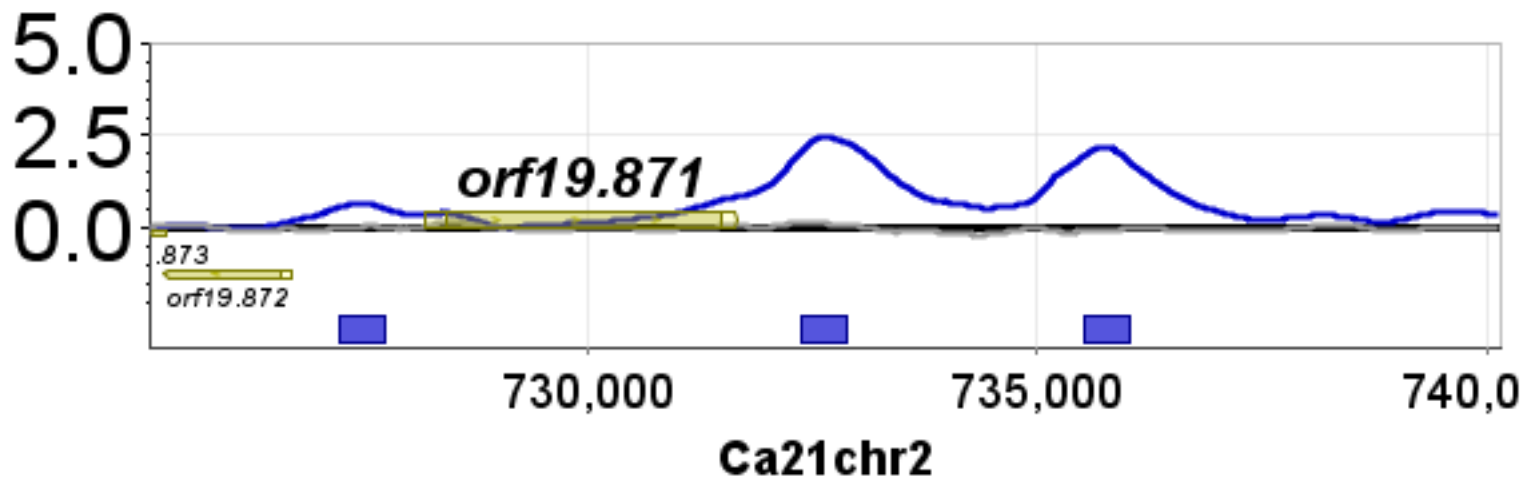



[2.474] Ca21chr1:2267294-2282293 [+] [ntar\_209, orf19.4900, GCA1, ntar\_210, orf19.4901]

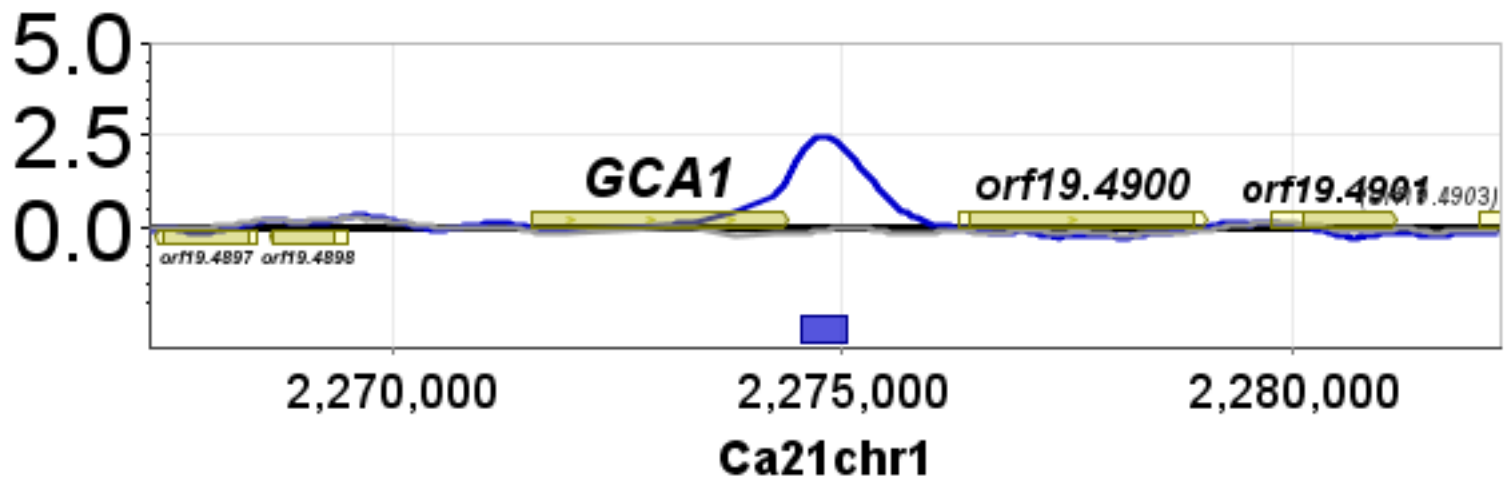

[2.445] Ca21chrR:1306339-1321338 [+] [ntar\_1302, orf19.3868, orf19.3869, ntar\_1301, ntar\_1300]

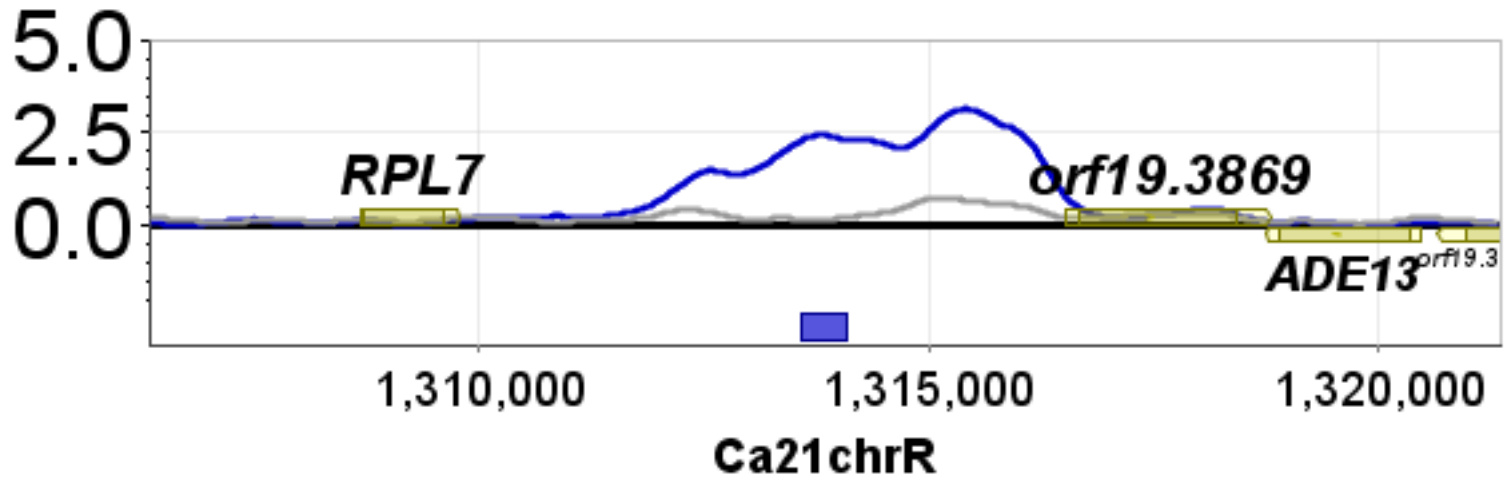

[2.413] Ca21chrR:581330-596329 [+] [orf19.2822, orf19.2821, orf19.2820, orf19.2819]

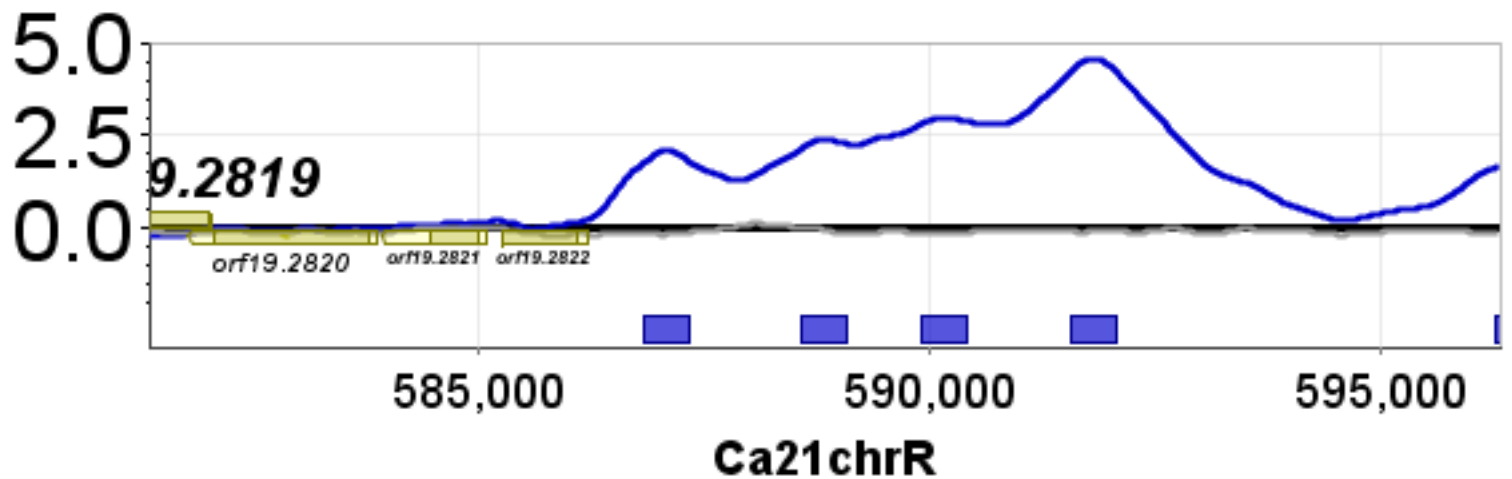

[2.404] Ca21chrR:1518608-1533607 [+] [CRZ2, ntar\_1331, URA2, ALS3]

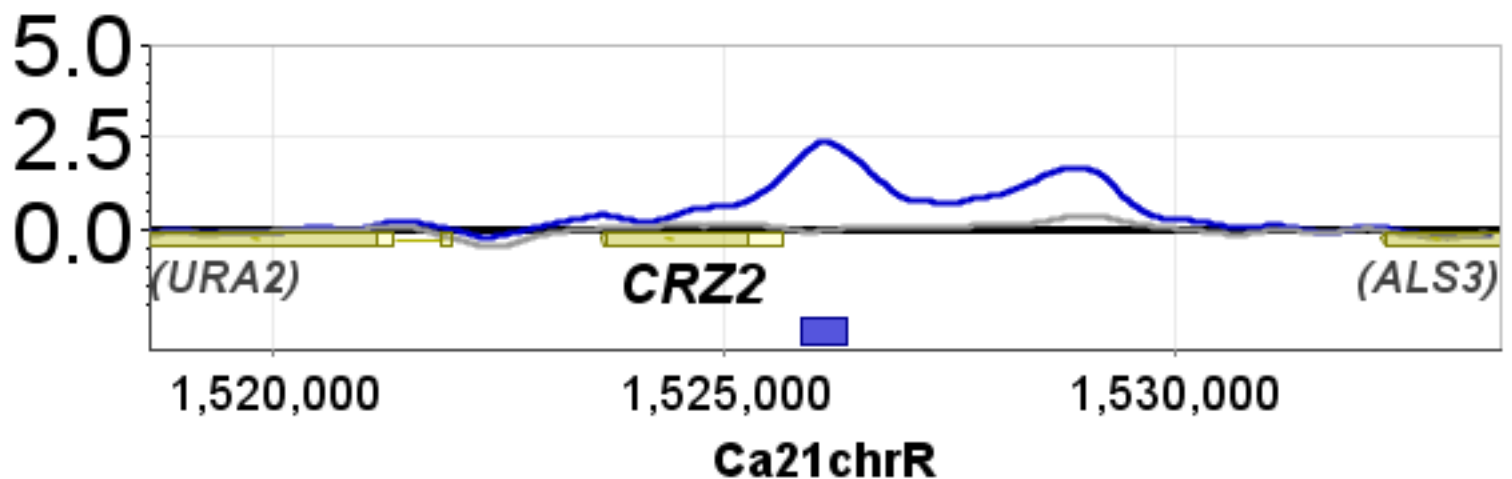

[2.371] Ca21chr1:2341238-2356237 [+] [ntar\_222, orf19.1831, FCY23, ntar\_221, ntar\_223]

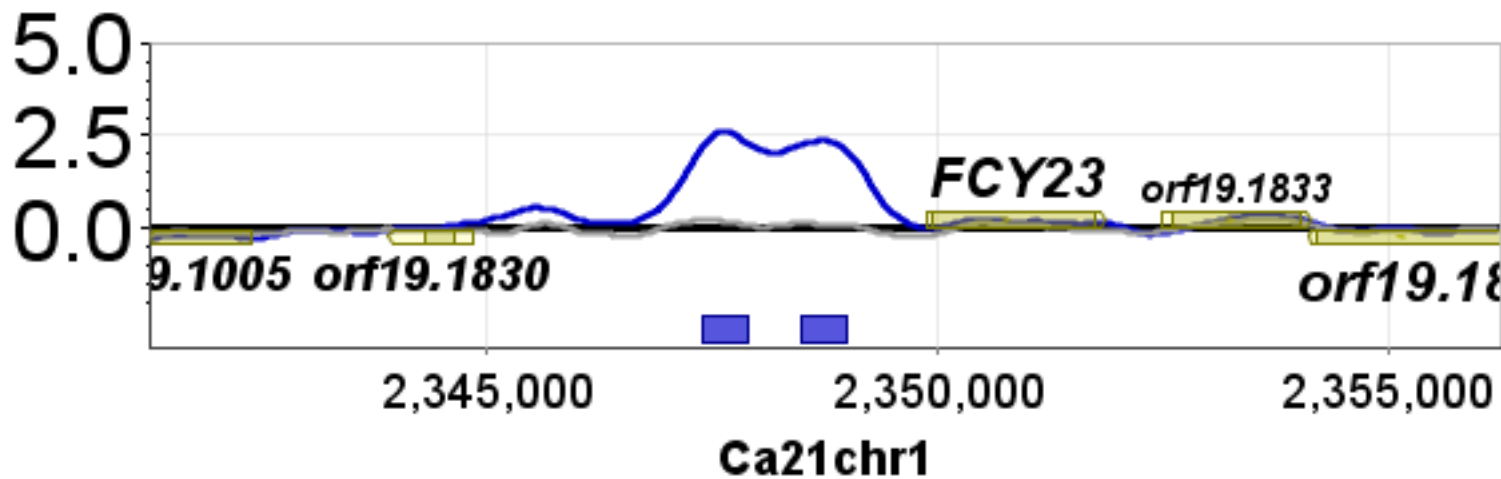

[2.371] Ca21chr5:585284-600283 [+] [MNN1, orf19.4280, orf19.4278, orf19.4281, orf19.4282]

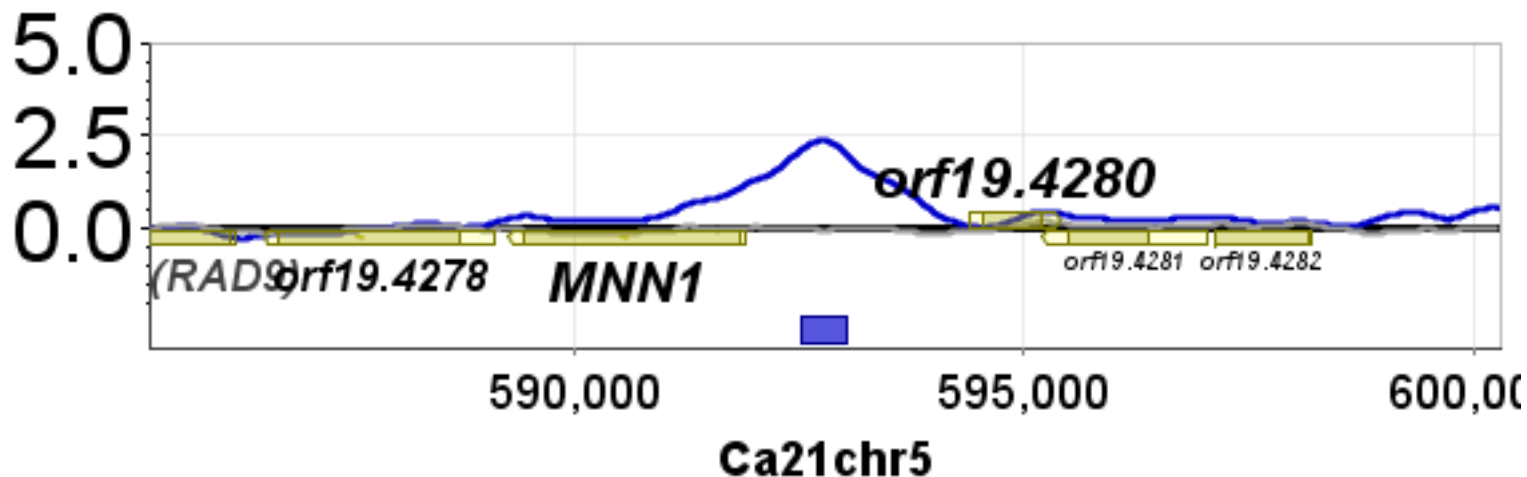

[2.357] Ca21chr1:1070159-1085158 [+] [GAT2, orf19.4057, orf19.4059, orf19.450]

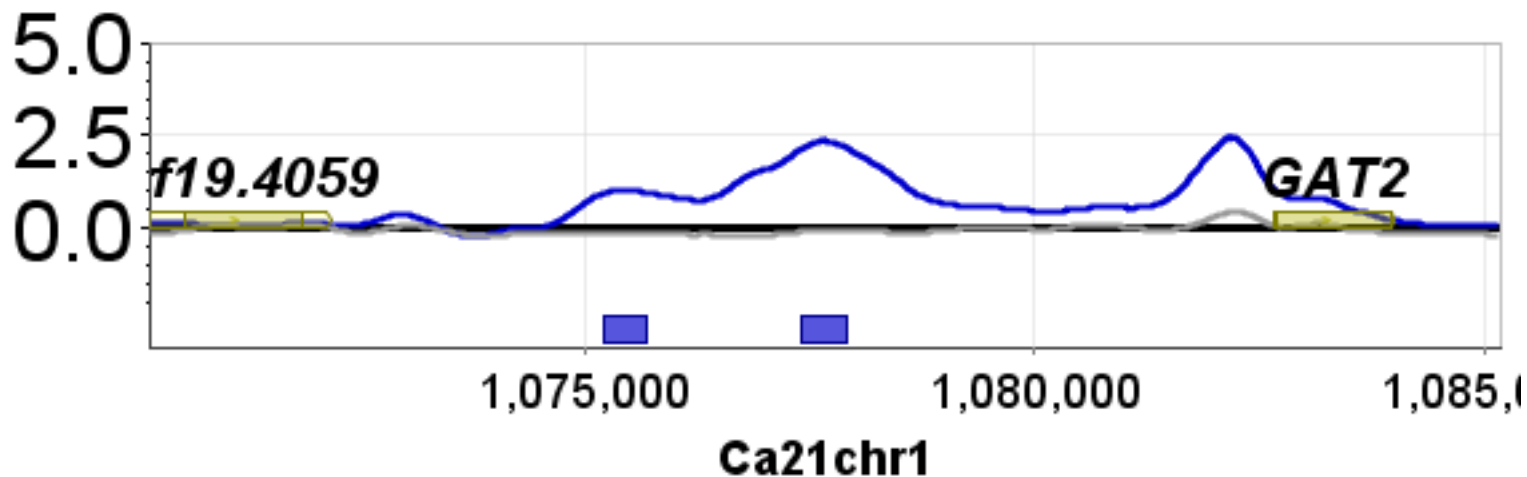

[2.353] Ca21chr5:108732-123731 [+] [AGA1, orf19.934, orf19.933]

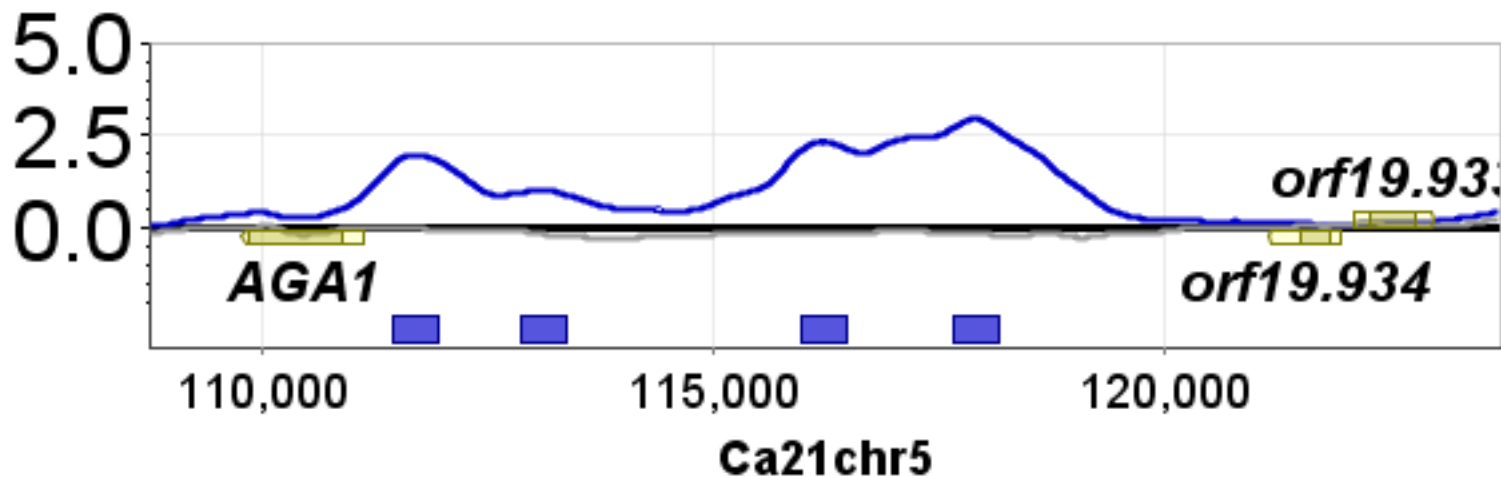

[2.308] Ca21chr4:1515684-1530683 [+] [CZF1, orf19.3128, CCT6, orf19.3125, orf19.3129]

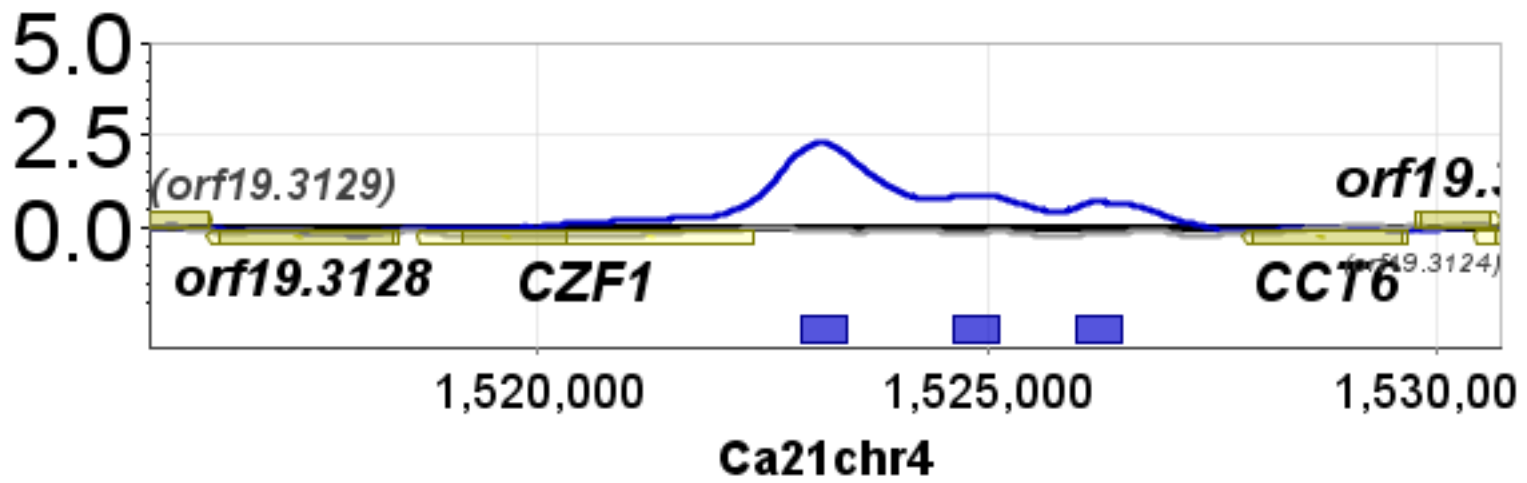

[2.306] Ca21chrR:2076755-2091754 [+] [ntar\_1396.5, ntar\_1397.1, ntar\_1396, ntar\_1398, ntar\_1395]

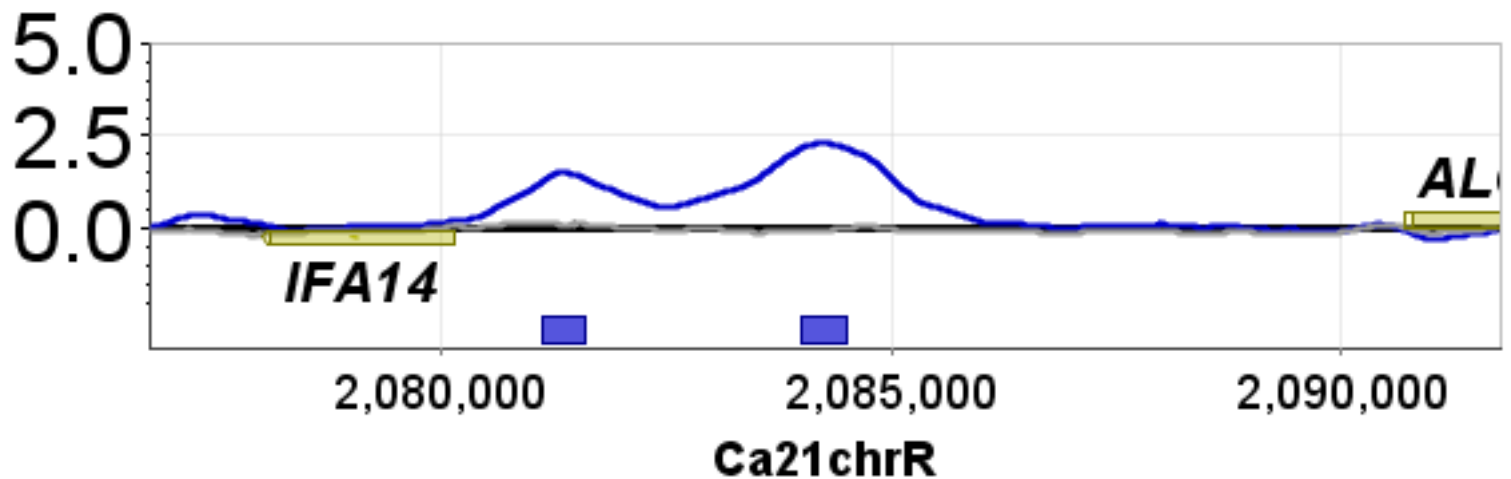

[2.298] Ca21chrR:27437-42436 [+] [orf19.7522, REP1, MKC1, POT1, orf19.7527]

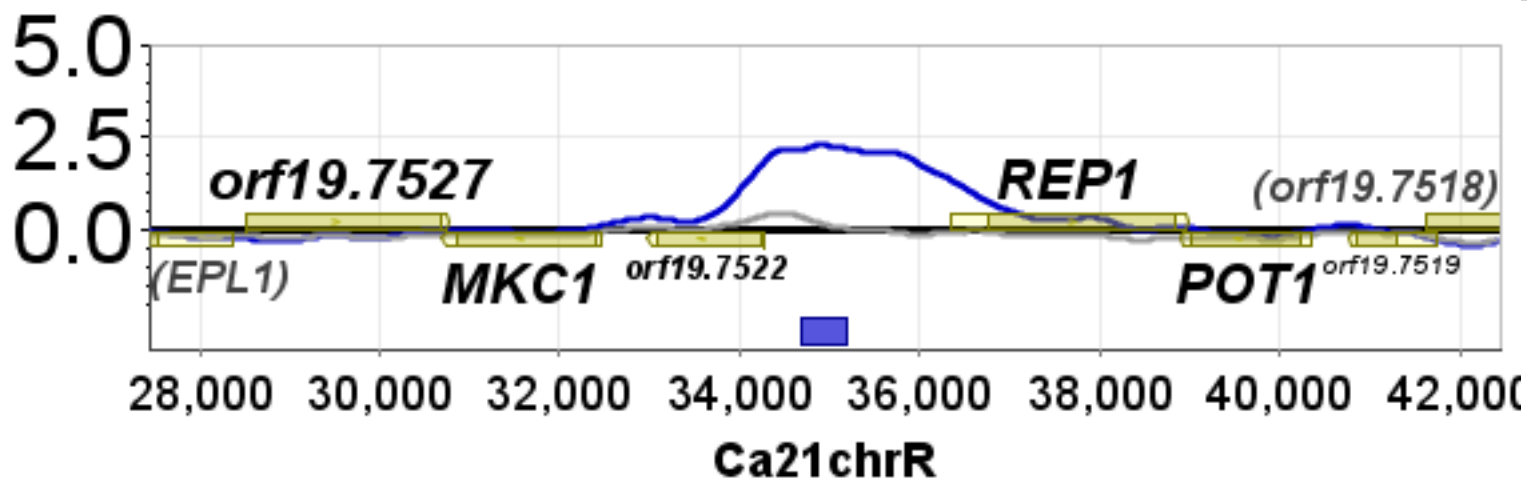

[2.283] Ca21chr1:2215601-2230600 [+] [ntar\_207, orf19.4883, WOR1, ntar\_206, orf19.4882]

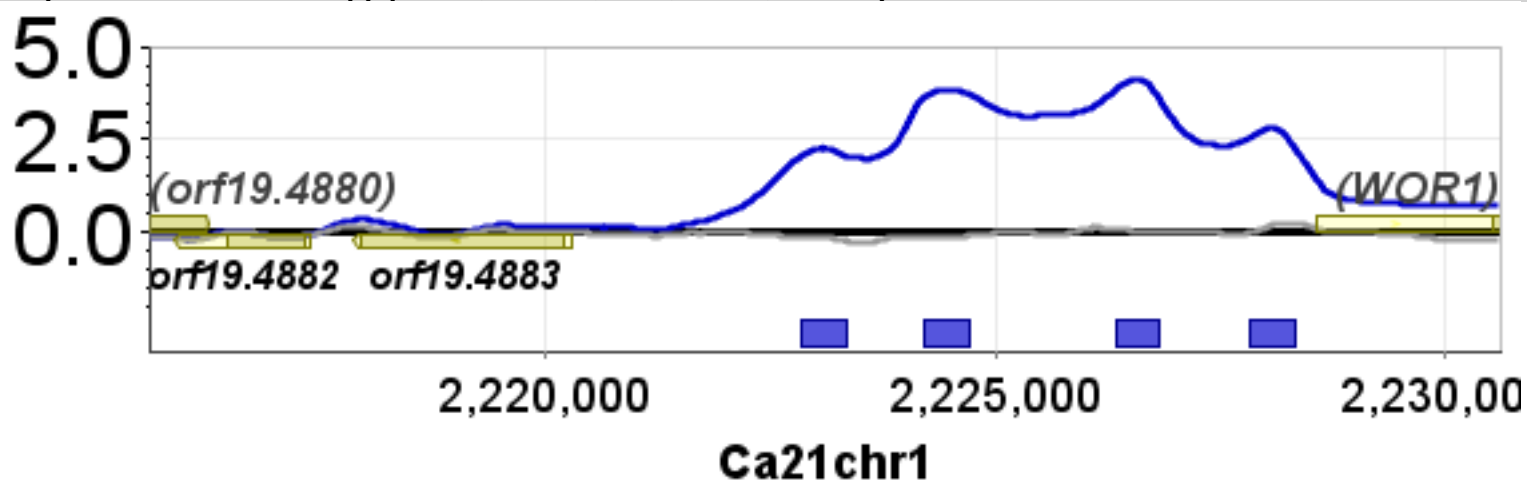

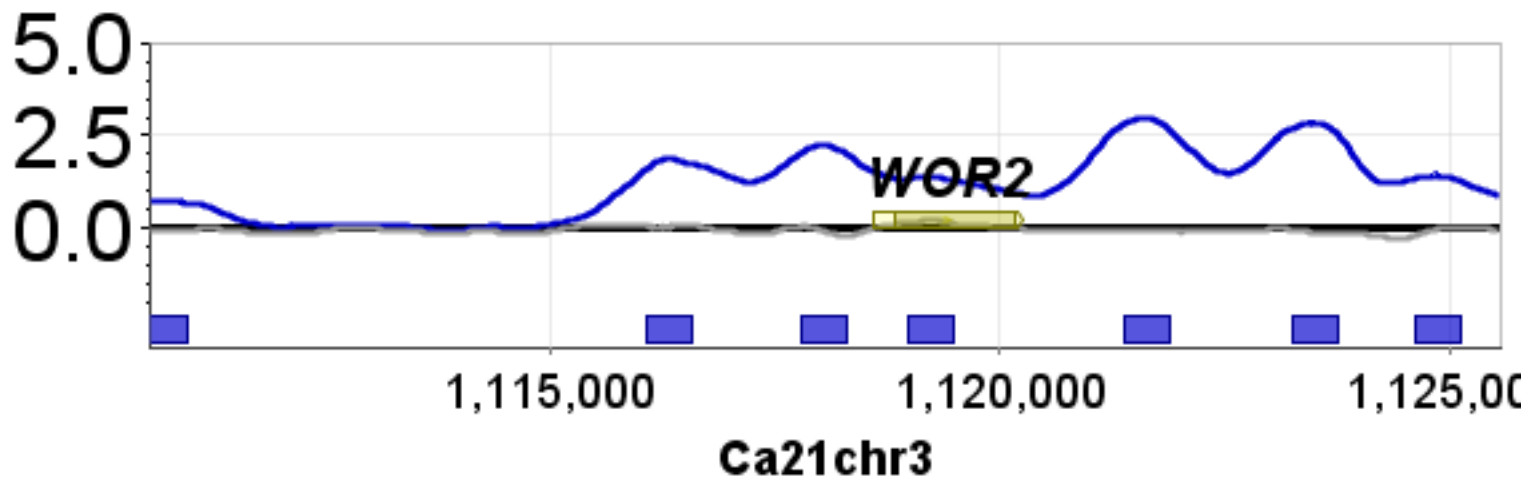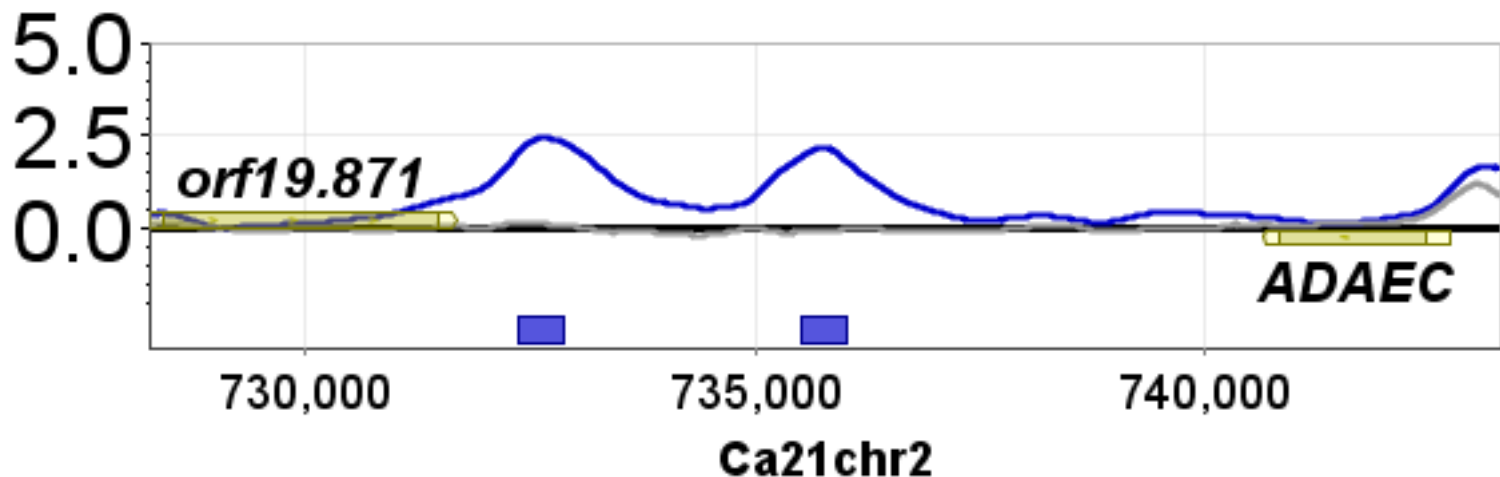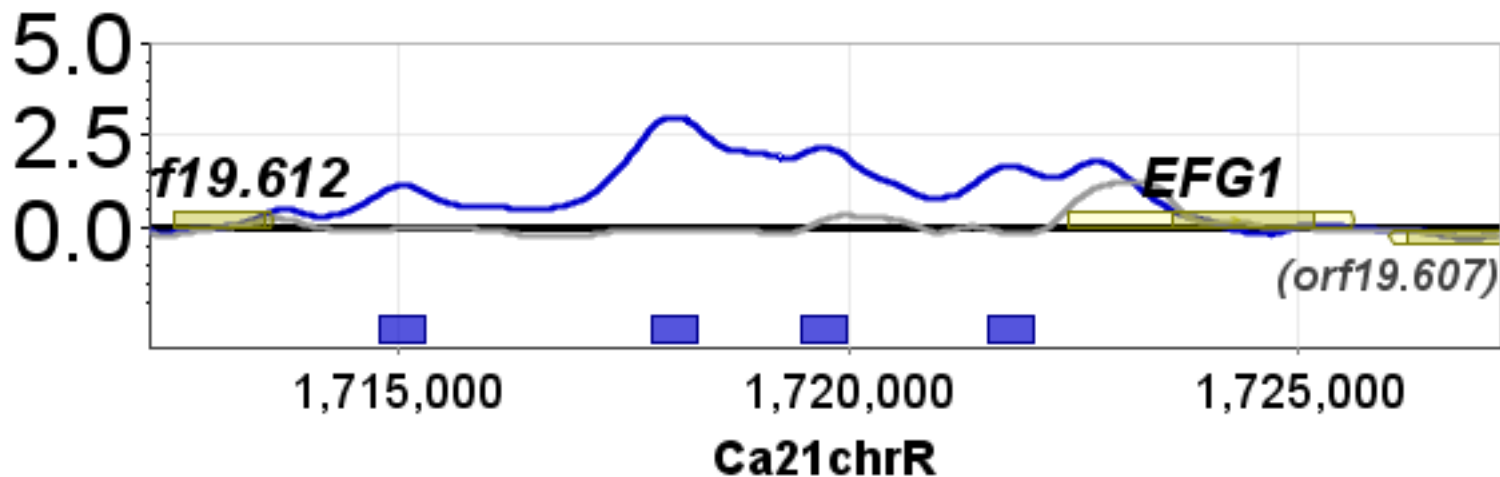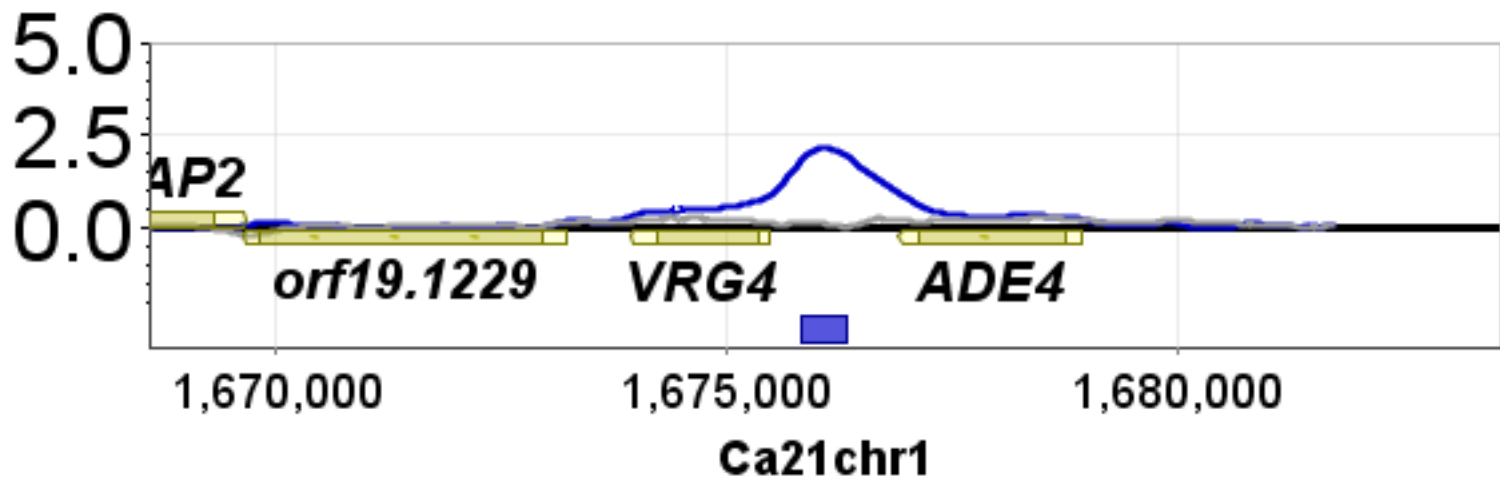

[2.084] Ca21chrR:579586-594585 [+] [orf19.2822, orf19.2821, orf19.2820, orf19.2818, orf19.2819]

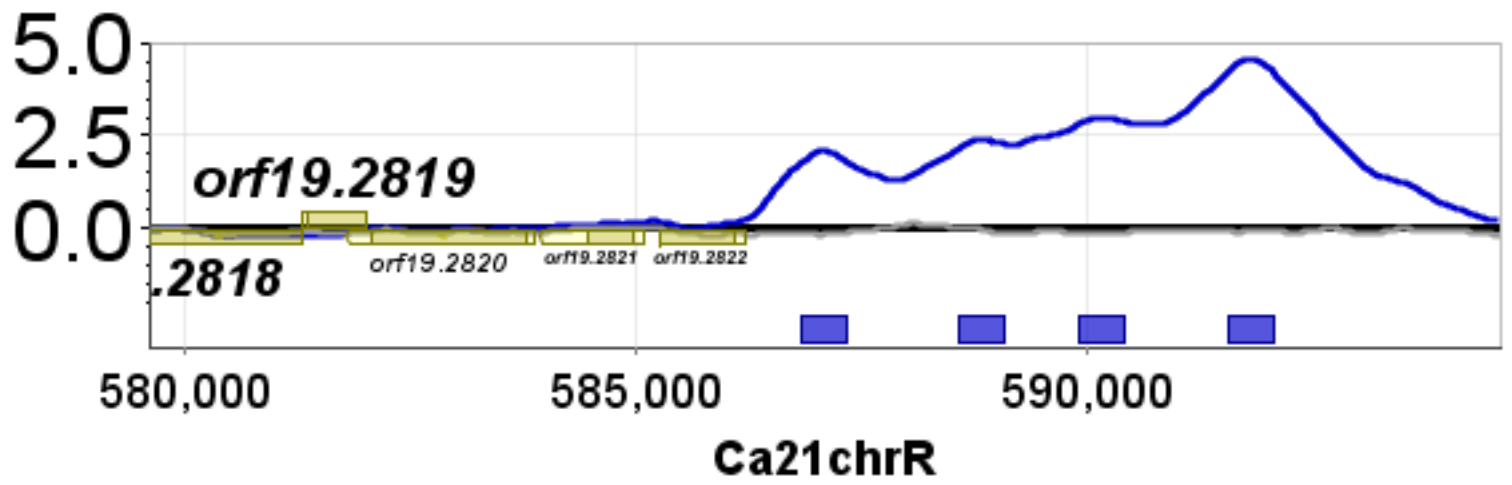

[2.072] Ca21chr7:106617-121616 [+] [orf19.7054, GAC1, ntar\_1413, ntar\_1056, ntar\_1057]

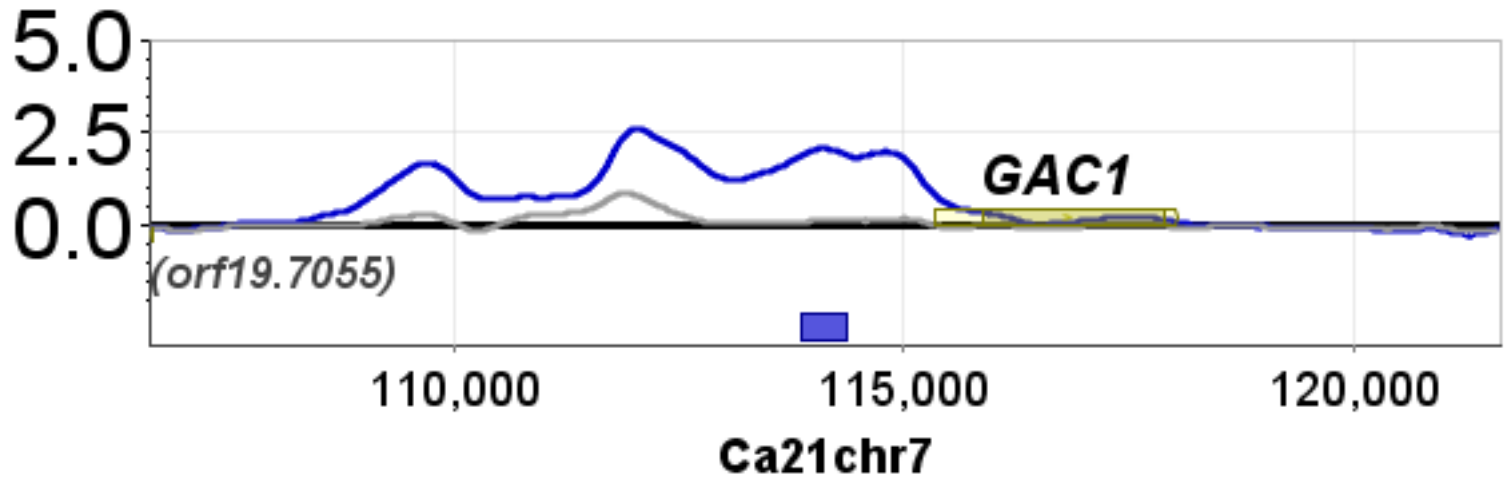

[2.05] Ca21chr1:448852-463851 [+] [GAL7, GAL102, orf19.3673, ABP140, orf19.3677]

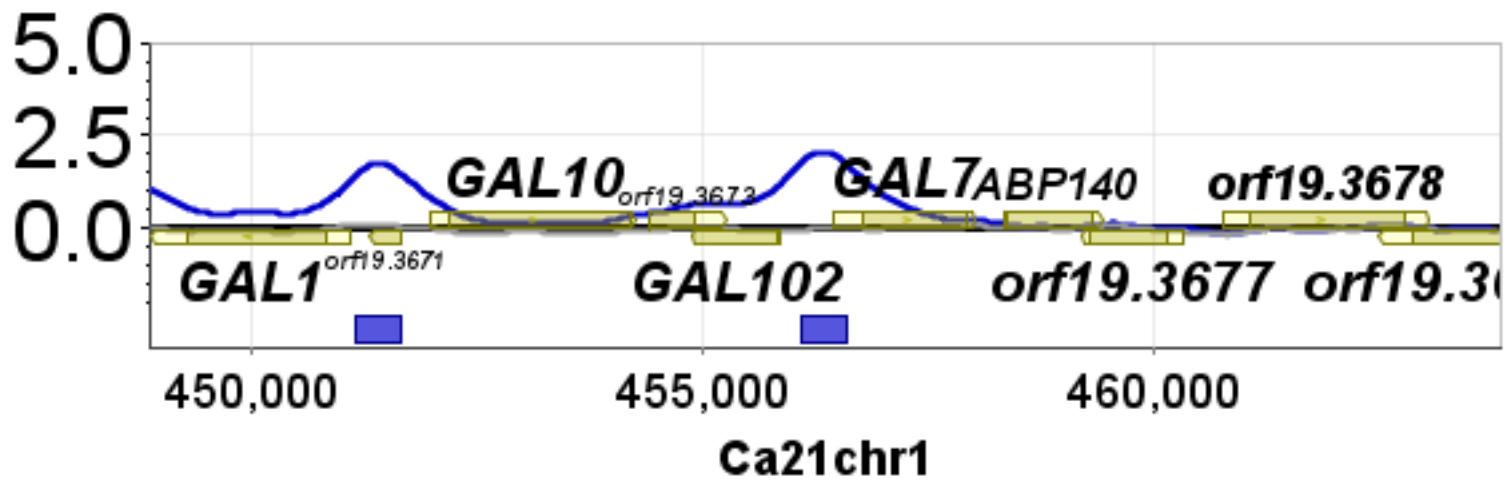

[2.02] Ca21chr5:848588-863587 [+] [orf19.1105.3, PGA56, orf19.1105, orf19.3220, orf19.1106]

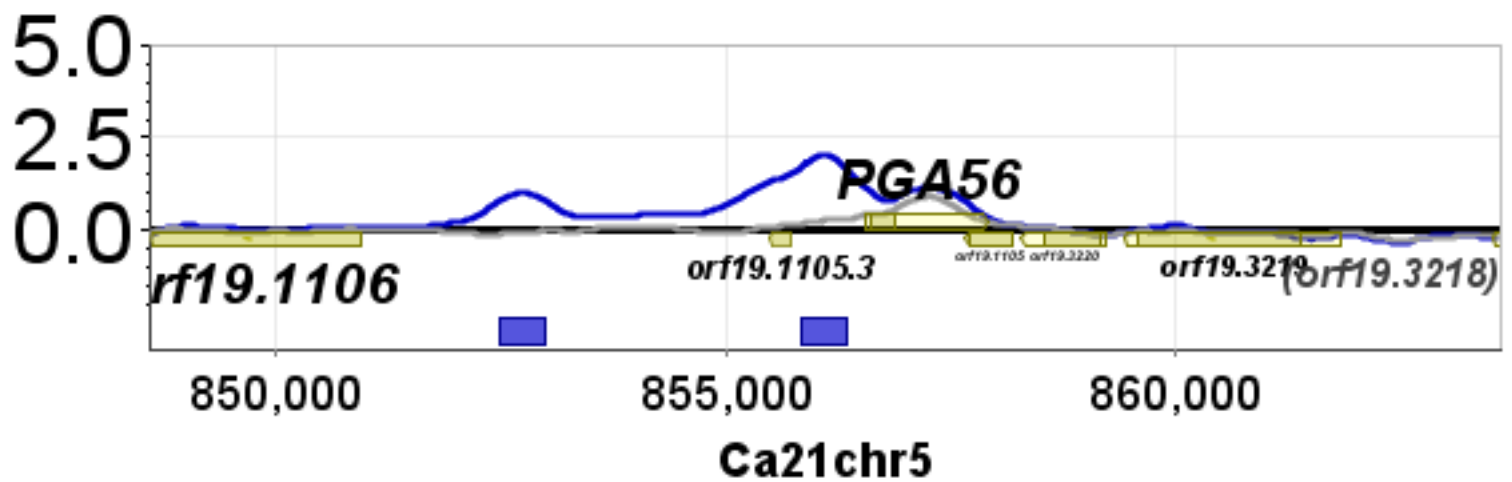

[1.984] Ca21chr5:888124-903123 [+] [orf19.1286, ntar\_940, orf19.1285, orf19.1287, ntar\_939]

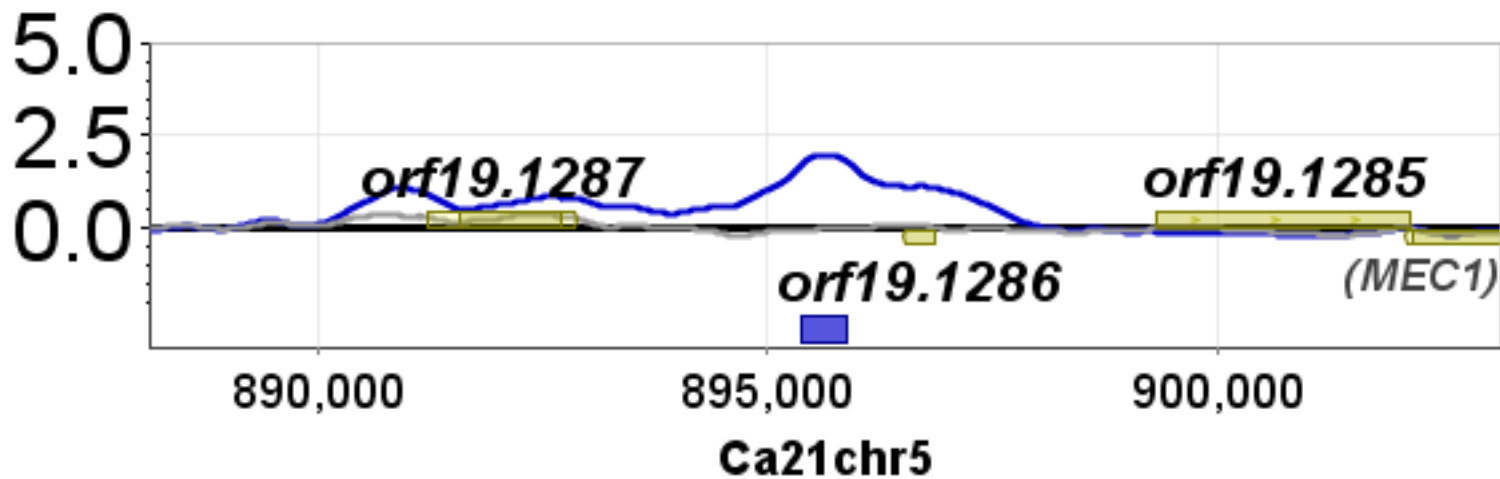

[1.973] Ca21chr5:104189-119188 [+] [AGA1, ntar\_854, orf19.936, orf19.937, orf19.938]

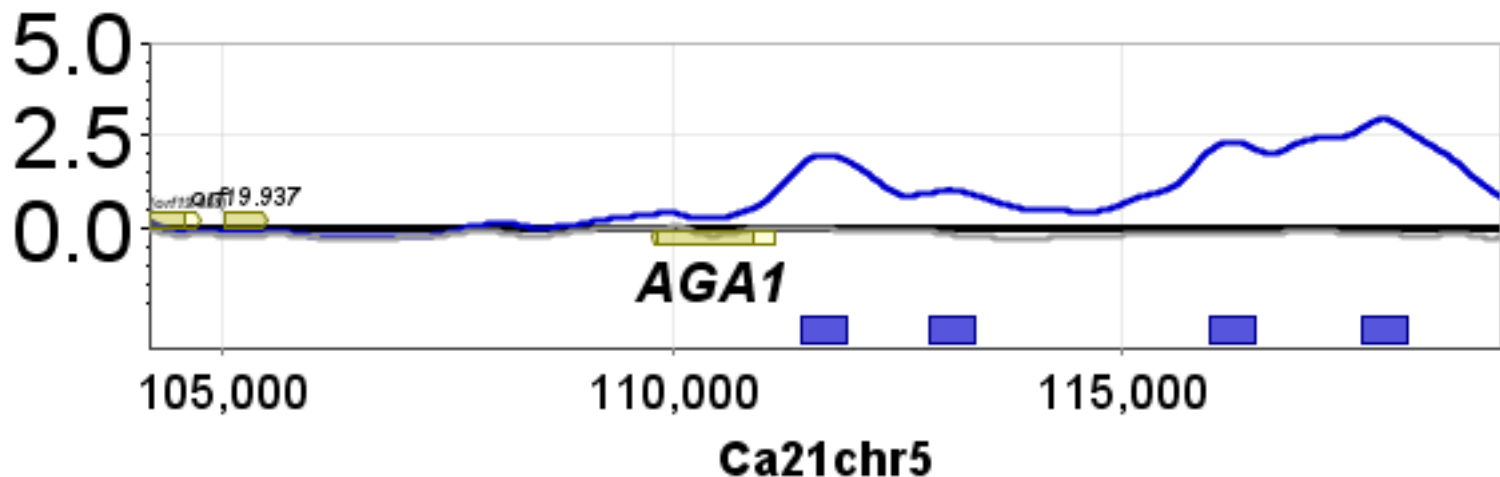

[1.958] Ca21chr2:777940-792939 [+] [orf19.849, orf19.850, orf19.848, tr(ucu)2, tf(gaa)2]

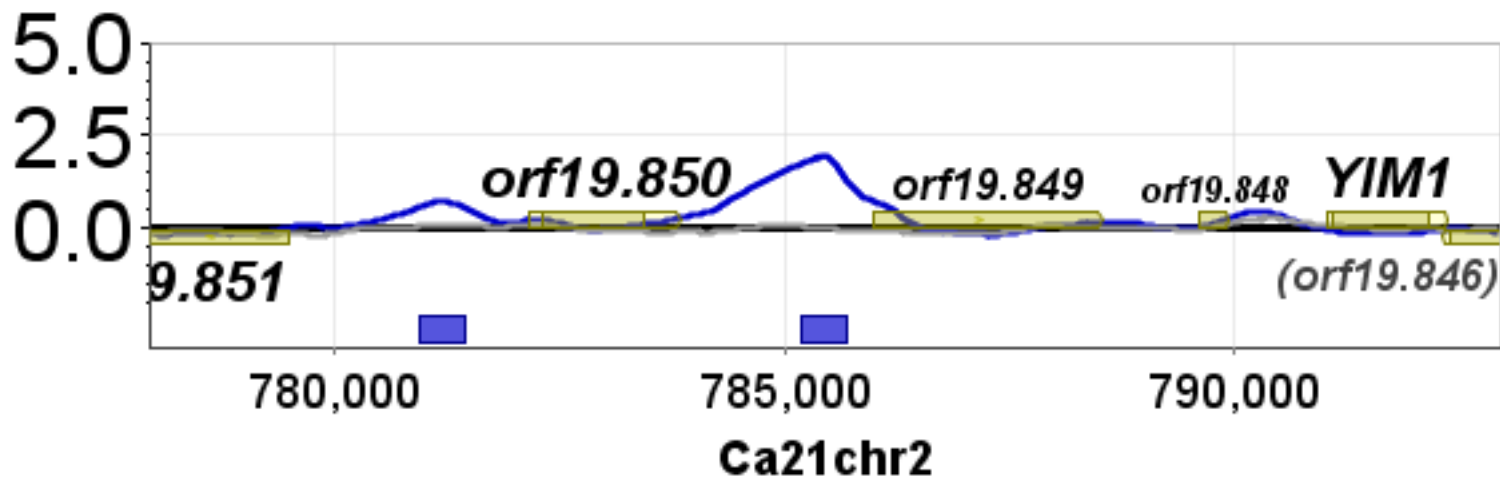

[1.954] Ca21chr1:140046-155045 [+] [ntar\_16, orf19.6027, HGC1, ERG2]

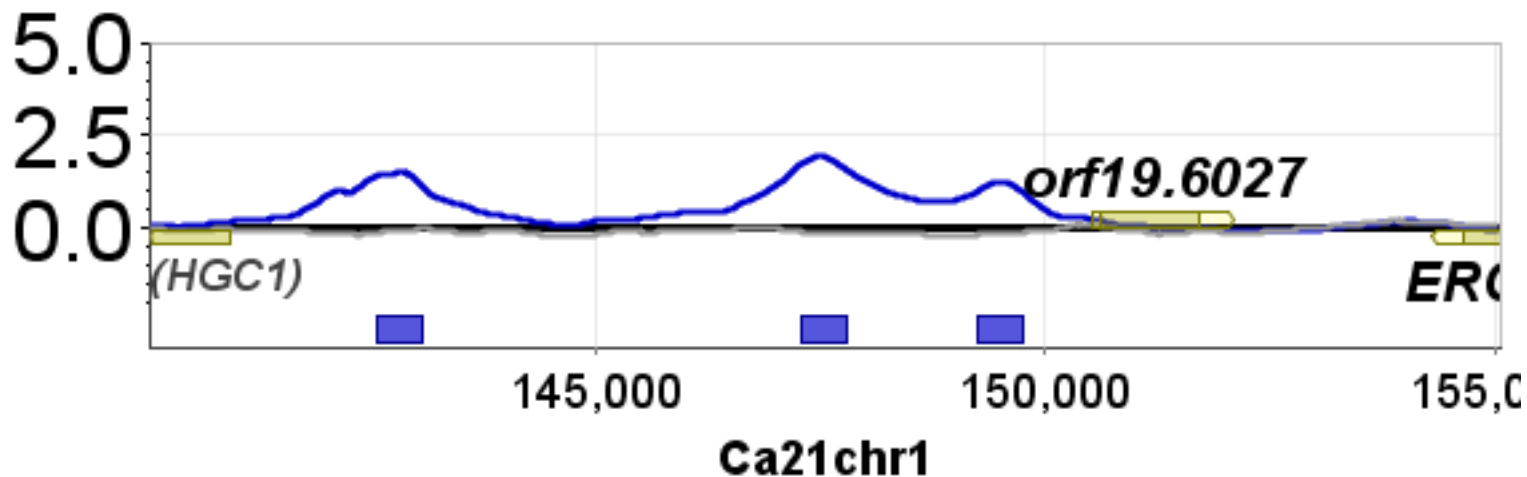

[1.924] Ca21chr2:1738844-1753843 [+] [ntar\_452, YWP1, ntar\_451, ntar\_449, ntar\_450]

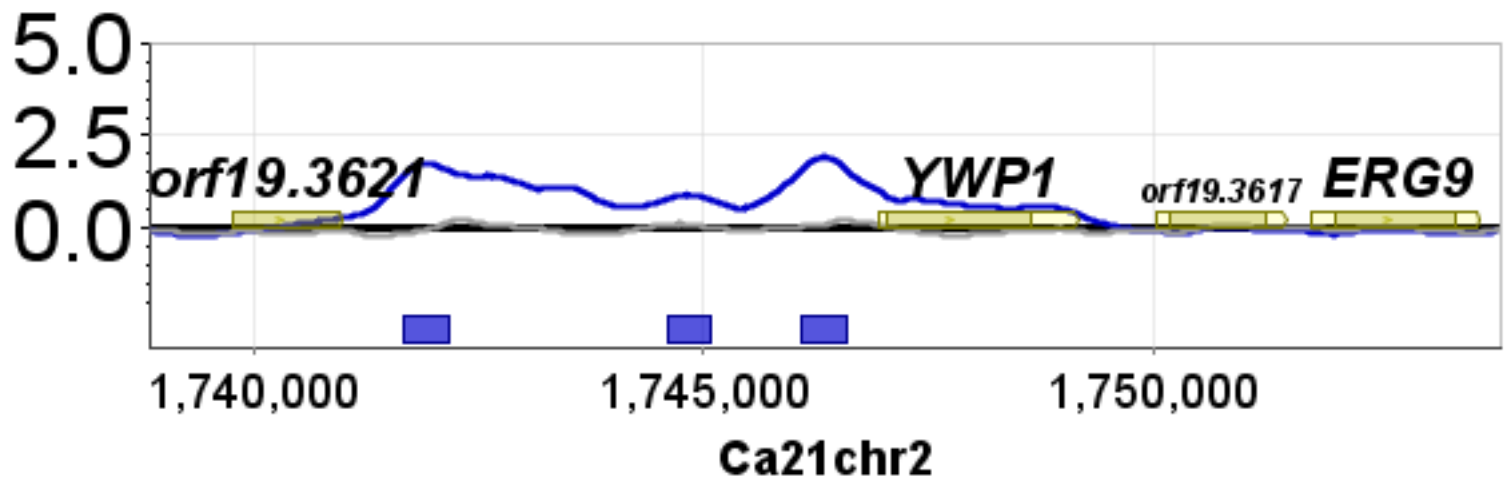

[1.915] Ca21chr2:1796281-1811280 [+] [PIR1, BUD20, orf19.217, orf19.223, orf19.225]

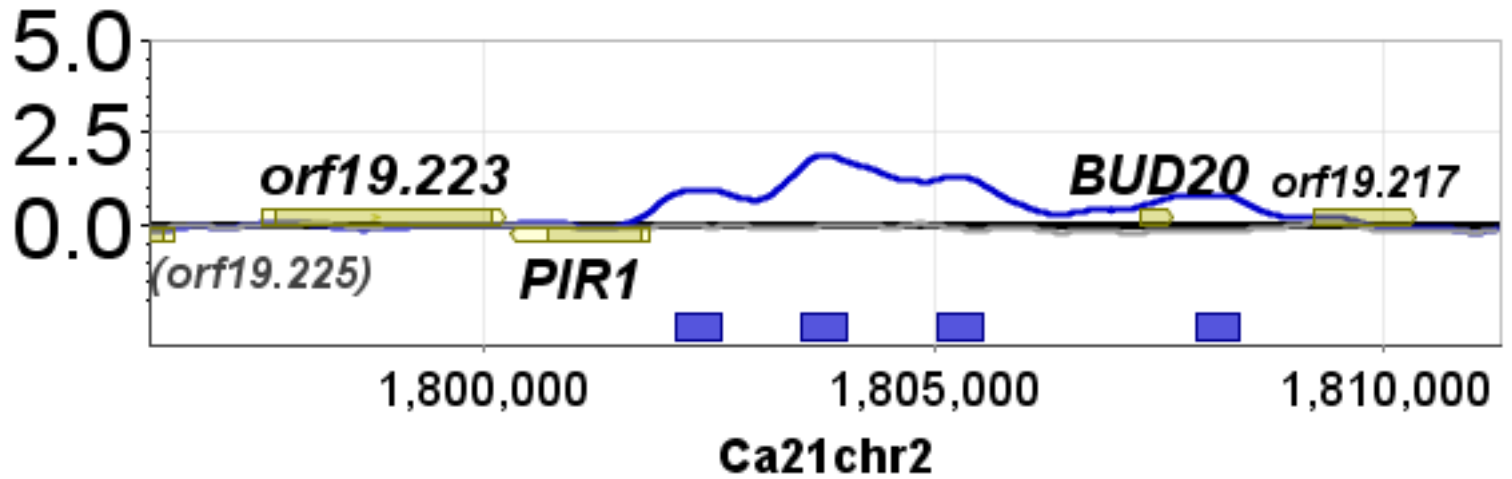

[1.898] Ca21chr1:1982468-1997467 [+] [IPT1, orf19.4768, orf19.4767, ntar\_186, orf19.4766]

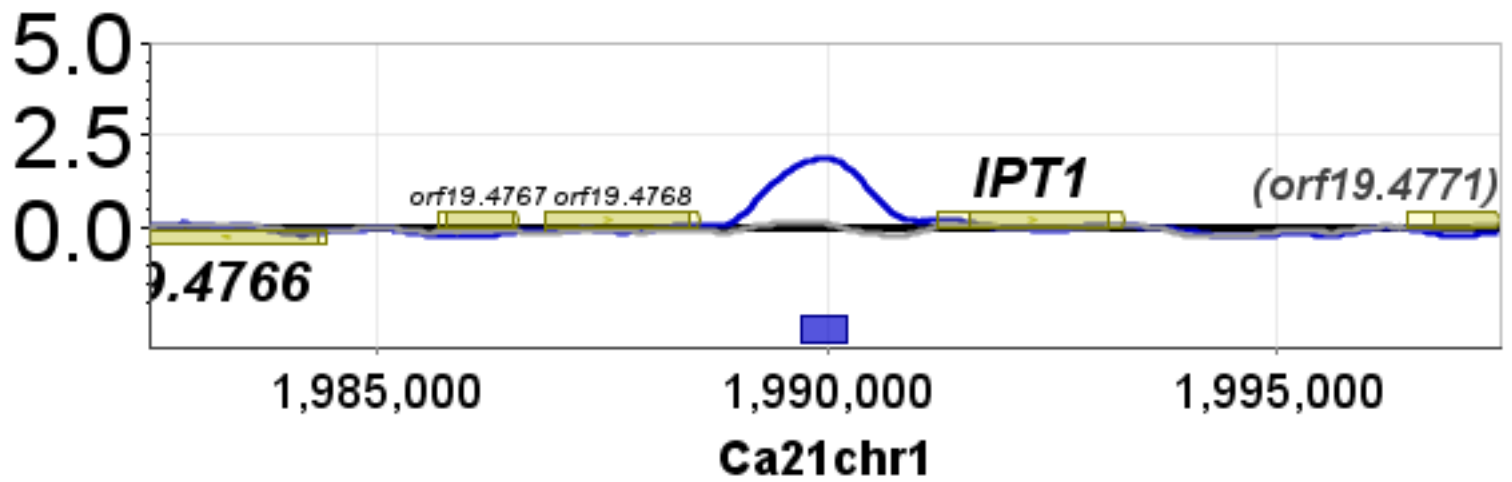

[1.889] Ca21chr1:1082750-1097749 [+] [ntar\_104, orf19.449, orf19.450, orf19.448, ntar\_105]

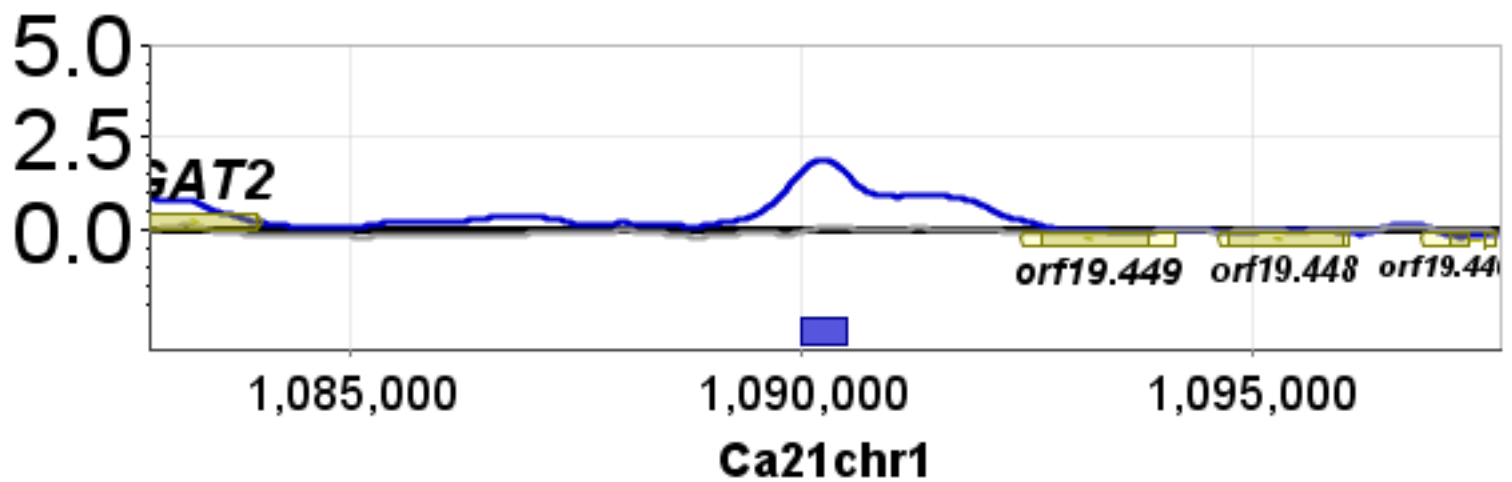

[1.878] Ca21chr3:1108830-1123829 [+] [WOR2, ntar\_614, ntar\_615, ntar\_616, ntar\_617]

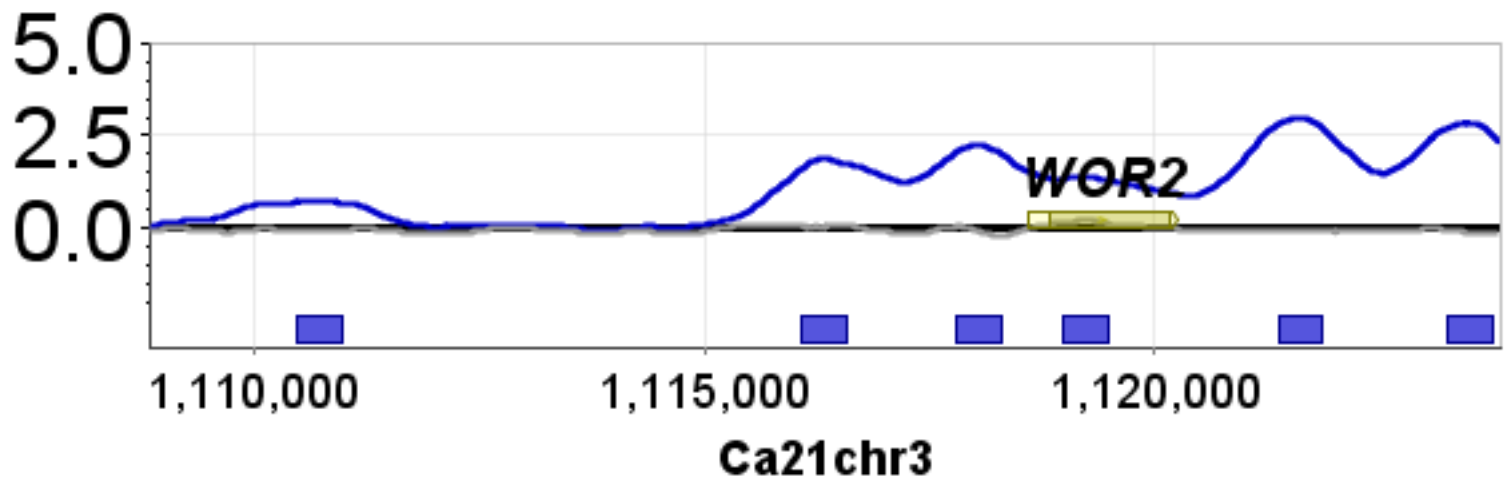

[1.876] Ca21chr5:763138-778137 [+] [ite(uuc)5, orf19.2638, orf19.2639, orf19.2639.1, FUR1]

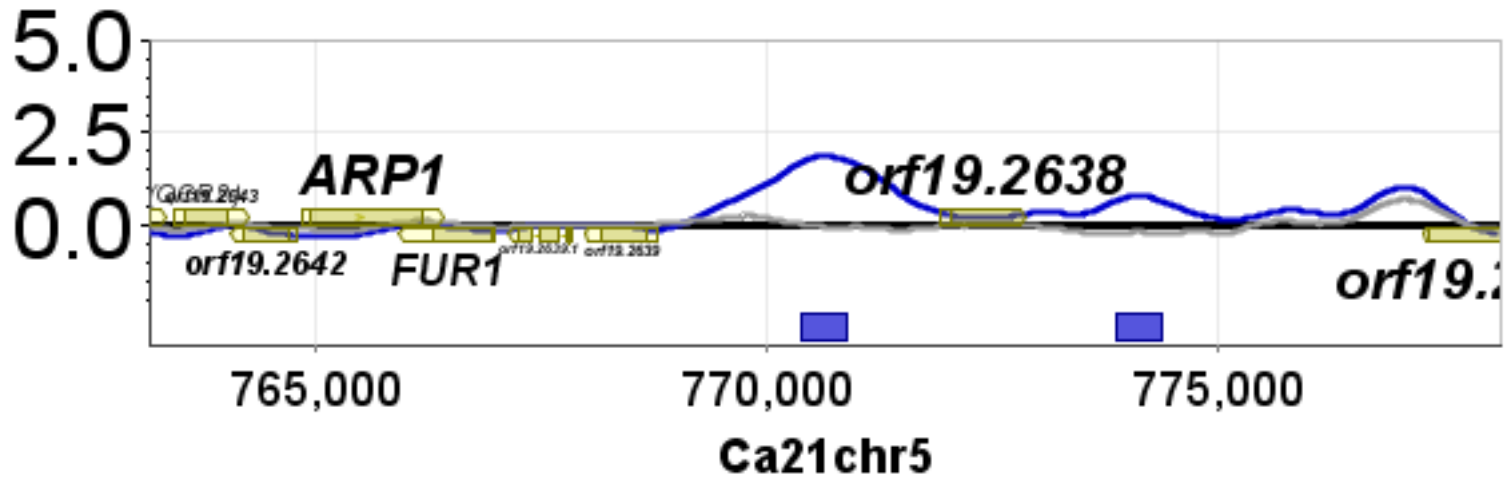

[1.858] Ca21chr4:462626-477625 [+] [PGA59, ntar\_757, ntar\_756, ntar\_755, ntar\_758]

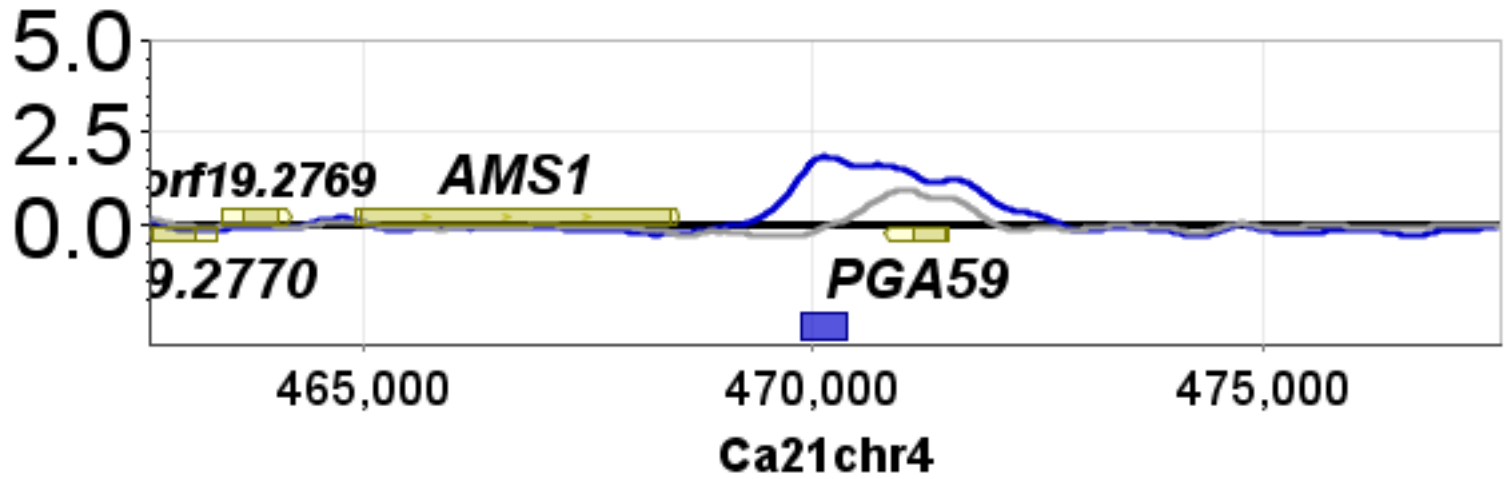

[1.815] Ca21chr3:1467705-1482704 [+] [ntar\_658, ntar\_659, AAF1, ECM15, ntar\_660]

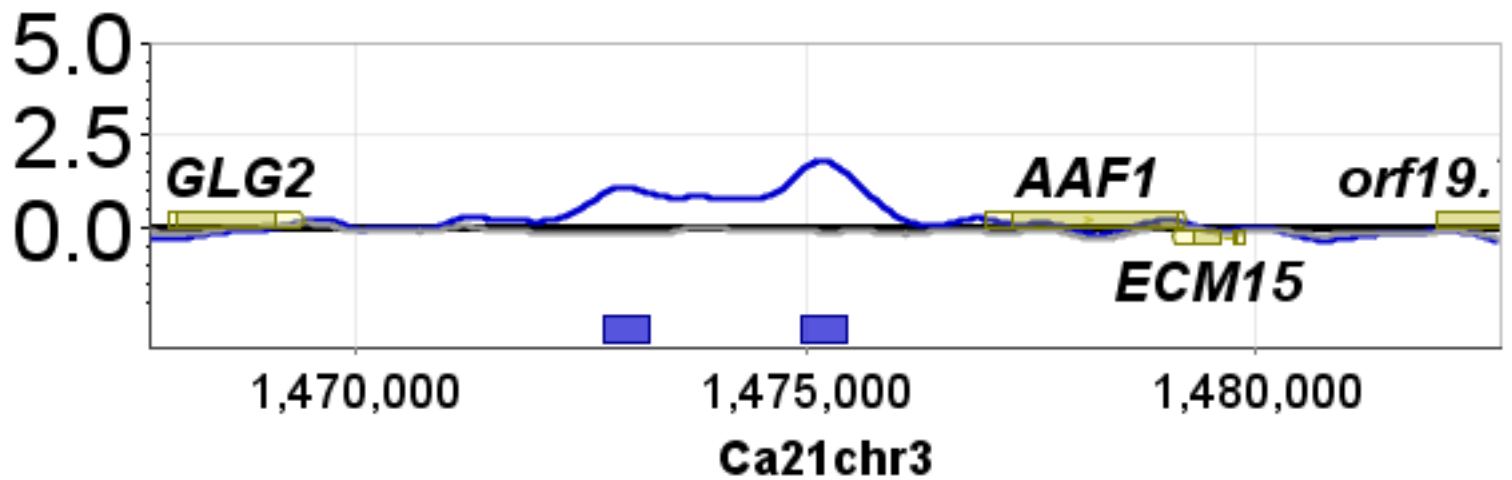



[1.812] Ca21chr6:121393-136392 [+] [ntar\_973, ntar\_972, FAT1, orf19.3655, COX15]

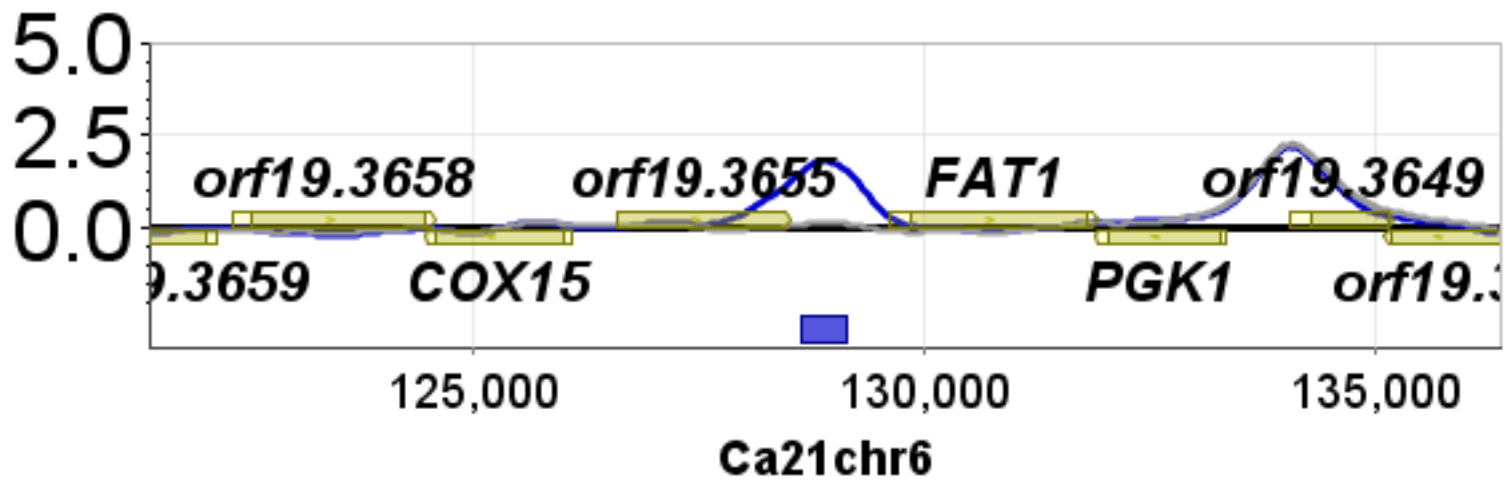

[1.797] Ca21chr7:717769-732768 [+] [ntar\_1137, ntar\_1136, LIP8, ntar\_1134, ntar\_1135]

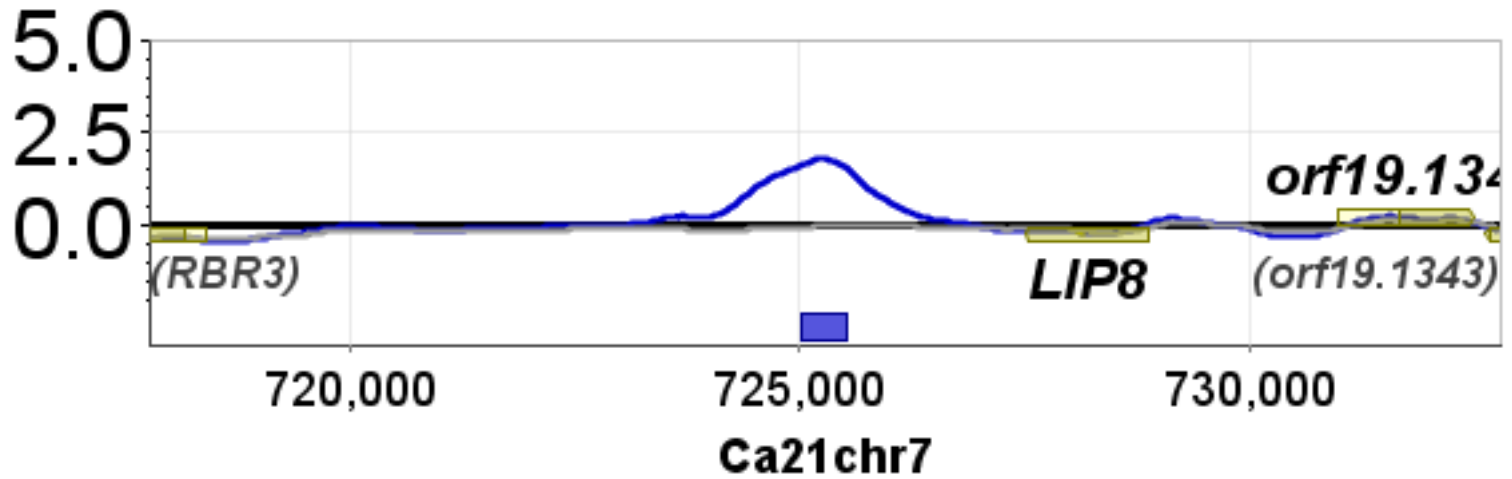

[1.789] Ca21chrR:589042-604041 [+] [RFG1, ntar\_1219]

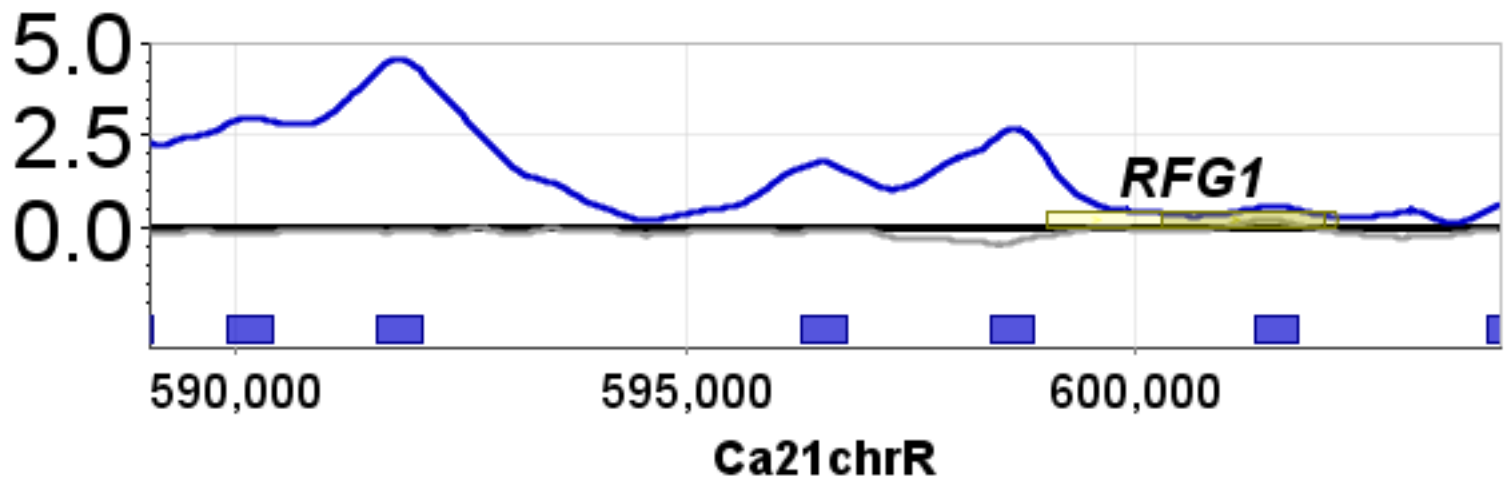

[1.788] Ca21chrR:259545-274544 [+] [ntar\_1179.1, ntar\_1179.2, ntar\_1178, ntar\_1180, ntar\_1179.3]

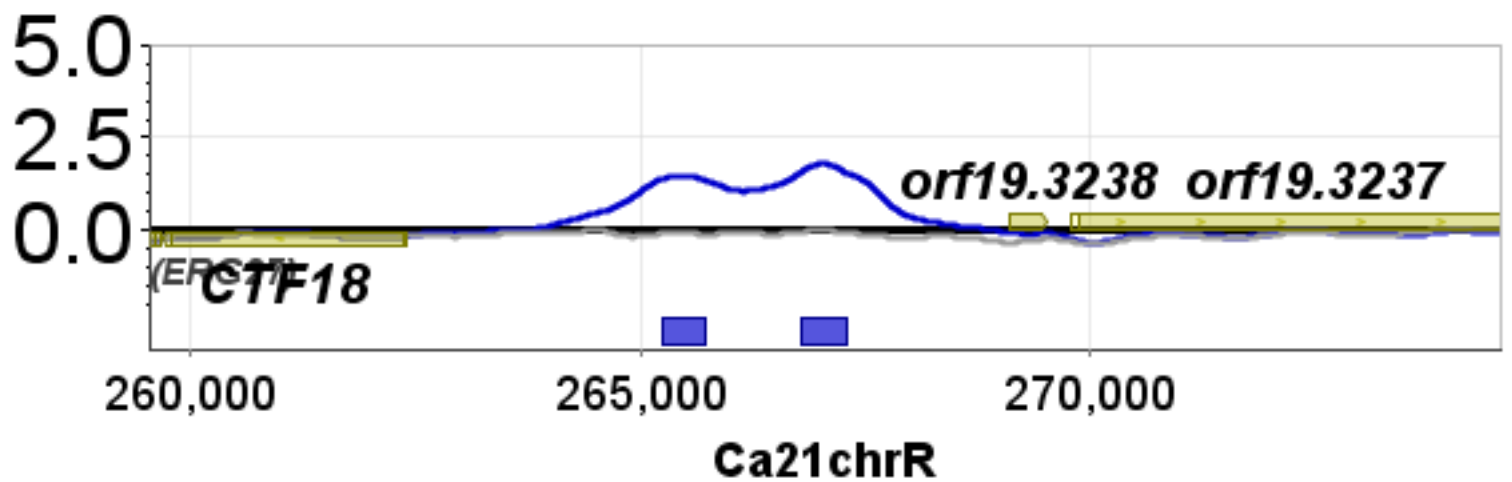

[1.769] Ca21chr1:443910-458909 [+] [orf19.3671, GAL1, GAL10, orf19.3673, ntar\_43]

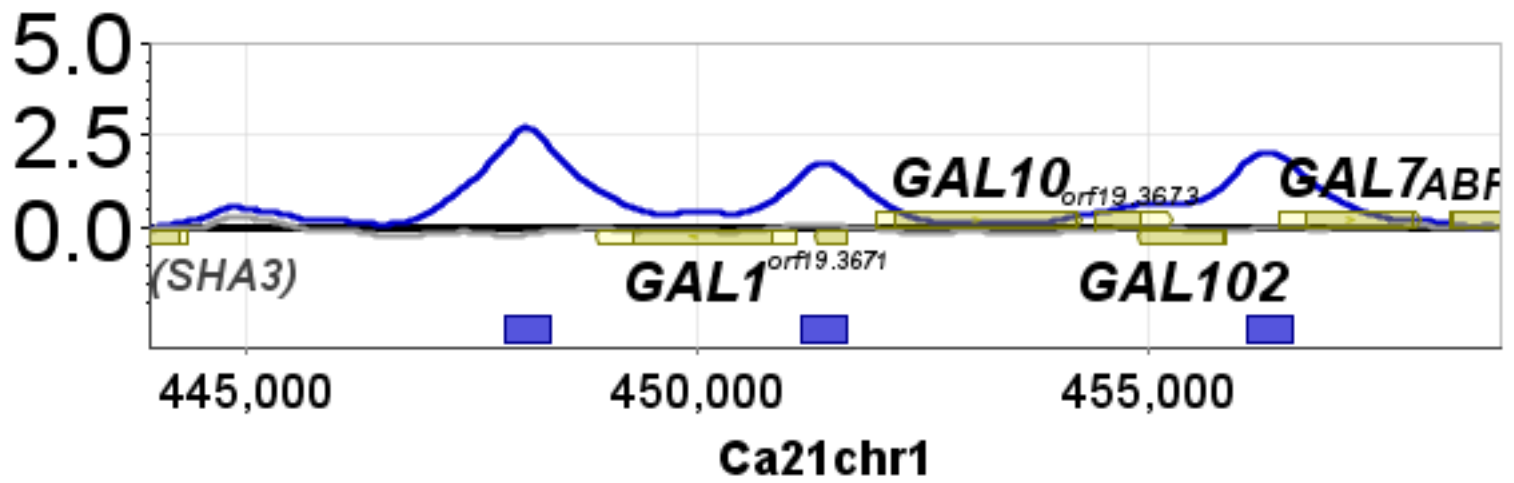

[1.765] Ca21chr2:1734426-1749425 [+] [ntar\_446, ntar\_447, ntar\_445, ntar\_448, orf19.3621]

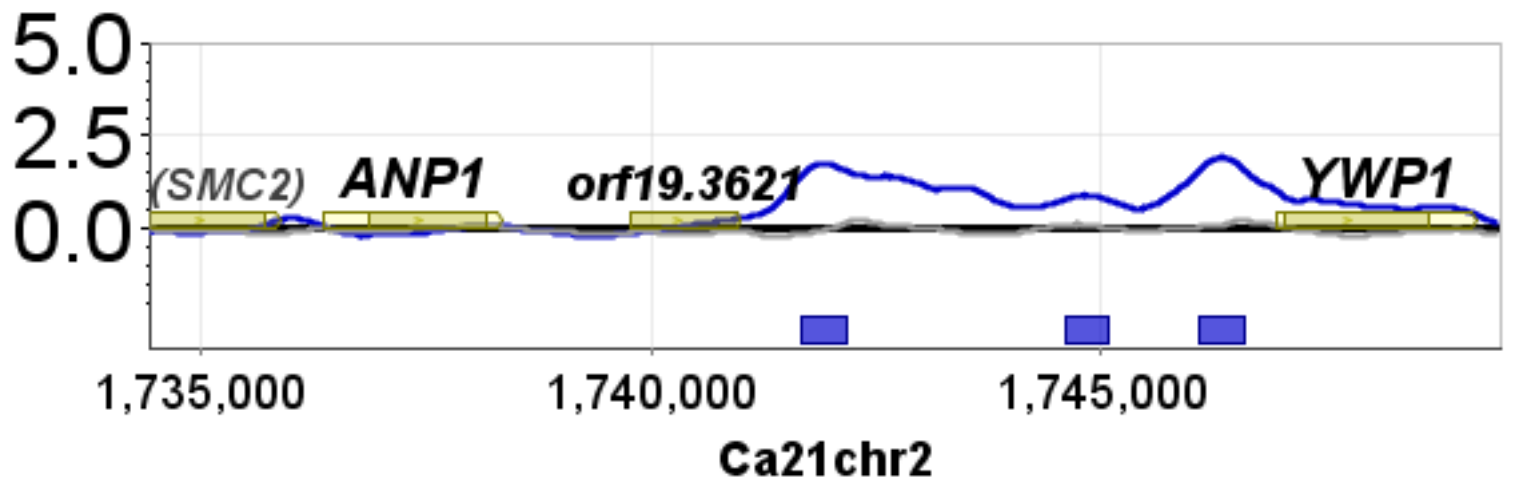

[1.764] Ca21chr3:1715138-1730137 [+] [orf19.6736, ntar\_685, orf19.6737, tf(gaa)5, tr(ucu)5]

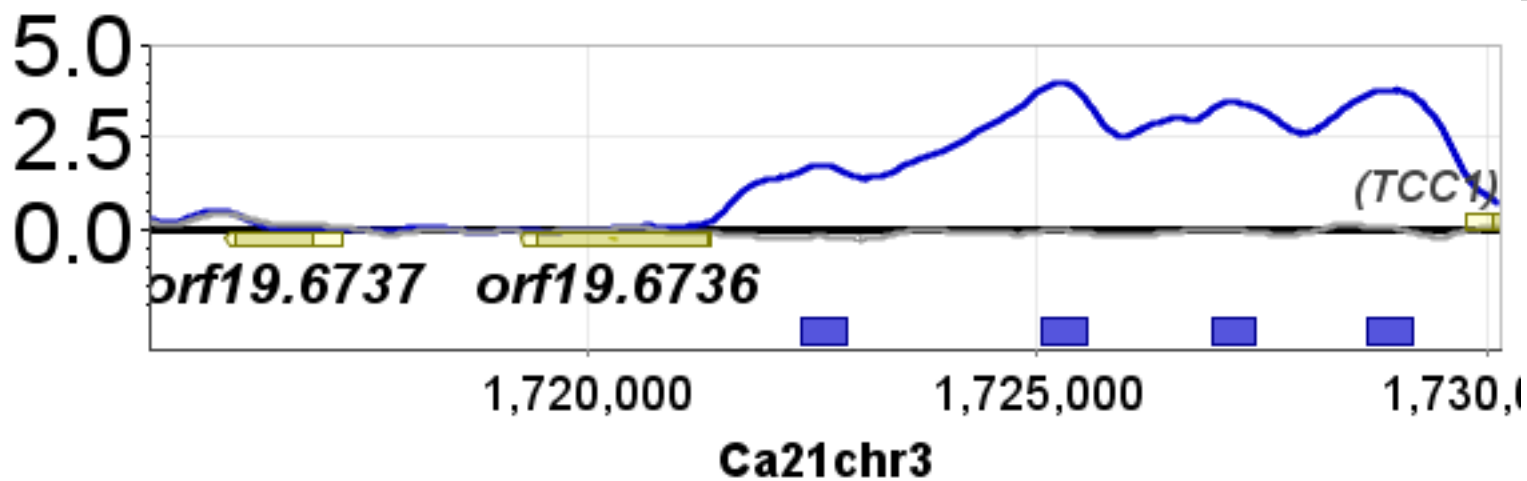

[1.762] Ca21chr4:270047-285046 [+] [ntar\_734, PGA53, ntar\_733, ntar\_735, orf19.4652]

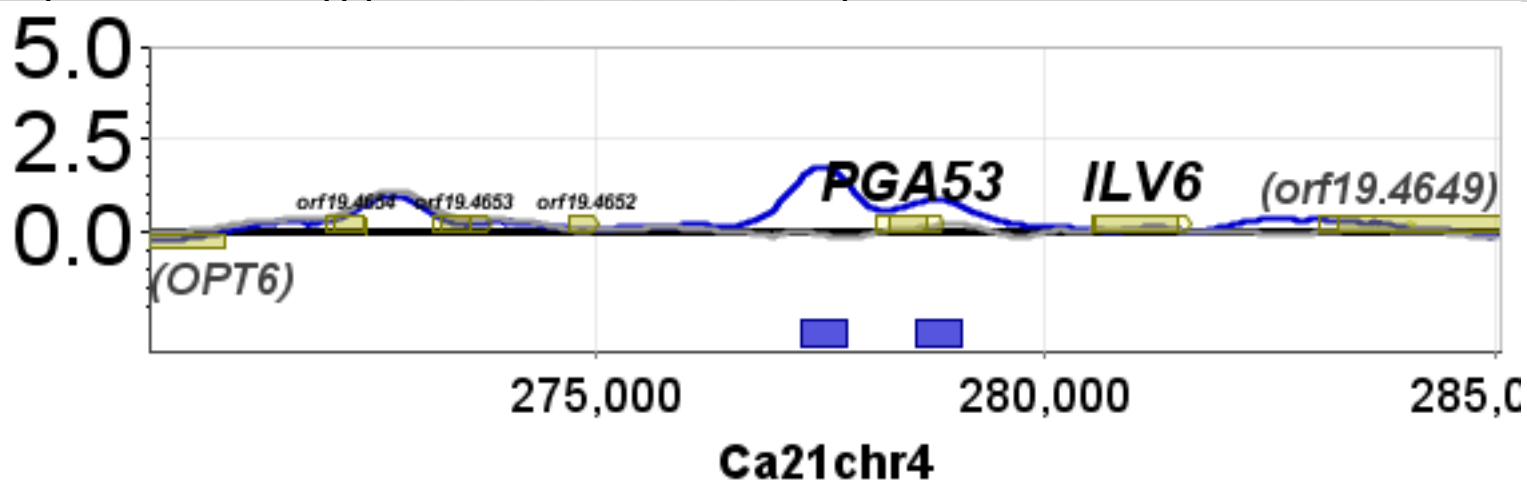

[1.743] Ca21chr1:2933648-2948647 [+] [orf19.4972, HYR1, orf19.4970]

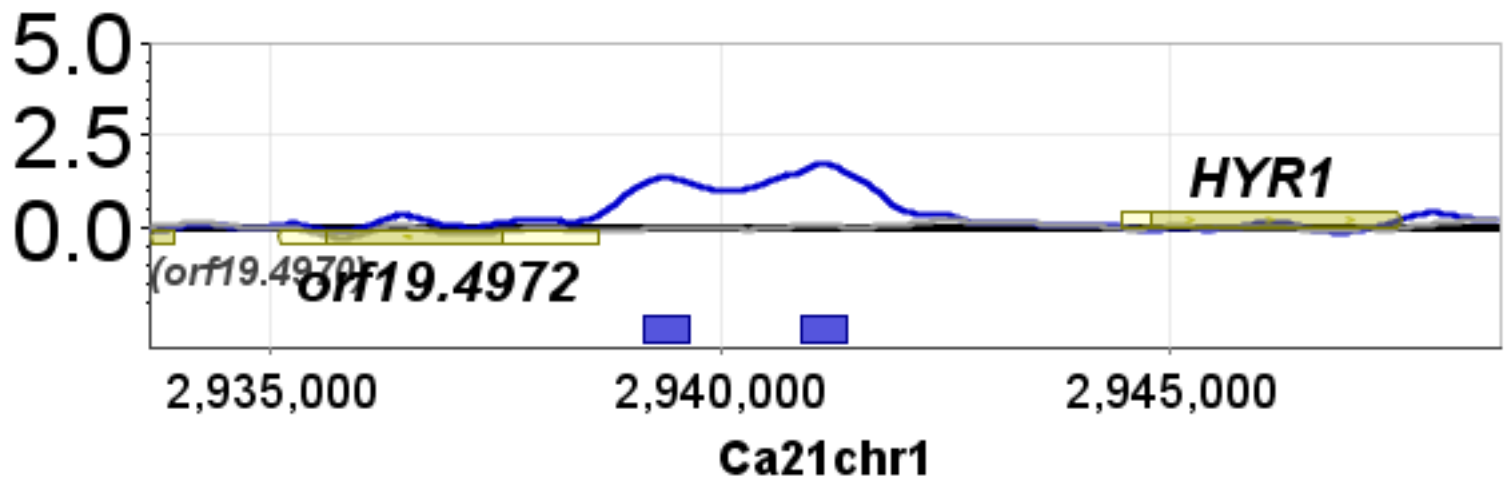

[1.696] Ca21chr5:916955-931954 [+] [orf19.3897, ntar\_941, CHT2, orf19.3898, SDC1]

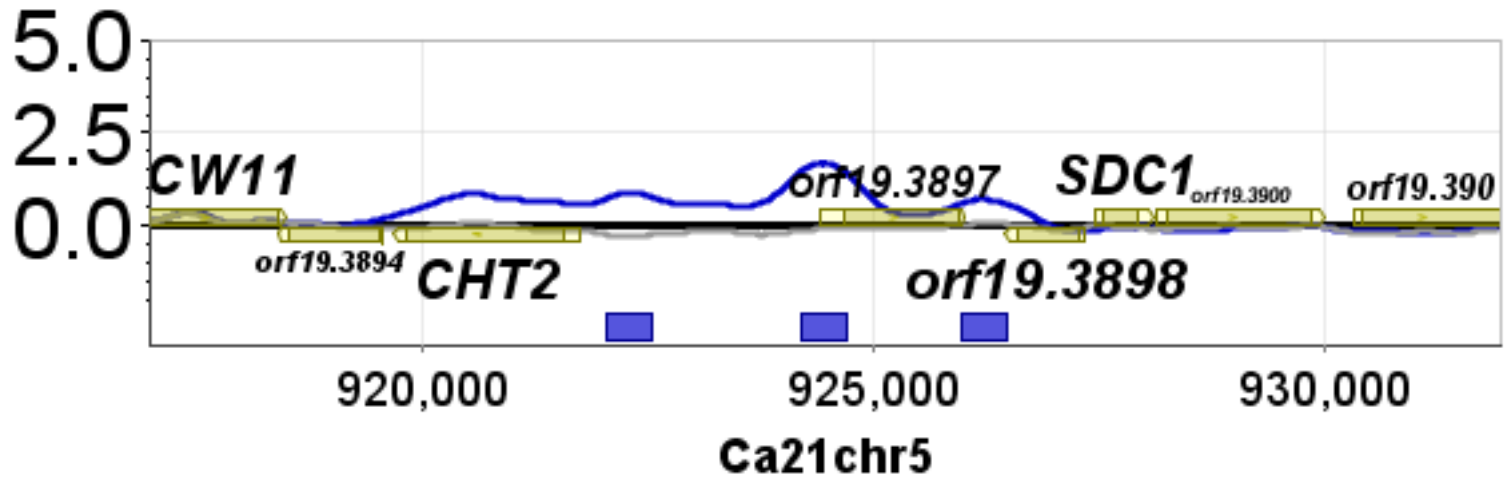

[1.693] Ca21chr7:440768-455767 [+] [ntar\_1102, ntar\_1103, CUP9, ntar\_1101, HSP90]

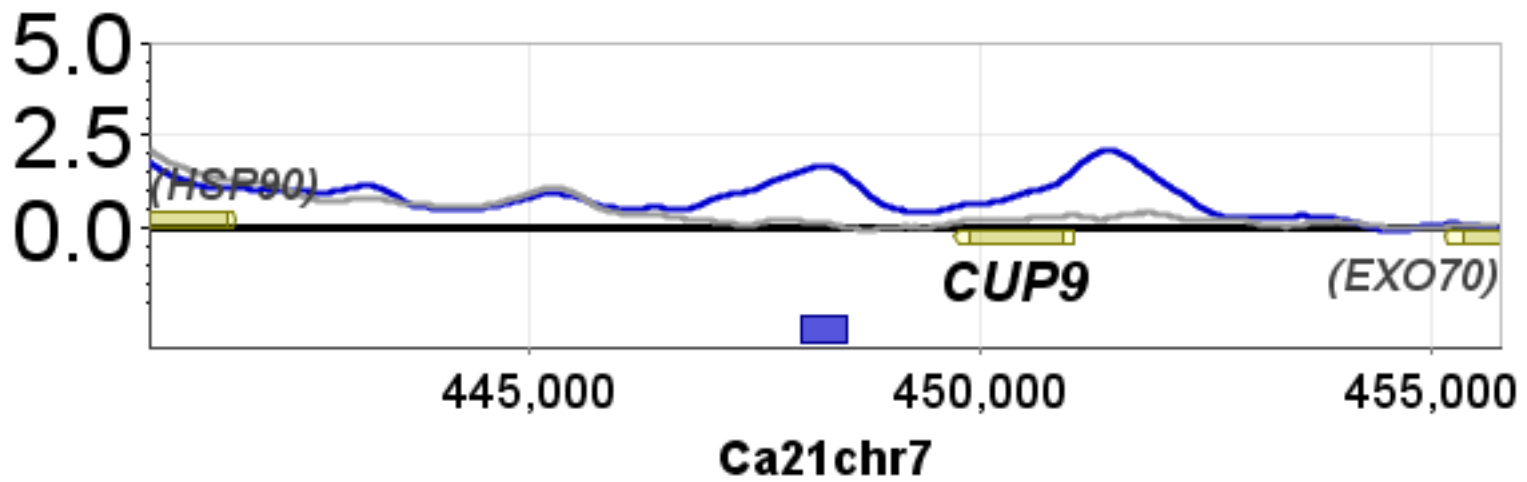

[1.677] Ca21chrR:1714297-1729296 [+] [EFG1, ntar\_1352, ntar\_1353, ntar\_1351, orf19.609]

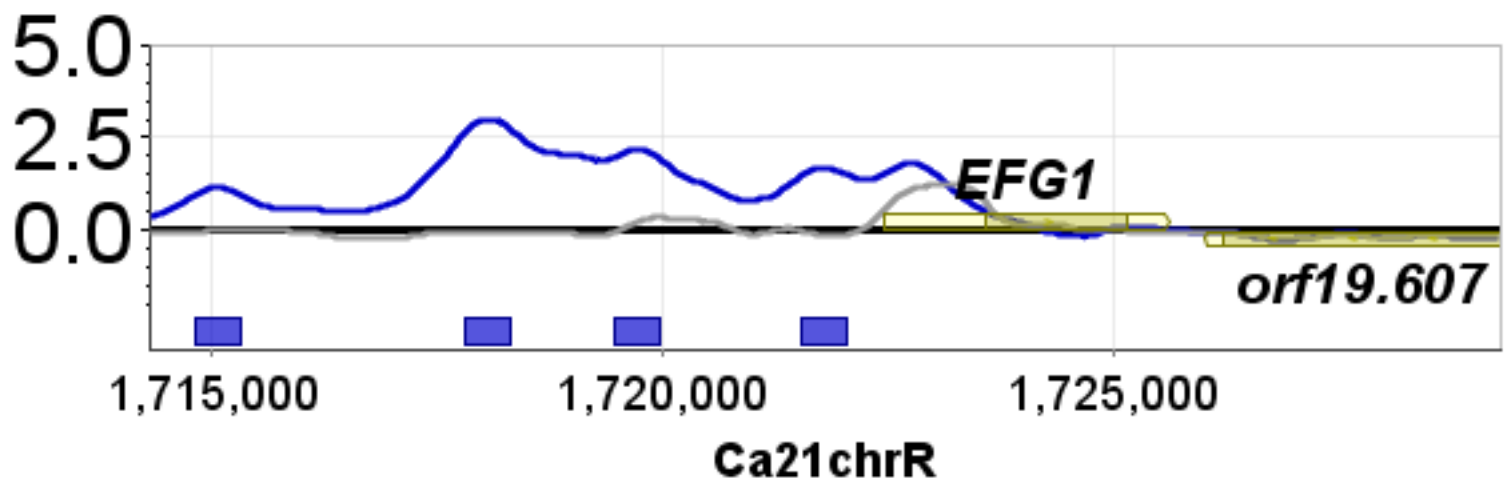

[1.667] Ca21chr5:648030-663029 [+] [orf19.4321, ntar\_909, orf19.4320, ntar\_908, DAP2]

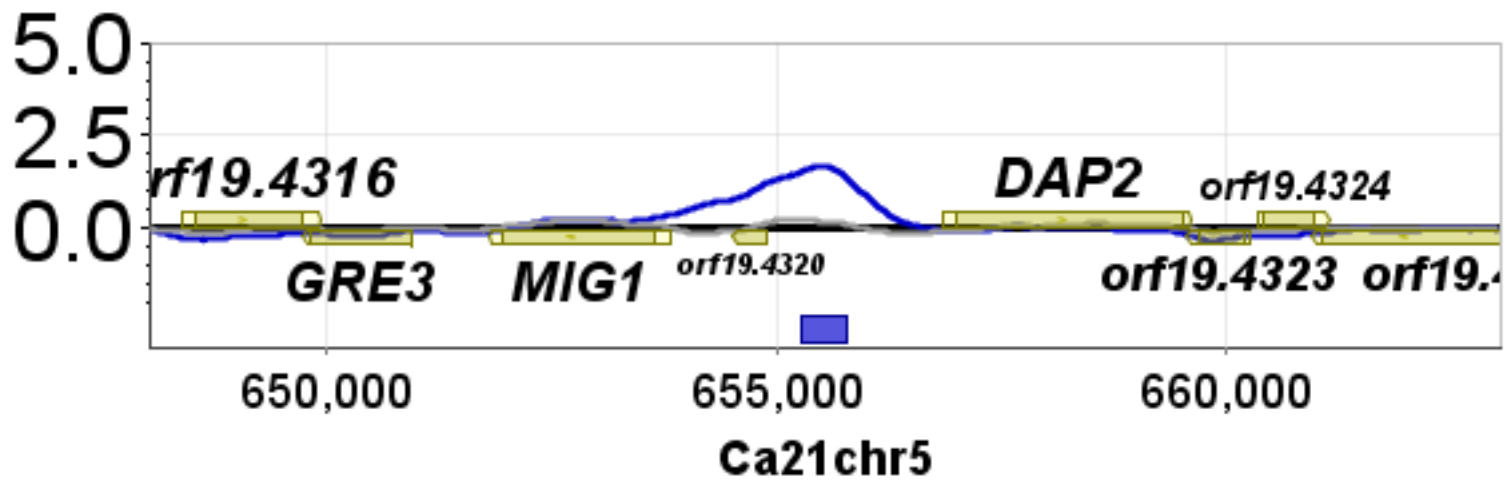

[1.63] Ca21chr1:291476-306475 [+] [orf19.3337, orf19.3338, orf19.3336, SOD2, orf19.3335]

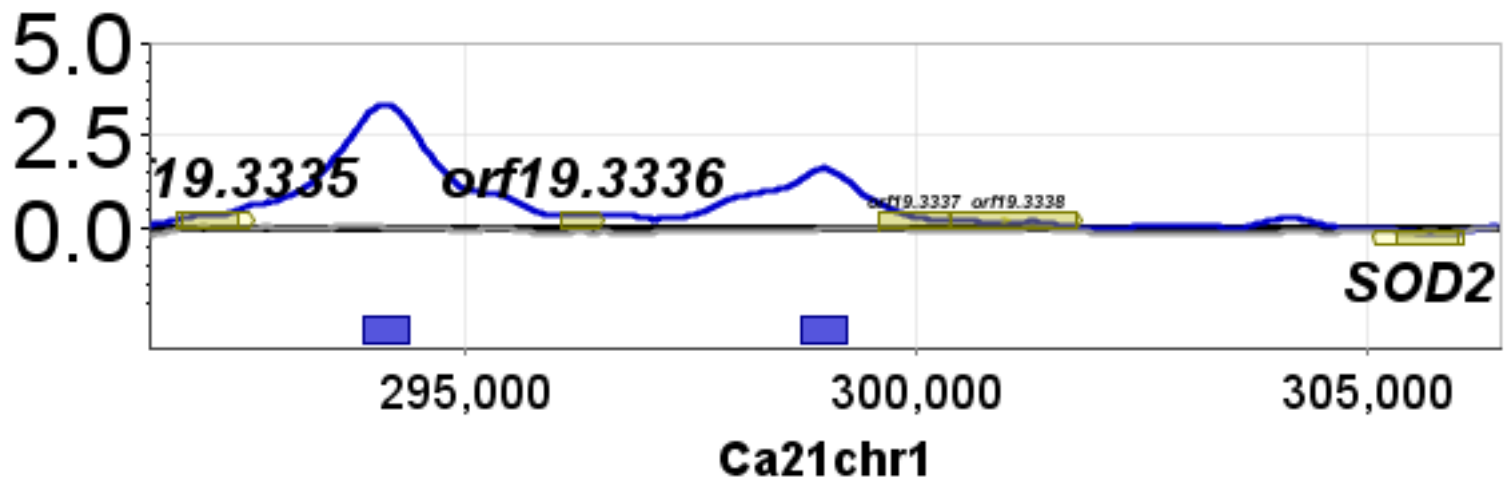

[1.62] Ca21chrR:2103624-2118623 [+] [BET2, DEF1, DPB2, GNP3]

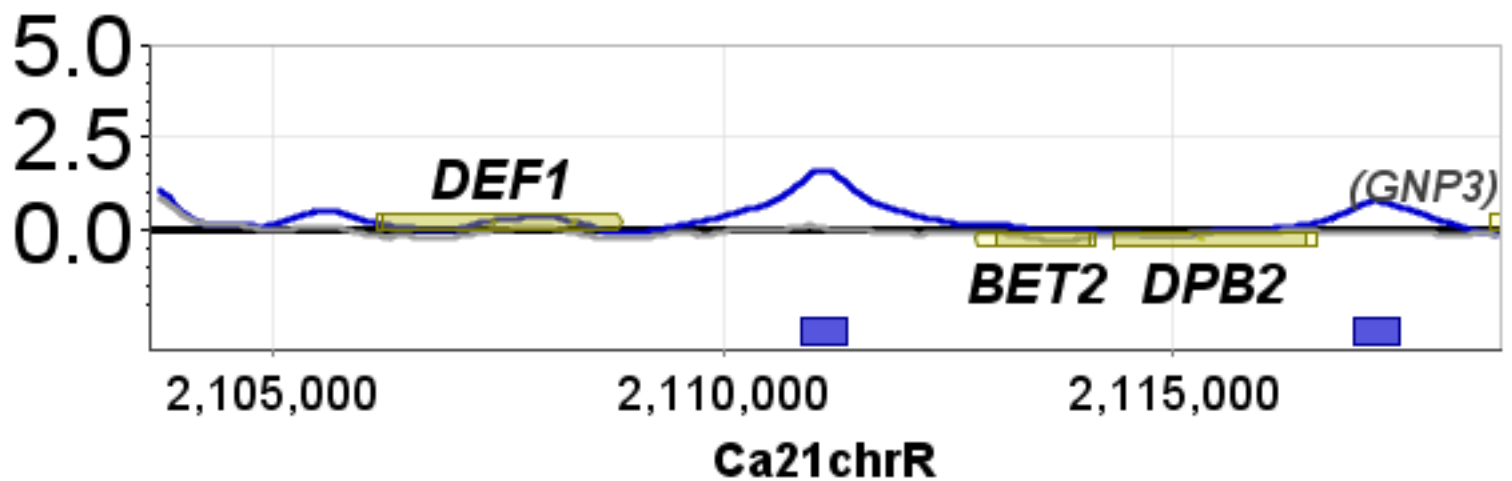

[1.615] Ca21chr1:3102442-3117441 [+] [RBE1, RPL4B, ntar\_278, FTR1, orf19.7216]

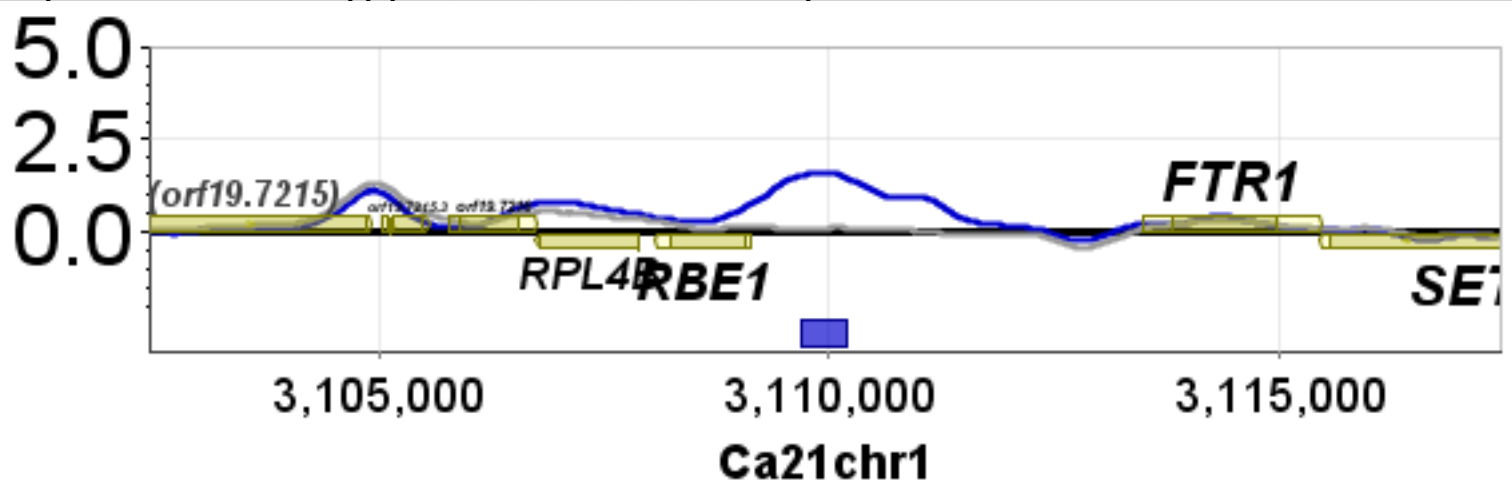

[1.597] Ca21chr1:1218113-1233112 [+] [orf19.2459, orf19.2460, PRN4, orf19.2458, PRN3]

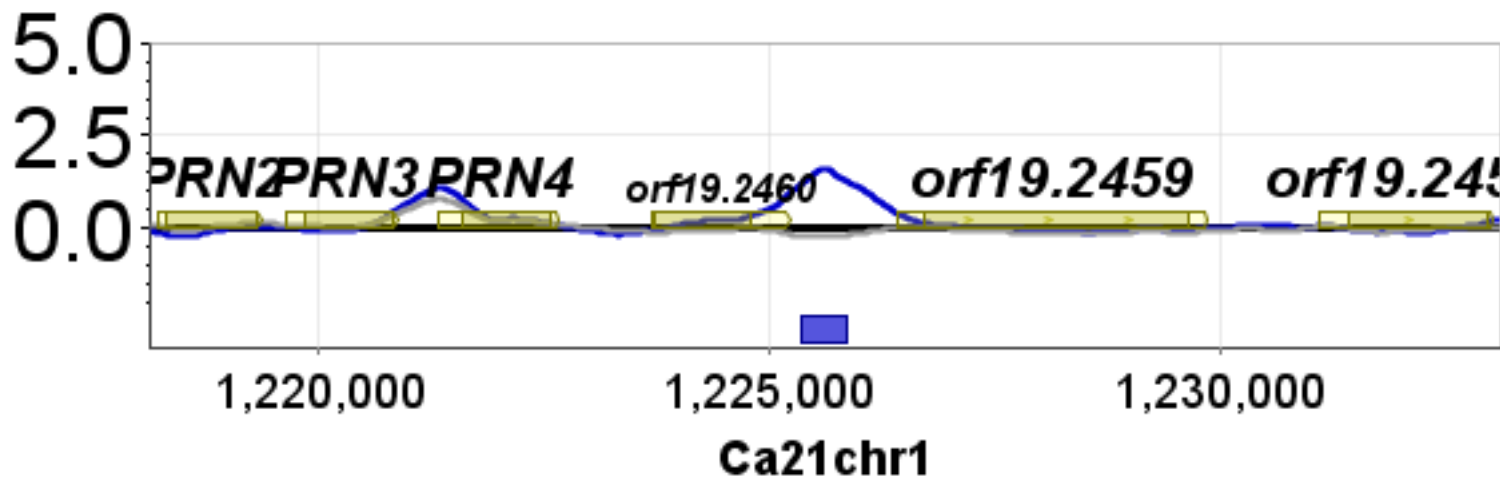

[1.587] Ca21chr1:532117-547116 [+] [HNM4, PUT4, ntar\_58, ntar\_57, ntar\_56]

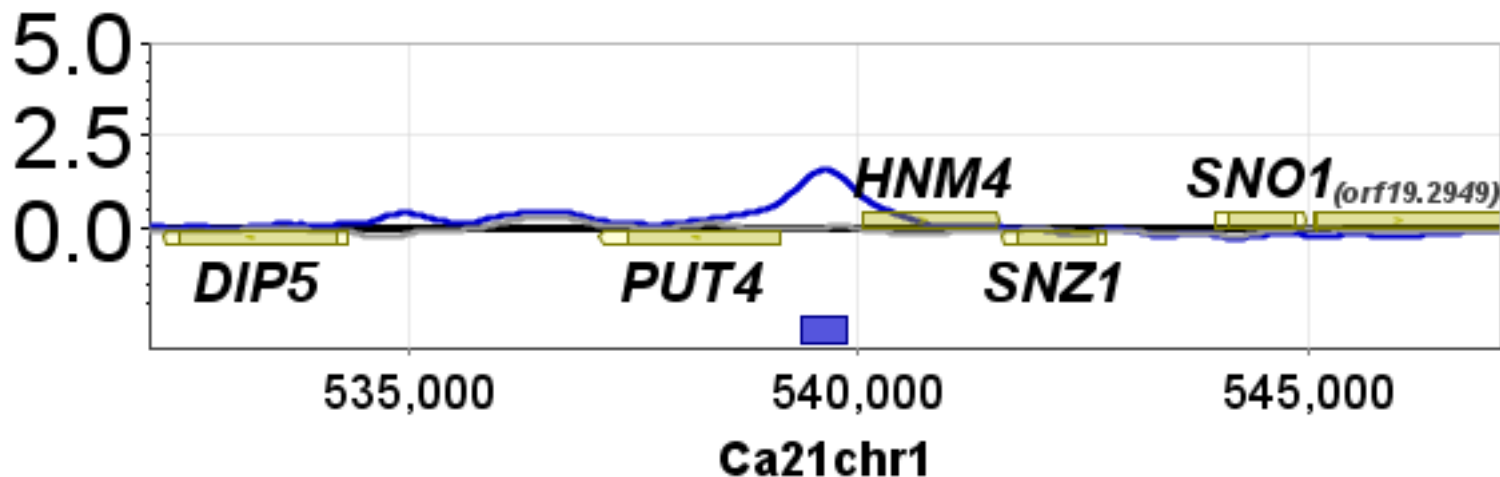

[1.57] Ca21chr1:1327697-1342696 [+] [ntar\_127, orf19.177, orf19.6280]

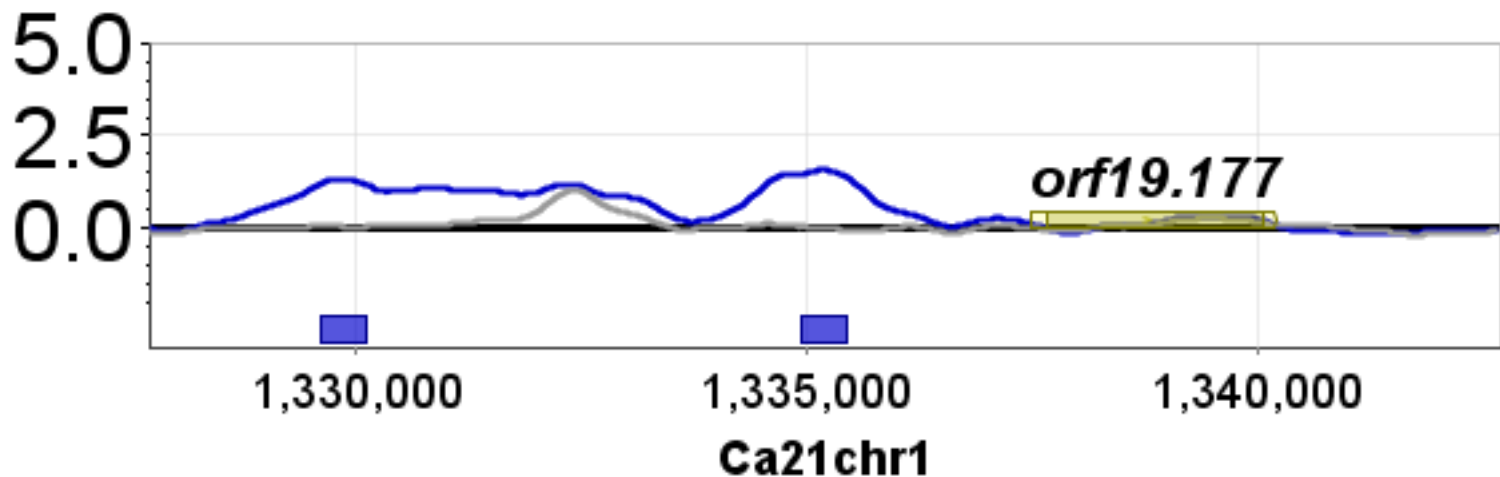

[1.538] Ca21chr7:357471-372470 [+] [orf19.6556, ntar\_1094, ntar\_1093, orf19.6555, orf19.6554]

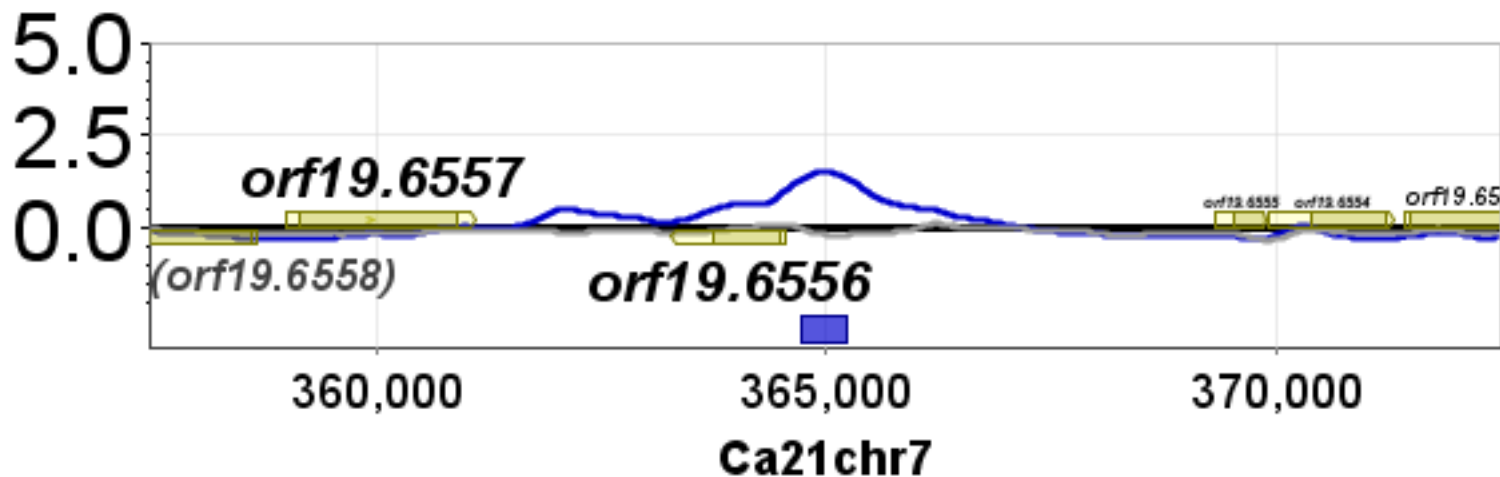

[1.525] Ca21chr1:135339-150338 [+] [HGC1, ntar\_15, ntar\_16, ROT1]

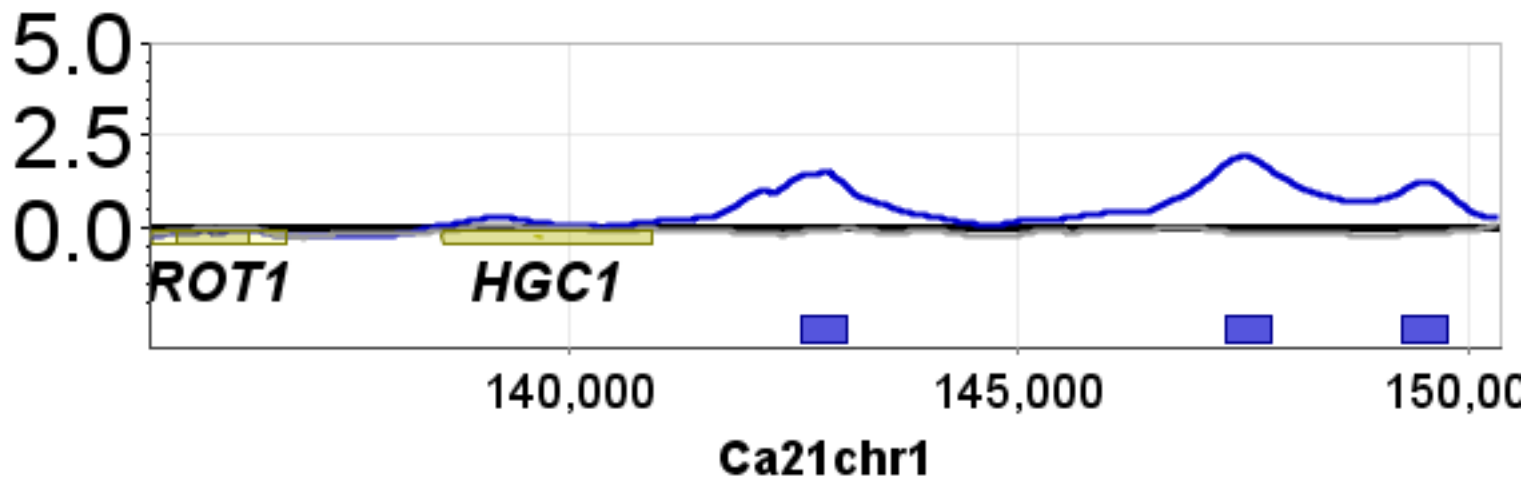

[1.524] Ca21chr3:995516-1010515 [+] [orf19.5933, orf19.5934, orf19.5932, orf19.5935, orf19.5931]

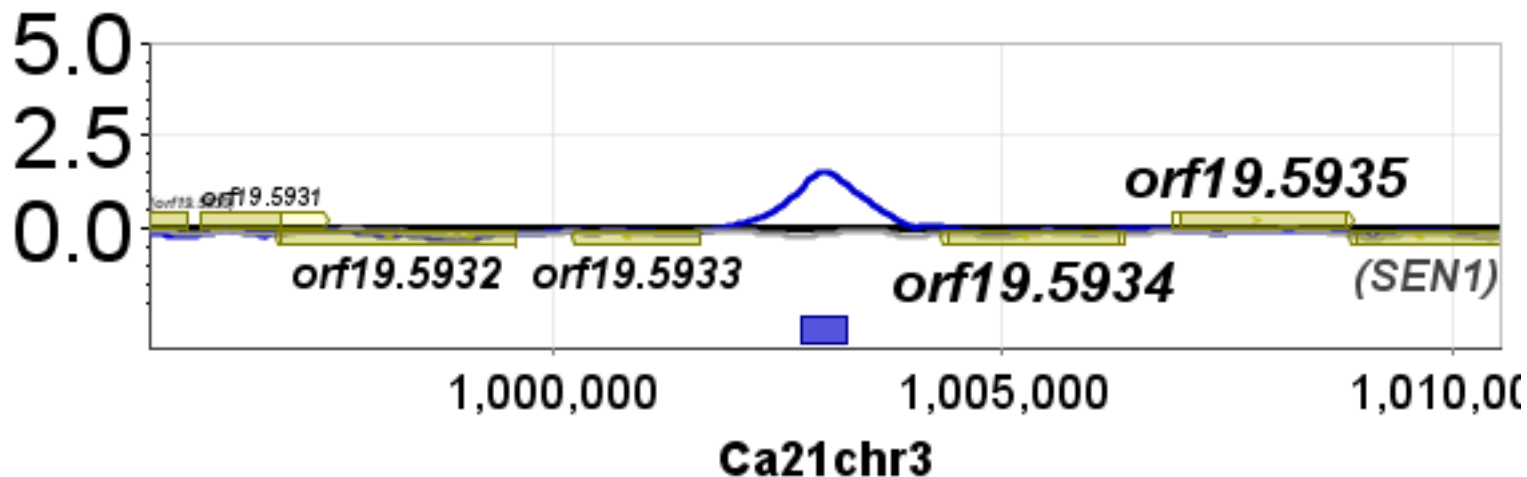

[1.51] Ca21chr2:1138026-1153025 [+] [ts(aga)4, orf19.6873.1, RPS8A, orf19.6874, ntar\_395]

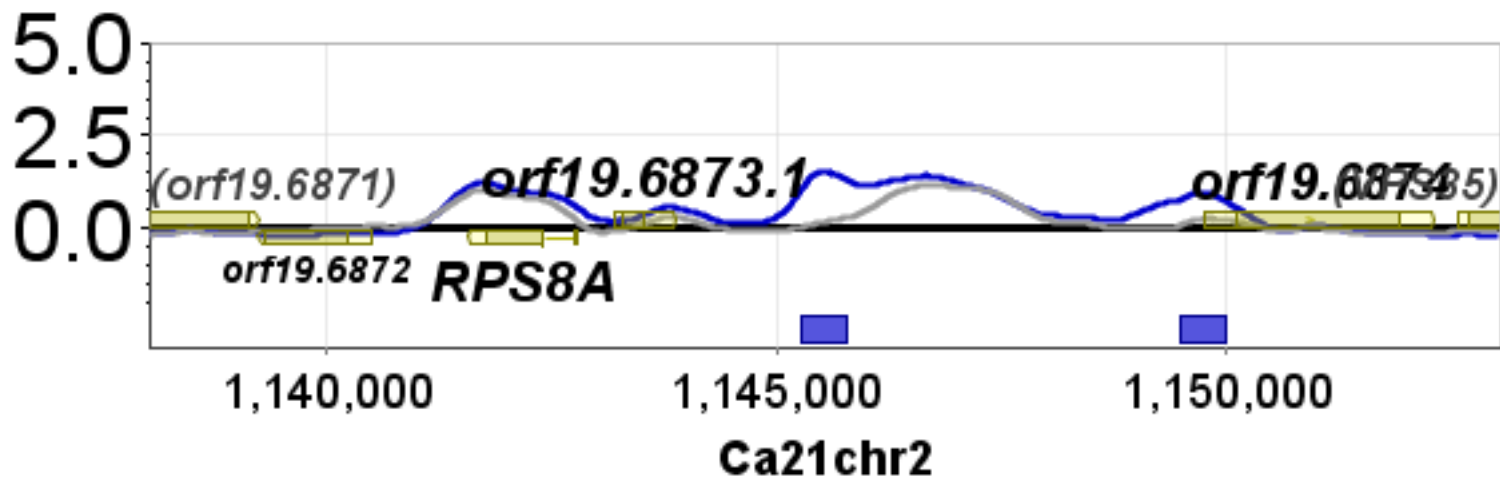

[1.51] Ca21chrR:2073866-2088865 [+] [ntar\_1394.5, ntar\_1395, IFA14, ntar\_1396, ntar\_1396.5]

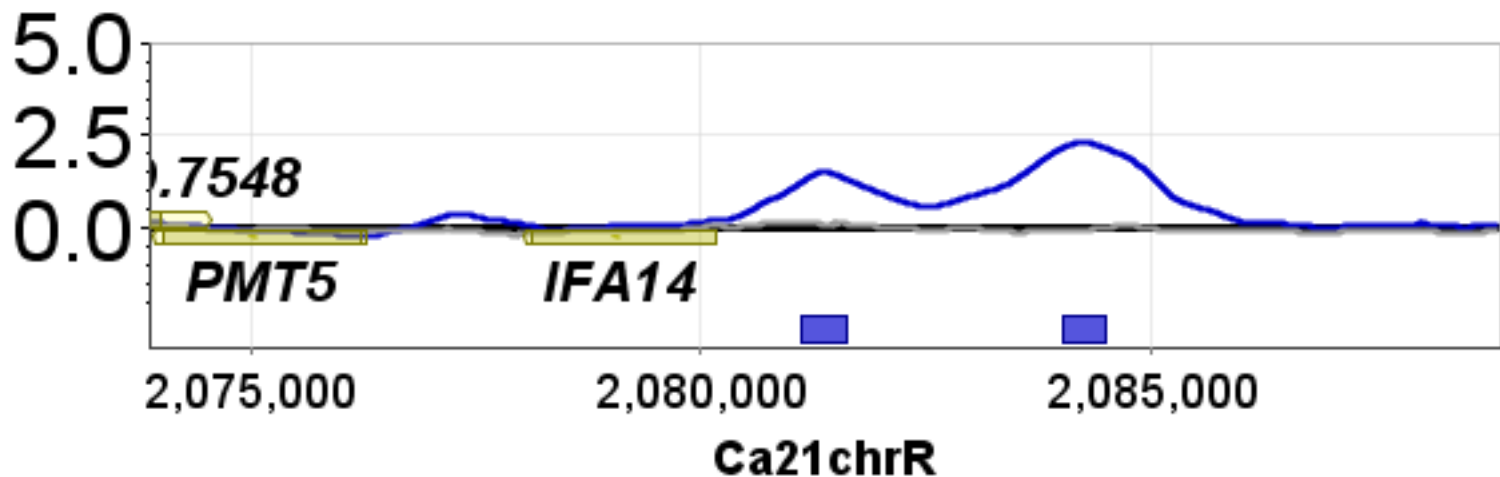

[1.493] Ca21chr1:2226242-2241241 [+] [MIR1, WOR1, orf19.4886, ECM21]

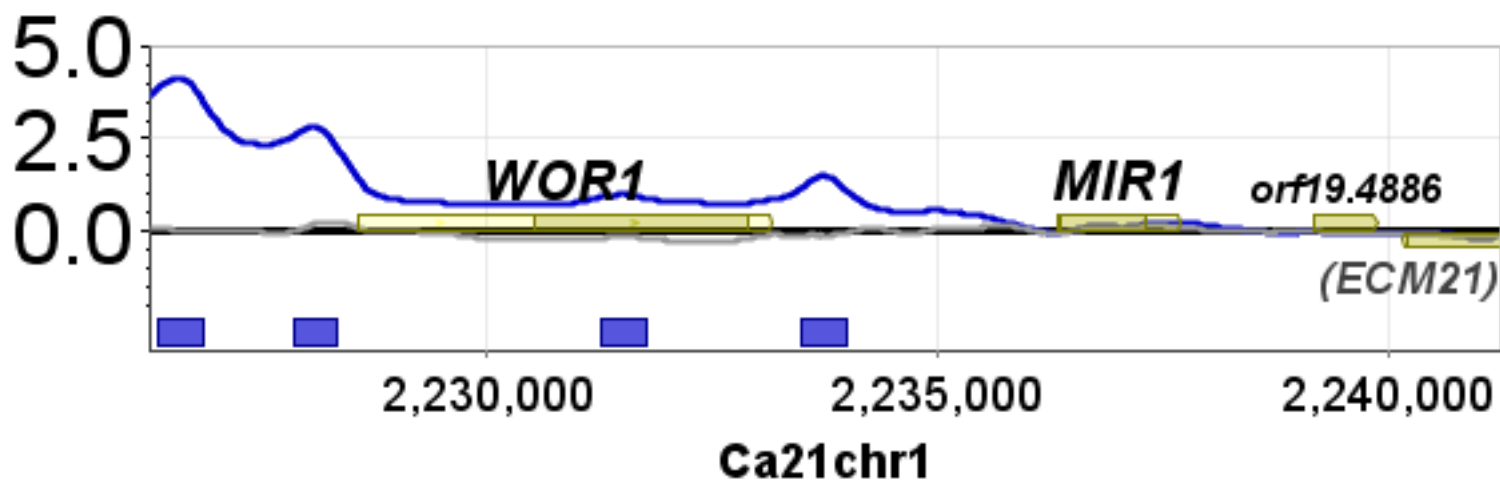

[1.476] Ca21chr4:856555-871554 [+] [JEN2, orf19.5308, orf19.5306, RHD3, orf19.5304]

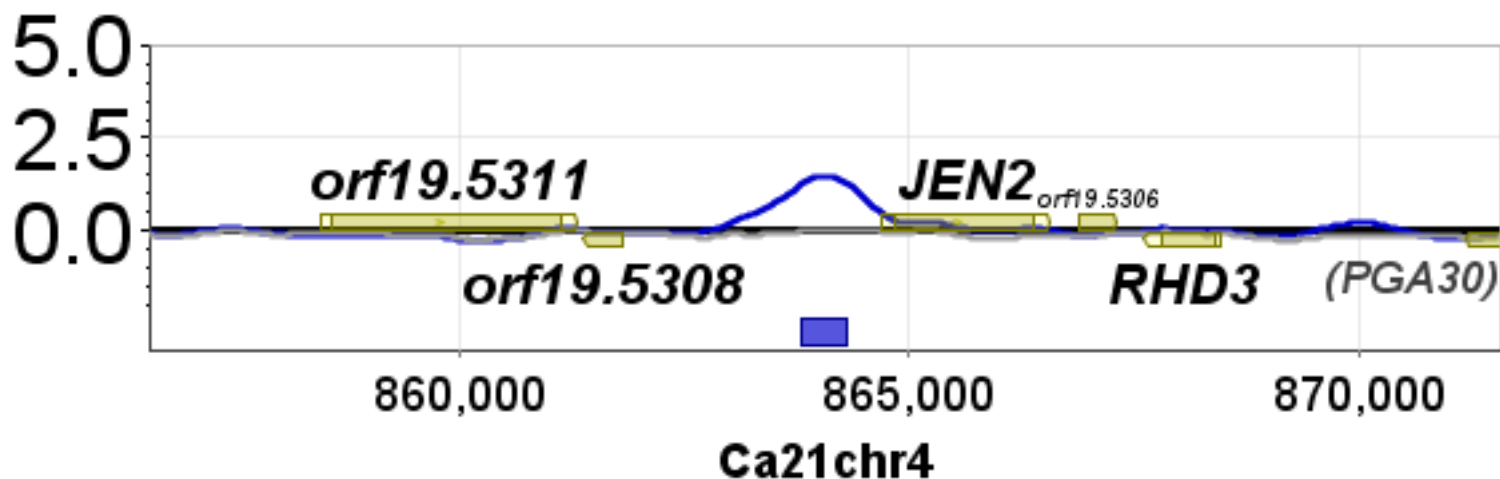

[1.464] Ca21chrR:257990-272989 [+] [ntar\_1177, ntar\_1178, ntar\_1176, ntar\_1175.5, ntar\_1179.1]

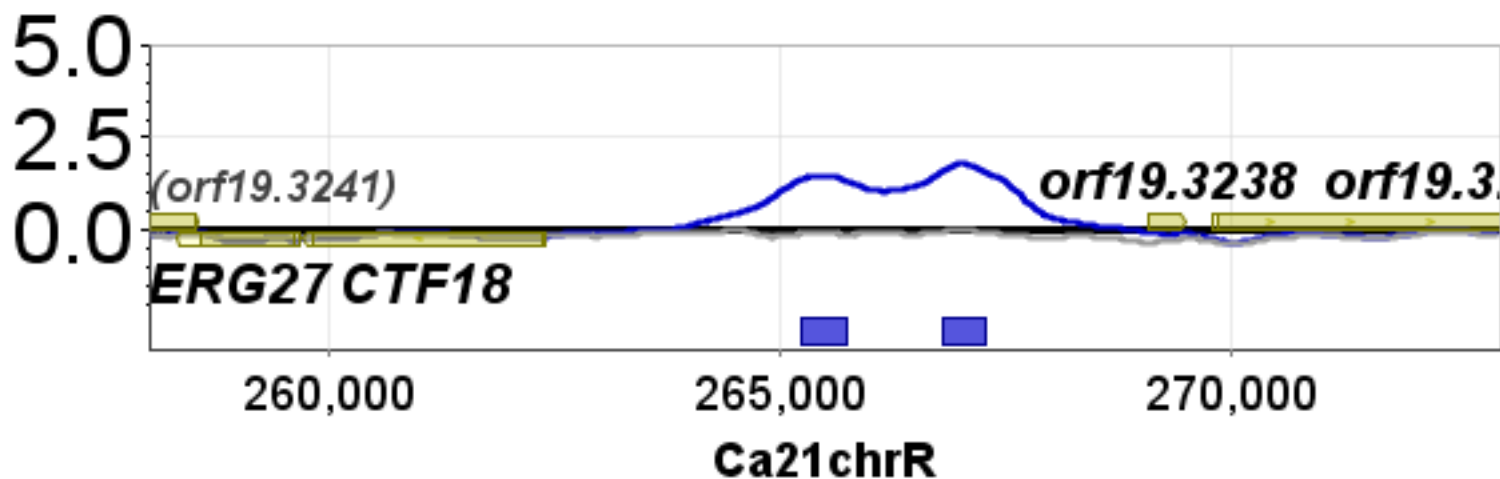

[1.457] Ca21chr5:239719-254718 [+] [CLN3, ntar\_865, ntar\_864, orf19.1959]

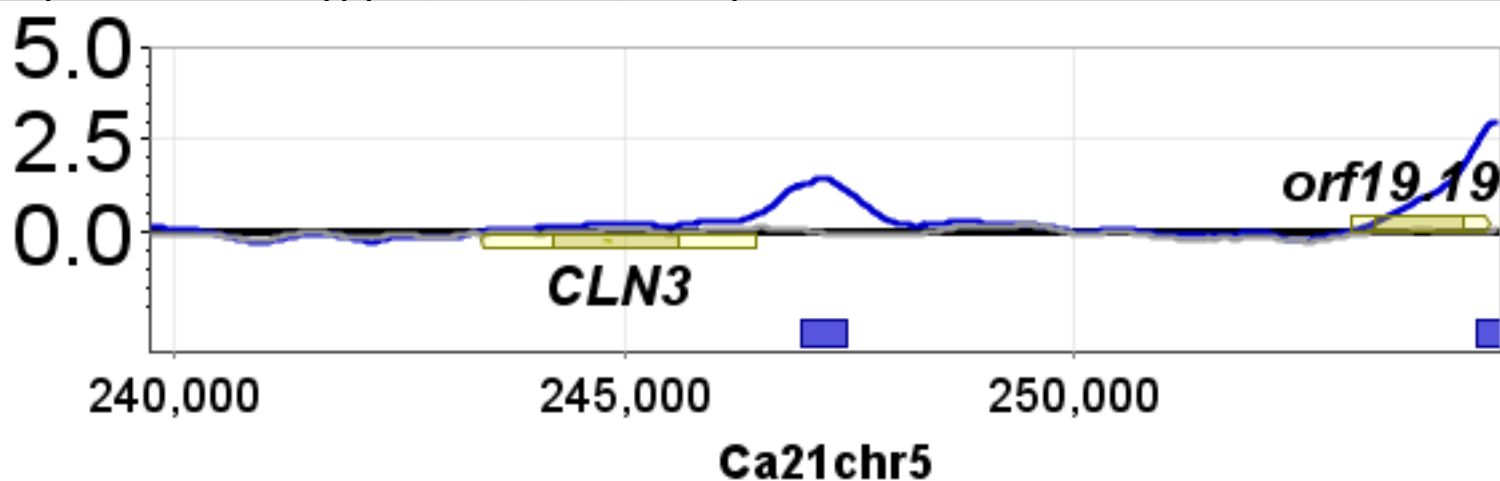

[1.442] Ca21chrR:869695-884694 [+] [orf19.467, ntar\_1253, ntar\_1254, ntar\_1255, HST7]

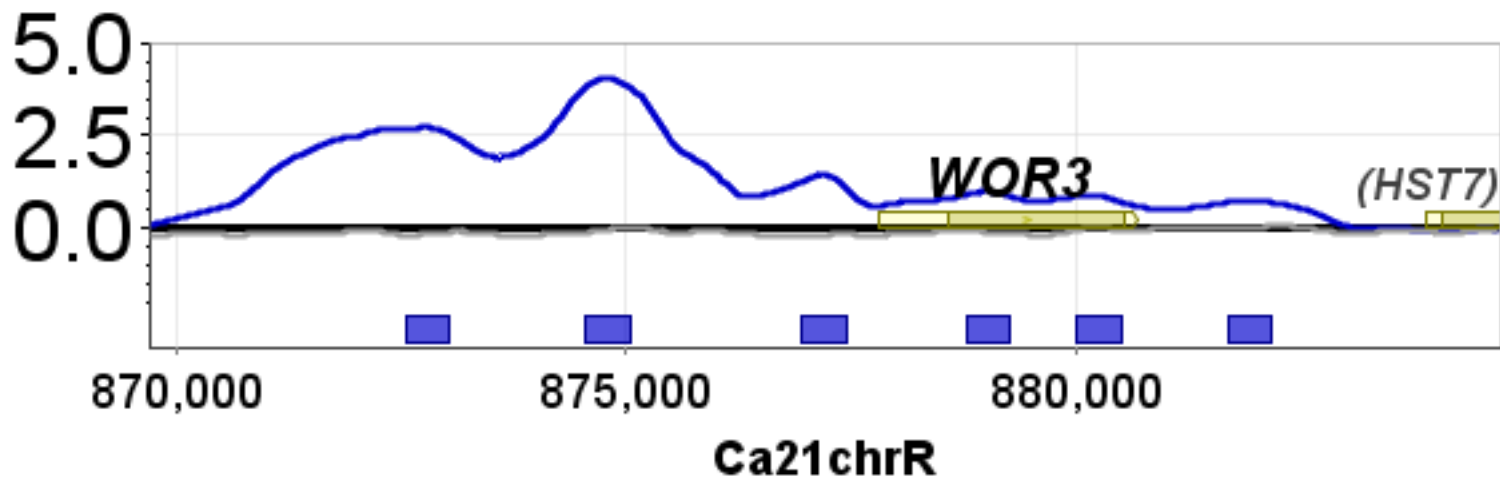

[1.438] Ca21chr1:2513390-2528389 [+] [PHO84, DPP1, ntar\_240, ntar\_241, ntar\_239]

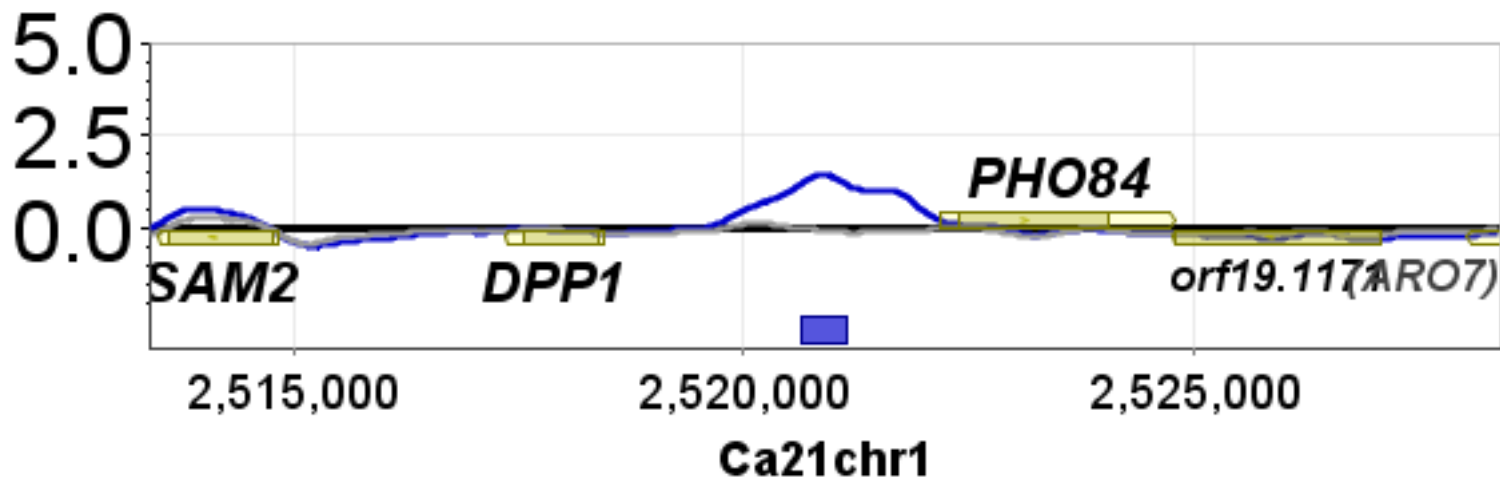

[1.432] Ca21chr4:165492-180491 [+] [ntar\_722, ntar\_723, PTC8, orf19.4699, orf19.4701]

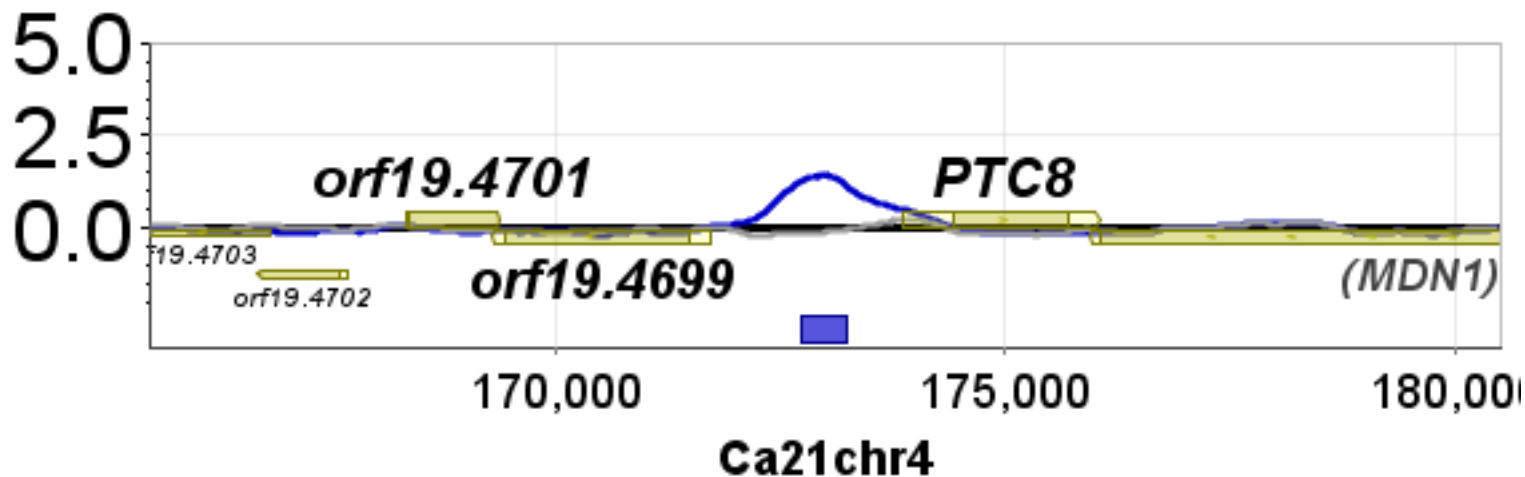

[1.427] Ca21chr6:758240-773239 [+] [orf19.5728, FGR17, orf19.5727, orf19.5725, orf19.5730]

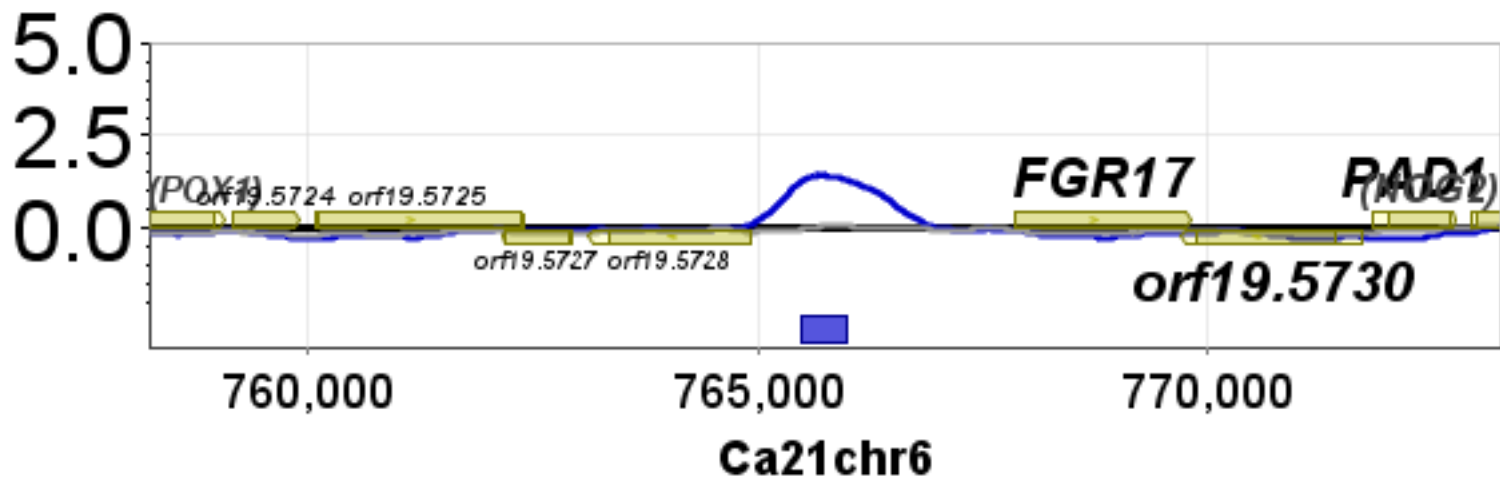



[1.415] Ca21chr1:2991836-3006835 [+] [ntar\_268, CUP2, CYB2, orf19.5003, RAD54]

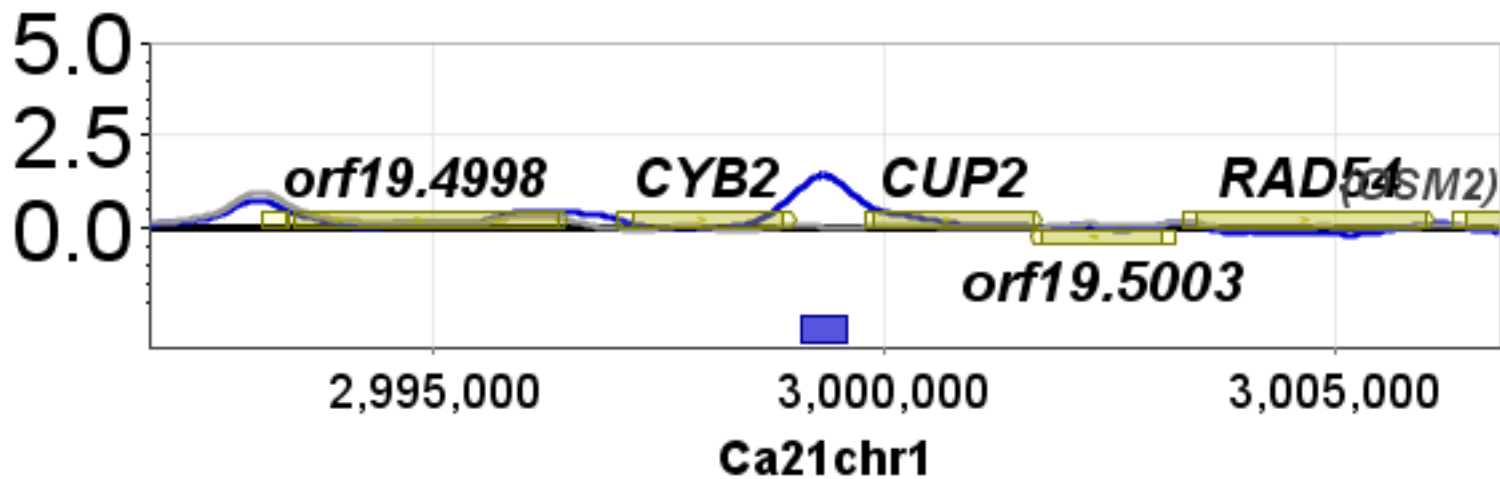

[1.413] Ca21chr3:1117358-1132357 [+] [ntar\_618, ntar\_617, RHB1, ntar\_616, ntar\_615]

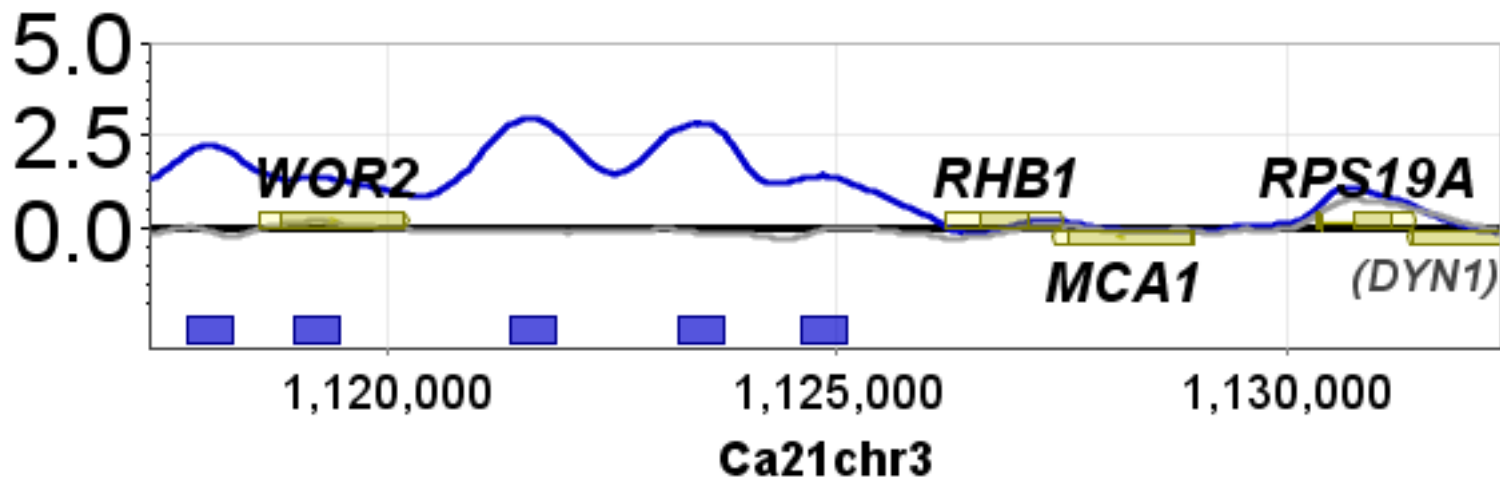

[1.397] Ca21chr3:1111725-1126724 [+] [WOR2, ntar\_614, ntar\_615, ntar\_616, ntar\_617]

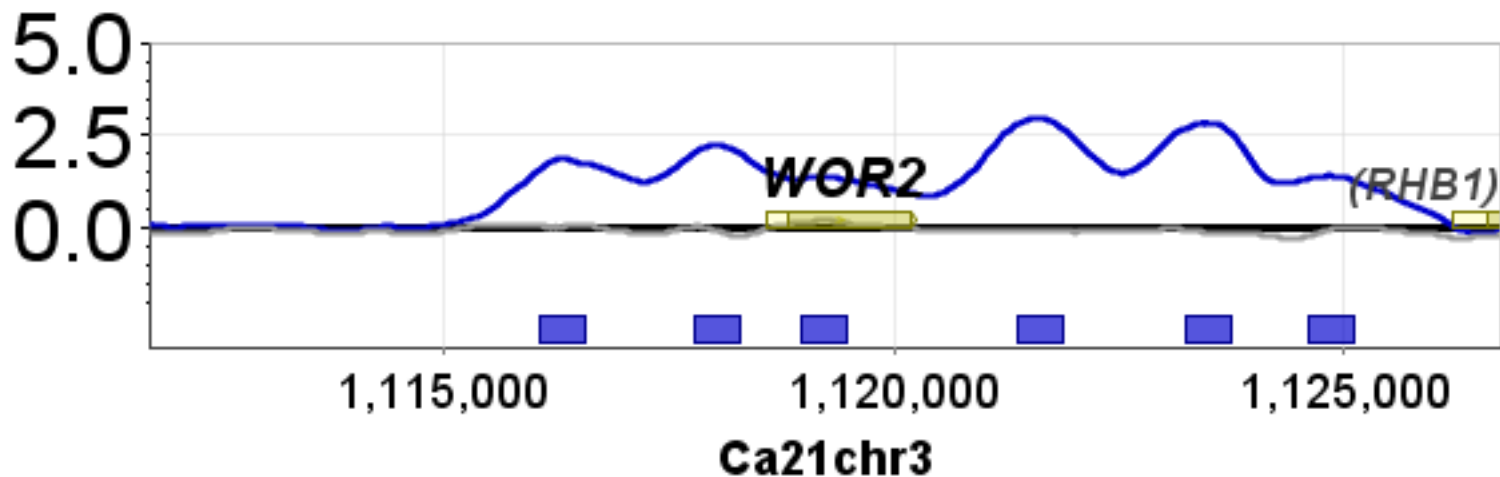

[1.376] Ca21chr6:82670-97669 [+] [ntar\_970, FET3, orf19.4210, FET99, orf19.4209]

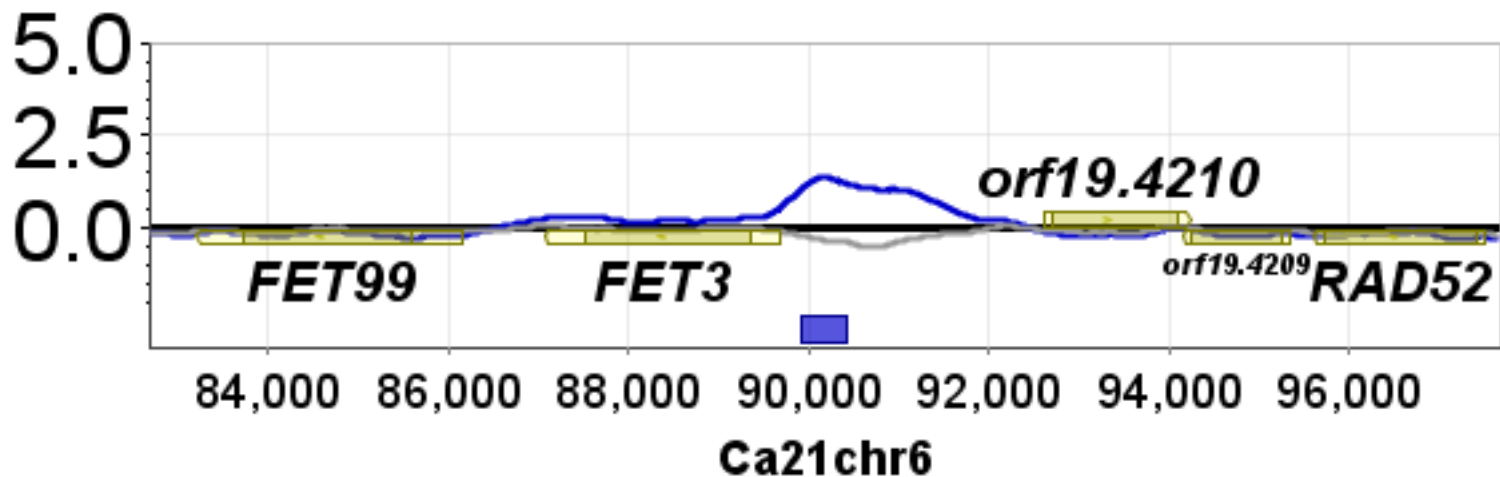

[1.365] Ca21chr1:2931895-2946894 [+] [orf19.4972, HYR1, orf19.4970]

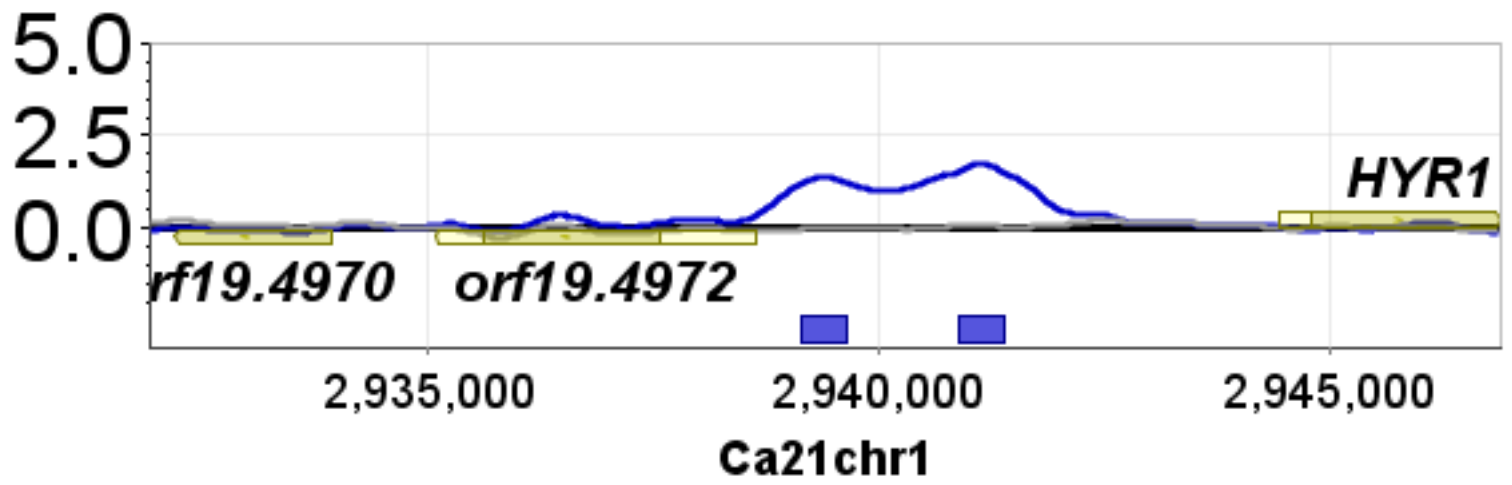

[1.345] Ca21chr2:1864777-1879776 [+] [ntar\_471, ntar\_470, IFF6, MET10, ntar\_469]

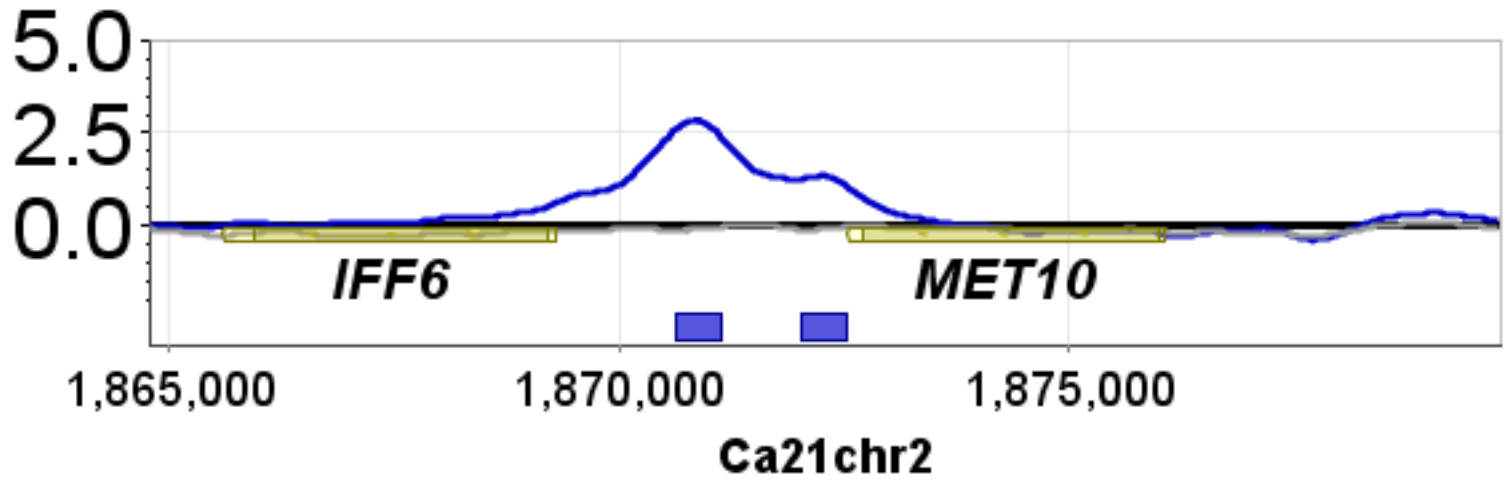

[1.336] Ca21chr4:562838-577837 [+] [orf19.2724, orf19.2725, ntar\_770, HIT1]

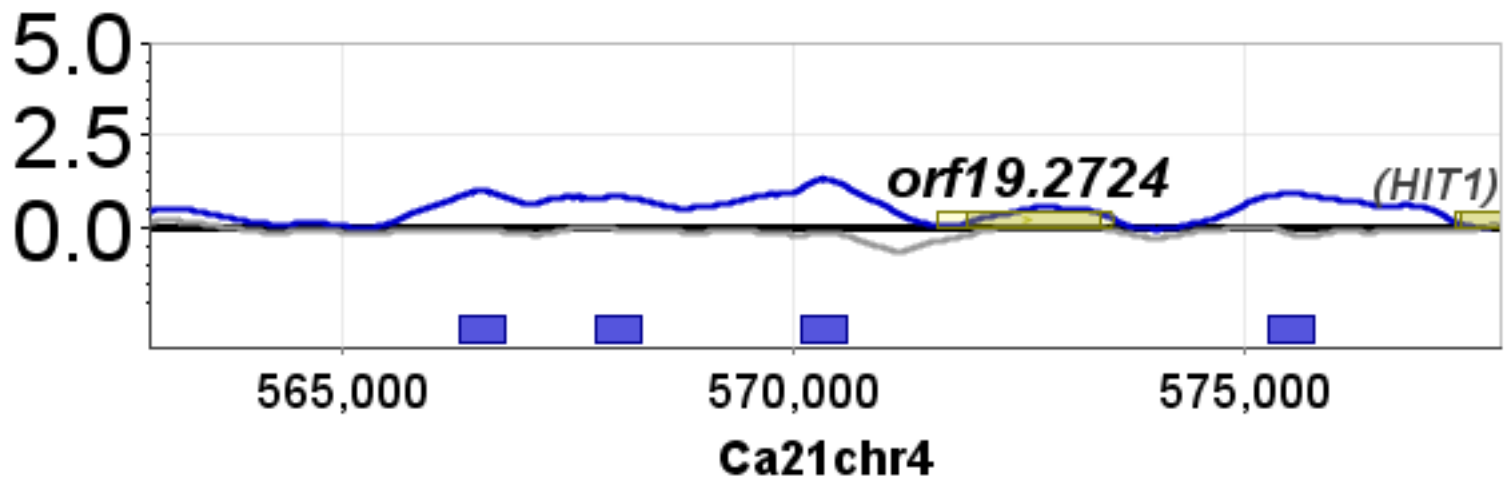

[1.332] Ca21chr1:1322369-1337368 [+] [ntar\_127, orf19.1821]

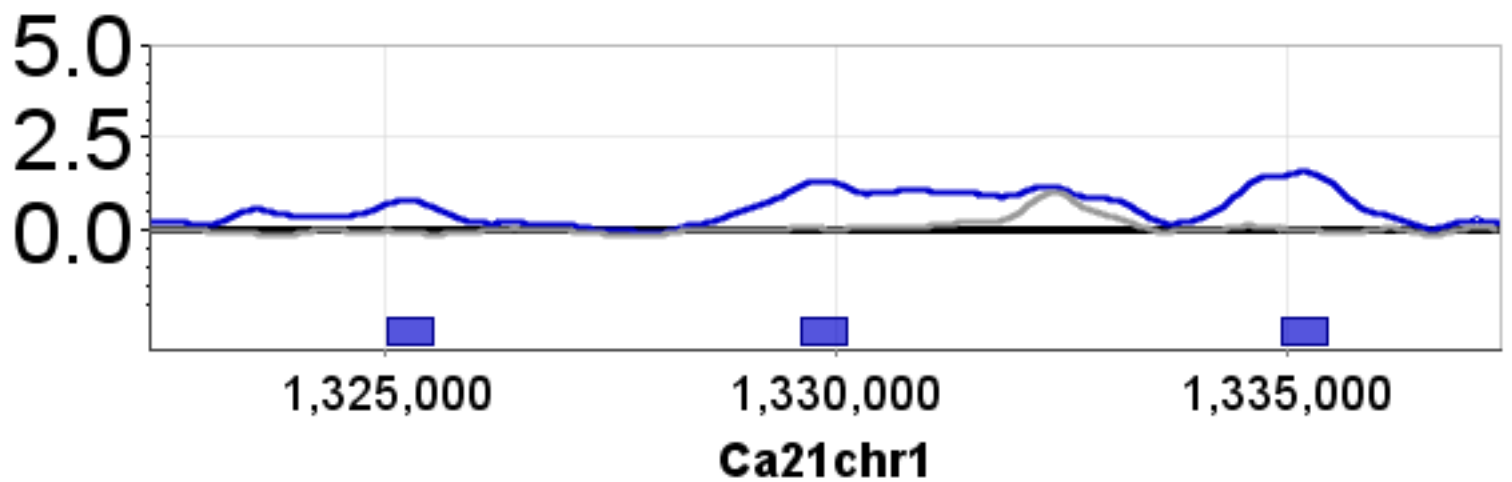

[1.326] Ca21chr2:1797789-1812788 [+] [BUD20, PIR1, orf19.217, orf19.216.1, orf19.223]

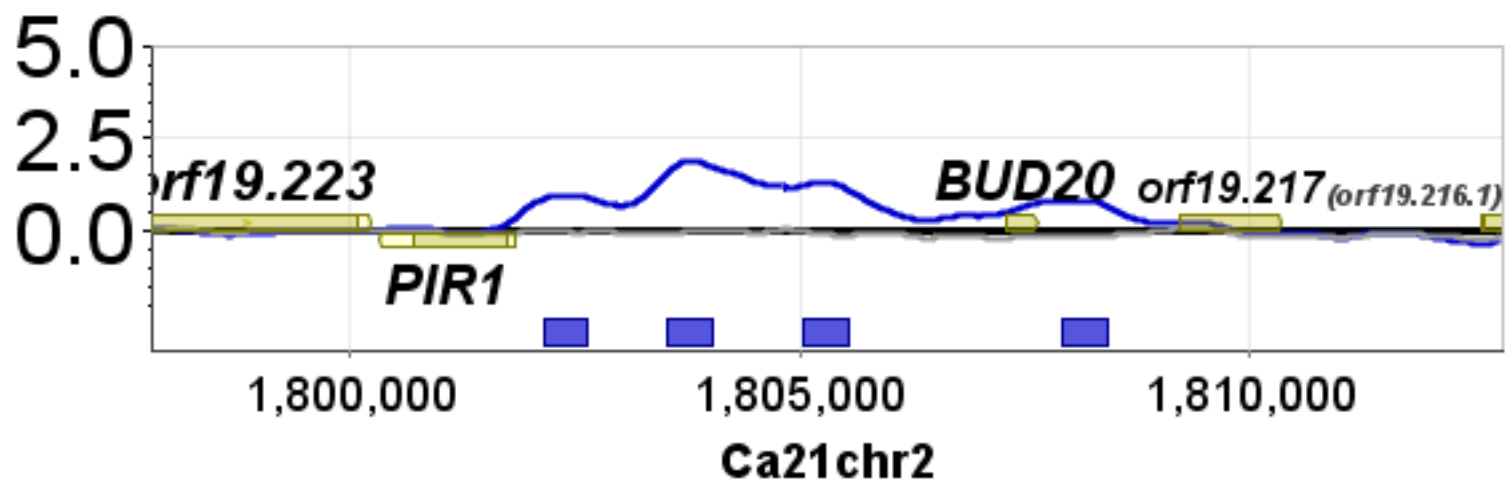

[1.312] Ca21chr3:1753539-1768538 [+] [orf19.6713, orf19.6712, orf19.6715, ntar\_688, UTP9]

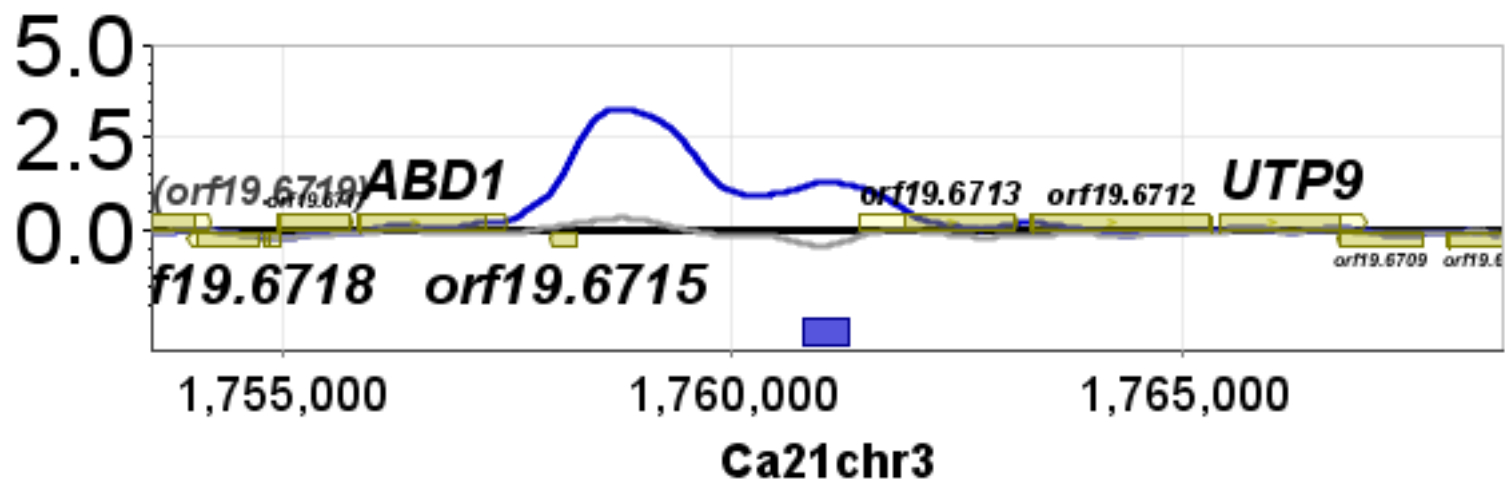

[1.308] Ca21chrR:2152885-2167884 [+] [CHT3, INO1, orf19.7588, orf19.7589, ntar\_1404]

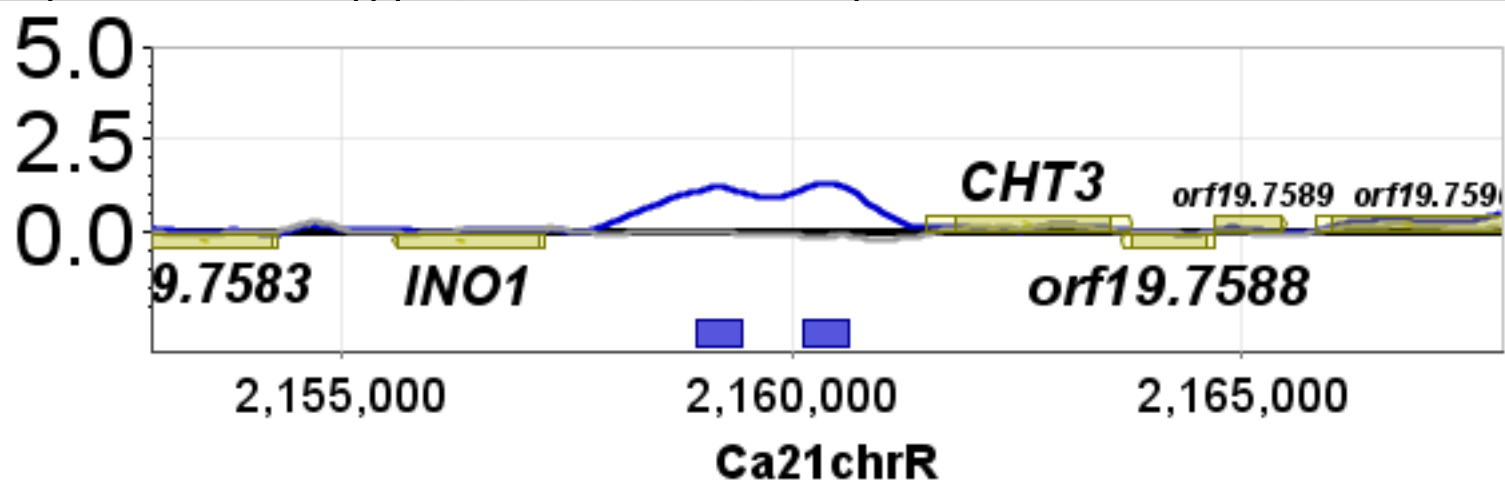

[1.304] Ca21chr1:2046752-2061751 [+] [orf19.4793, ntar\_195, orf19.4792, orf19.4791, orf19.4795]

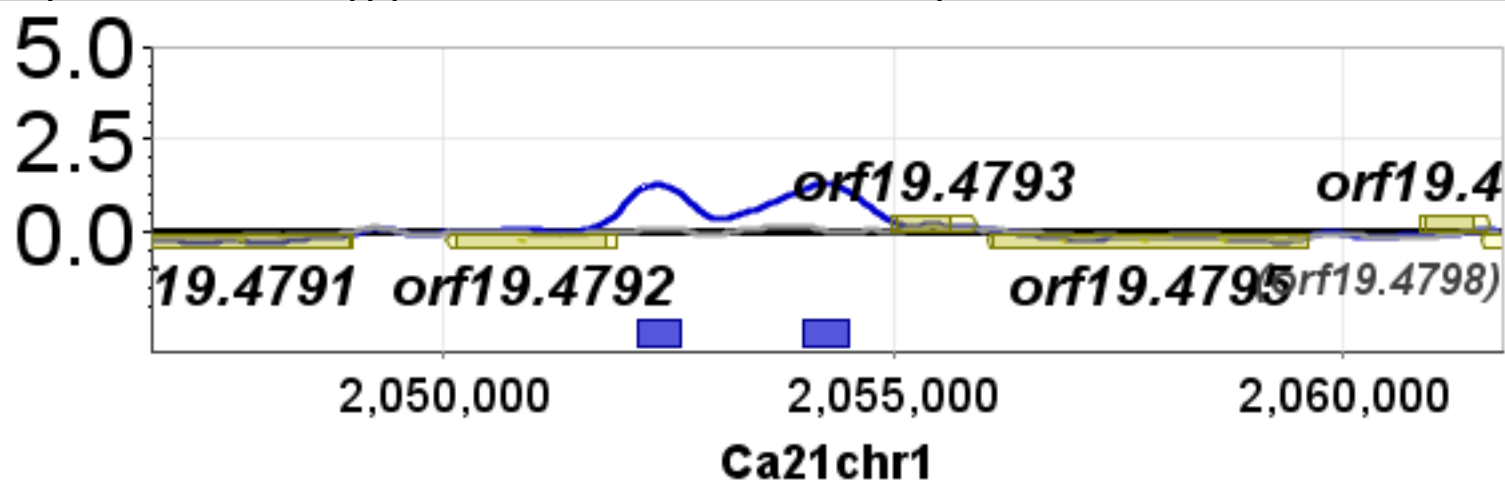

[1.297] Ca21chr7:916229-931228 [+] [orf19.7149, ntar\_1154, TPO2, NRG1, ntar\_1155]

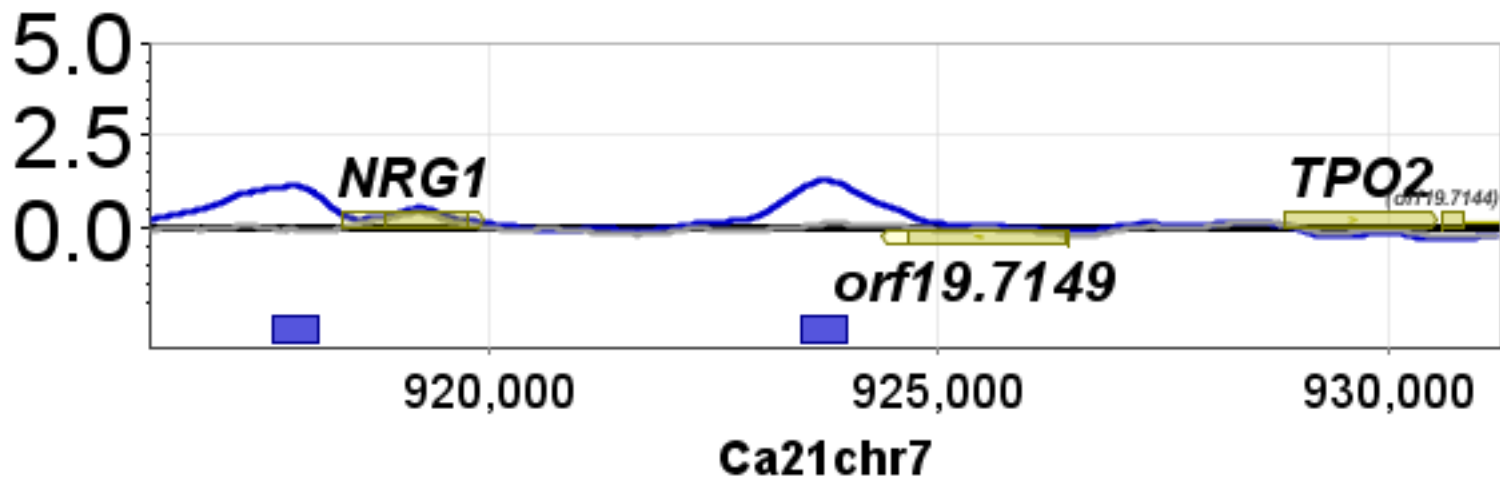

[1.28] Ca21chr5:295383-310382 [+] [CFL4, orf19.1933, orf19.1934, CFL5, orf19.1935]

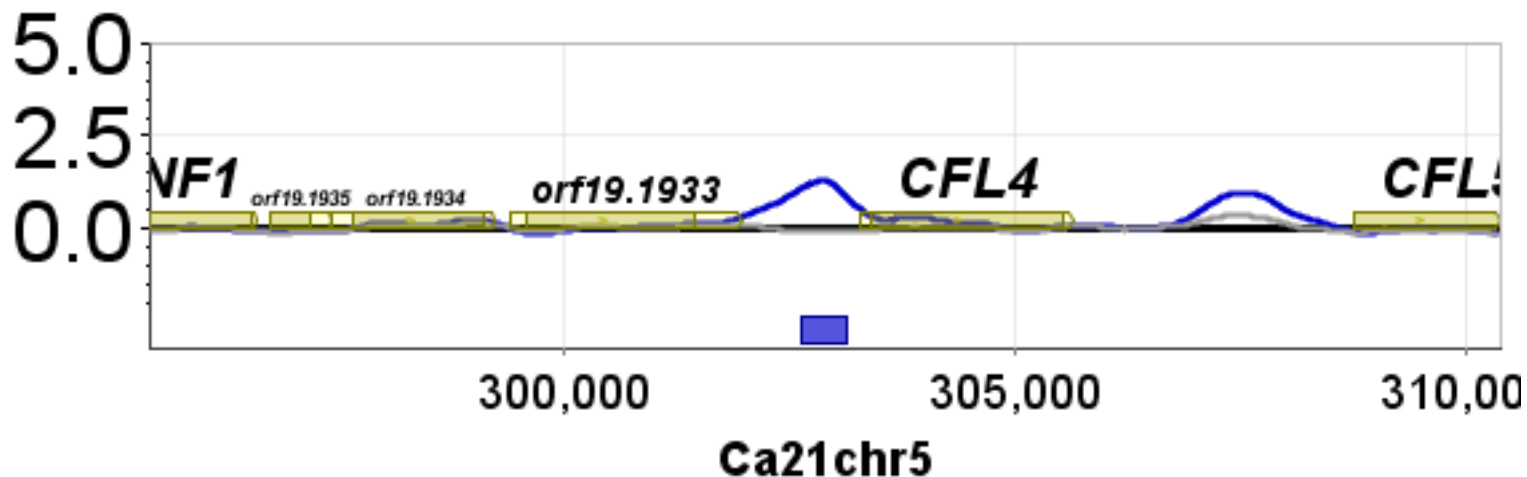

[1.277] Ca21chr1:2044901-2059900 [+] [orf19.4792, ntar\_195, orf19.4793, orf19.4791, orf19.4789]

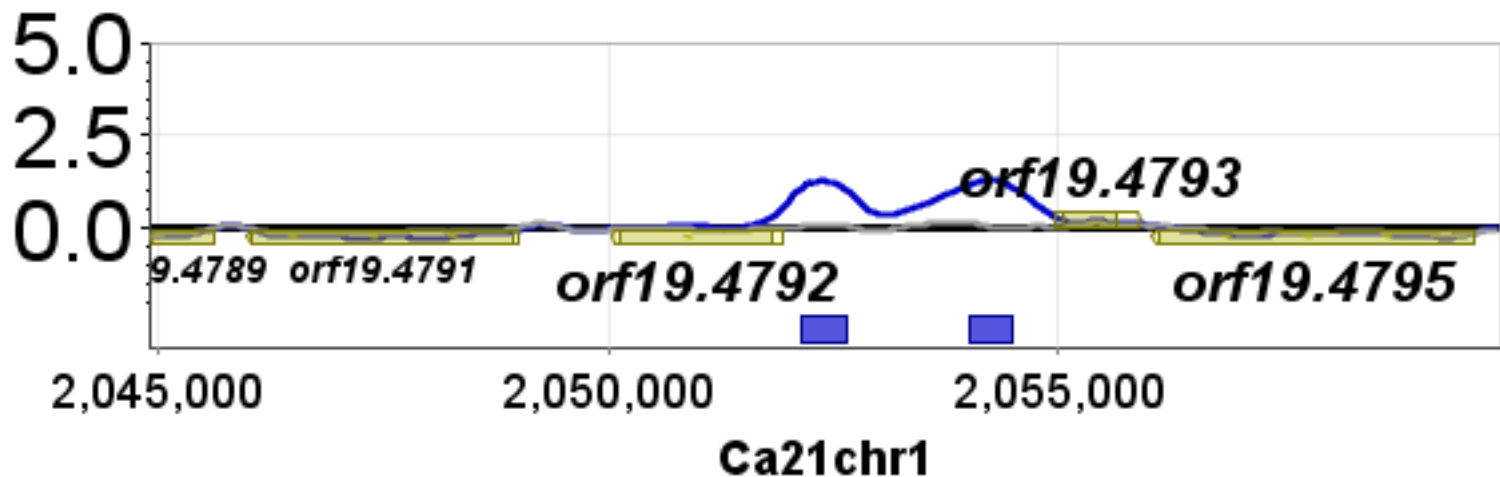

[1.249] Ca21chr3:566425-581424 [+] [orf19.255, orf19.257, orf19.258, orf19.259, orf19.254]

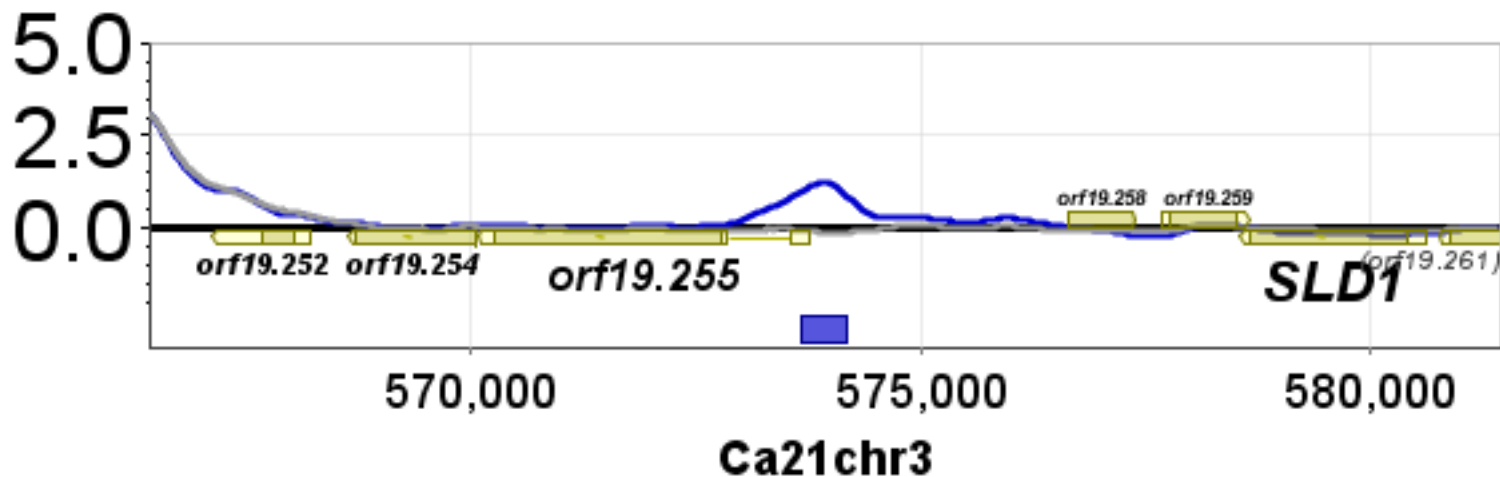

[1.248] Ca21chr1:142010-157009 [+] [orf19.6027, ntar\_16, ERG2, orf19.6025, orf19.6024]

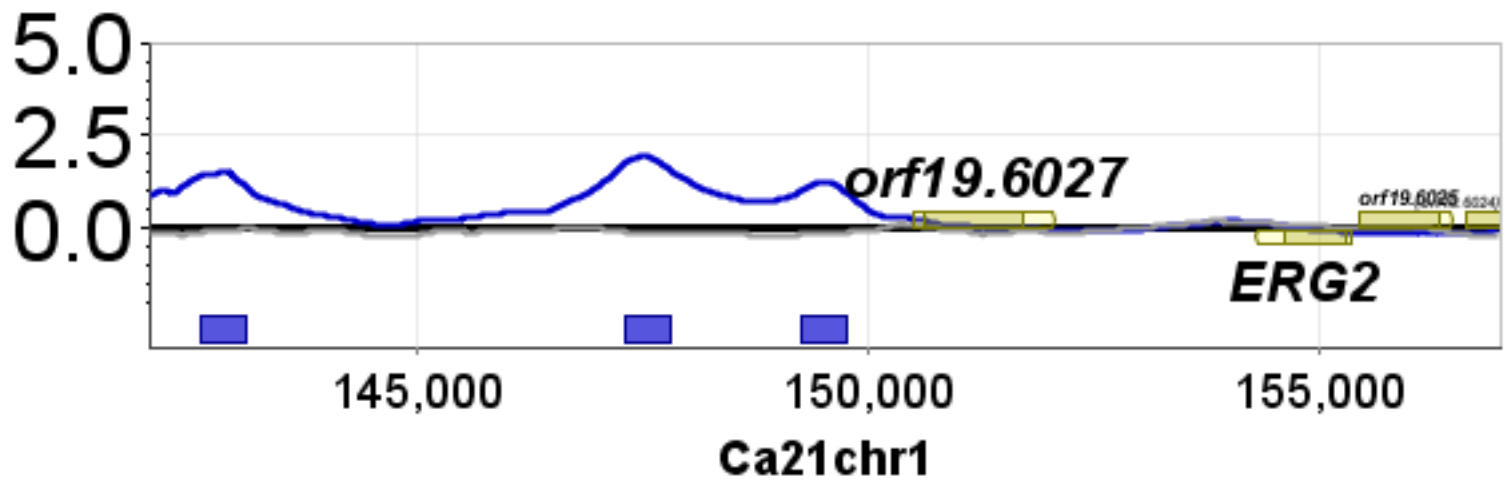

[1.242] Ca21chr3:1585304-1600303 [+] [orf19.6805, tv(qua)3, ntar\_667, orf19.6804, HUT1]

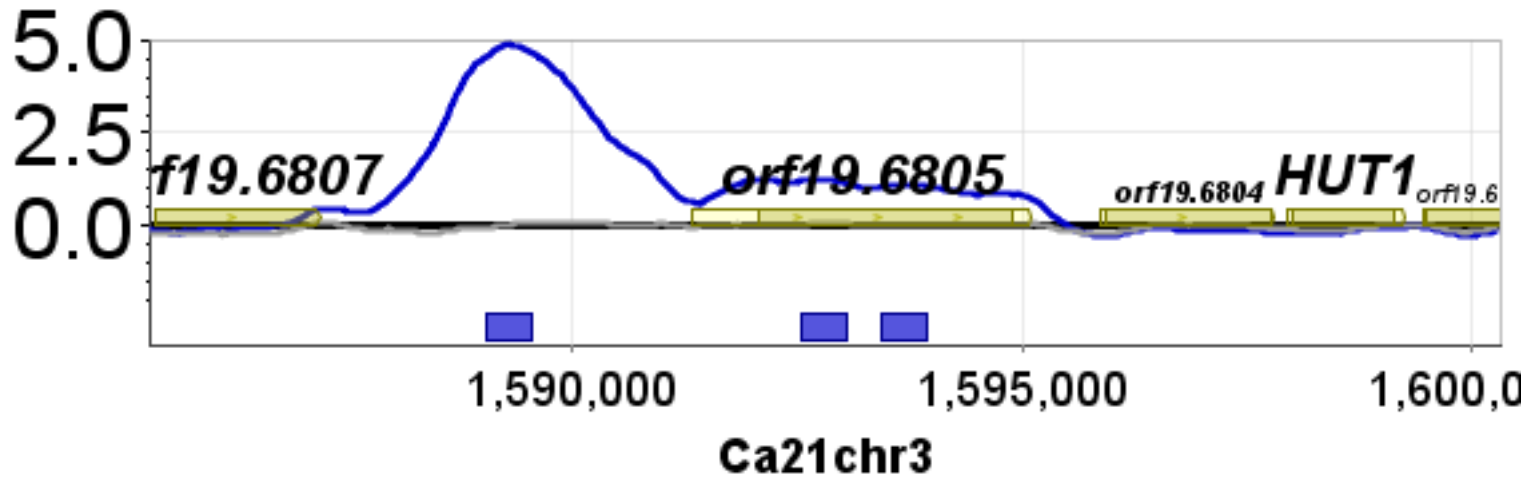

[1.228] Ca21chr5:492838-507837 [+] [ntar\_890, PTH2, PTH1, THR4, orf19.4234]

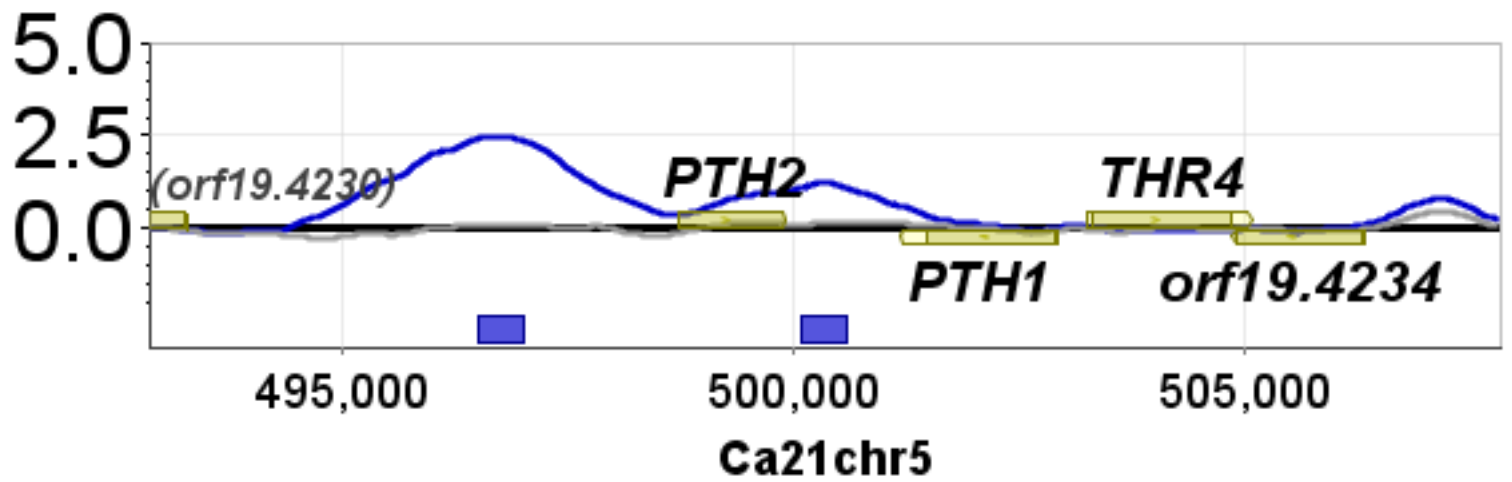

[1.217] Ca21chrR:2151703-2166702 [+] [INO1, CHT3, ntar\_1403, orf19.7583, orf19.7588]

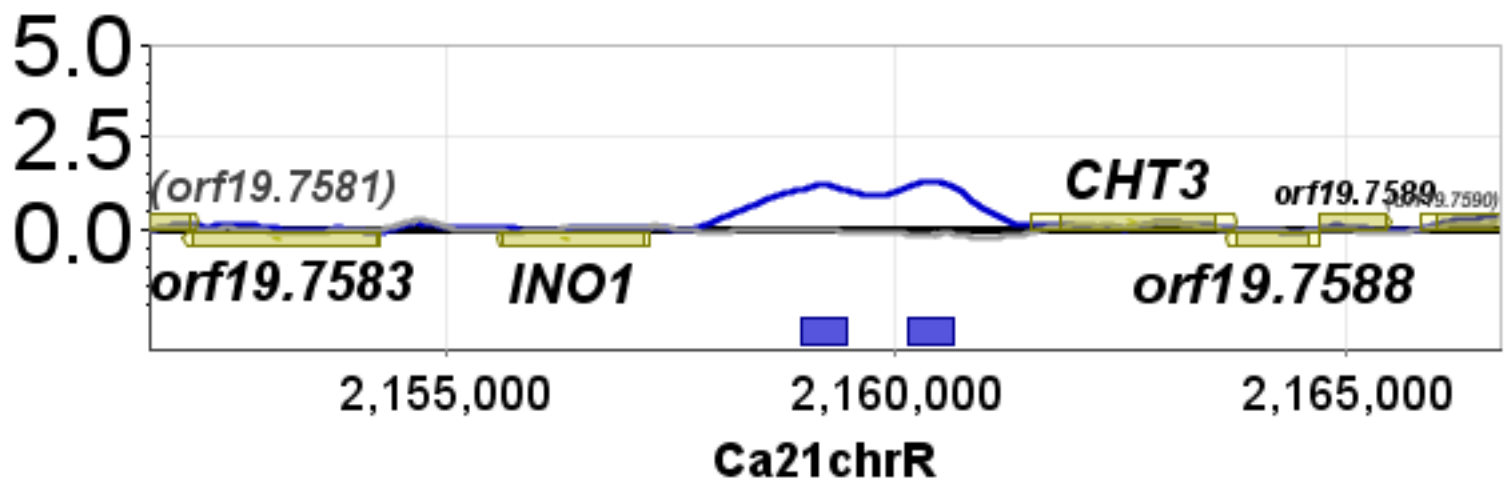

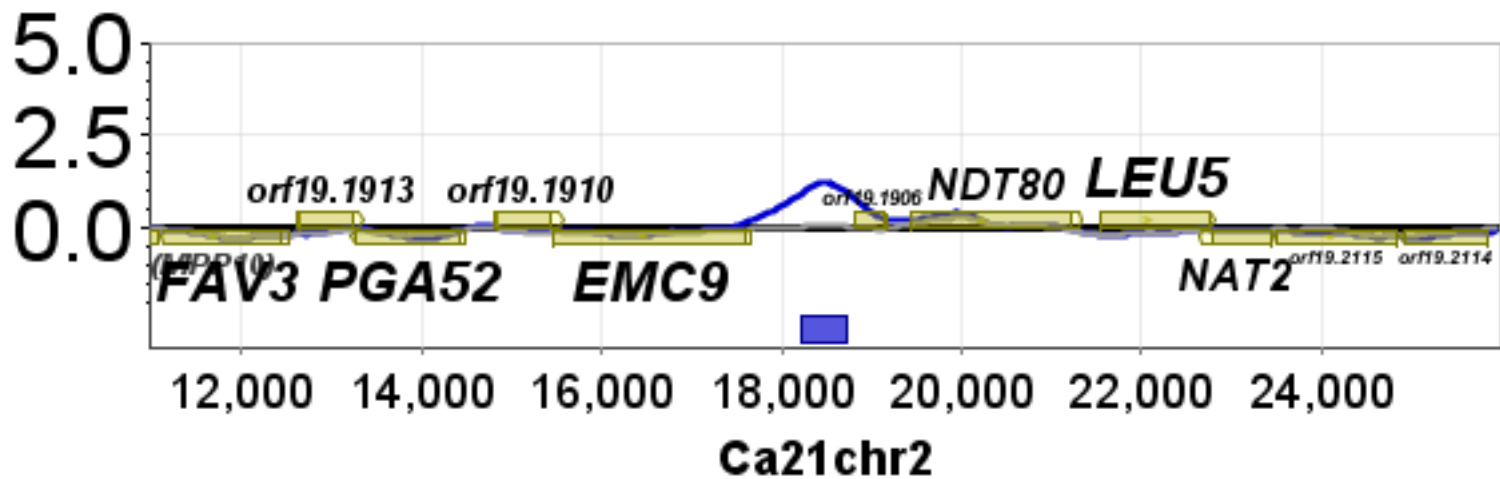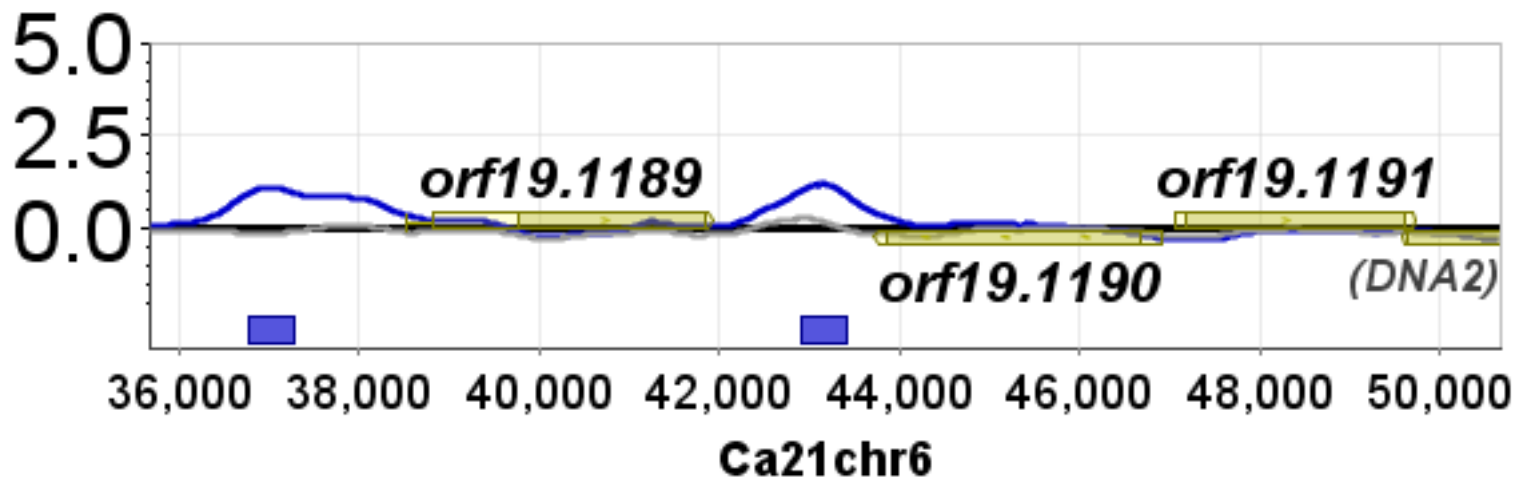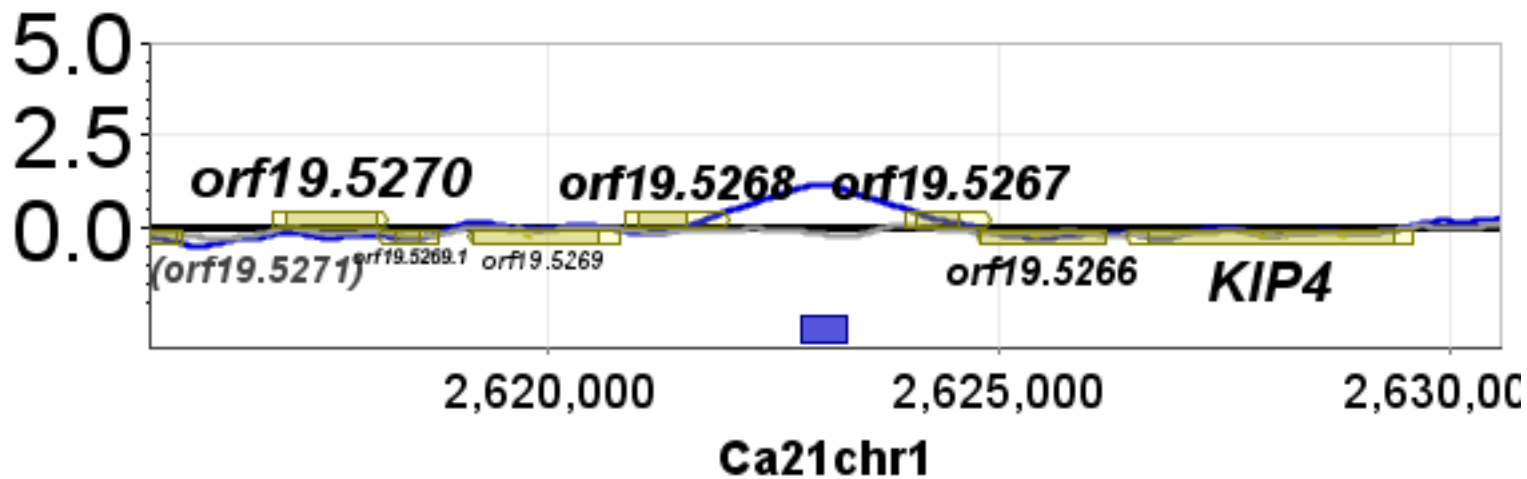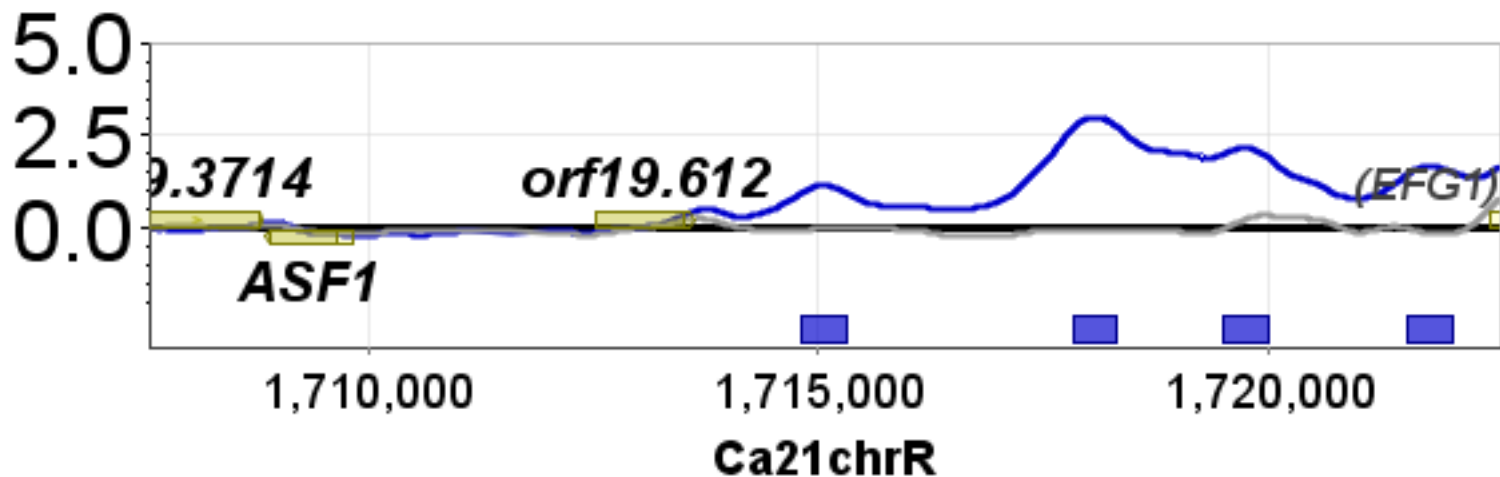

[1.139] Ca21chr5:249525-264524 [+] [ntar\_867, ntar\_866, orf19.1958, orf19.1959, CYC3]

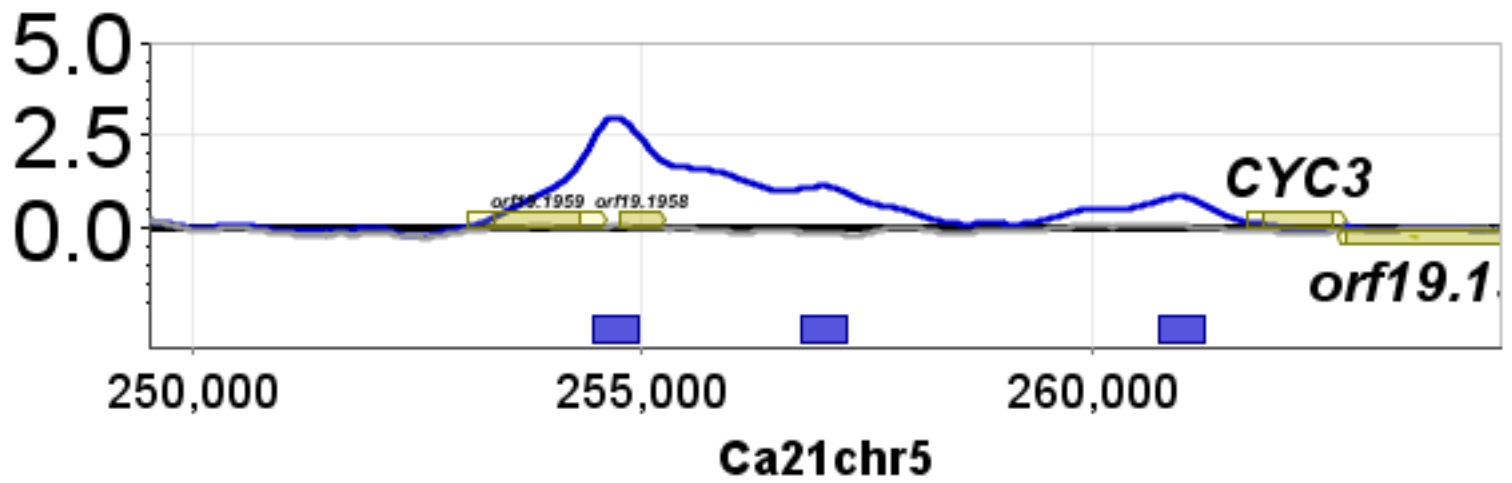

[1.139] Ca21chr5:1108480-1123479 [+] [orf19.4000, orf19.4001, orf19.3999, orf19.3998, ADH1]

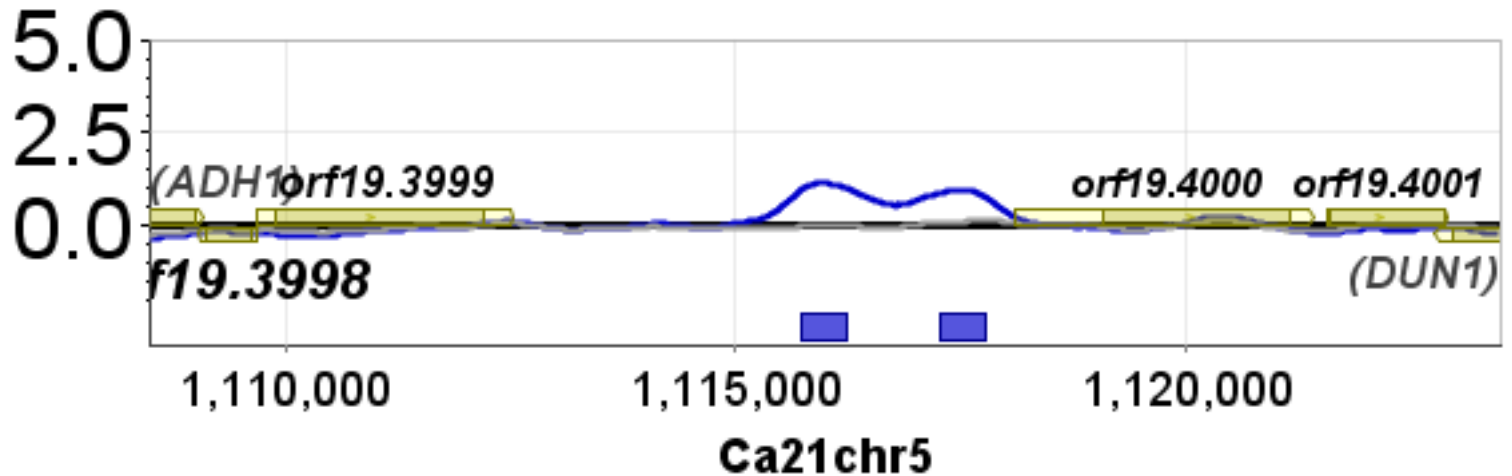

[1.134] Ca21chr7:910351-925350 [+] [NRG1, ntar\_1153, orf19.7151, ntar\_1152, ntar\_1151]

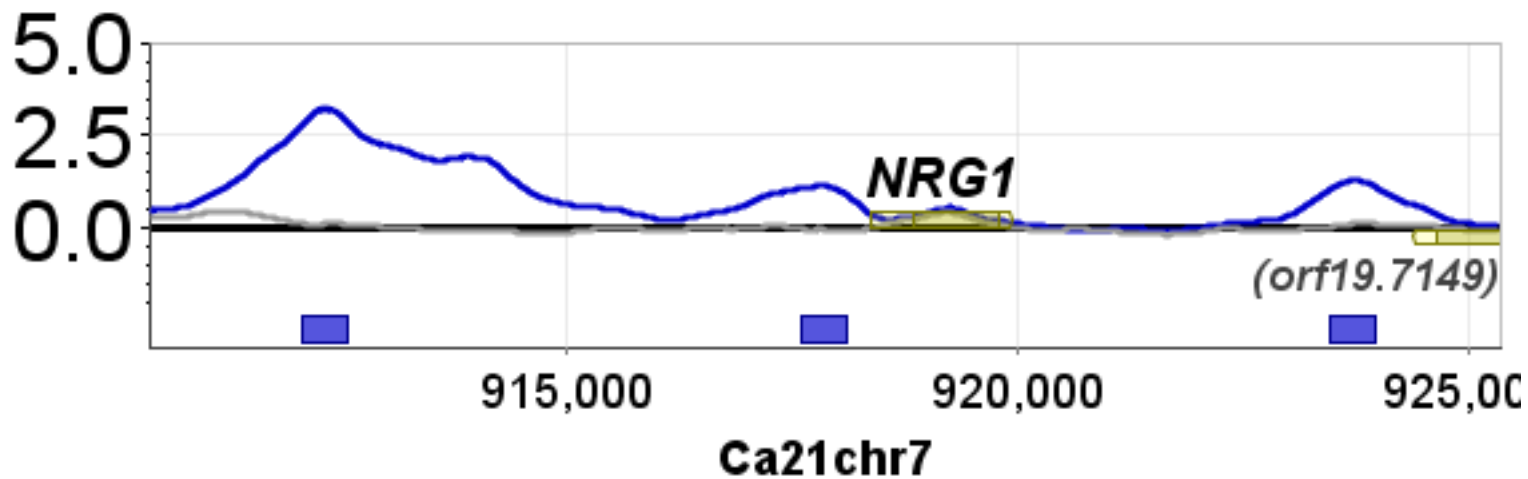

[1.113] Ca21chr4:868595-883594 [+] [PGA31, orf19.5300, ECM1, ntar\_792, PGA30]

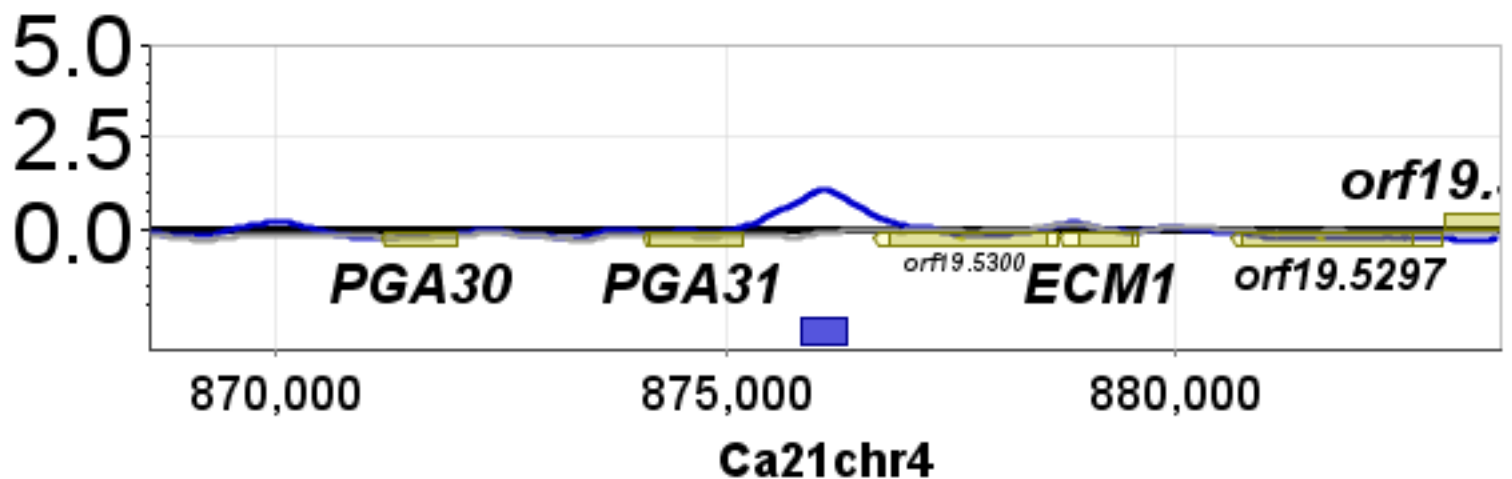

[1.105] Ca21chr6:29534-44533 [+] [ntar\_969, orf19.1189, CPH2, ntar\_968, orf19.1186]

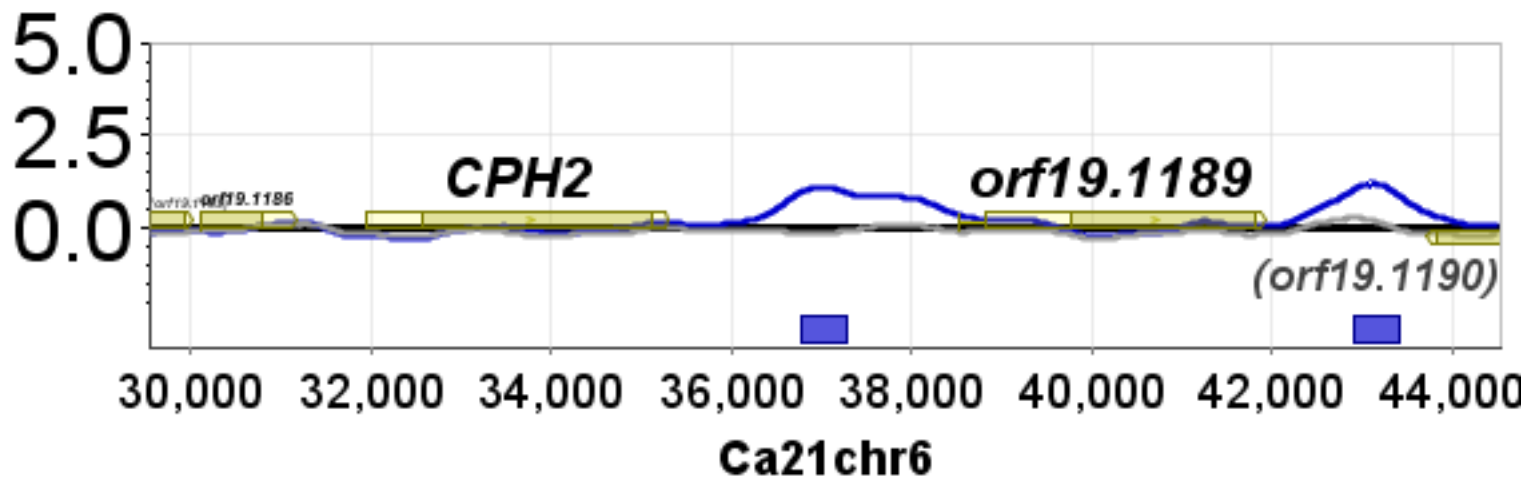

[1.102] Ca21chr6:353906-368905 [+] [PTK2, ntar\_996, SUR7, RPL32, FGR37]

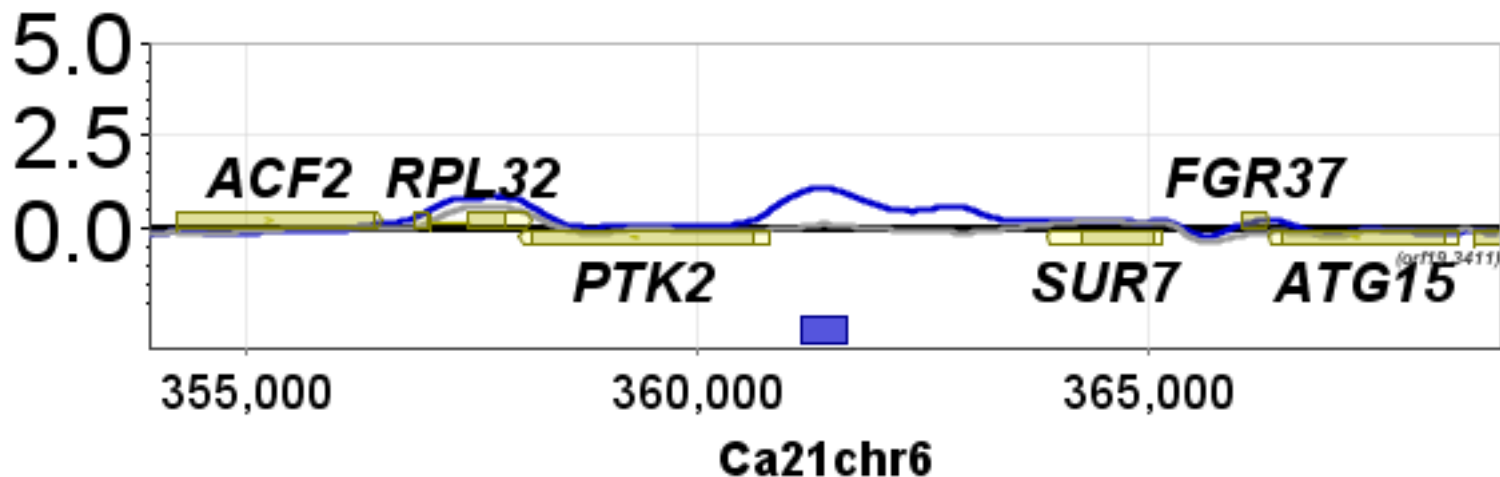

[1.095] Ca21chr3:1465501-1480500 [+] [th(gug)3, ntar\_658, ntar\_659, AAF1, GLG2]

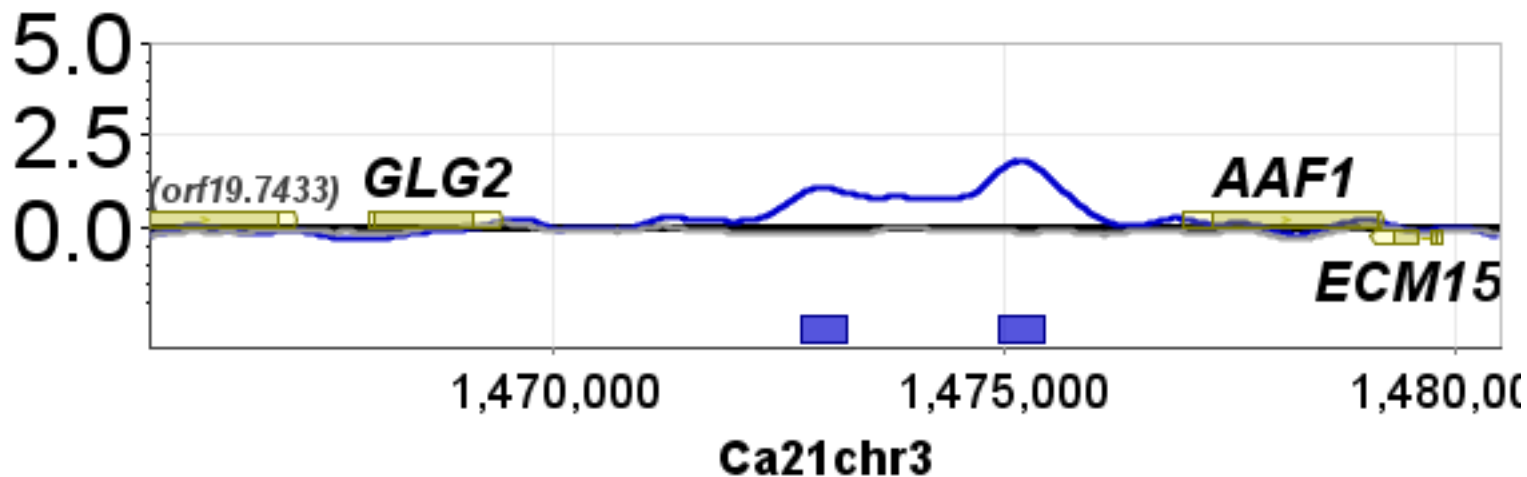

[1.093] Ca21chr3:1586203-1601202 [+] [ty(gua)3, orf19.6804, orf19.6805, ntar\_667, HUT1]

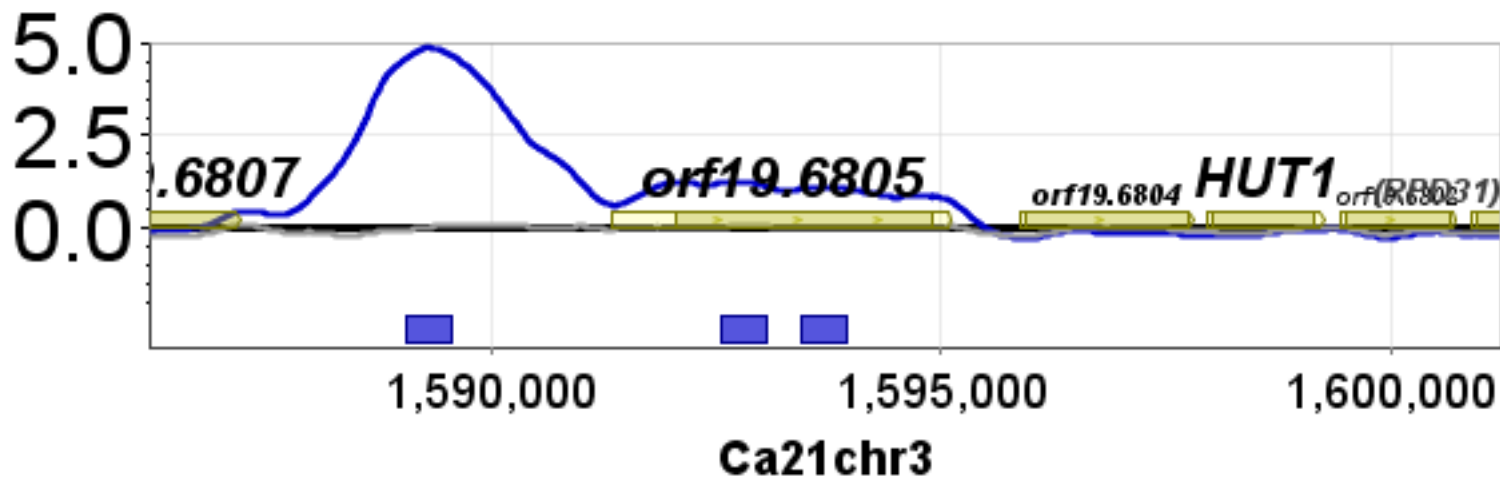



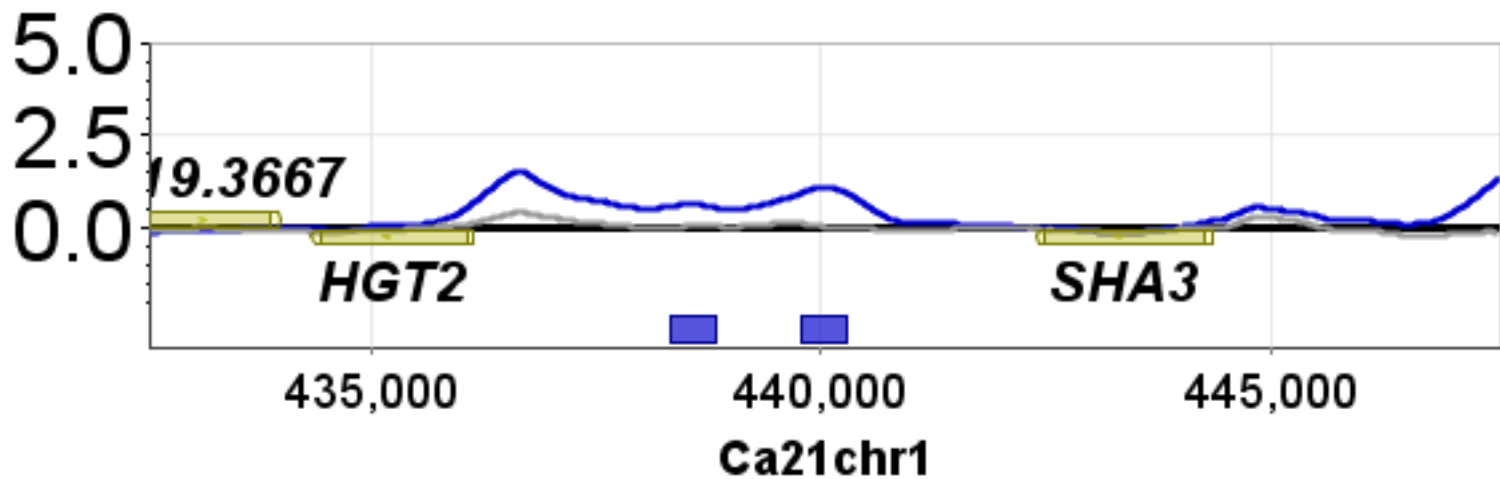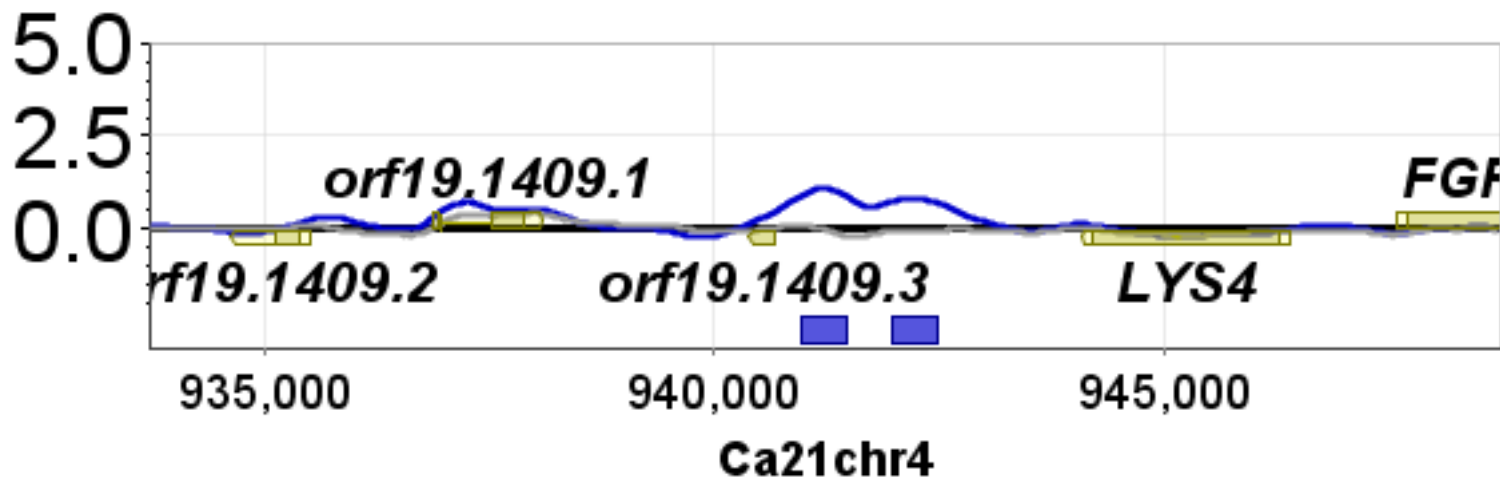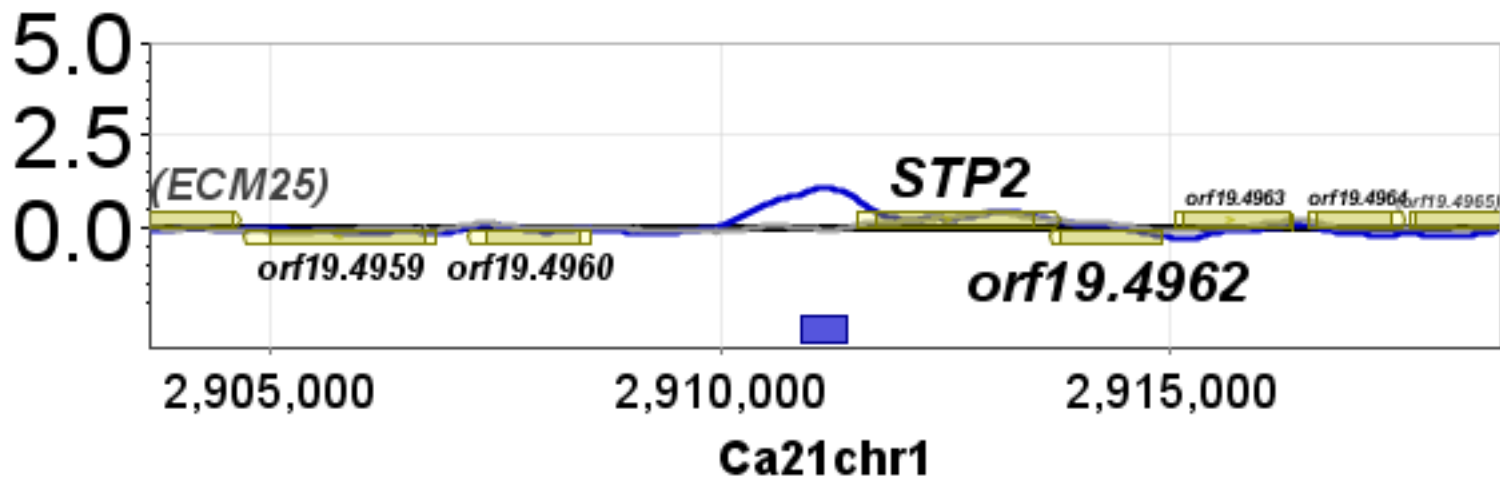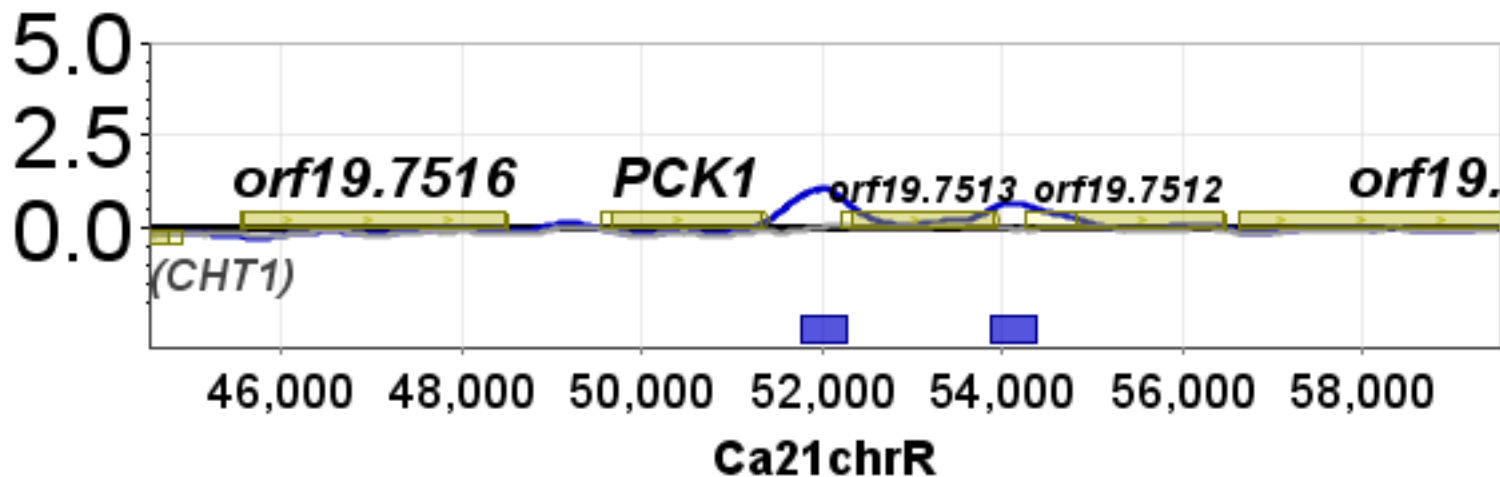

[1.056] Ca21chrR:772477-787476 [+] [orf19.4394, CIT1, orf19.4395, orf19.4396, ntar\_1246]

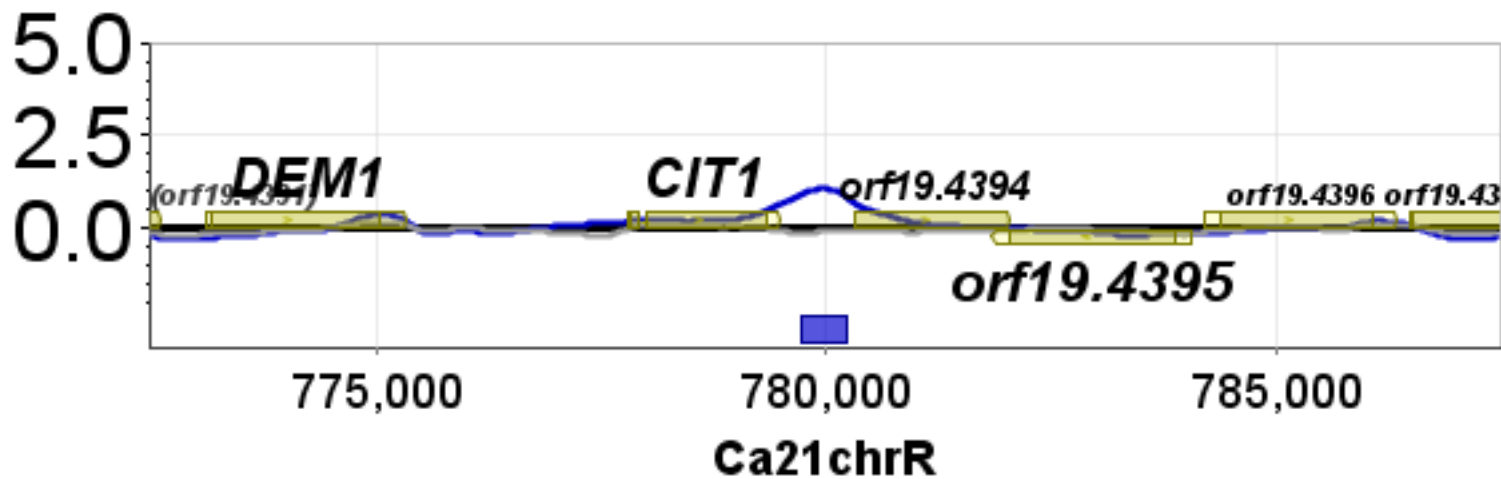

[1.049] Ca21chr3:123719-138718 [+] [ntar\_534, ntar\_533, PMA1, ntar\_532, ntar\_531]

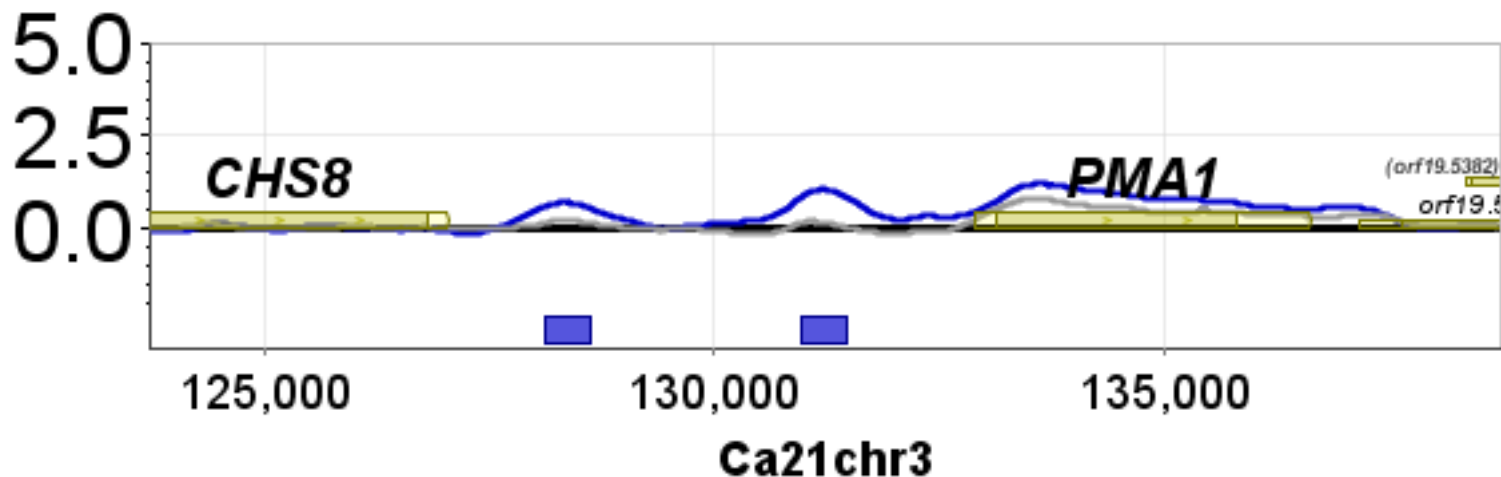

[1.046] Ca21chr5:105617-120616 [+] [AGA1, ntar\_854, orf19.936]

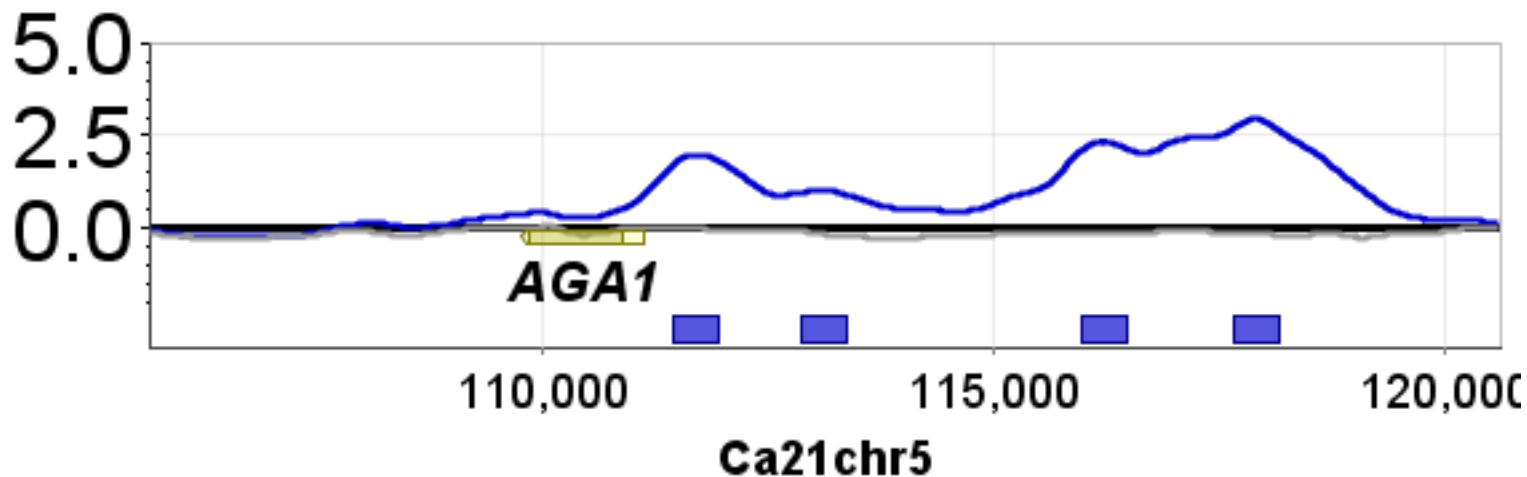

[1.034] Ca21chr1:1067949-1082948 [+] [orf19.4057, orf19.4059, ARO4, GAT2, orf19.4061]

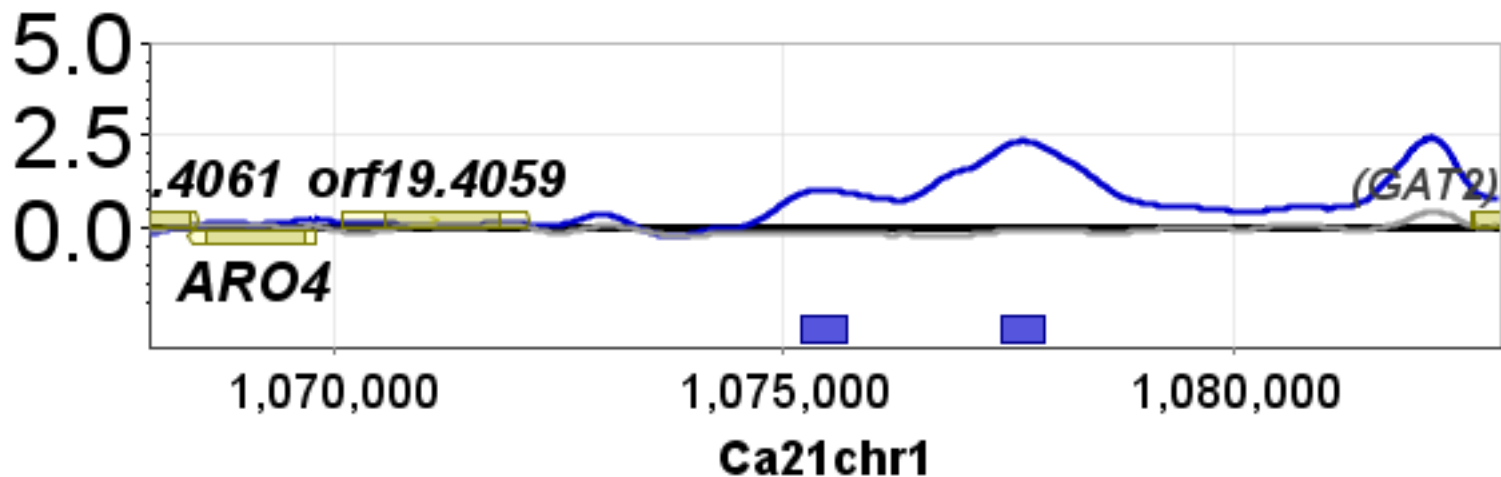

[1.034] Ca21chr3:239522-254521 [+] [ntar\_543, ntar\_544, orf19.3156, orf19.3158, UTP20]

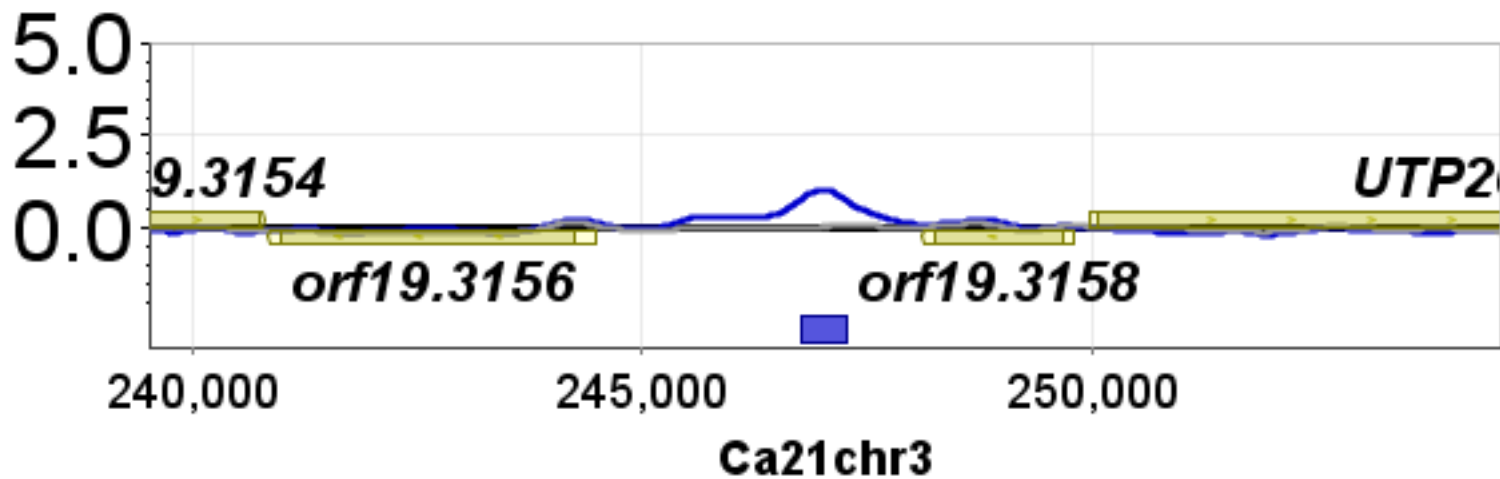

[1.028] Ca21chr2:1309282-1324281 [+] [RTA2, ntar\_400, orf19.25, RTA3, orf19.26]

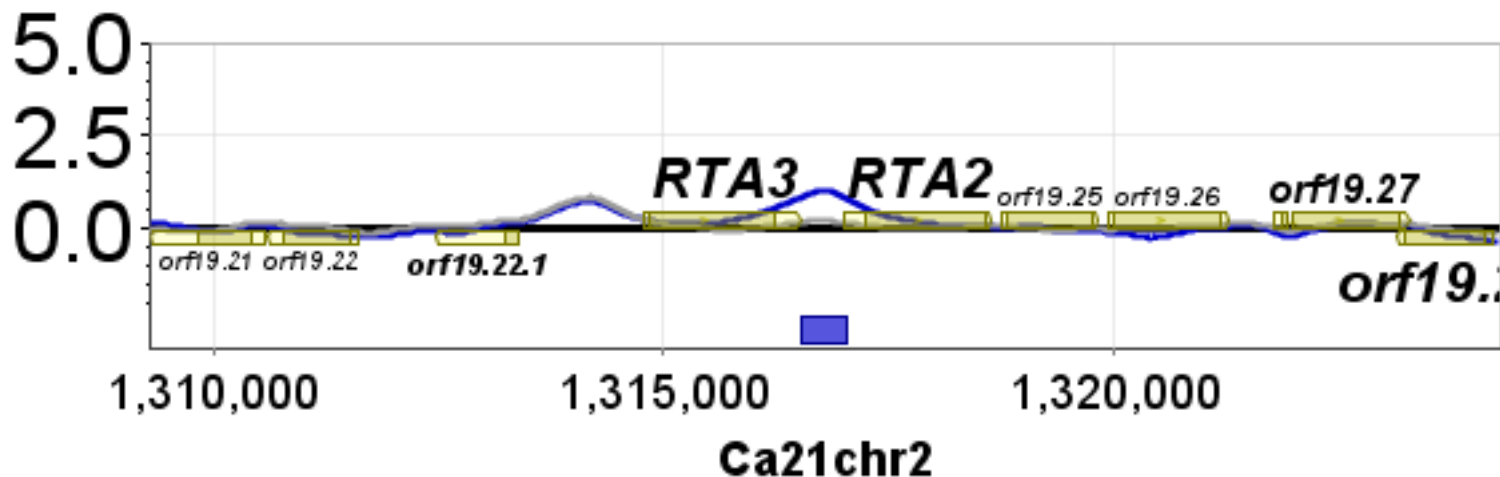

[1.027] Ca21chr1:490166-505165 [+] [orf19.3694, orf19.2925, orf19.2926, PGA5, MNN11]

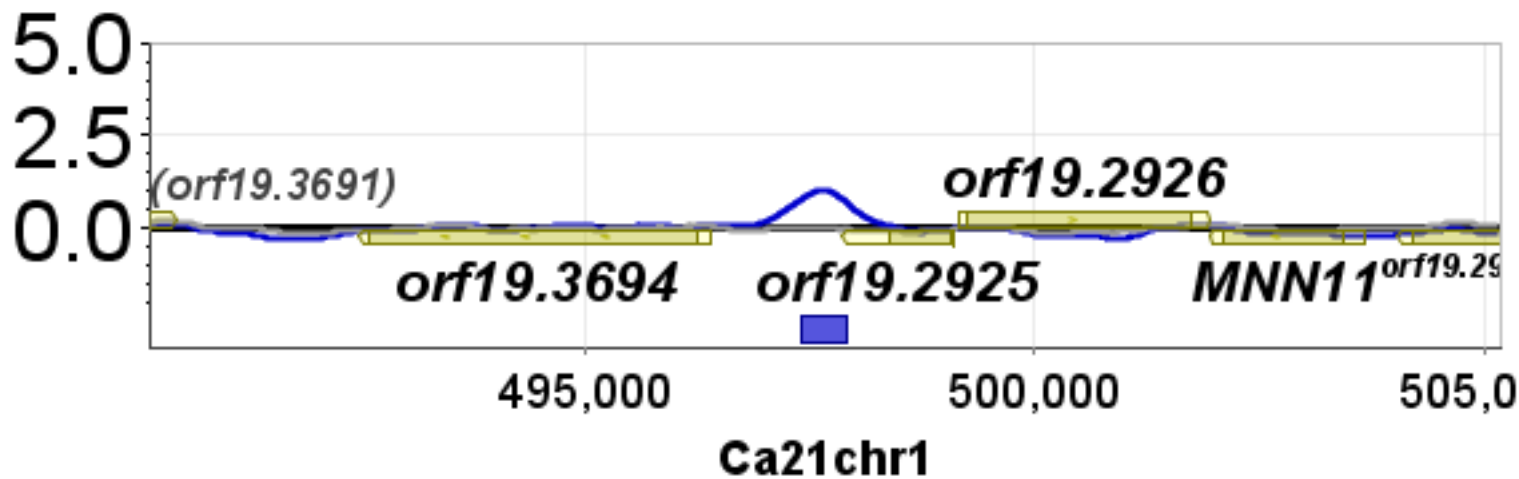

[1.025] Ca21chr2:446062-461061 [+] [OPI1, orf19.1544, ntar\_329, HEX3, orf19.1545]

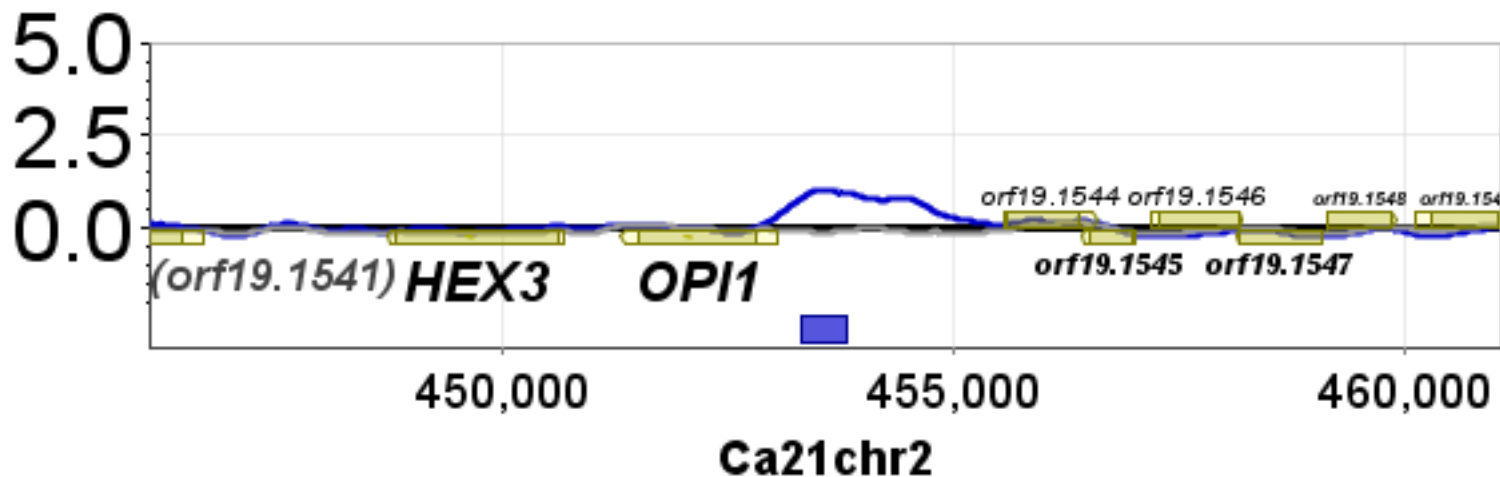

[1.024] Ca21chrR:623899-638898 [+] [PGA34, ntar\_1229, ntar\_1230, ntar\_1231, RPD3]

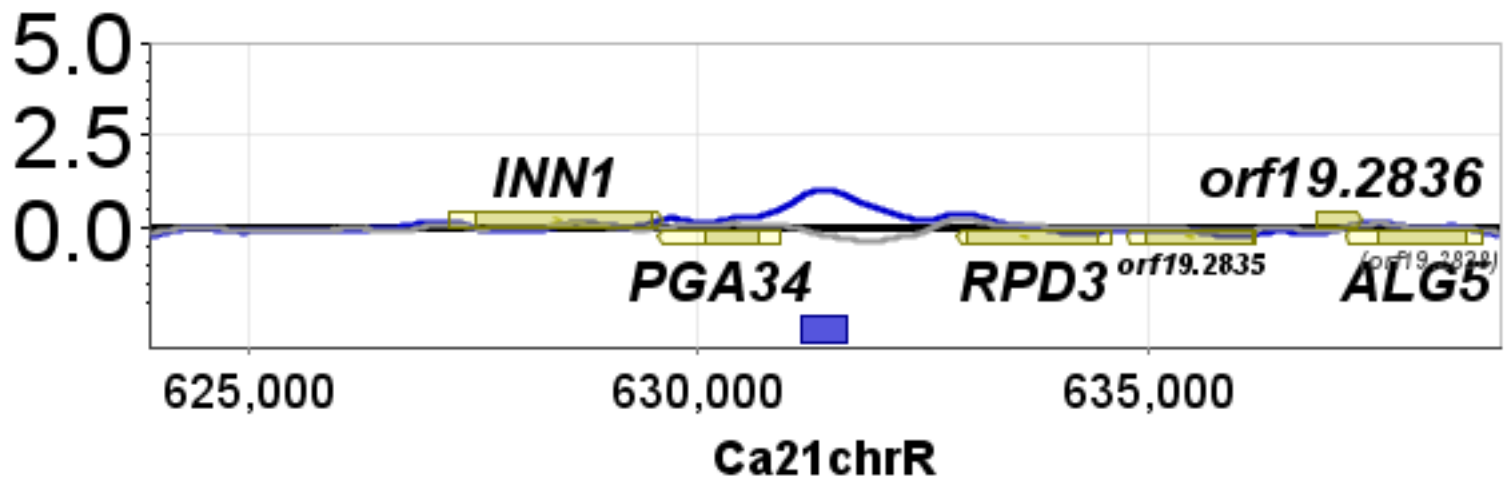

[1.009] Ca21chrR:1188854-1203853 [+] [orf19.5843, ntar\_1289, orf19.6653, DBP8, tc(qca)1]

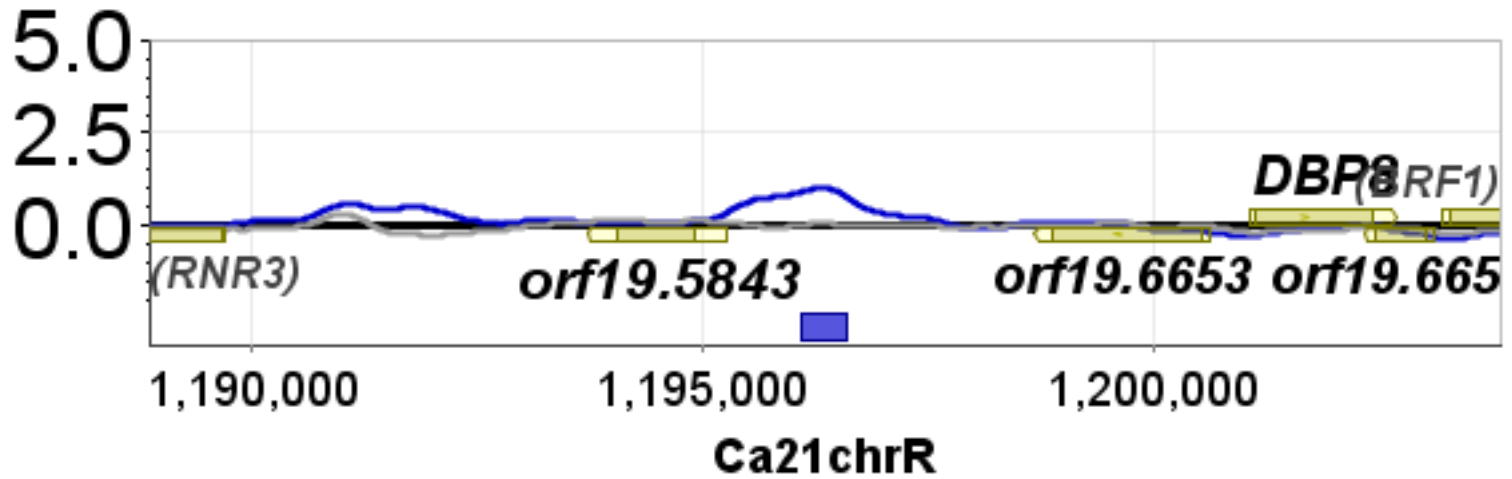

[1.001] Ca21chr5:845250-860249 [+] [orf19.1106, orf19.1105.3, PGA56, ntar\_930, orf19.1107]

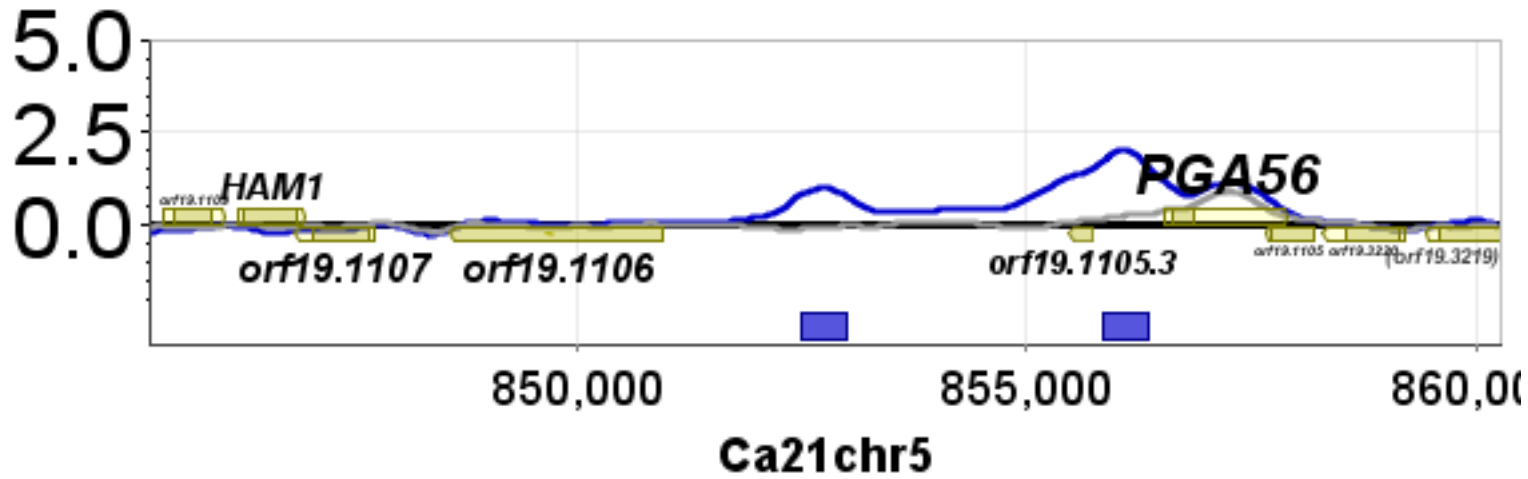

[0.996] Ca21chr4:559035-574034 [+] [orf19.2725, orf19.2724, orf19.2726, ntar\_769]

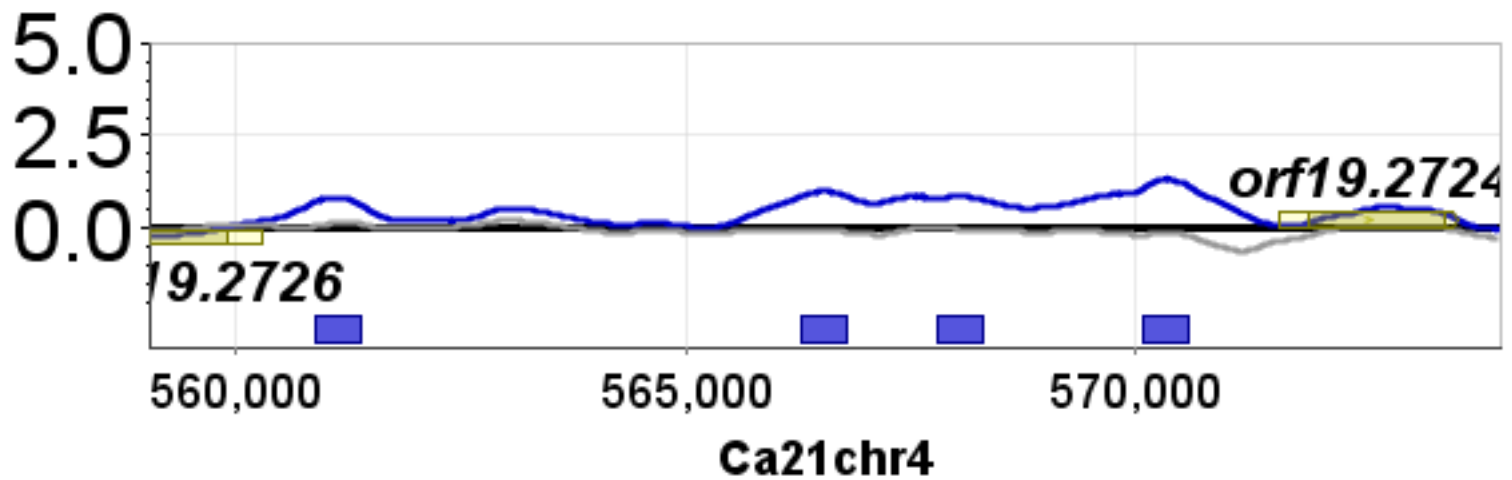

[0.992] Ca21chr1:2093754-2108753 [+] [ntar\_197, orf19.4818, orf19.4819, ntar\_198, RAM2]

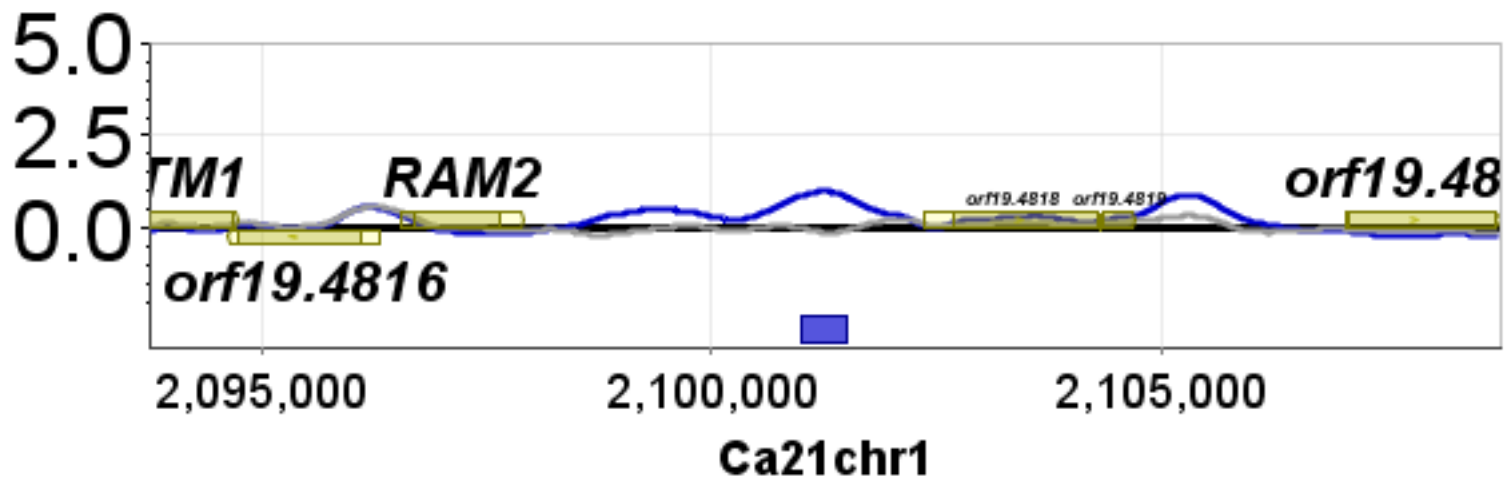

[0.986] Ca21chr1:2224016-2239015 [+] [WOR1, MIR1]

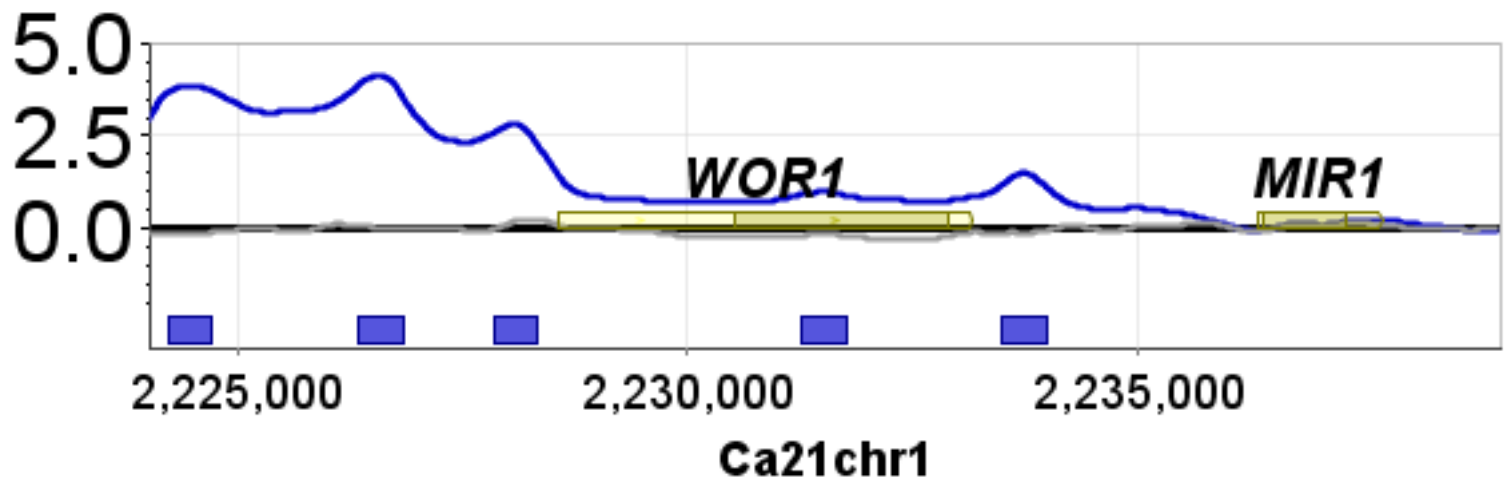

[0.981] Ca21chrR:871519-886518 [+] [orf19.467, ntar\_1253, ntar\_1254, ntar\_1255, HST7]

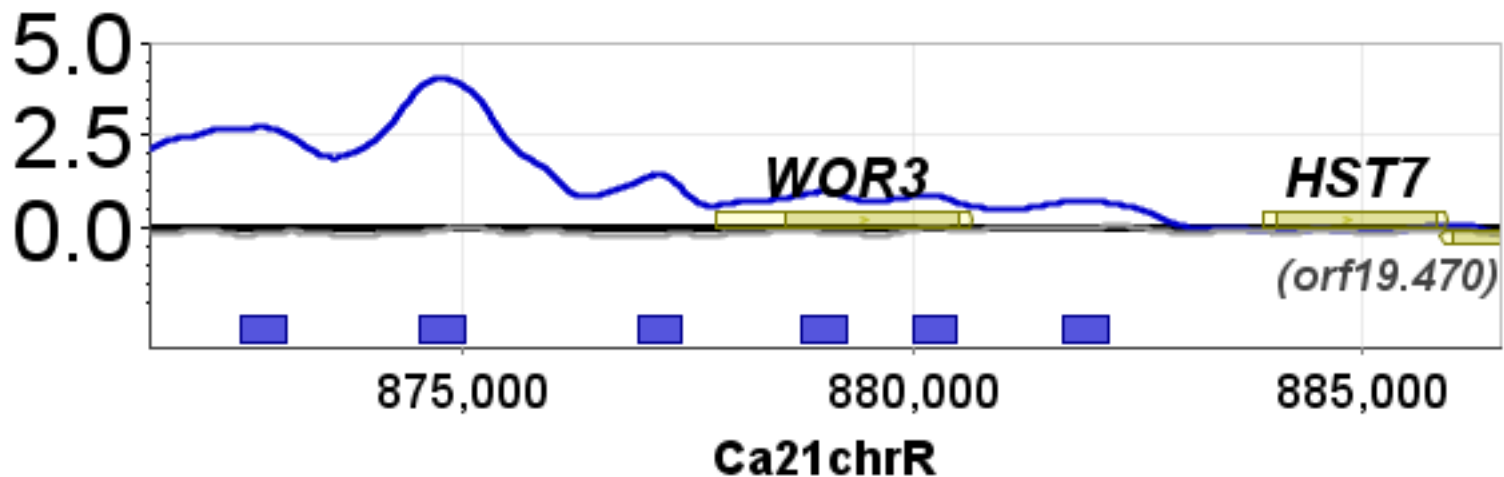

[0.976] Ca21chr5:1110028-1125027 [+] [orf19.4000, orf19.4001, DUN1, orf19.3999]

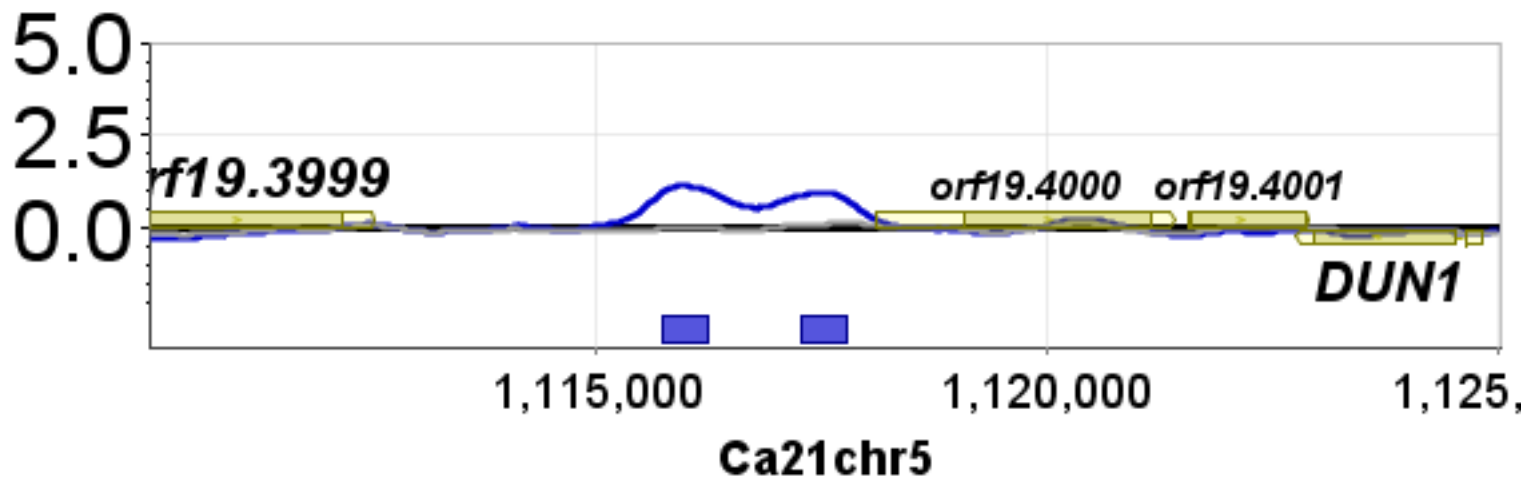

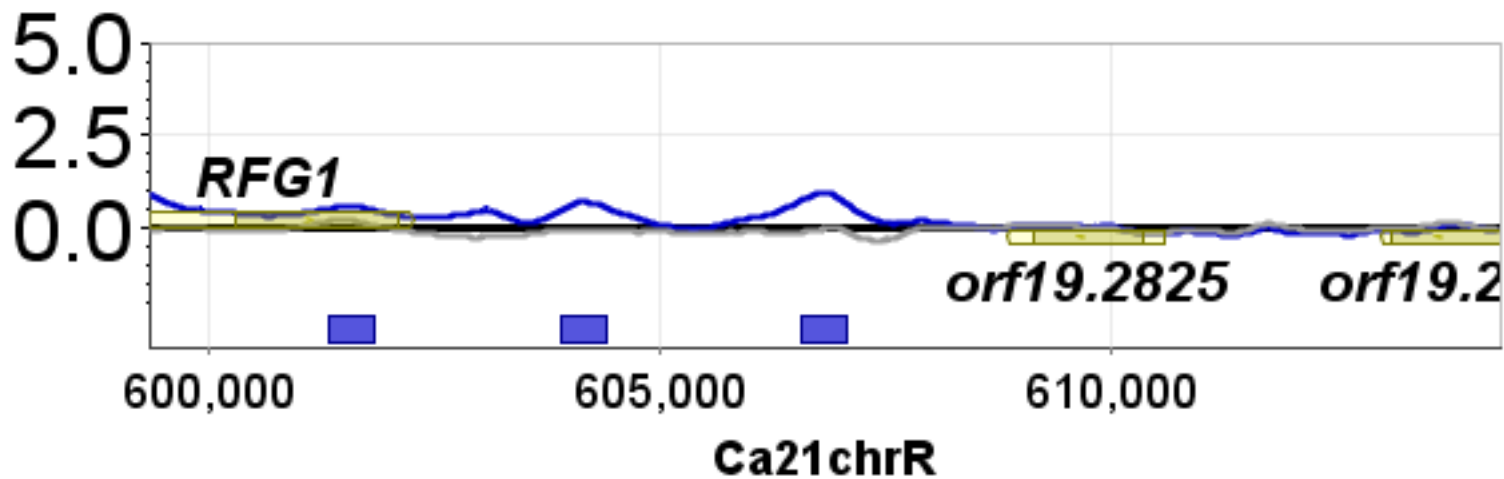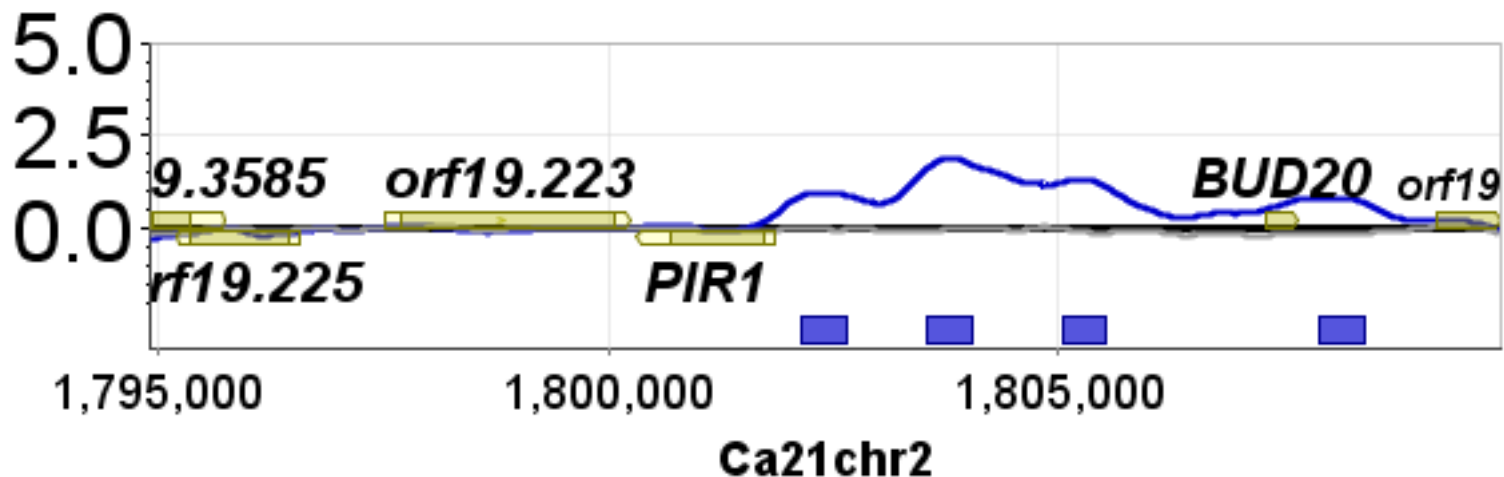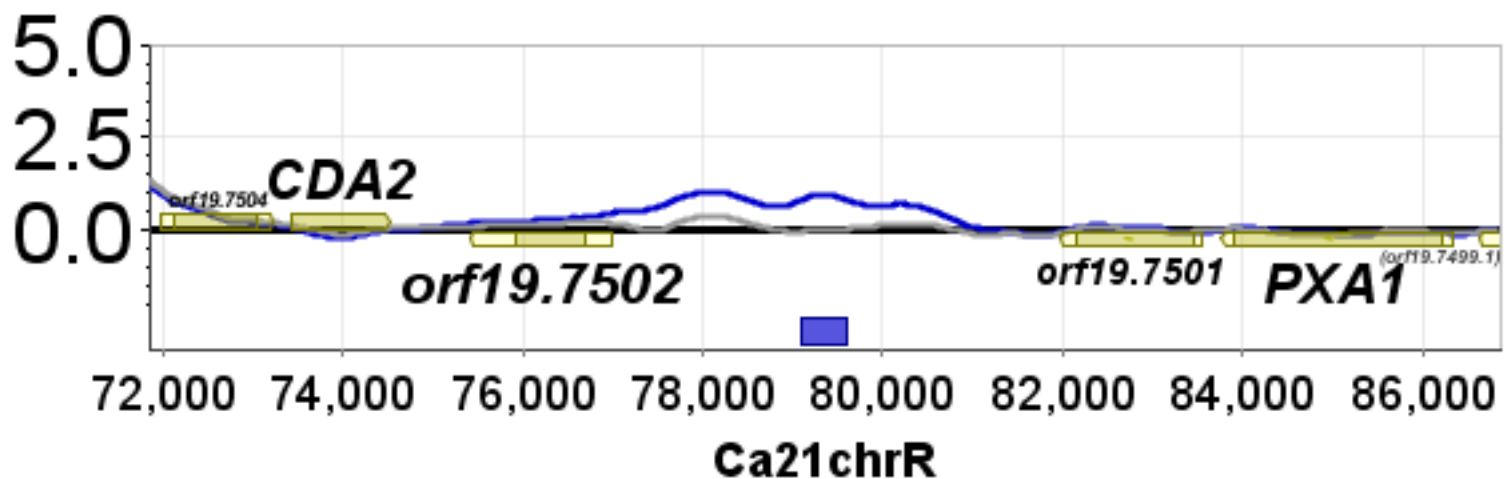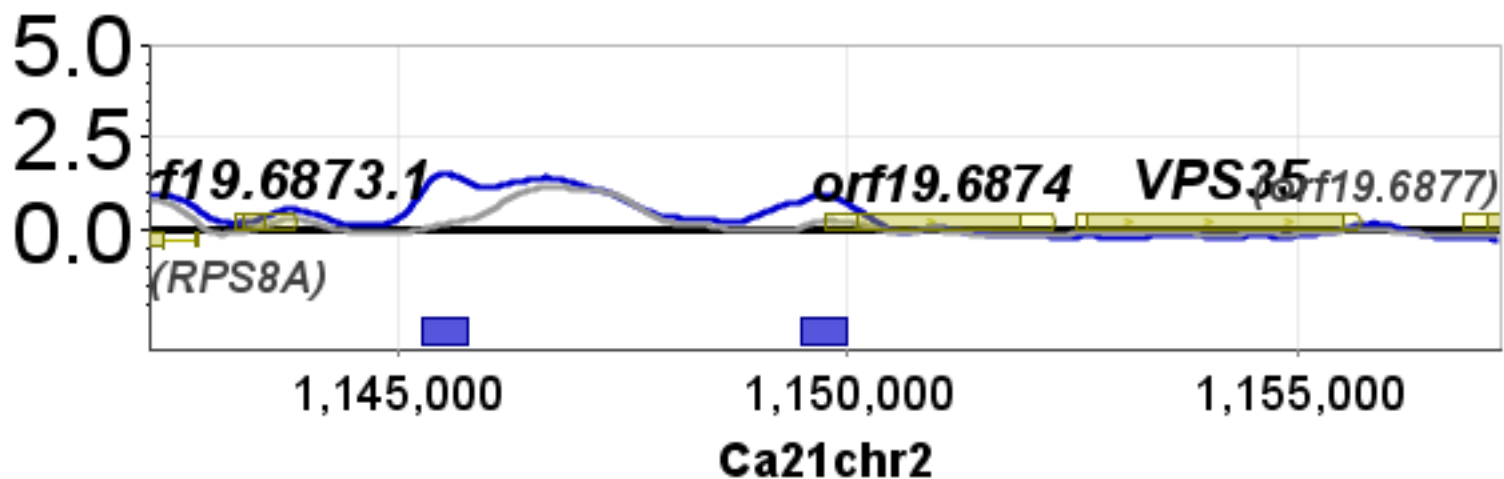

[0.951] Ca21chr1:814819-829818 [+] [orf19.4461, orf19.4463, SEN15, orf19.4465, orf19.4459]

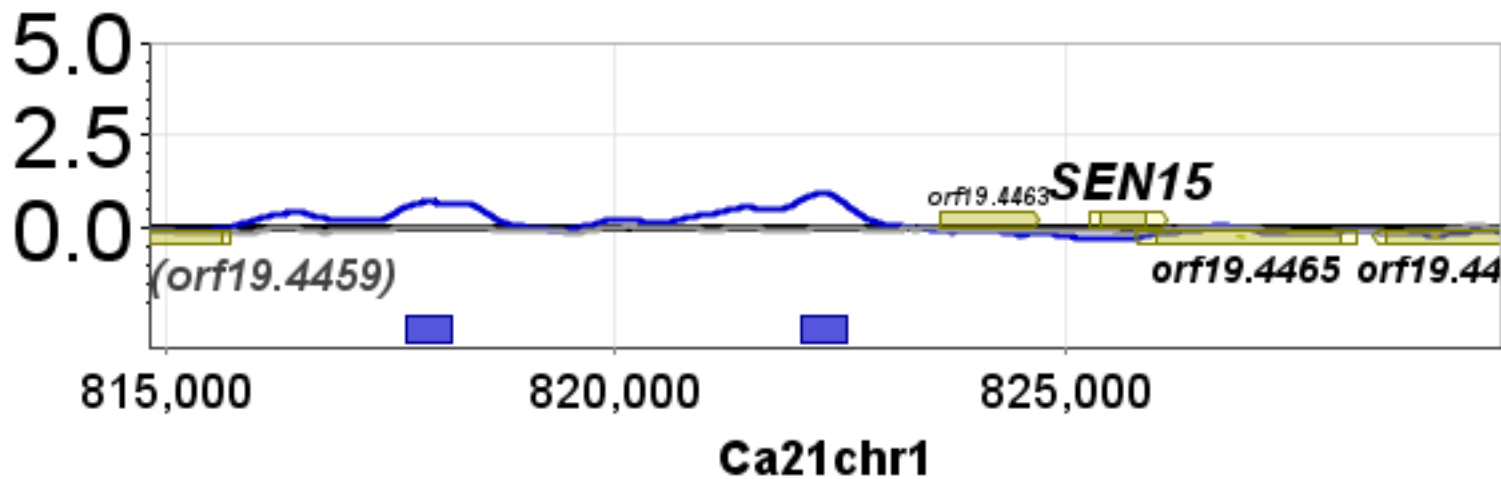

[0.938] Ca21chr3:1205745-1220744 [+] [orf19.6982, ntar\_632, orf19.6983, orf19.6981, orf19.6980]

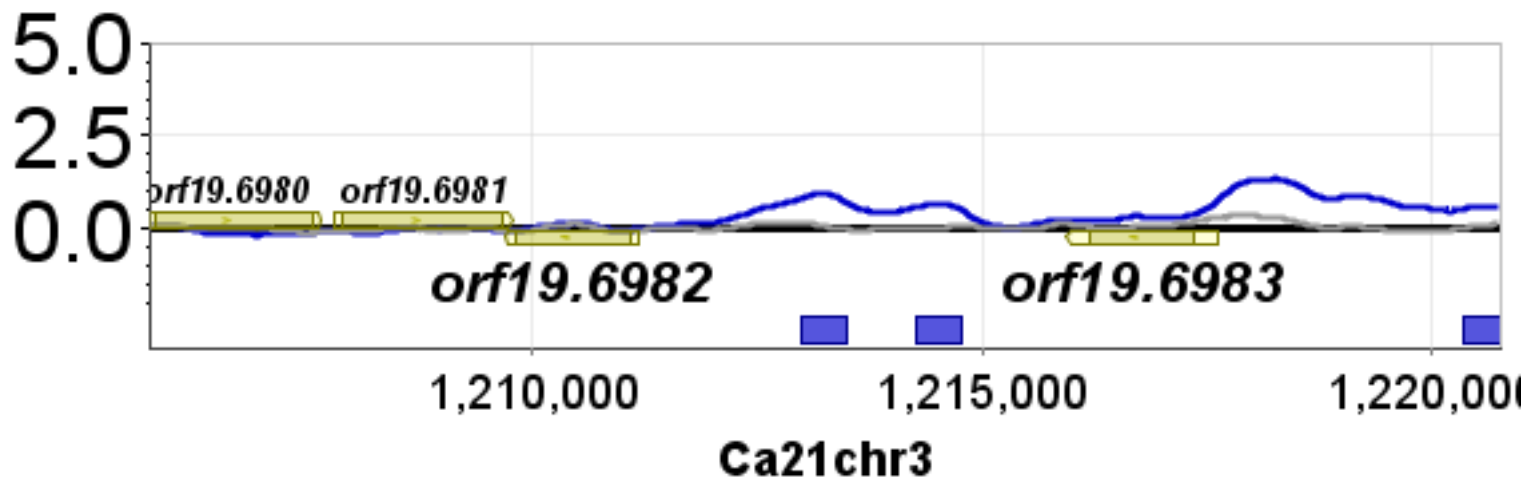

[0.93] Ca21chr1:1492037-1507036 [+] [RBT4, orf19.6203, orf19.6200, orf19.6205, orf19.6199]

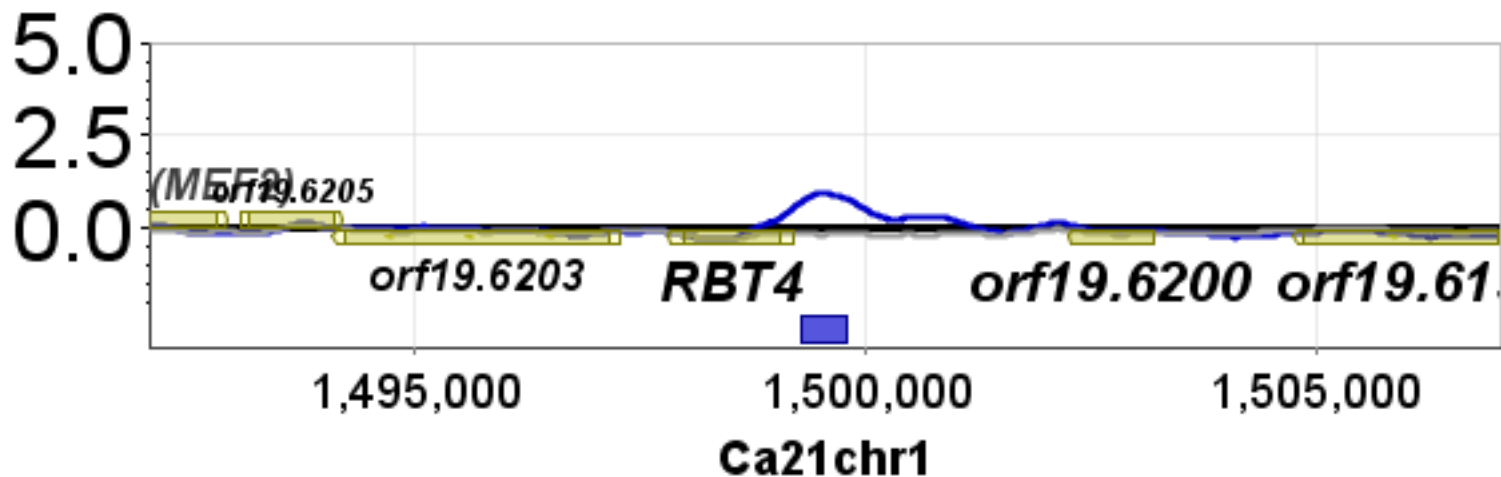

[0.929] Ca21chr4:568030-583029 [+] [ntar\_770, HIT1, CGR1, orf19.2724, orf19.2721]

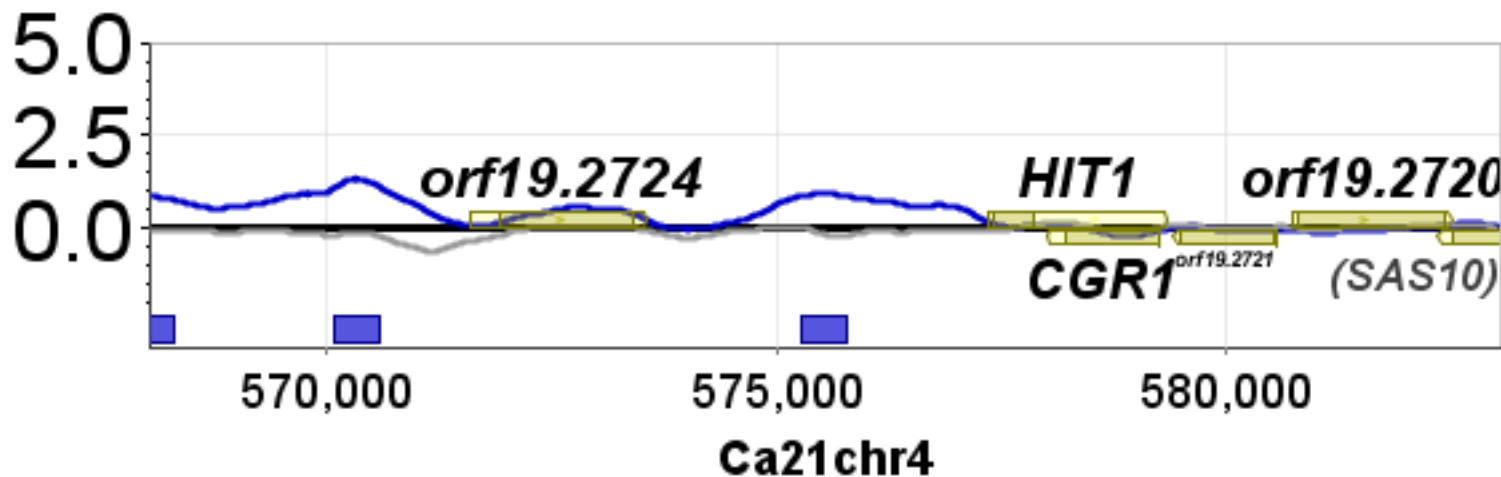

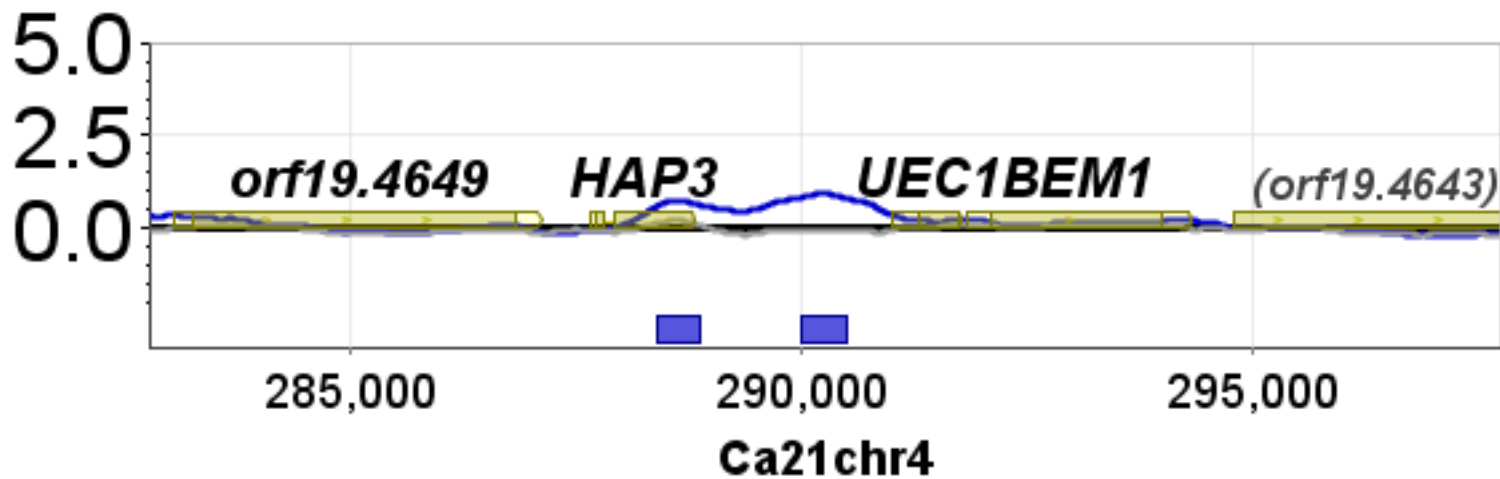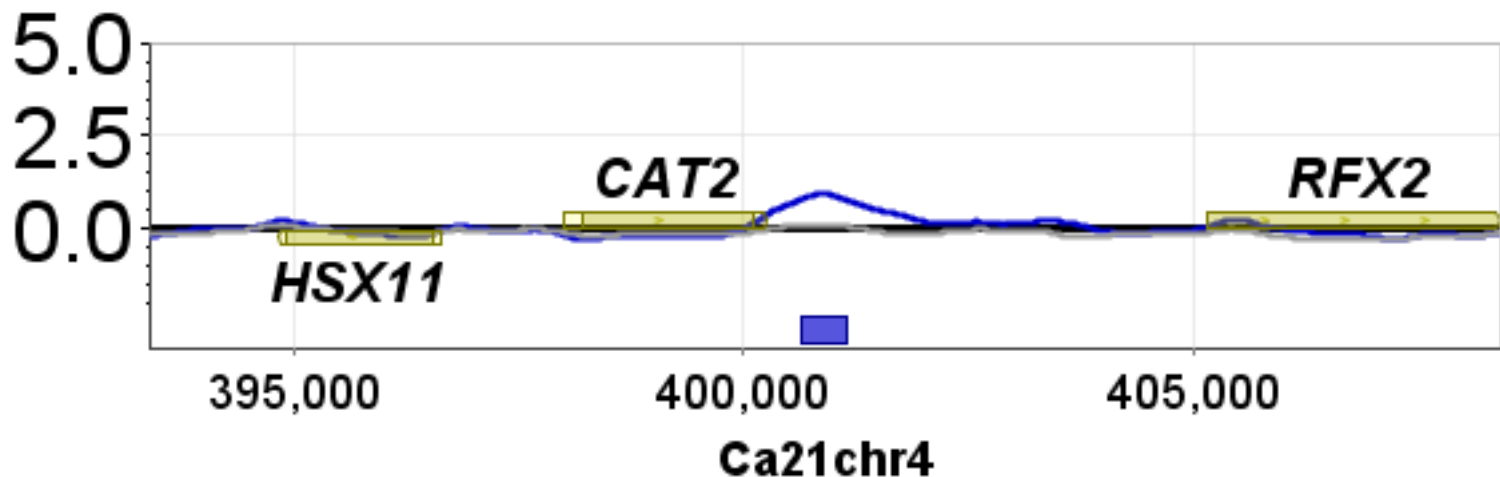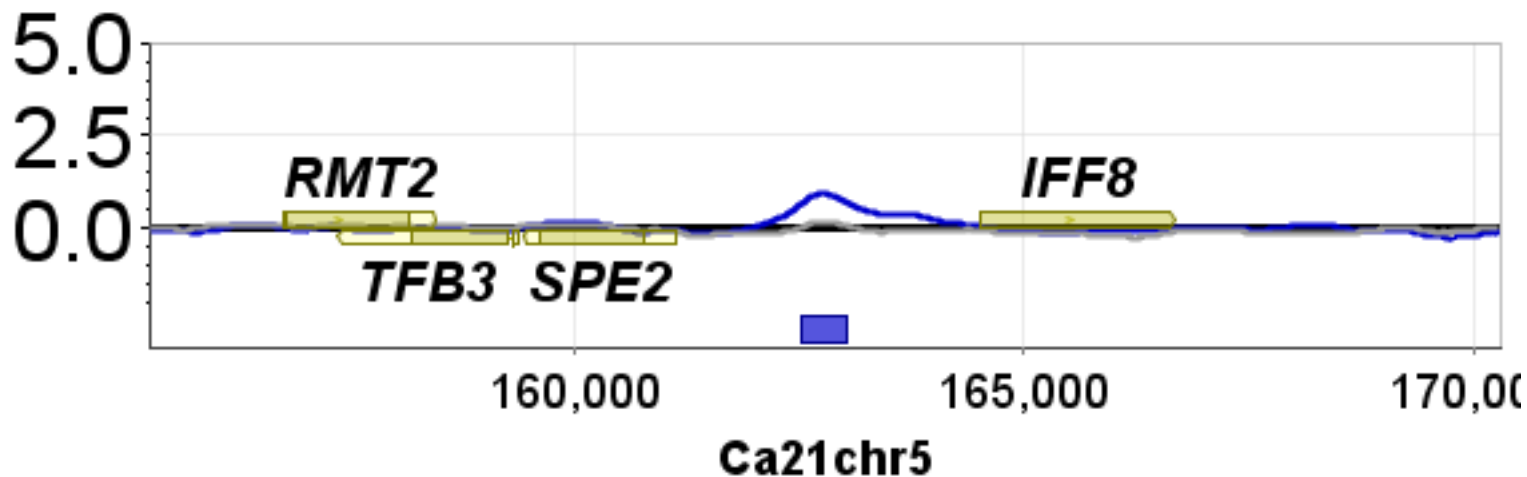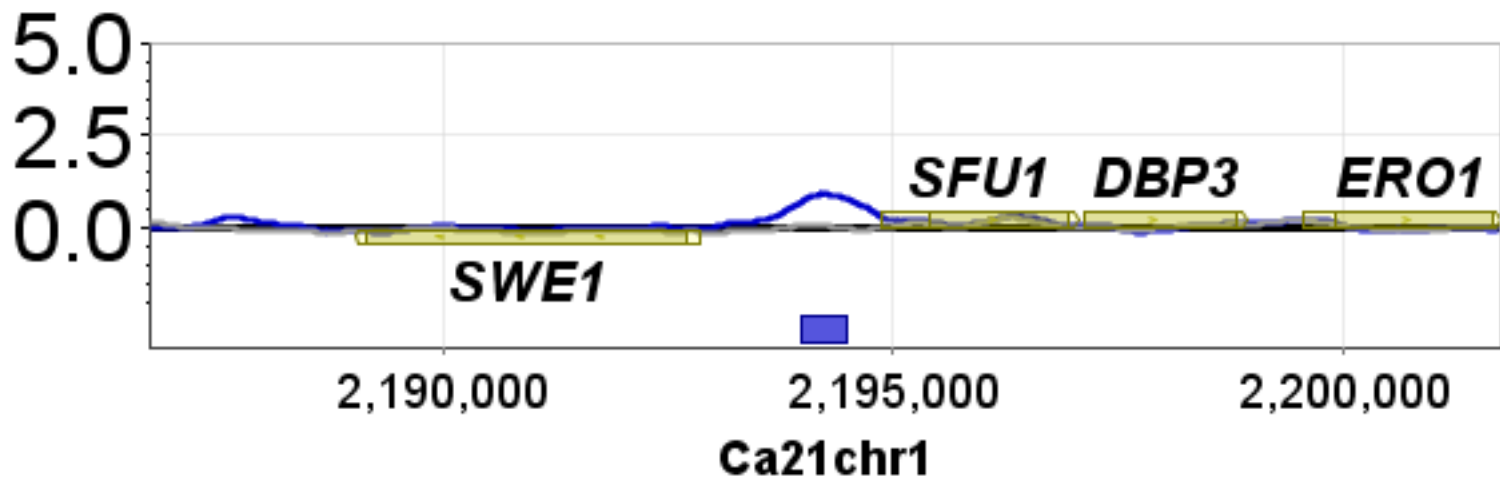



[0.901] Ca21chr2:1737345-1752344 [+] [ntar\_449, ntar\_451, ntar\_450, ntar\_452, ntar\_448]

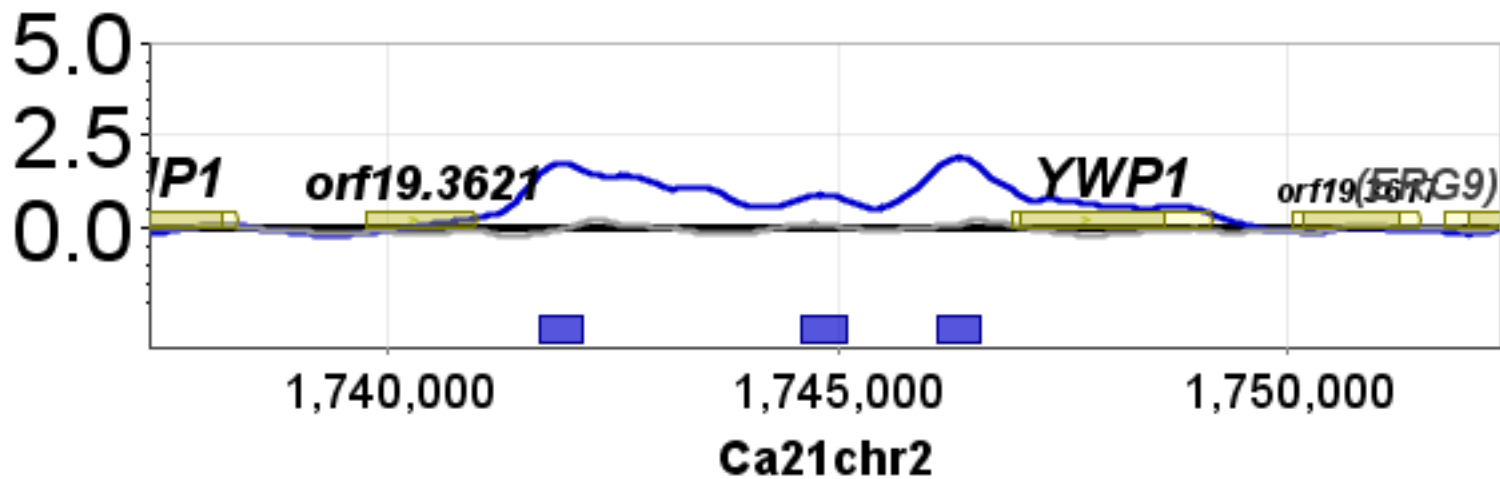

[0.899] Ca21chr4:1517374-1532373 [+] [CZF1, CCT6, orf19.3125, orf19.3128, orf19.3124]

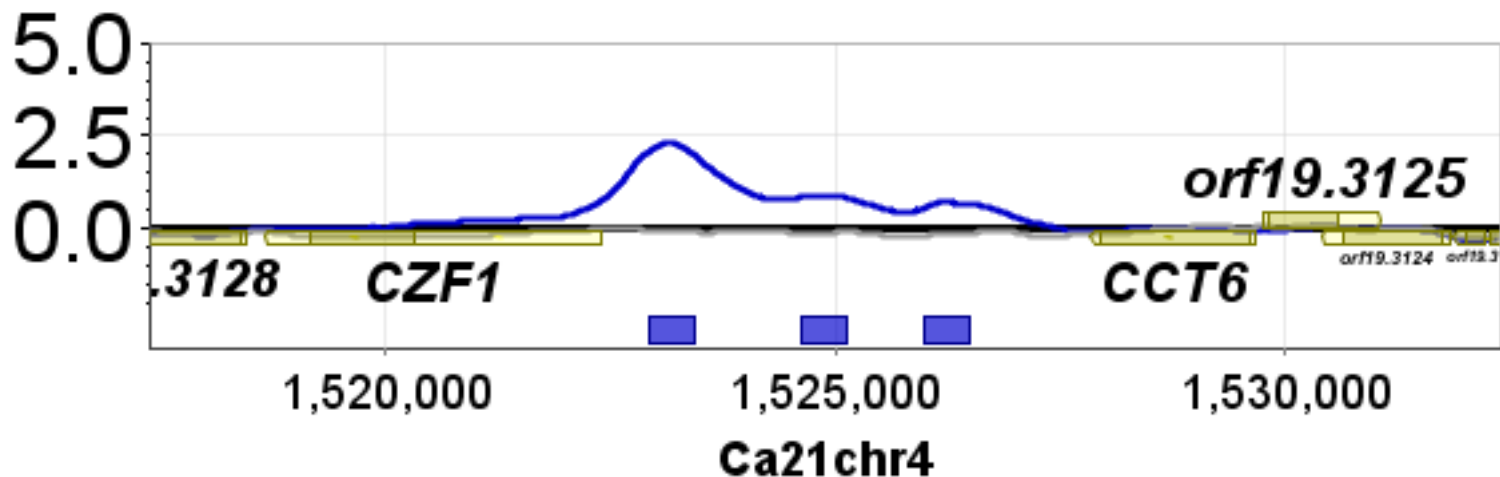

[0.896] Ca21chrR:872749-887748 [+] [ntar\_1253, orf19.467, ntar\_1254, ntar\_1255, HST7]

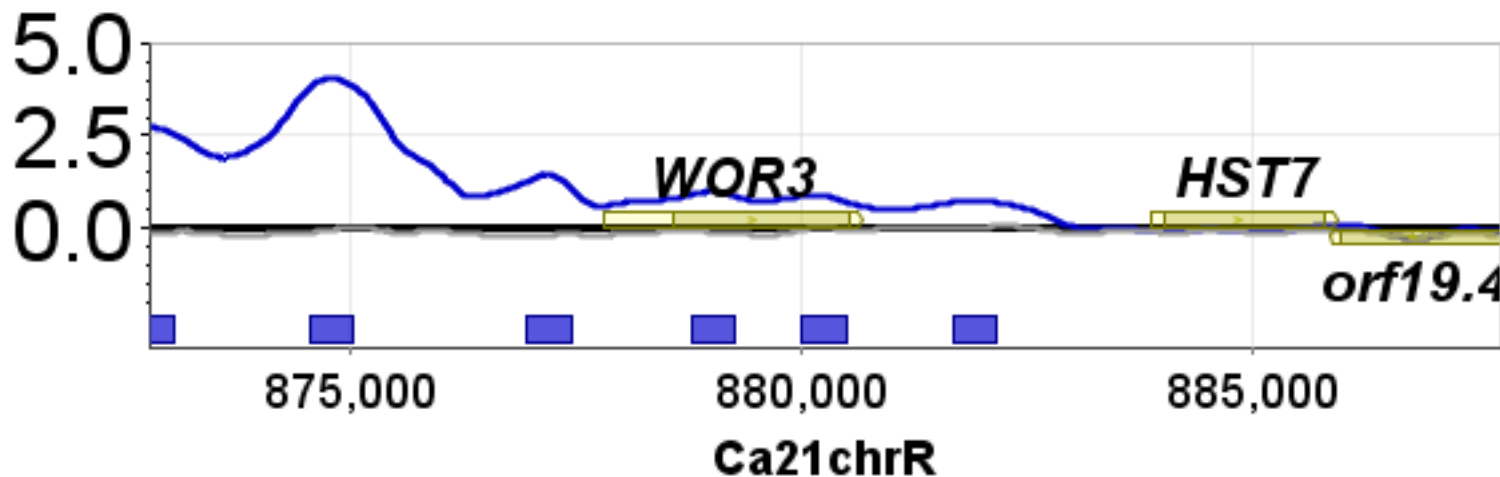

[0.894] Ca21chr5:914786-929785 [+] [CHT2, orf19.3897, orf19.3894, ntar\_941, orf19.3898]

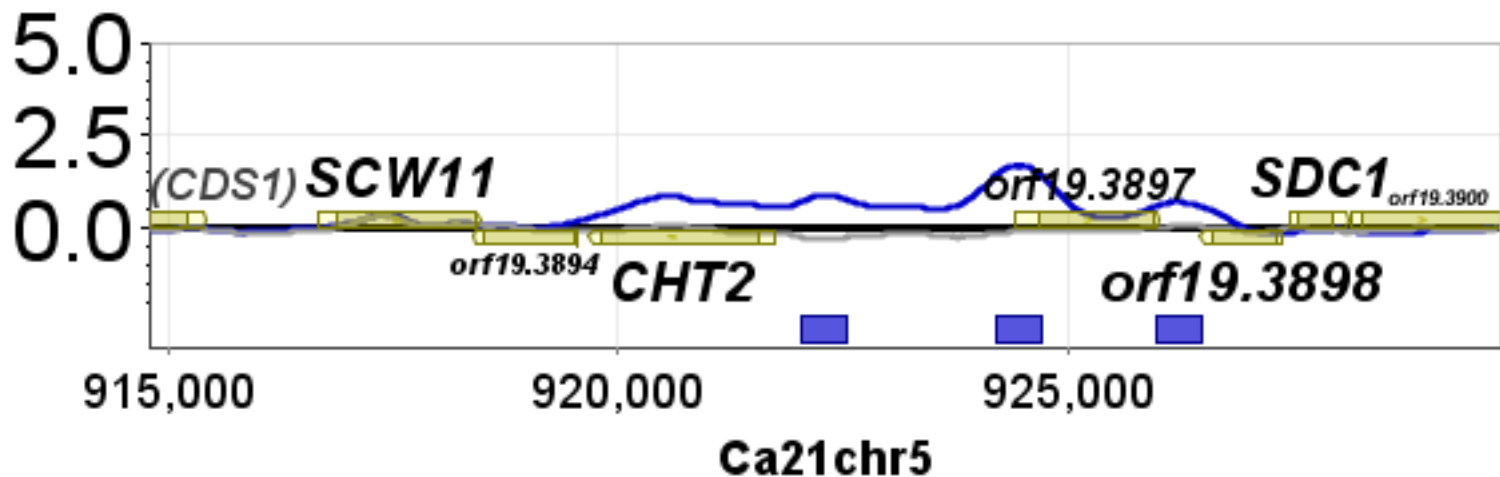

[0.892] Ca21chrR:1470757-1485756 [+] [ALG6, orf19.1842, ntar\_1329, ts(aga)2, orf19.1844]

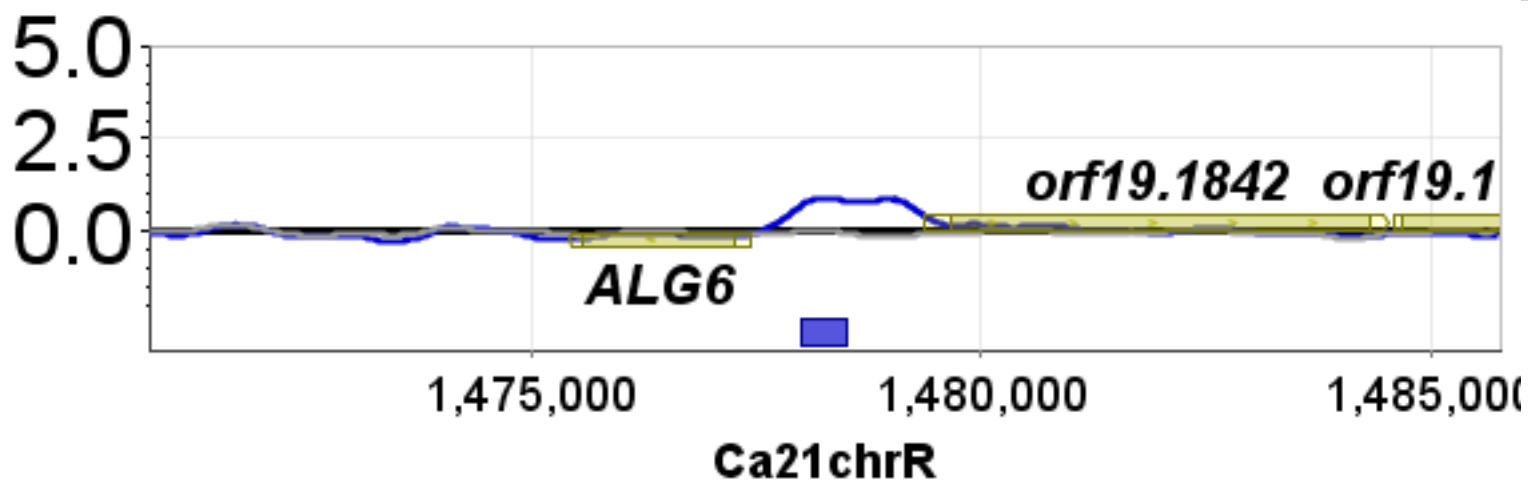

[0.89] Ca21chr1:2395281-2410280 [+] [orf19.2332, orf19.2333, ADA2, RPS17B, BIG1]

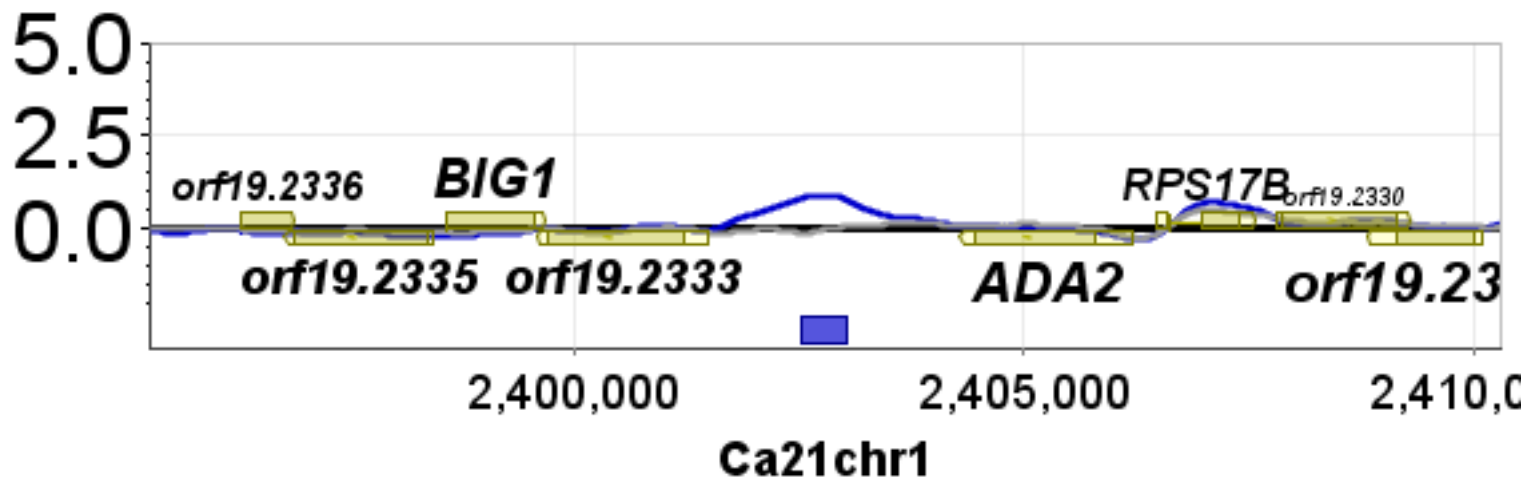

[0.889] Ca21chr5:713311-728310 [+] [ntar\_1412, orf19.4349, orf19.2657, orf19.4348]

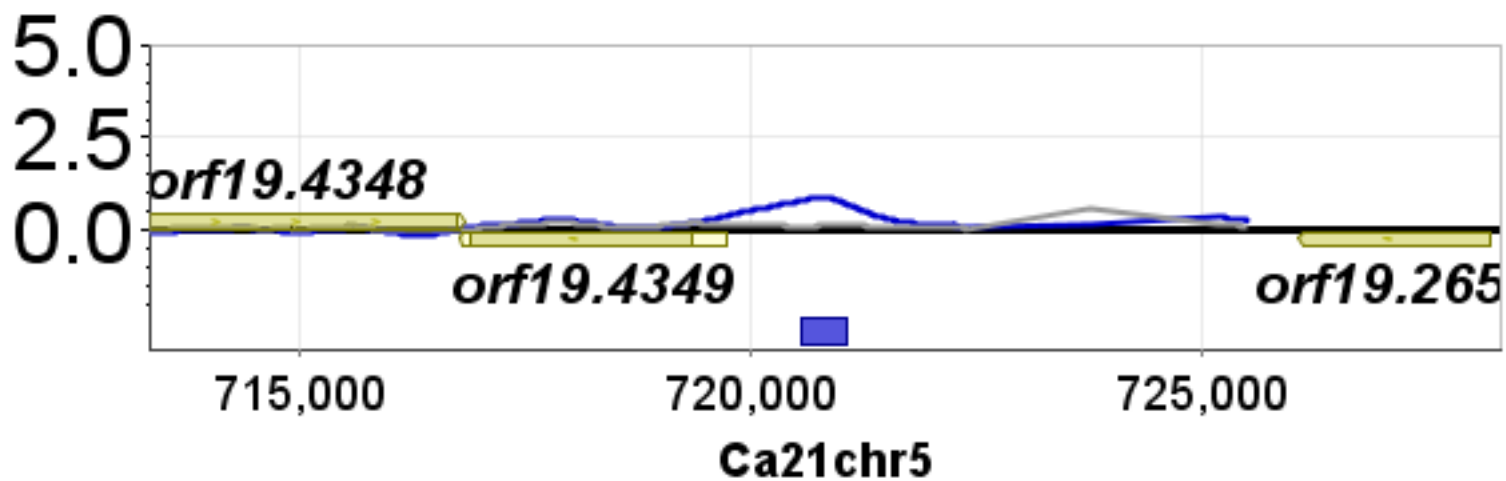

[0.884] Ca21chr4:271315-286314 [+] [PGA53, ntar\_735, ntar\_734, ILV6, ntar\_733]

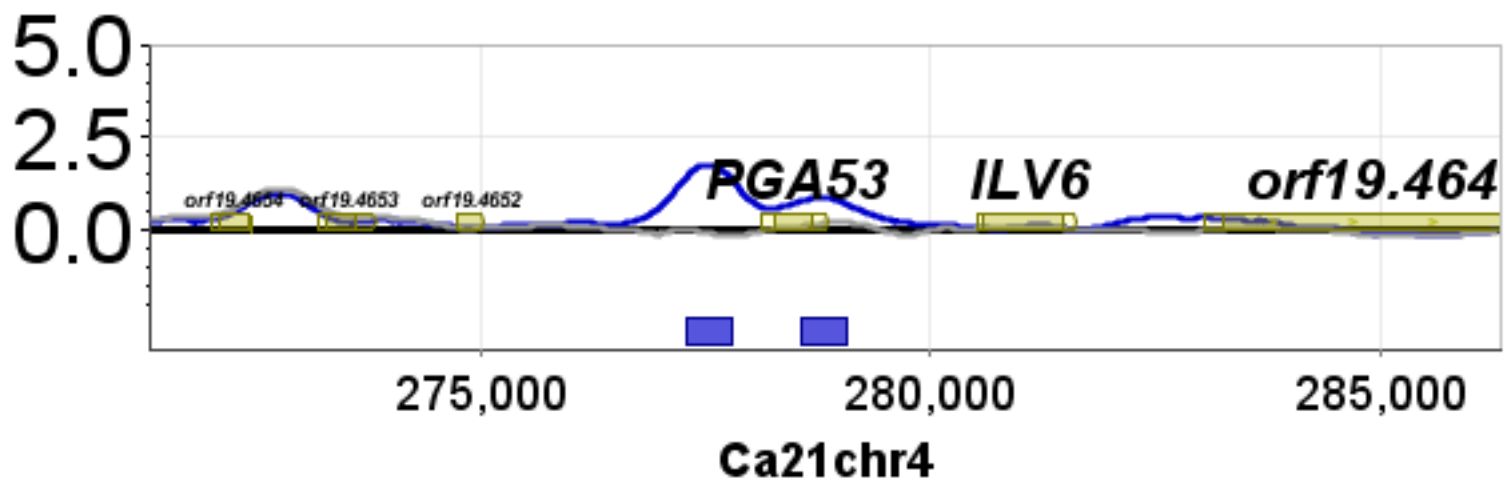

[0.878] Ca21chr1:1515248-1530247 [+] [GAP4, TAF145, orf19.6194, ntar\_136, orf19.6195]

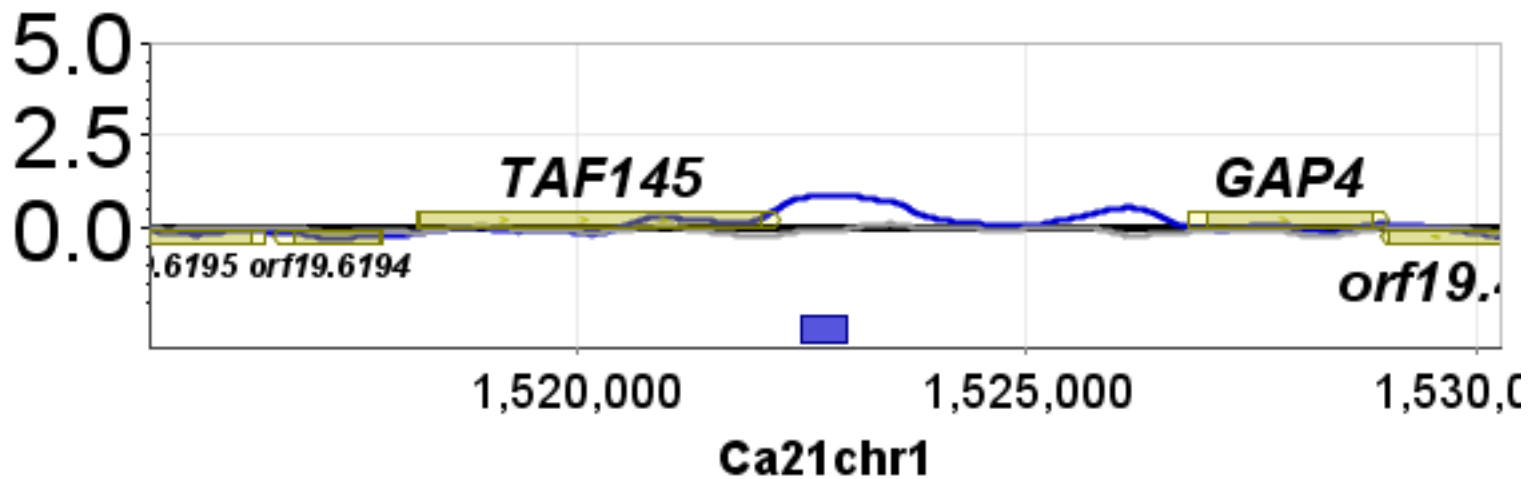

[0.871] Ca21chrR:5790-20789 [+] [INO2, orf19.7539.1, tl(caa)6, orf19.7538, BNR1]

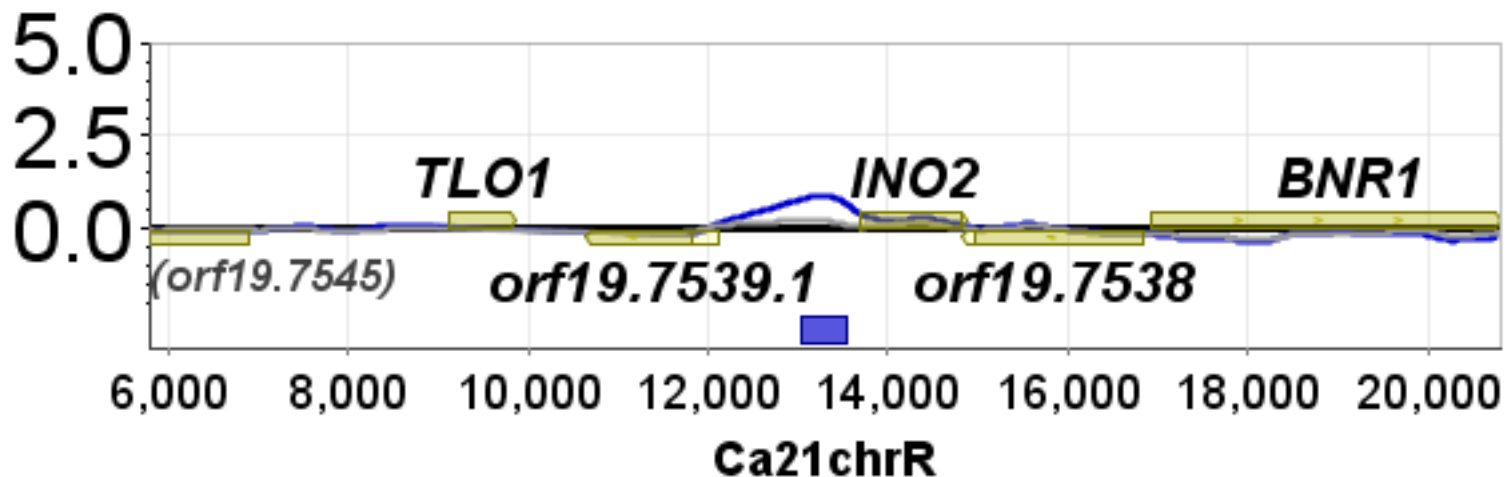

[0.868] Ca21chrR:437249-452248 [+] [OPT1, orf19.2604, orf19.2605, HEM1, HDA1]

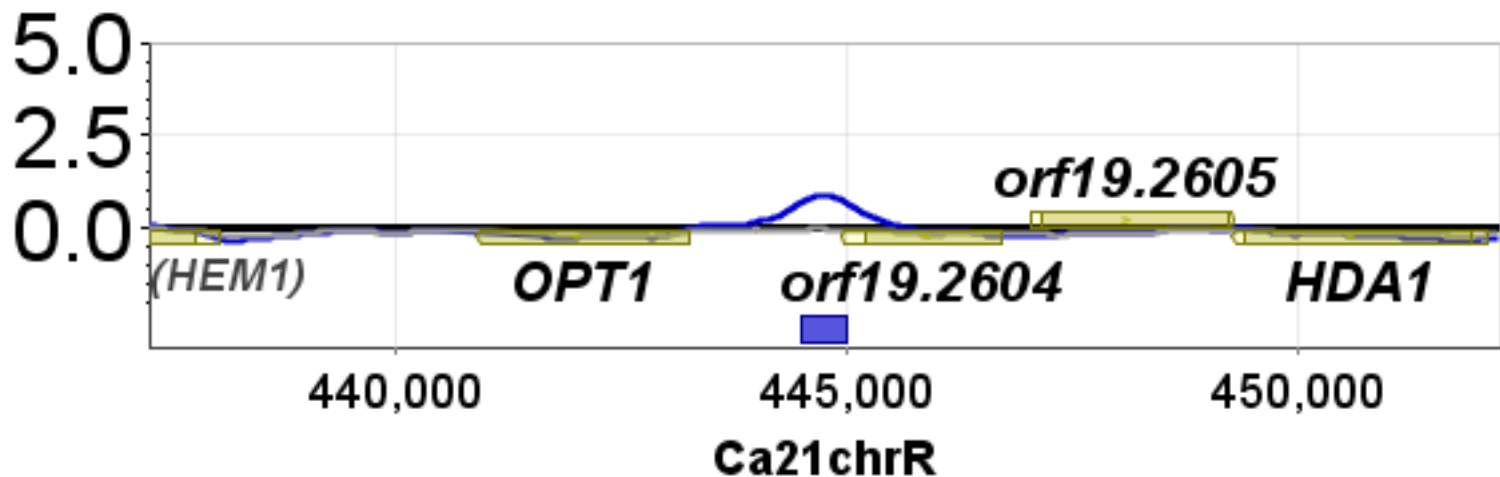

[0.861] Ca21chr3:1168073-1183072 [+] [ntar\_627, ntar\_626, orf19.6968, USO6, orf19.6966]

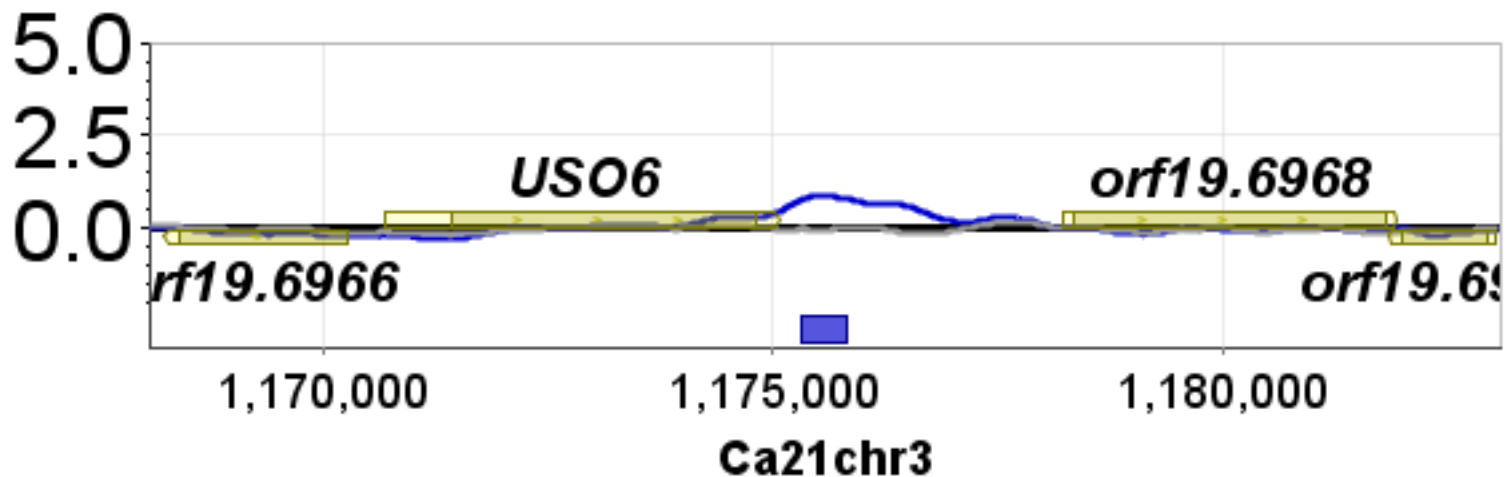

[0.859] Ca21chr7:621494-636493 [+] [ENA21, PMT1, orf19.5169, LIP9, TAF19]

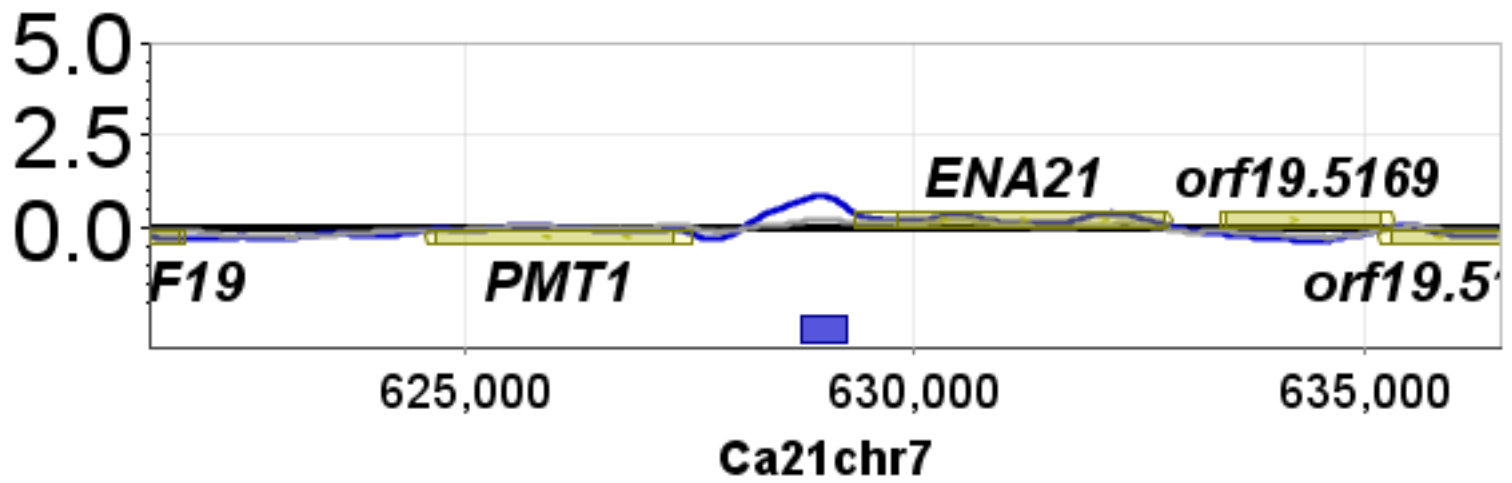

[0.849] Ca21chr4:560552-575551 [+] [orf19.2725, orf19.2724, ntar\_770]

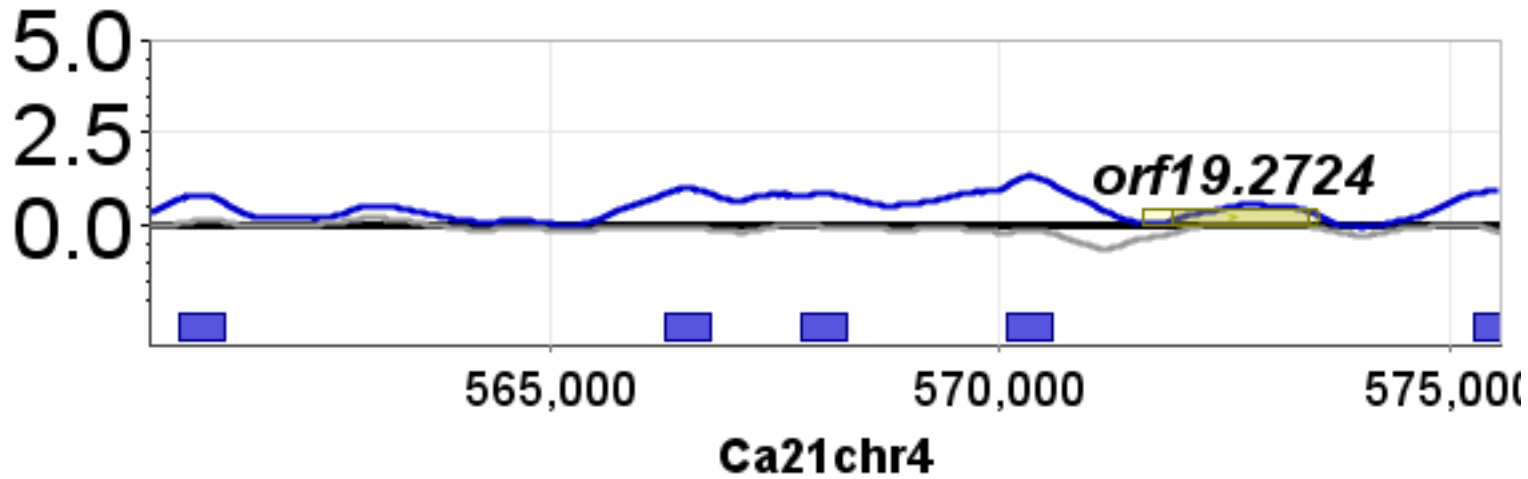

[0.849] Ca21chr5:253501-268500 [+] [CYC3, ntar\_867, orf19.1956, ntar\_866, ntar\_1424]

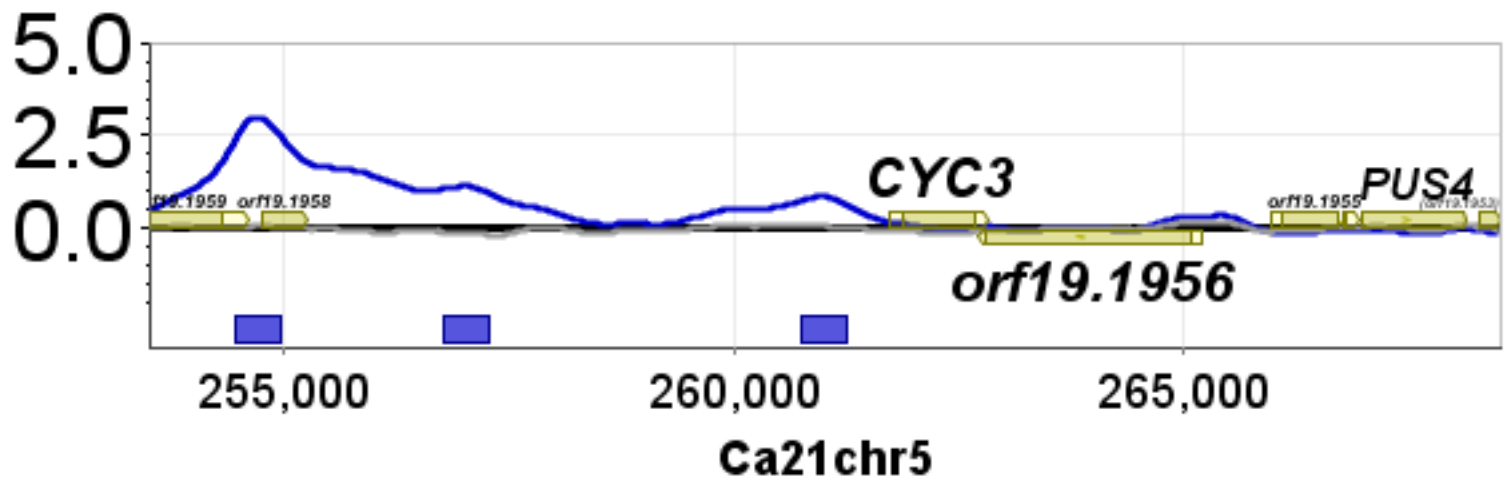

[0.842] Ca21chr3:1215445-1230444 [+] [ntar\_633, orf19.6984, orf19.6983, TEA1, ntar\_632]

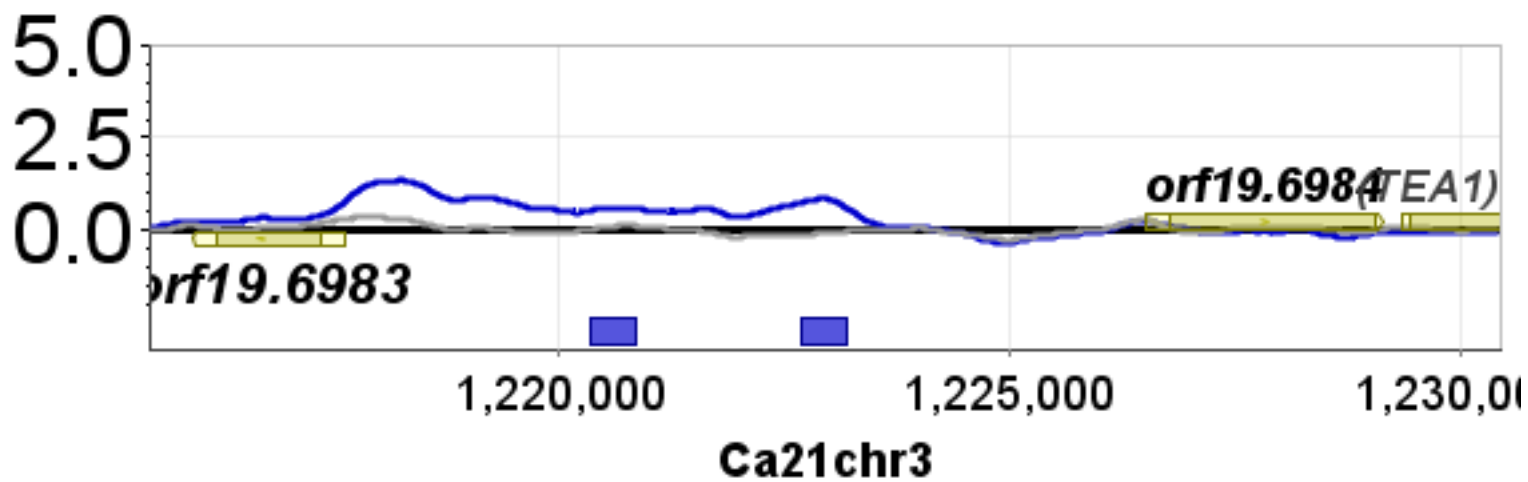

[0.835] Ca21chr6:148009-163008 [+] [SUN41, orf19.3643, CAN3]

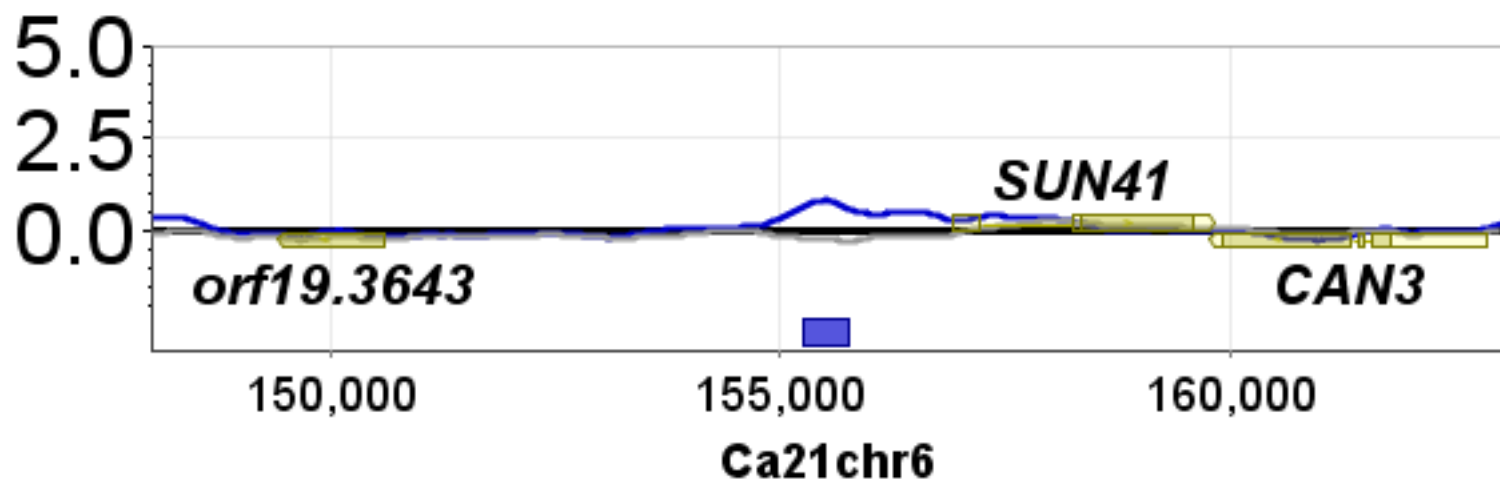

[0.828] Ca21chrR:1252053-1267052 [+] [Intar\_1291, SFL1, ntar\_1292, orf19.457]

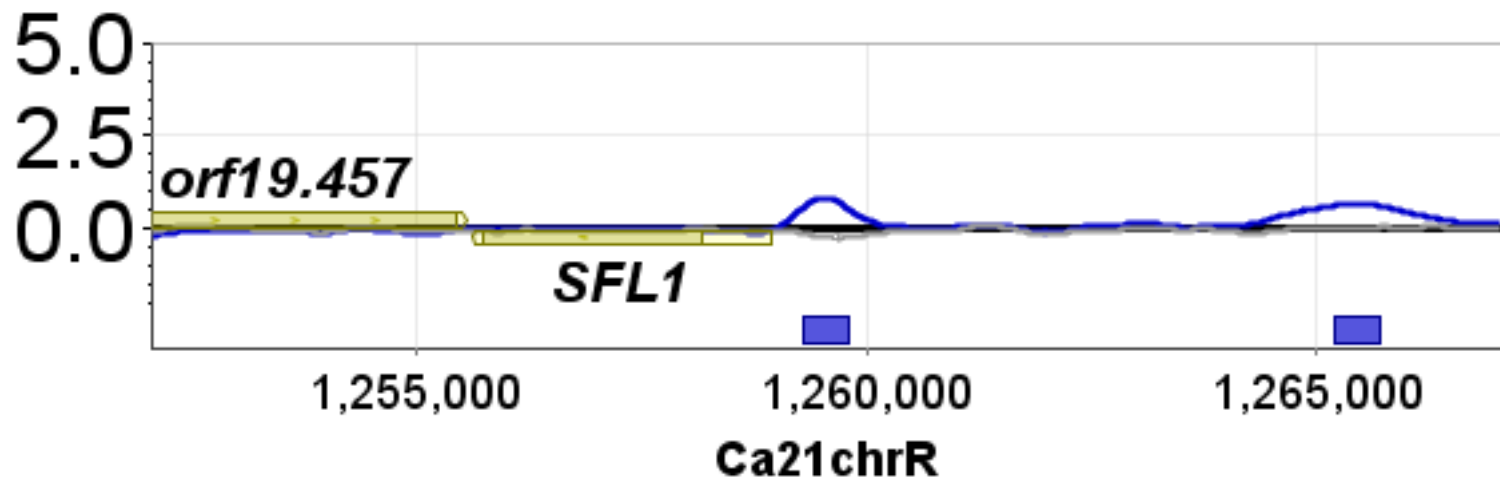

[0.825] Ca21chr4:553634-568633 [+] [orf19.2726, ntar\_769, GRX3, orf19.2728, orf19.2725]

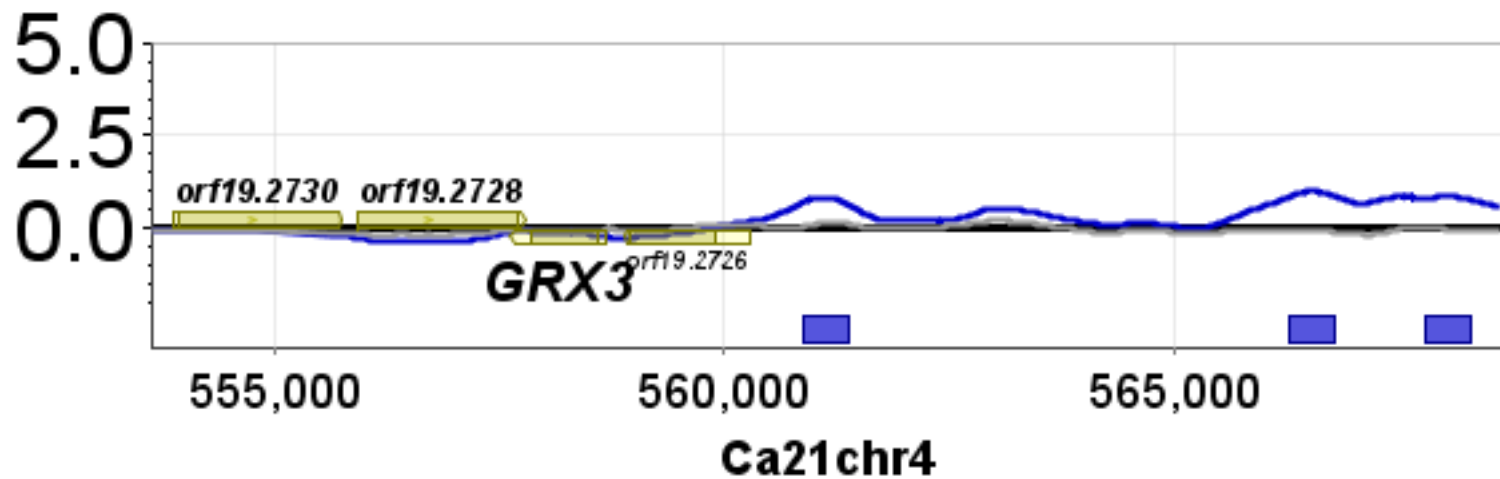

[0.824] Ca21chrR:1364603-1379602 [+] [BCR1, orf19.725, orf19.721, PPZ1]

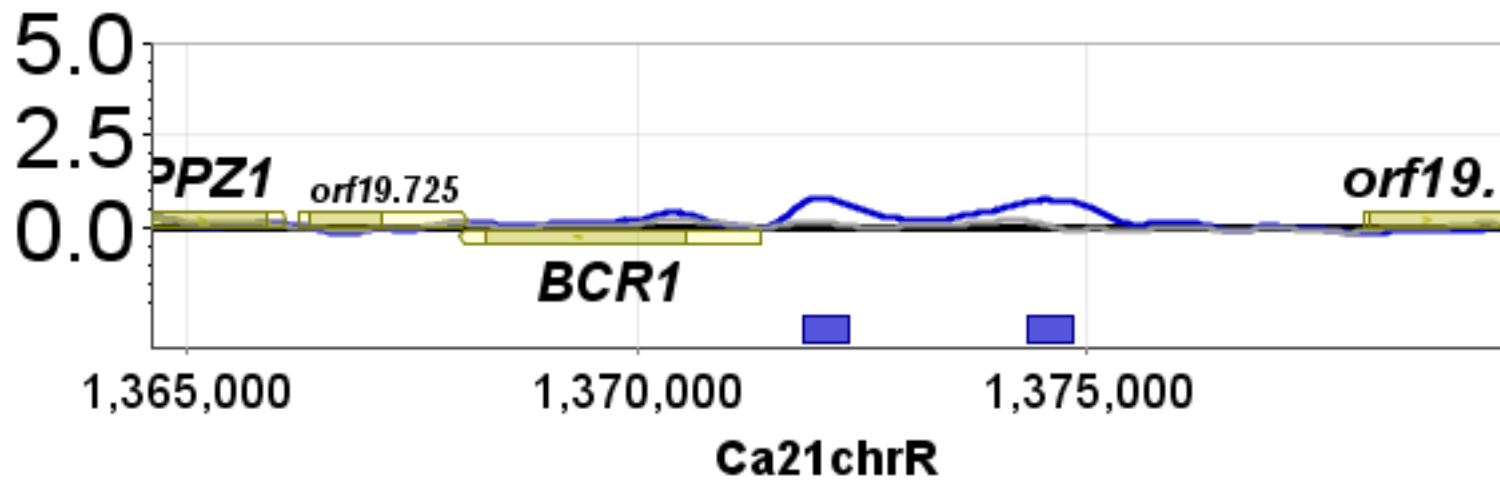

[0.818] Ca21chr1:1317778-1332777 [+] [orf19.1821]

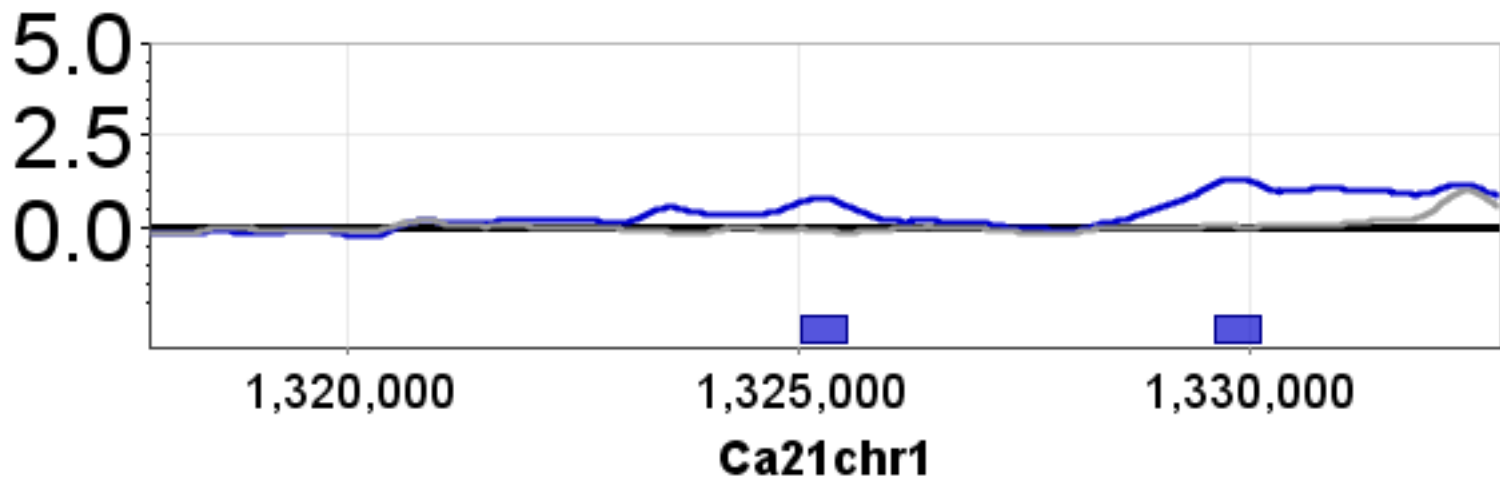

[0.817] Ca21chr2:1800652-1815651 [+] [BUD20, orf19.217, orf19.216.1, PIR1, orf19.216]

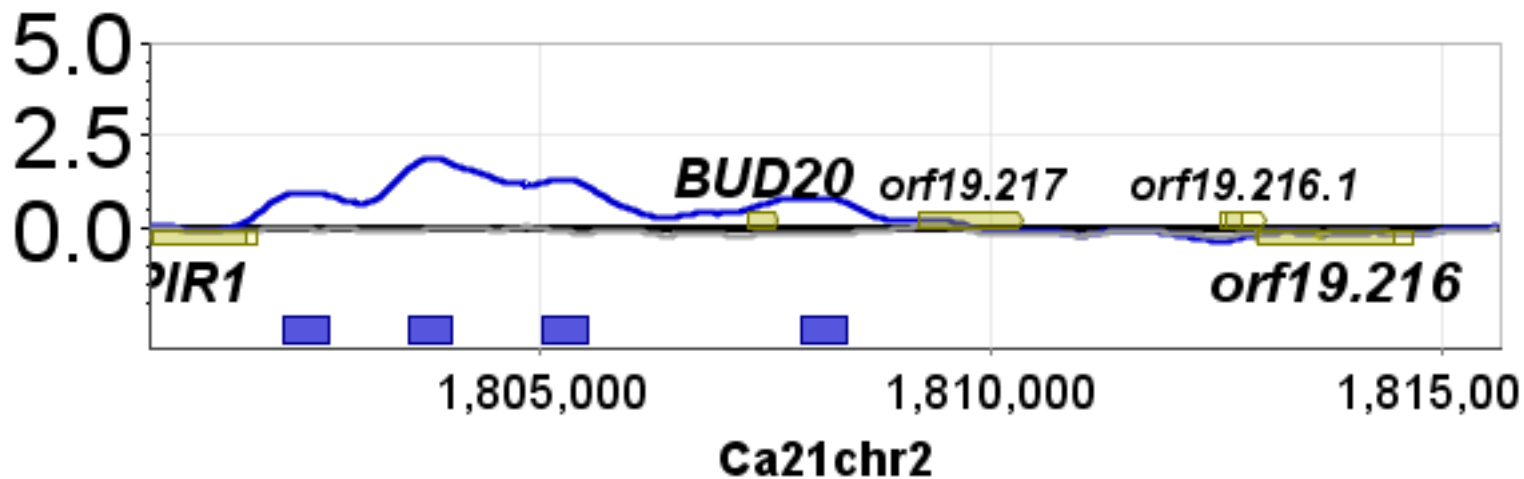

[0.811] Ca21chr5:687925-702924 [+] [ntar\_913, orf19.4342, orf19.4341, orf19.4340.1, orf19.4340]

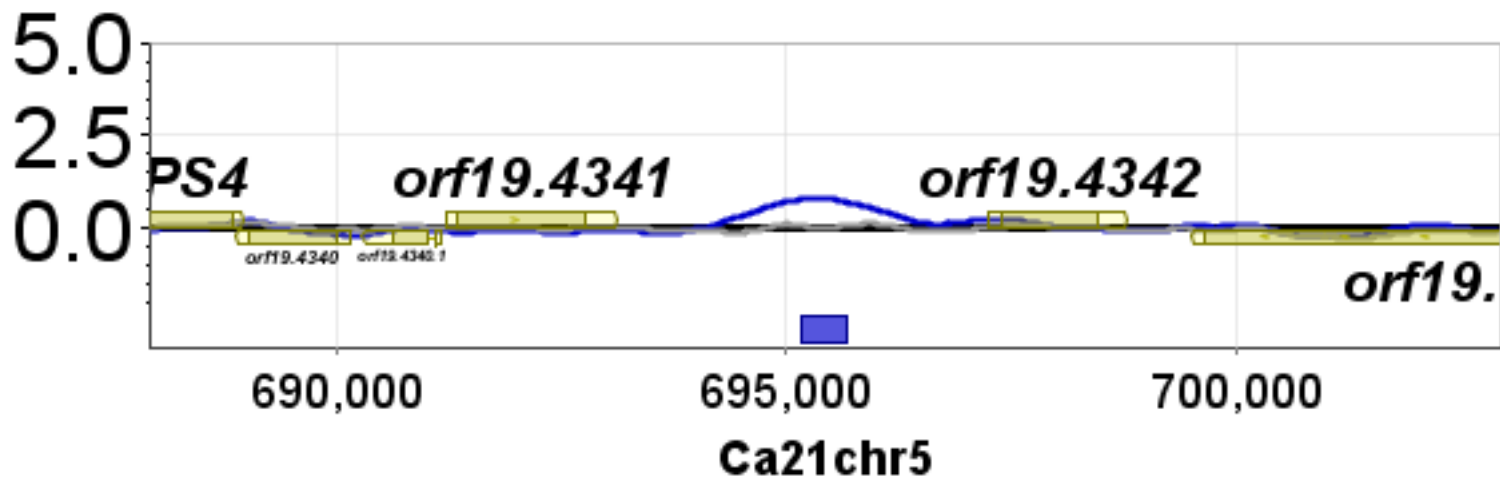

[0.81] Ca21chr7:370969-385968 [+] [ISU1, orf19.6547, ntar\_1096, LPI9, orf19.6550]

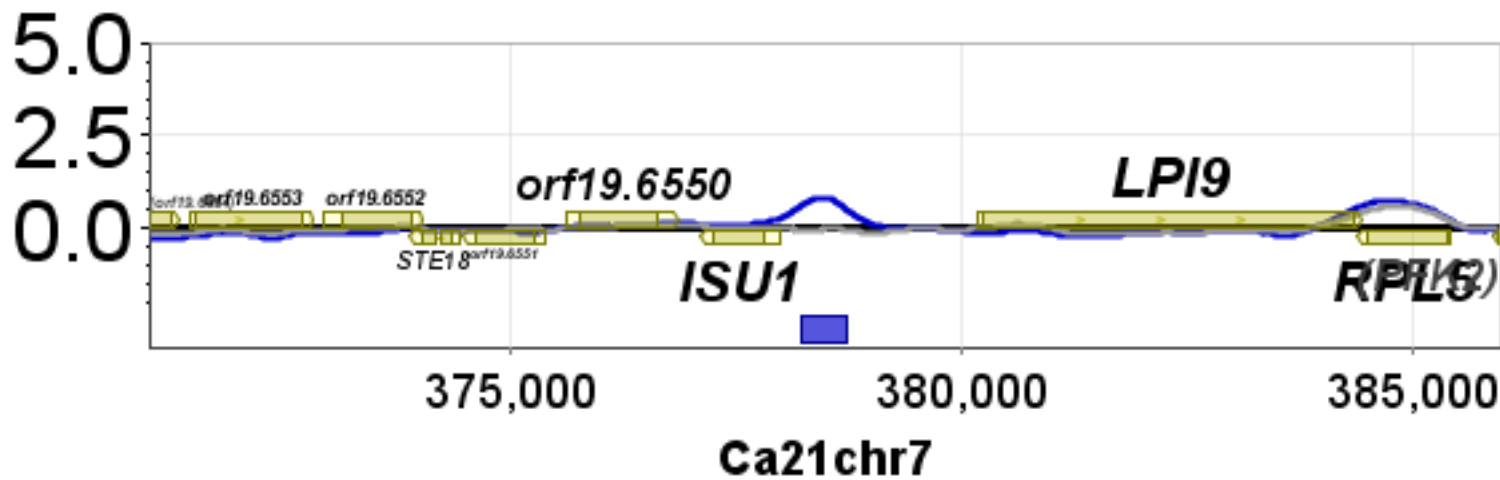

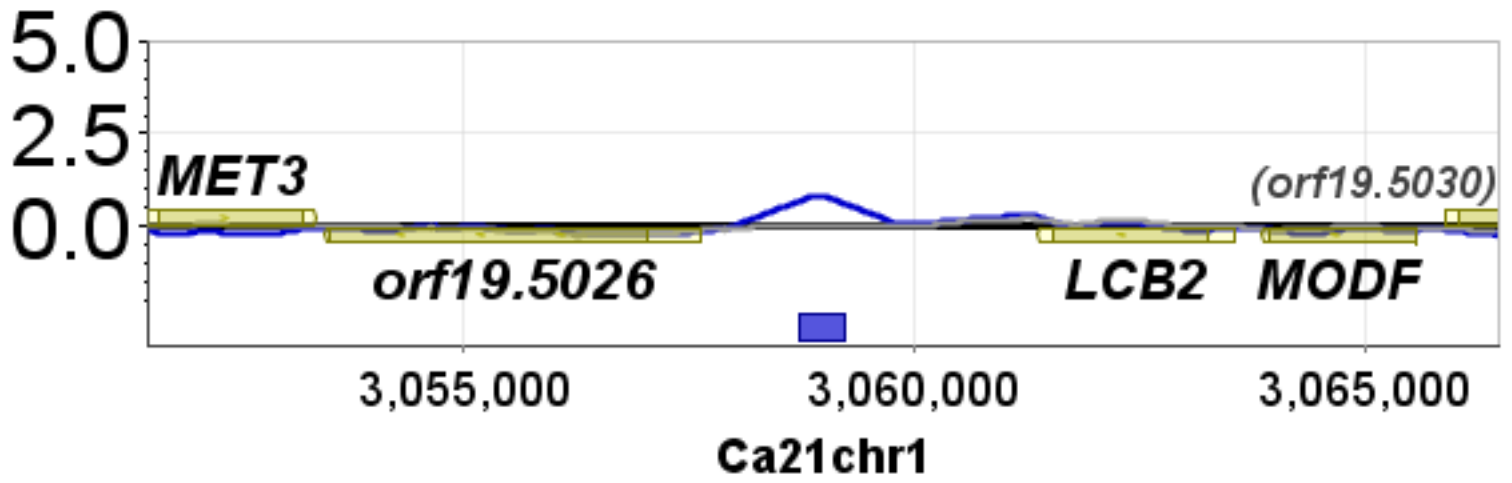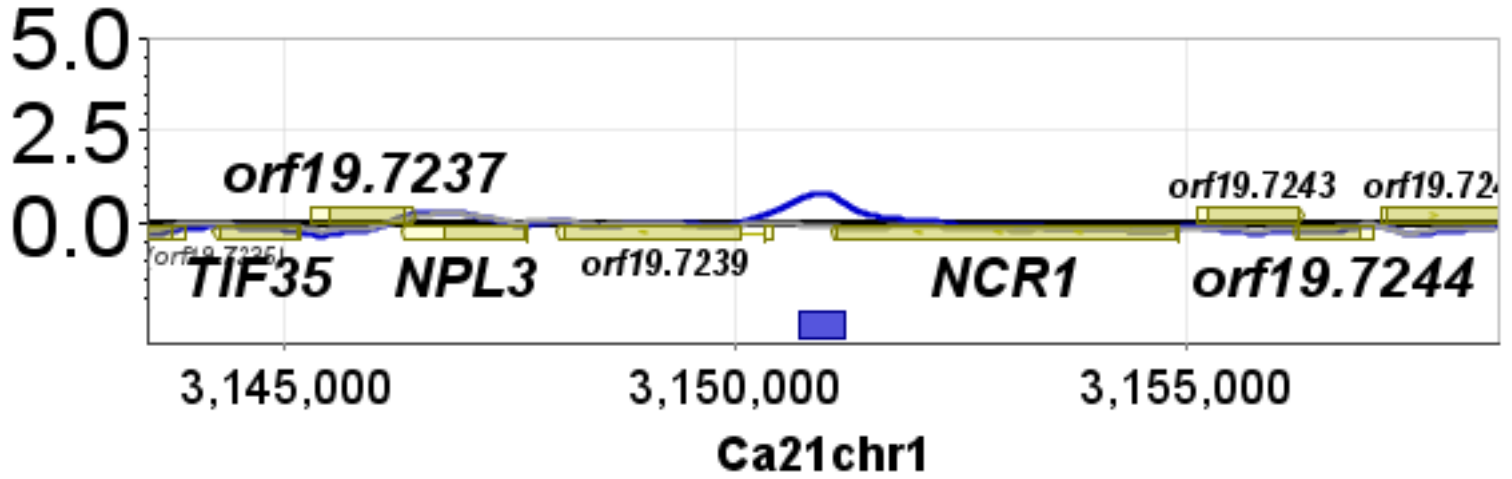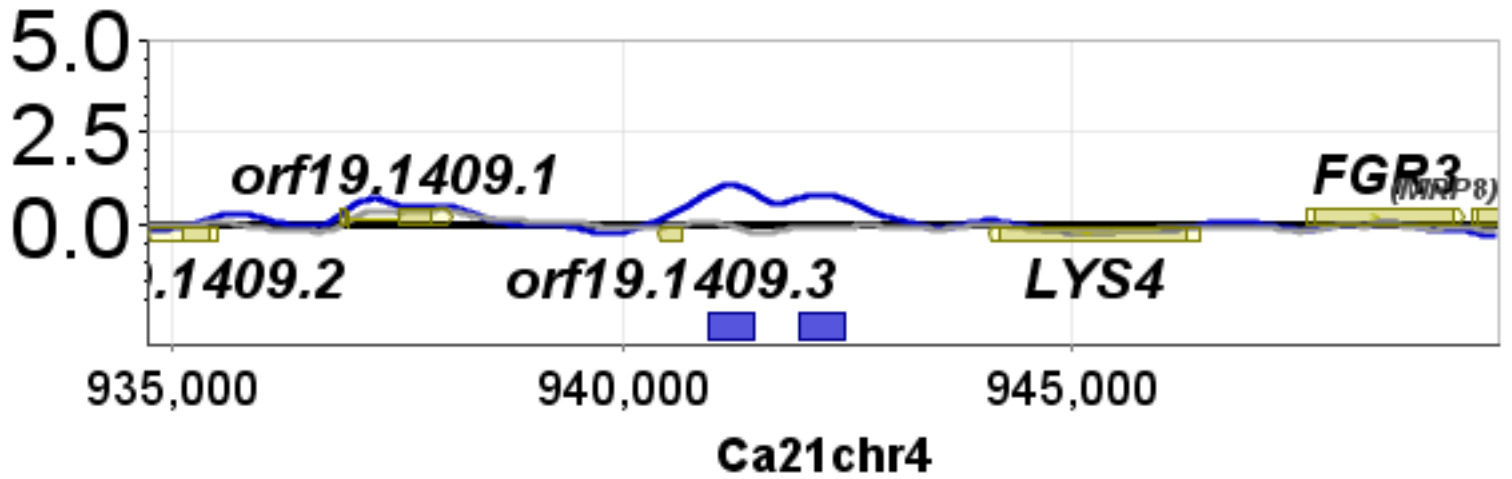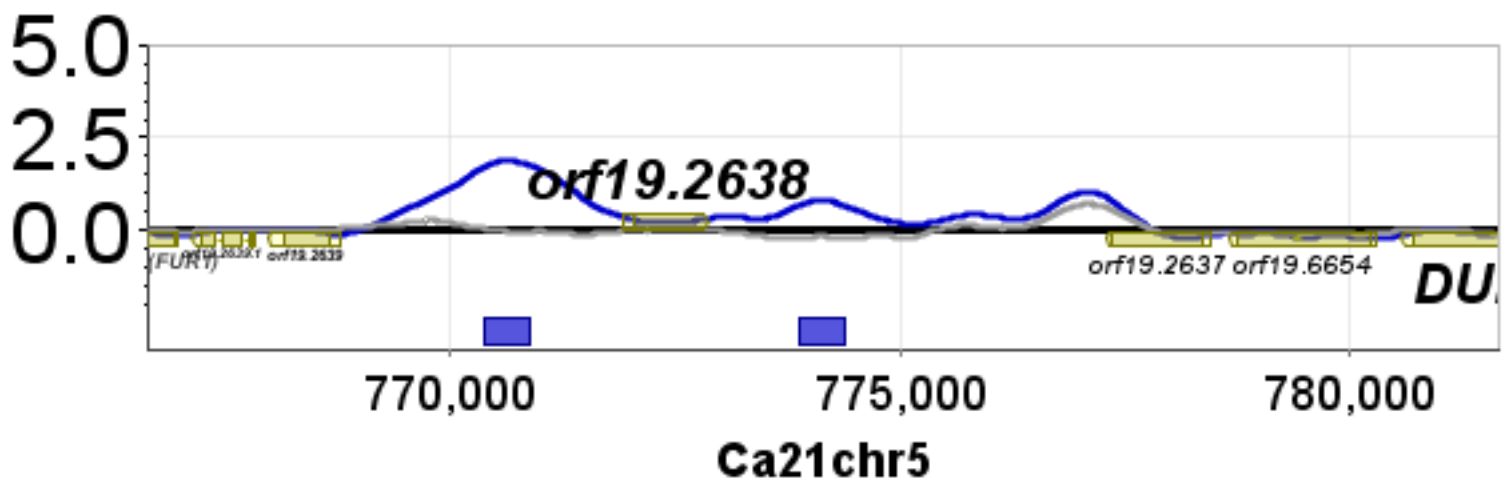

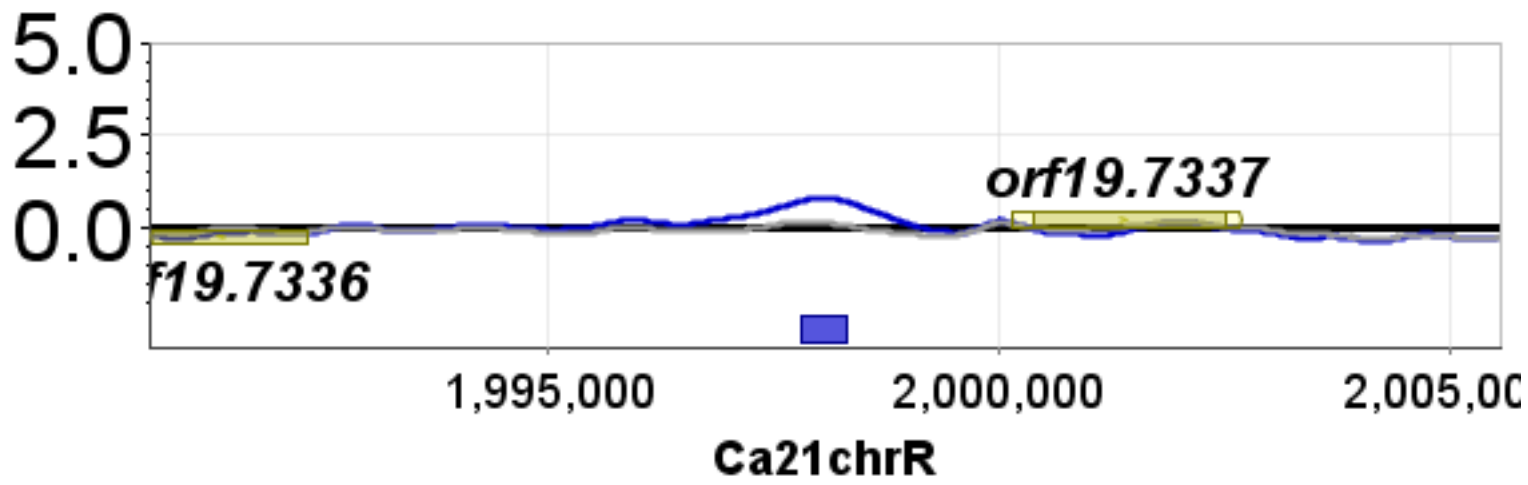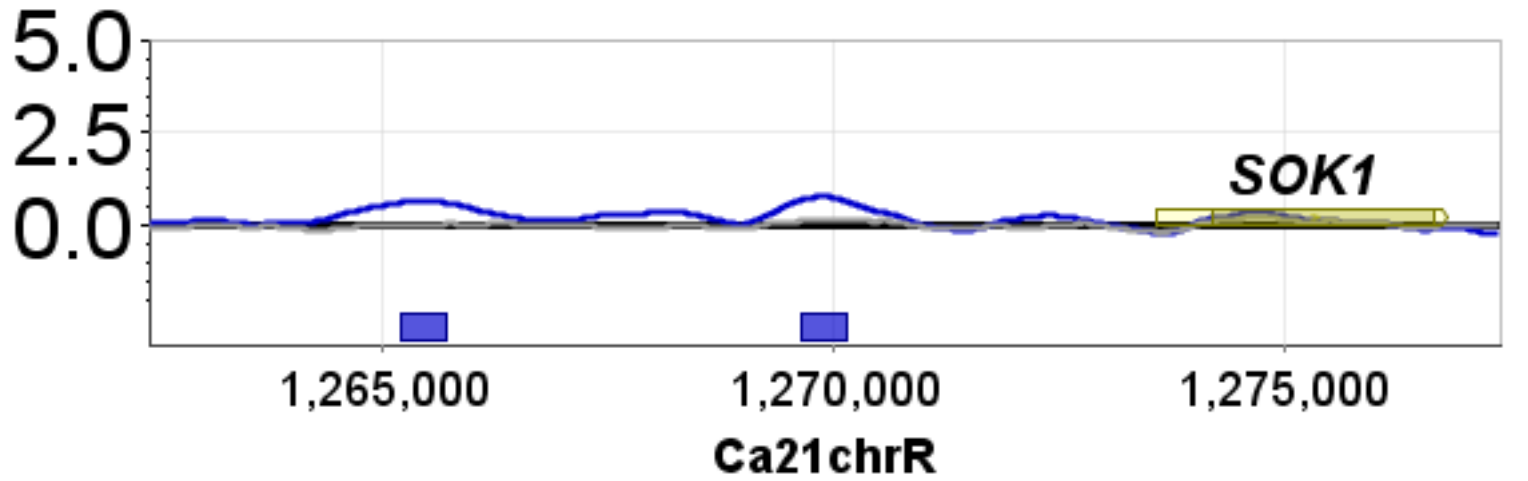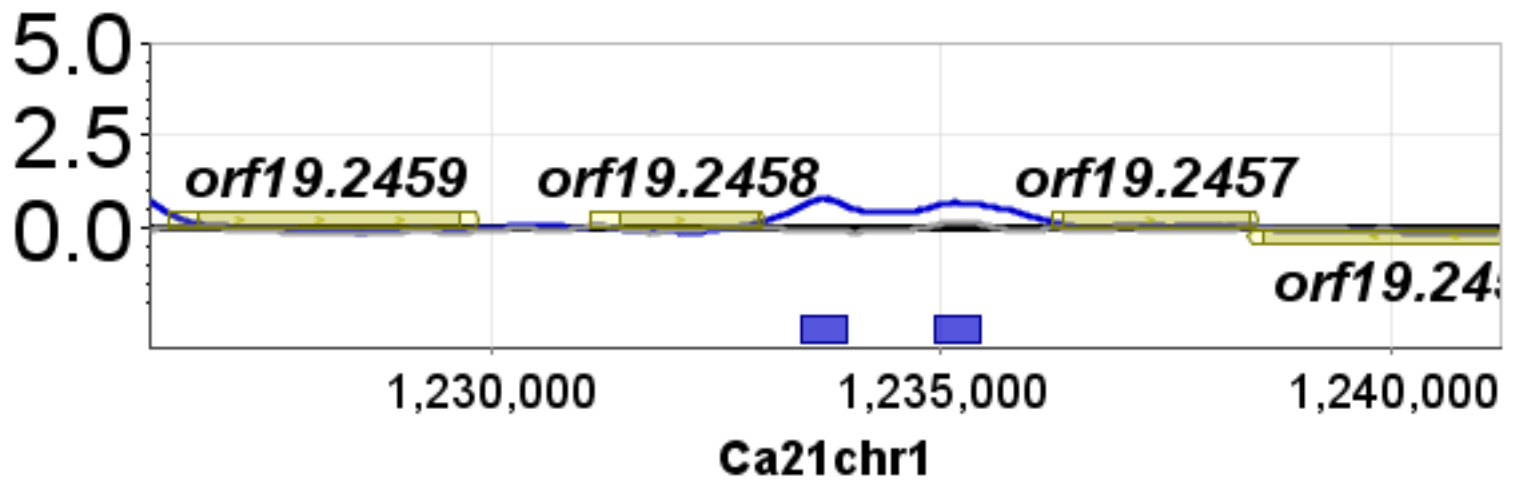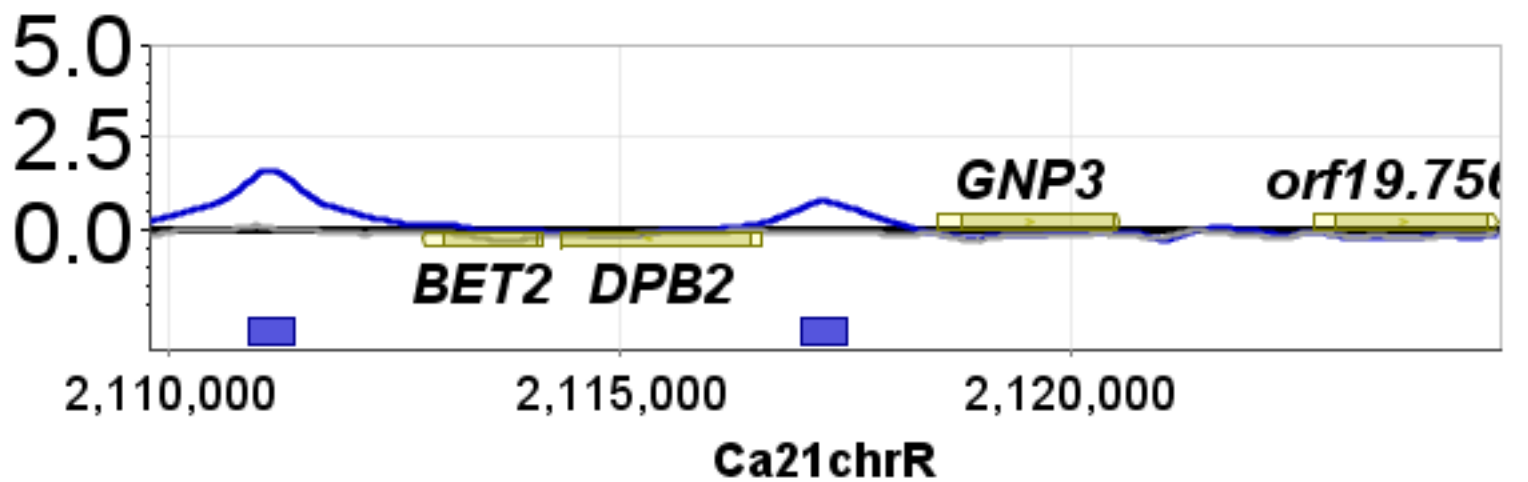



[0.767] Ca21chrR:1367097-1382096 [+] [BCR1, orf19.721, GST3, orf19.725]

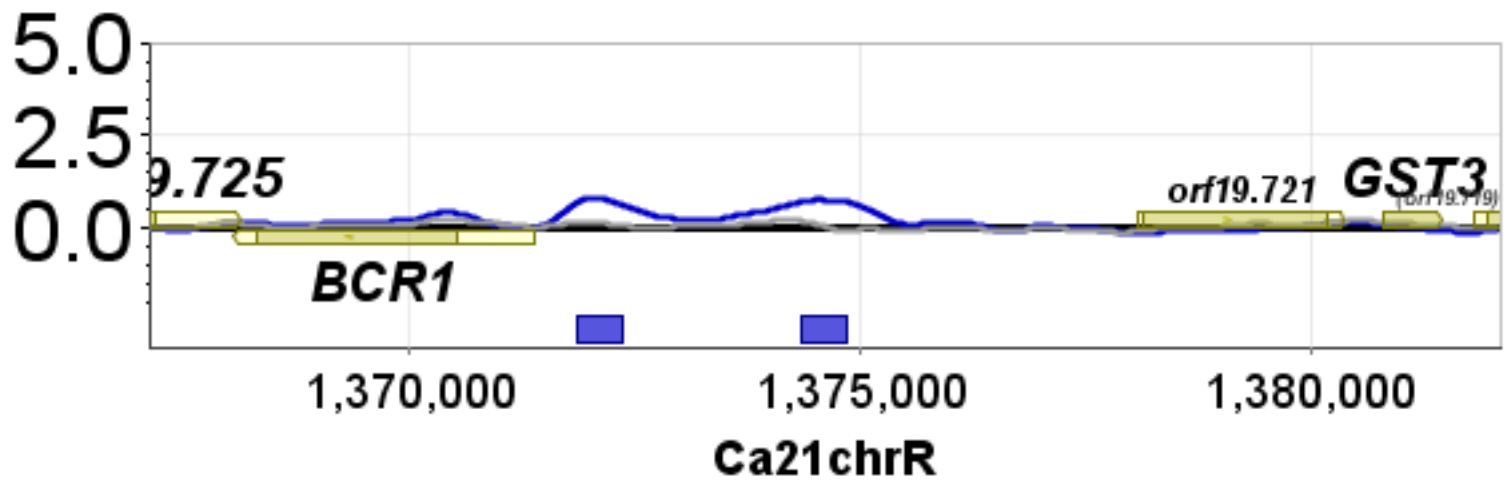

[0.742] Ca21chrR:874423-889422 [+] [ntar\_1253, ntar\_1254, ntar\_1255, HST7, ntar\_1256]

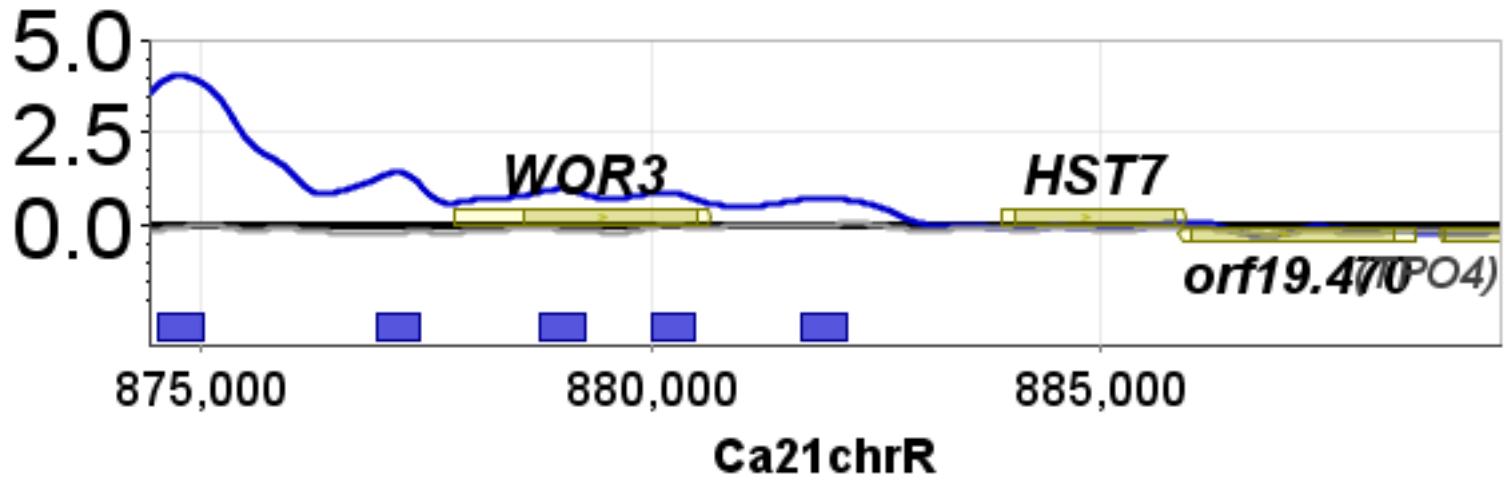

[0.734] Ca21chrR:1281385-1296384 [+] [orf19.3854, orf19.3852, CDC28, orf19.3858, ntar\_1295]

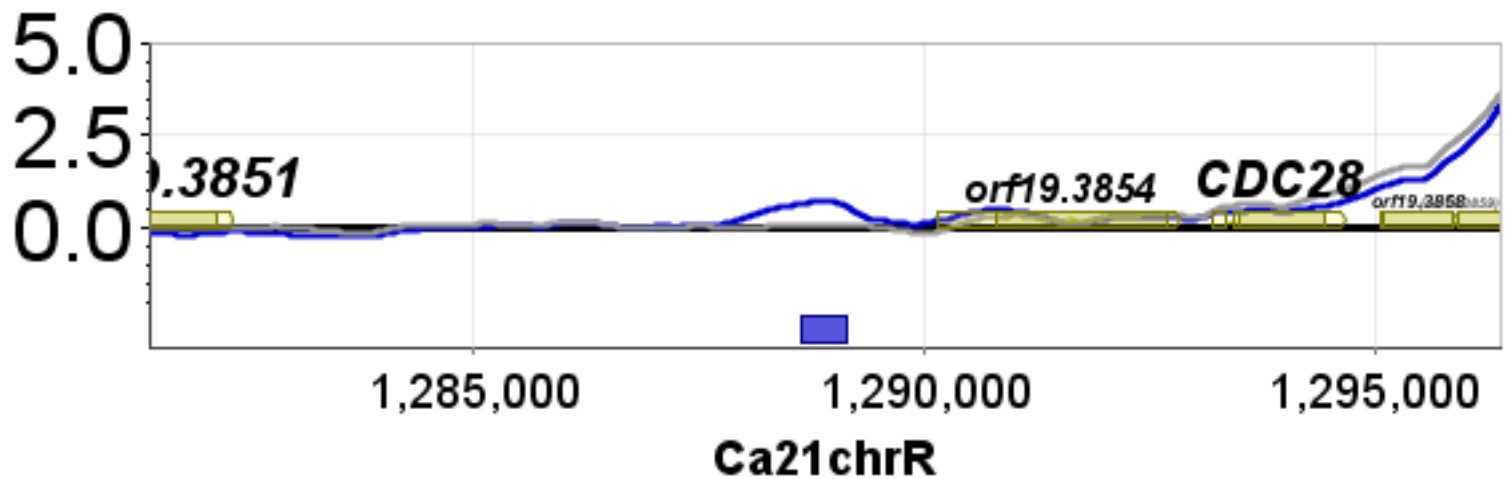

[0.73] Ca21chr4:281140-296139 [+] [ntar\_739, HAP3, UEC1, ntar\_740, BEM1]

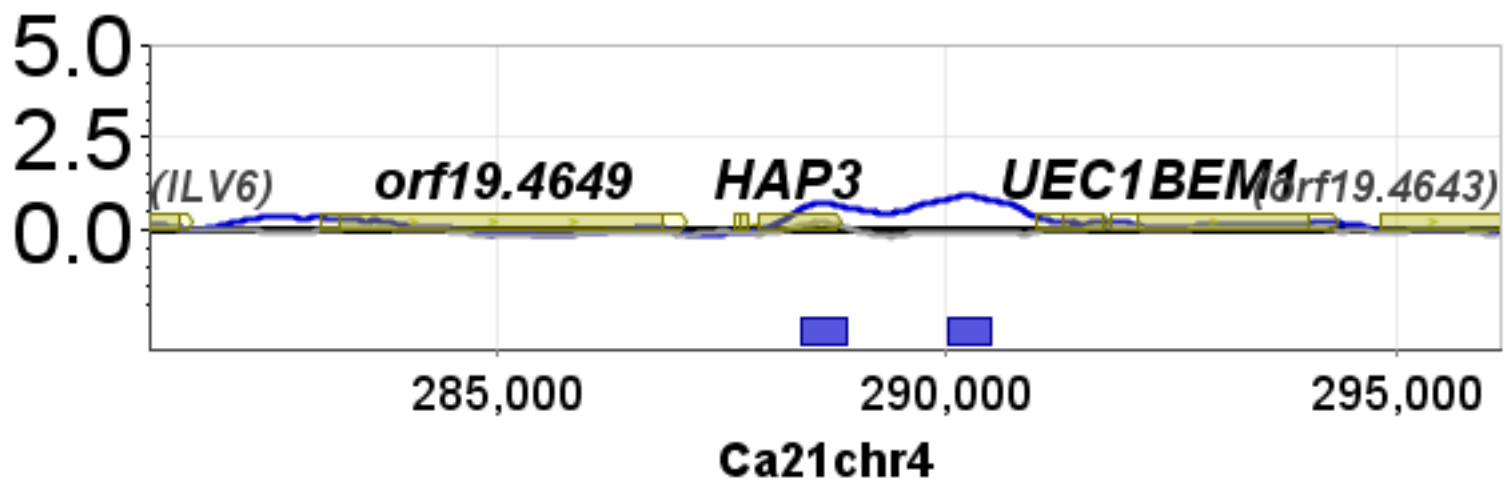

[0.729] Ca21chr2:156437-171436 [+] [HGT7, orf19.2024, ntar\_296, orf19.2025, orf19.2026]

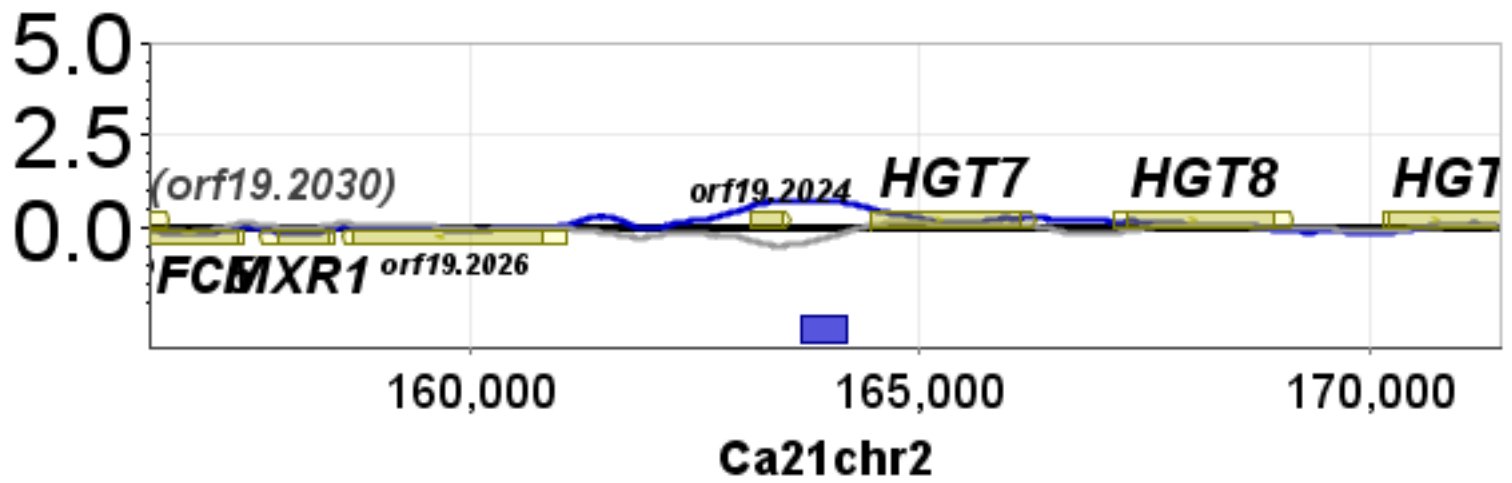

[0.723] Ca21chr1:1149676-1164675 [+] [Intar\_114, RPS27A, orf19.413, ntar\_115, orf19.414]

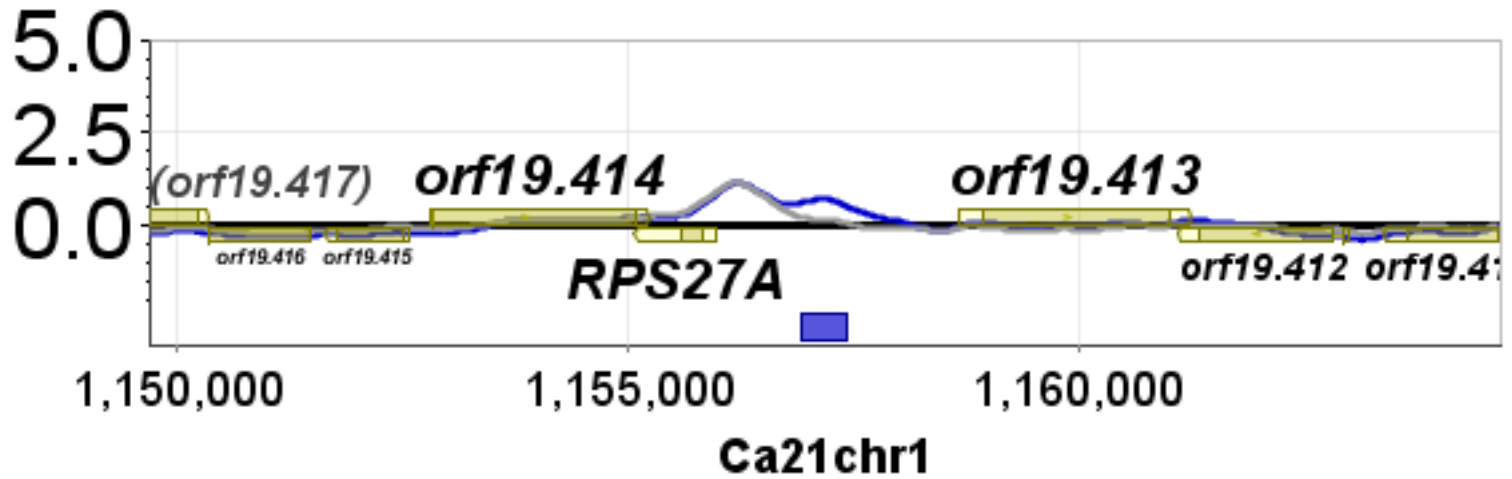

[0.722] Ca21chr3:1103226-1118225 [+] [ntar\_613, orf19.5991, orf19.5989]

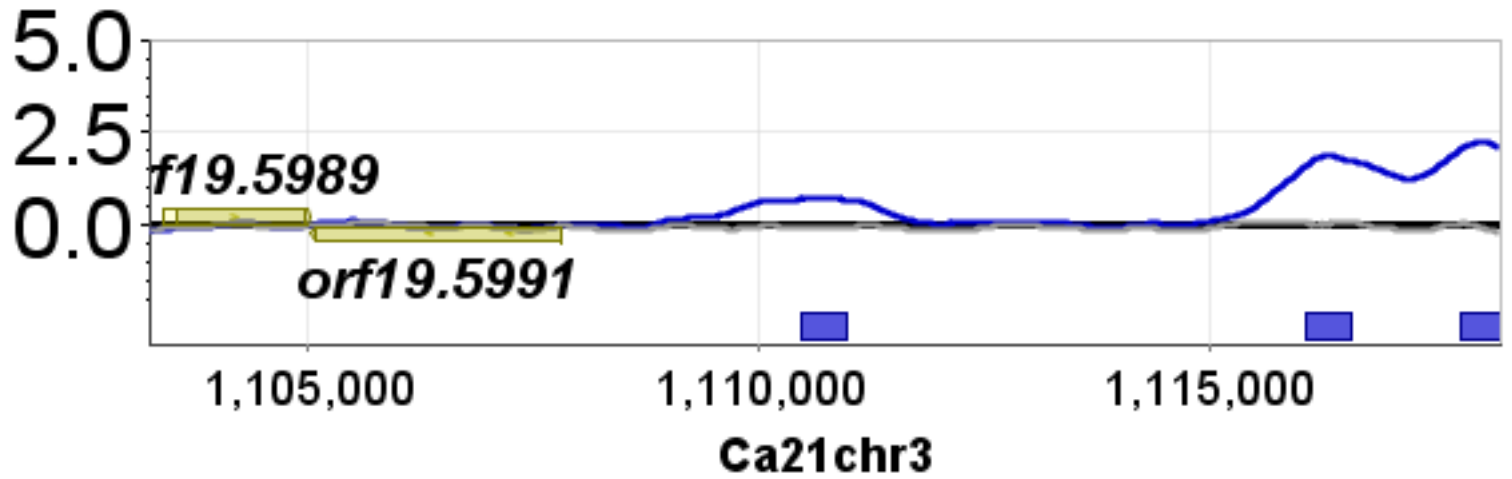

[0.72] Ca21chr5:816208-831207 [+] [orf19.1123, orf19.1124, ntar\_928, orf19.1122, ntar\_927]

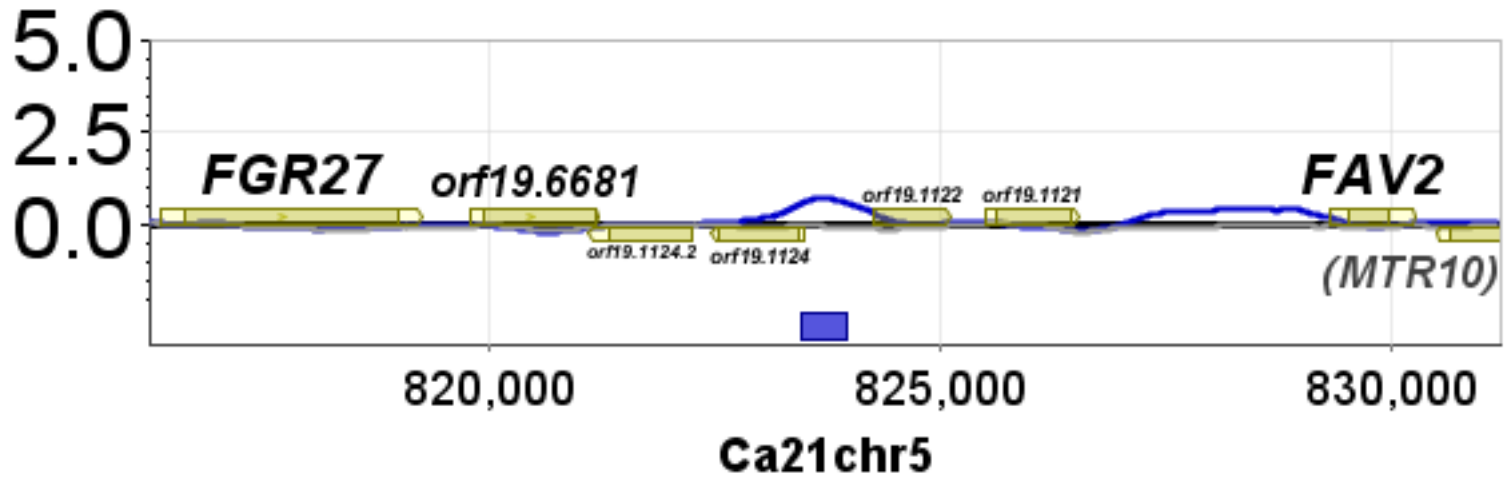

[0.716] Ca21chr1:2246326-2261325 [+] [ntar\_208, CLA4, TPK1, orf19.4889, orf19.4888]

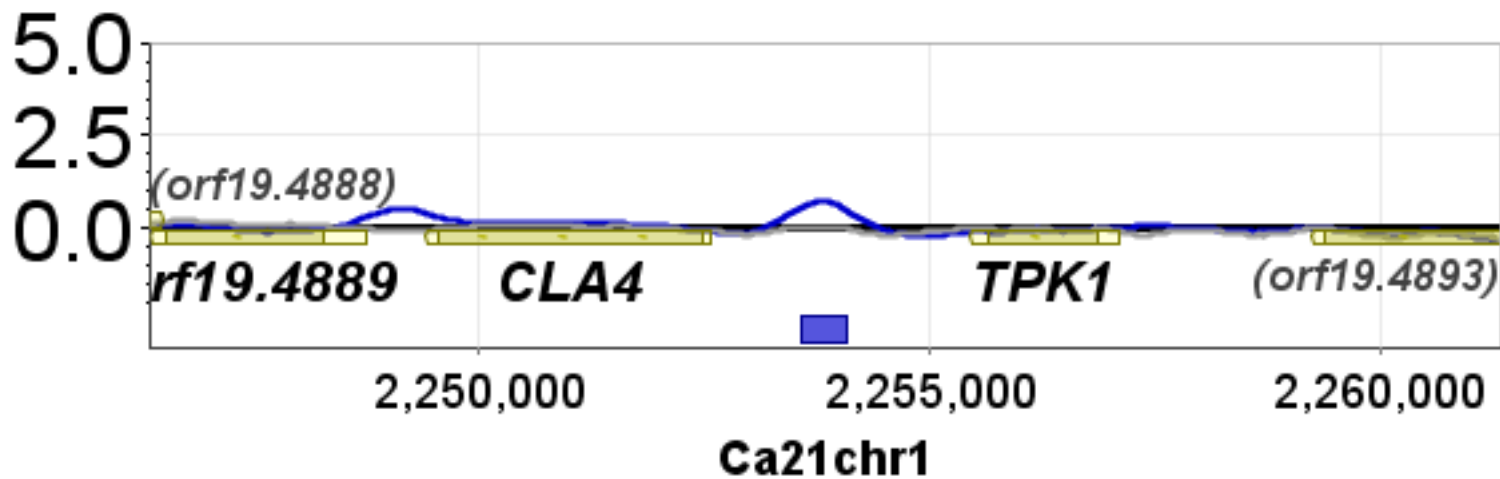

[0.714] Ca21chr4:1518736-1533735 [+] [CCT6, orf19.3125, CZF1, orf19.3124, orf19.3123.2]

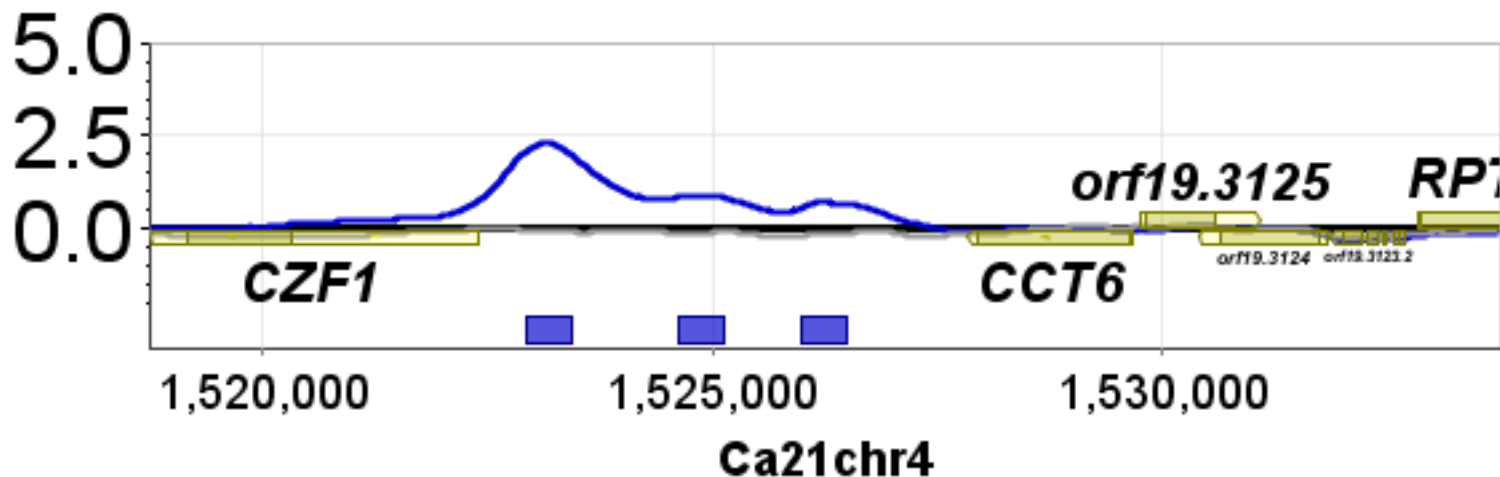

[0.707] Ca21chr2:773704-788703 [+] [orf19.850, orf19.851, orf19.849, SAP98, SAP99]

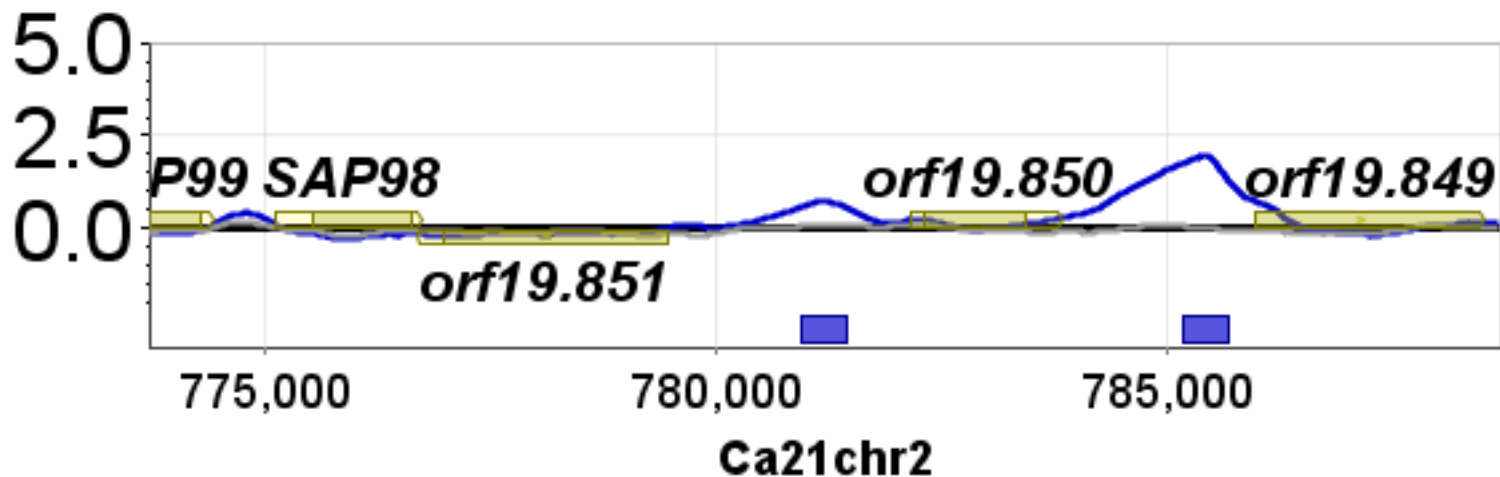

[0.707] Ca21chr3:120863-135862 [+] [ntar\_532, ntar\_531, ntar\_533, ntar\_534, PMA1]

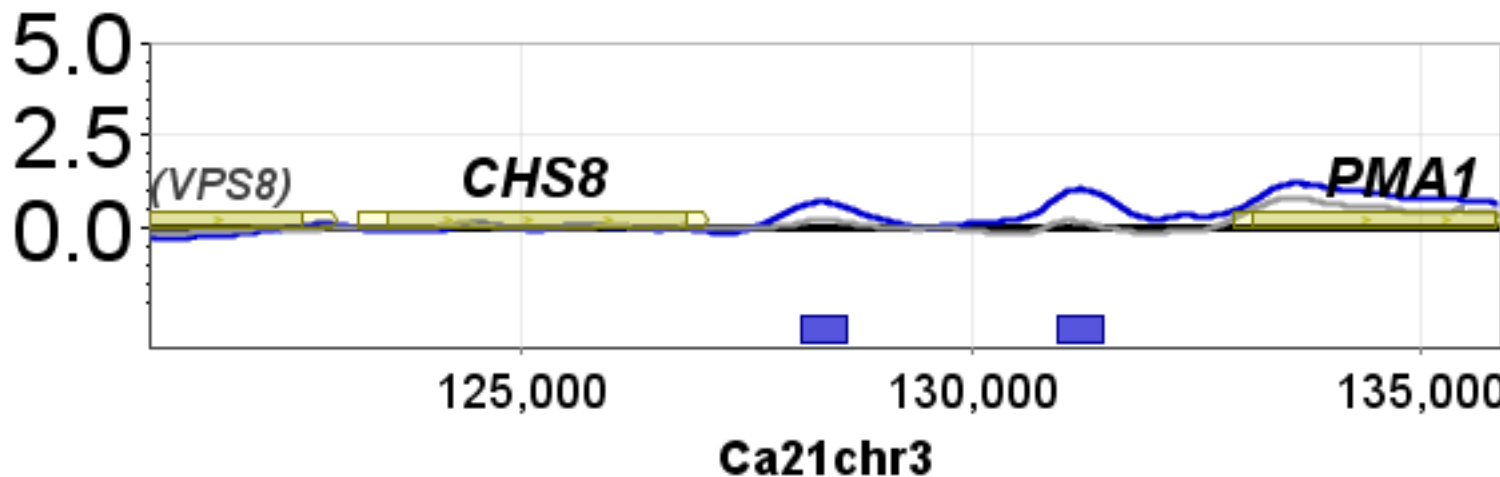

[0.704] Ca21chr1:810436-825435 [+] [orf19.4459, orf19.4461, ntar\_81, ntar\_80, orf19.4463]

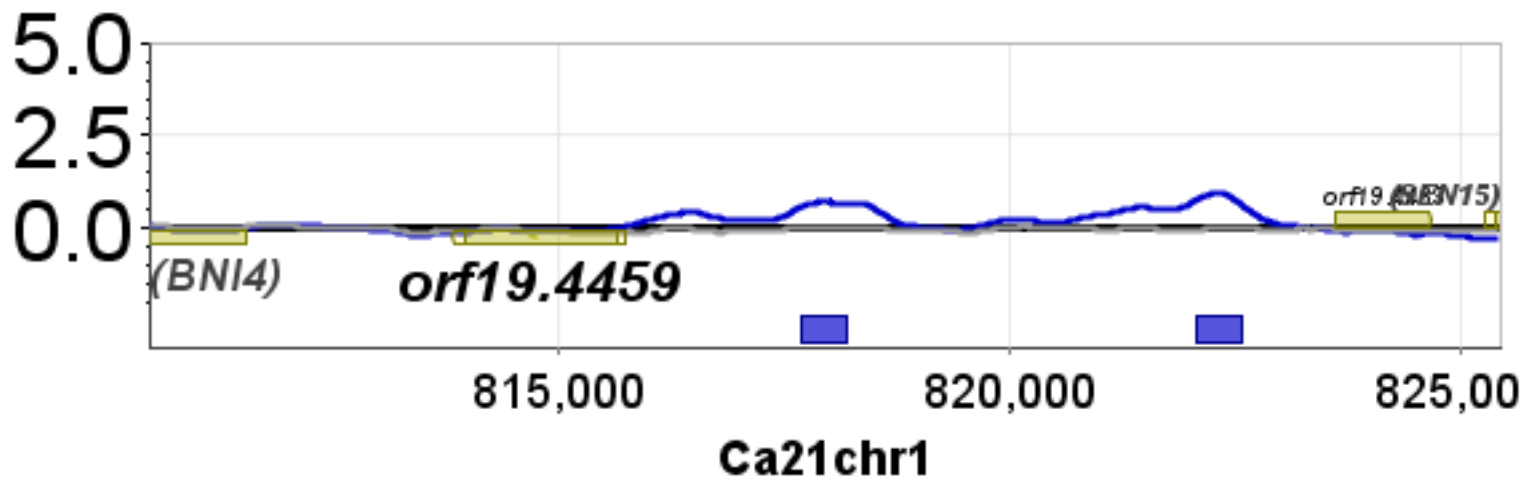

[0.704] Ca21chr5:918726-933725 [+] [ntar\_941, orf19.3898, SDC1, orf19.3897, orf19.3900]

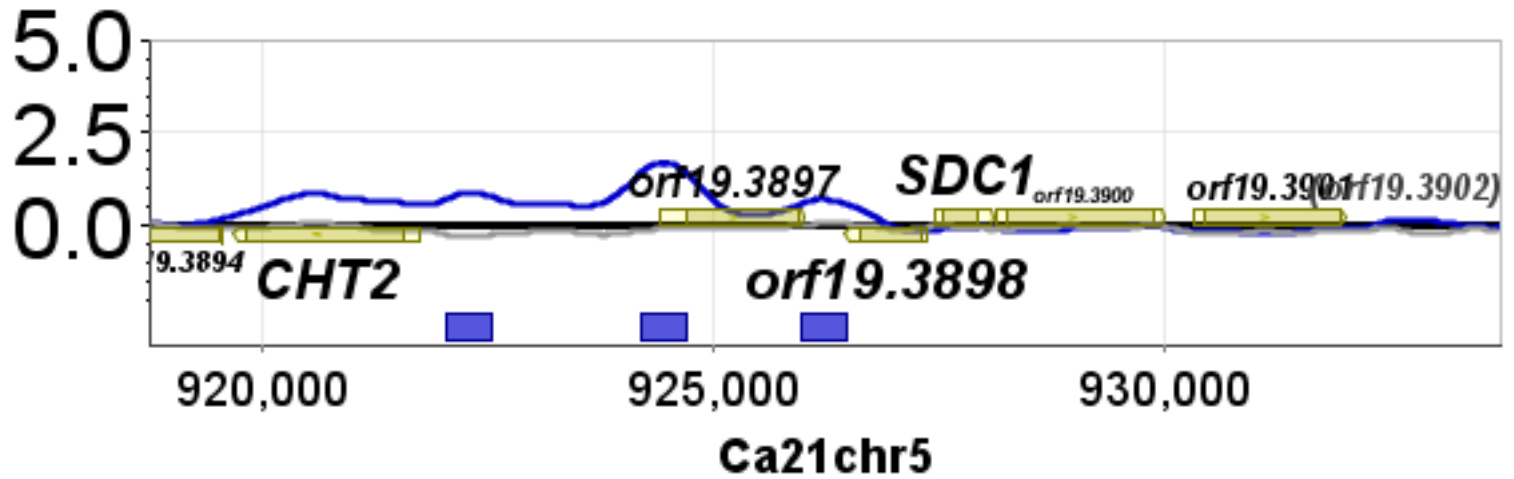

[0.698] Ca21chrR:596649-611648 [+] [ntar\_1219, ntar\_1220, RFG1, orf19.2825, ntar\_1222]

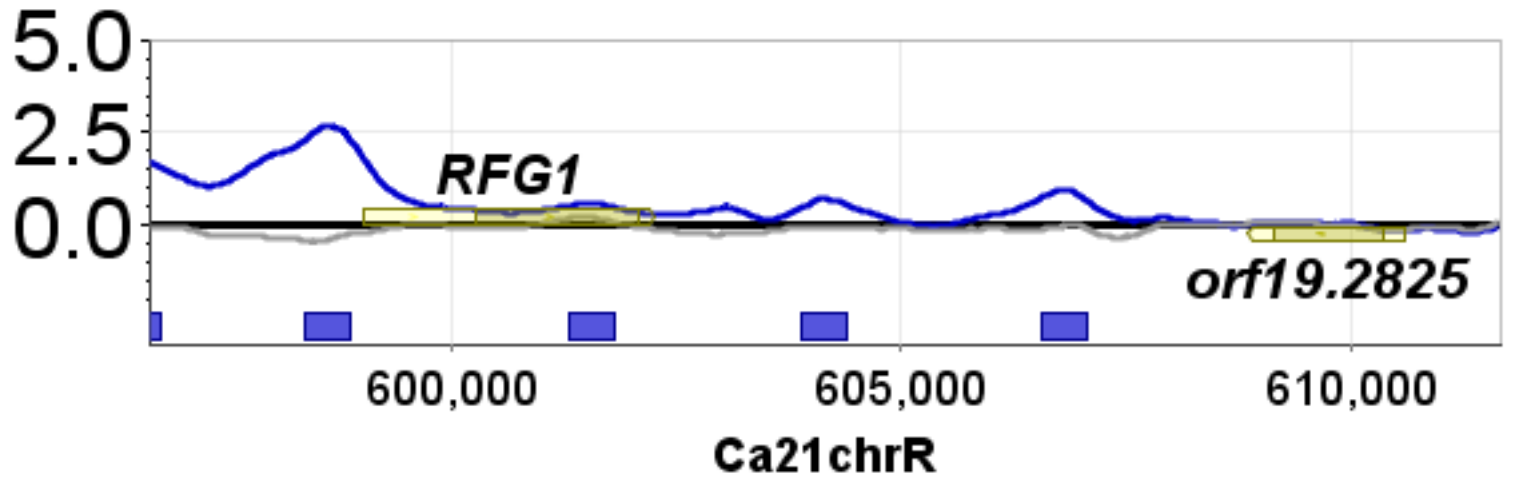

[0.696] Ca21chr5:116699-131698 [+] [ntar\_855, orf19.932, orf19.933, orf19.934, orf19.931]

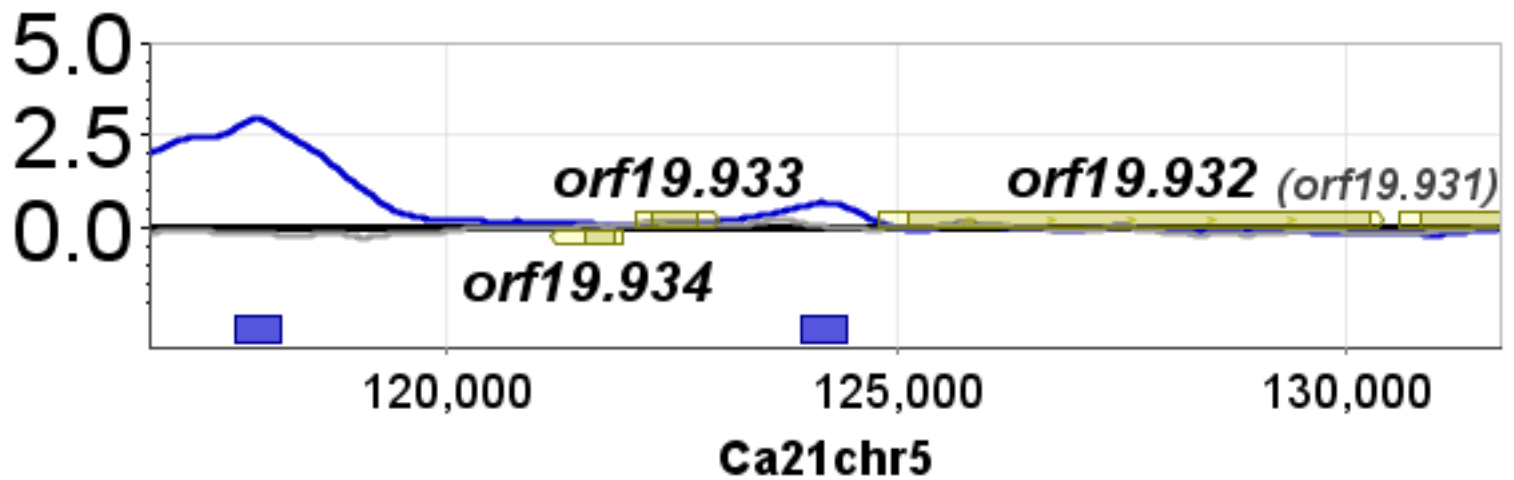

[0.694] Ca21chr3:965518-980517 [+] [orf19.5917.3, STP3, orf19.5918, MEA1, orf19.5915]

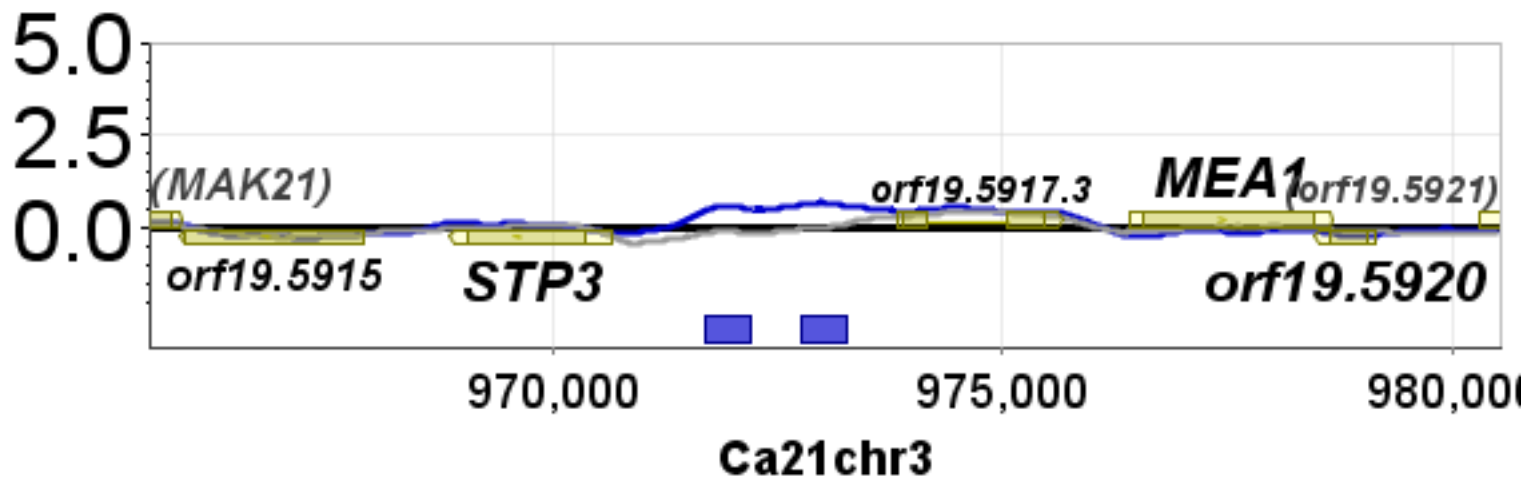

[0.694] Ca21chrR:1697015-1712014 [+] [orf19.3713, orf19.3712, orf19.3714, orf19.3711, ASF1]

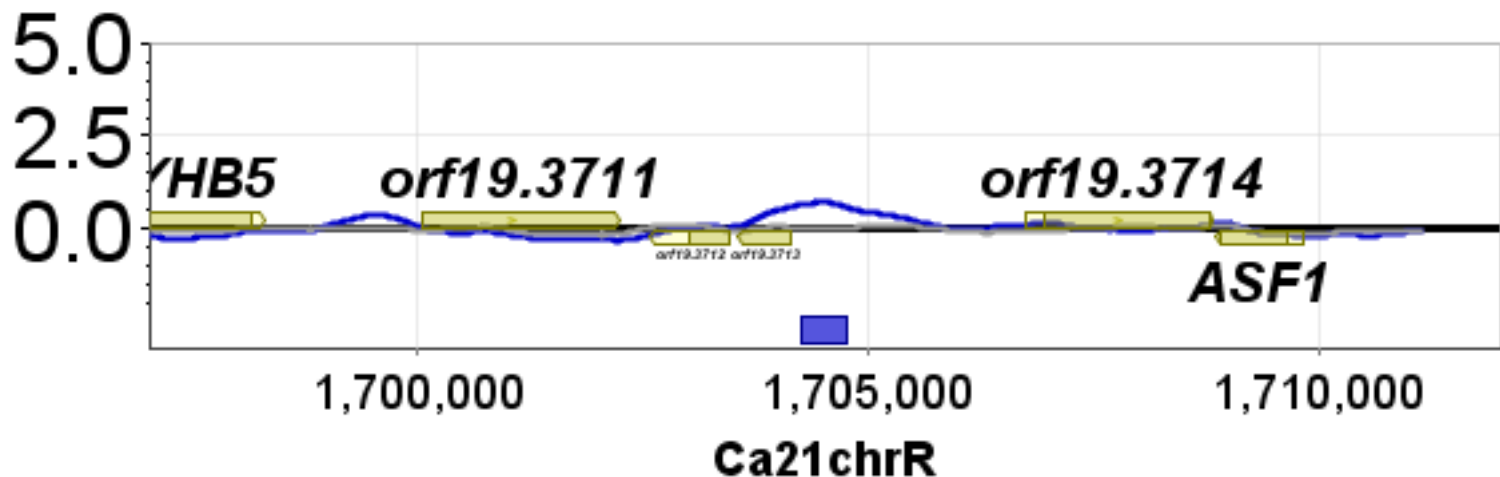

[0.686] Ca21chr5:725758-740757 [+] [RMS1, BUB3, orf19.2657, orf19.2653]

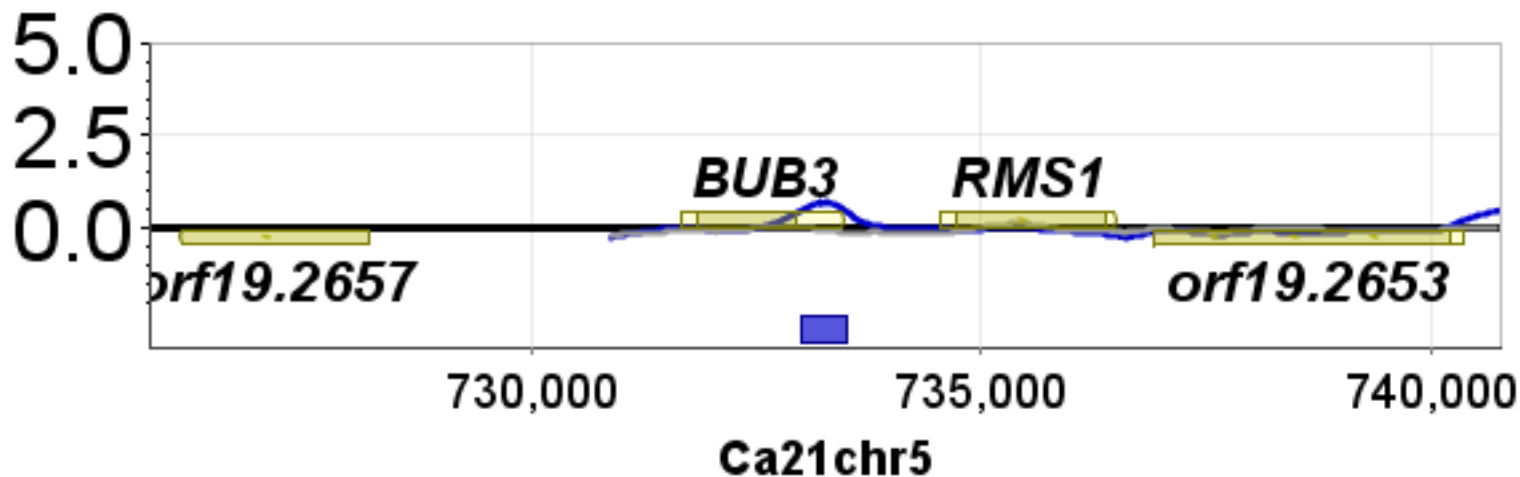

[0.683] Ca21chr1:1227691-1242690 [+] [orf19.2457, orf19.2458, orf19.2455, orf19.2459]

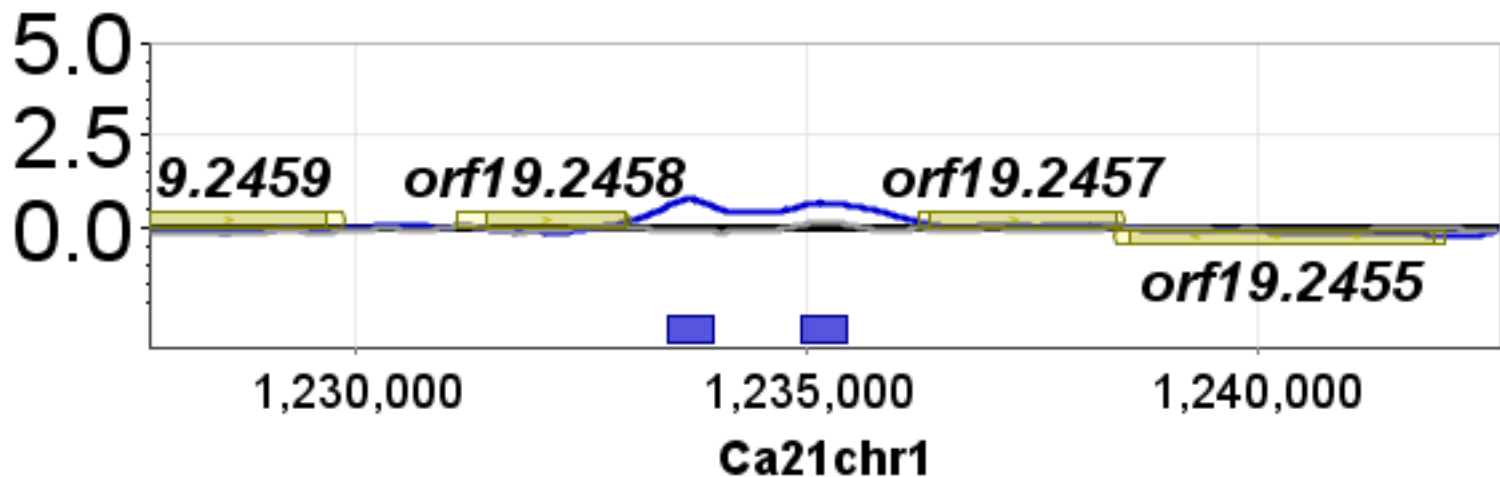

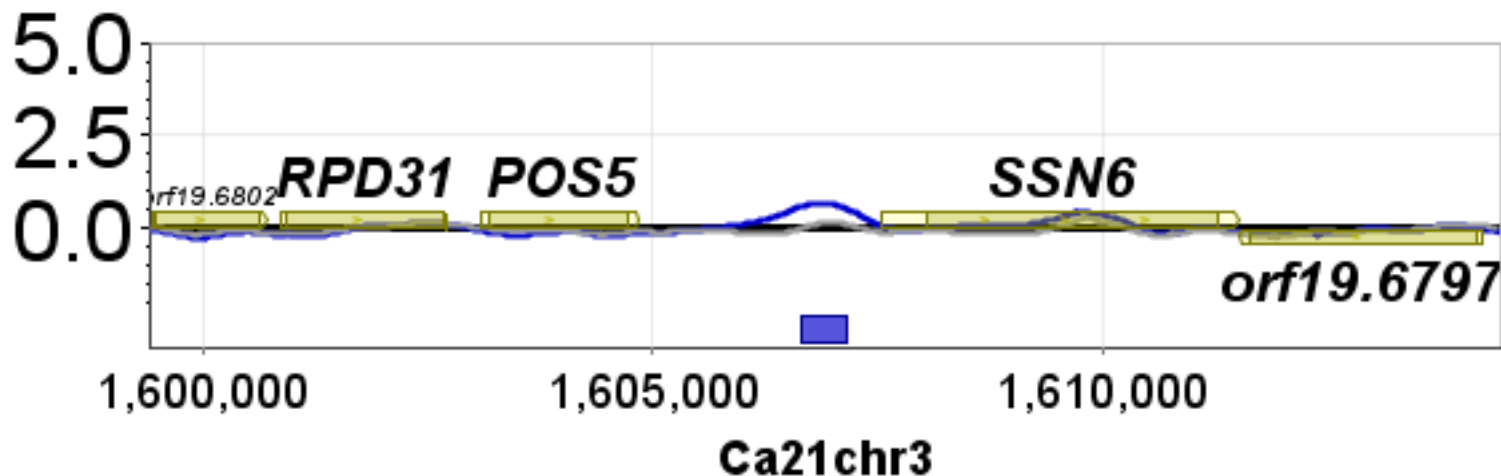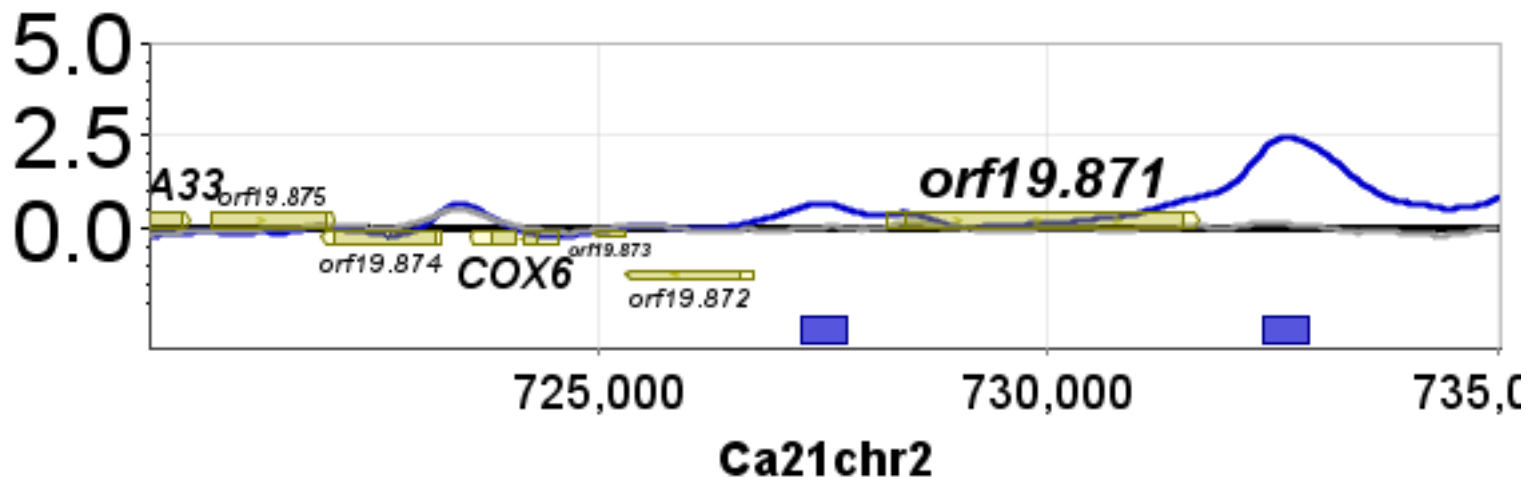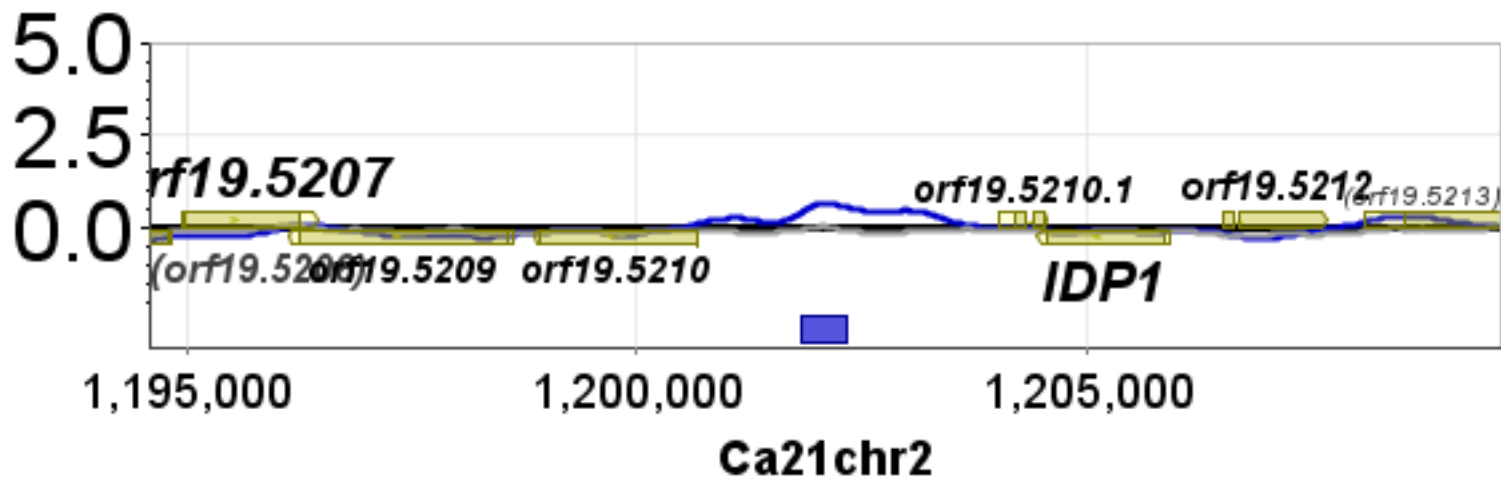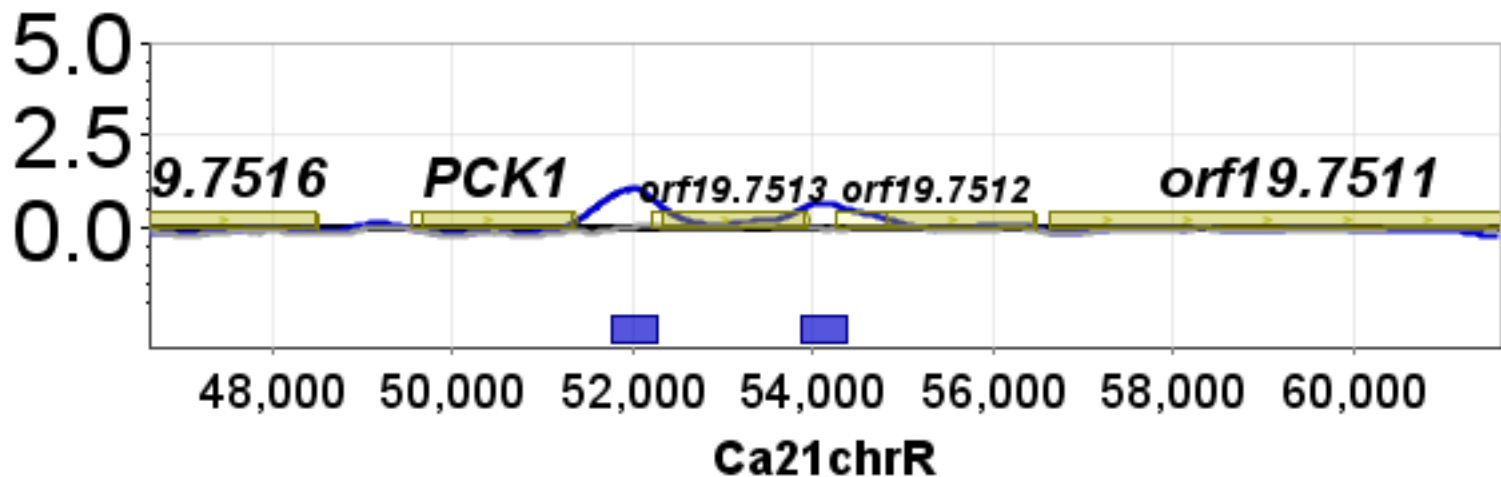

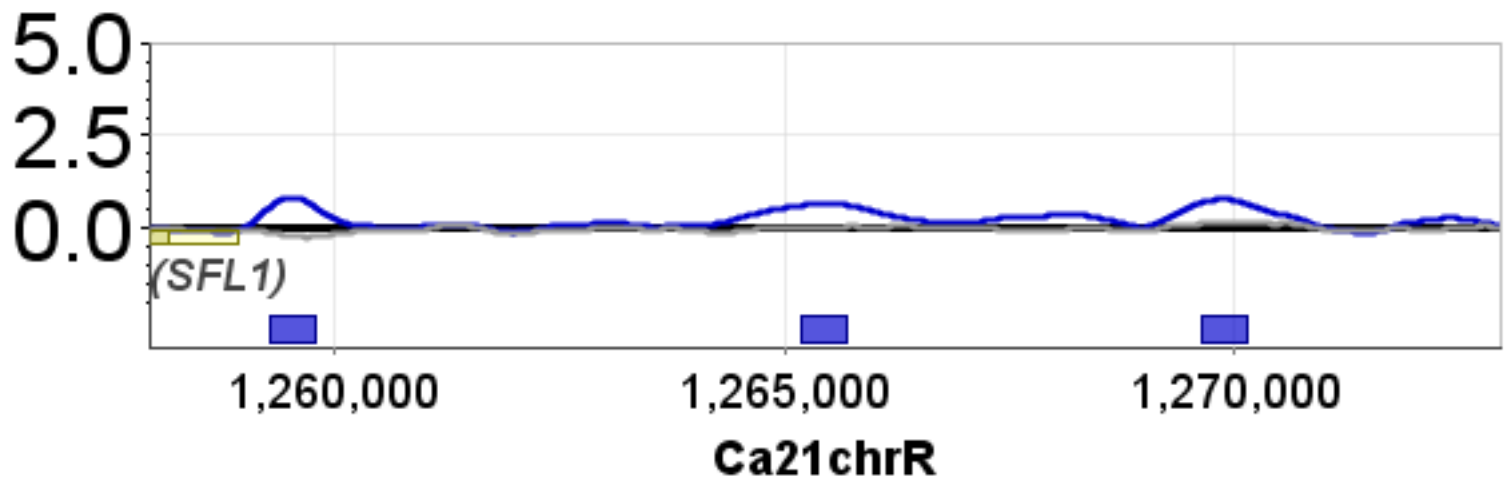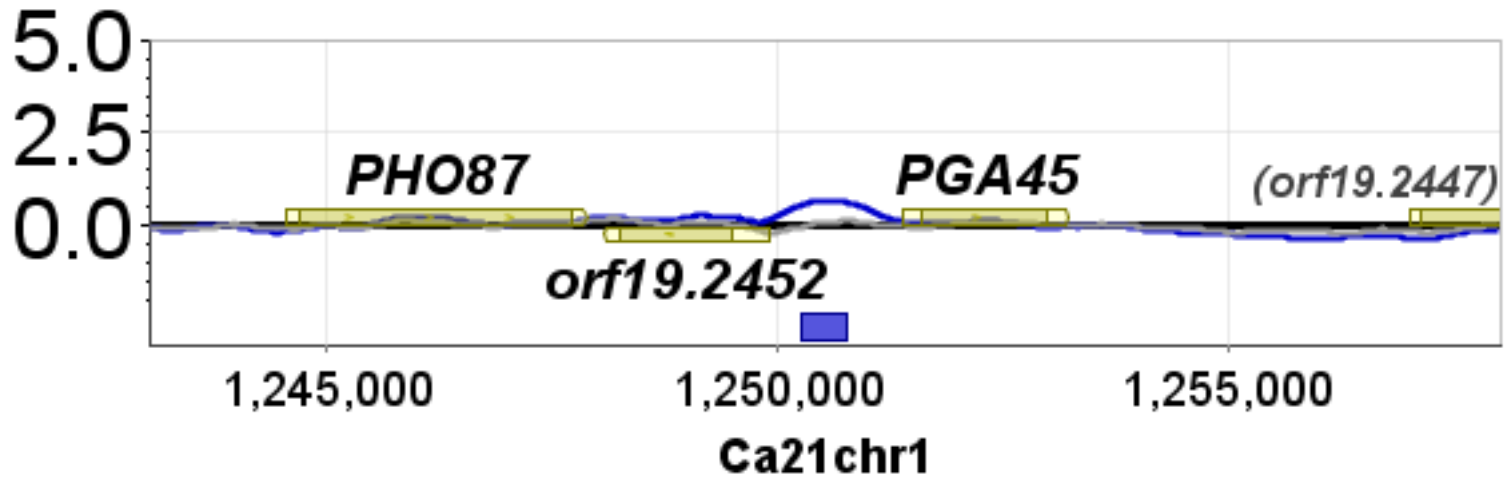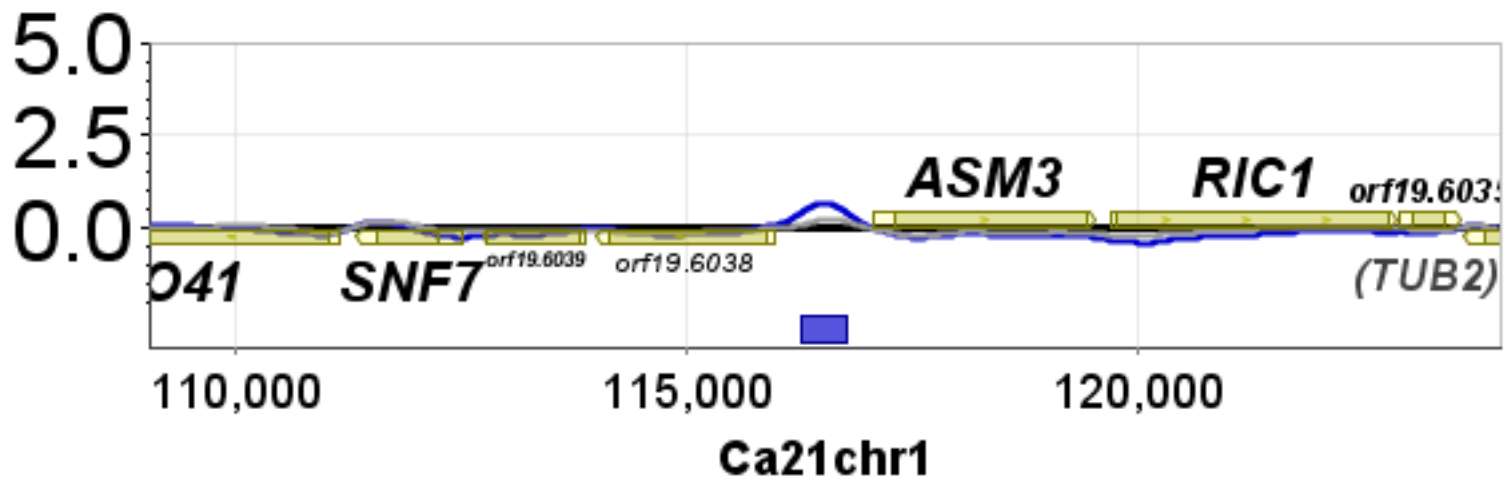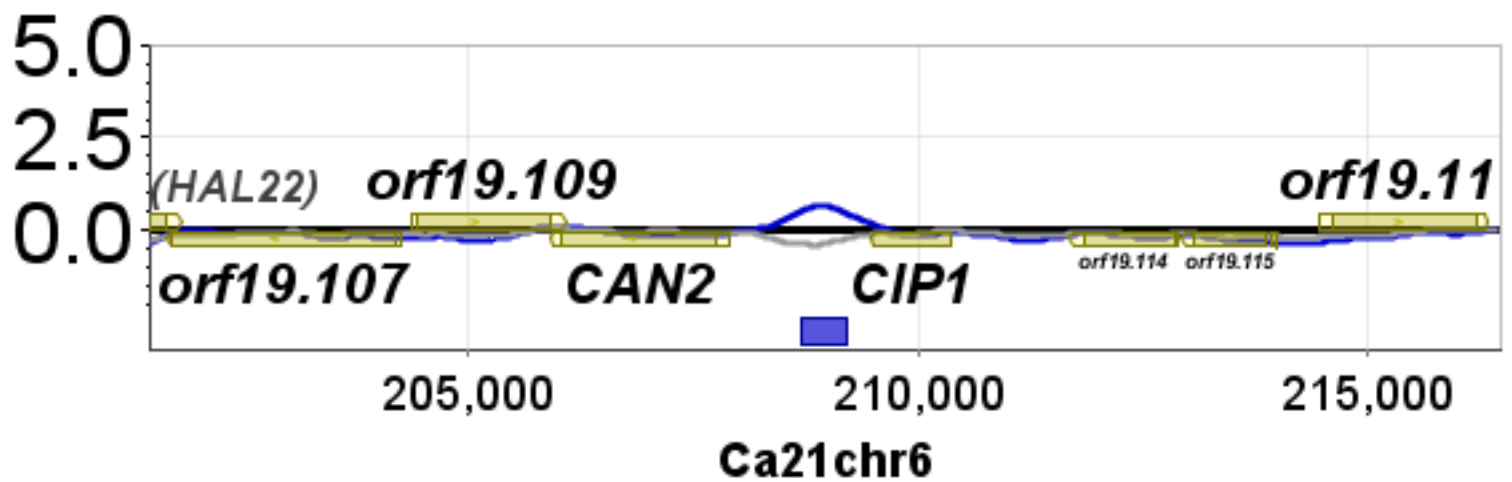

[0.652] Ca21chr3:1207018-1222017 [+] [ntar\_632, orf19.6983, orf19.6982, orf19.6981, orf19.6980]

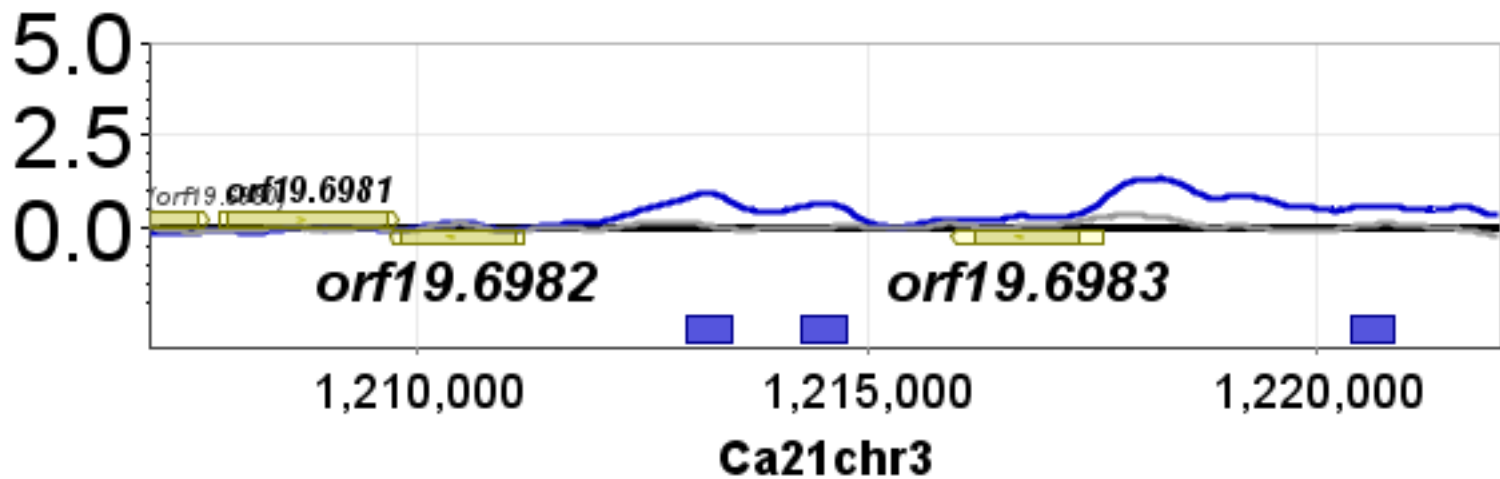

[0.642] Ca21chr5:859994-874993 [+] [orf19.3216, orf19.3218, ntar\_932, orf19.3215, ntar\_931]

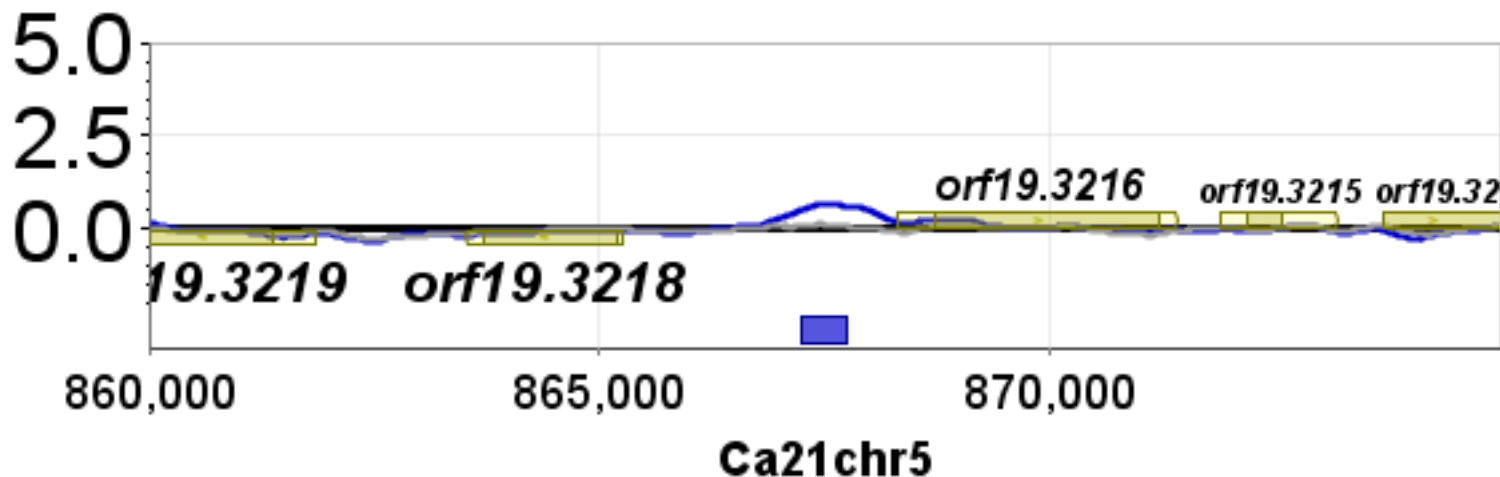

[0.641] Ca21chr1:431079-446078 [+] [HGT2, ntar\_41, ntar\_40, SHA3, orf19.3667]

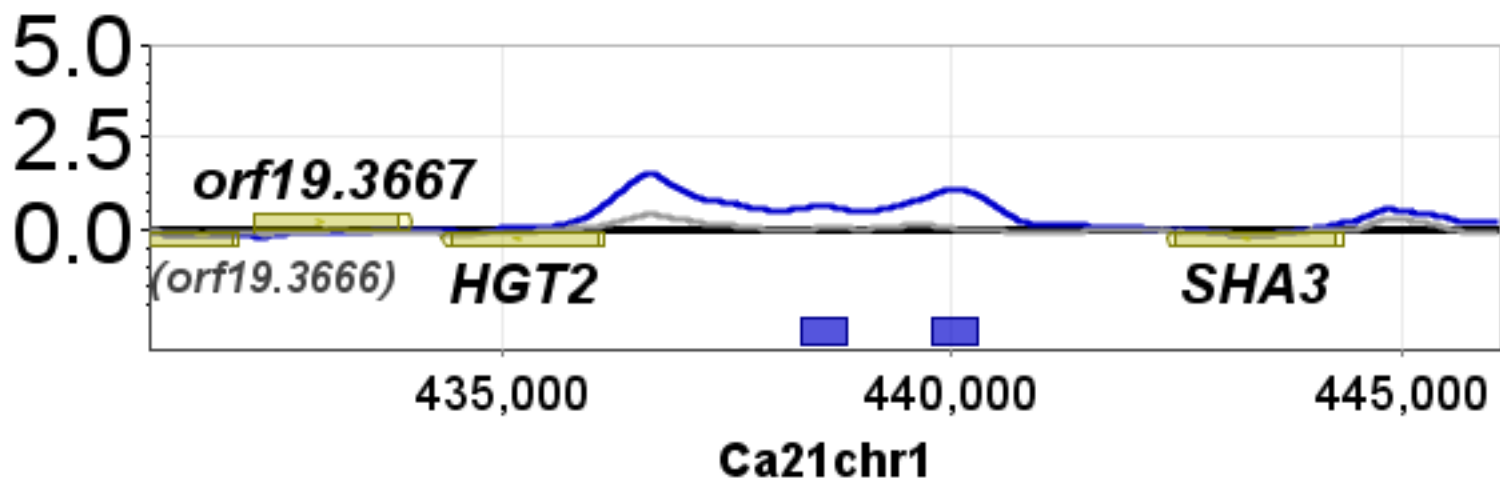

[0.641] Ca21chr1:3063868-3078867 [+] [ntar\_277, SIM1, SSK1, orf19.5033, orf19.5034]

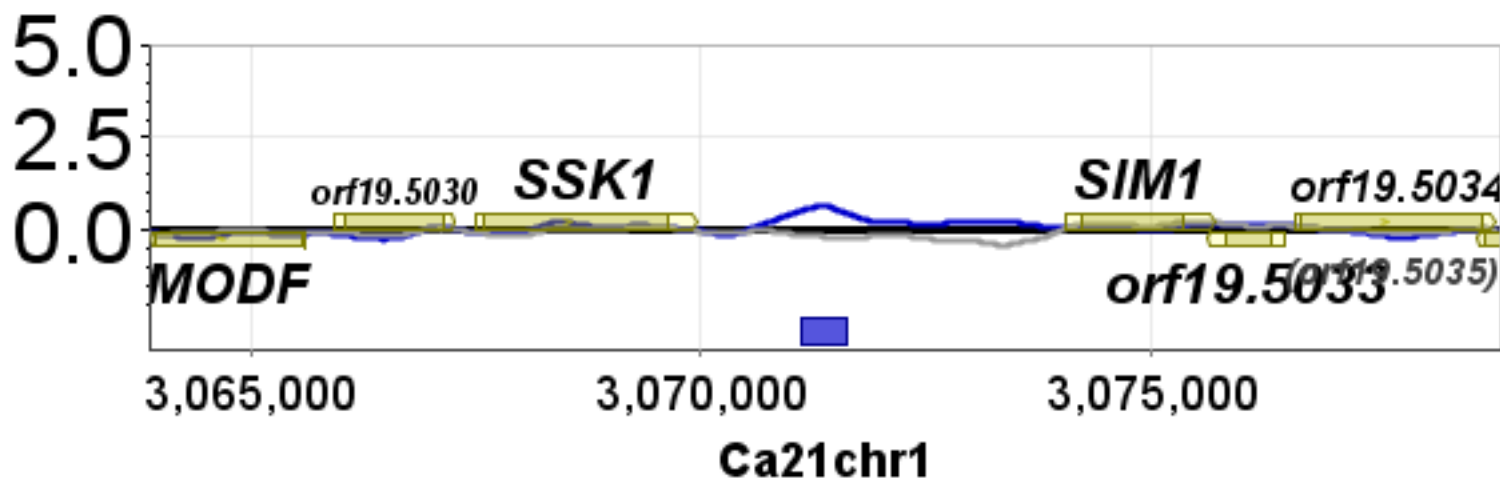



[0.64] Ca21chr4:835409-850408 [+] [ntar\_788, ntar\_789, PYC2, orf19.787, orf19.787.1]

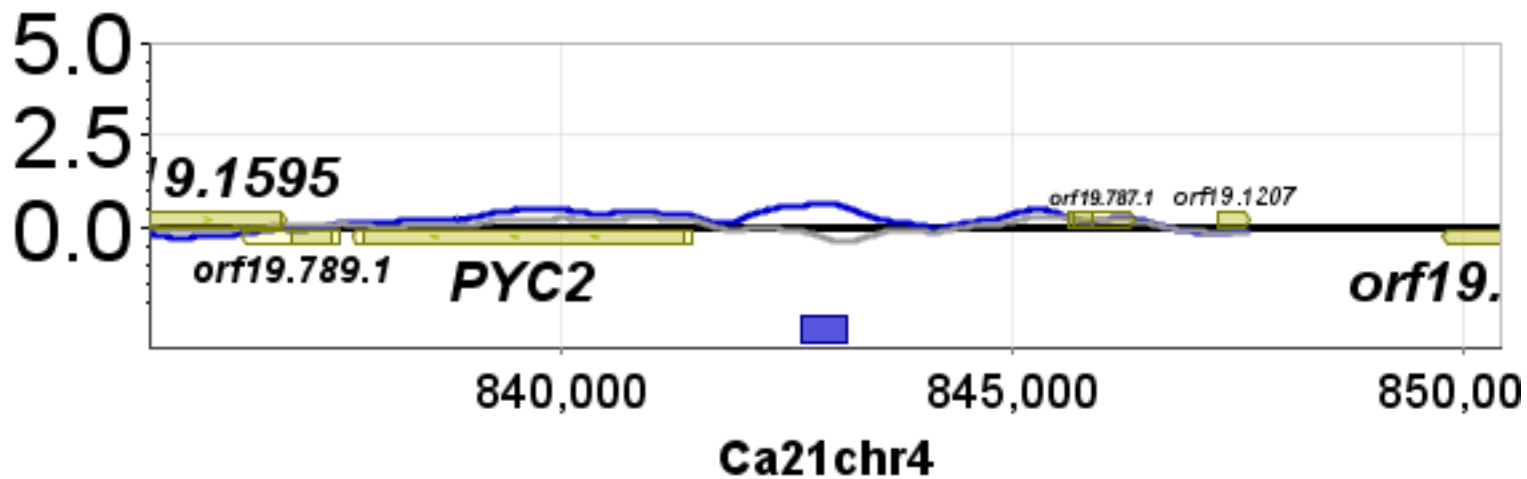

[0.632] Ca21chr1:705209-720208 [+] [EHT1, ntar\_74, orf19.3041, TPS2, ntar\_73]

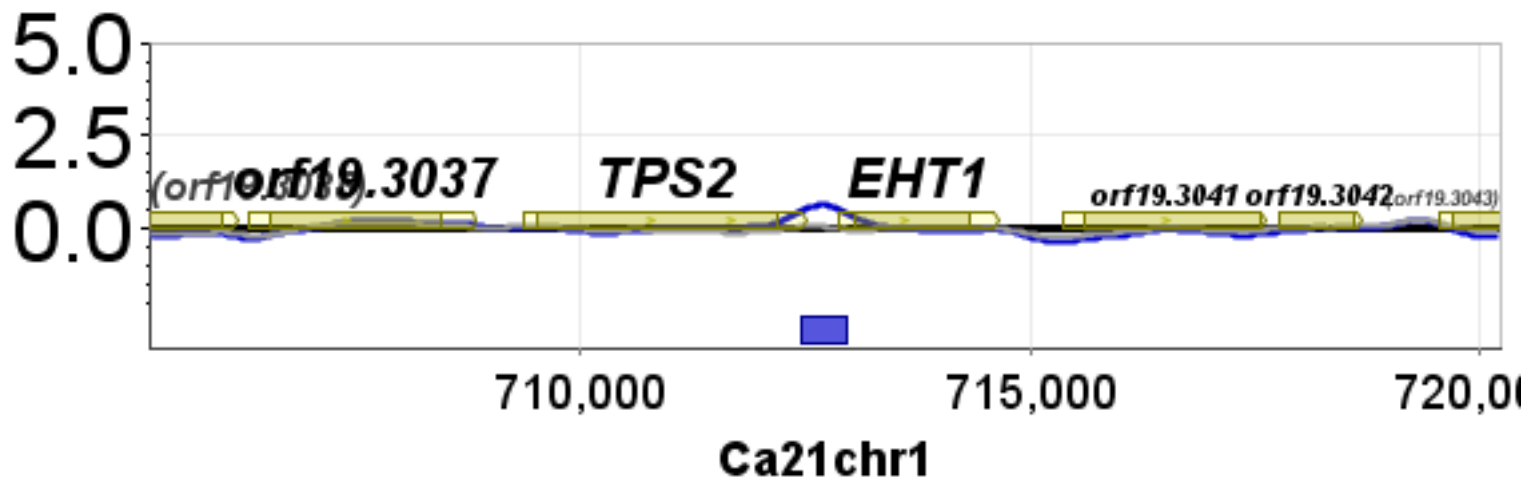

[0.631] Ca21chr5:92881-107880 [+] [orf19.938, orf19.937, orf19.936, NAM7, ntar\_853]

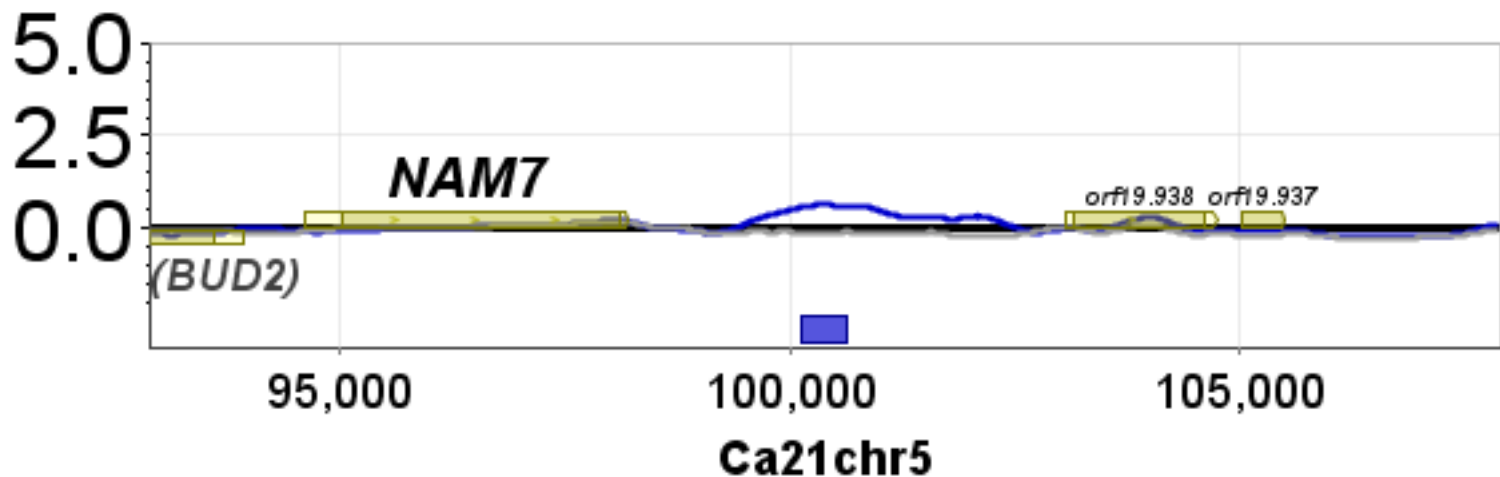

[0.621] Ca21chr5:701059-716058 [+] [ntar\_915, orf19.4347, ntar\_914, orf19.4346, ntar\_916]

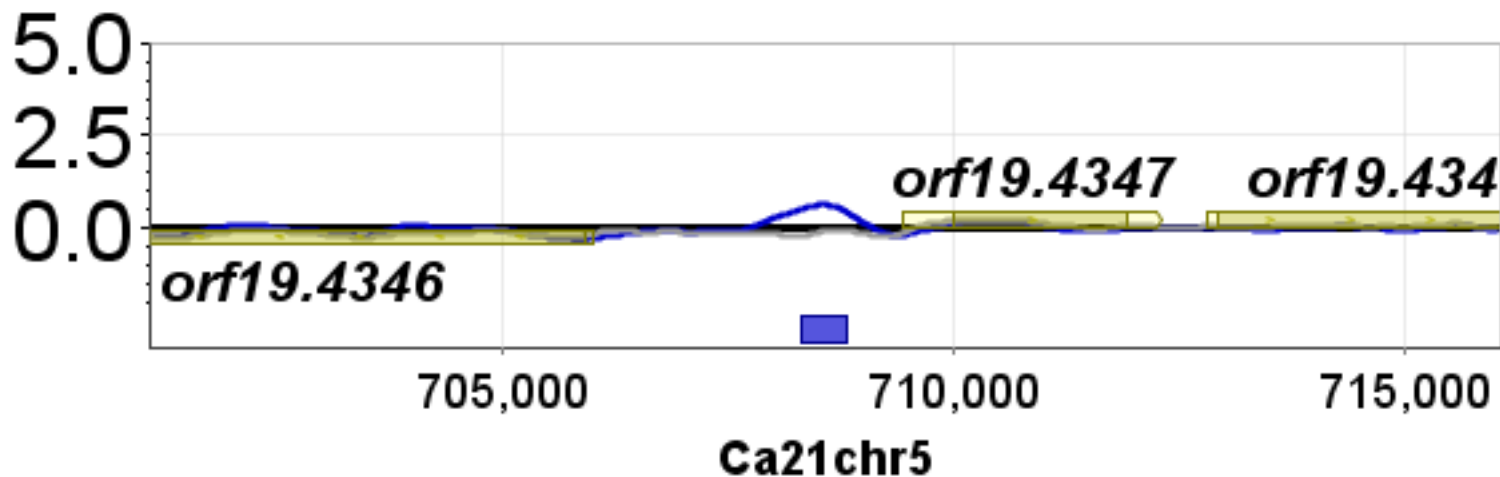

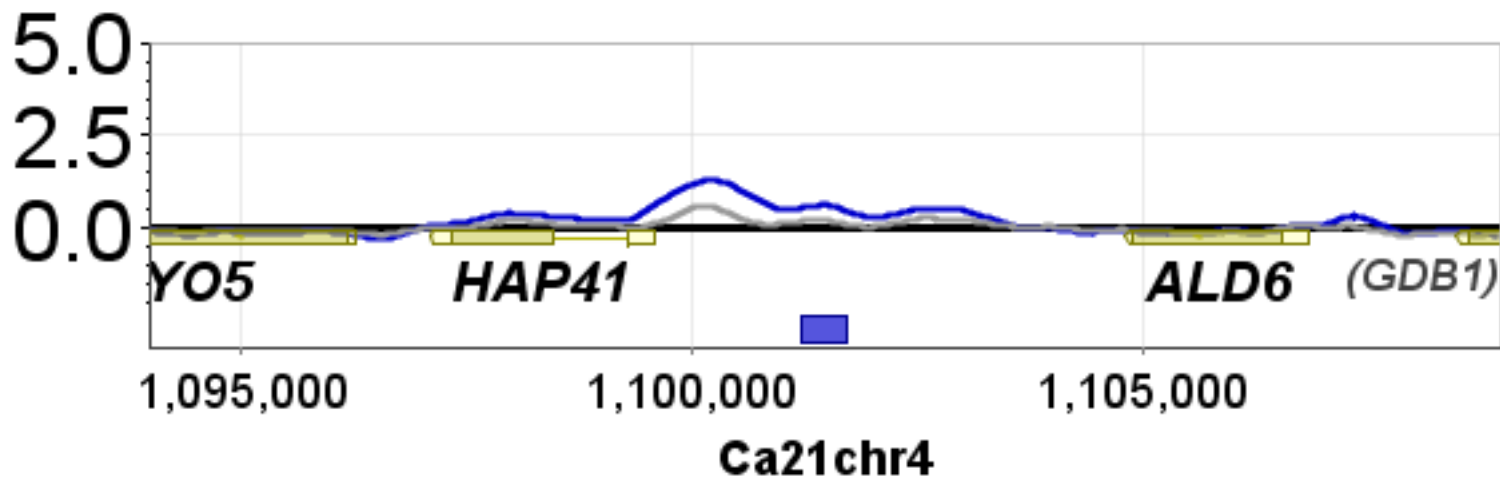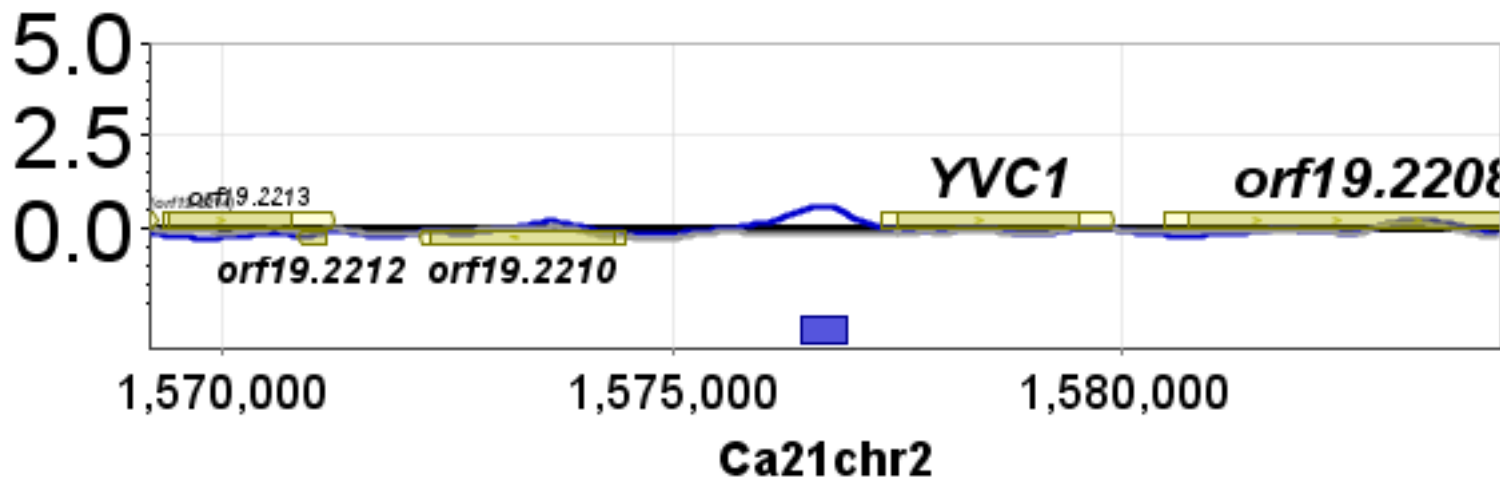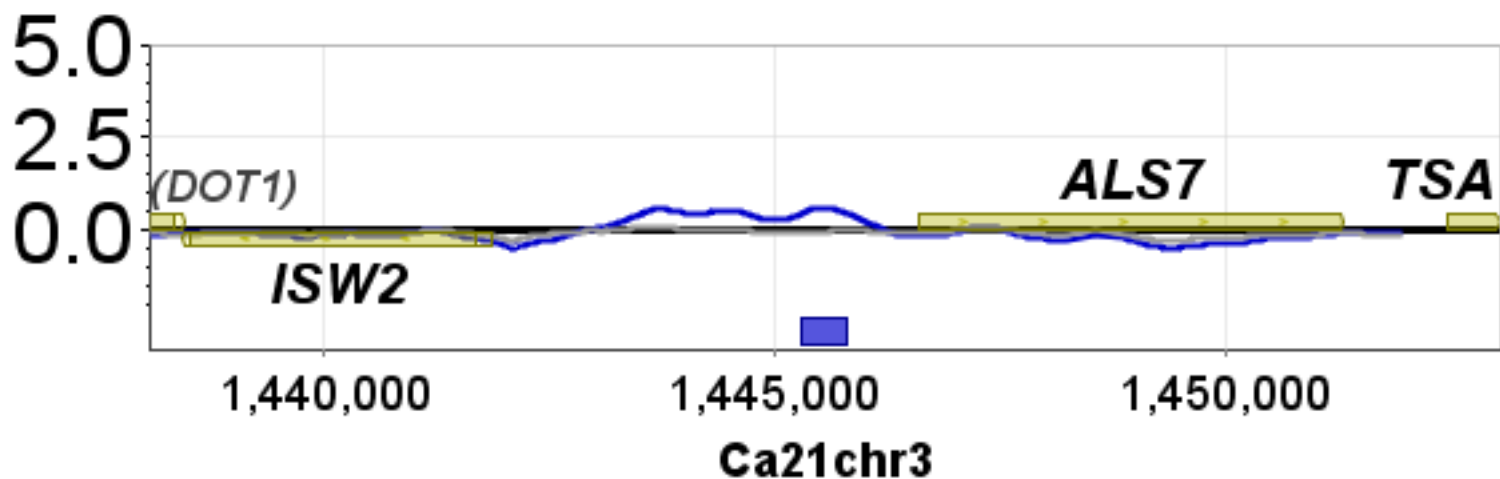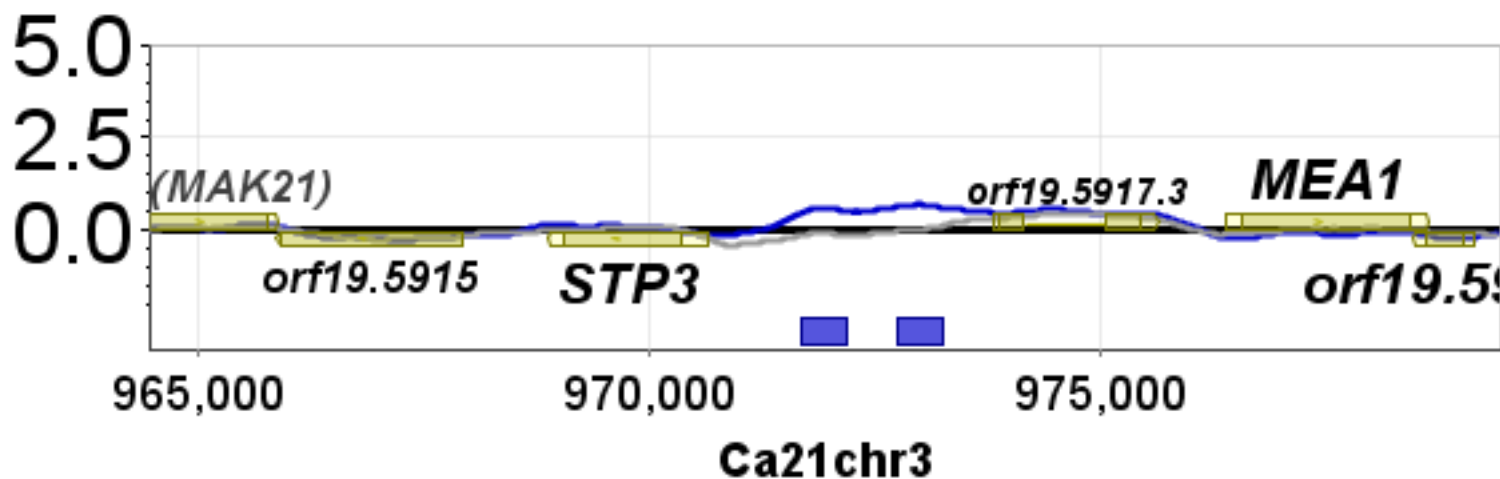

[0.601] Ca21chrR:887138-902137 [+] [orf19.475, orf19.474, orf19.477, TPO4, orf19.478]

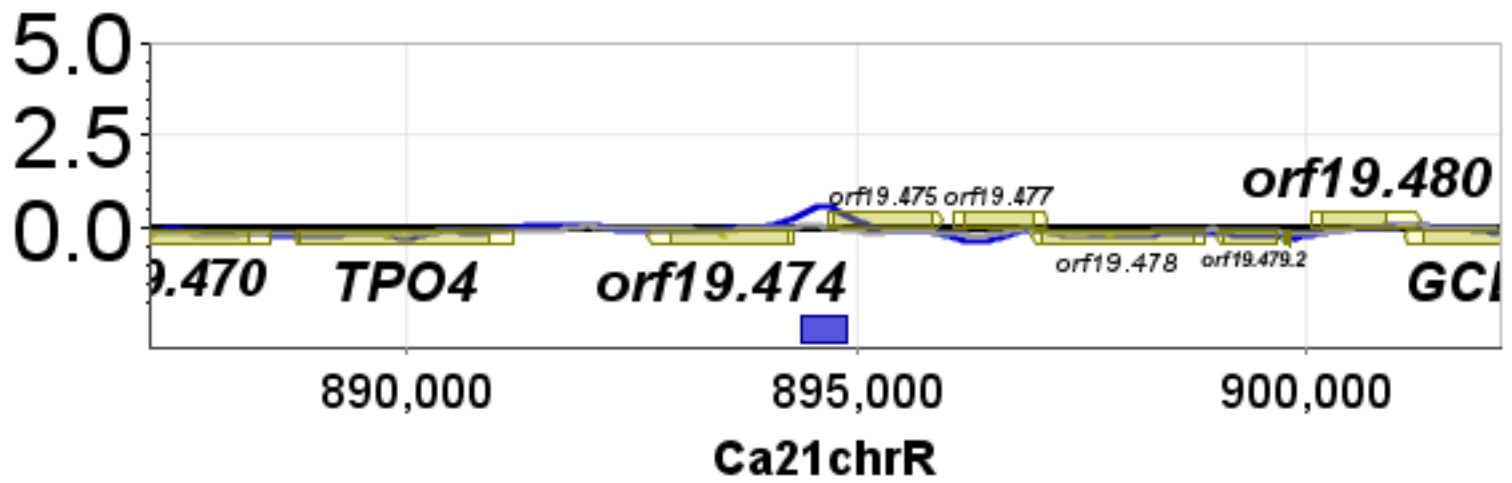

[0.6] Ca21chr2:1645437-1660436 [+] [PHM7, orf19.2169, orf19.2168.3, ntar\_438, orf19.2168]

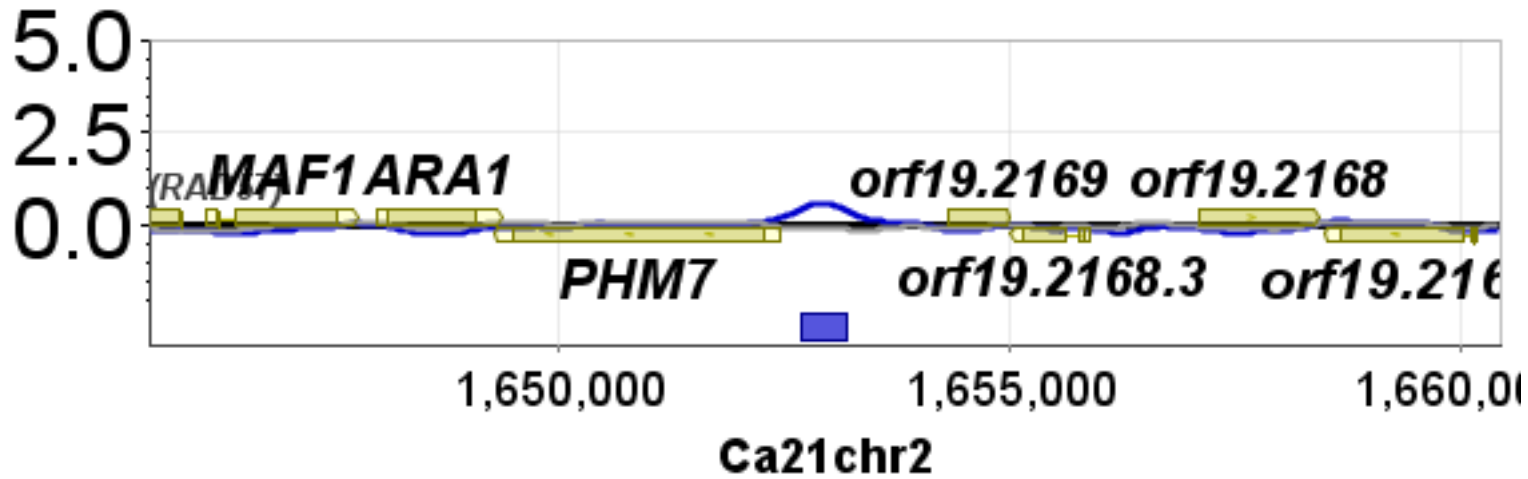

[0.6] Ca21chr3:1213108-1228107 [+] [ntar\_633, orf19.6983, ntar\_632, orf19.6984]

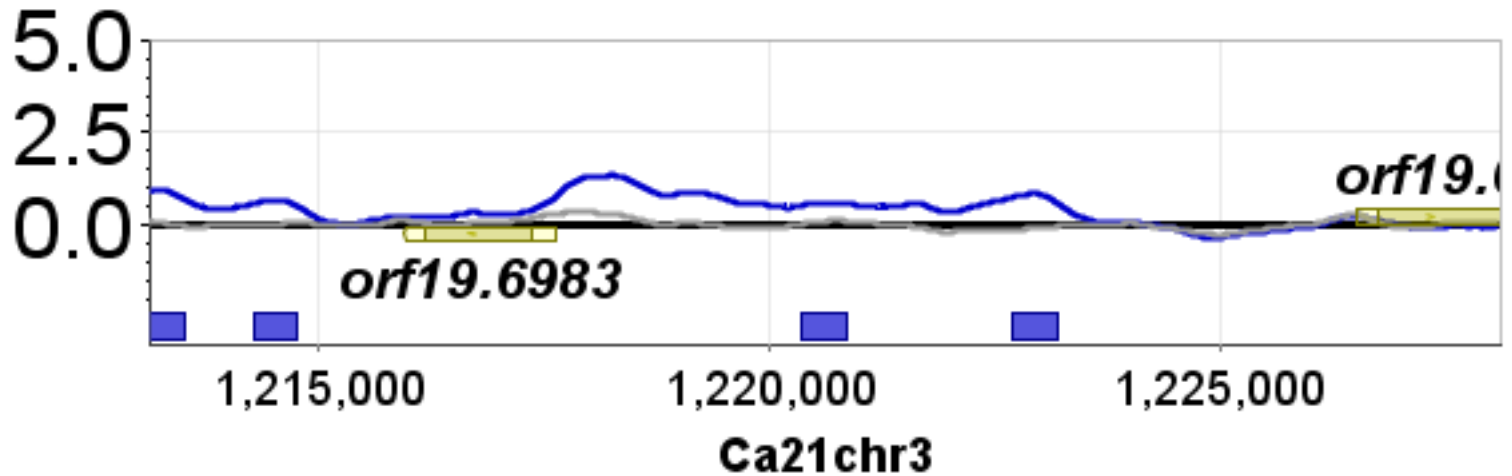

[0.6] Ca21chr7:484355-499354 [+] [orf19.6487, LDG3, orf19.6488, orf19.6484, FMP45]

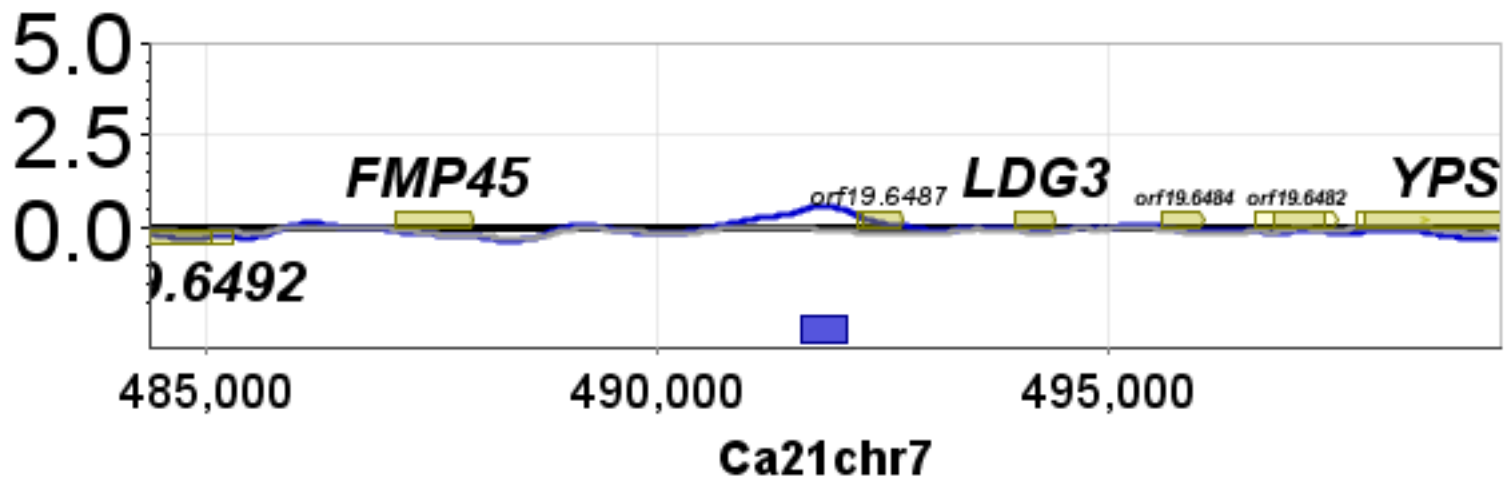

[0.593] Ca21chr5:38021-53020 [+] [PGA14, orf19.967, orf19.969, orf19.966, orf19.970]

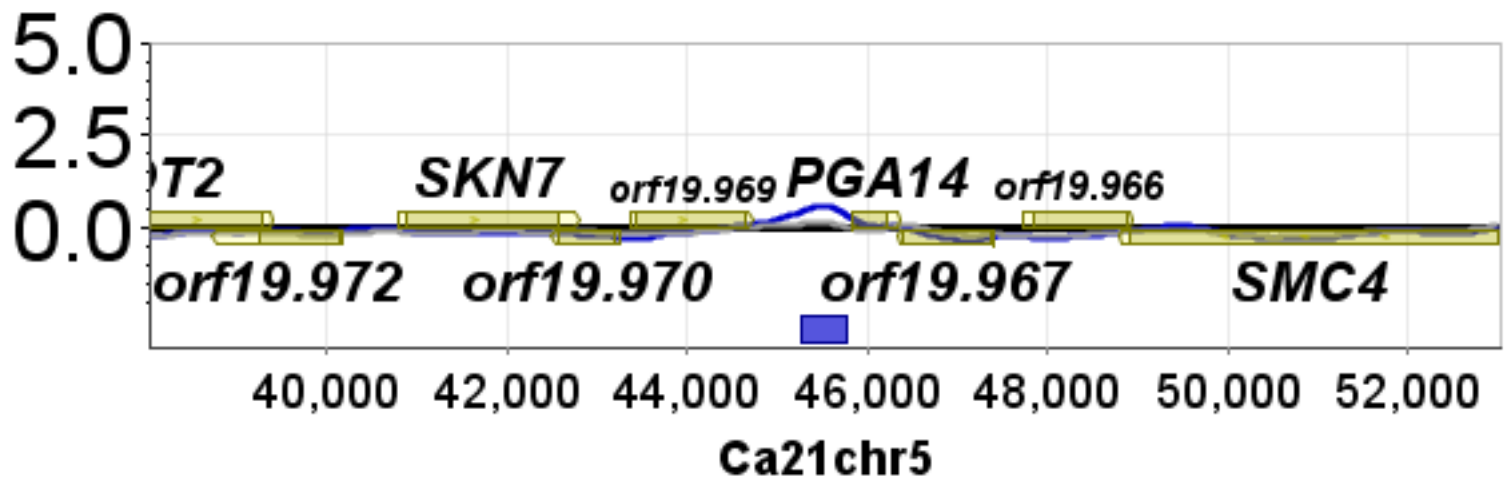

[0.592] Ca21chr5:201729-216728 [+] [GIT2, URA4, orf19.1975, TRX2, GIT1]

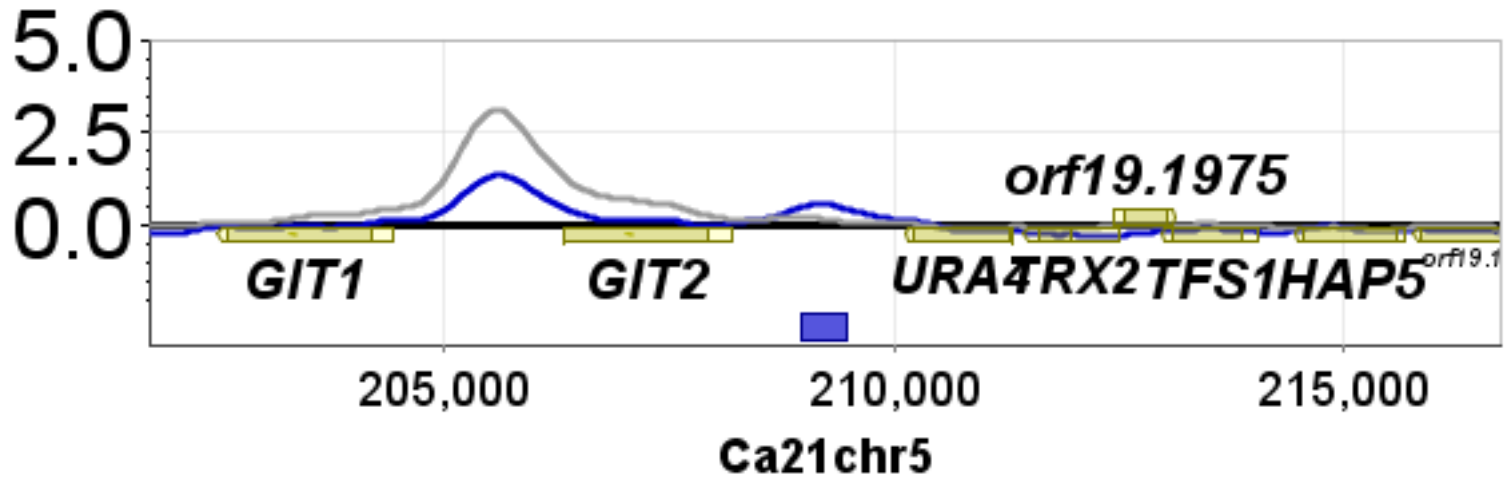

[0.59] Ca21chr1:387835-402834 [+] [orf19.4531, orf19.4532, orf19.4533, orf19.4534, orf19.4530.1]

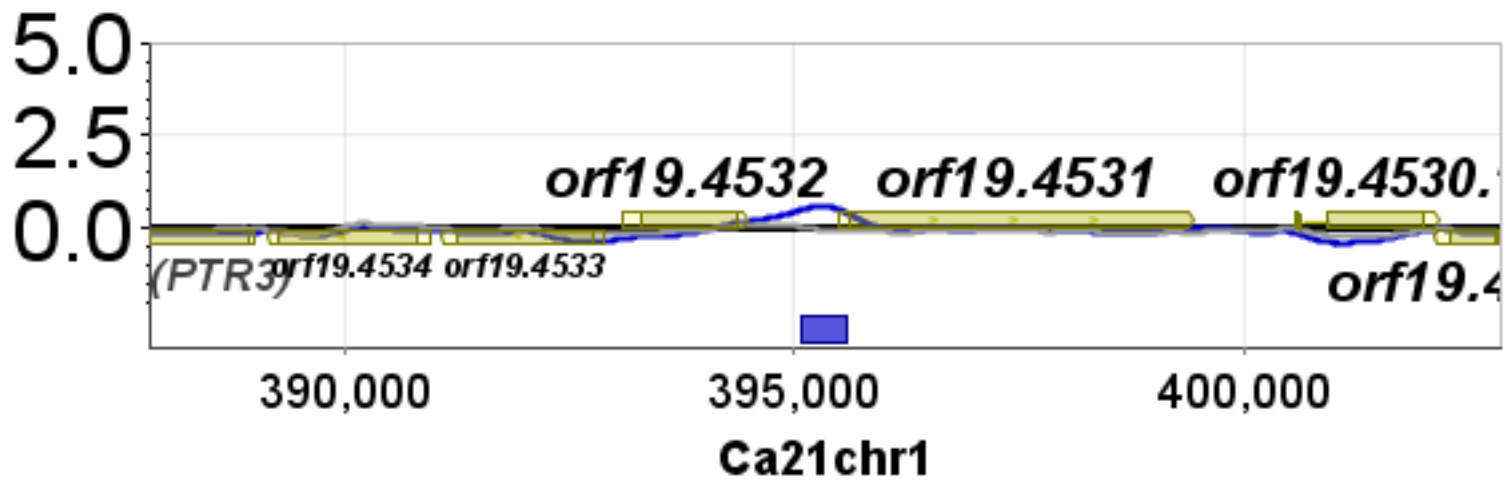

[0.59] Ca21chr1:2623742-2638741 [+] [ntar\_247, orf19.5264, KIP4, SER33, orf19.5262]

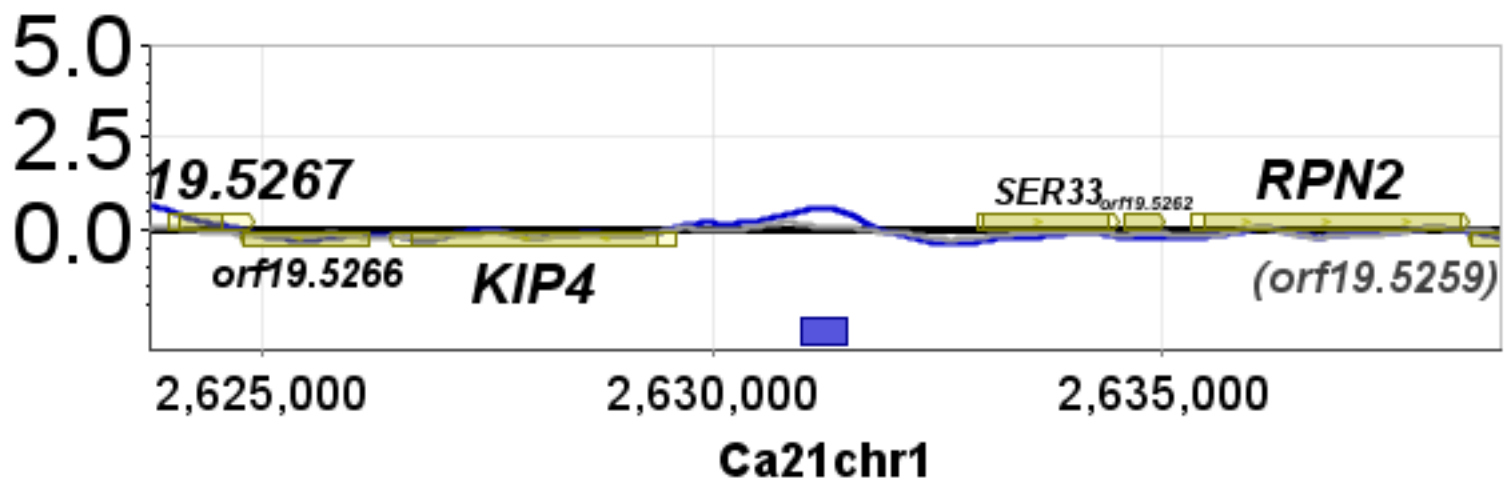

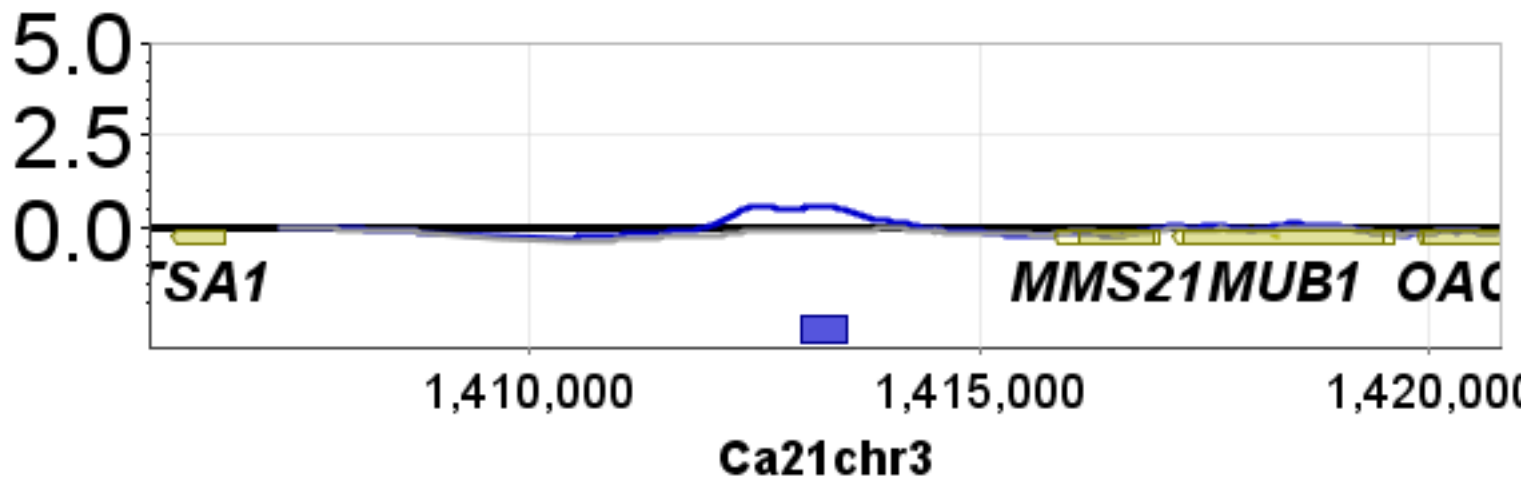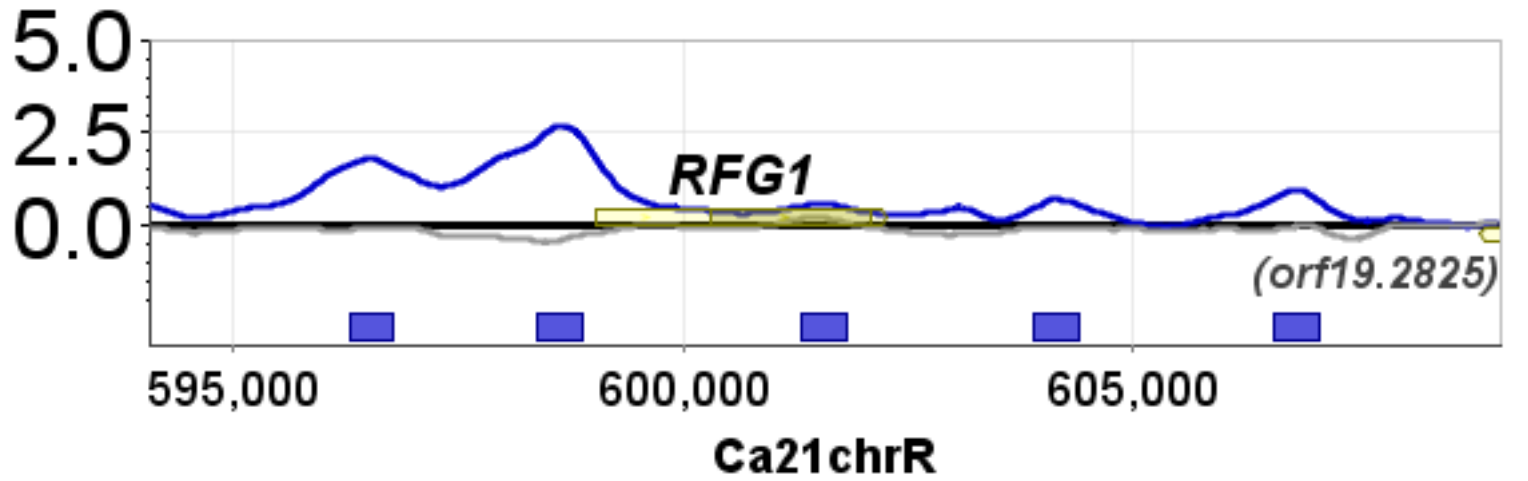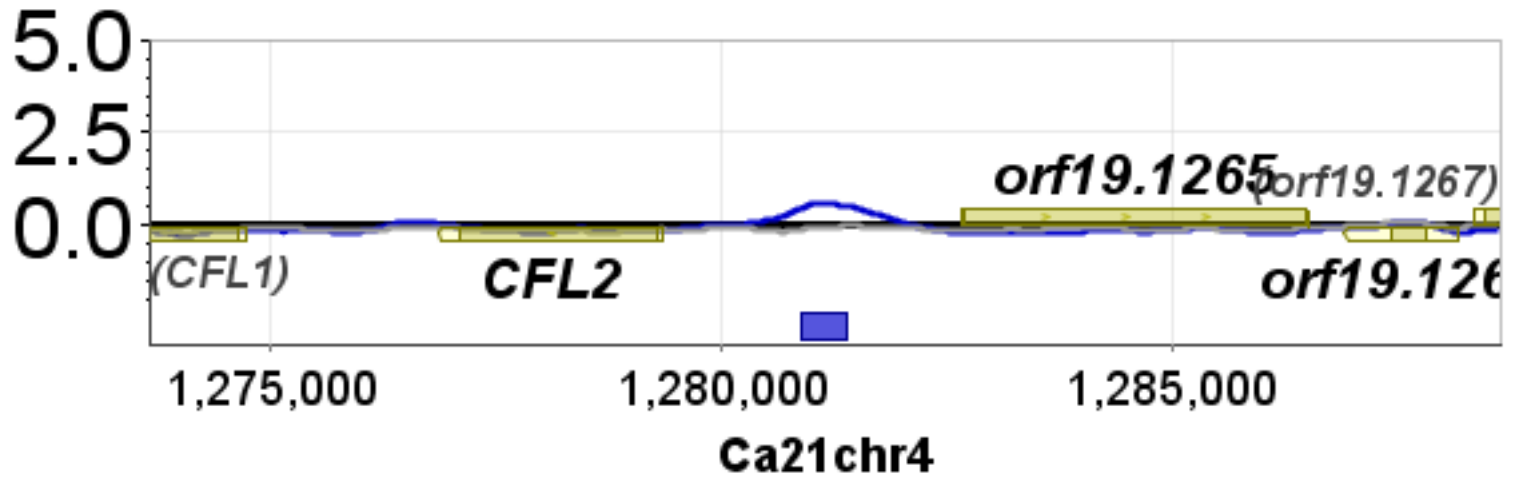

## **Full genome chromatin immunoprecipitation (ChIP-chip) mapping of Ahr1 binding sites in opaque cells.**

Plots of 15kb regions centered on the set of 250 Ahr1 binding sites in opaque cells.

Smoothed enrichment data for the Ahr1-myc strain is shown in red, for the untagged control strain in grey. The 500bp called peaks of Ahr1 enrichment are indicated by the red boxes in the lower track in each image. Peaks are arranged in order of decreasing Ahr1 enrichment. Enrichment ( $\log_2$ ) is indicated on the y-axis. Chromosomal locations and specific enrichment levels for the peak are indicated in the strip above each panel; when multiple peaks are present the enrichment value corresponds to the peak at the center of the plot. Yellow boxes correspond to genes; 5' or 3' untranslated regions are included as lighter shaded portions of the box. Genes plotted above the bold line read in the sense direction; genes plotted below the line read in the antisense direction. Plots produced using the SnapShot Function in MochiView v1.46 (Homann and Johnson, 2010).

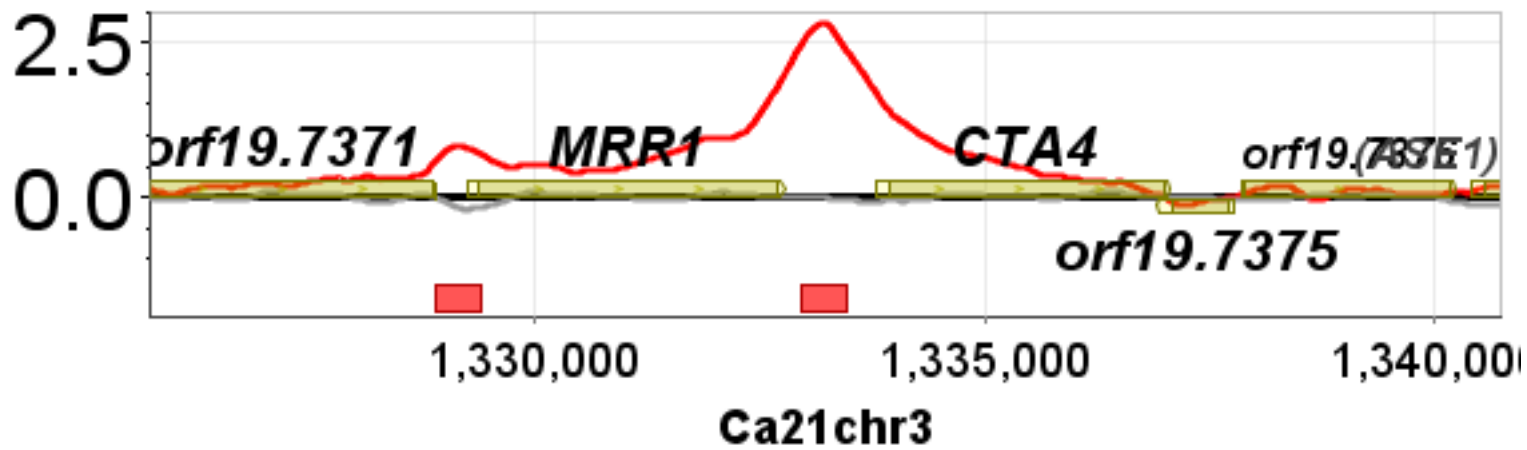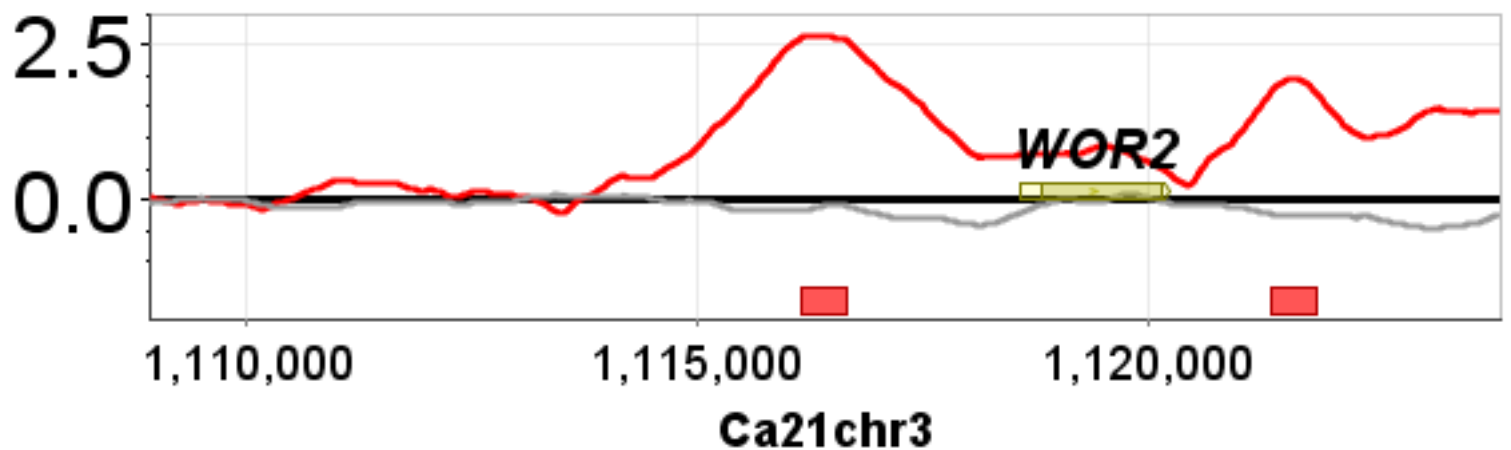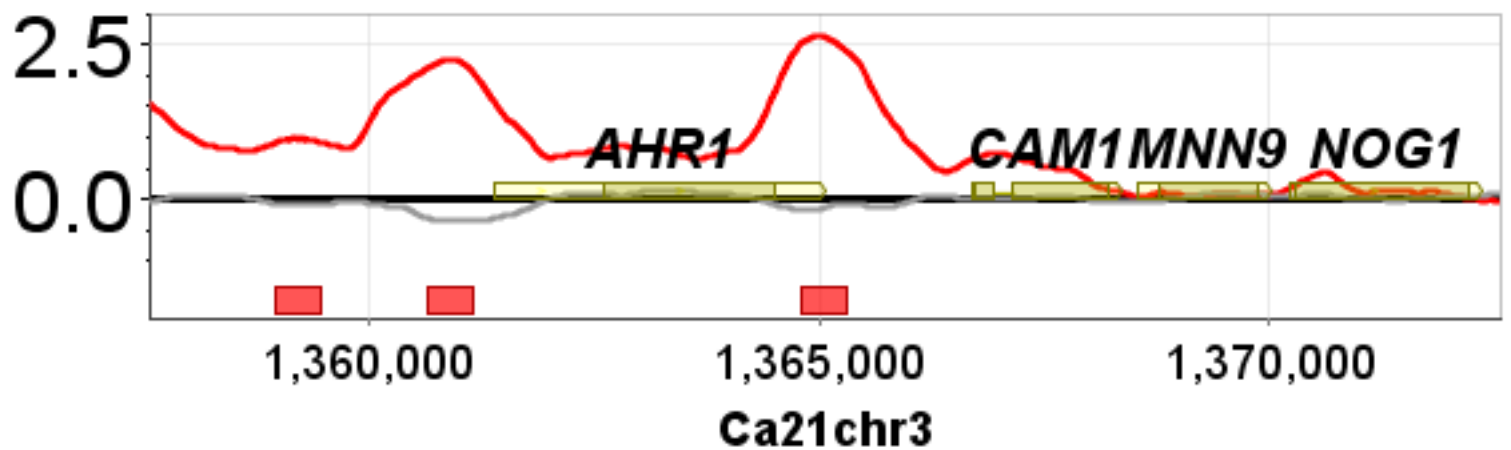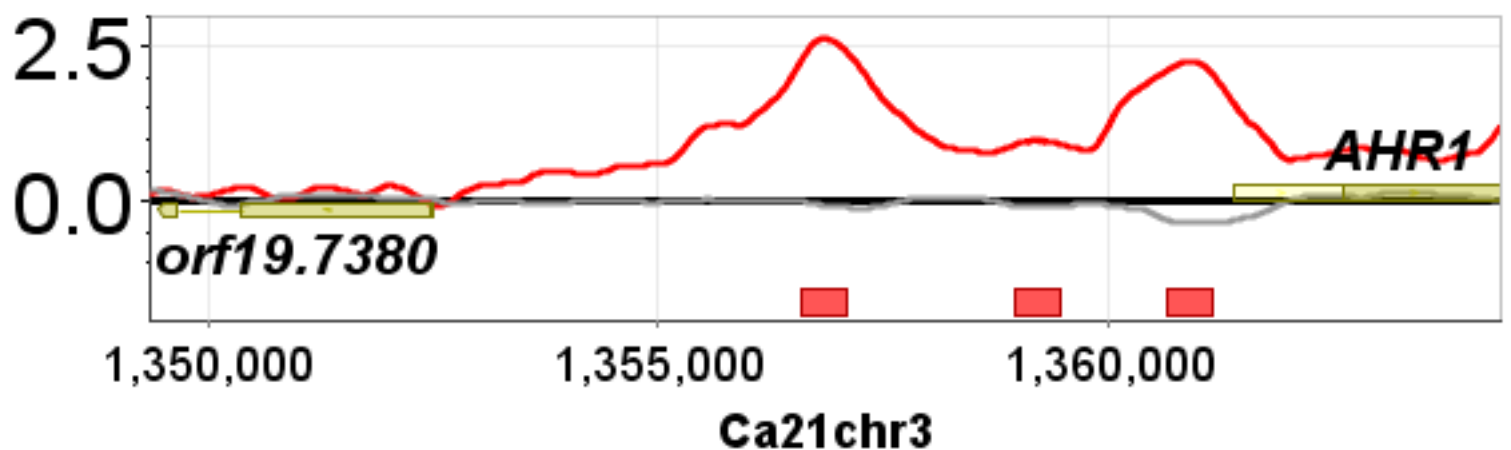

[2.631] Ca21chr5:762883-777882 [+] [te(uuc)5, orf19.2638, orf19.2639, orf19.2639.1, FUR1]

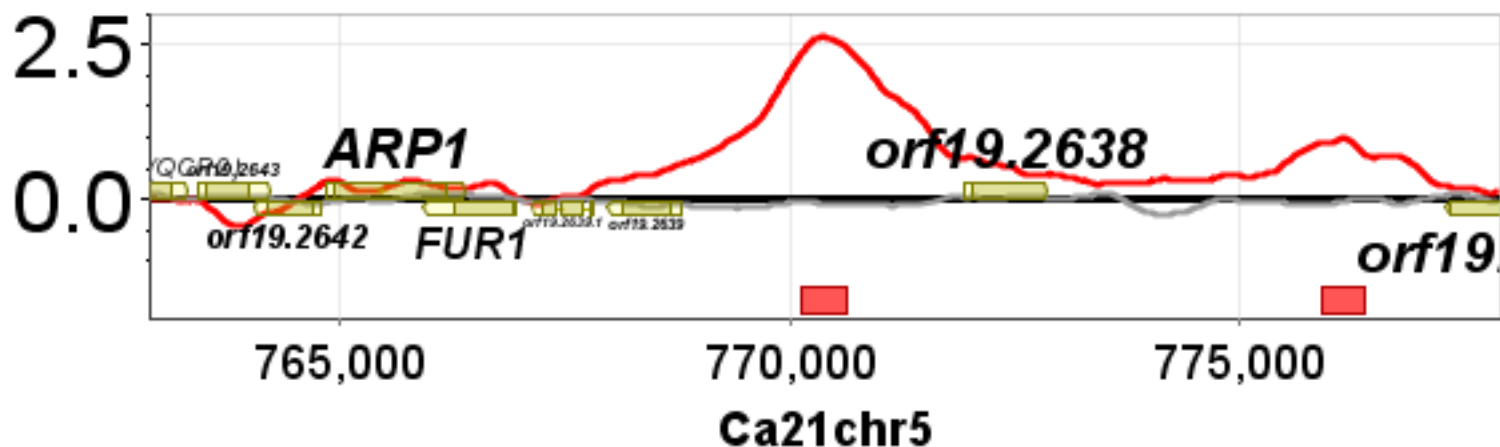

[2.611] Ca21chr1:1564626-1579625 [+] [ntar\_139, ntar\_138, ntar\_140, tl(aag)2, RME1]

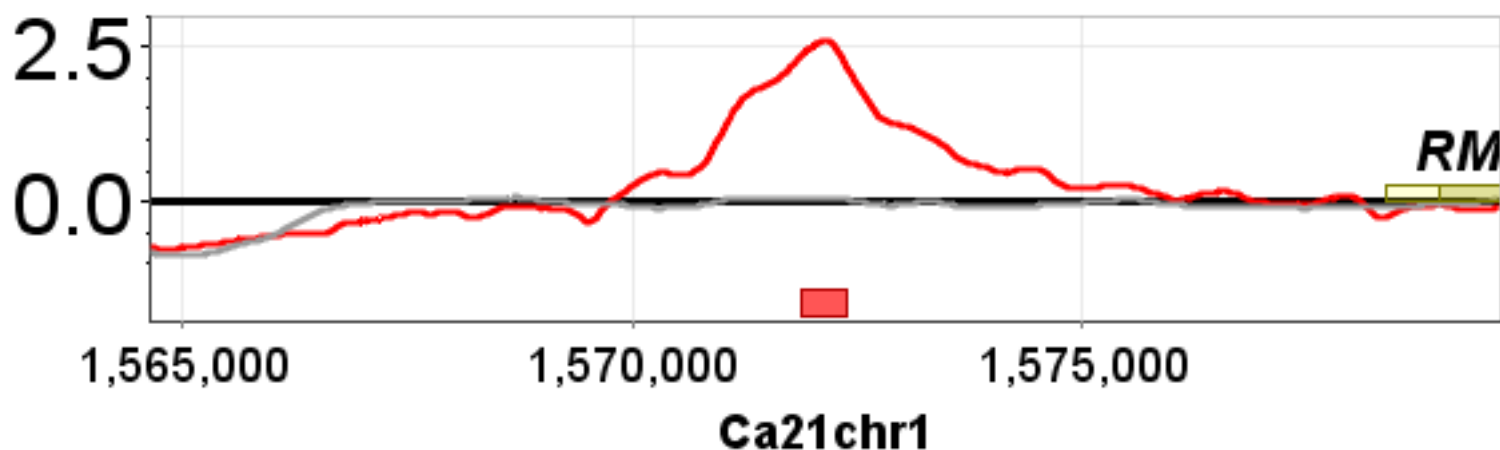

[2.558] Ca21chrR:1420162-1435161 [+] [orf19.699, ntar\_1319, orf19.698, ntar\_1320, SEO1]

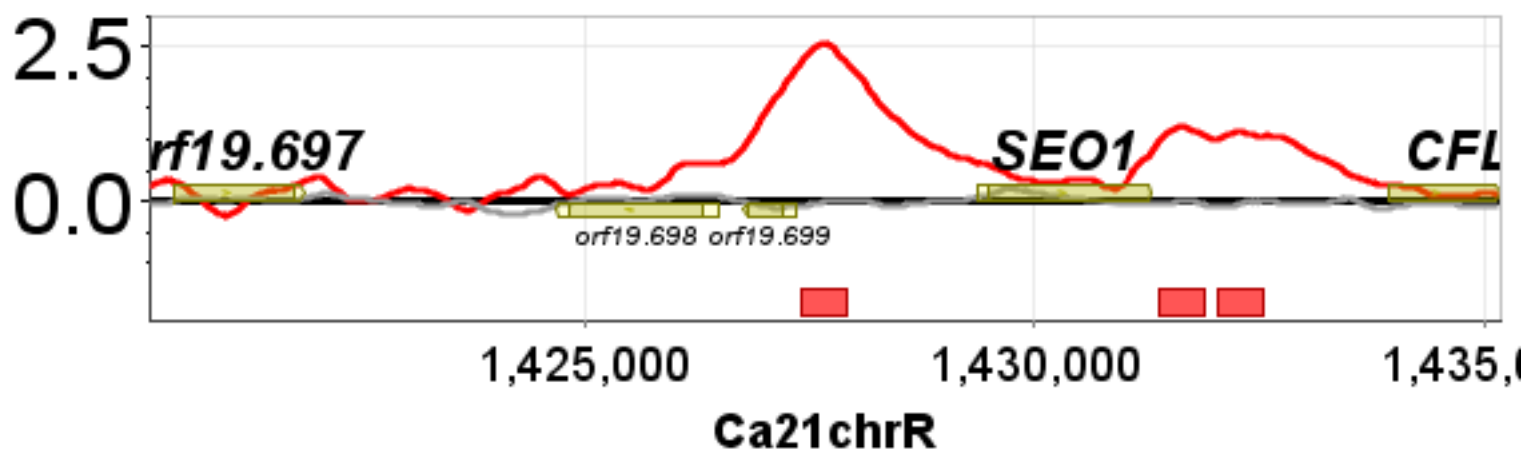

[2.541] Ca21chr2:1785606-1800605 [+] [orf19.3586, SPO11, IPP1, orf19.3585, APE3]

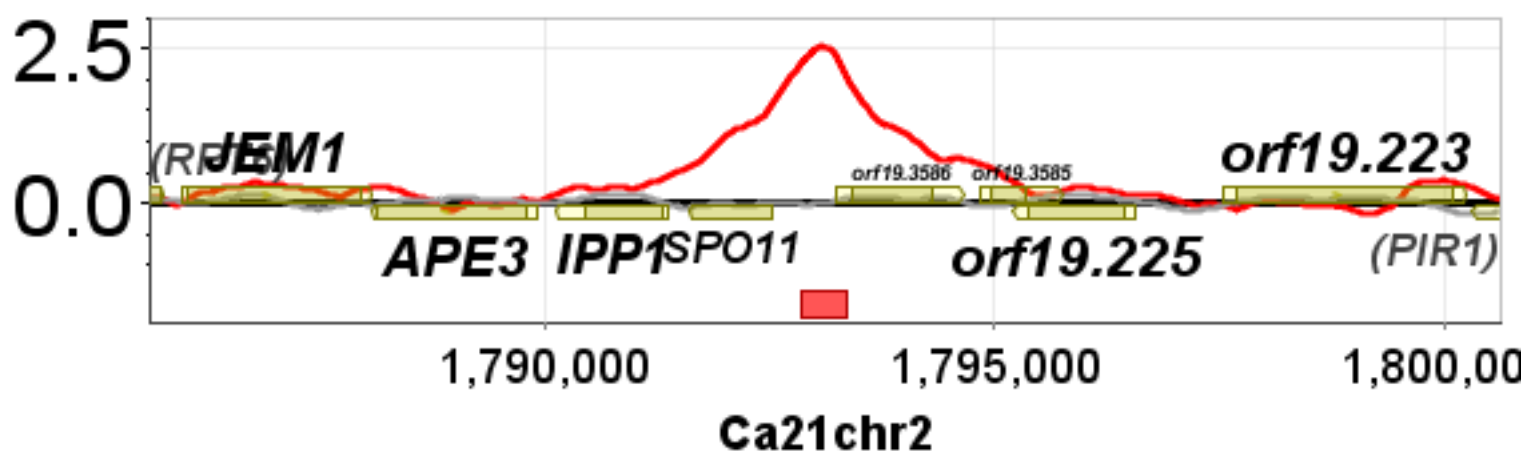



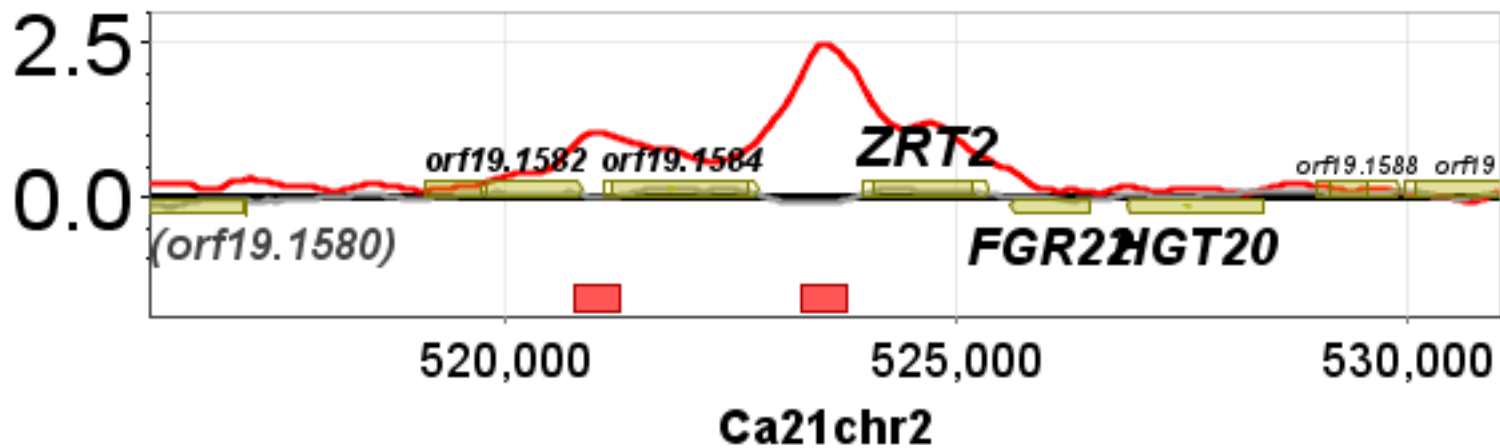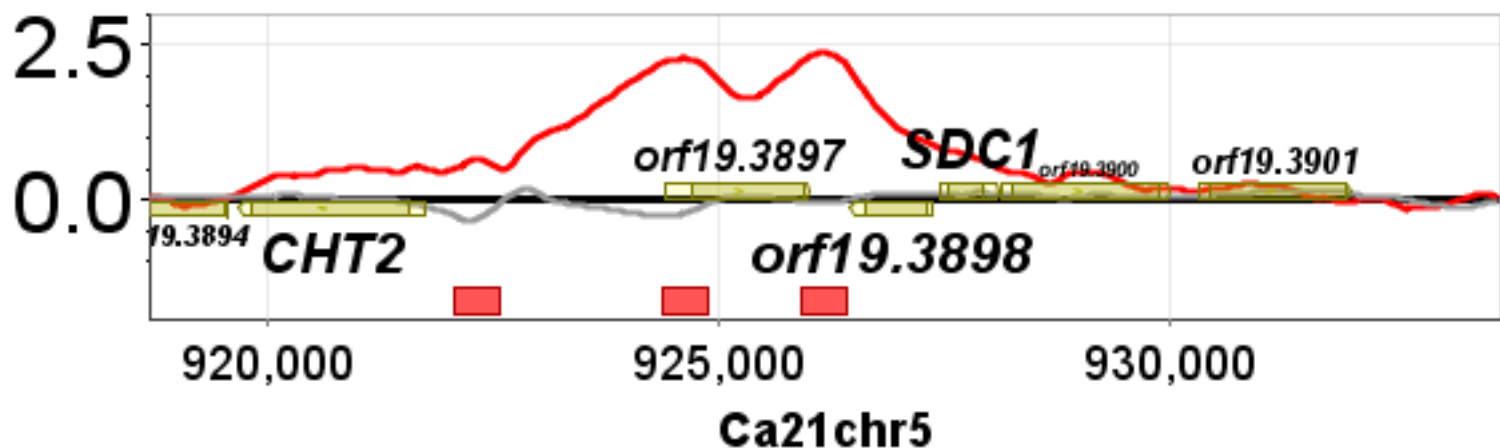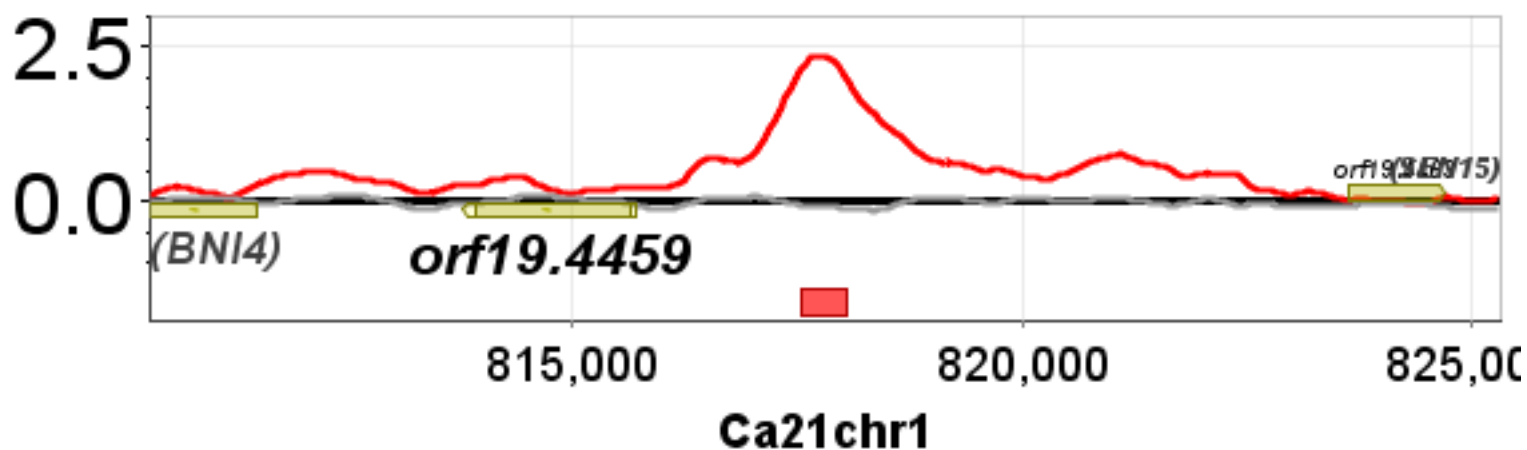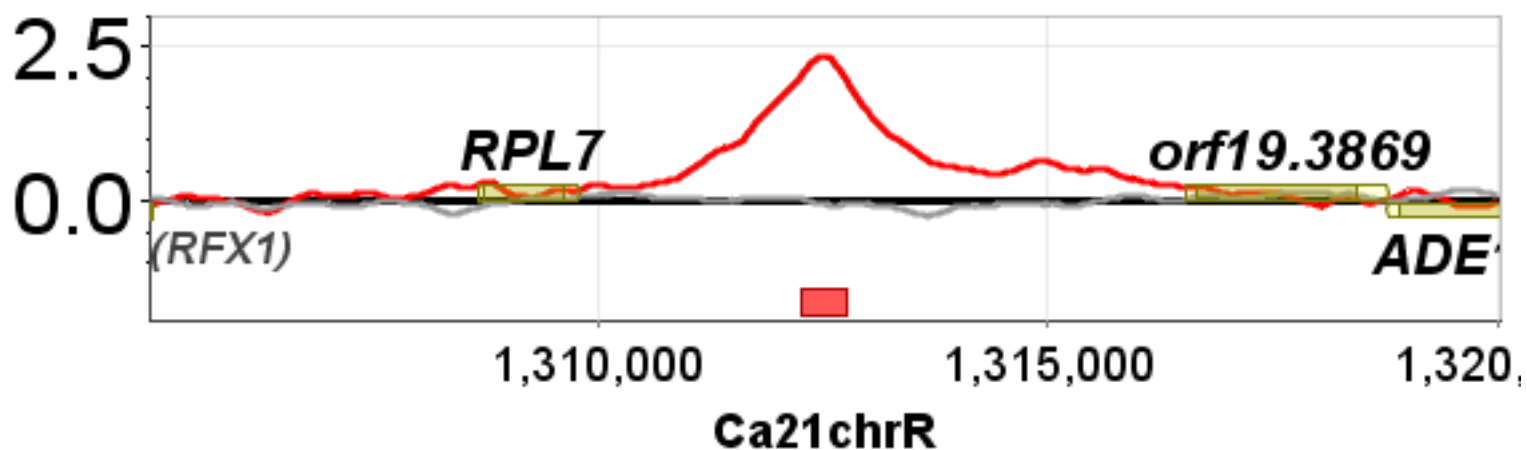

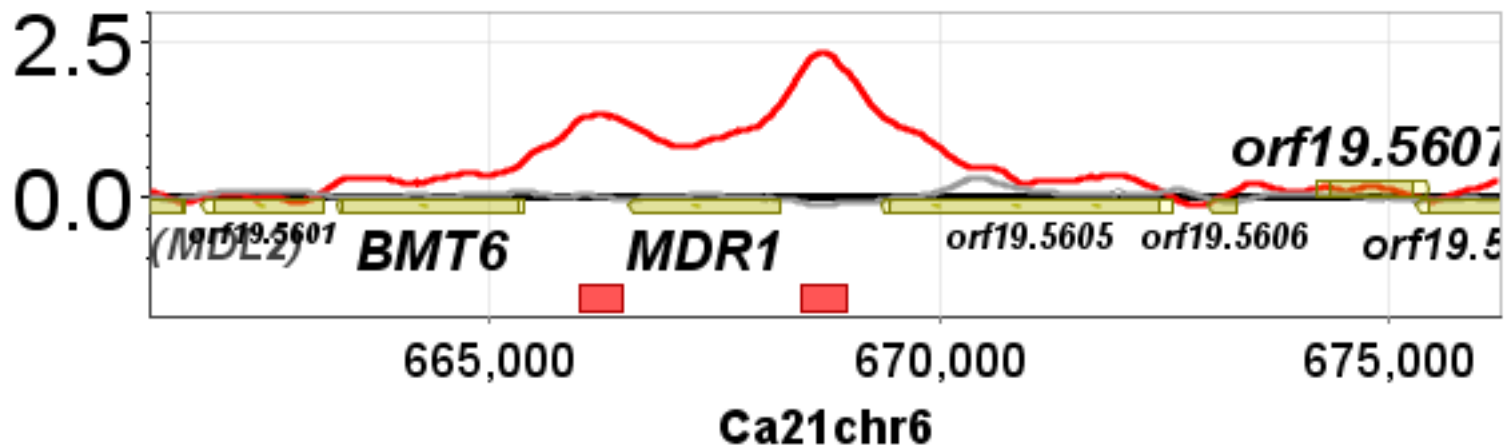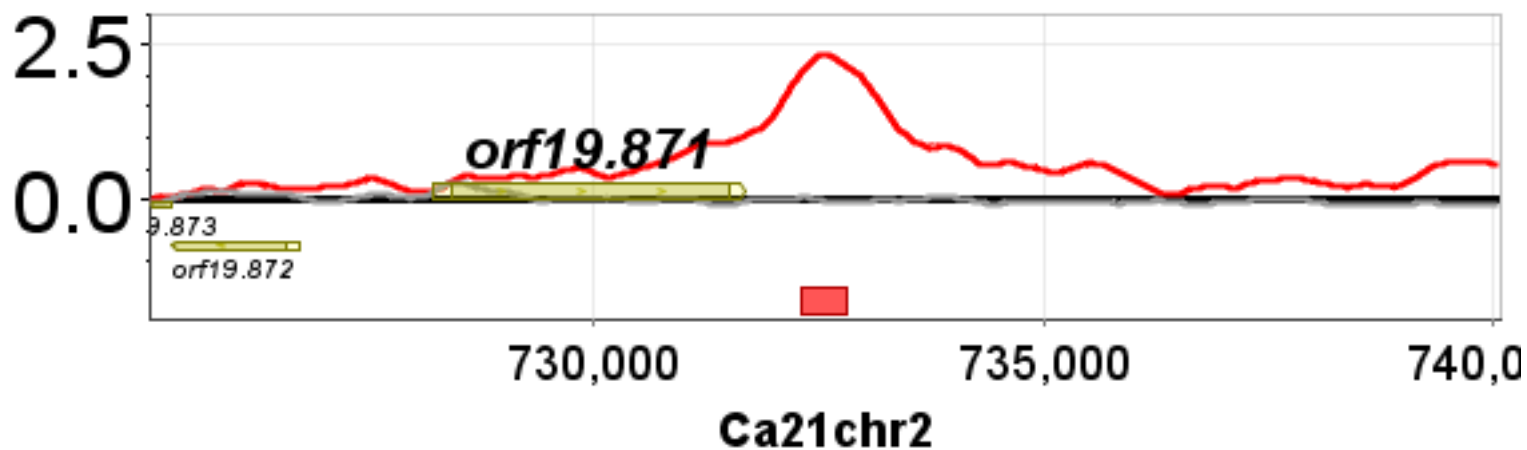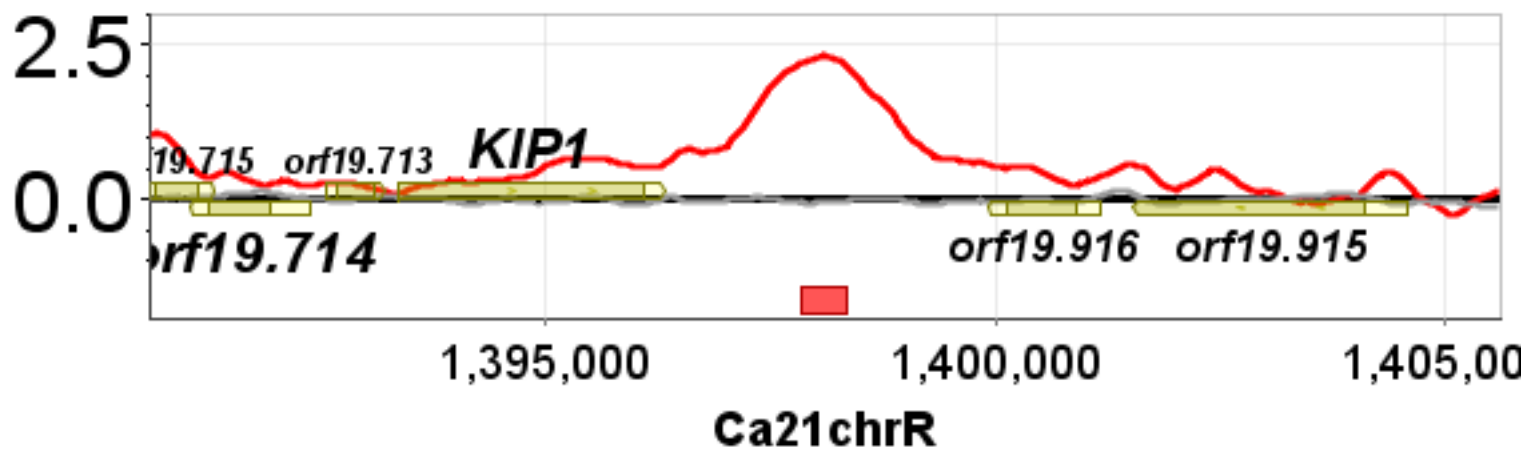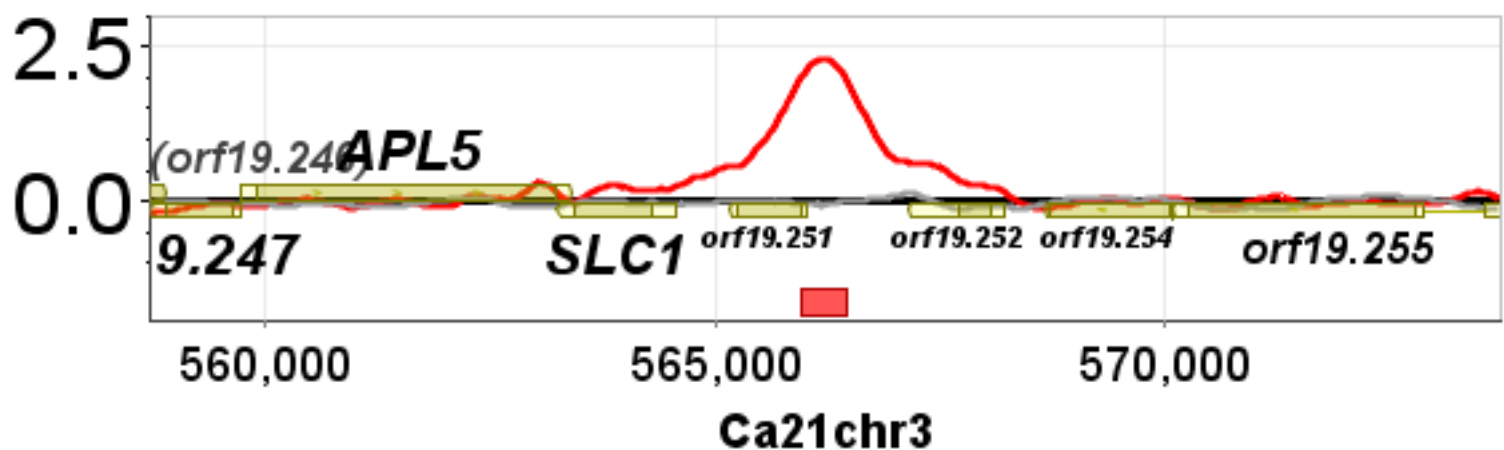

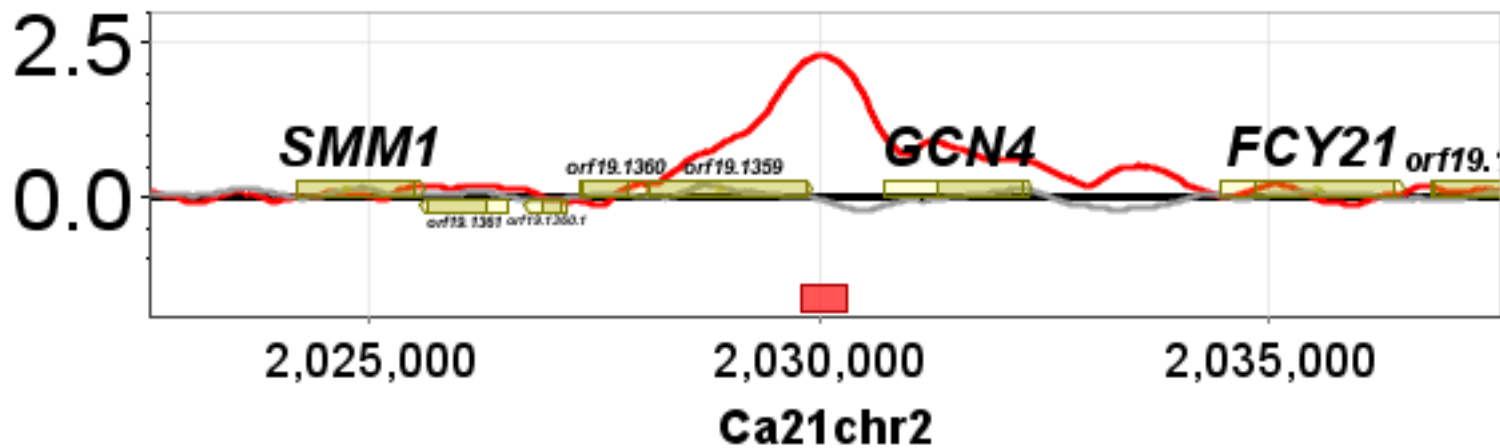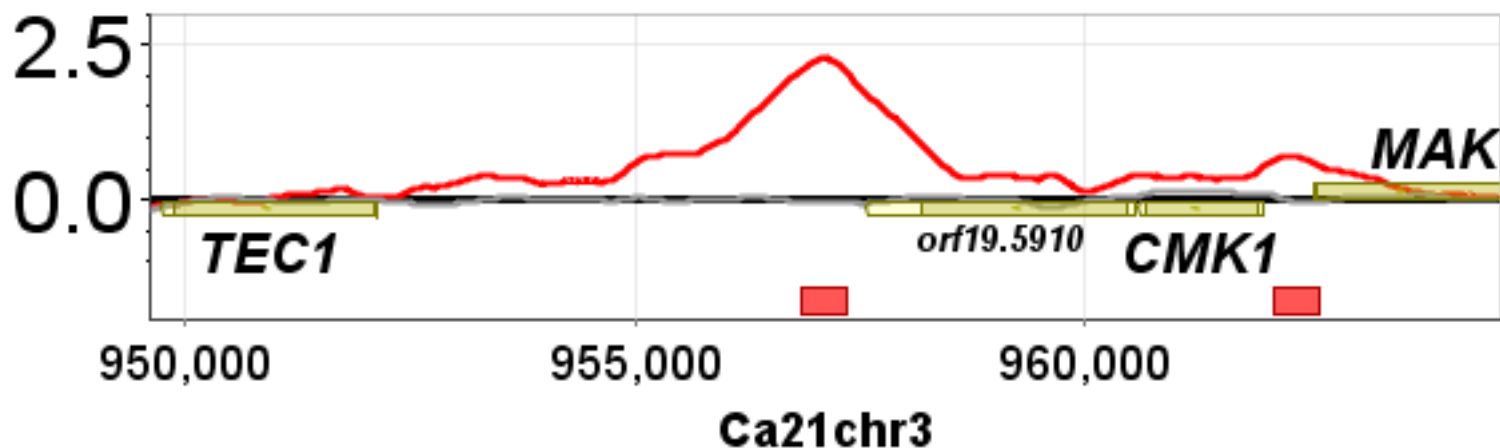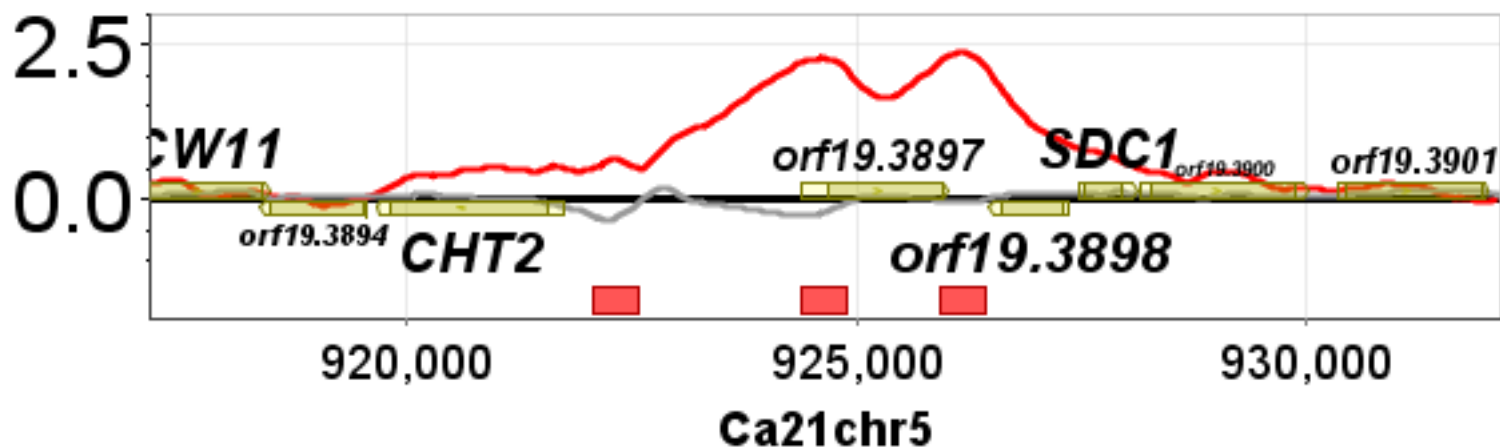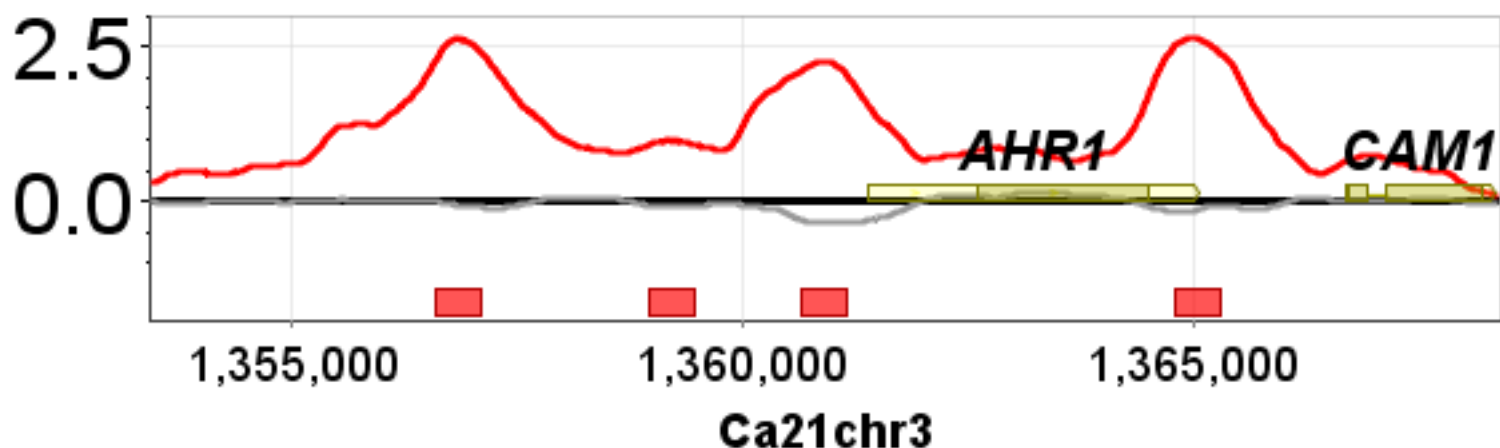

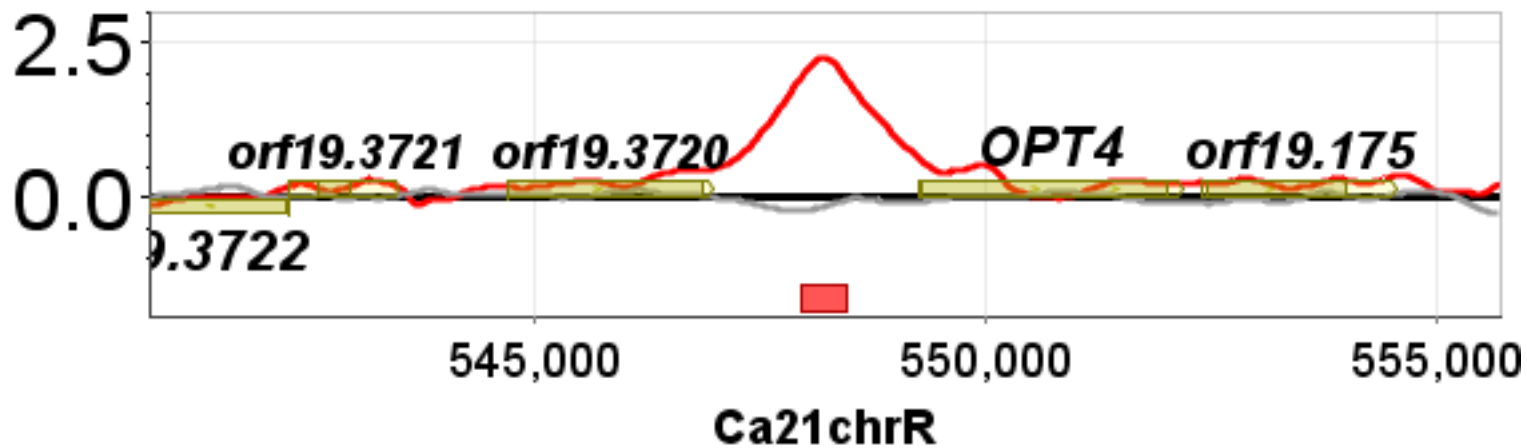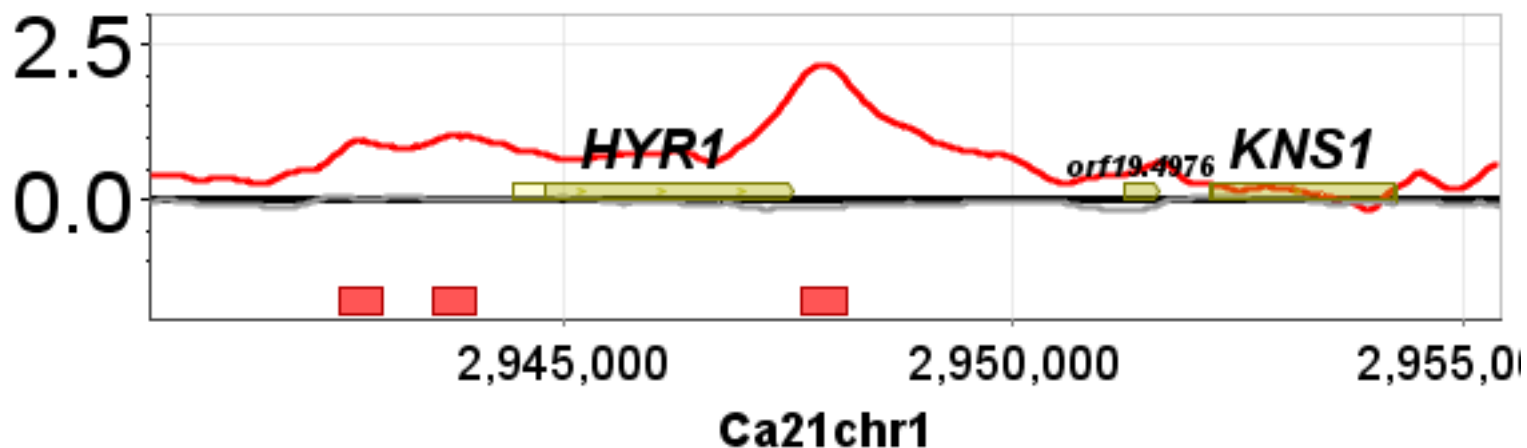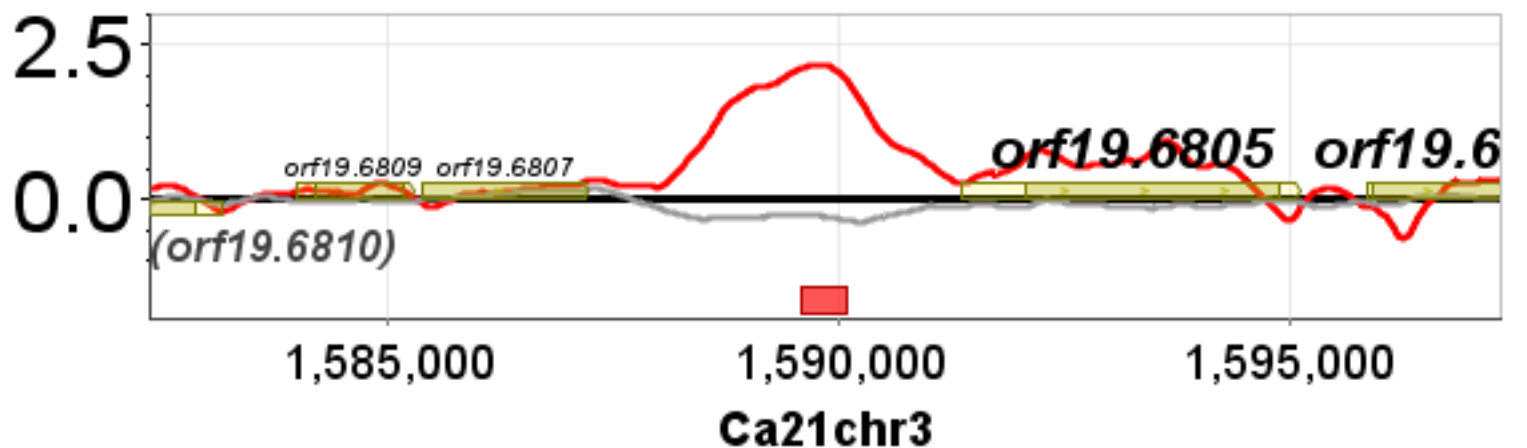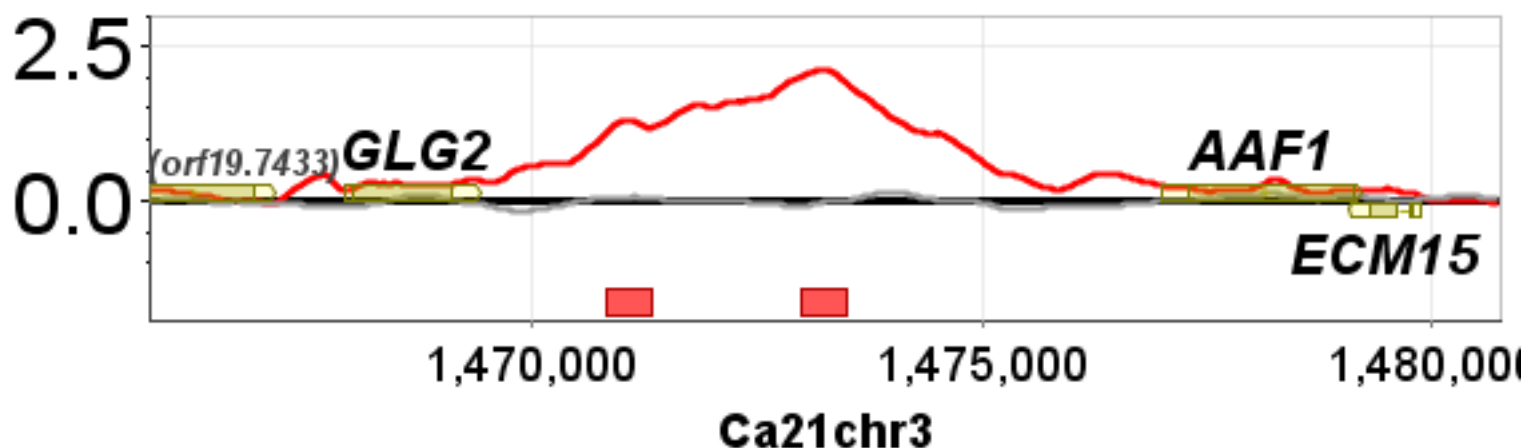

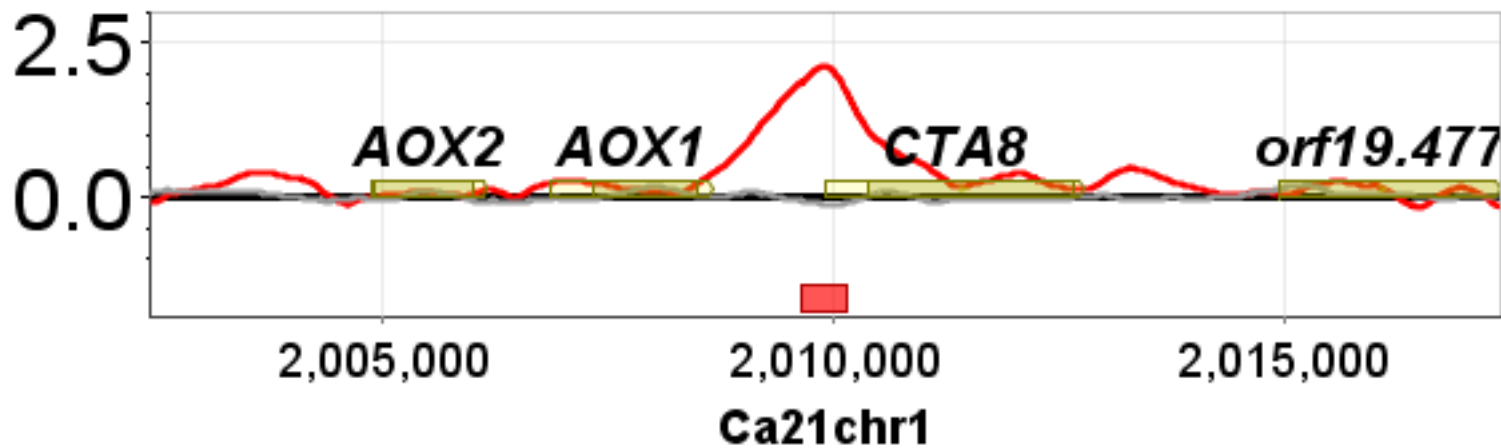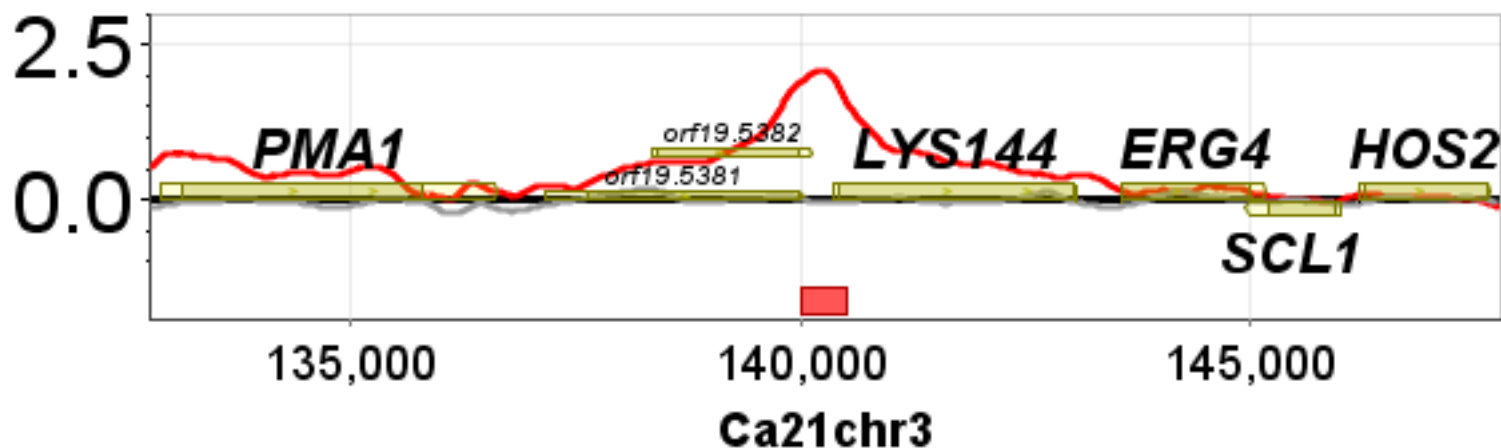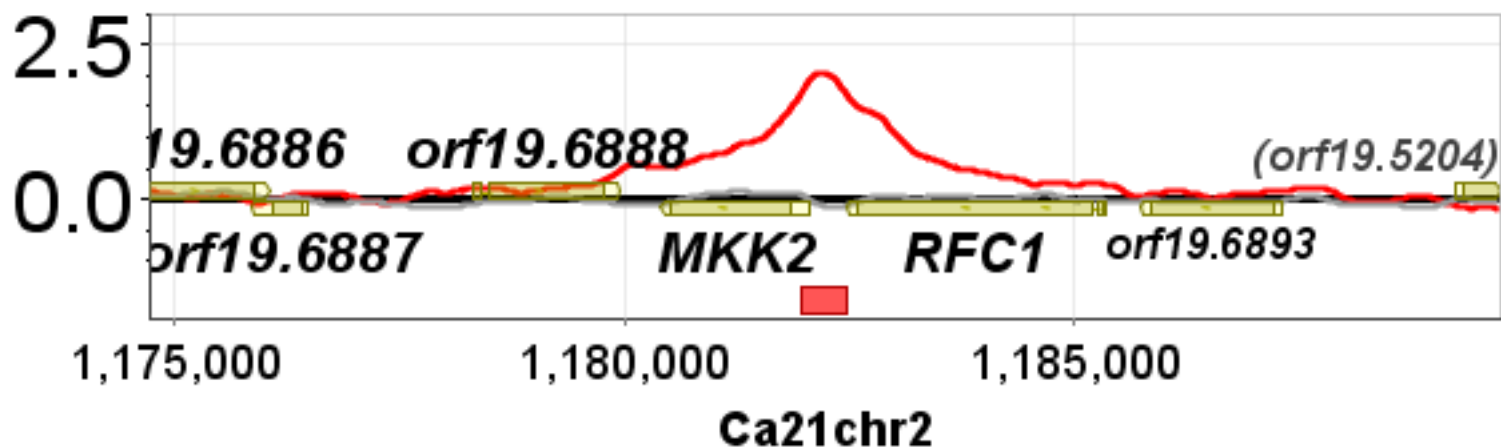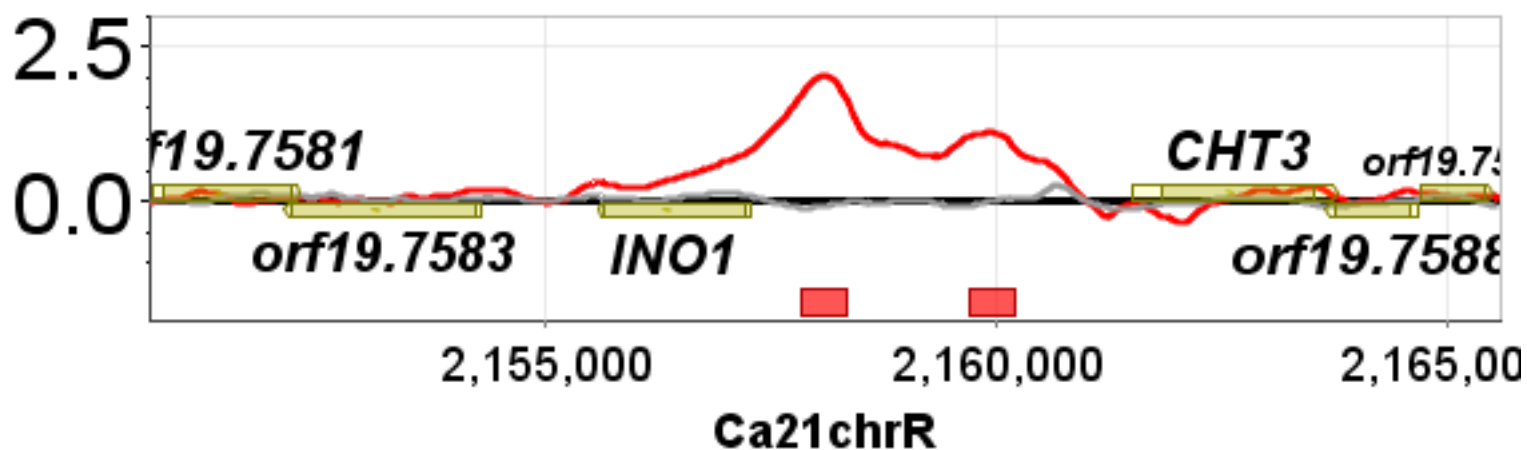

[2.01] Ca21chr1:2575520-2590519 [+] [orf19.1137, orf19.1139, orf19.1136, CAS1, orf19.1140]

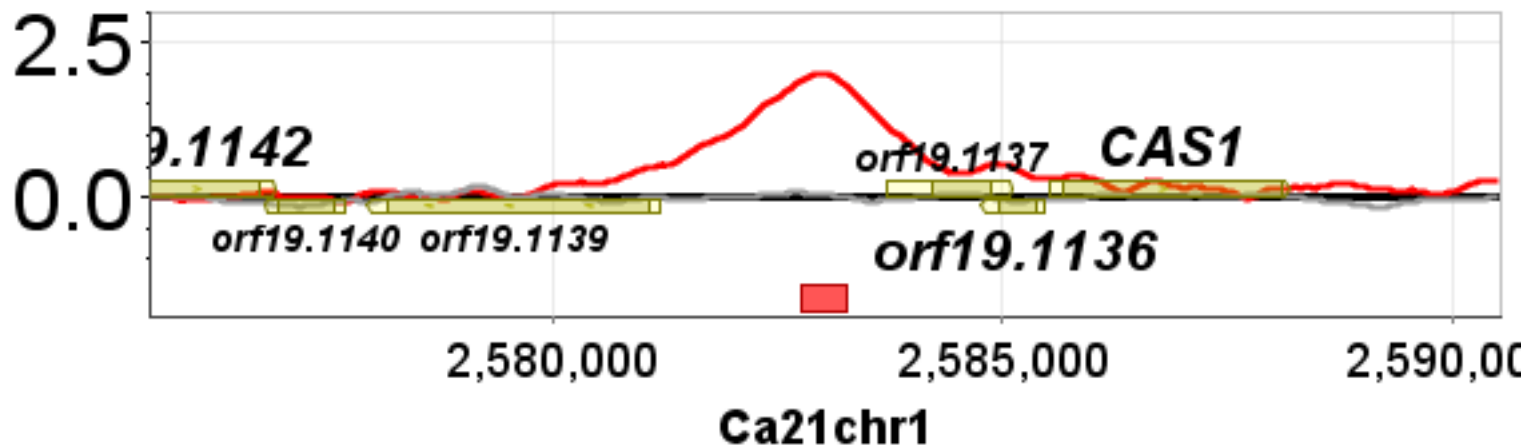

[1.999] Ca21chr1:565479-580478 [+] [orf19.2962, orf19.2963, orf19.2961, orf19.2964, orf19.2965]

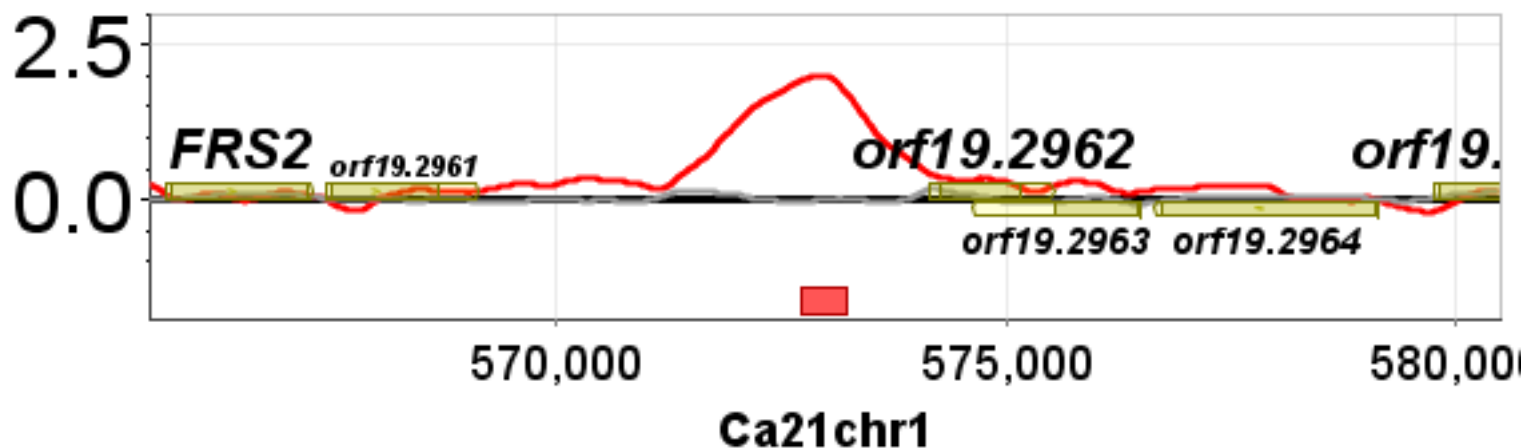

[1.986] Ca21chrR:2102902-2117901 [+] [BET2, DEF1, DPB2, YTA6]

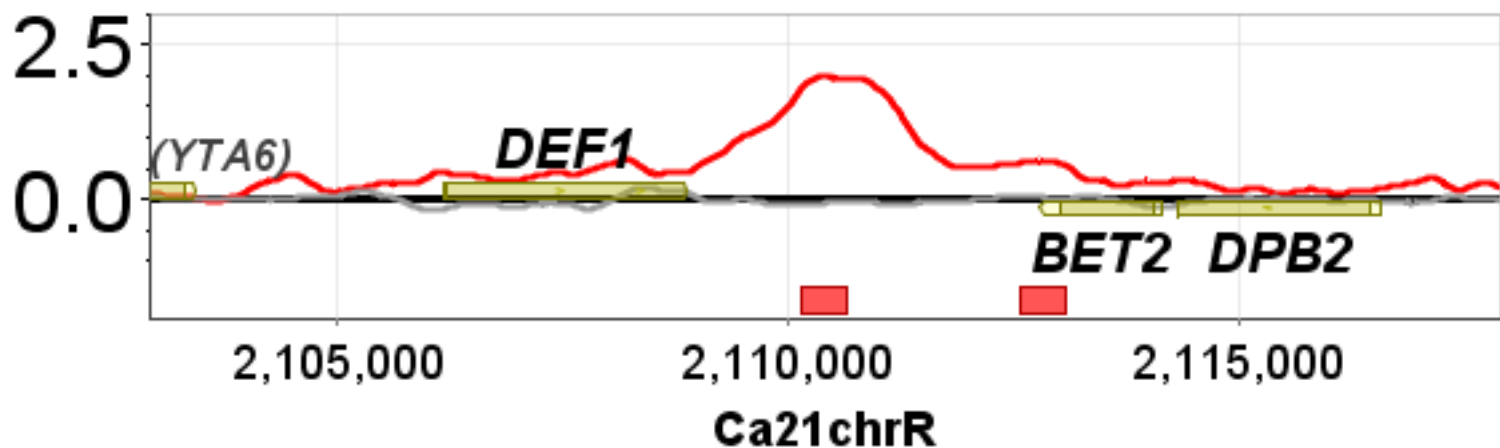

[1.972] Ca21chr7:694545-709544 [+] [ntar\_1132, orf19.5131, orf19.5132, orf19.5133, PDI1]

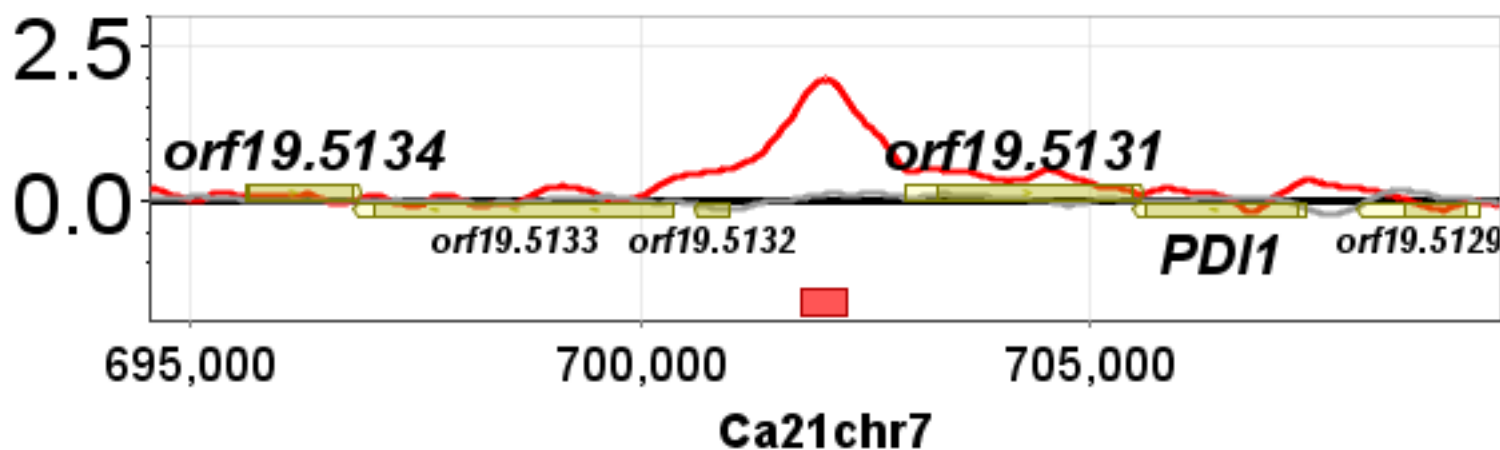

[1.952] Ca21chr3:1114137-1129136 [+] [ntar\_614, ntar\_615, ntar\_616, ntar\_617, WOR2]

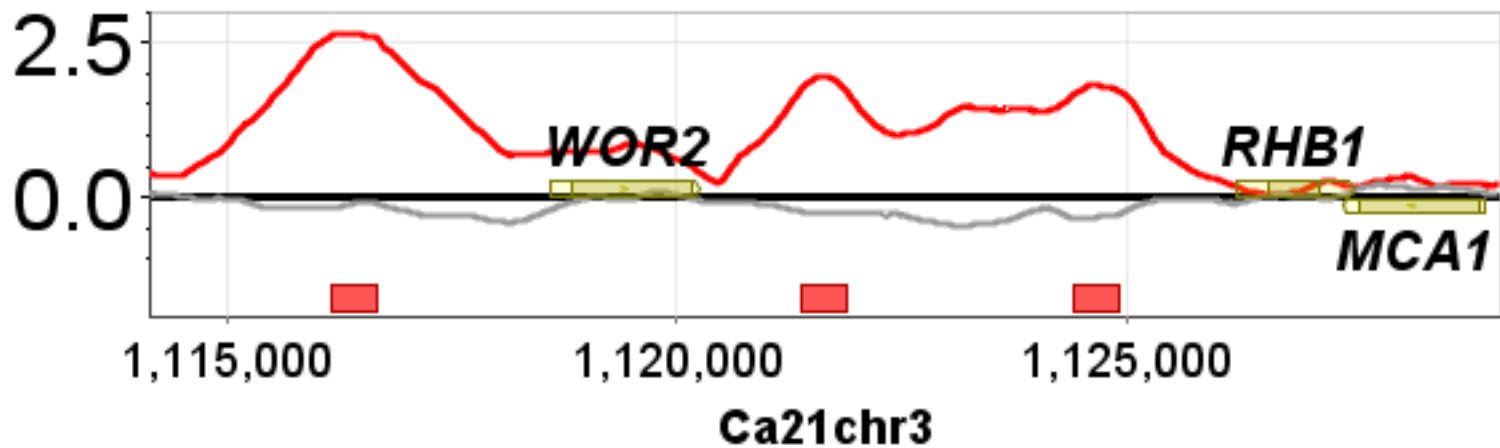

[1.94] Ca21chr2:1274984-1289983 [+] [GSP1, orf19.5495, orf19.5492, ATP14, orf19.5491]

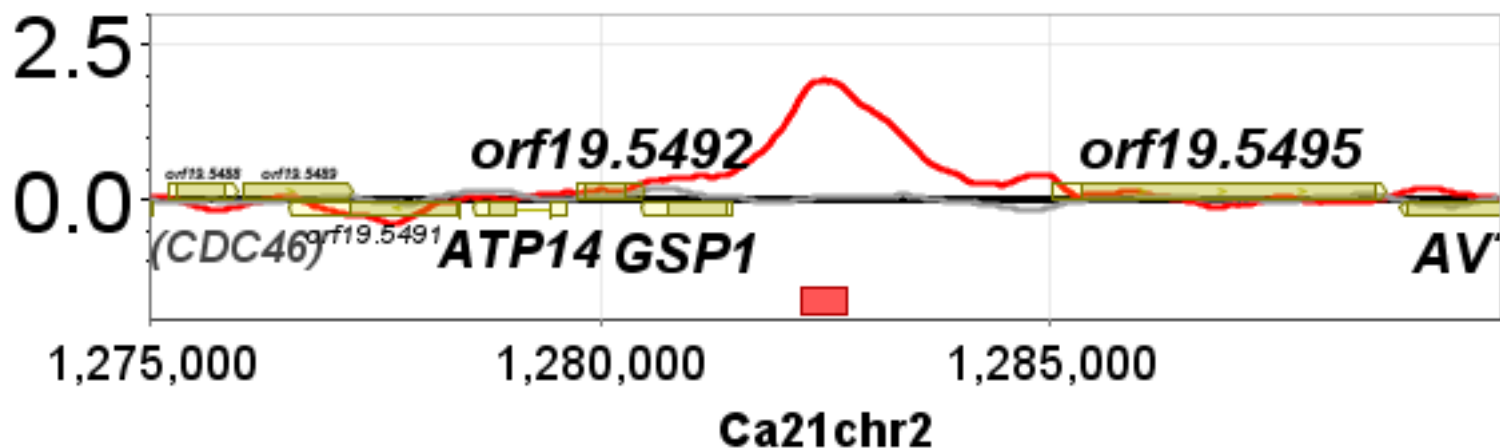

[1.932] Ca21chr1:432059-447058 [+] [HGT2, ntar\_41, SHA3, ntar\_40, ntar\_42]

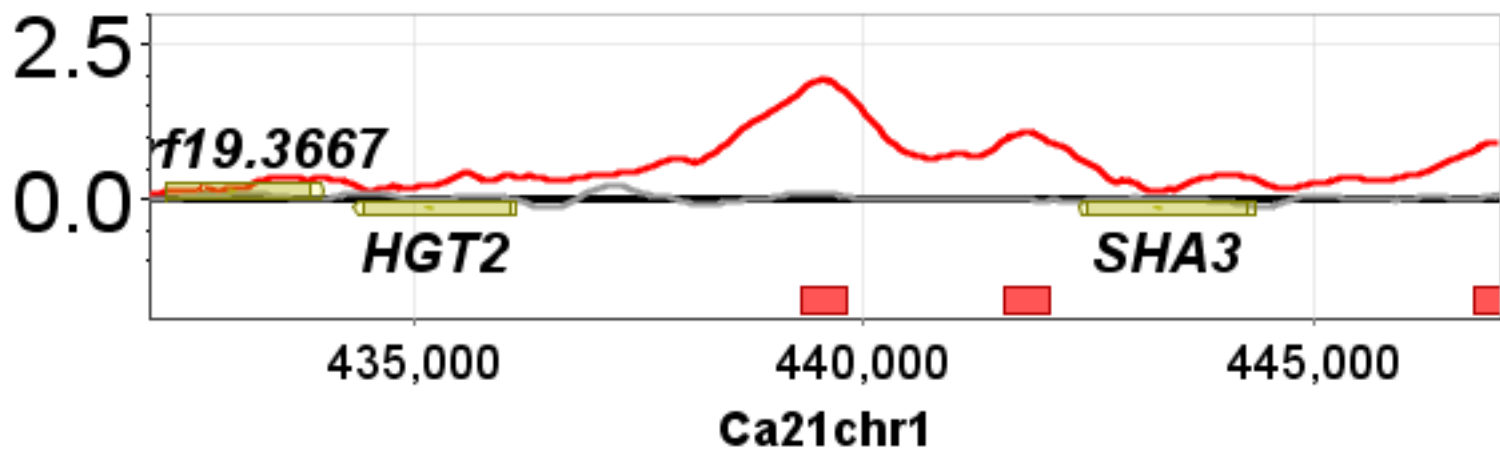

[1.895] Ca21chr4:939847-954846 [+] [FGR3, LYS4, ntar\_799, MRP8, orf19.3843]

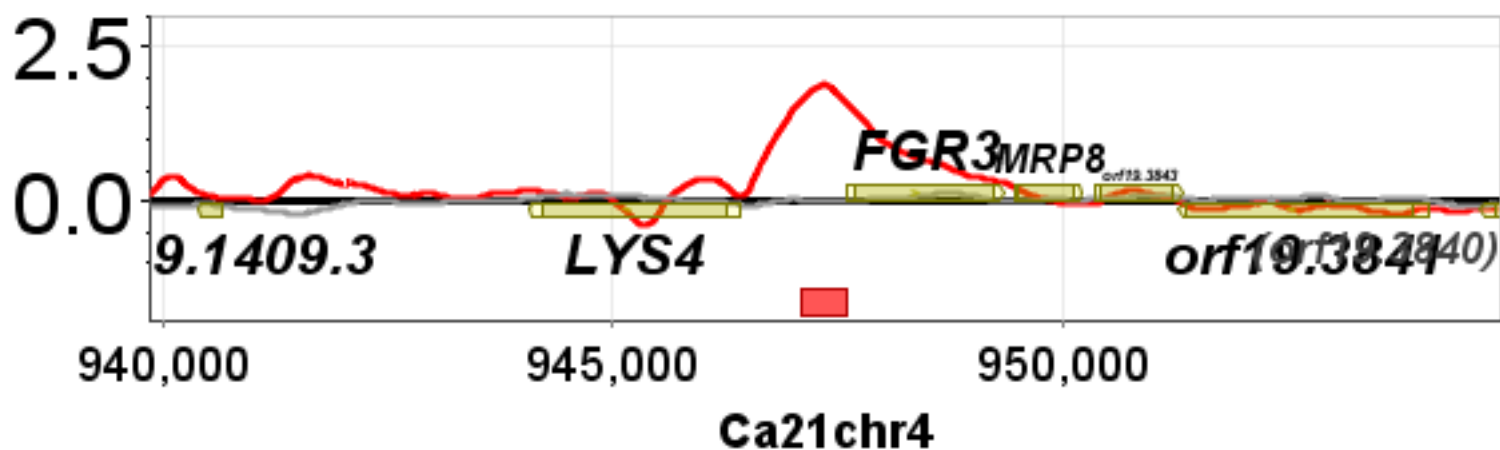

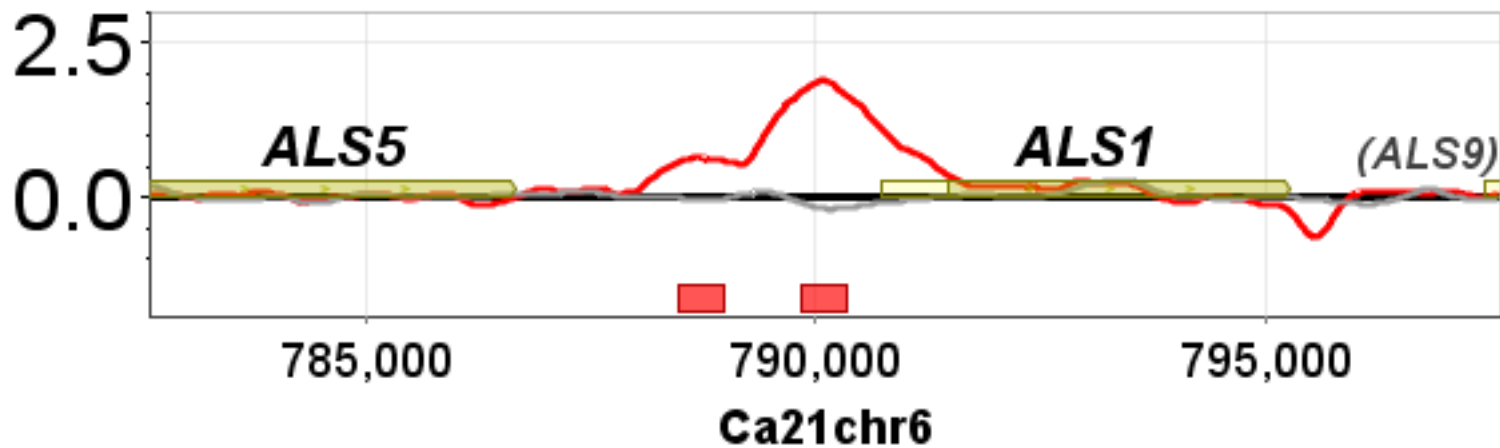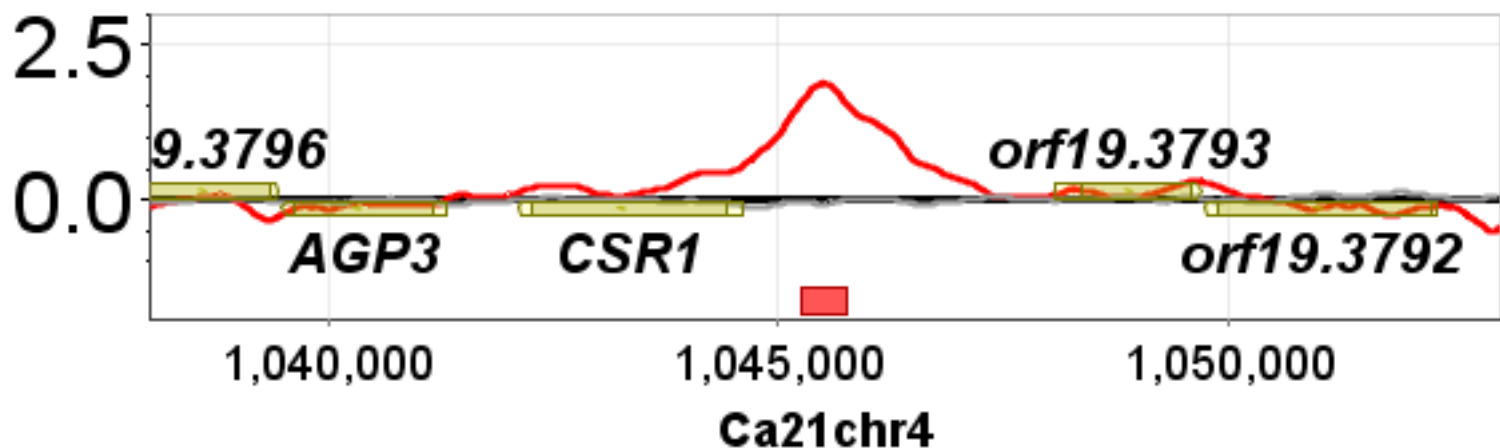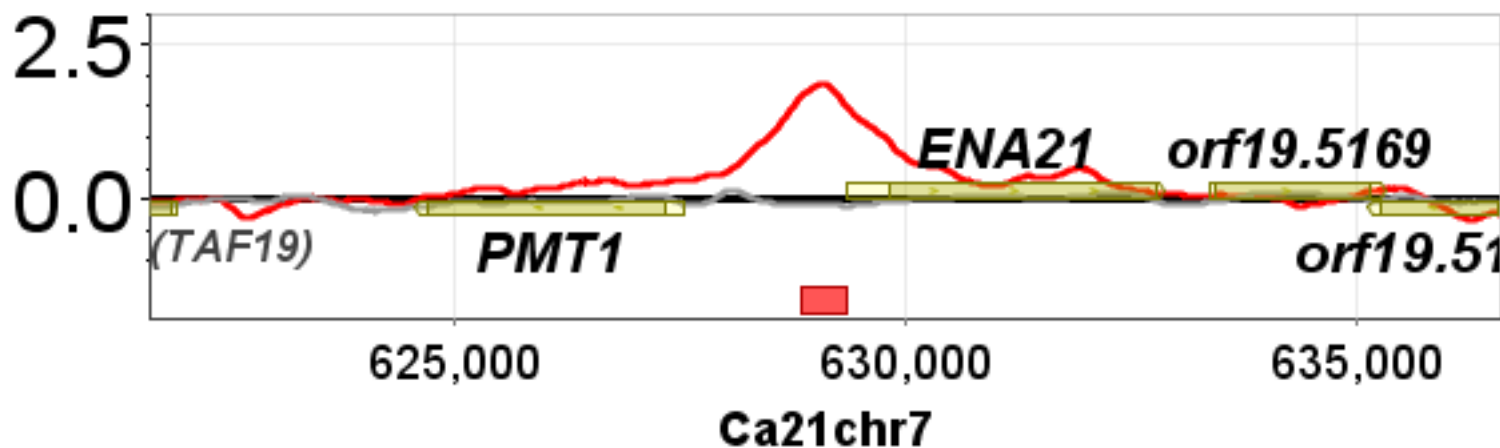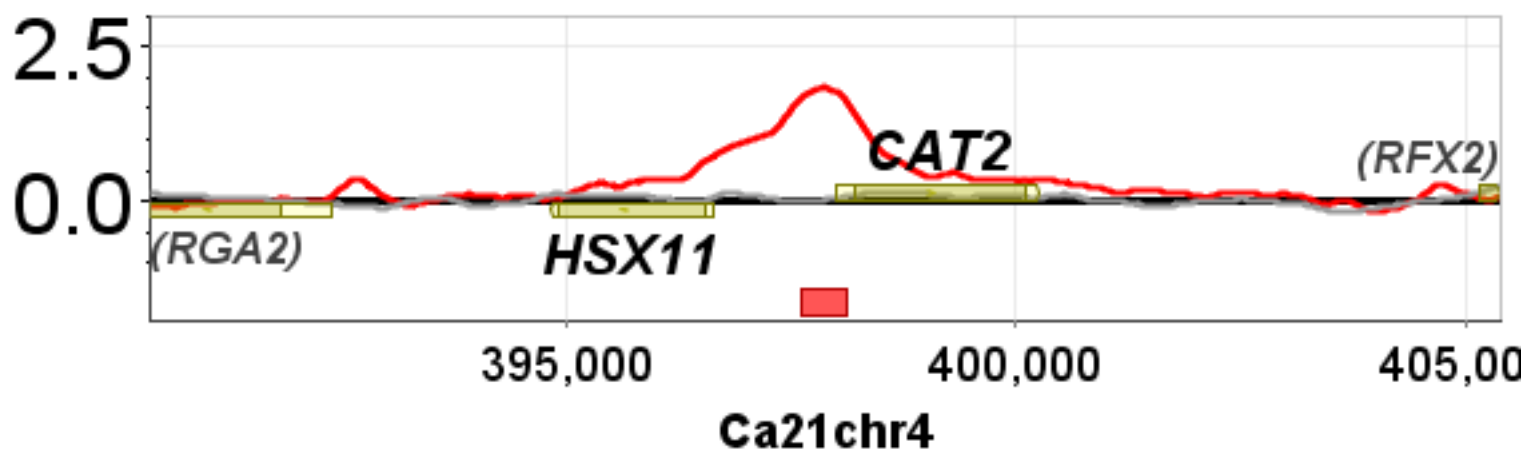



[1.854] Ca21chr5:1104950-1119949 [+] [orf19.3999, orf19.3998, ADH1, orf19.4000, ntar\_963]

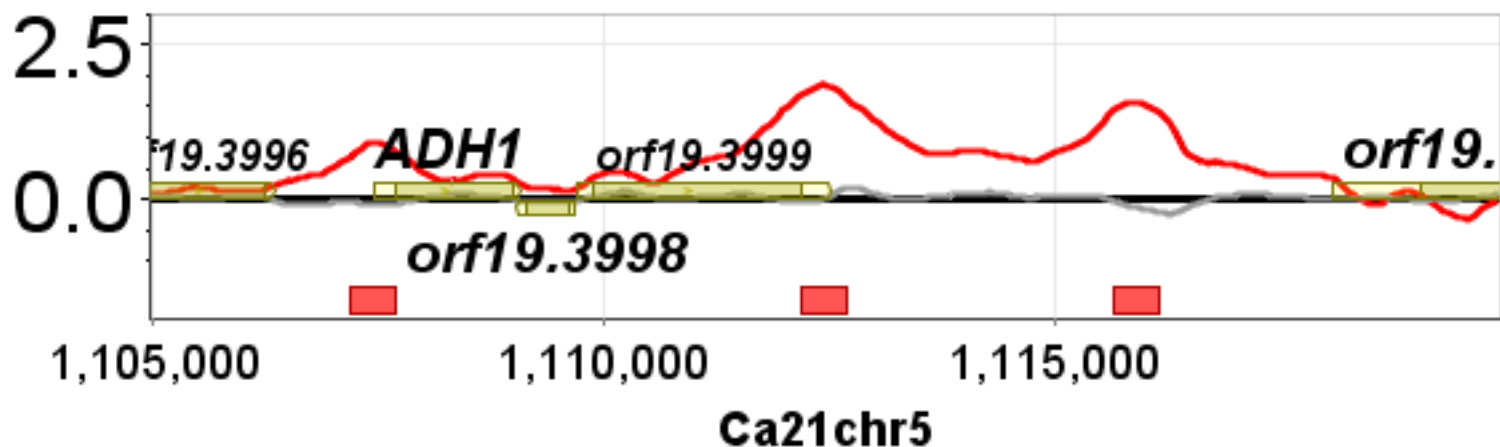

[1.852] Ca21chr2:1645676-1660675 [+] [PHM7, orf19.2169, orf19.2168.3, ntar\_438, orf19.2168]

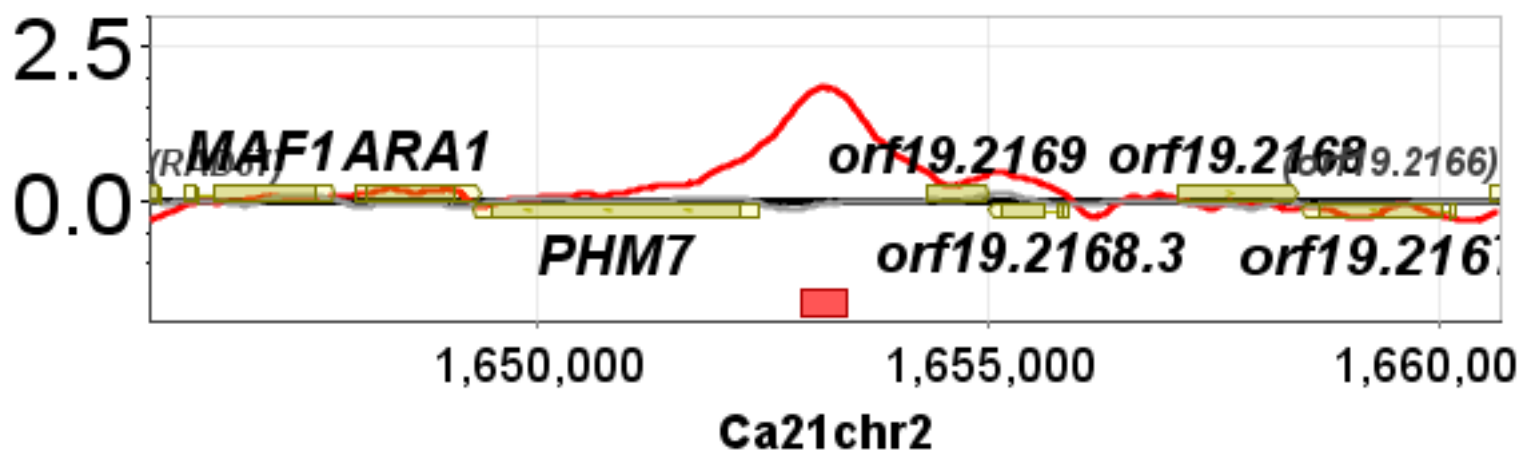

[1.835] Ca21chr3:1117150-1132149 [+] [ntar\_618, ntar\_617, RHB1, ntar\_616, ntar\_615]

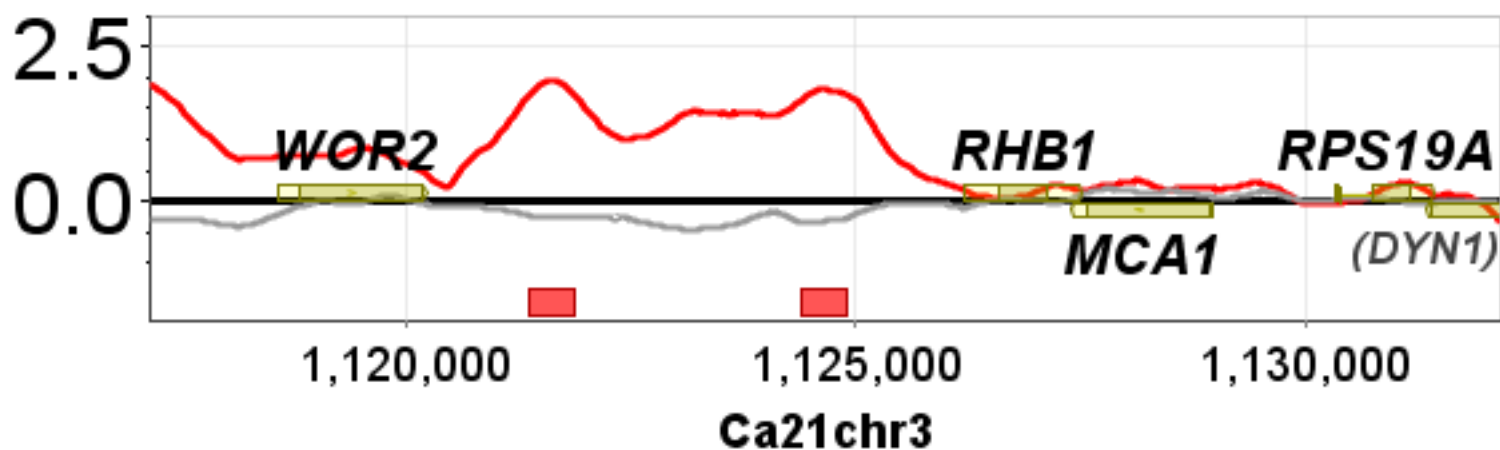

[1.807] Ca21chrR:833675-848674 [+] [ntar\_1252, RPS30, orf19.4376, orf19.4375, PRP42]

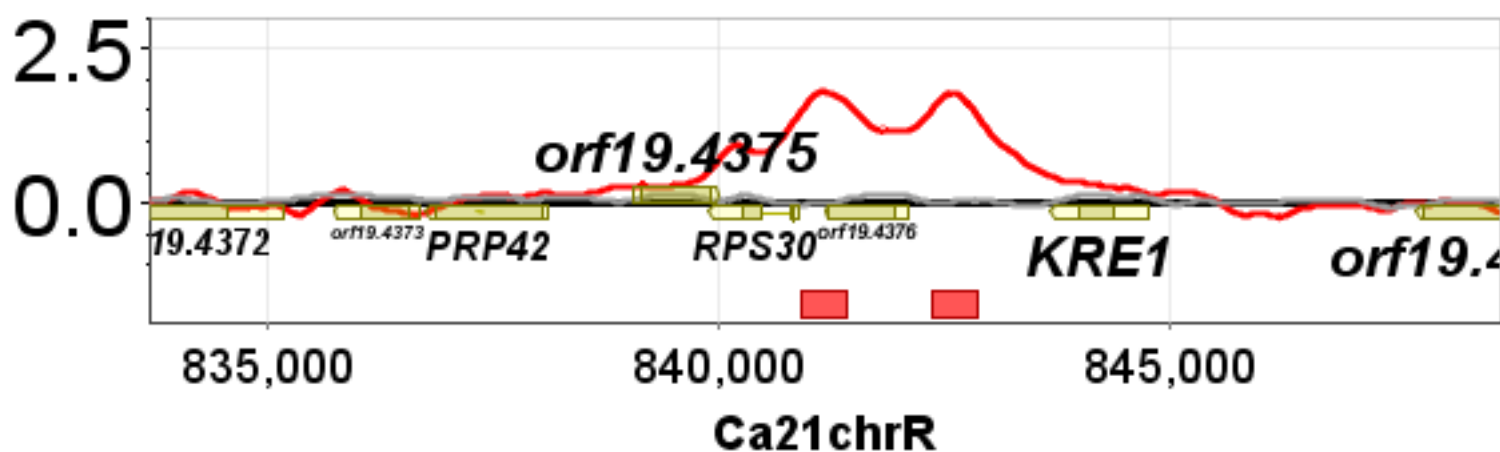

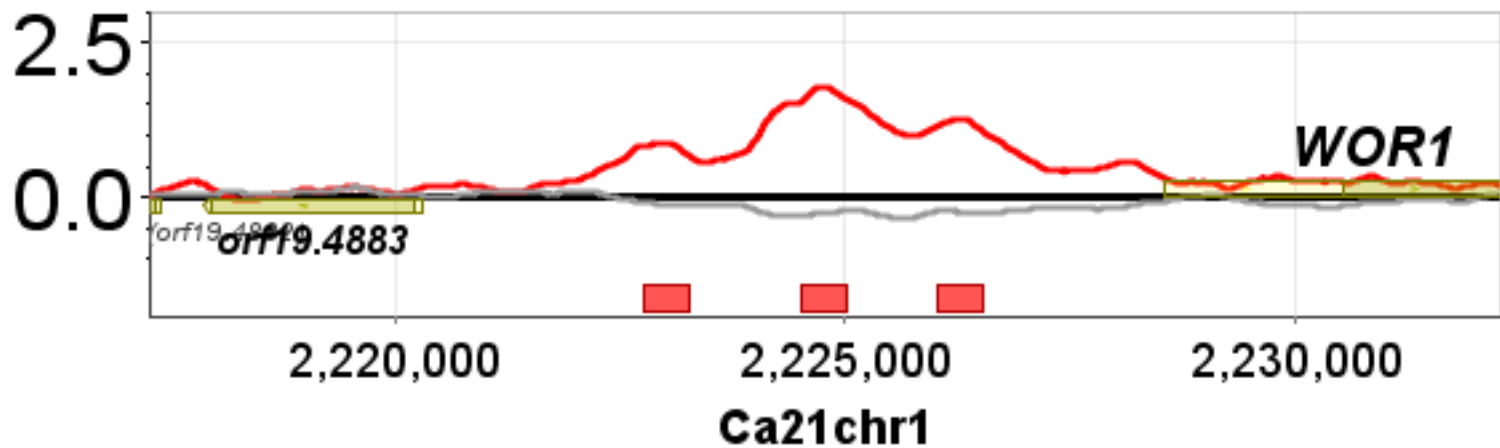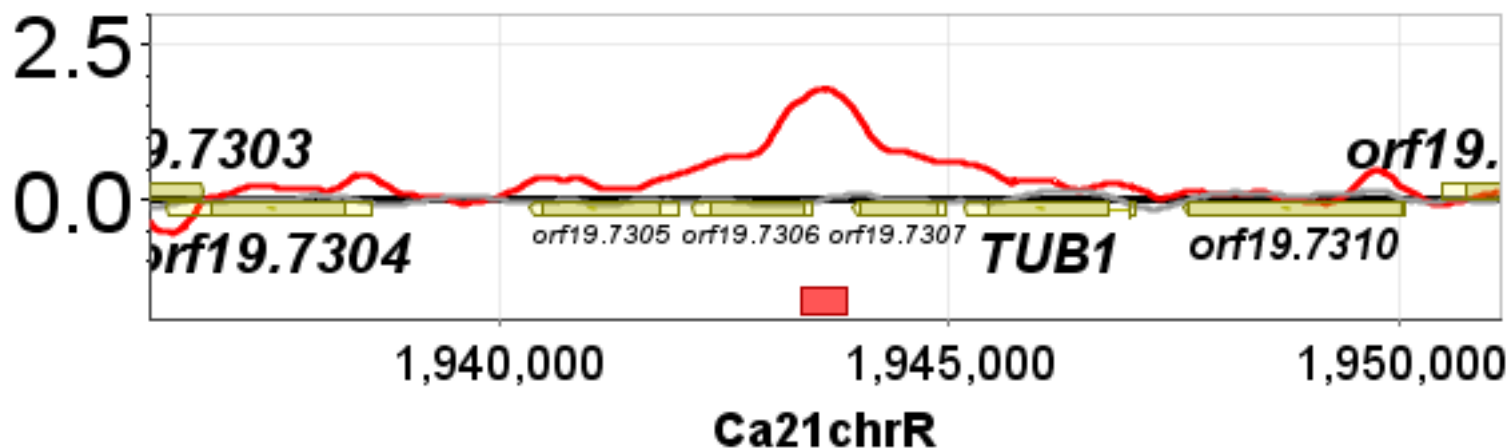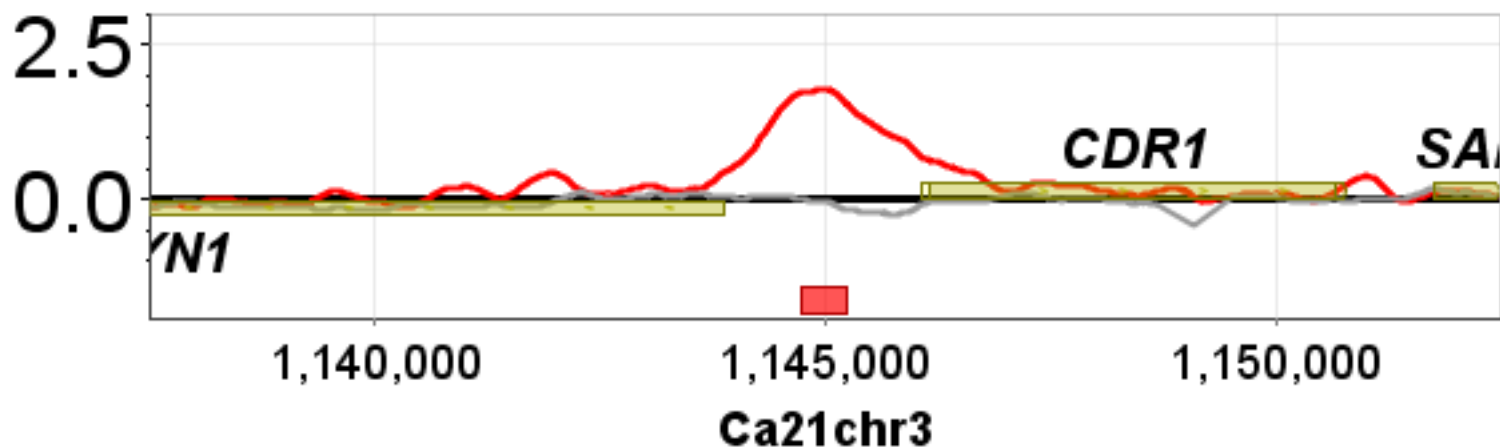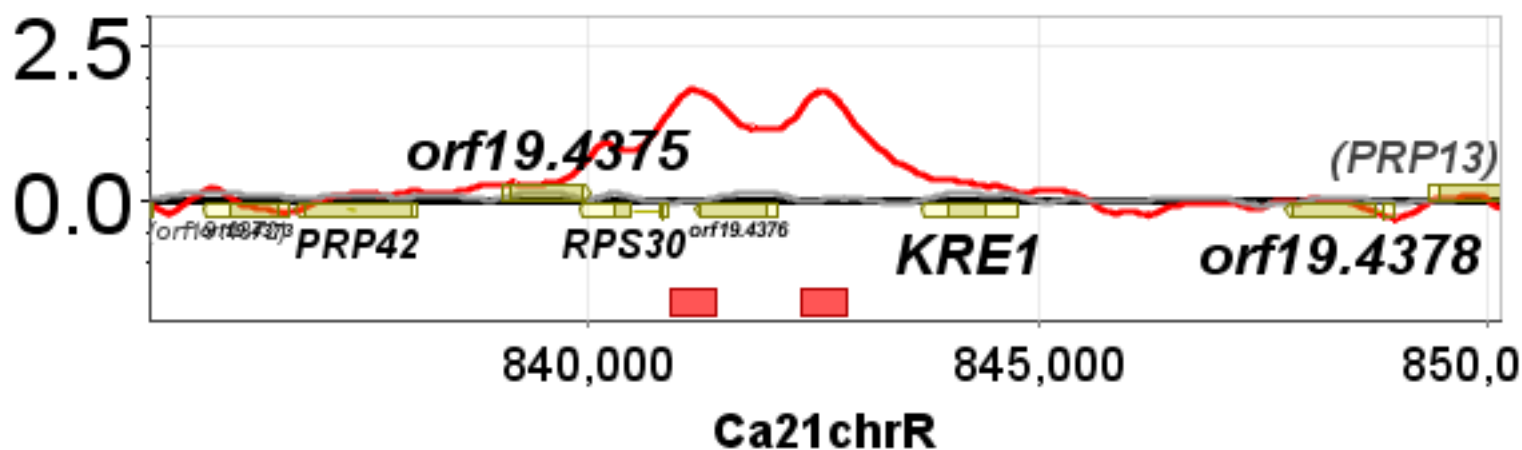

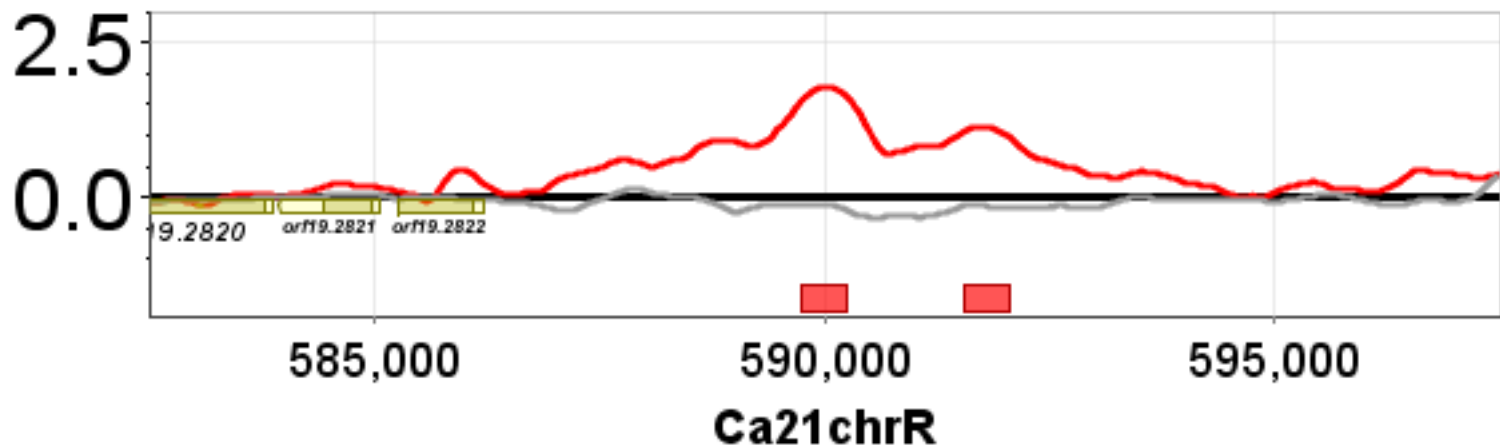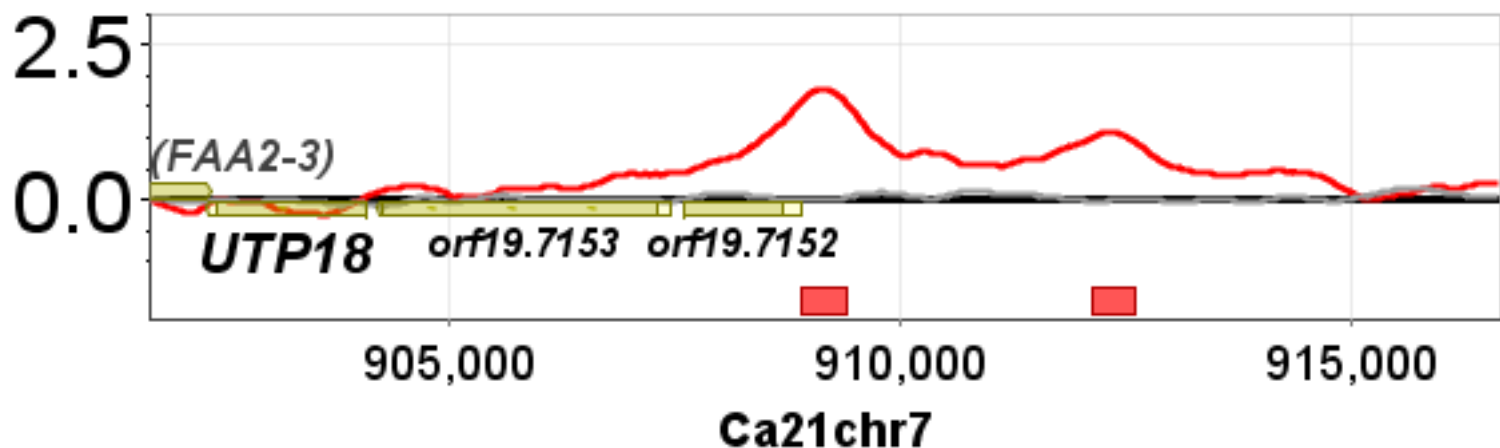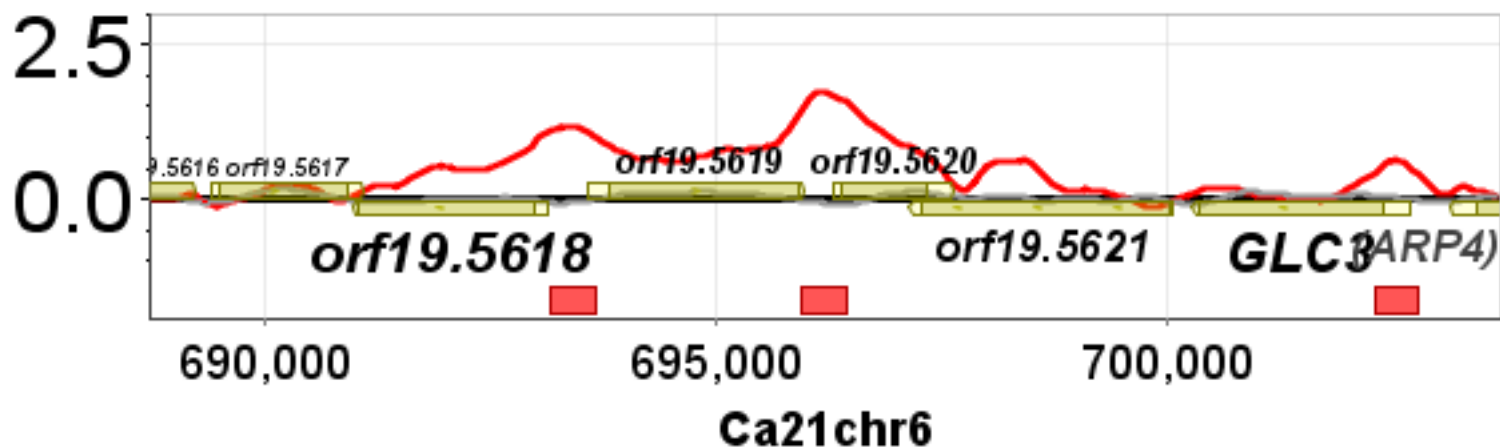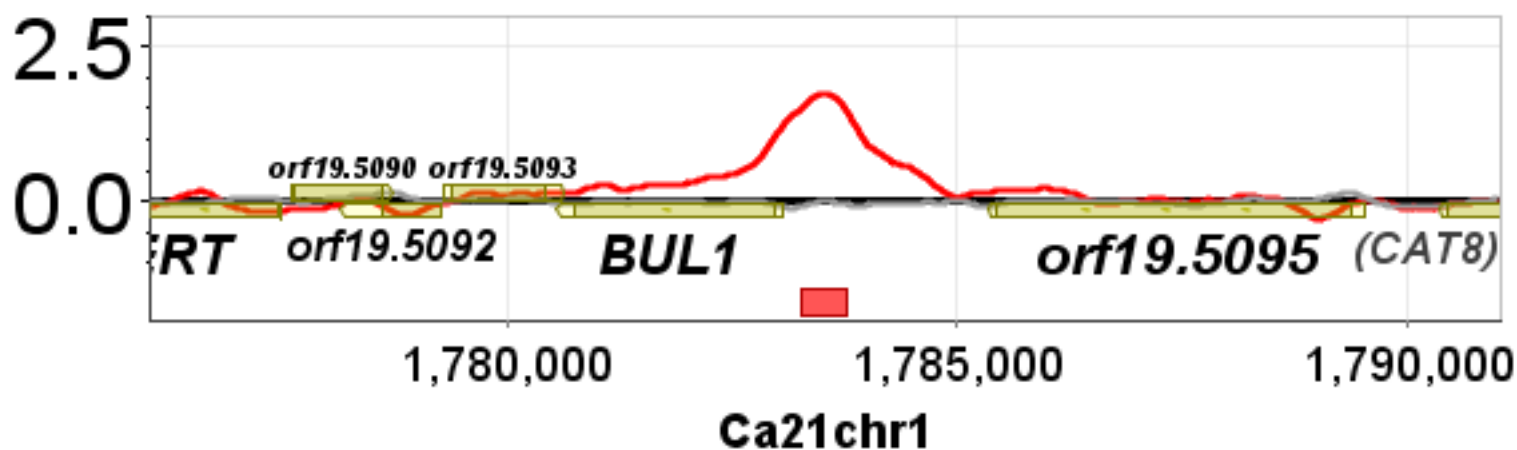

[1.697] Ca21chr3:1559319-1574318 [+] [FCR1, ntar\_663, tw(cca)2, orf19.6818, orf19.6816]

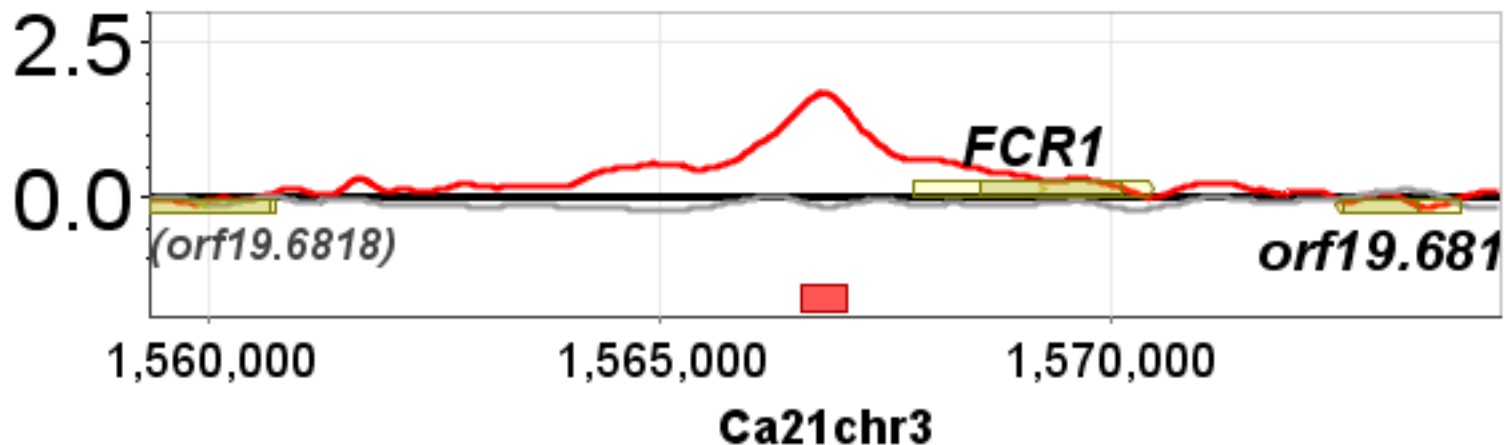

[1.696] Ca21chr1:398254-413253 [+] [ntar\_36, HGT1, ntar\_37, ntar\_35, orf19.4528]

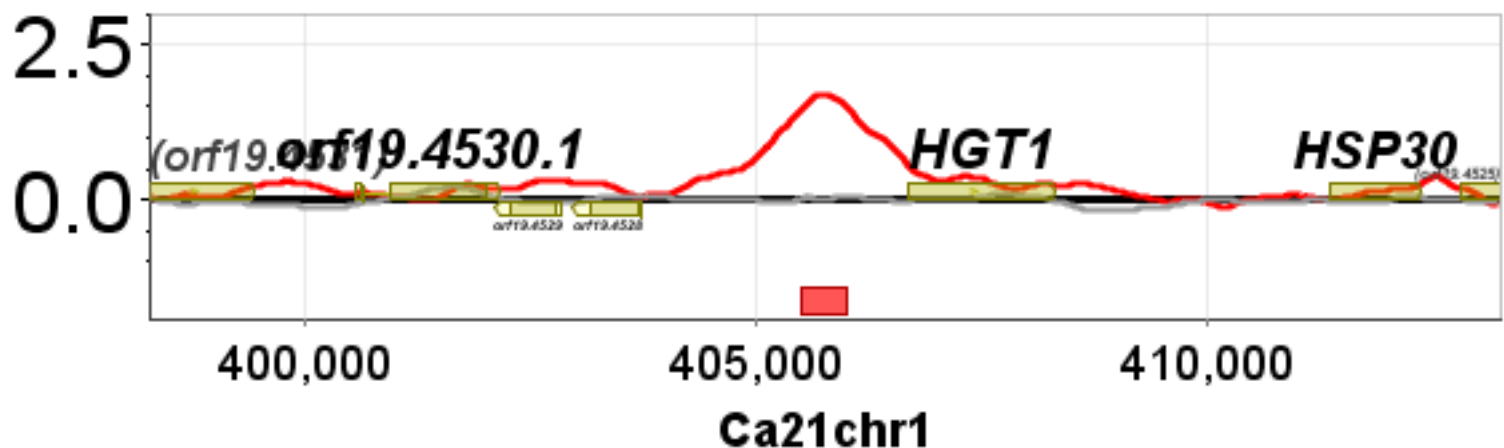

[1.668] Ca21chr2:1734826-1749825 [+] [ntar\_446, ntar\_447, ntar\_445, ntar\_448, ntar\_450]

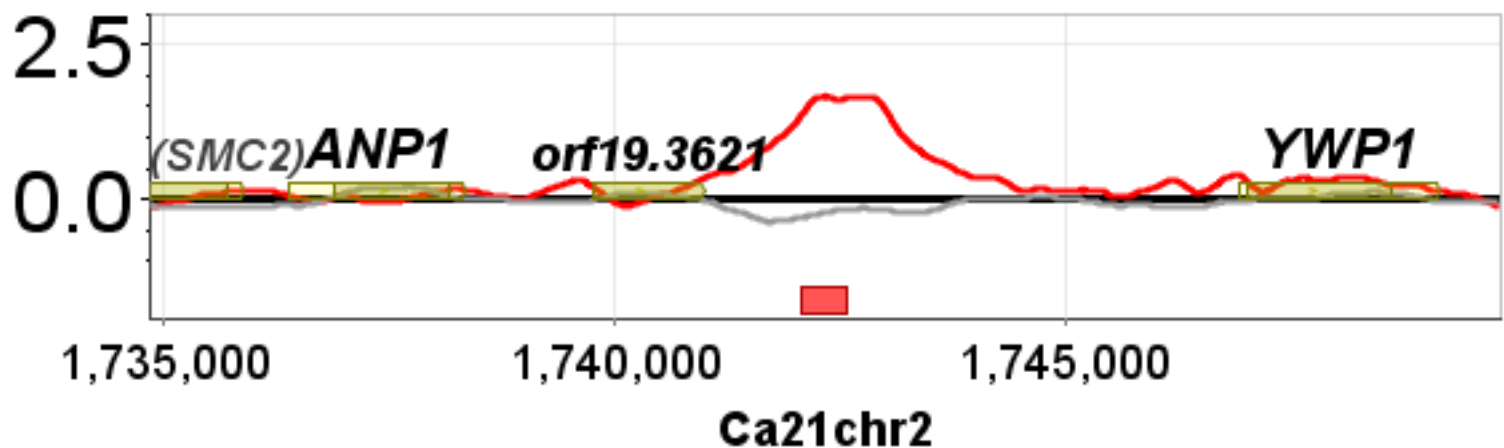

[1.66] Ca21chr2:1330771-1345770 [+] [ntar\_406, orf19.34, orf19.35, ntar\_405, ntar\_404]

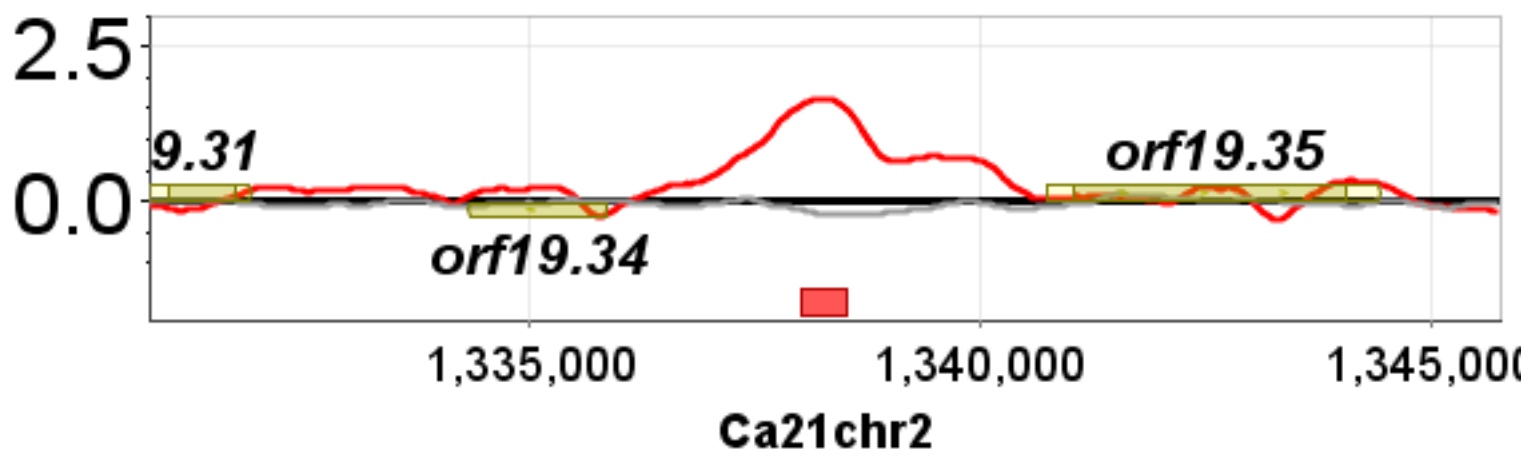

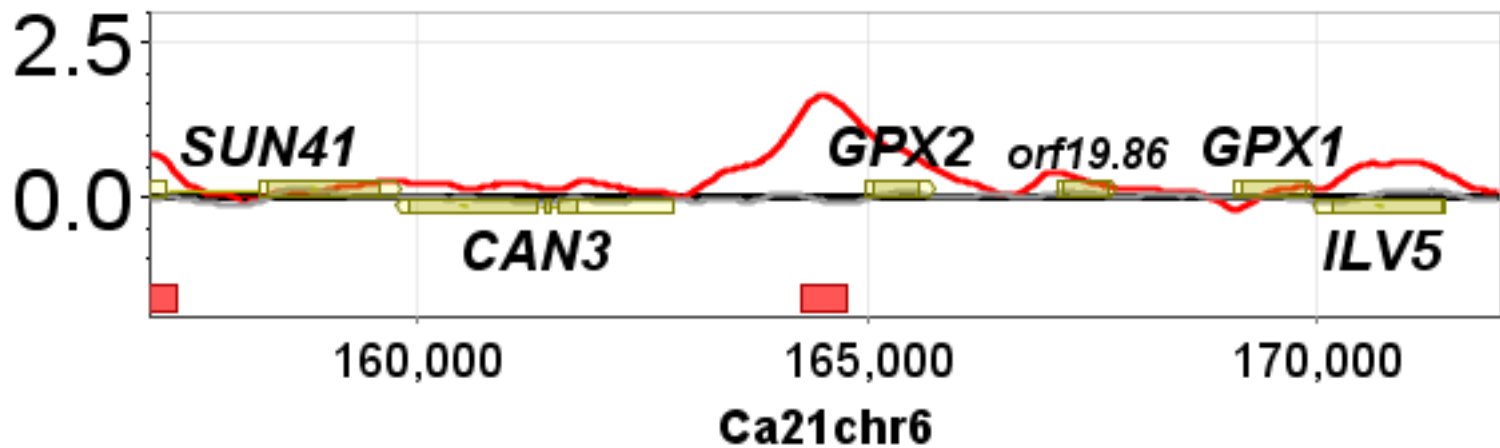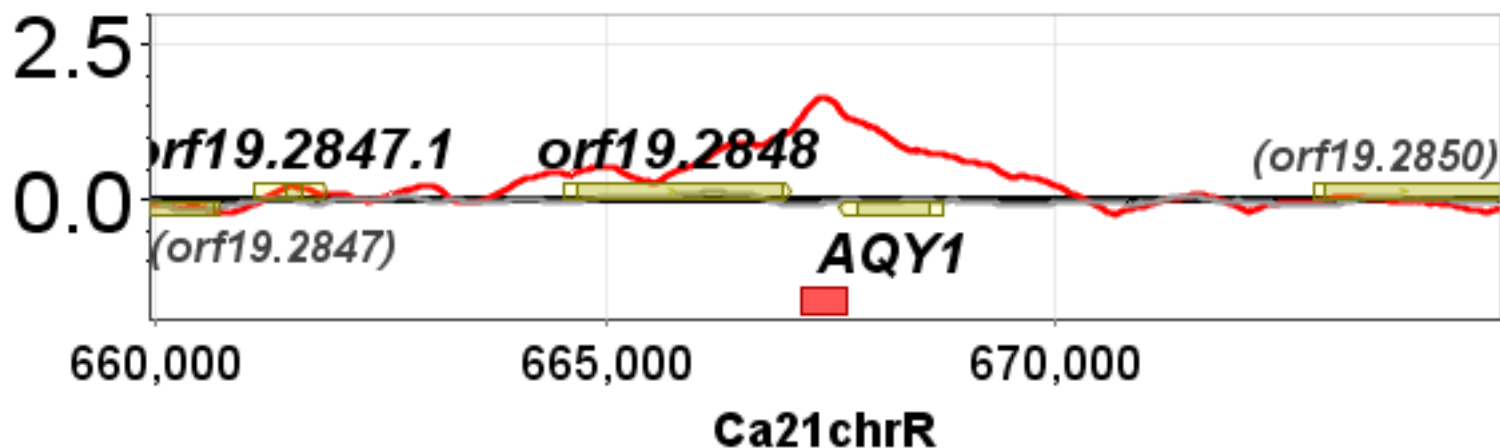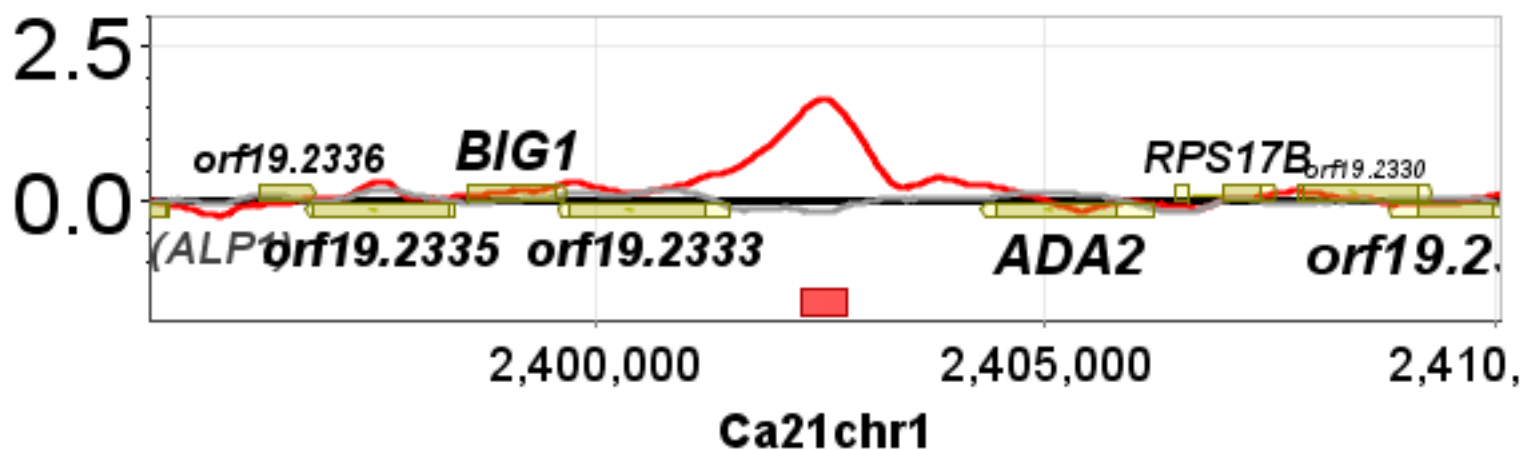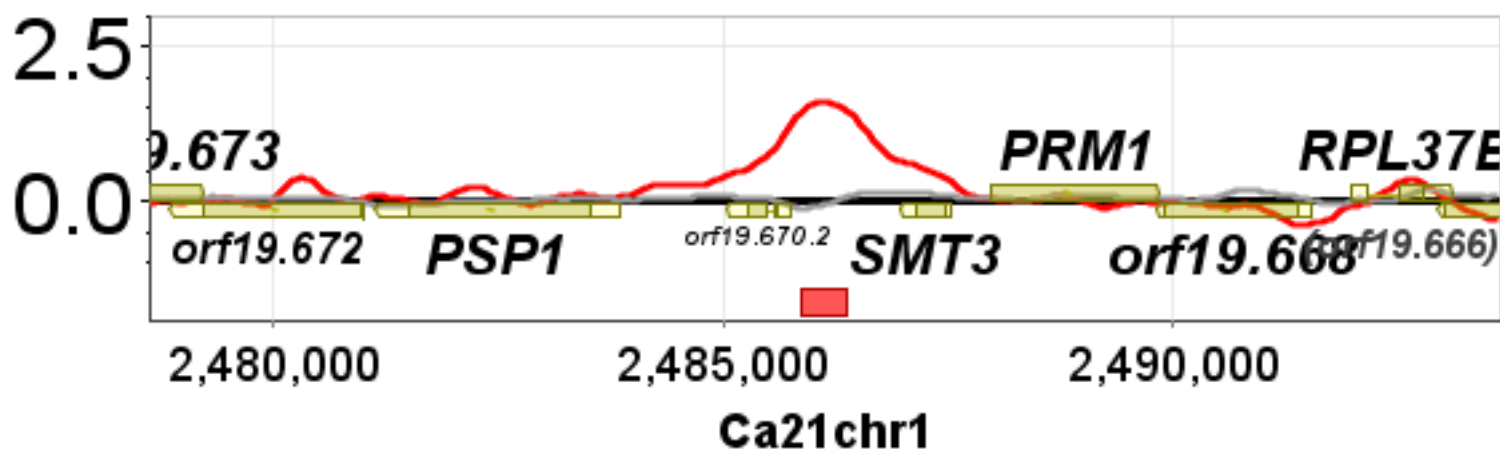

[1.597] Ca21chr3:1246727-1261726 [+] [orf19.6996, orf19.6995, BAT22, orf19.6997, GTT1]

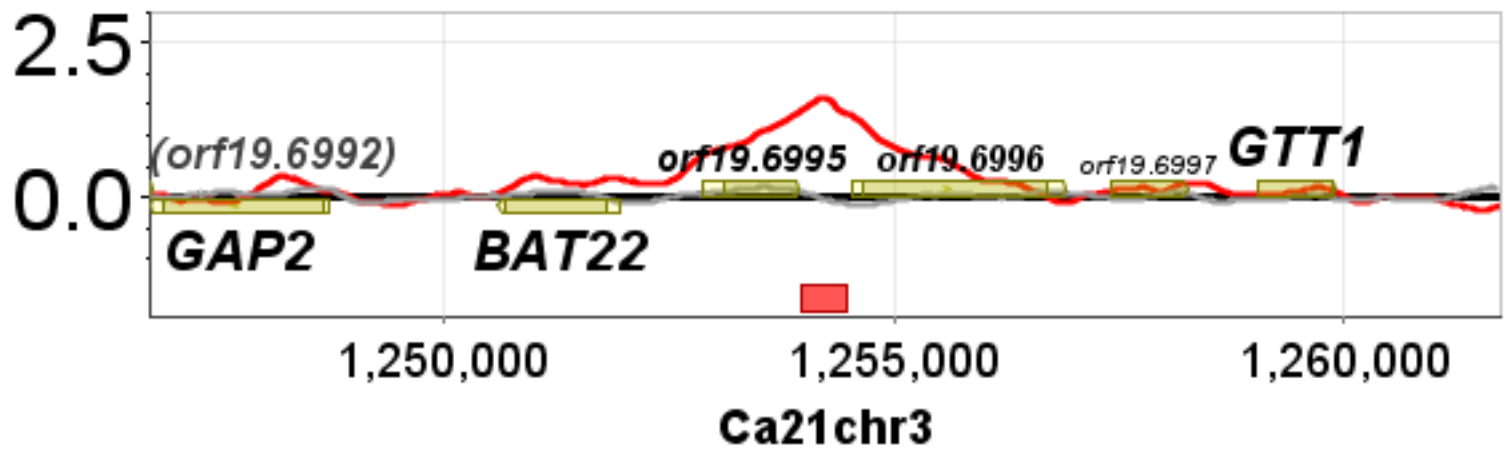

[1.579] Ca21chr5:1108422-1123421 [+] [orf19.4000, orf19.4001, orf19.3999, orf19.3998, ADH1]

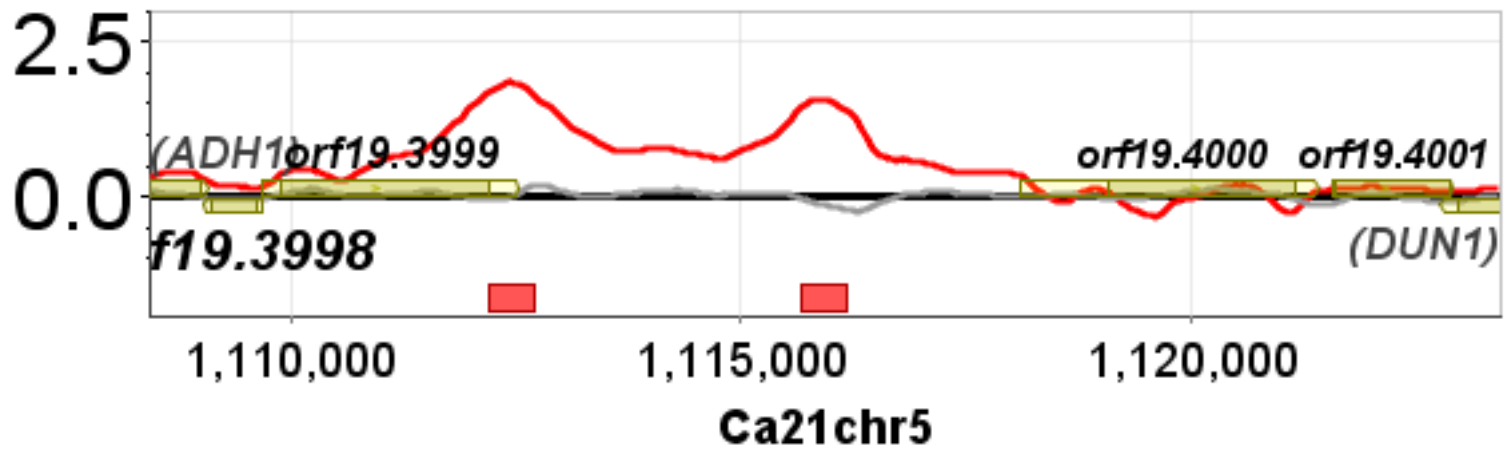

[1.574] Ca21chr2:424052-439051 [+] [orf19.1536, orf19.1535, ntar\_327, orf19.1534, TLG2]

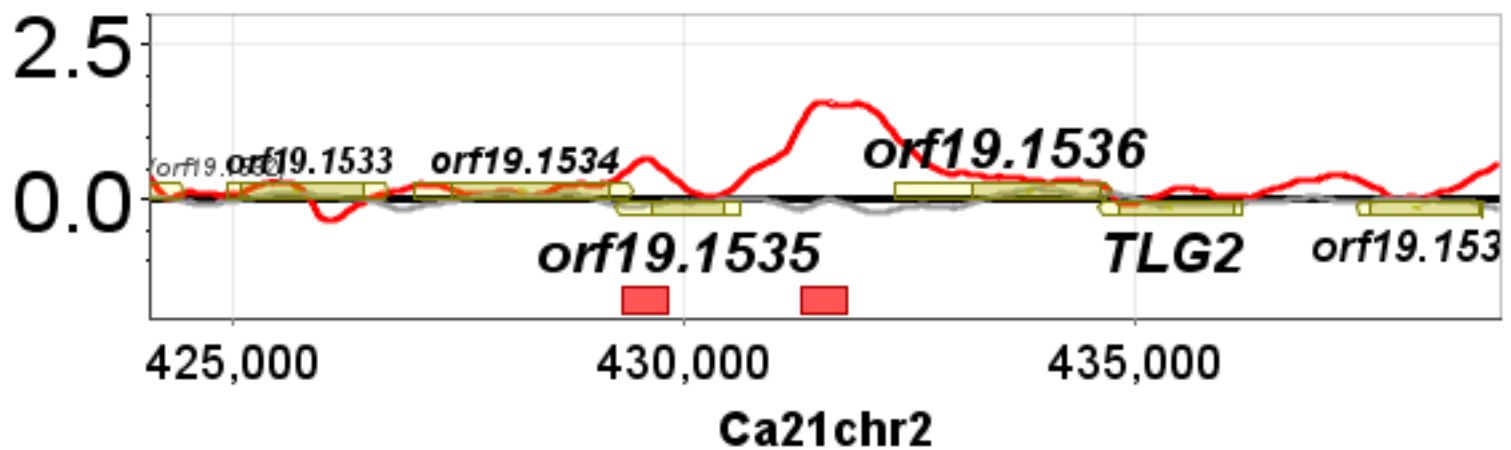

[1.573] Ca21chr5:108993-123992 [+] [AGA1, orf19.934, orf19.933]

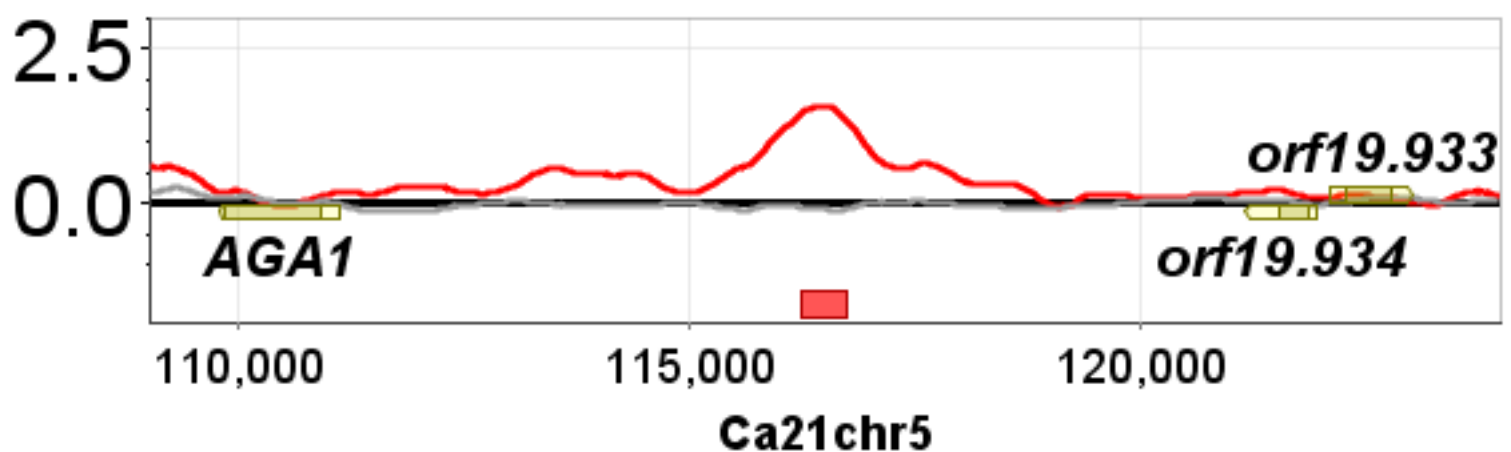

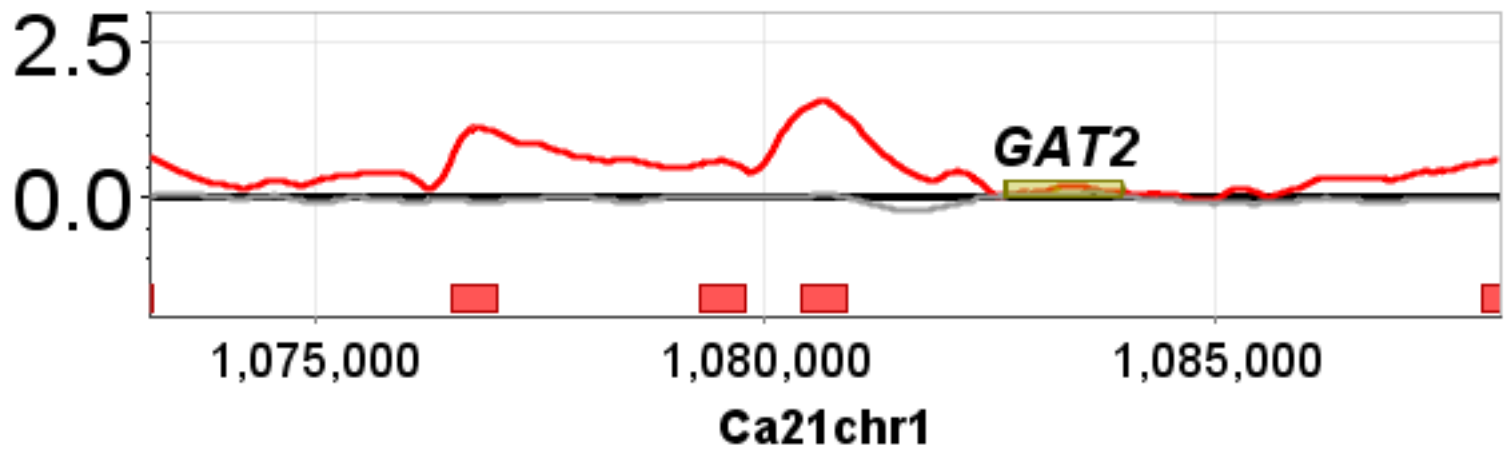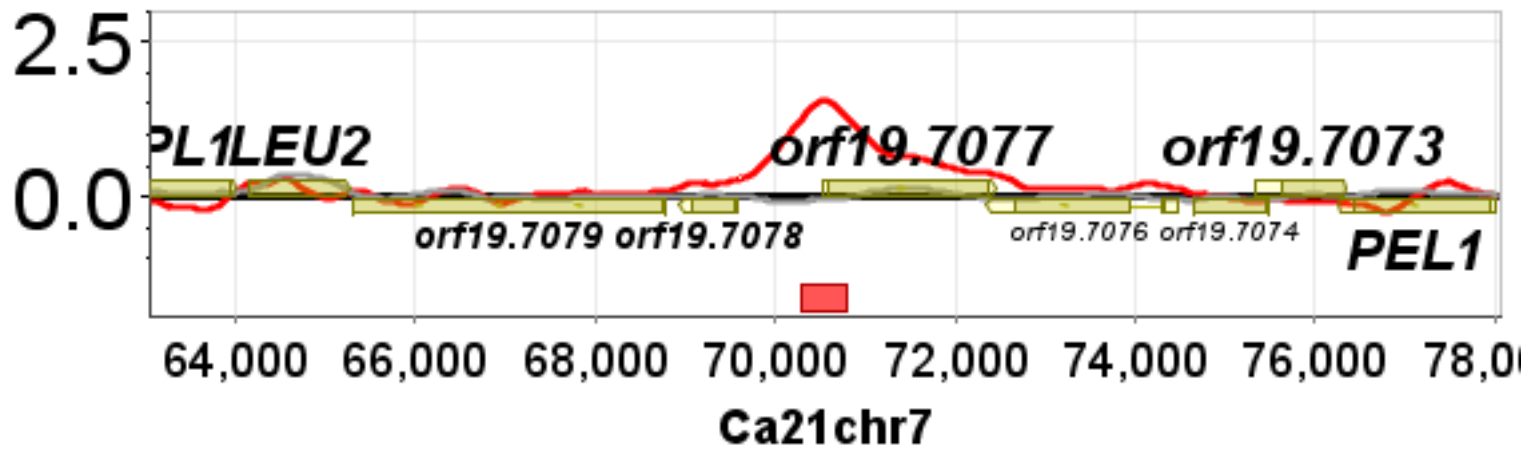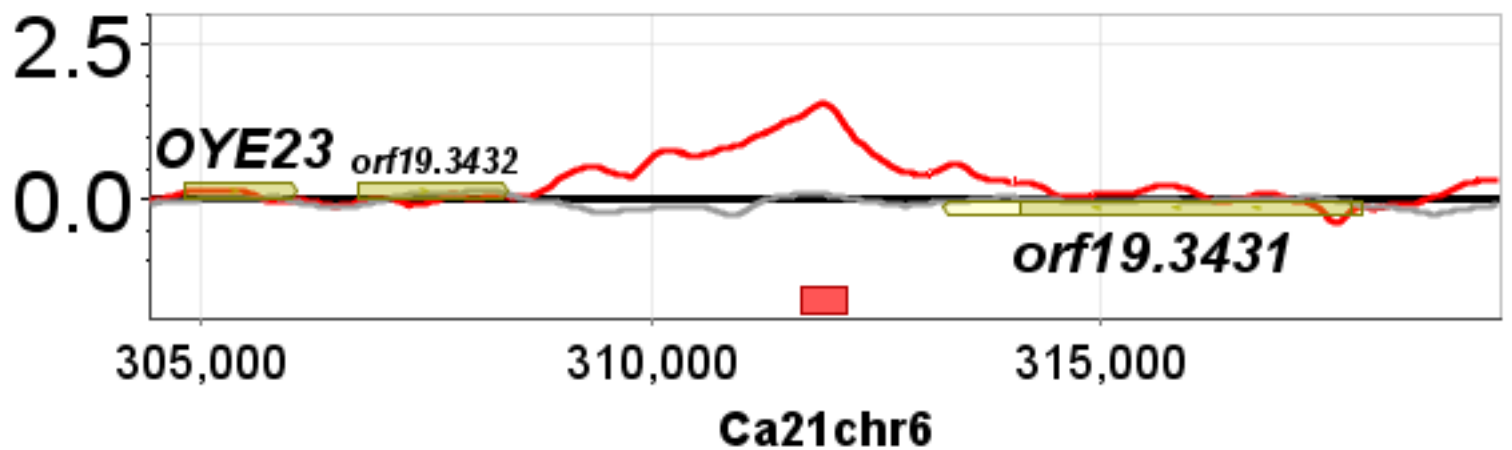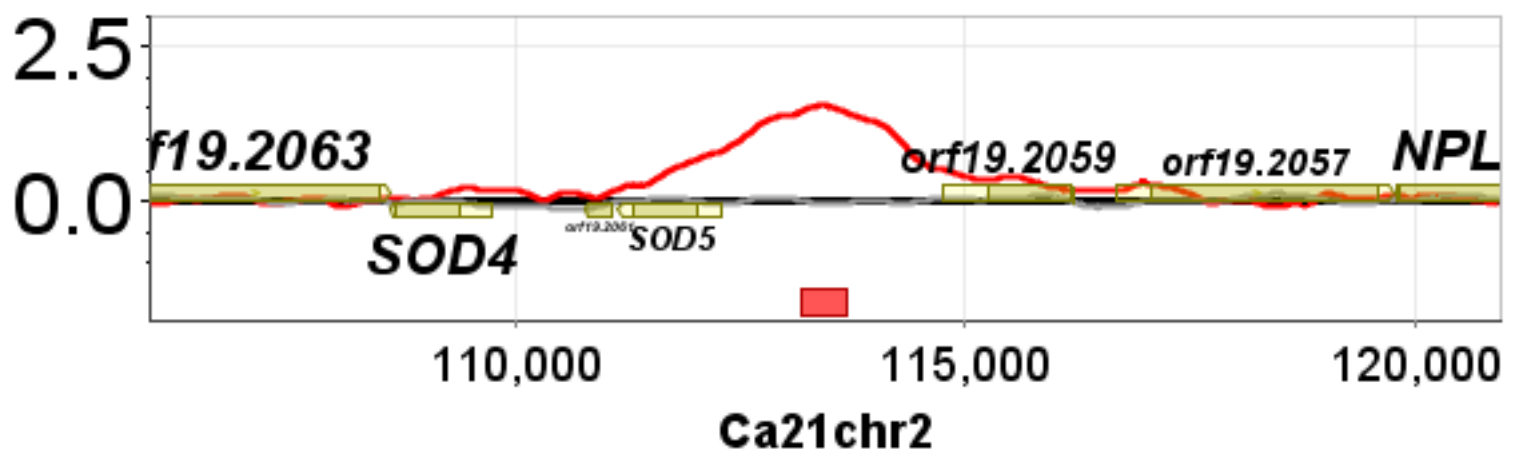

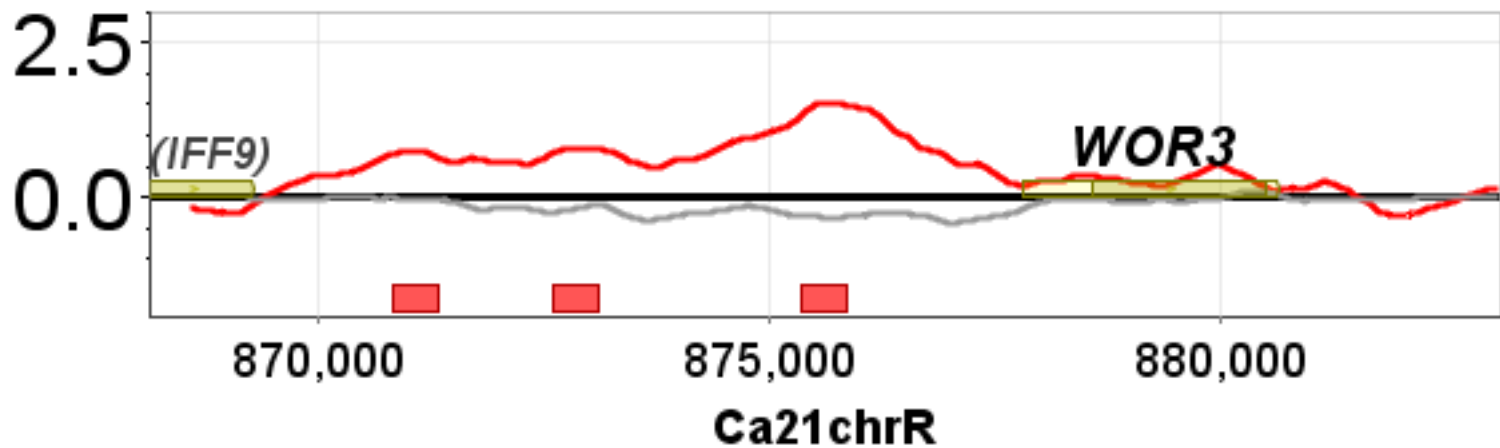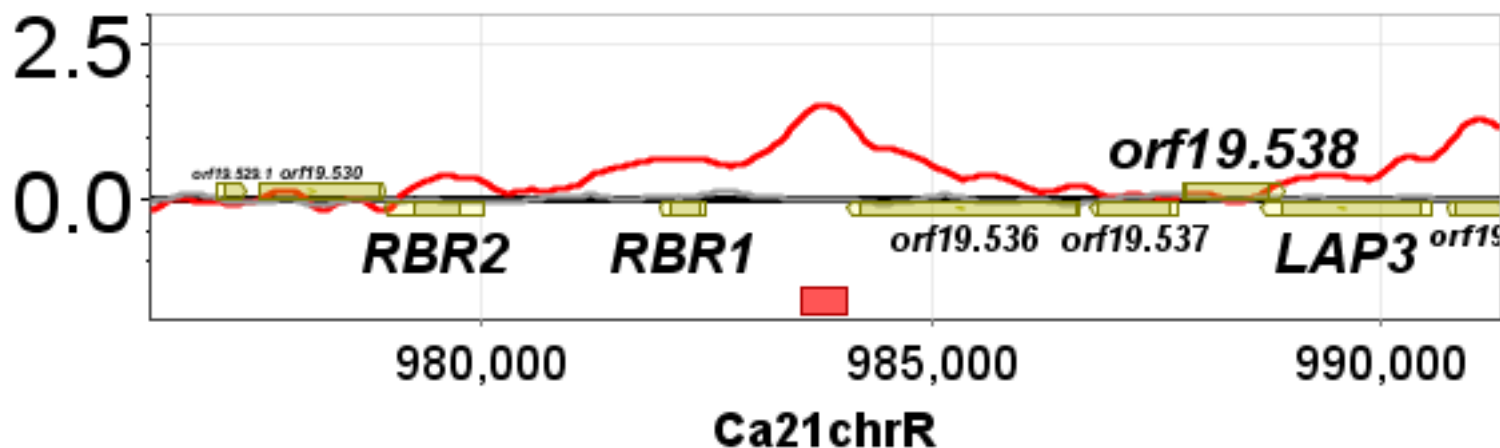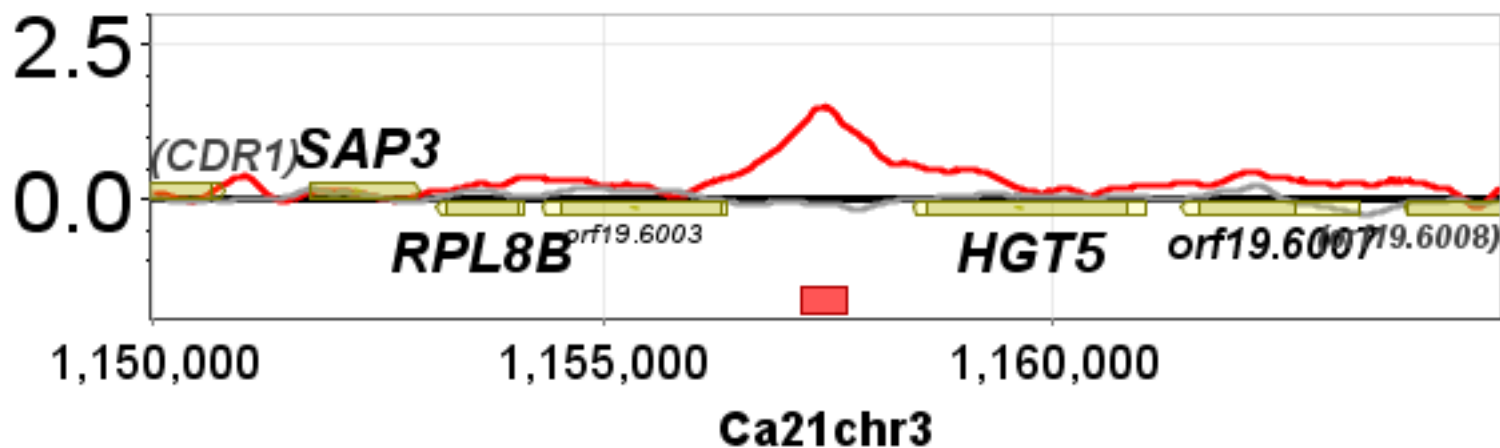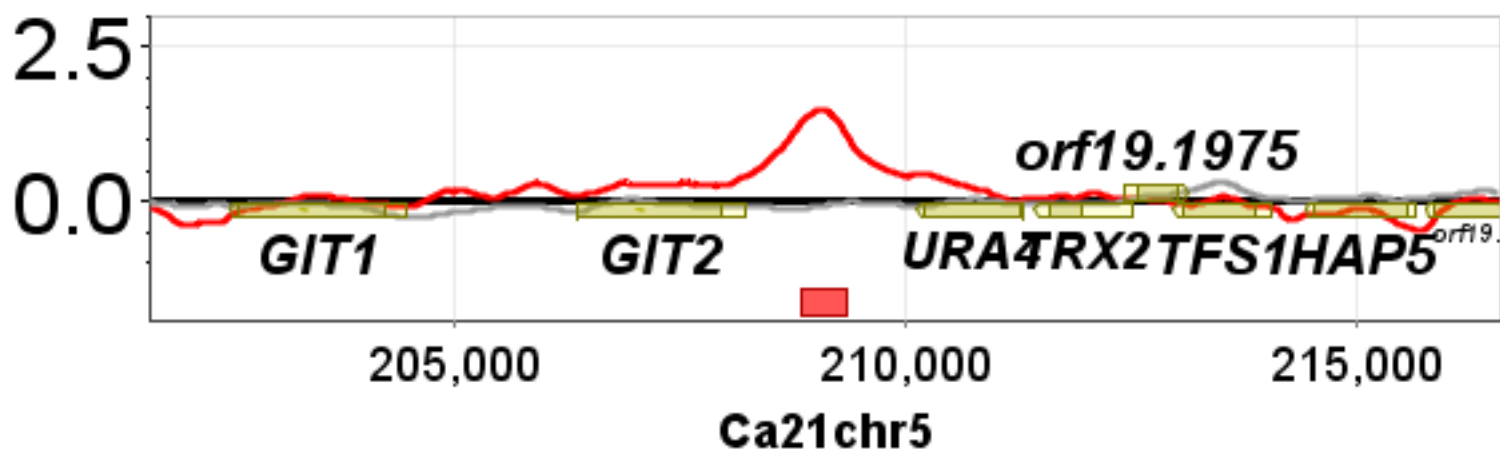



[1.476] Ca21chr1:1517910-1532909 [+] [GAP4, orf19.4455, TAF145, RIA1]

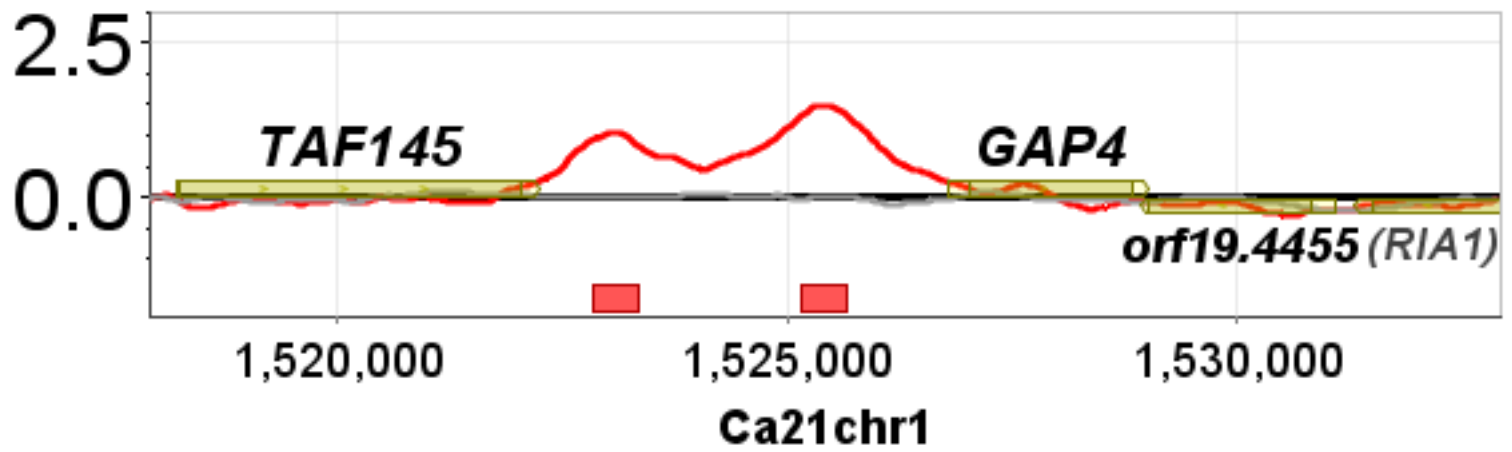

[1.465] Ca21chr2:773697-788696 [+] [orf19.850, orf19.851, orf19.849, SAP98, SAP99]

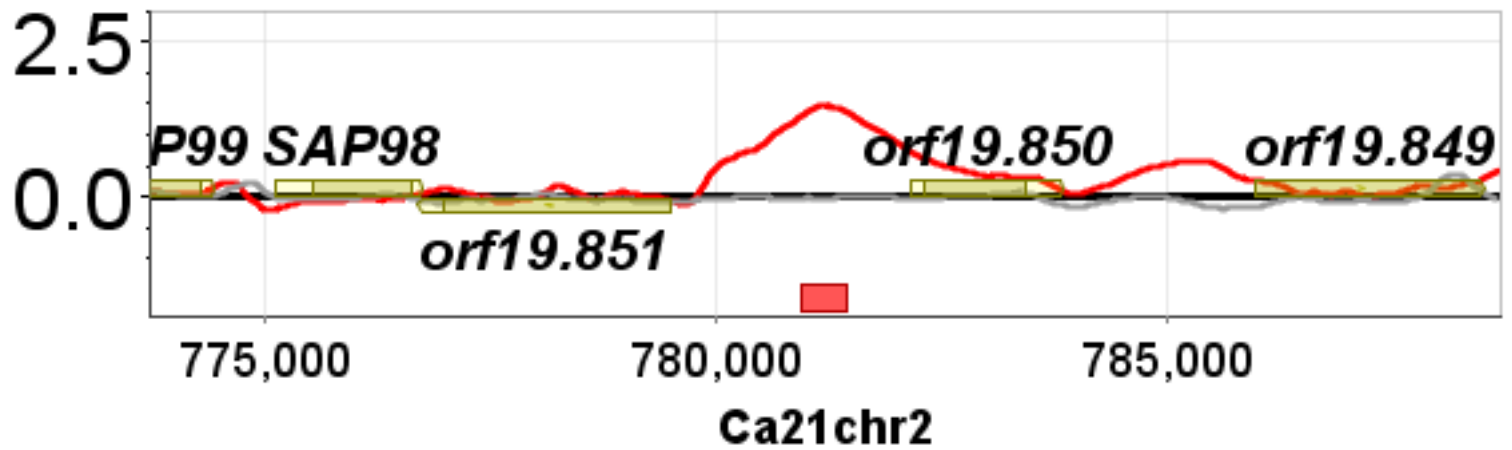

[1.452] Ca21chr1:2714356-2729355 [+] [ntar\_251, orf19.3767, orf19.68.2, orf19.69, orf19.69.2]

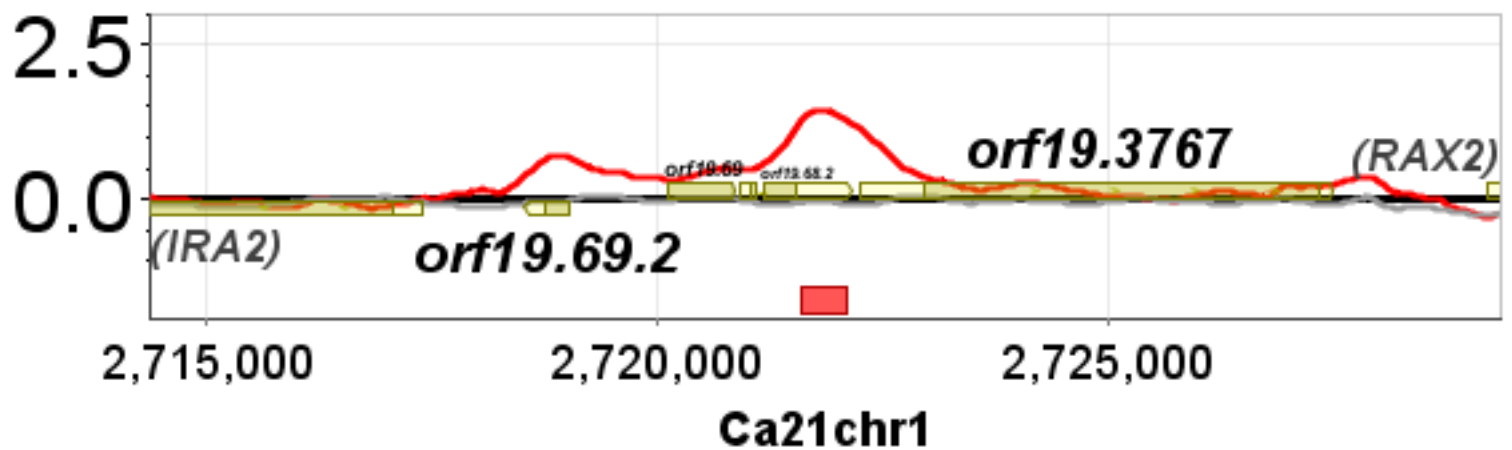

[1.449] Ca21chr1:2790047-2805046 [+] [orf19.4914, orf19.4913, orf19.4914.1, ntar\_253, orf19.4916]

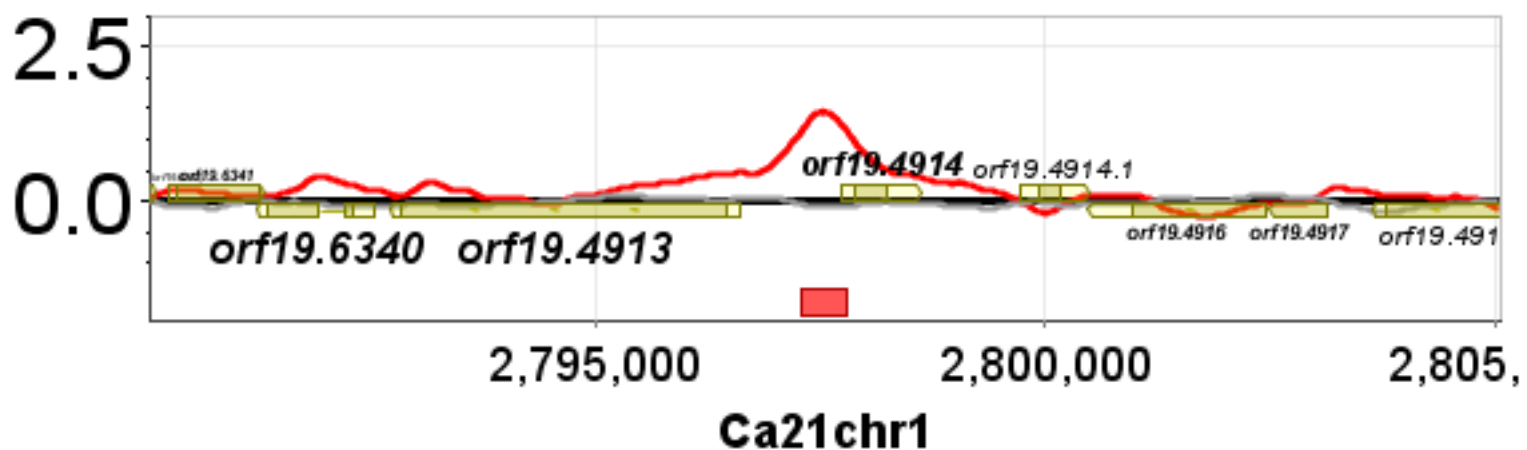

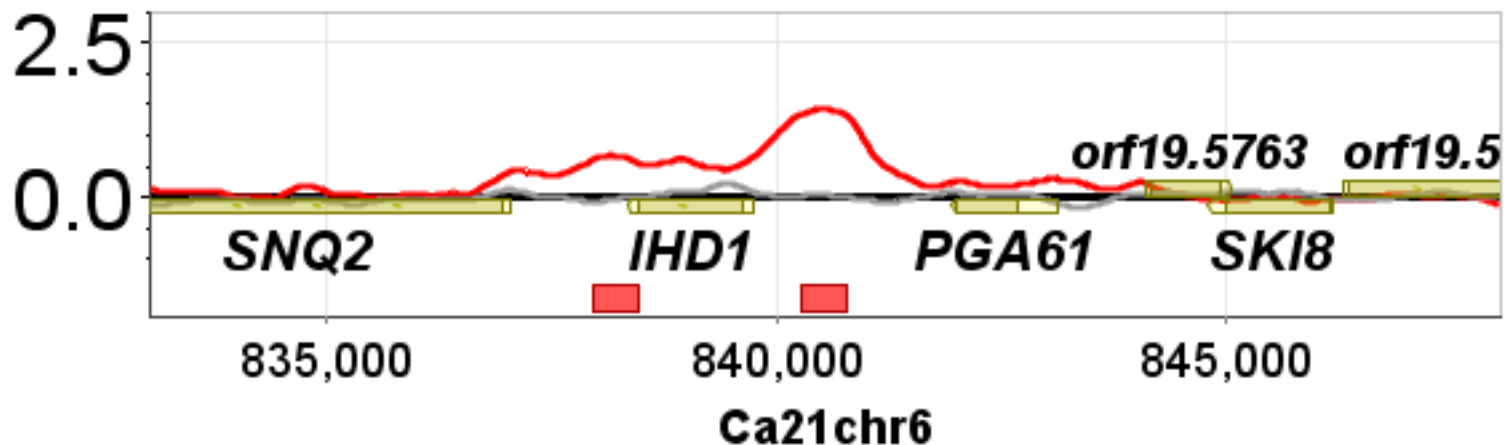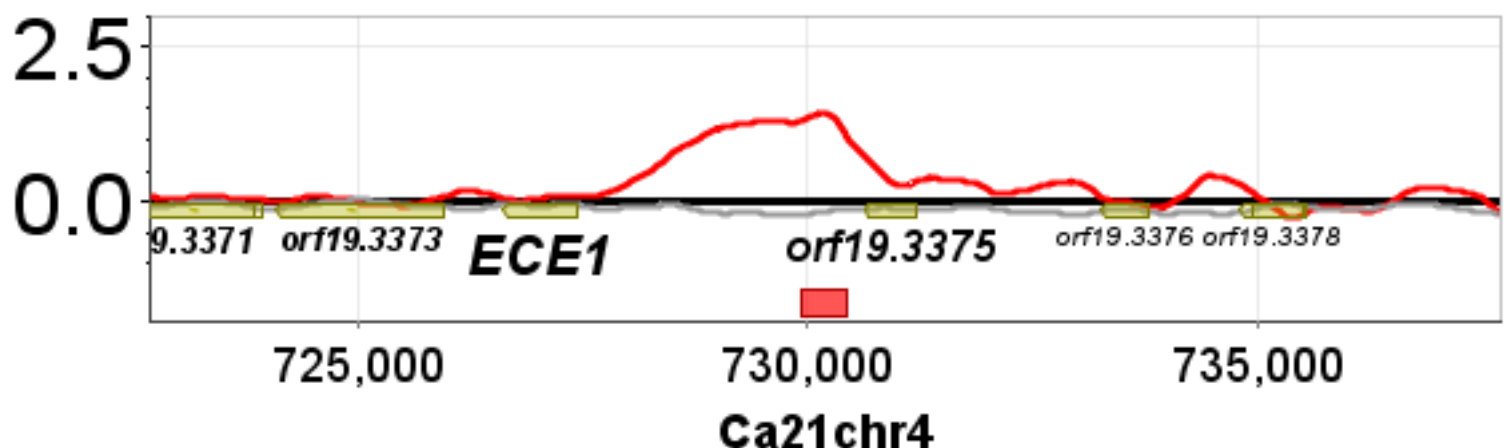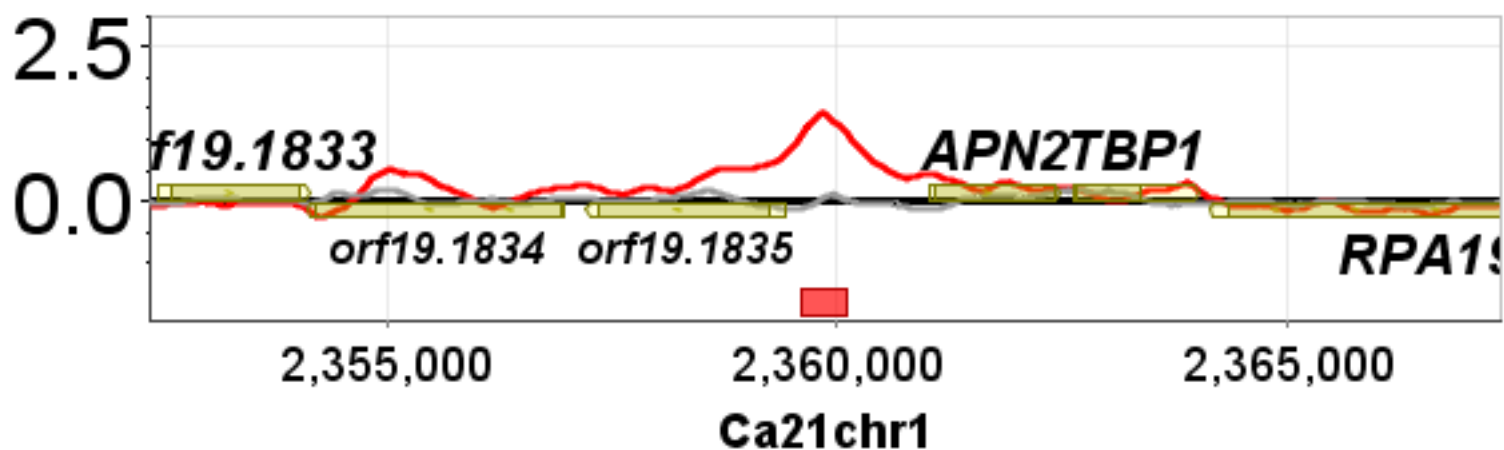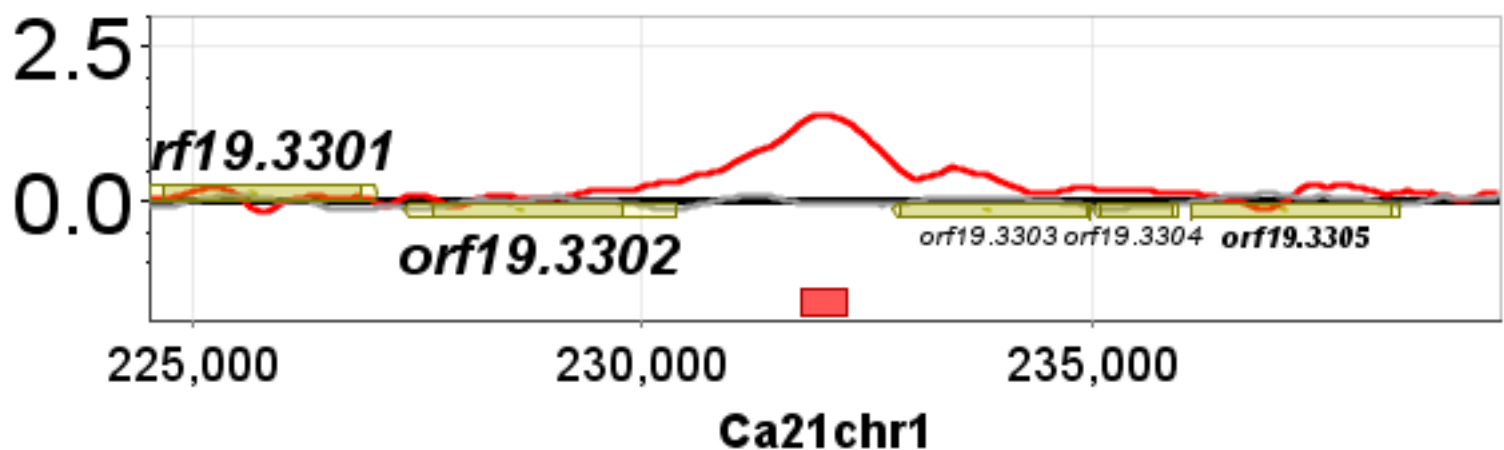

[1.388] Ca21chr1:2300071-2315070 [+] [orf19.4912, ntar\_215, PHO8, orf19.4911, orf19.985]

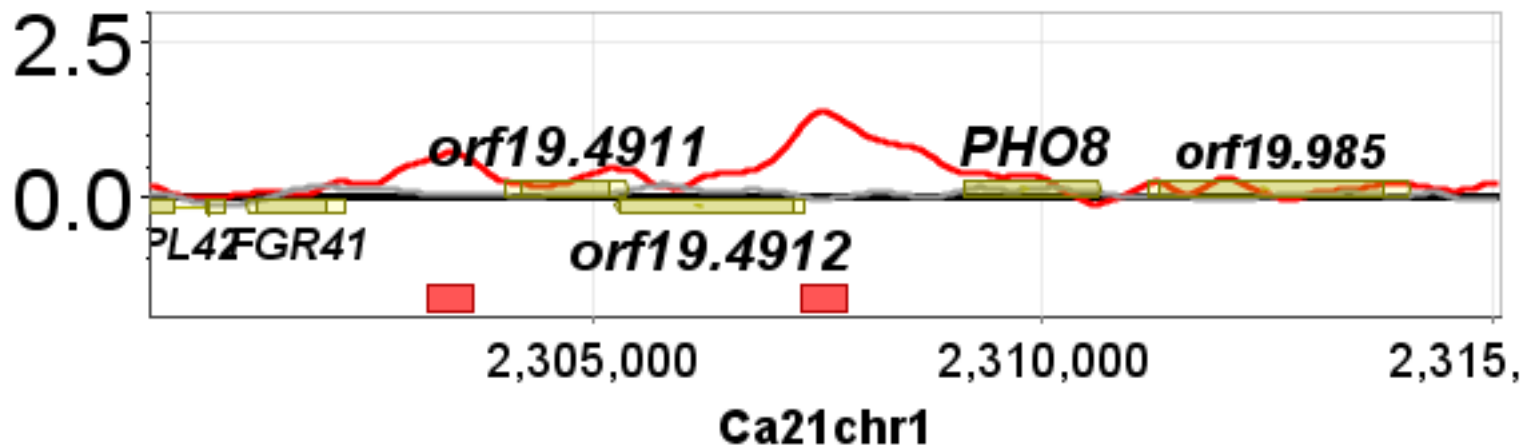

[1.383] Ca21chr4:331949-346948 [+] [ntar\_745, ntar\_744, NHP6A, orf19.4623, HRT2]

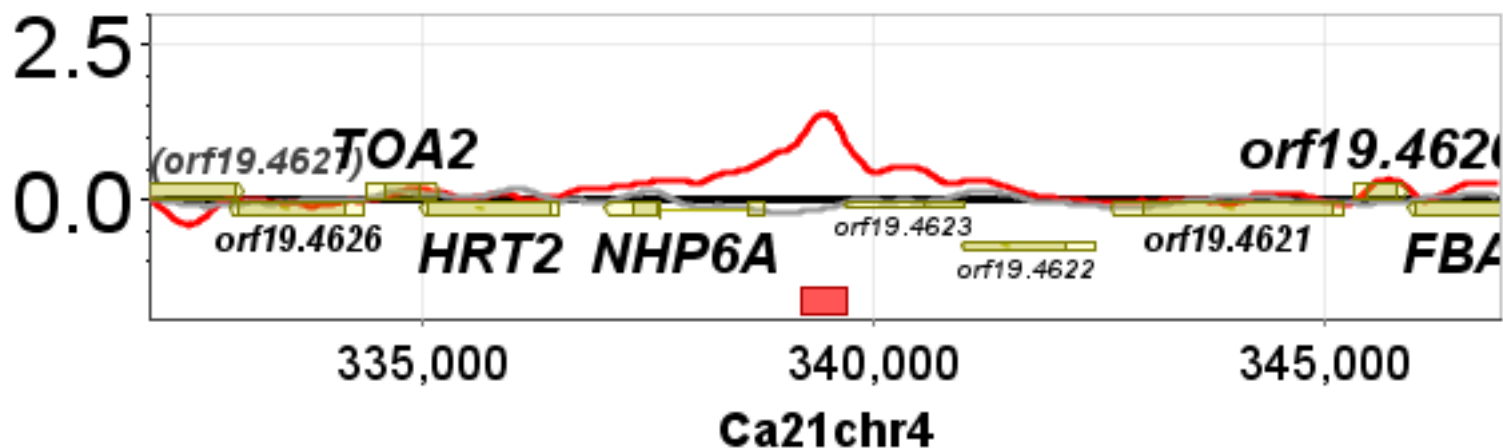

[1.378] Ca21chr2:1371187-1386186 [+] [ntar\_421, ntar\_422, LSP1, GRE2, ntar\_420]

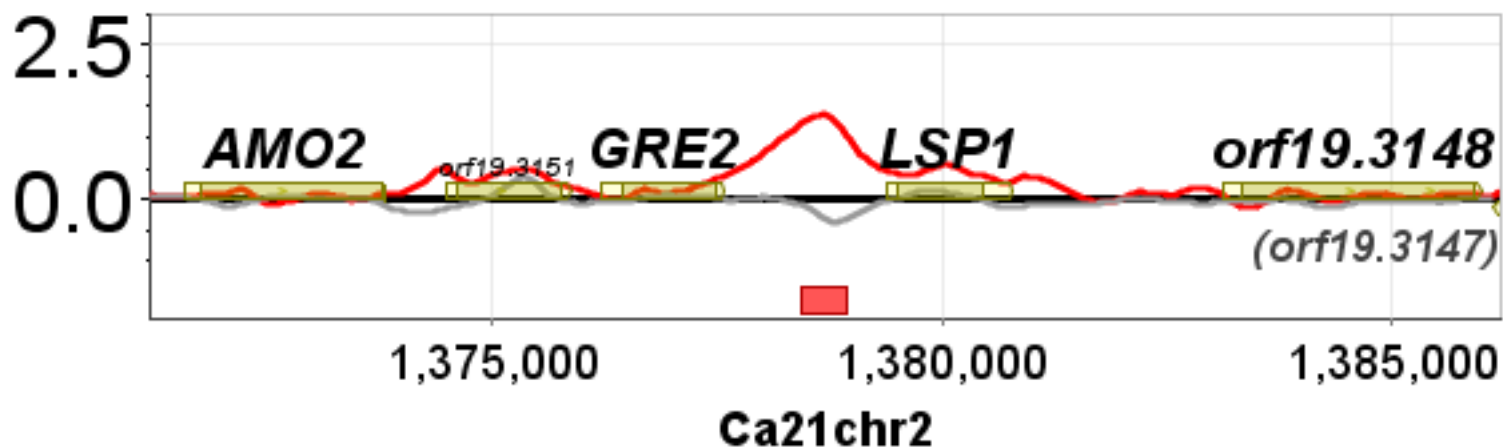

[1.376] Ca21chr4:274624-289623 [+] [ntar\_737, ntar\_736, ntar\_738, orf19.4649, ILV6]

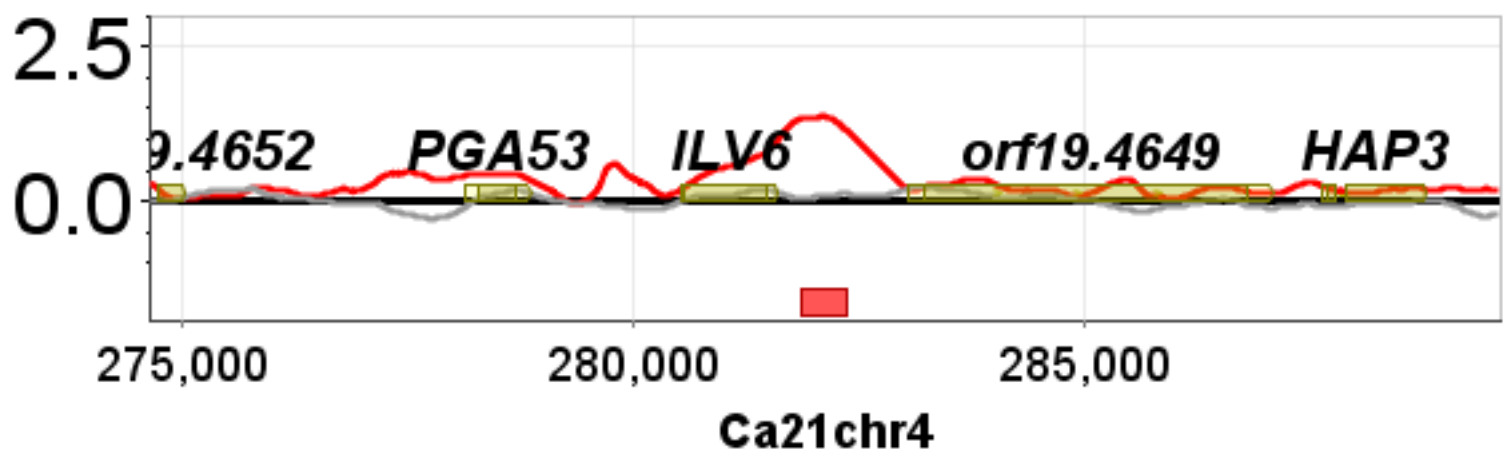

[1.367] Ca21chr2:601321-616320 [+] [orf19.5799, ntar\_340, LIG4, RNR21, PI-PLC]

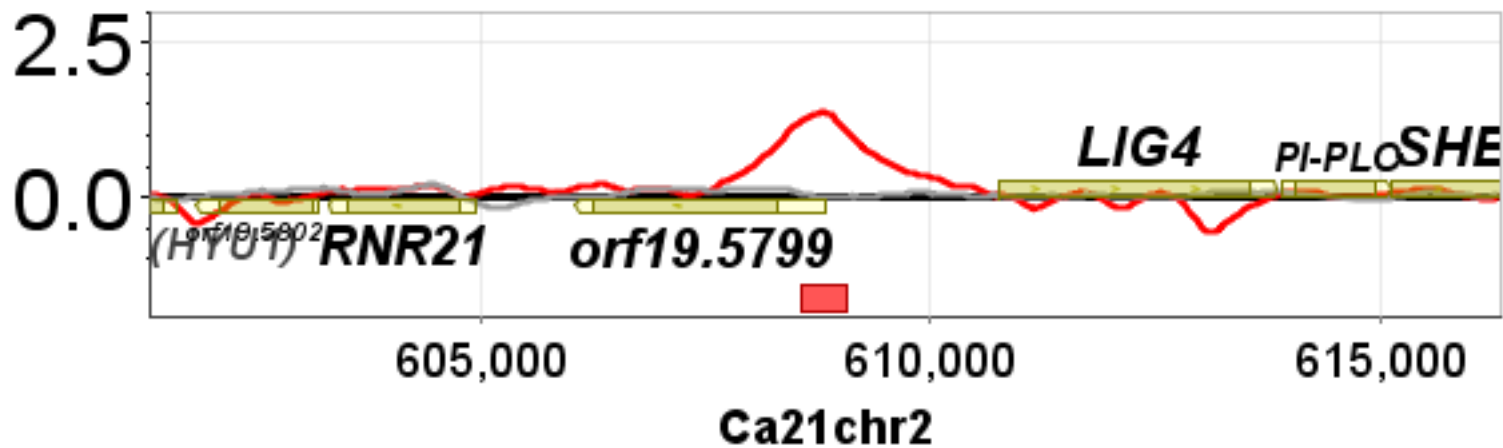

[1.363] Ca21chr5:821073-836072 [+] [FAV2, orf19.1121, orf19.1122, orf19.1123, MTR10]

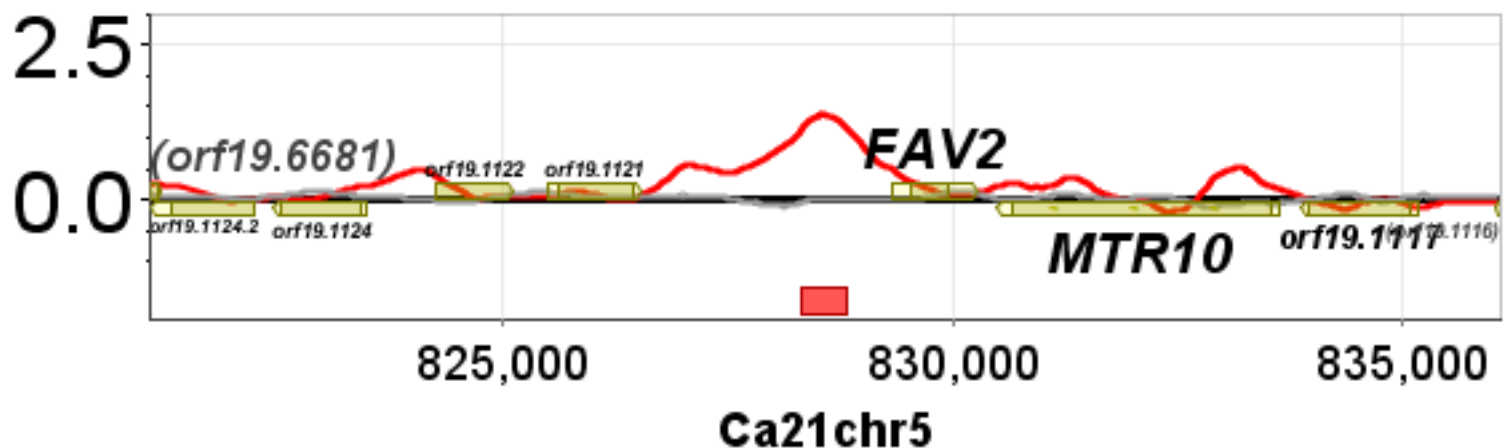

[1.357] Ca21chr6:658748-673747 [+] [BMT6, MDR1, ntar\_1017, orf19.5601, ntar\_1016]

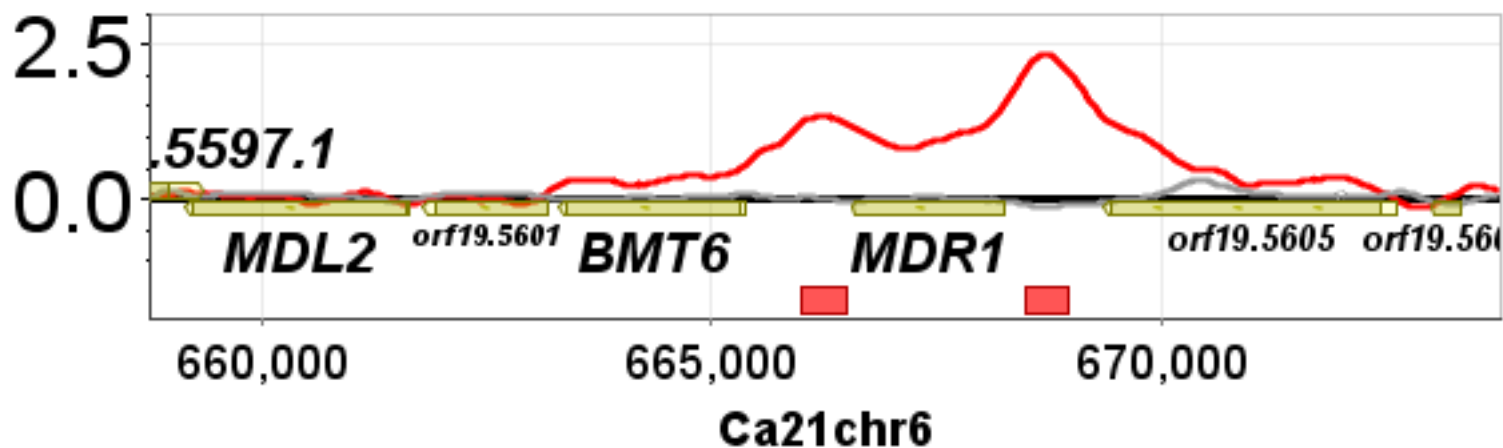

[1.355] Ca21chrR:617158-632157 [+] [ntar\_1226, RPC31, ntar\_1227, ntar\_1228, INN1]

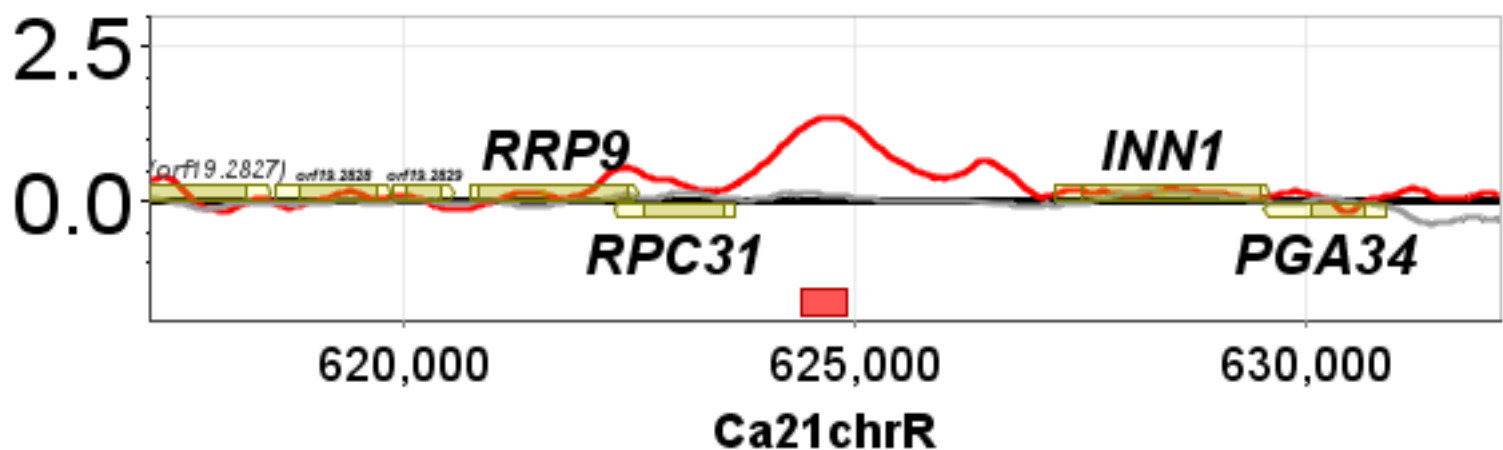

[1.319] Ca21chr3:1079861-1094860 [+] [orf19.5975, ATG9, ntar\_611, orf19.5976, CEM1]

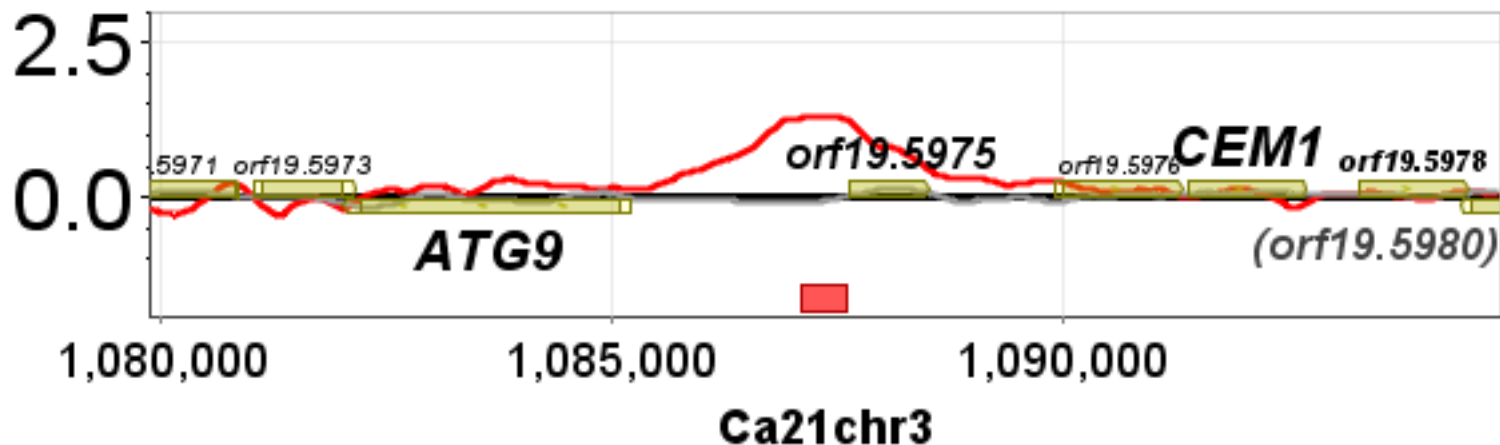

[1.318] Ca21chr4:1130968-1145967 [+] [orf19.6864, VPH1, orf19.2631, orf19.6862, orf19.6861]

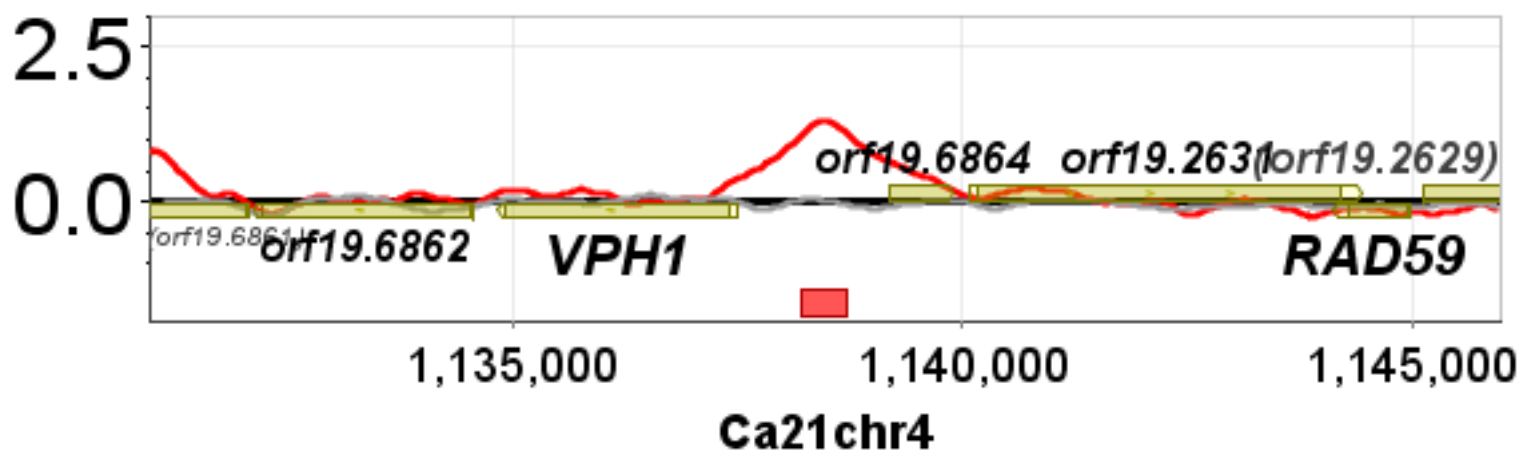

[1.31] Ca21chr3:1714631-1729630 [+] [orf19.6736, ntar\_685, orf19.6737, tf(gaa)5, tr(ucu)5]

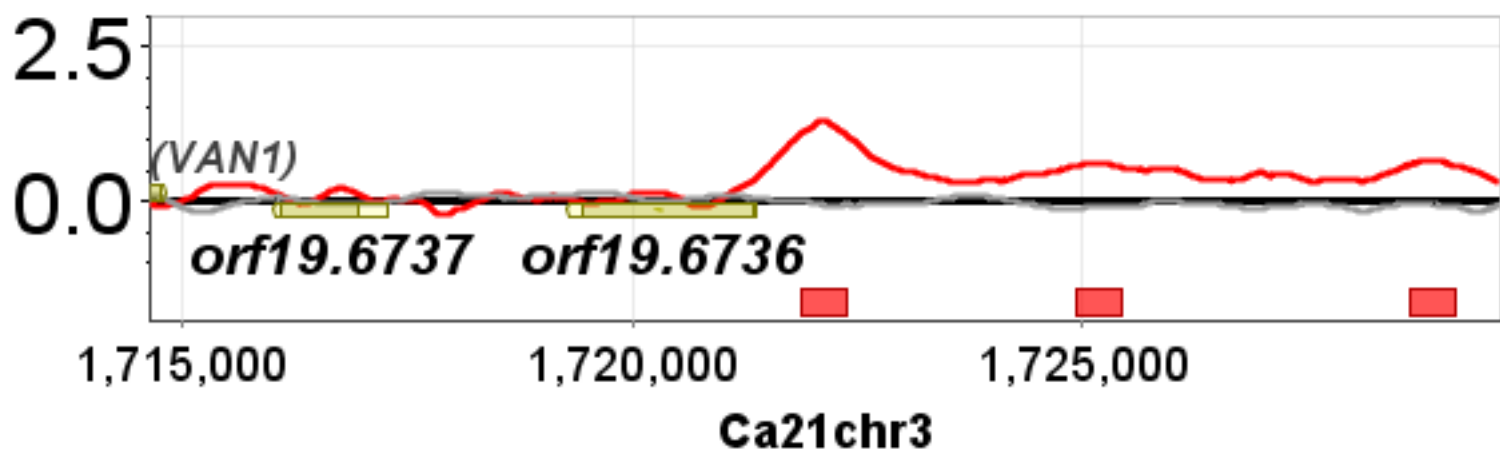

[1.305] Ca21chr3:1463587-1478586 [+] [th(gug)3, GLG2, ntar\_658, ntar\_659, AAF1]

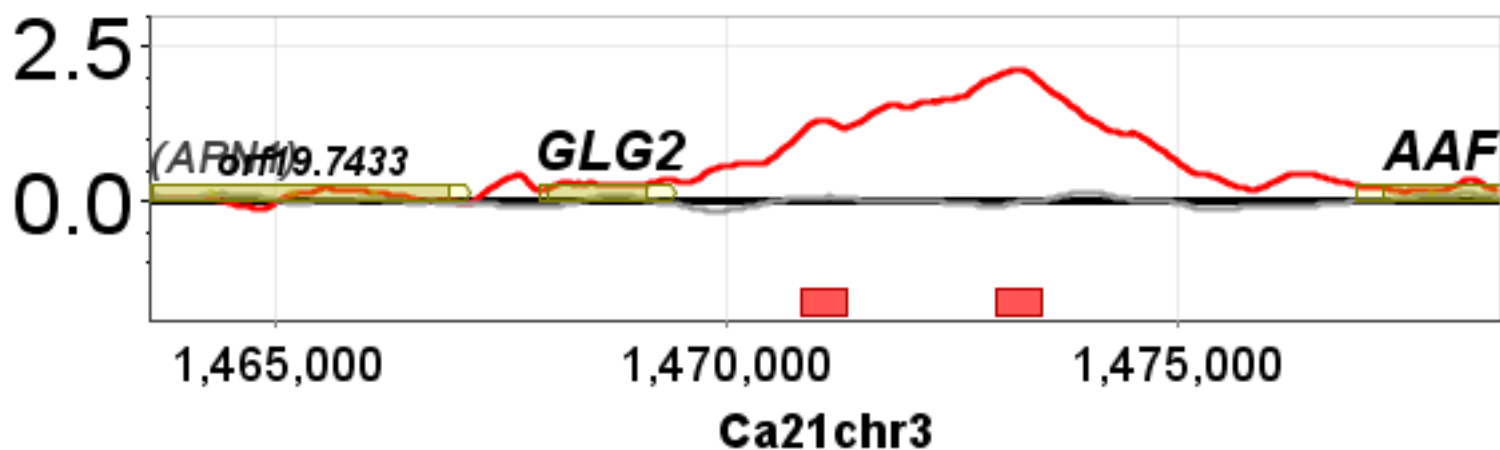

[1.3] Ca21chr1:1926124-1941123 [+] [orf19.4748, orf19.4749, HEM14, JIP5, orf19.4744]

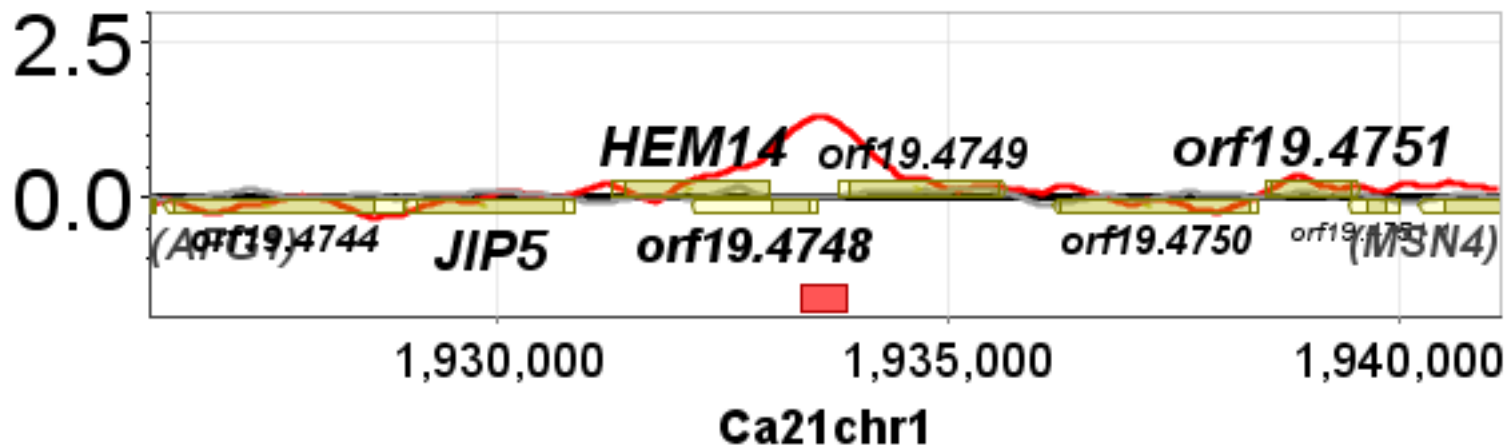

[1.263] Ca21chr1:2218788-2233787 [+] [WOR1, ntar\_207, orf19.4883]

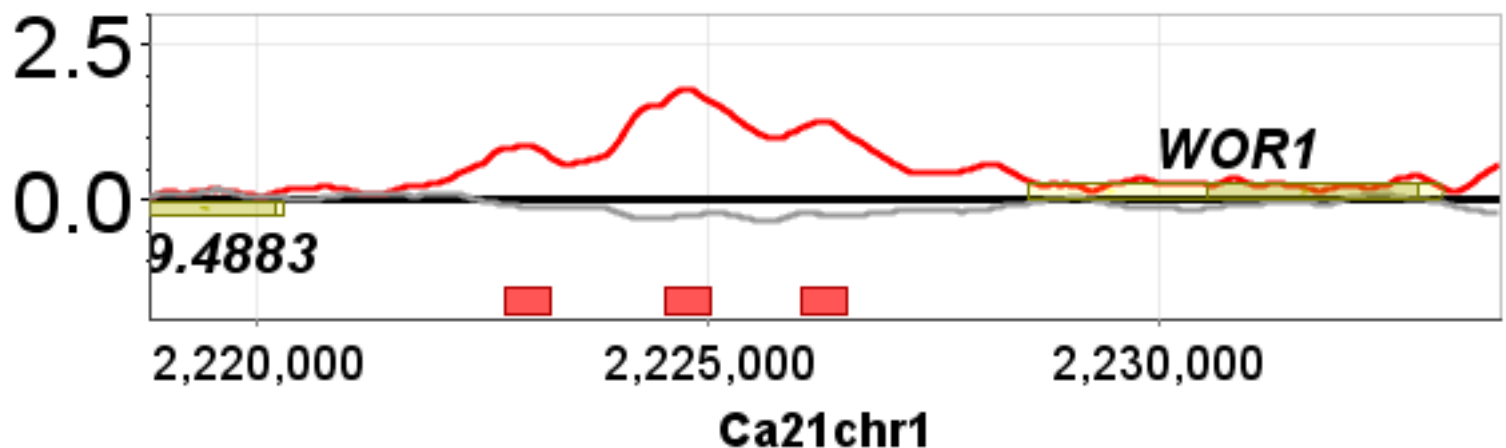

[1.252] Ca21chr1:2227398-2242397 [+] [MIR1, orf19.4886, WOR1, ECM21]

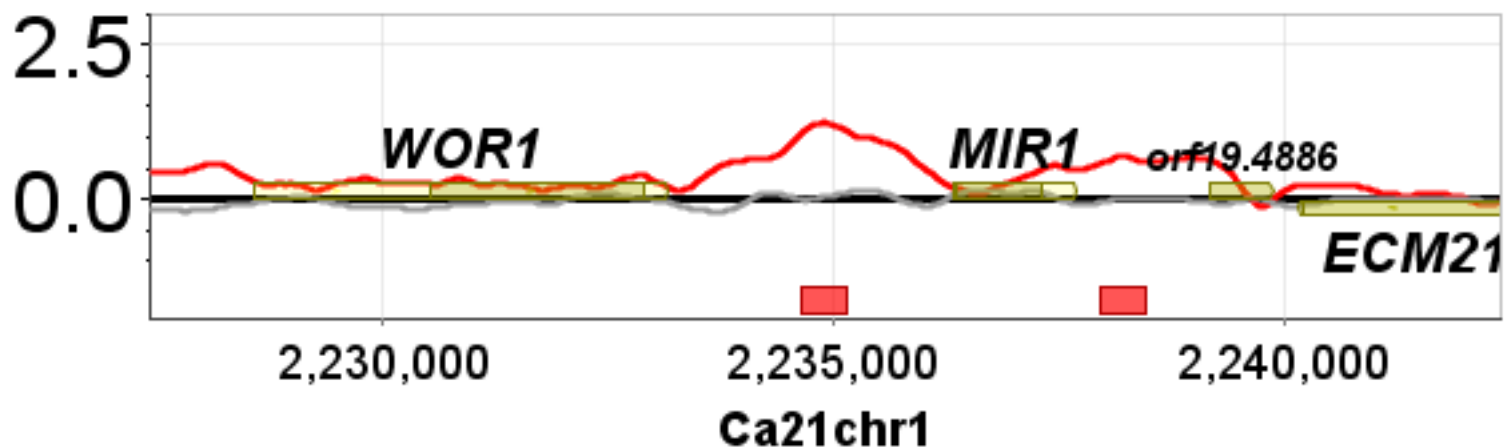

[1.249] Ca21chr3:1389406-1404405 [+] [orf19.7396, GDA1, orf19.7395, orf19.7397, ntar\_652]

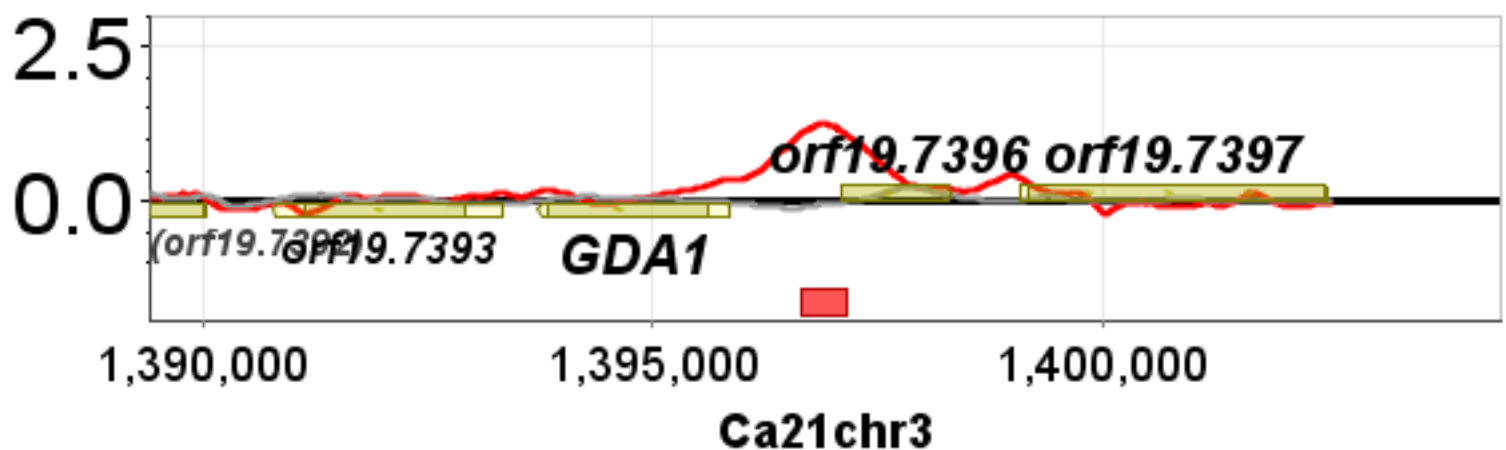

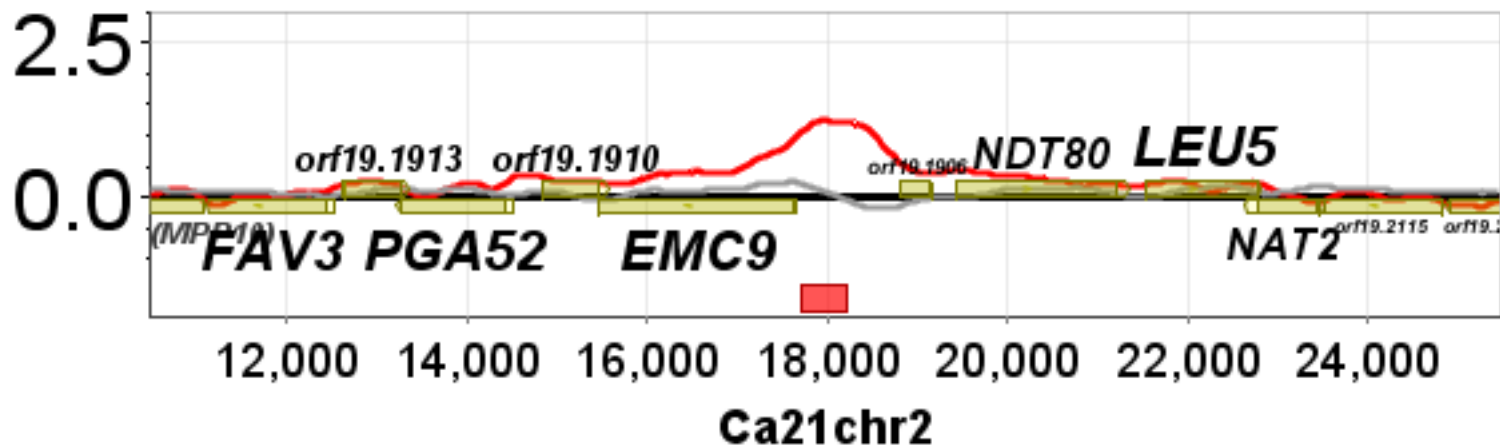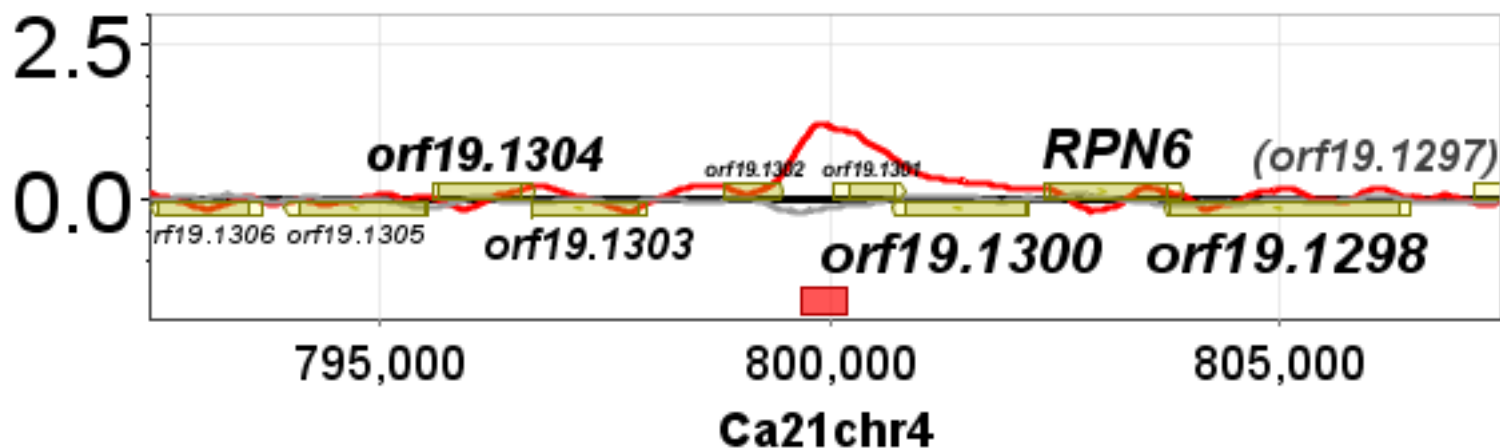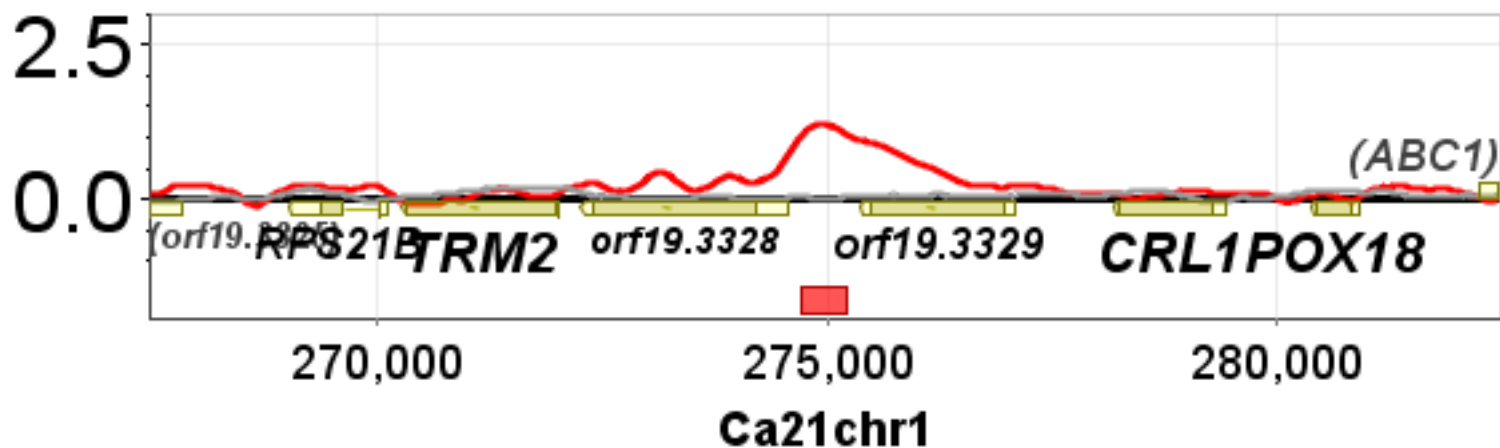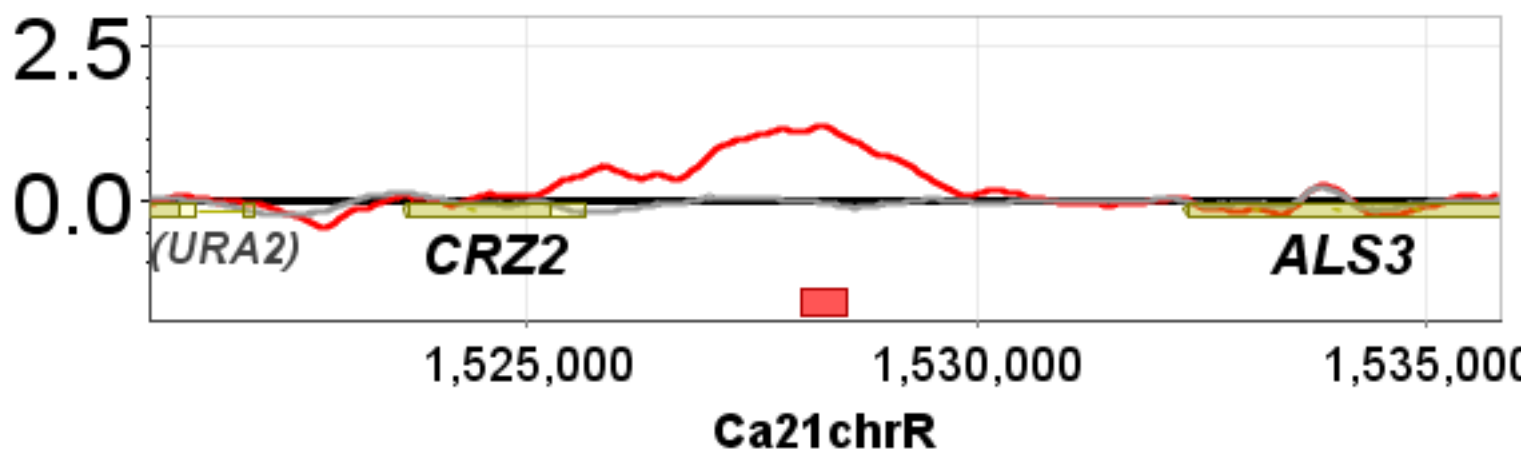

[1.212] Ca21chr4:754195-769194 [+] [HWP1, orf19.1323, orf19.1318, RAD2, ECM38]

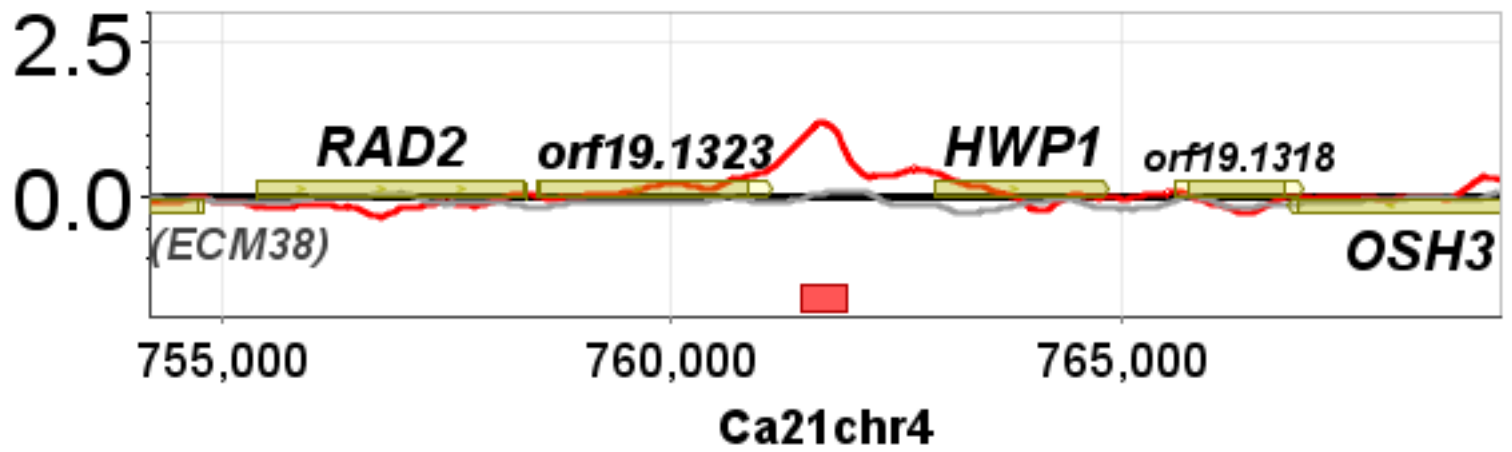

[1.2] Ca21chr3:1210854-1225853 [+] [orf19.6983, ntar\_632, ntar\_633, orf19.6982]

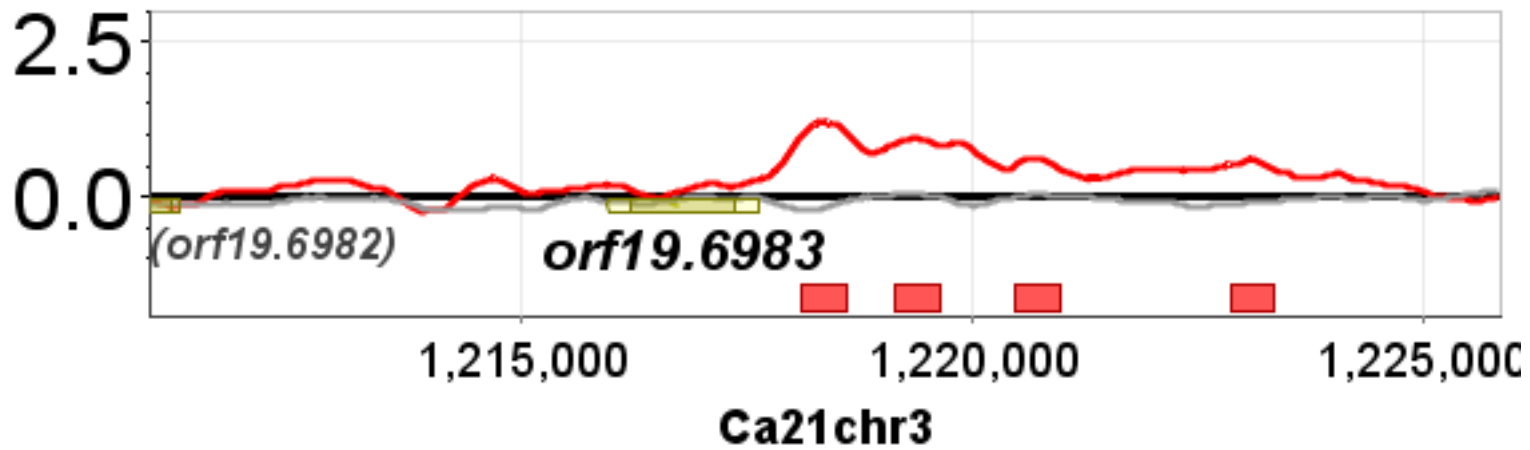

[1.2] Ca21chrR:1424137-1439136 [+] [ntar\_1321, SEO1, CFL11, ntar\_1320, orf19.699]

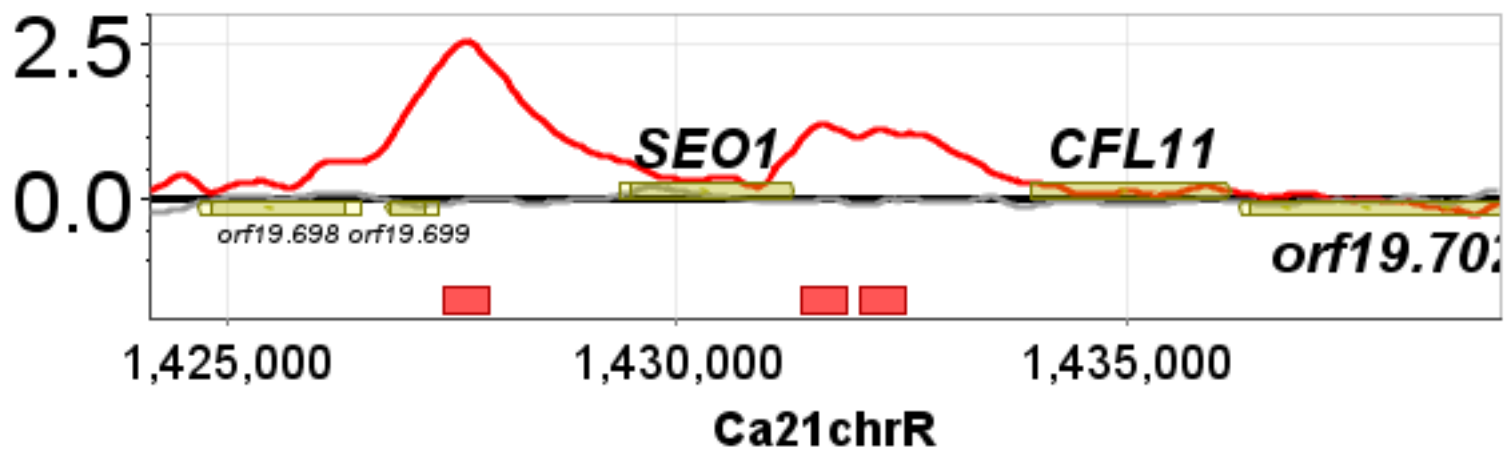

[1.191] Ca21chr5:441518-456517 [+] [ACH1, ntar\_885, orf19.3172, orf19.3173, orf19.3170]

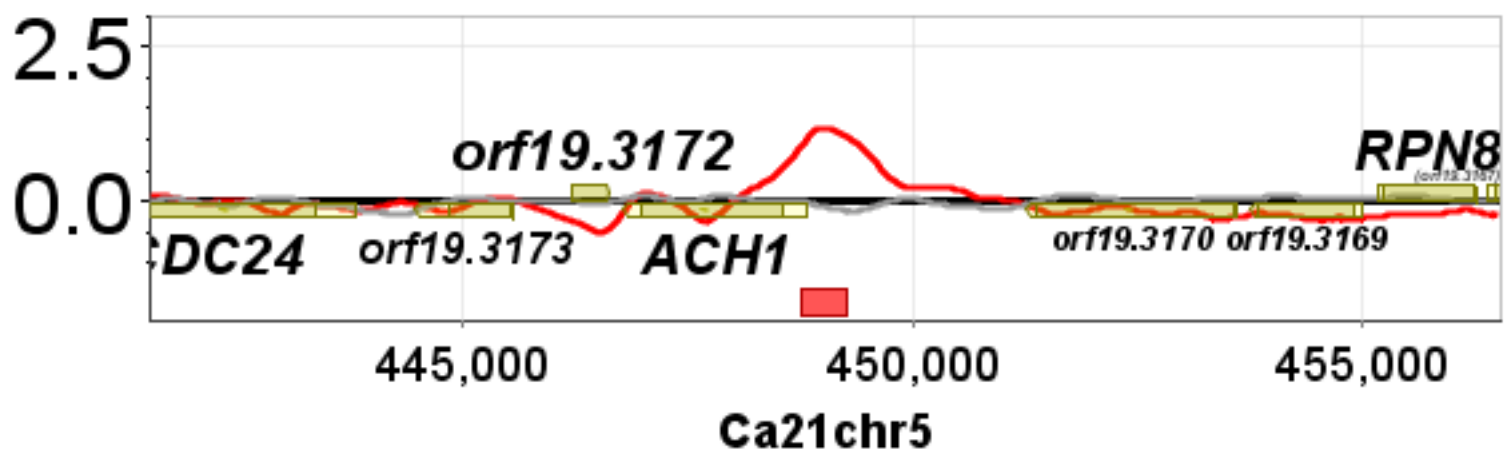



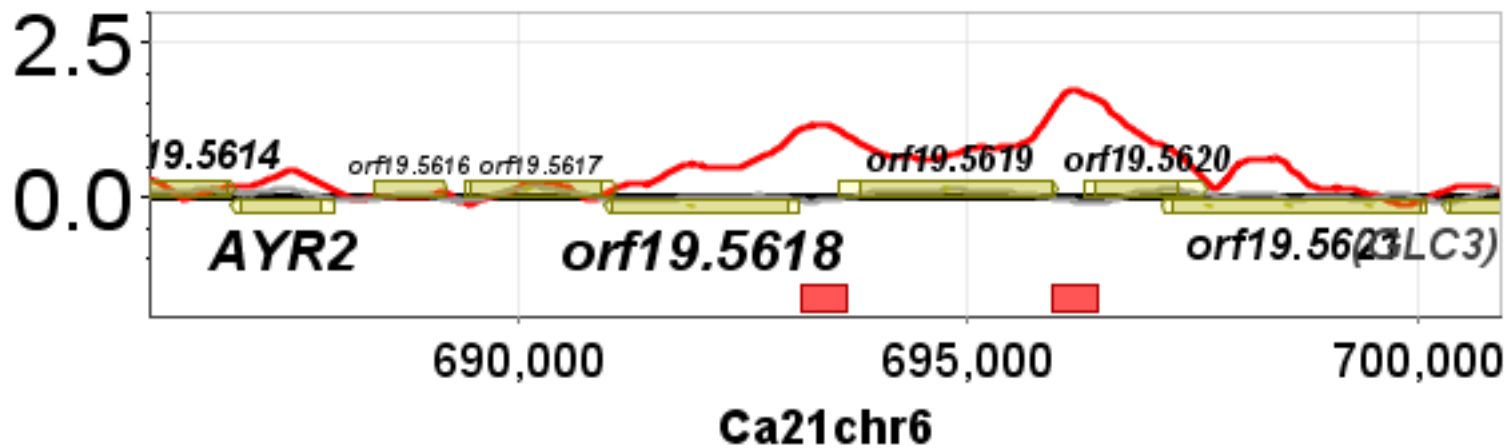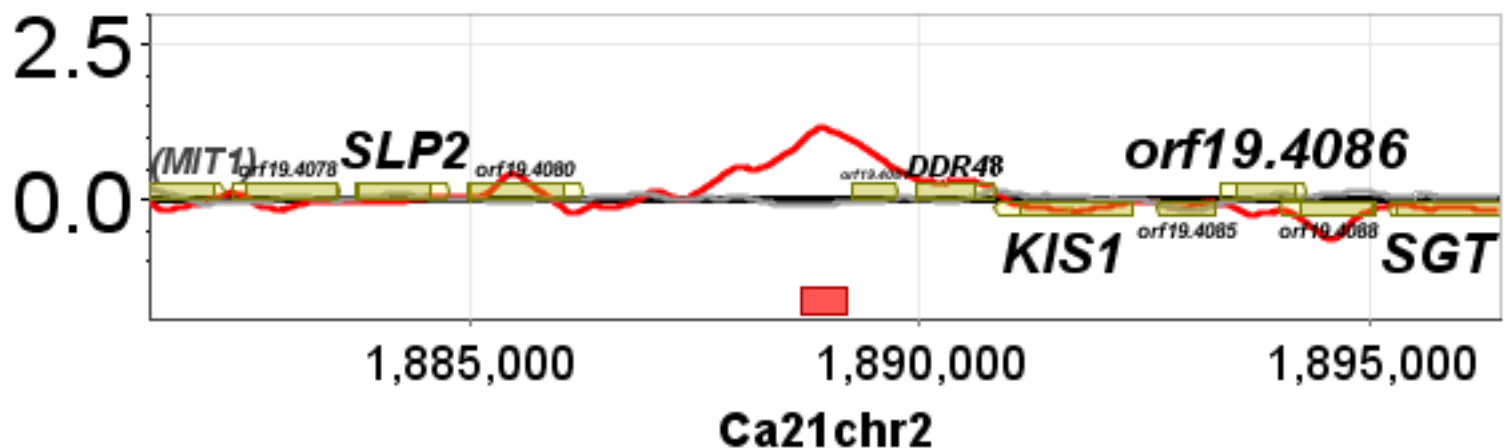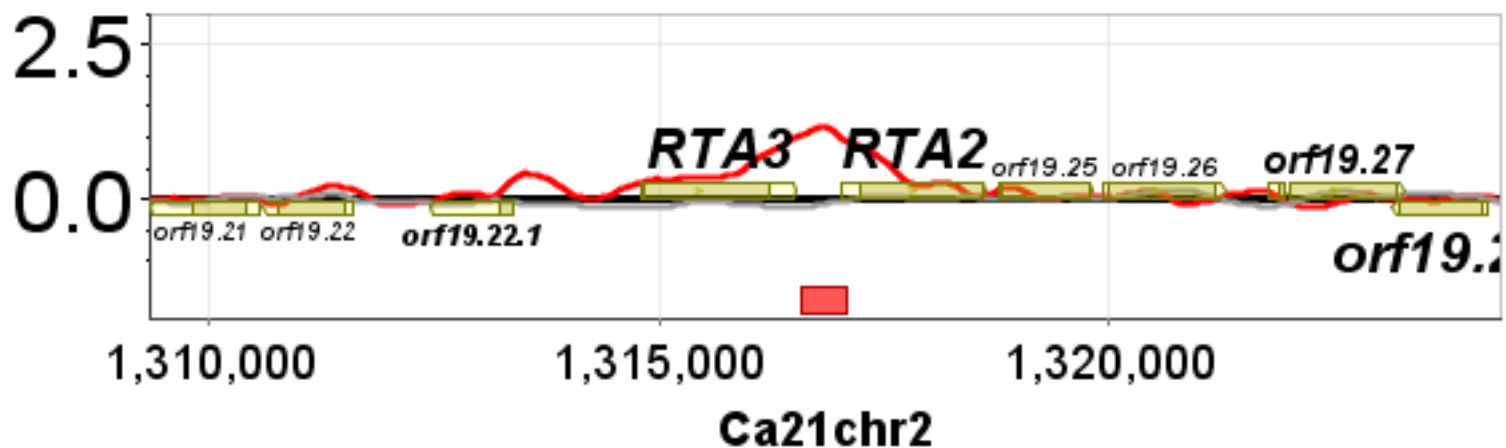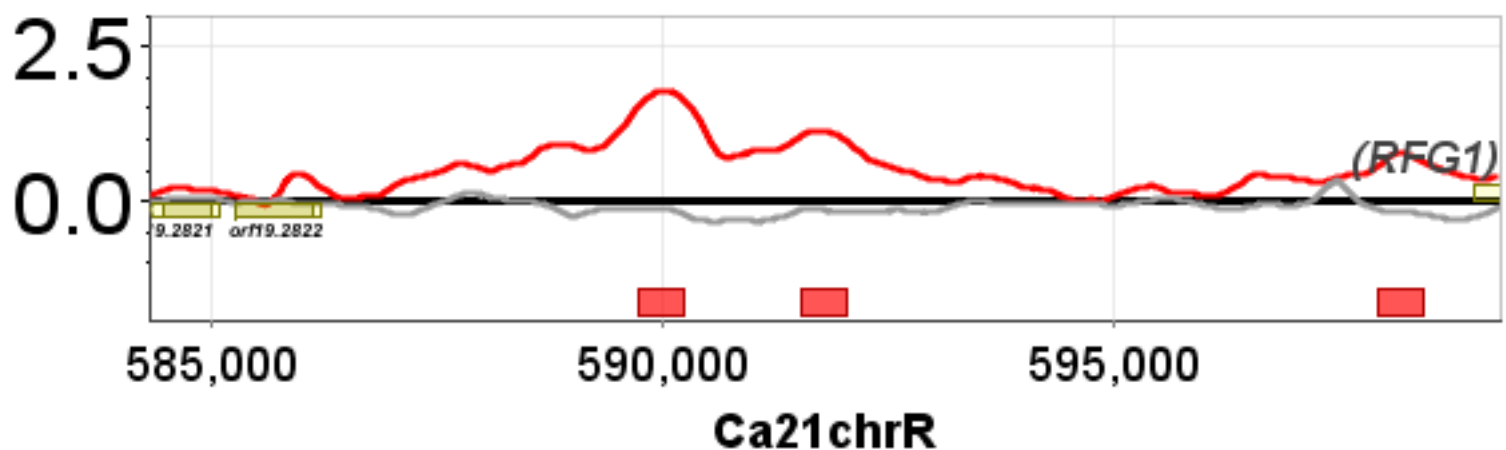

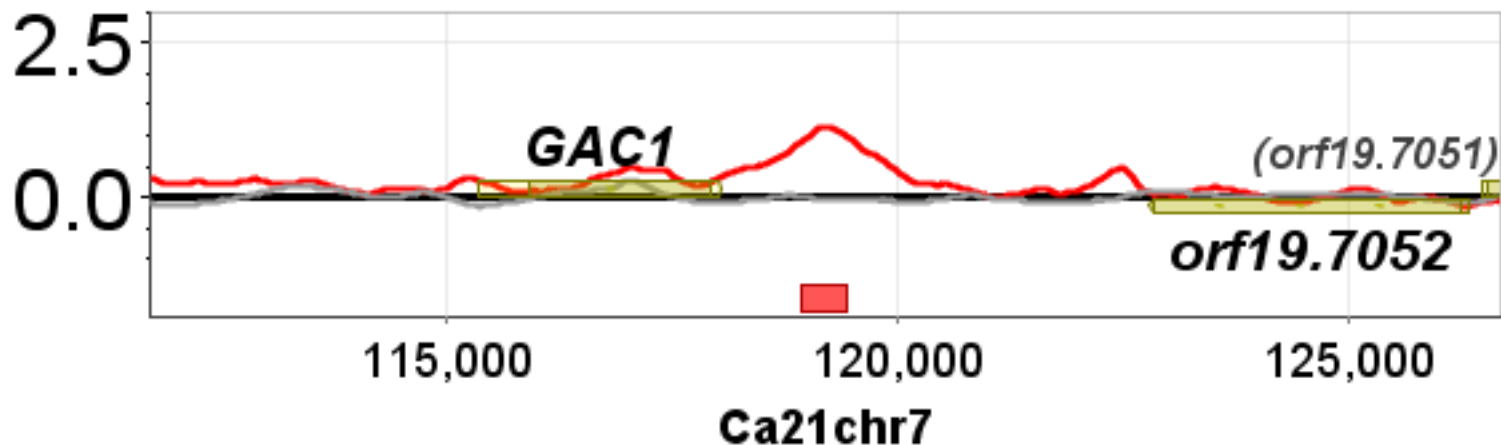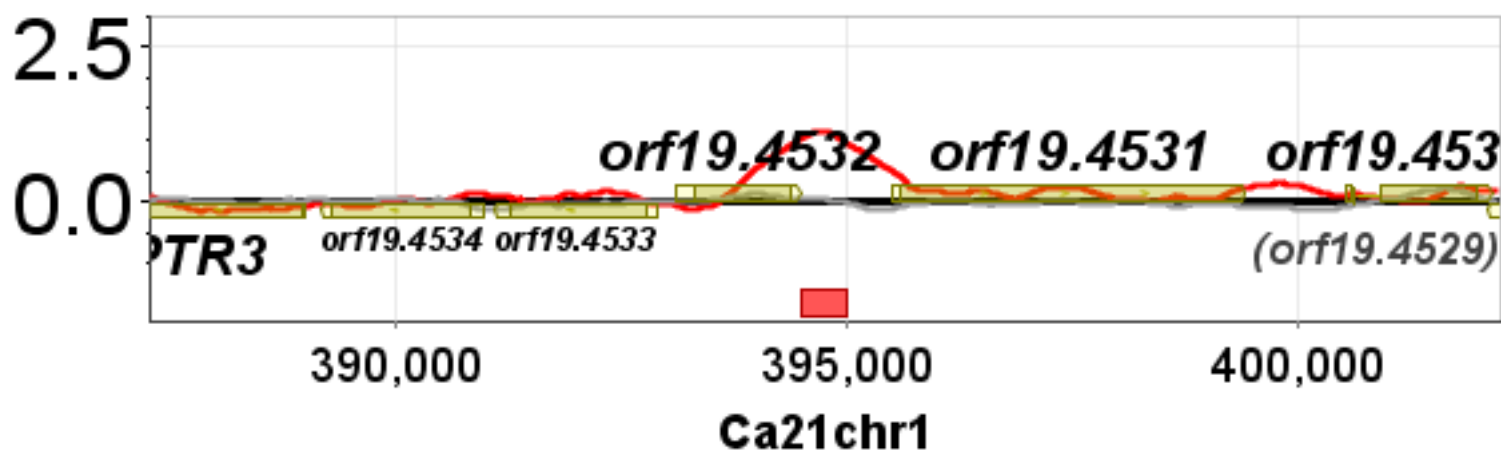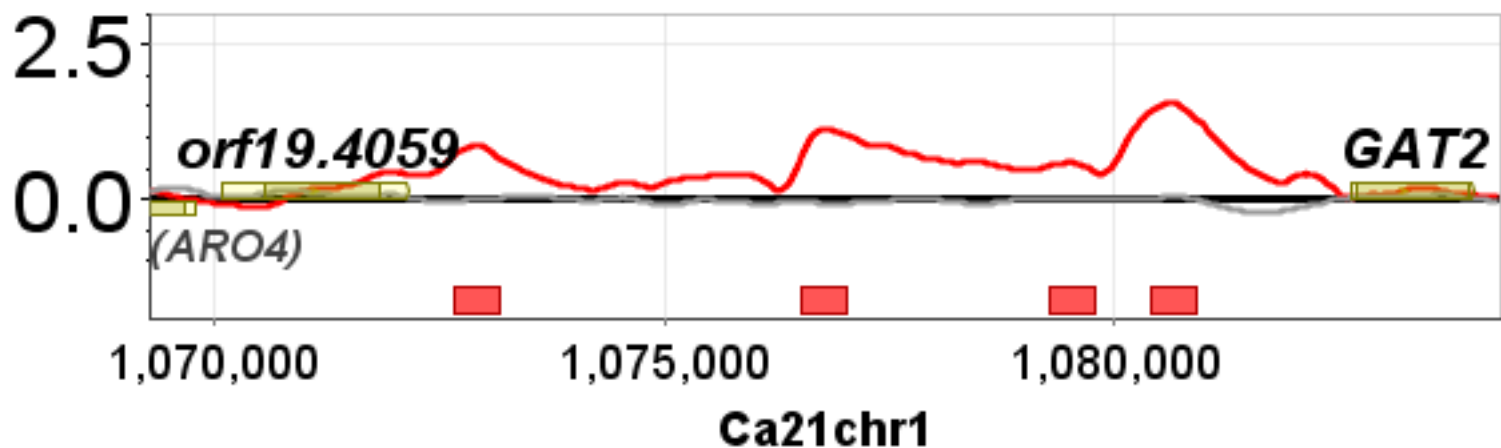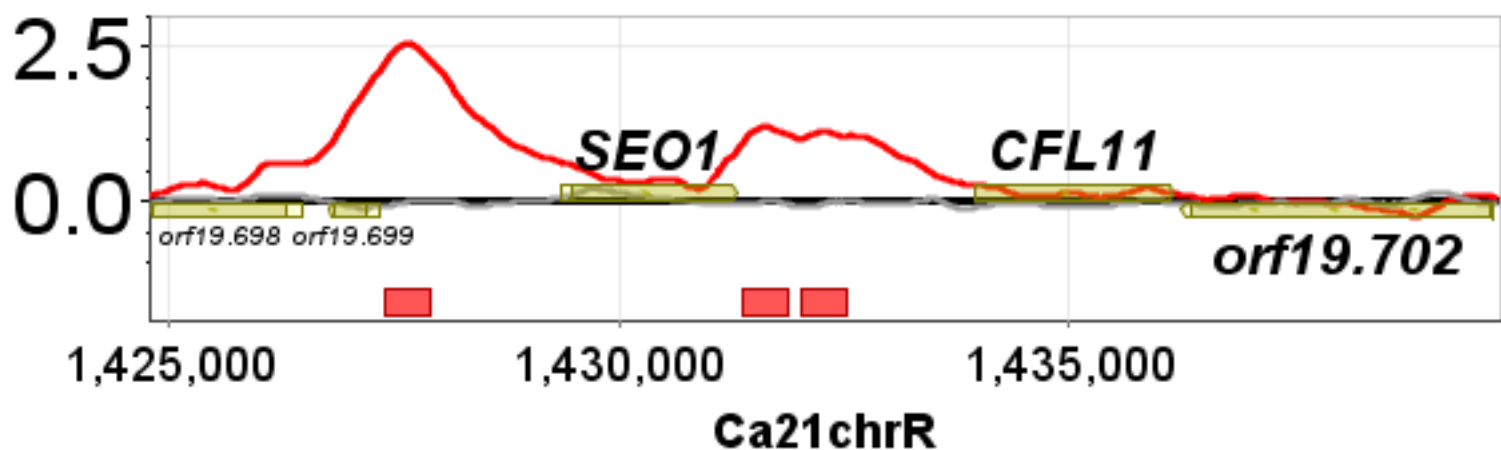

[1.119] Ca21chrR:2152444-2167443 [+] [CHT3, INO1, orf19.7588, orf19.7589, ntar\_1403]

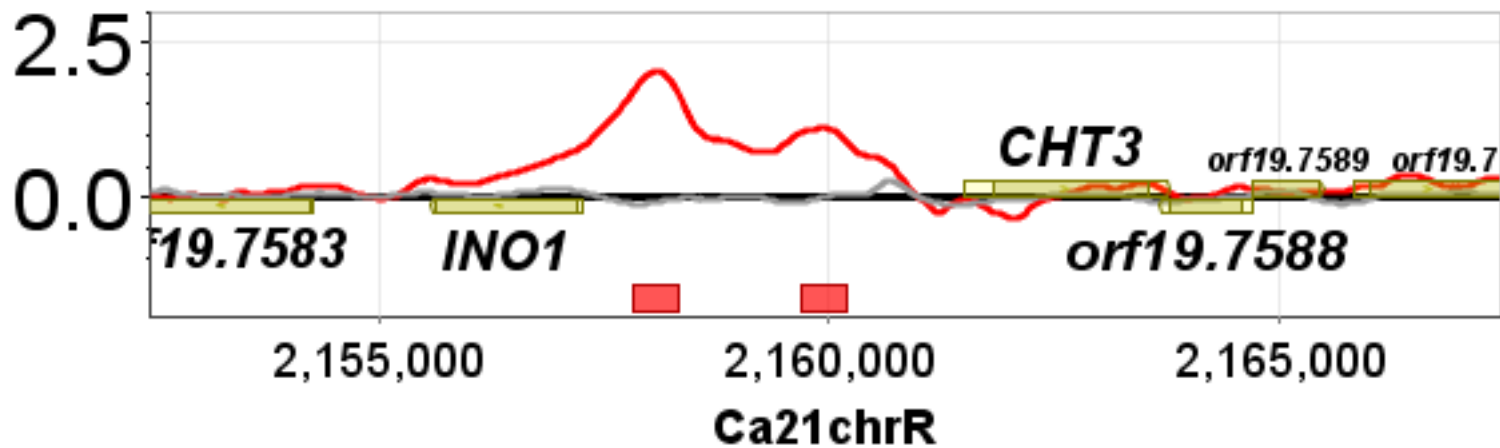

[1.095] Ca21chr7:904870-919869 [+] [ntar\_1151, ntar\_1152, orf19.7151, ntar\_1153, orf19.7152]

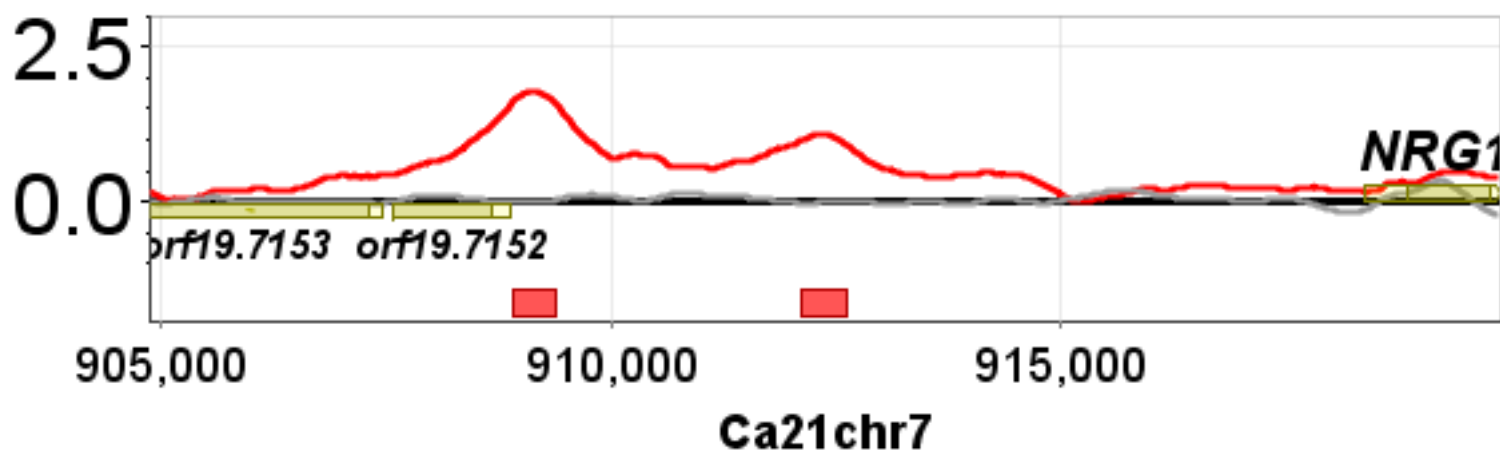

[1.086] Ca21chr2:222308-237307 [+] [orf19.1991, SIR2, orf19.1993, SNX4, orf19.1994]

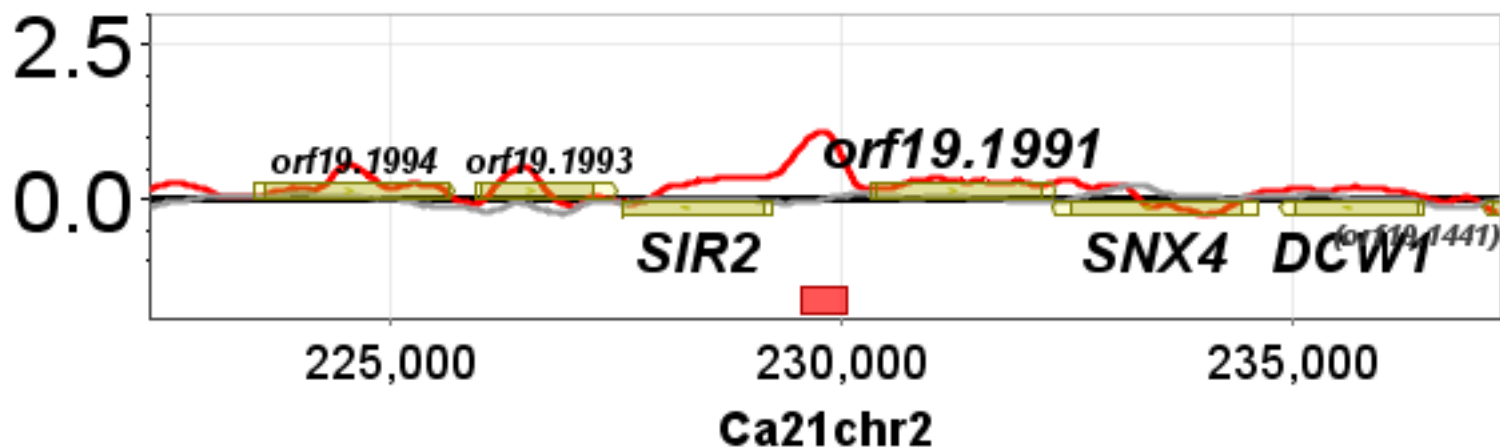

[1.08] Ca21chr5:890091-905090 [+] [orf19.1286, ntar\_940, orf19.1285, orf19.1287, ntar\_939]

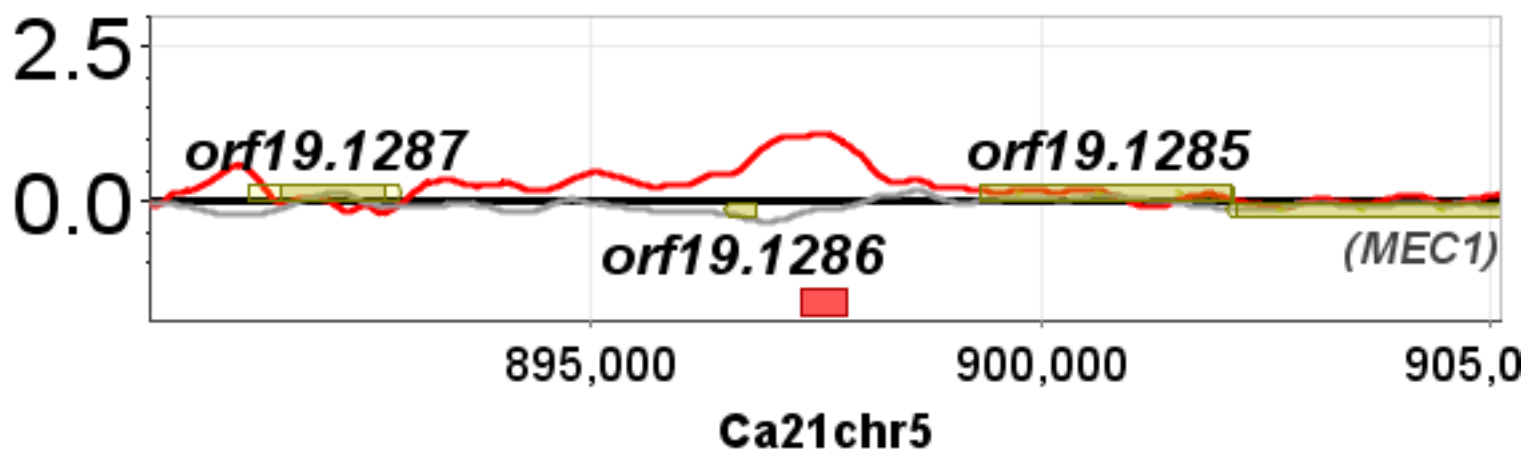

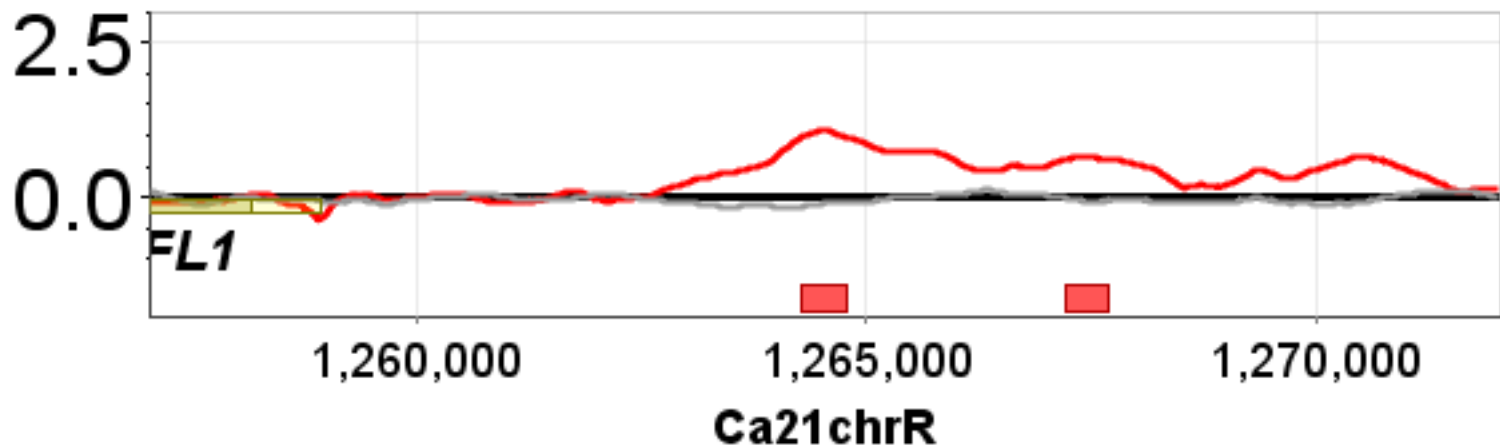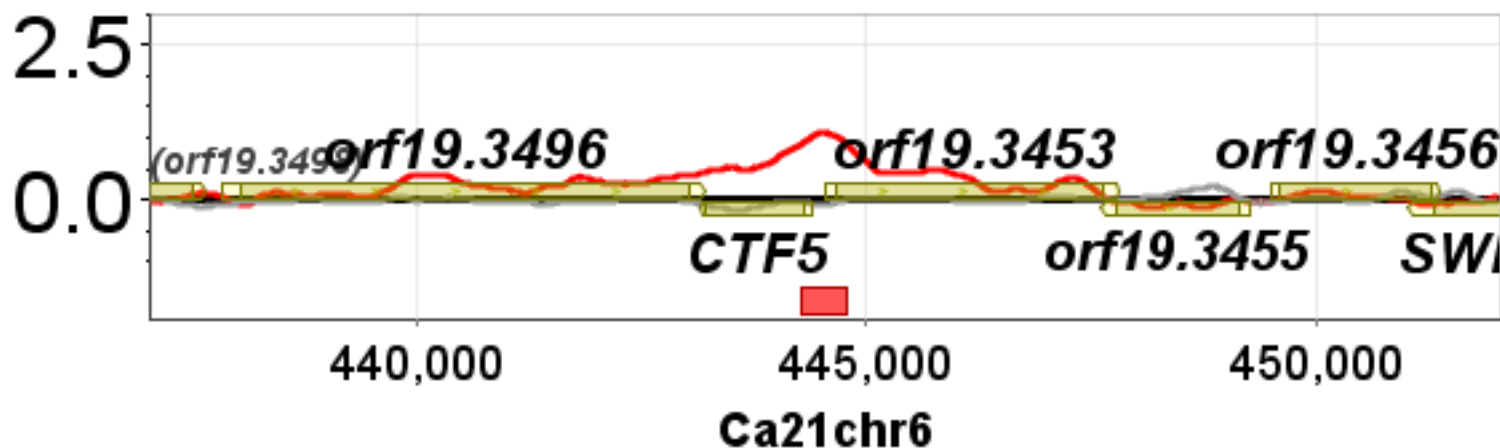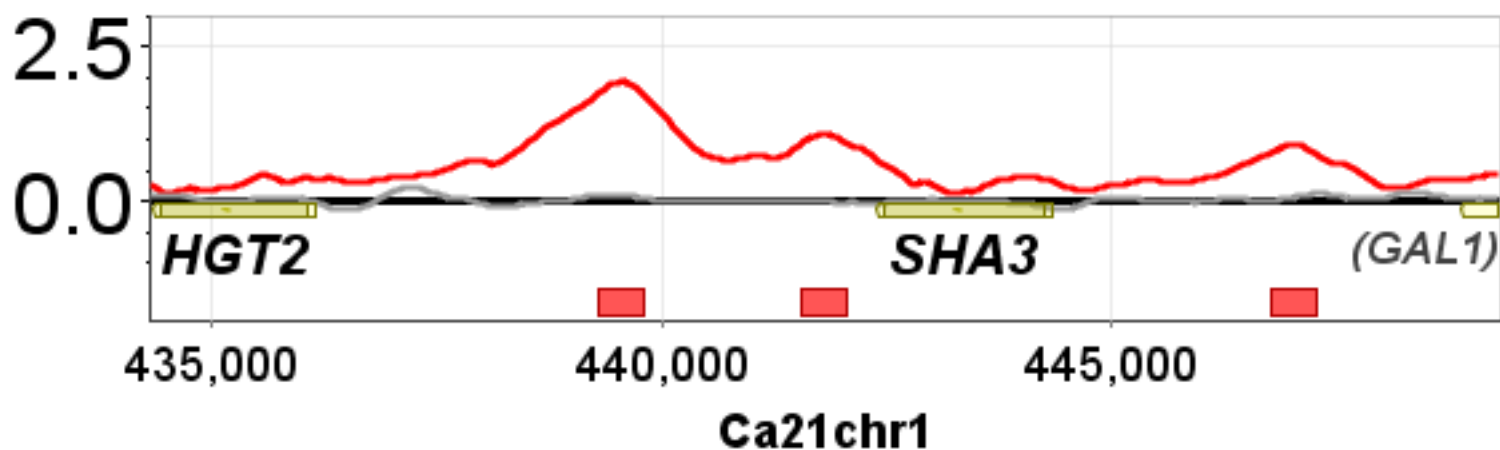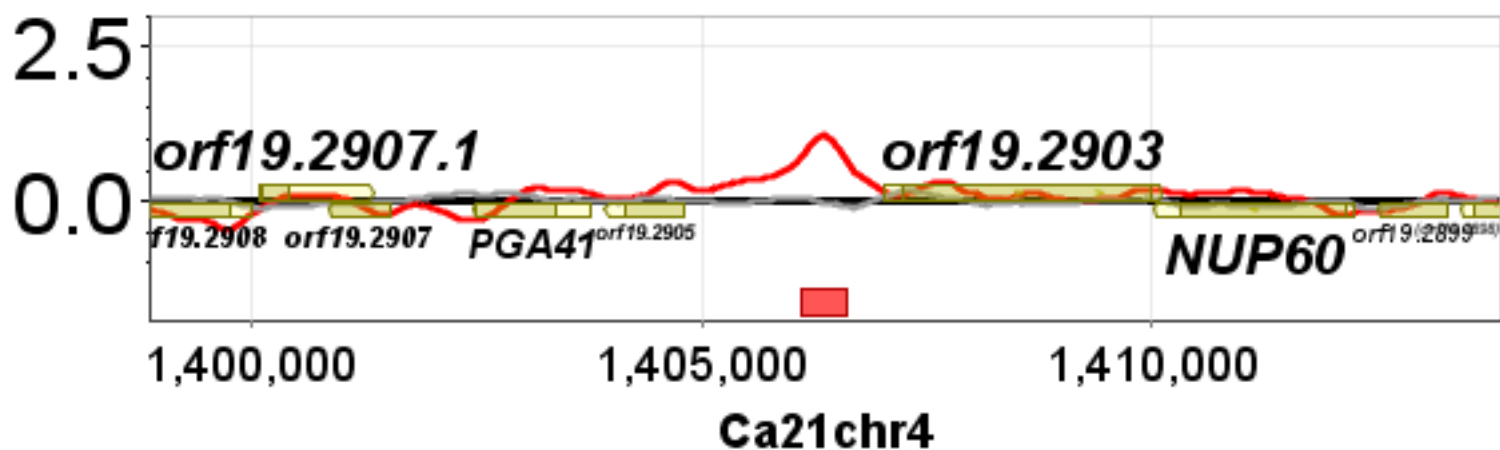

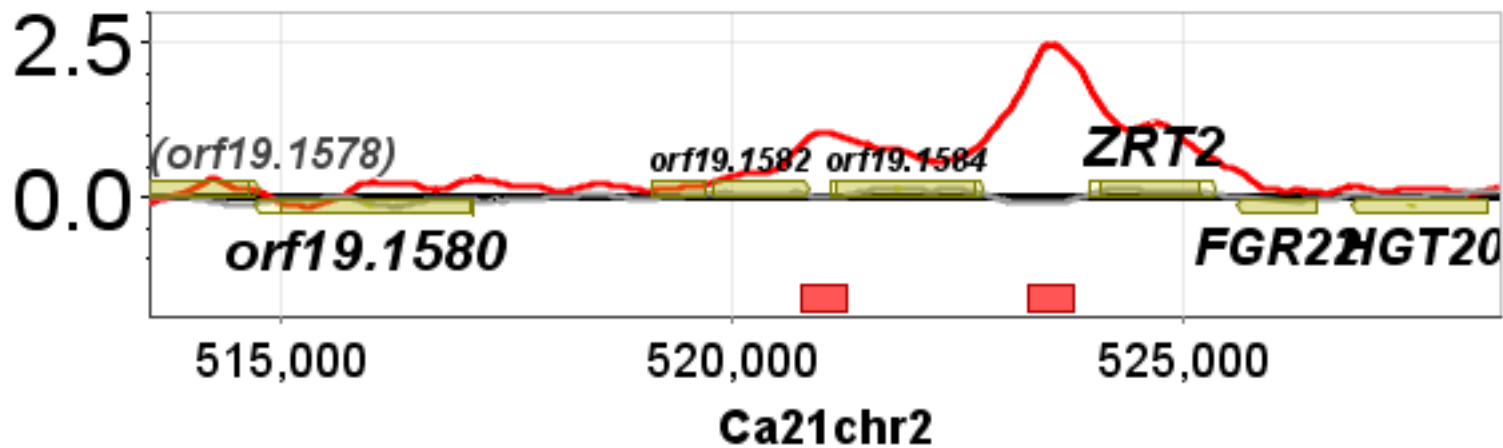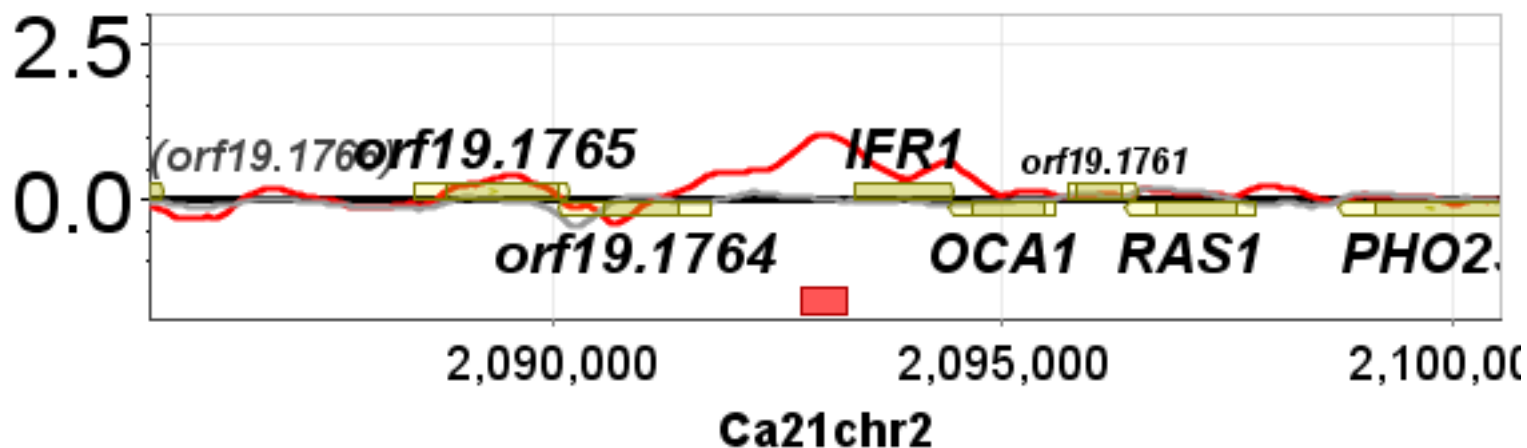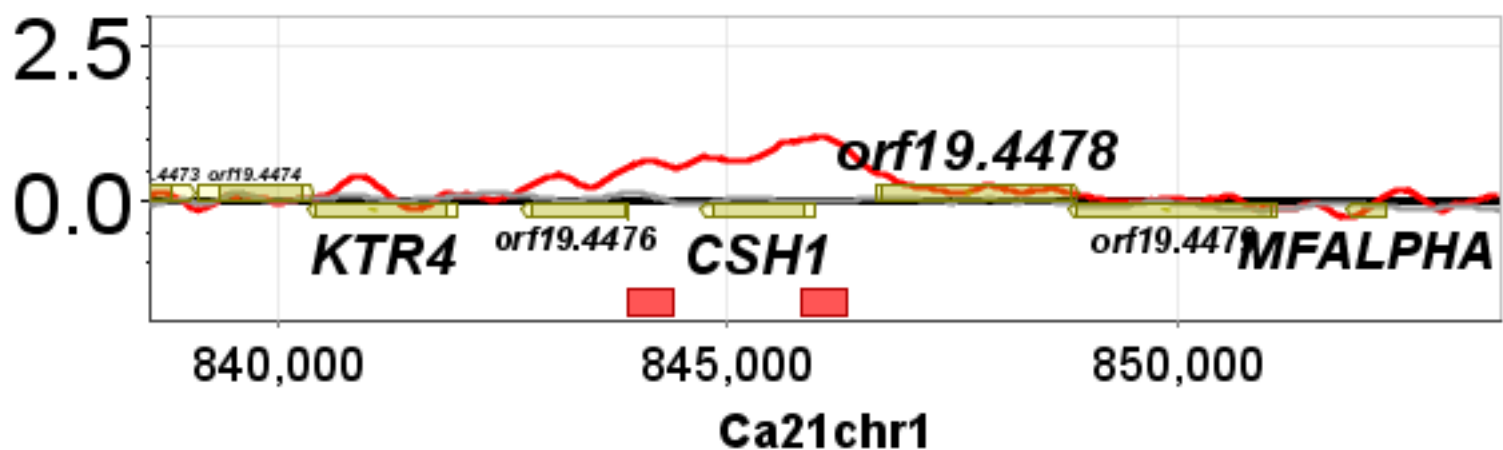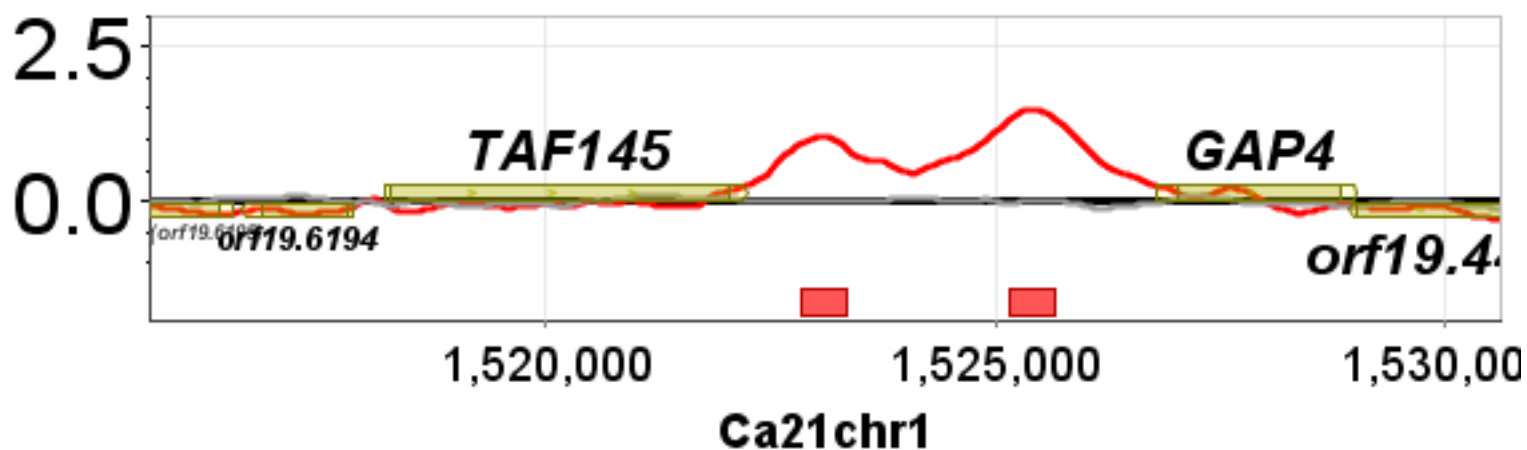

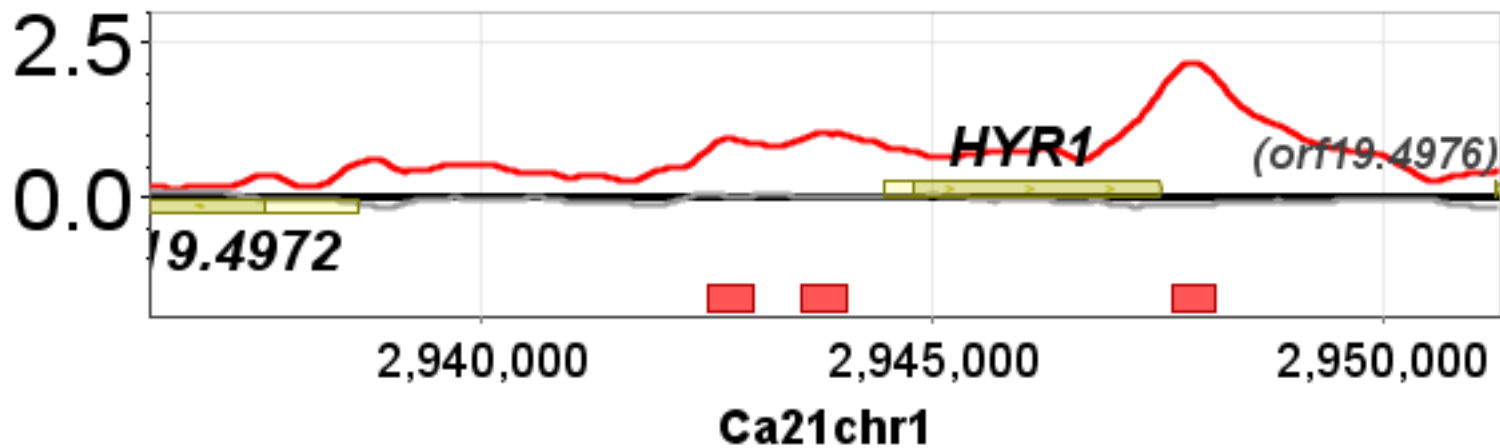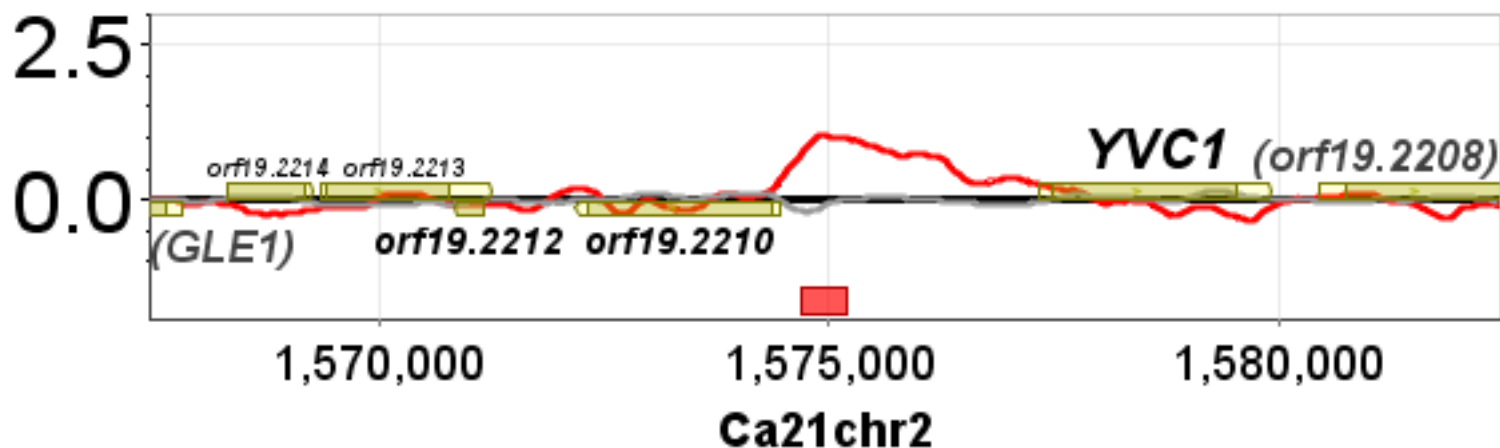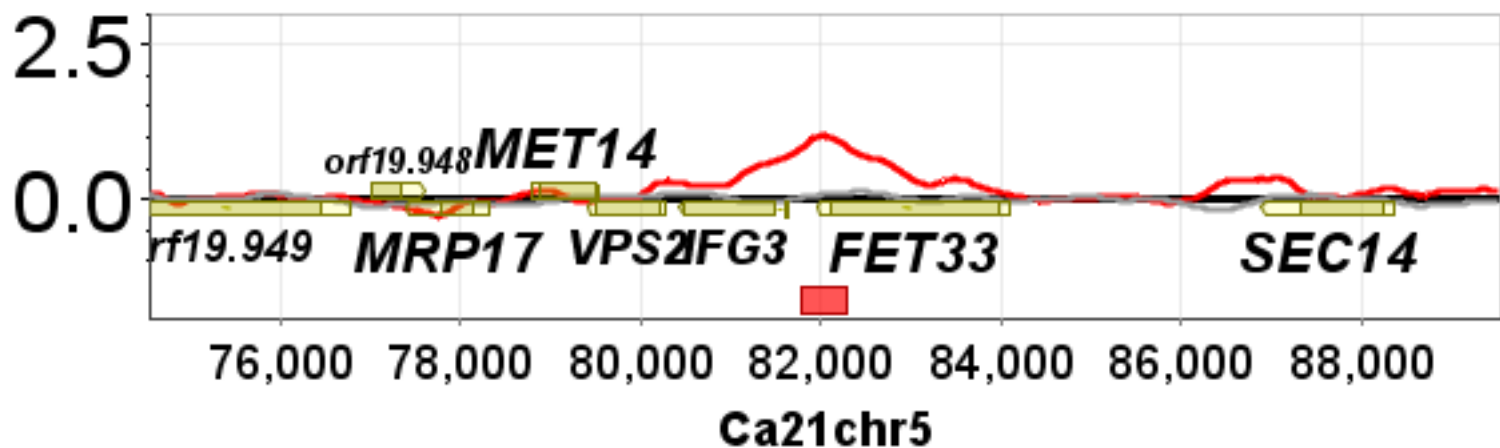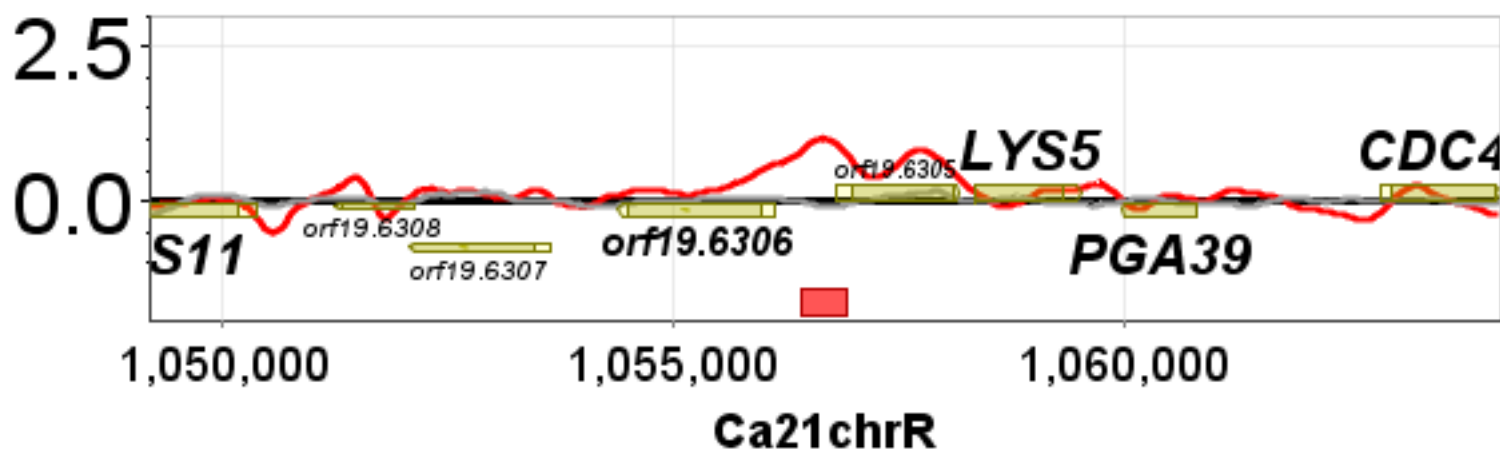

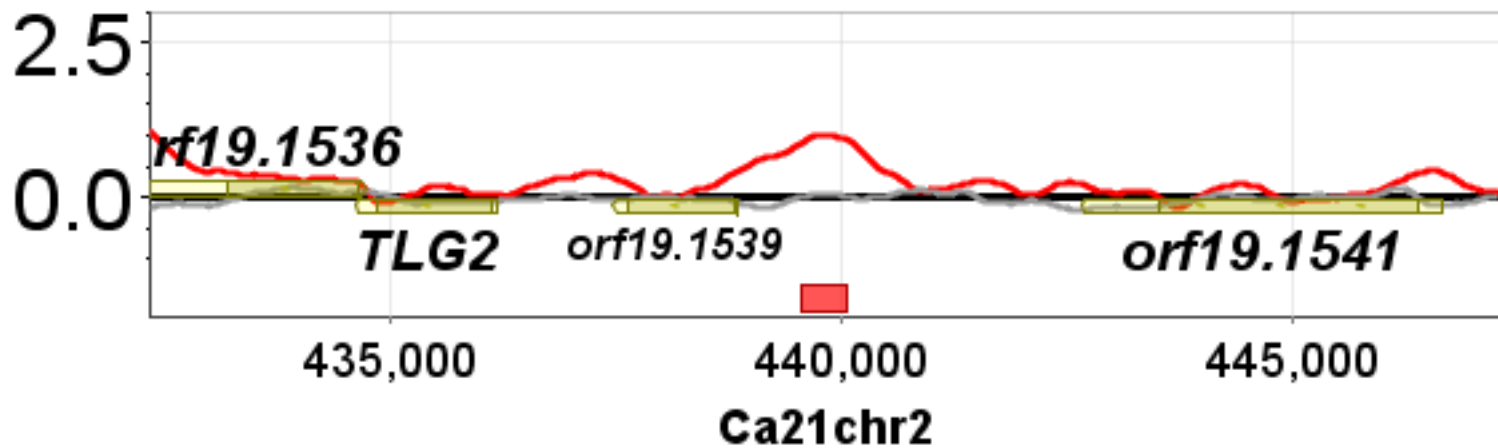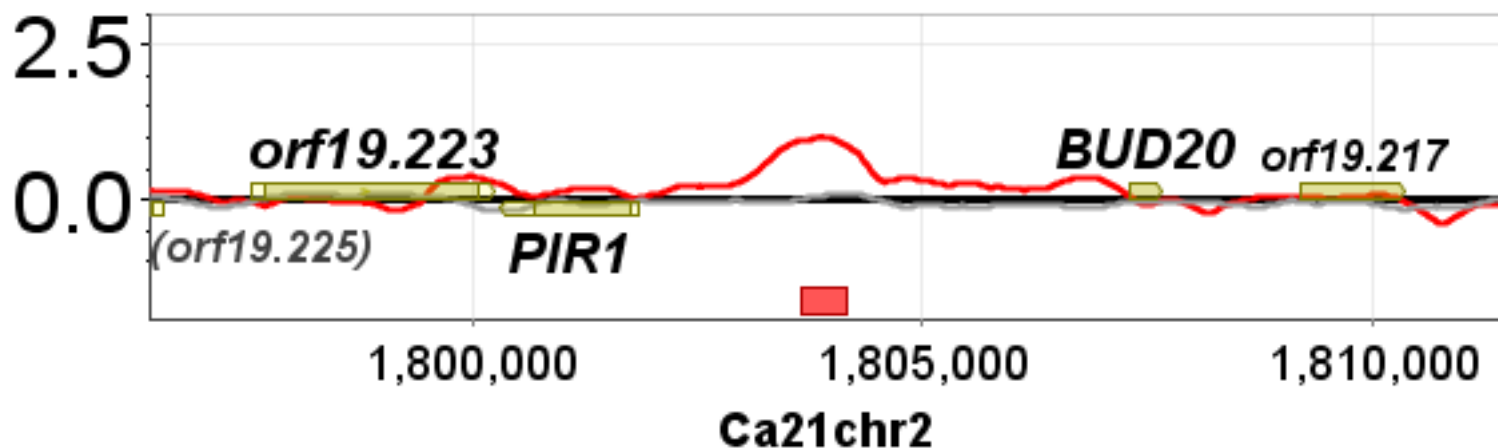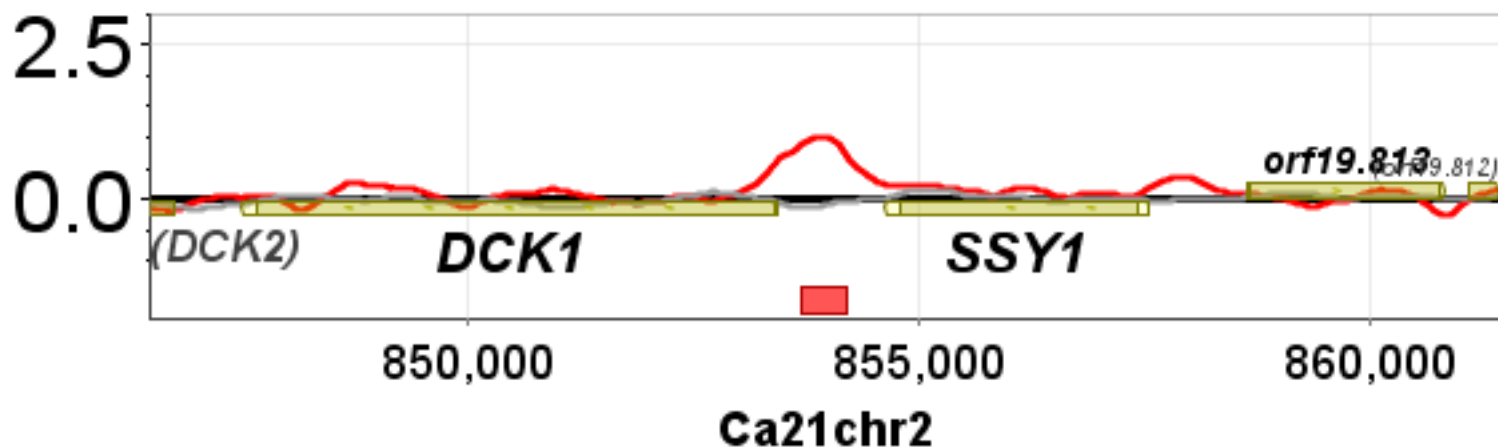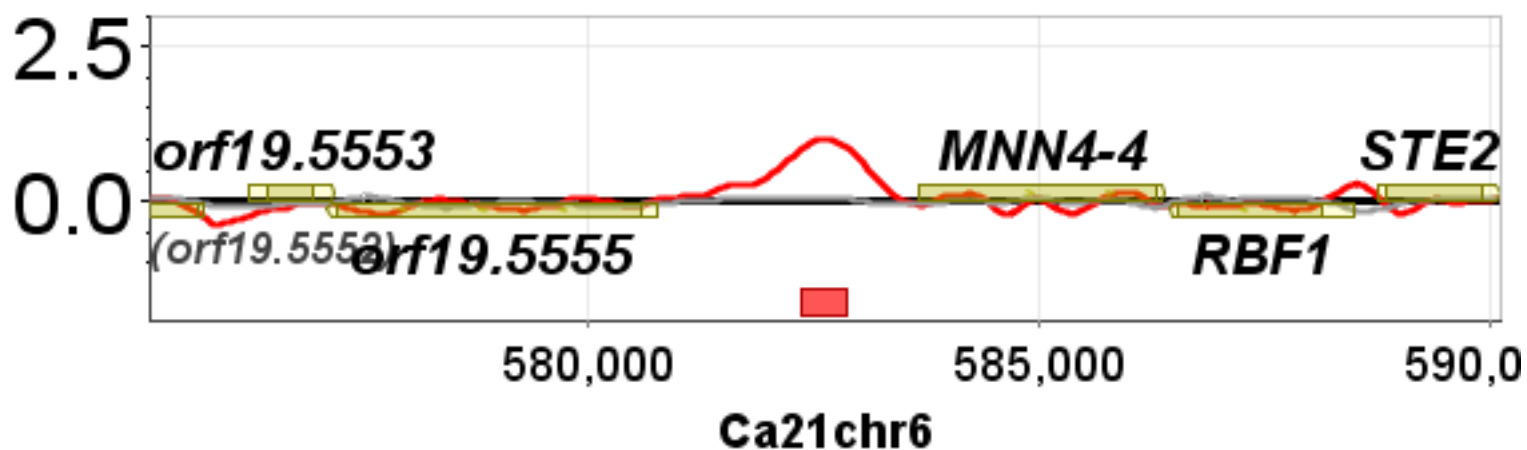

[1.007] Ca21chr3:828010-843009 [+] [CTN3, te(uuc)6, orf19.2808, ntar\_599, AAP1]

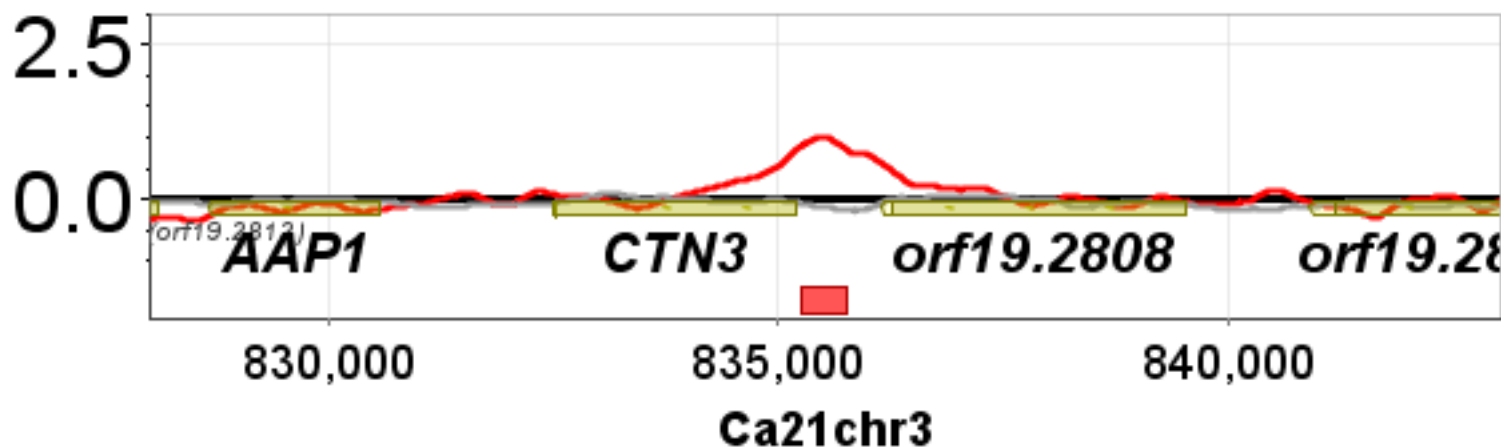

[1.006] Ca21chr7:661837-676836 [+] [orf19.5147, CYR1, SSP96, PGA28, CHS6]

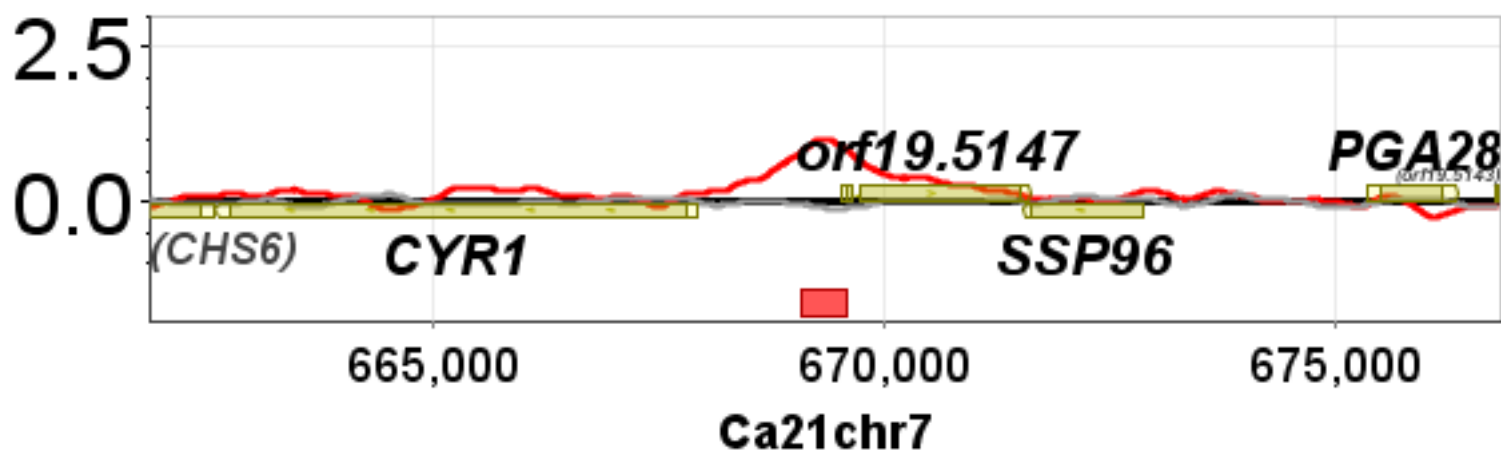

[1.003] Ca21chr5:231396-246395 [+] [orf19.1961, orf19.1963, CLN3]

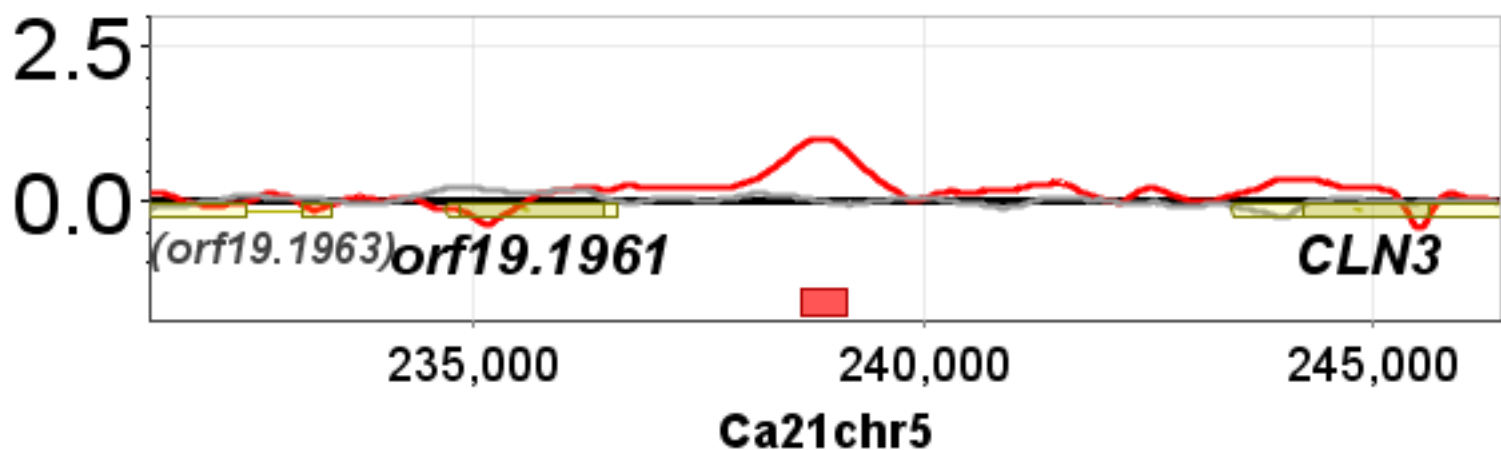

[0.991] Ca21chr1:1081784-1096783 [+] [ntar\_104, orf19.450, orf19.449, GAT2, orf19.448]

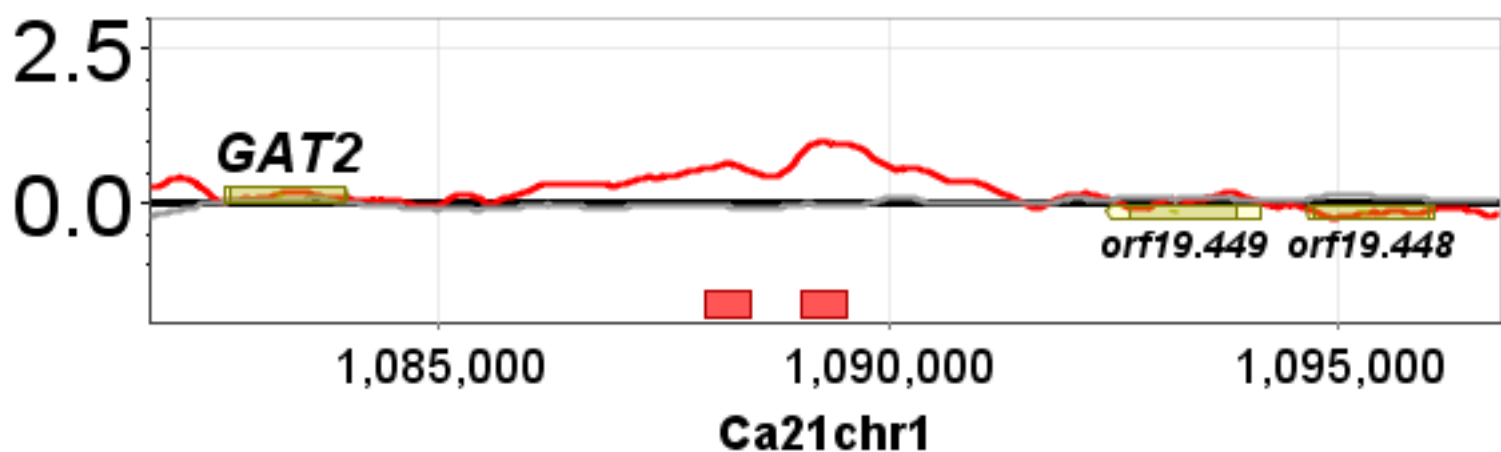



[0.991] Ca21chrR:1462201-1477200 [+] [ARO10, ntar\_1328, orf19.1848.1, orf19.1844, ts(aga)2]

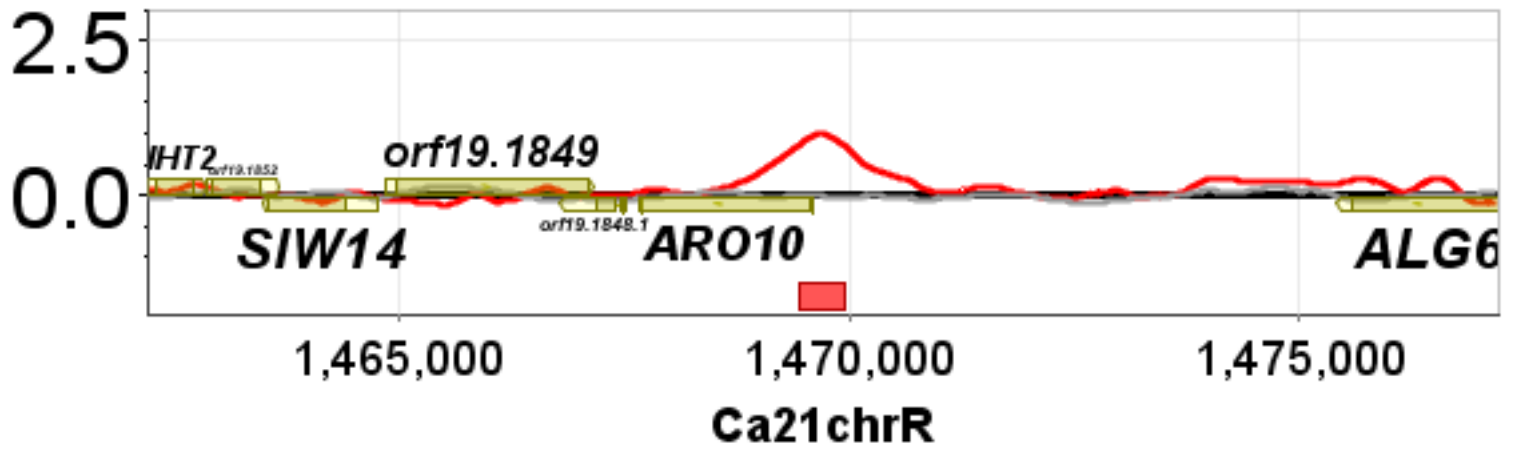

[0.988] Ca21chr5:768650-783649 [+] [ntar\_918, ntar\_917, orf19.2637, orf19.6654, orf19.2638]

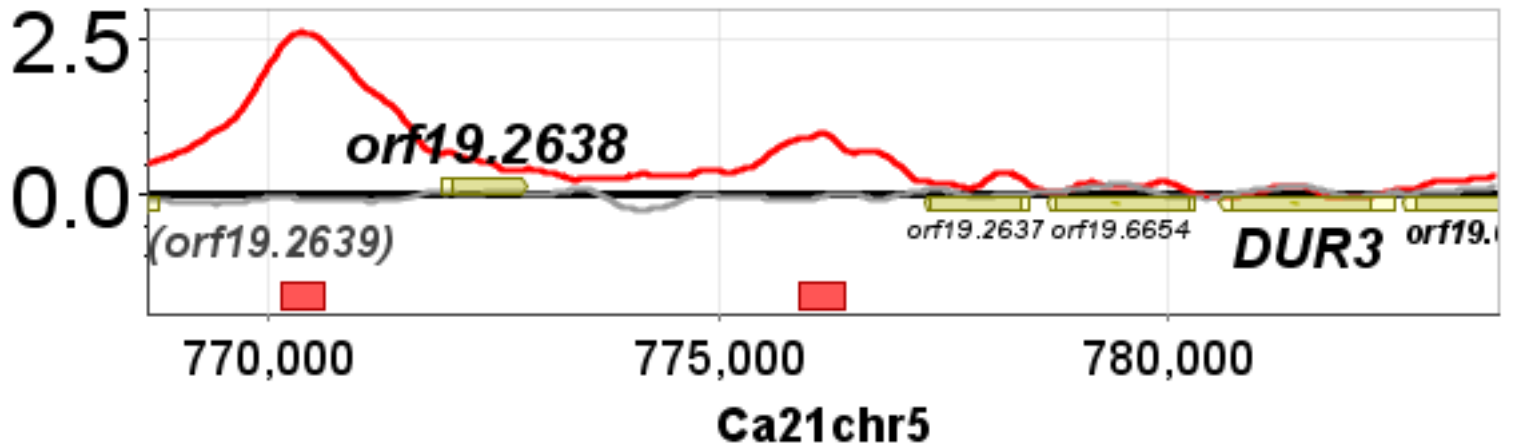

[0.986] Ca21chr7:440945-455944 [+] [ntar\_1102, CUP9, ntar\_1103, ntar\_1101, HSP90]

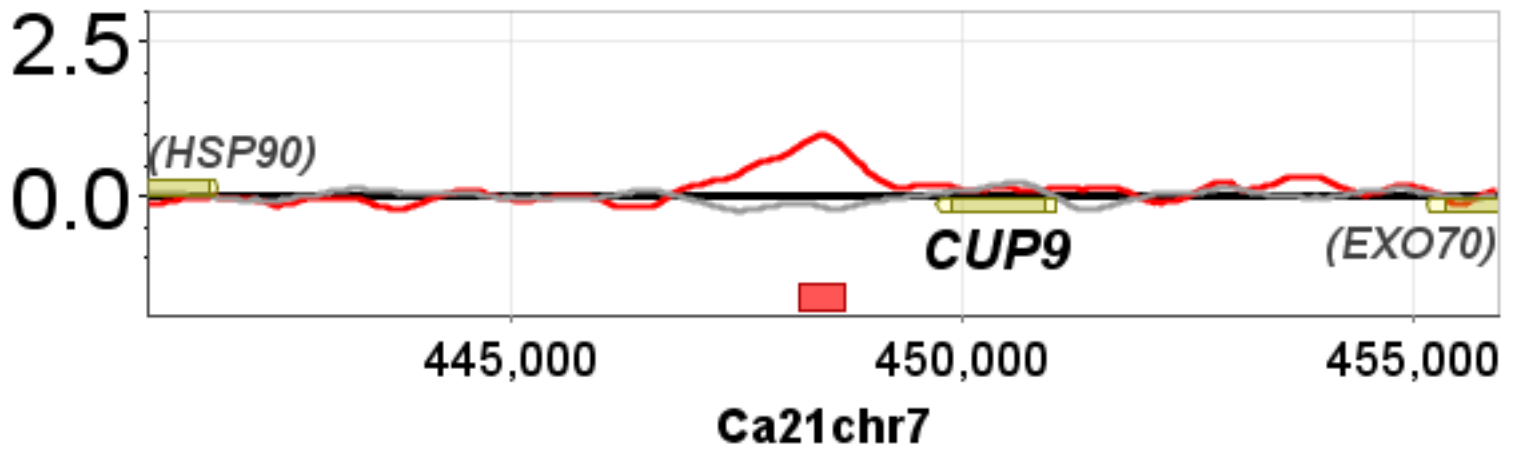

[0.985] Ca21chr6:263413-278412 [+] [ntar\_981, ntar\_980, orf19.3448, orf19.3447, orf19.3449]

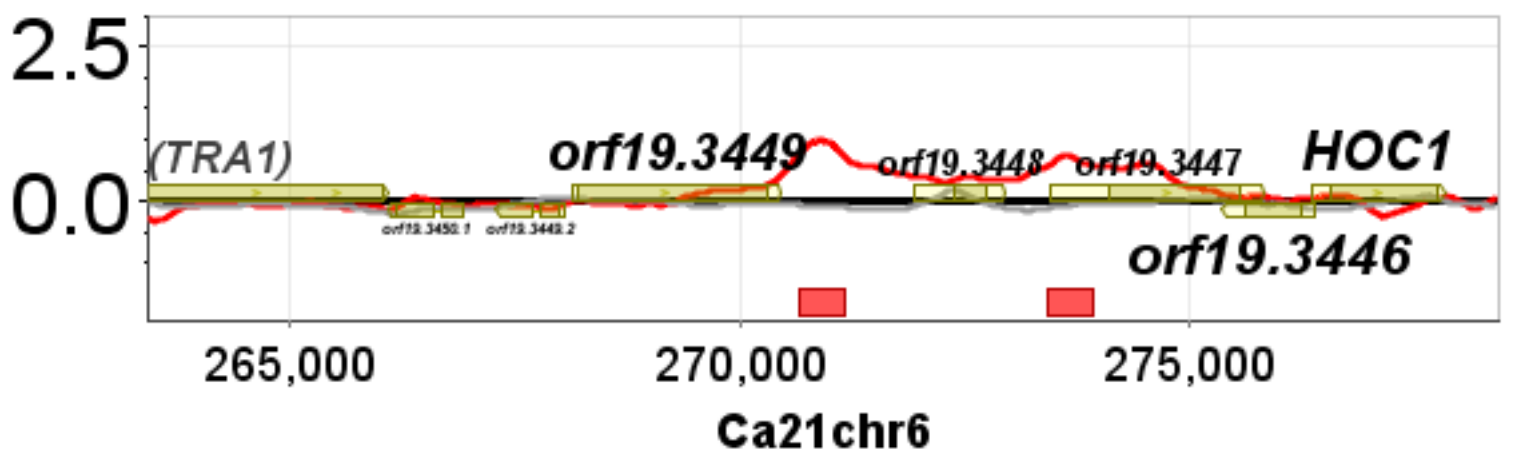

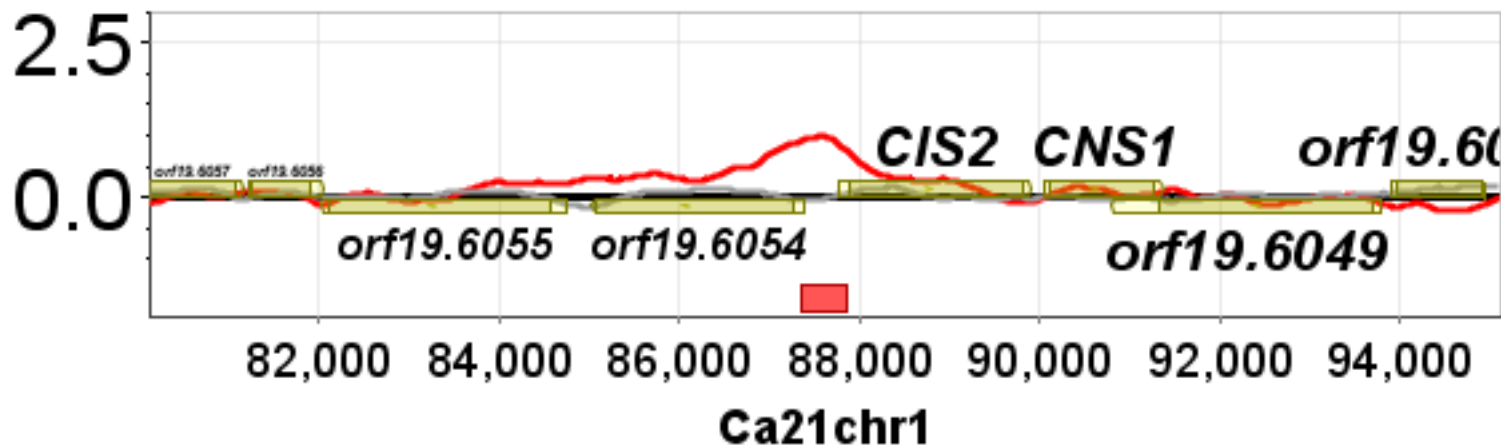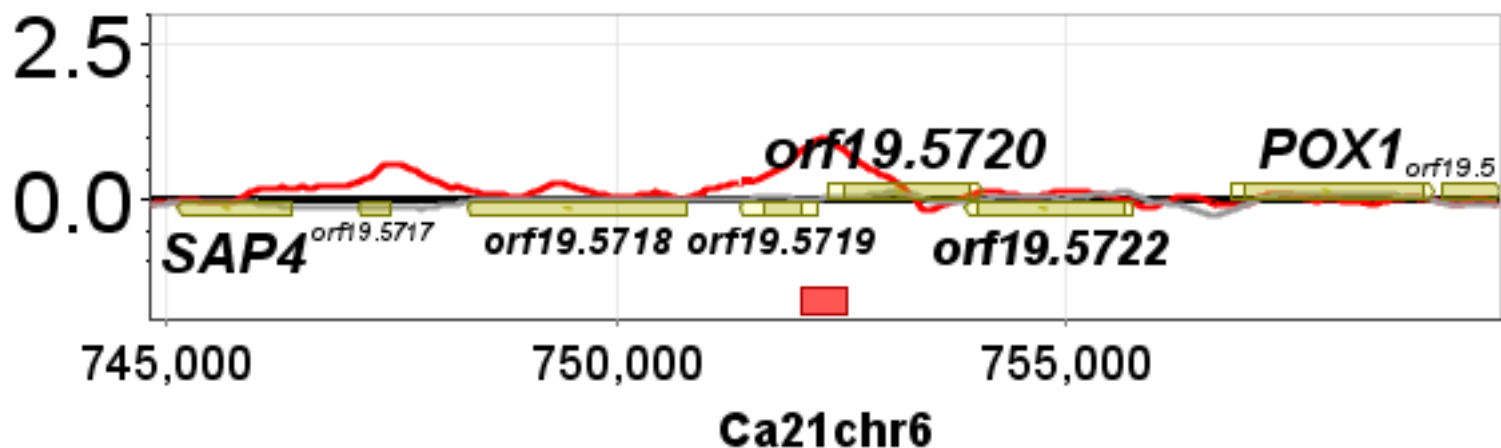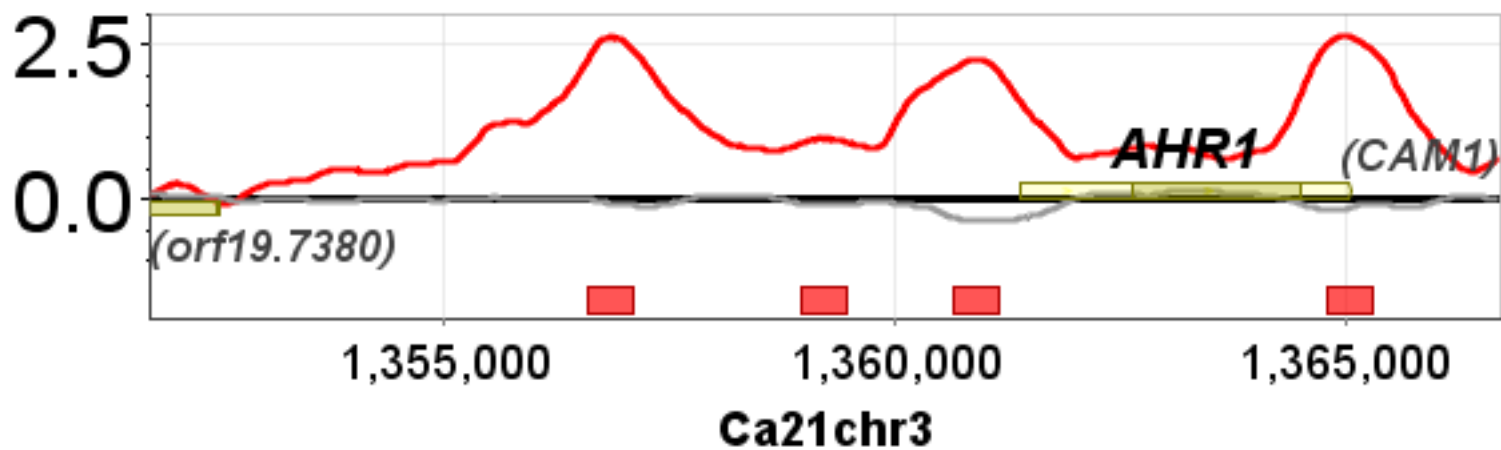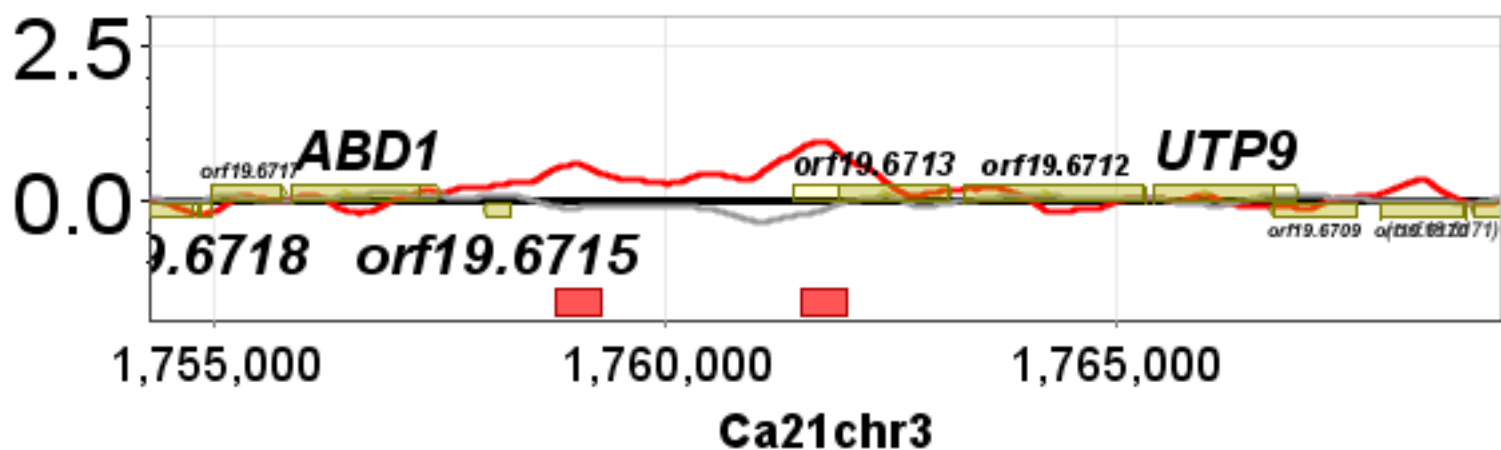

[0.952] Ca21chr4:556244-571243 [+] [orf19.2726, orf19.2725, ntar\_769, GRX3, orf19.2728]

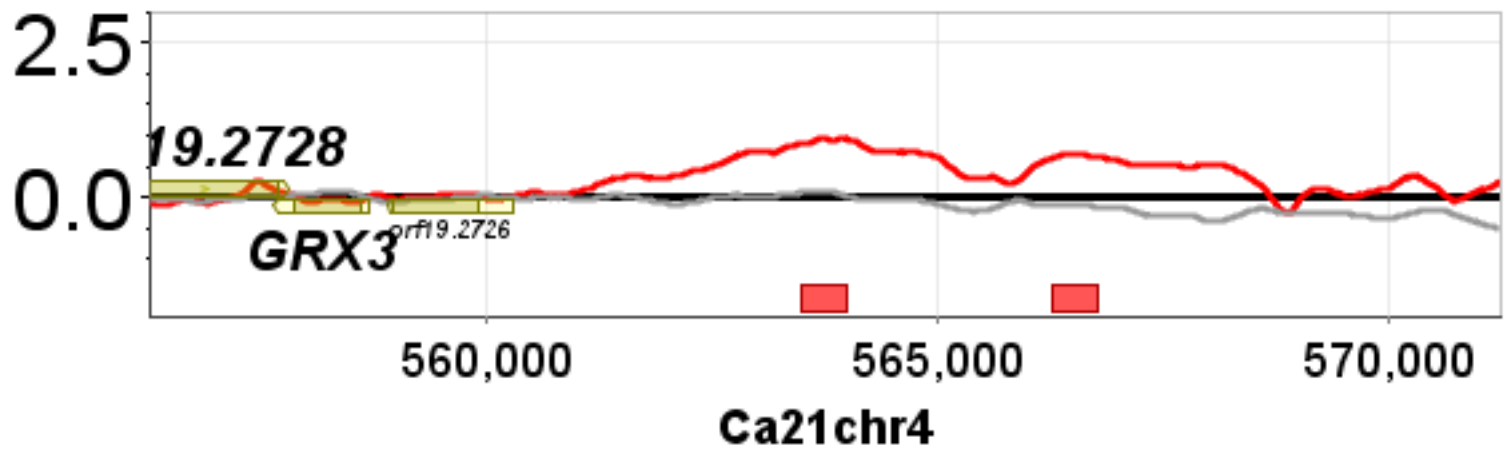

[0.946] Ca21chr4:1418829-1433828 [+] [orf19.2892, orf19.2893, VMA8, orf19.2891, orf19.2890]

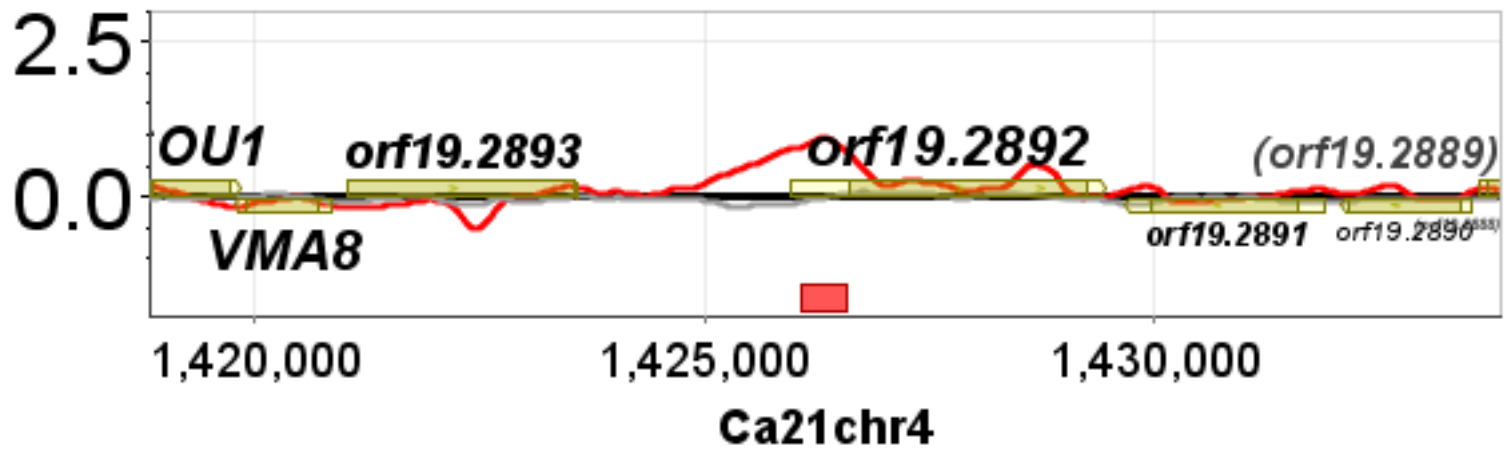

[0.945] Ca21chrR:1011322-1026321 [+] [orf19.1737, ntar\_1268, UGP1, orf19.1736, ts(gcu)2]

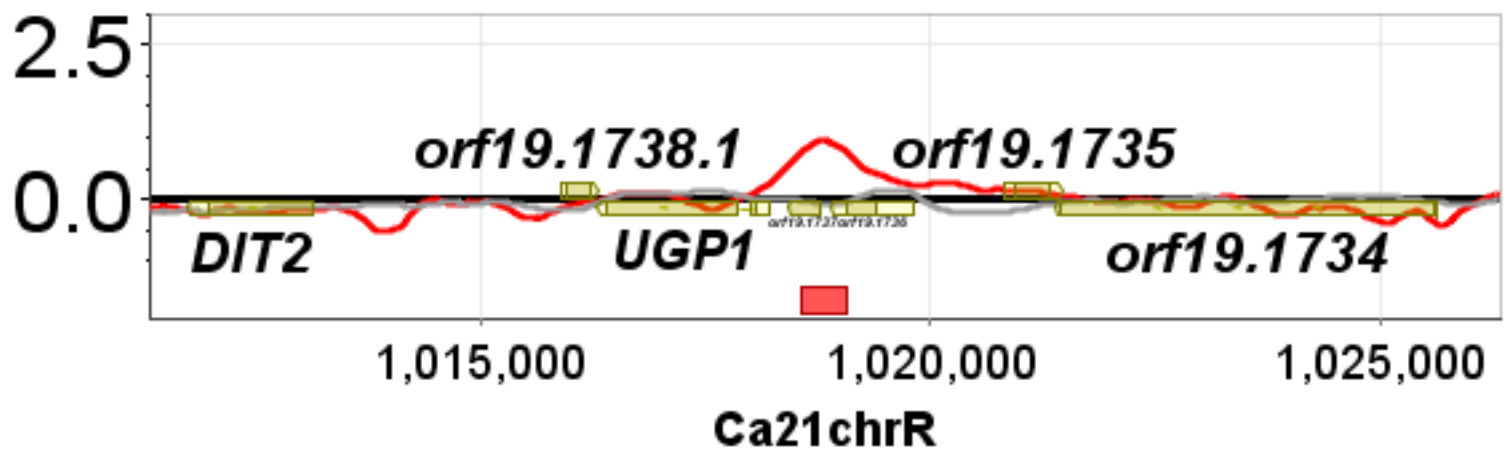

[0.942] Ca21chr3:1211891-1226890 [+] [orf19.6983, ntar\_633, ntar\_632, orf19.6984]

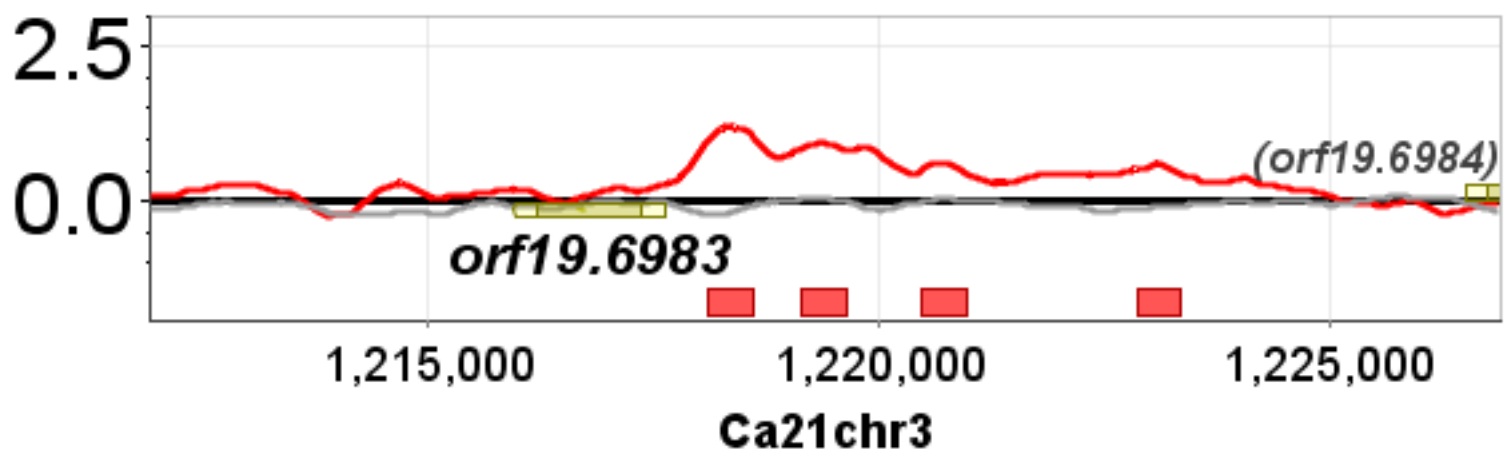

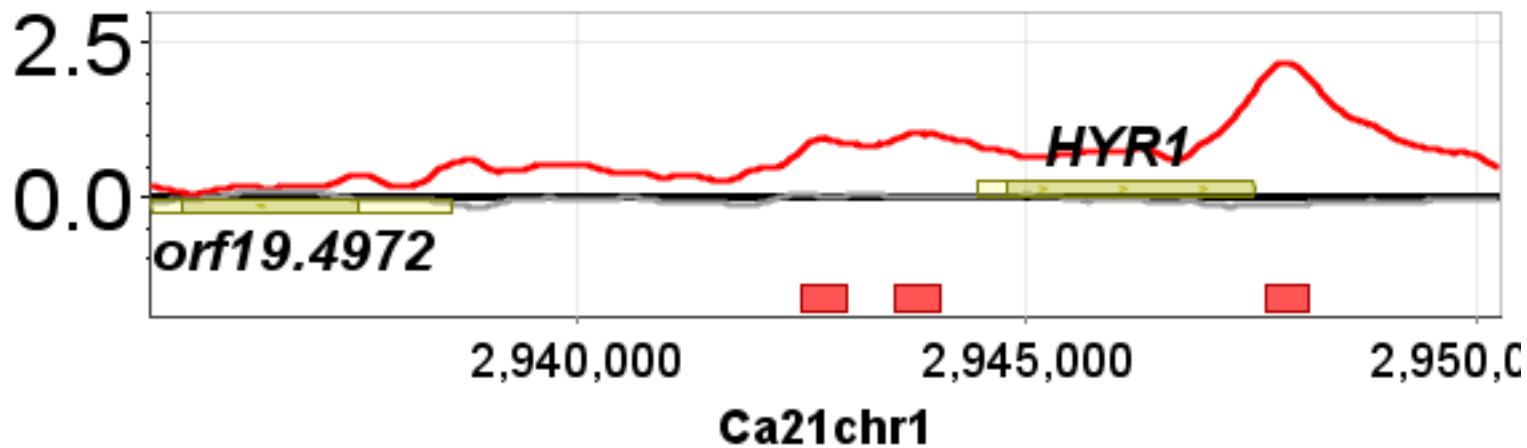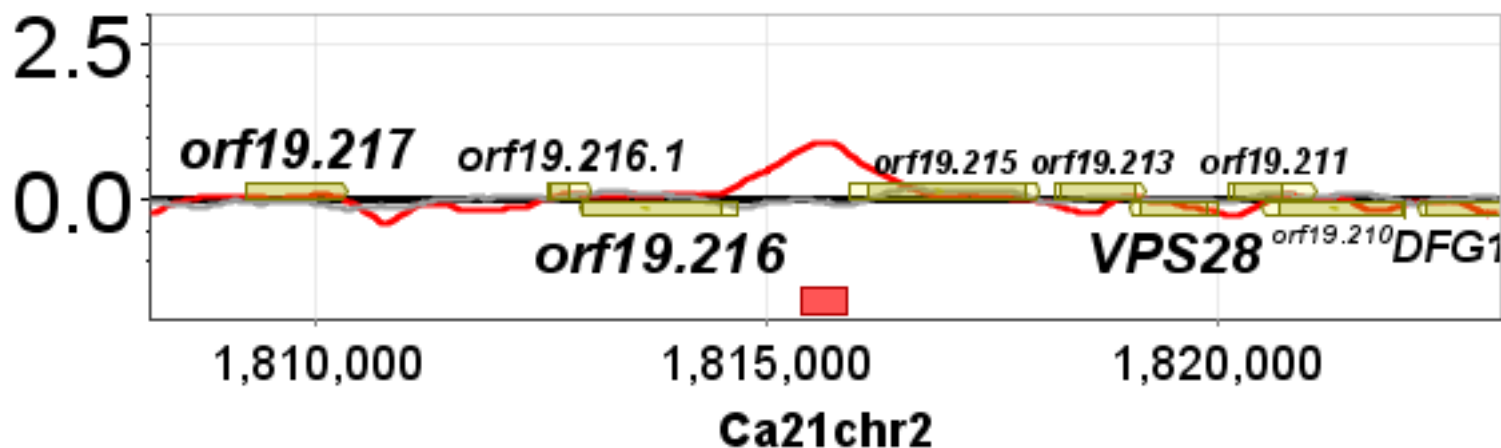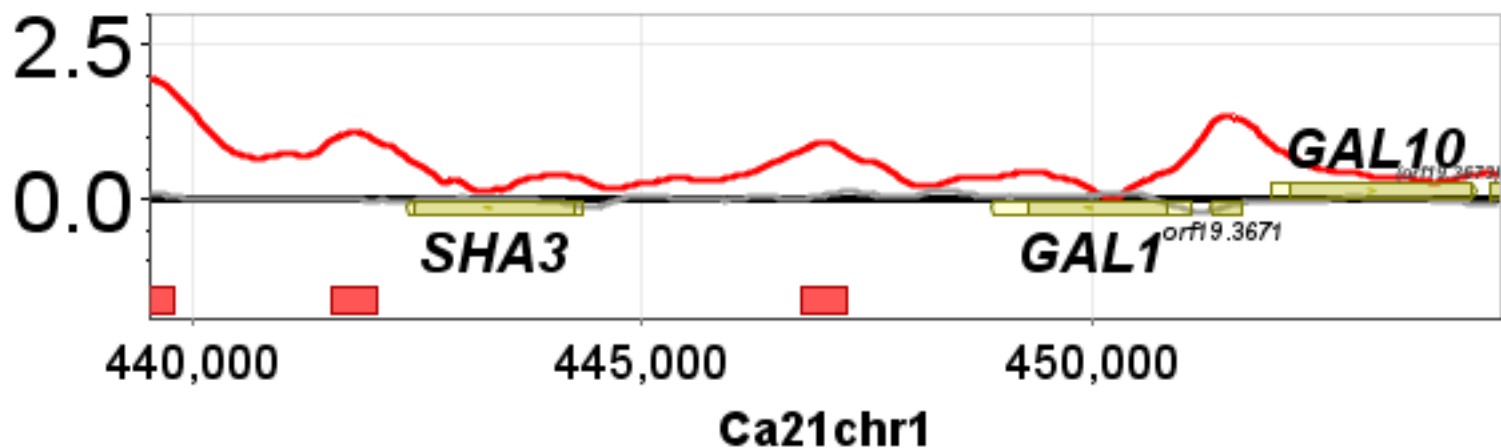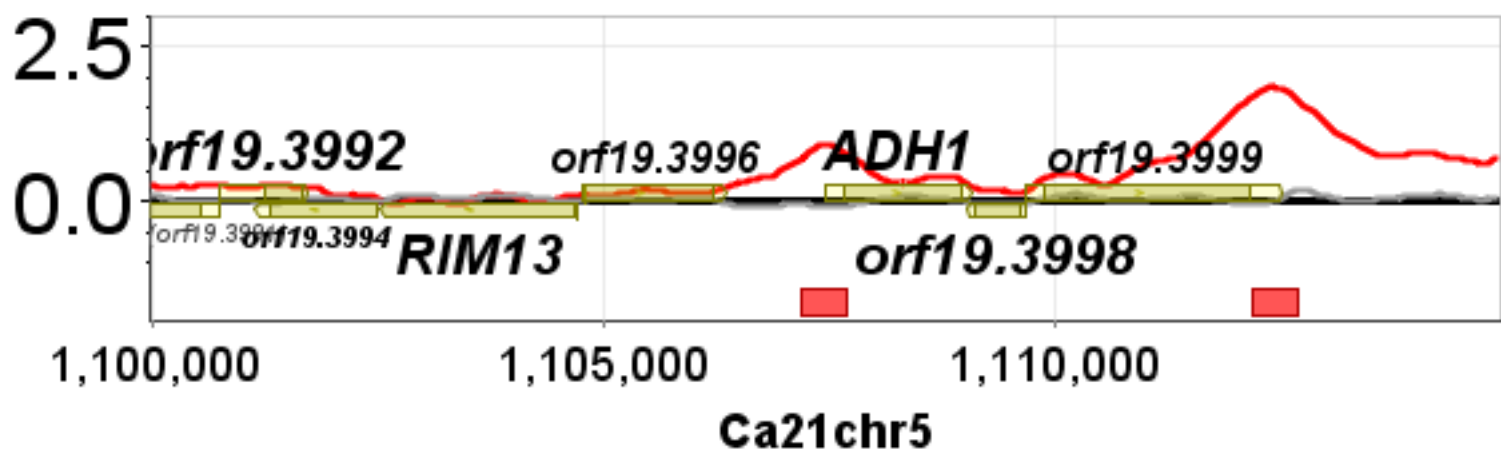

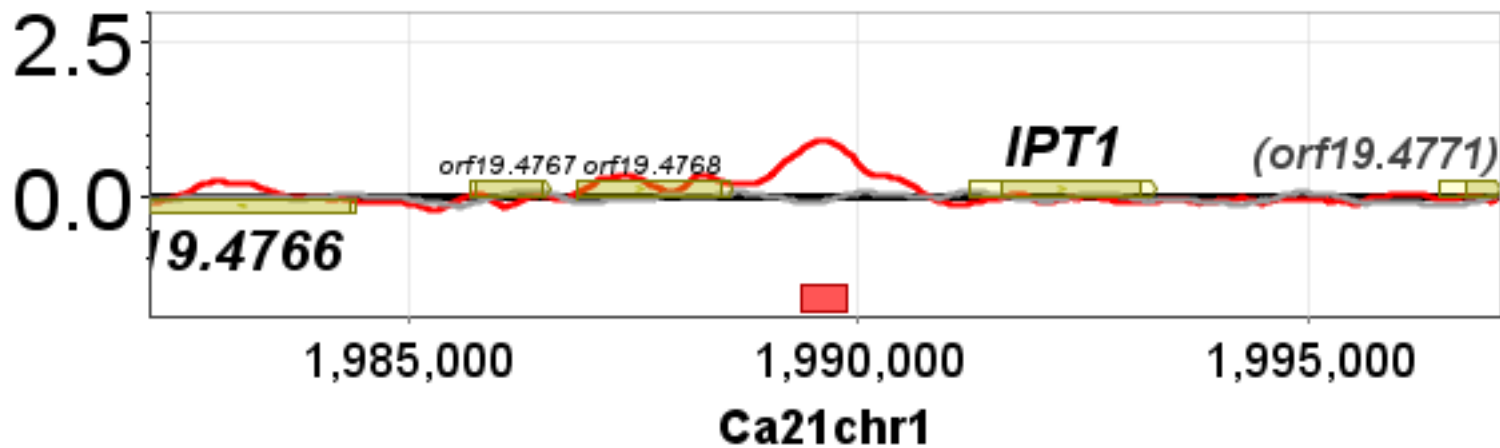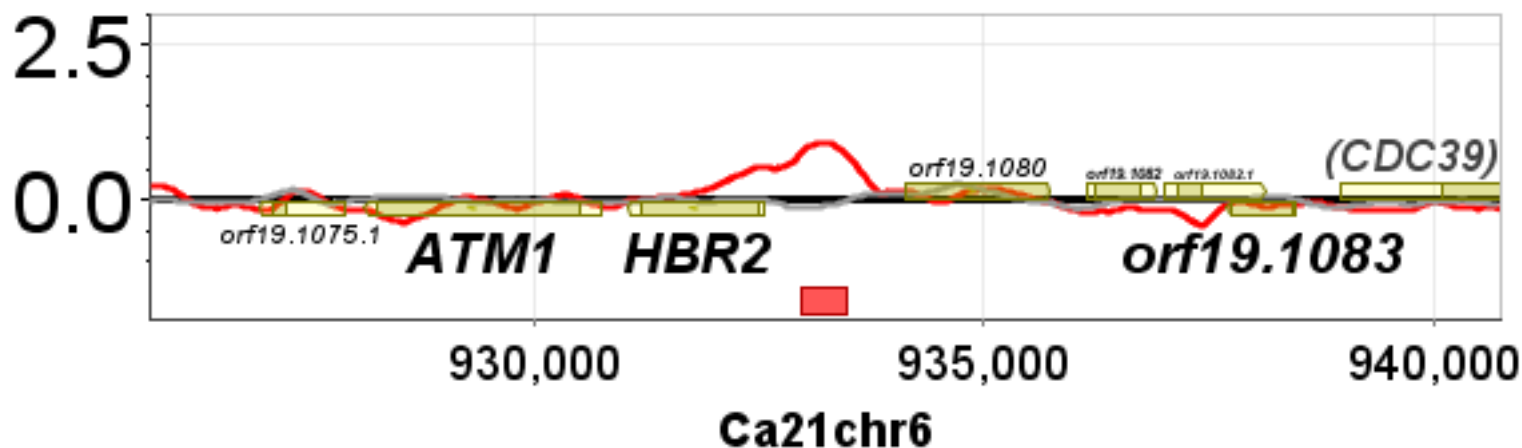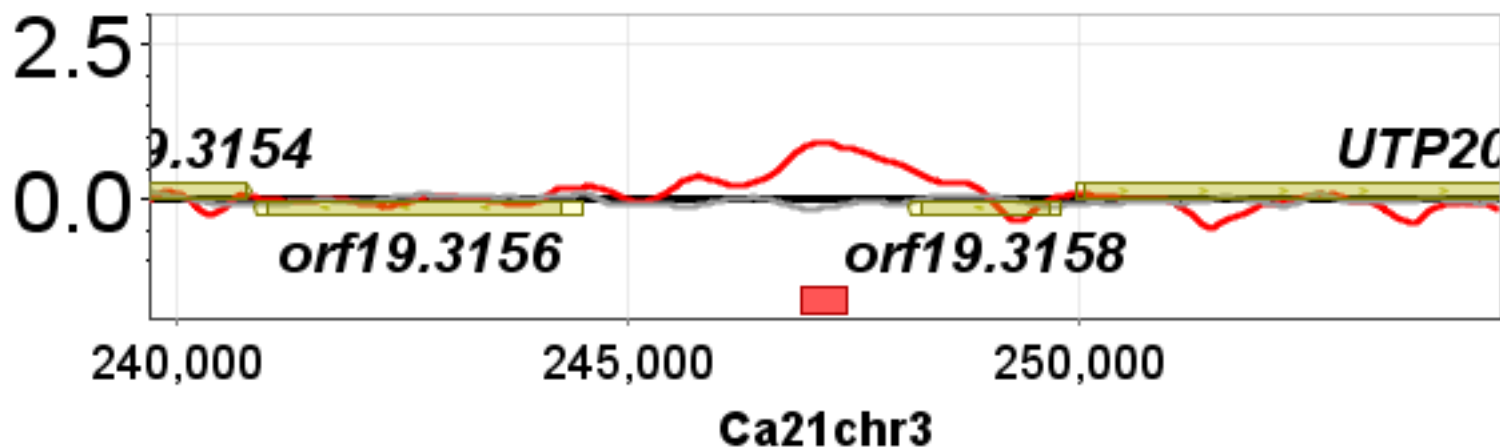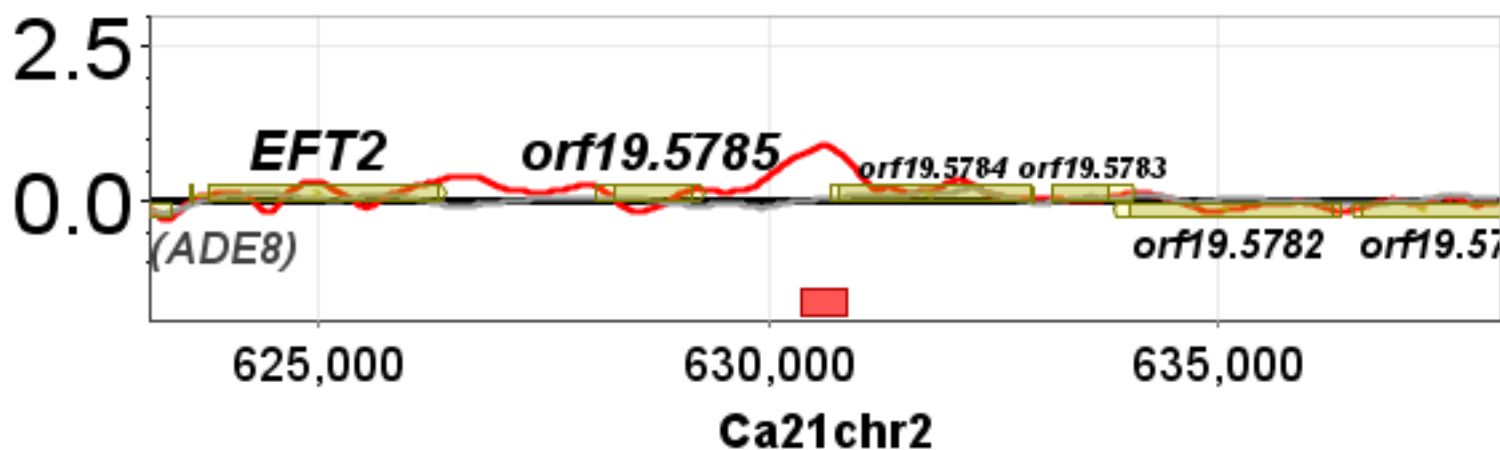

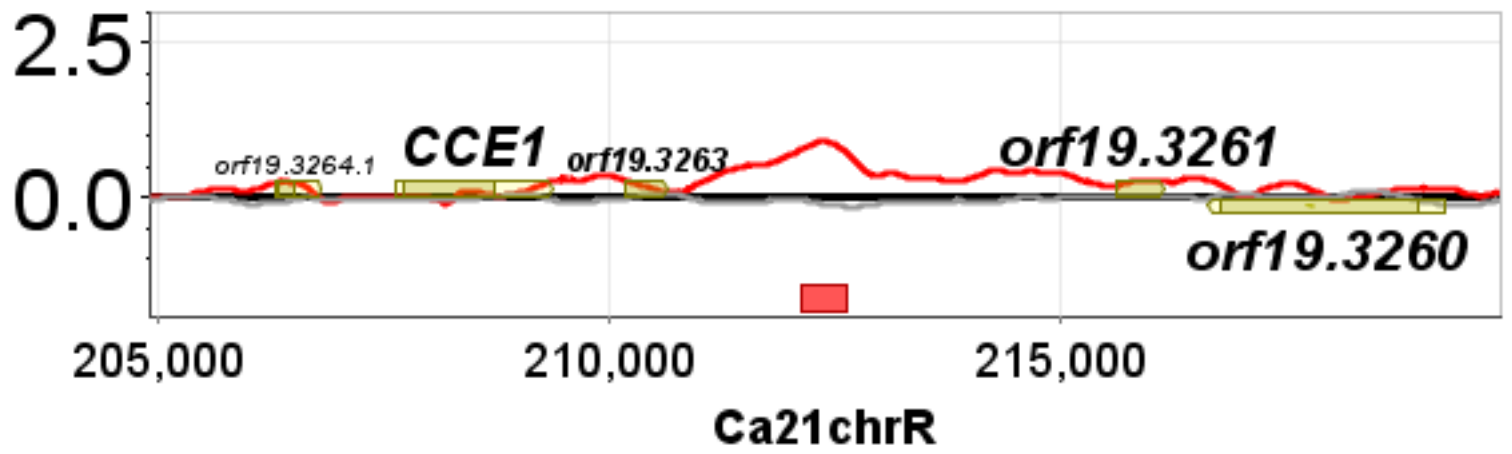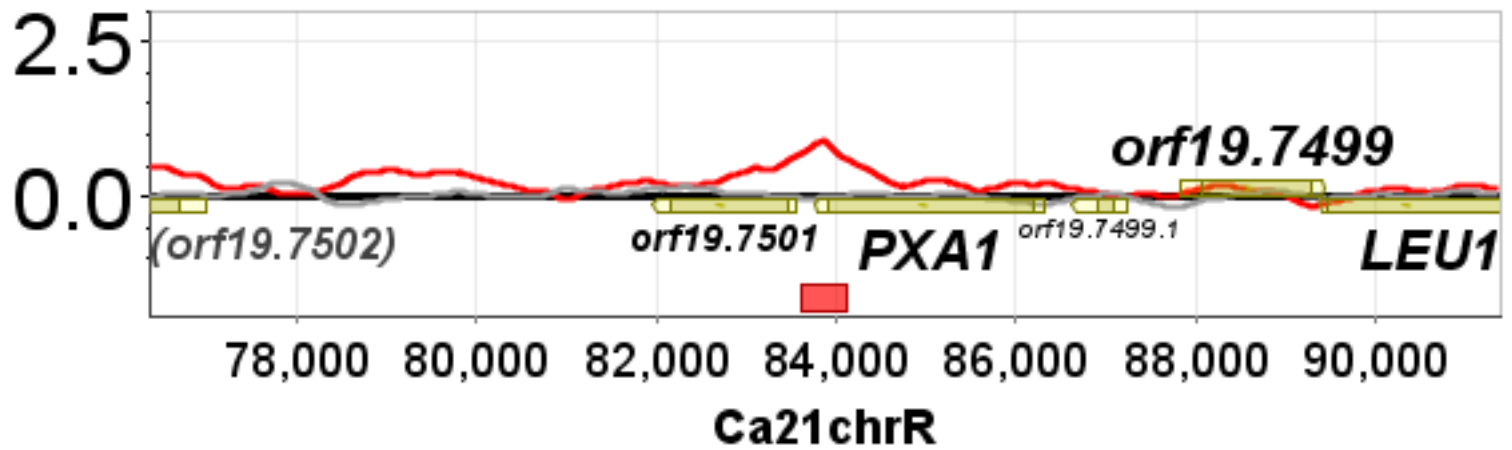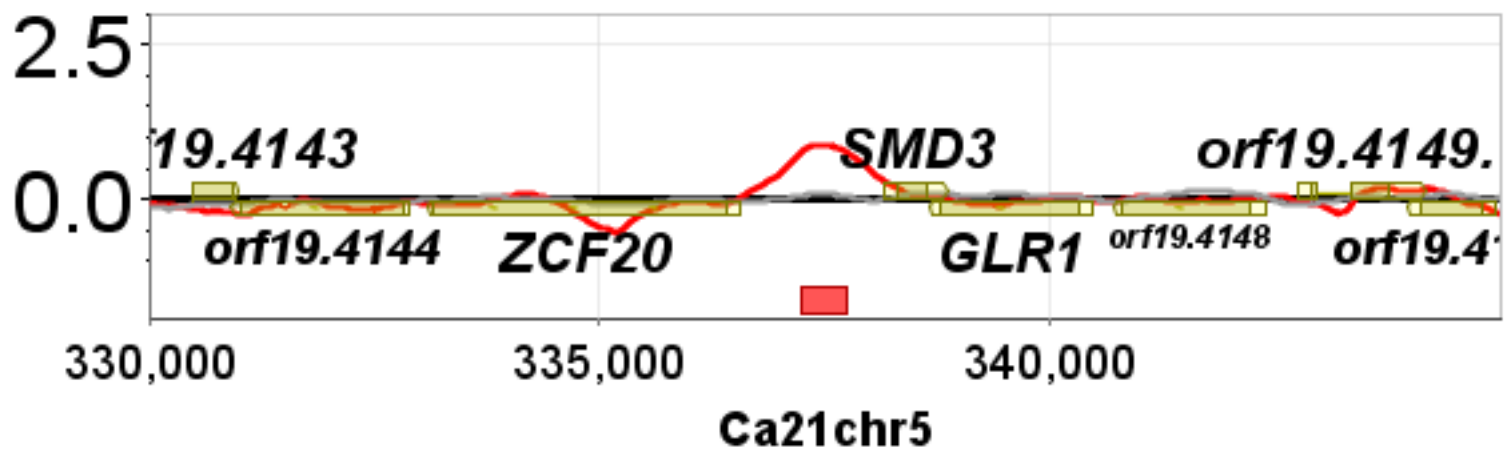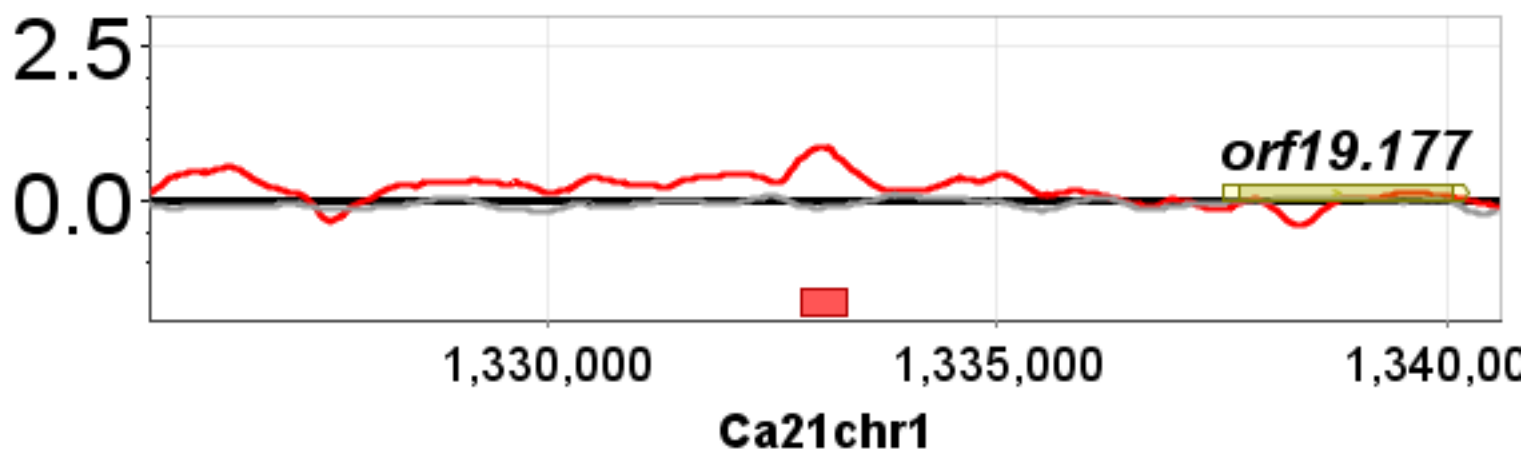

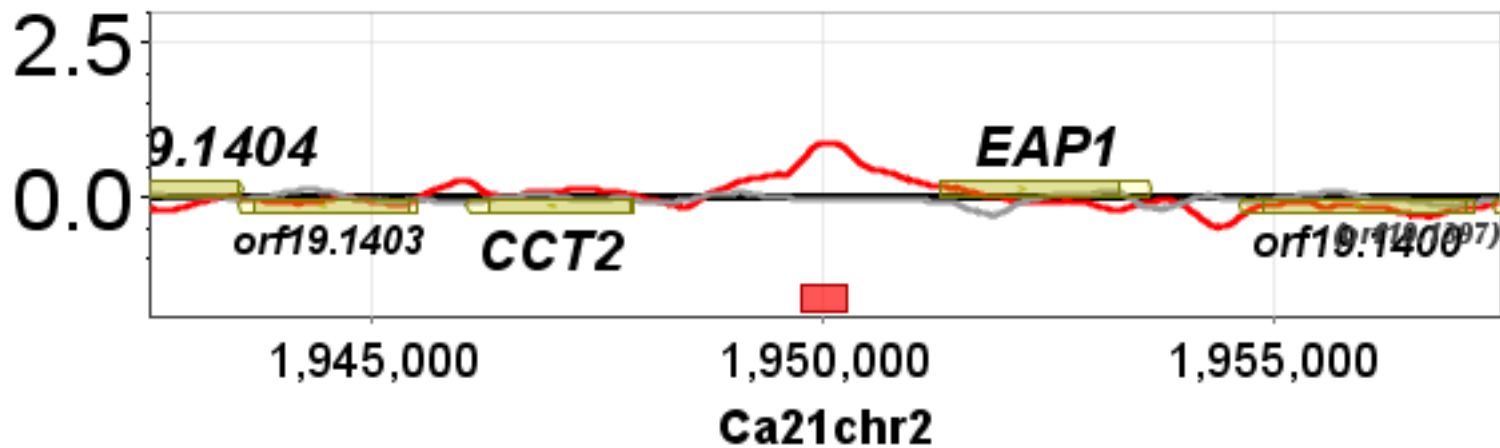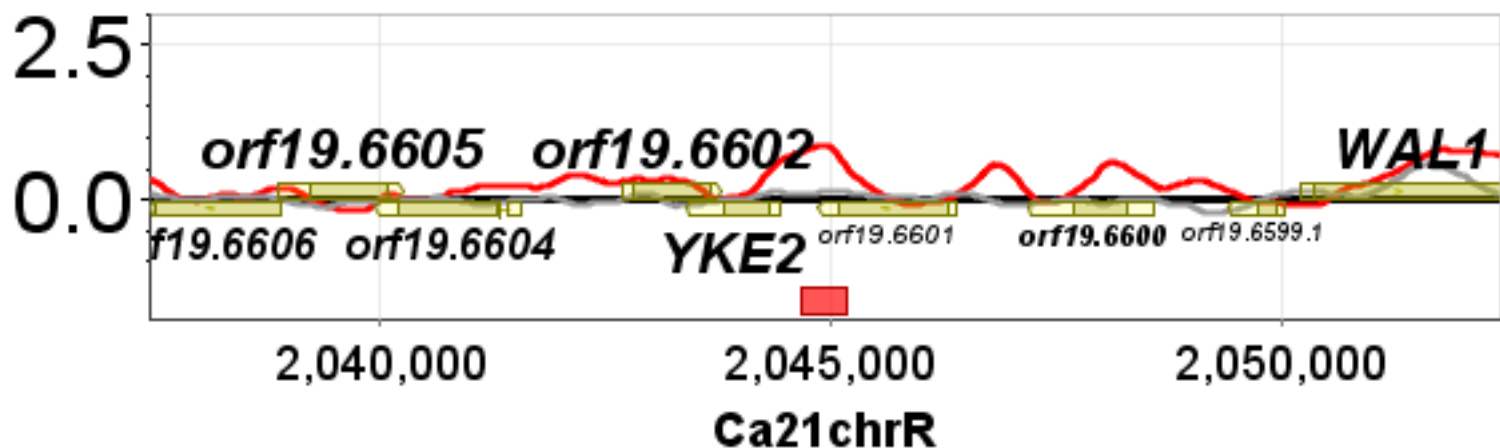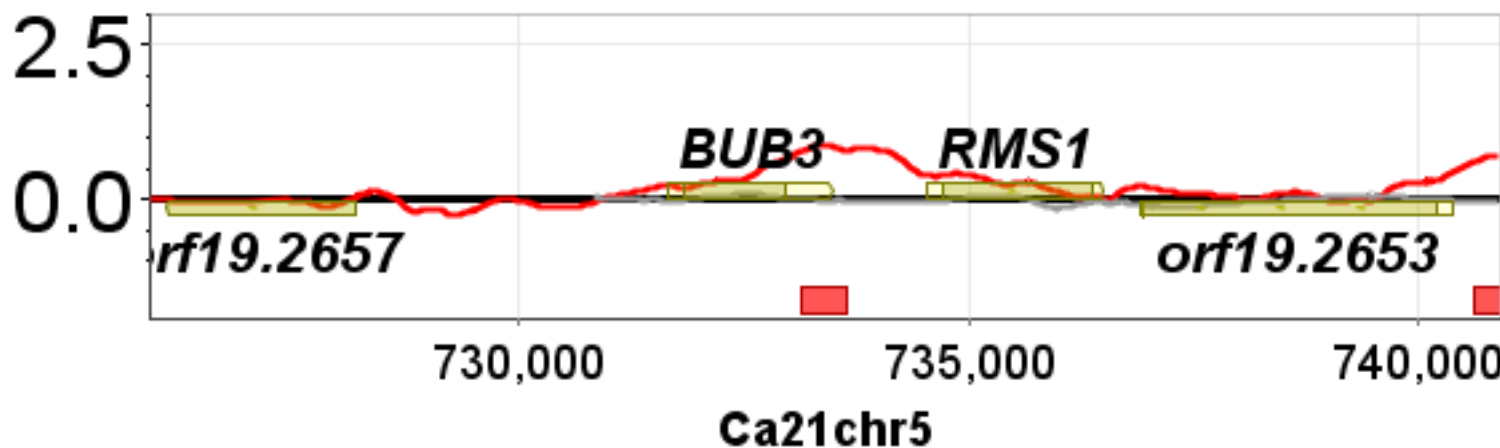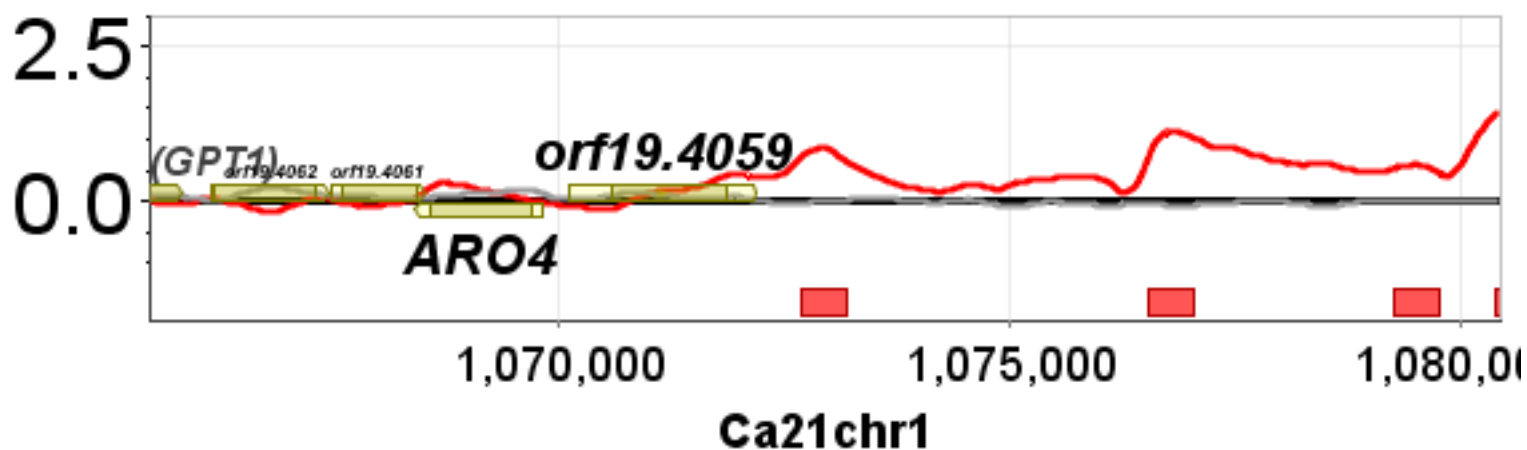

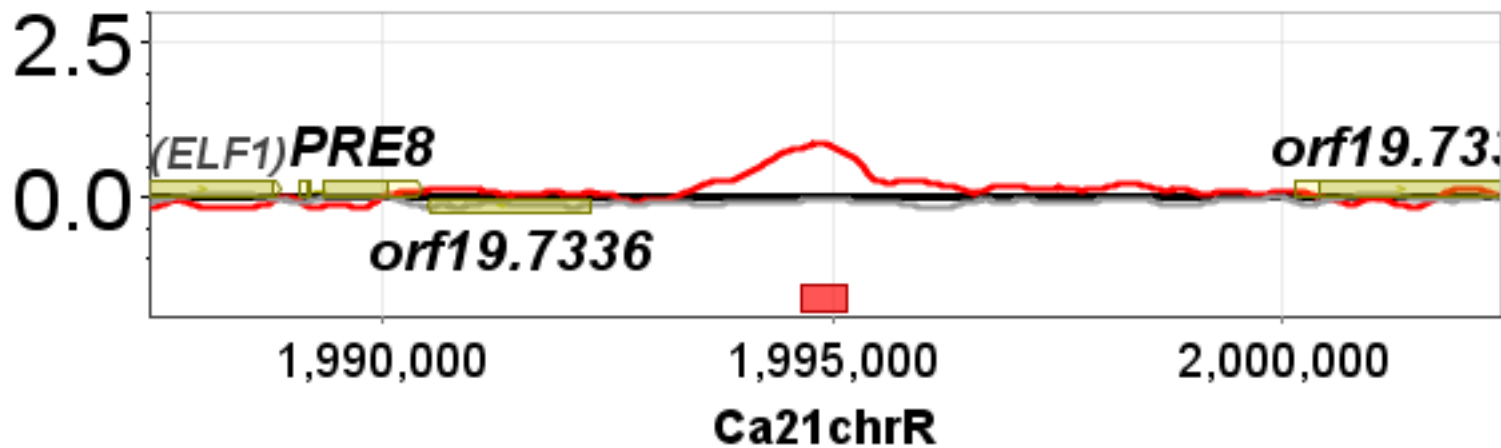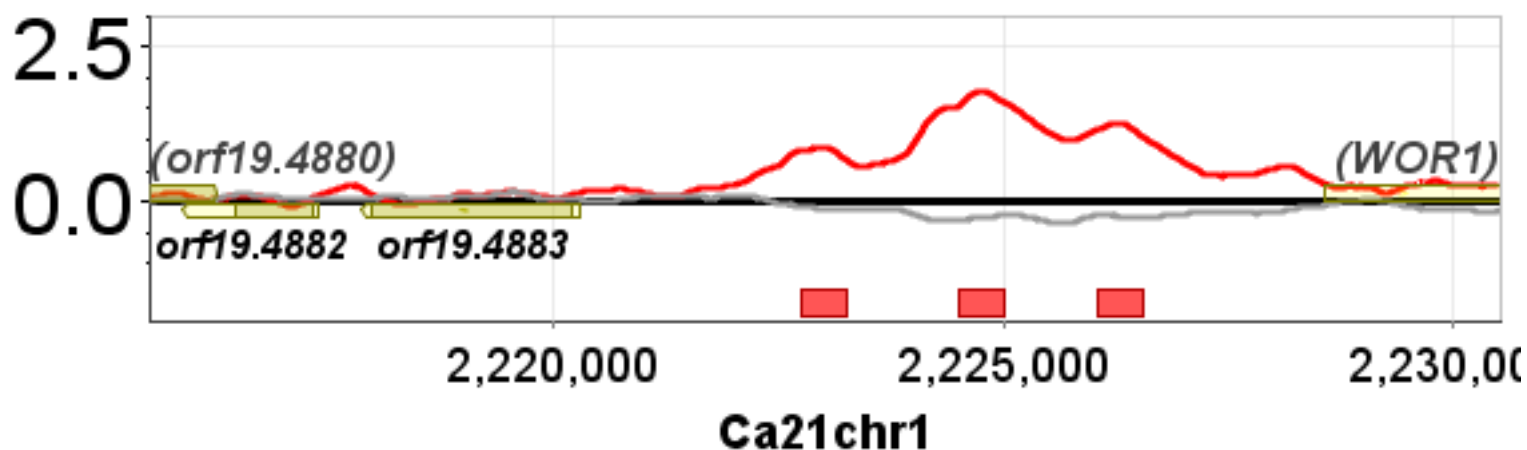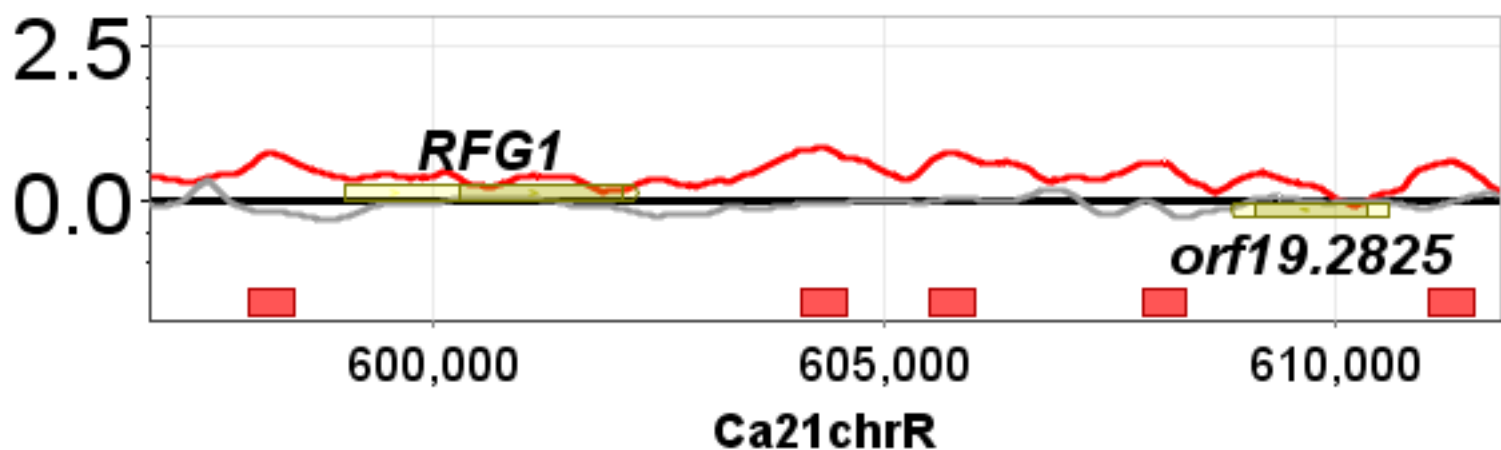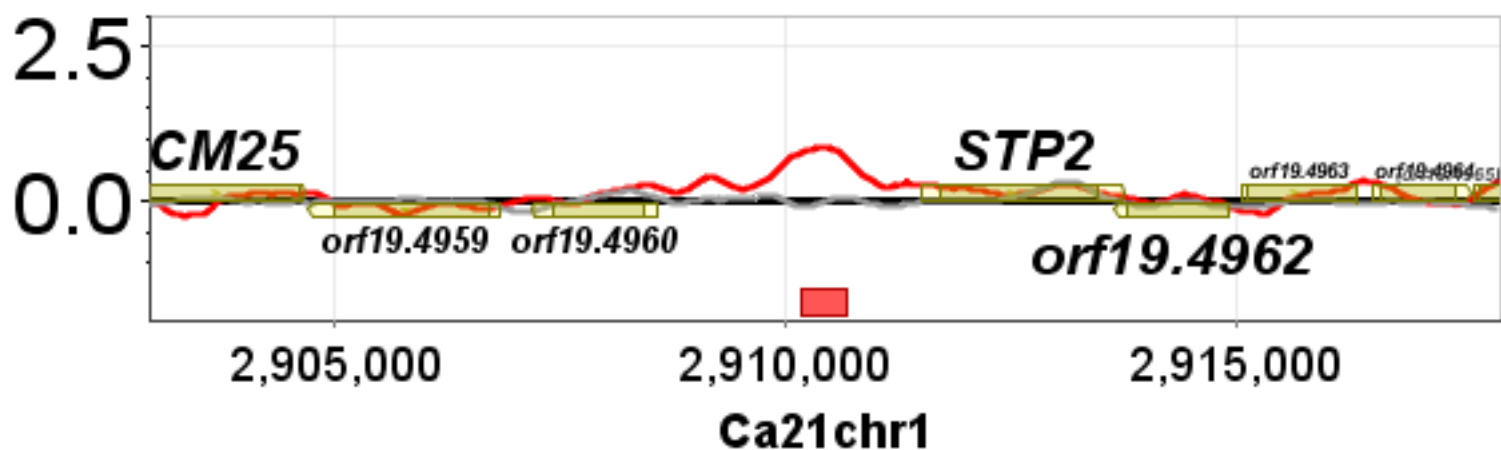





[0.835] Ca21chr3:848623-863622 [+] [SBP1, orf19.913.2, orf19.5854.1, CDR11, MBP1]

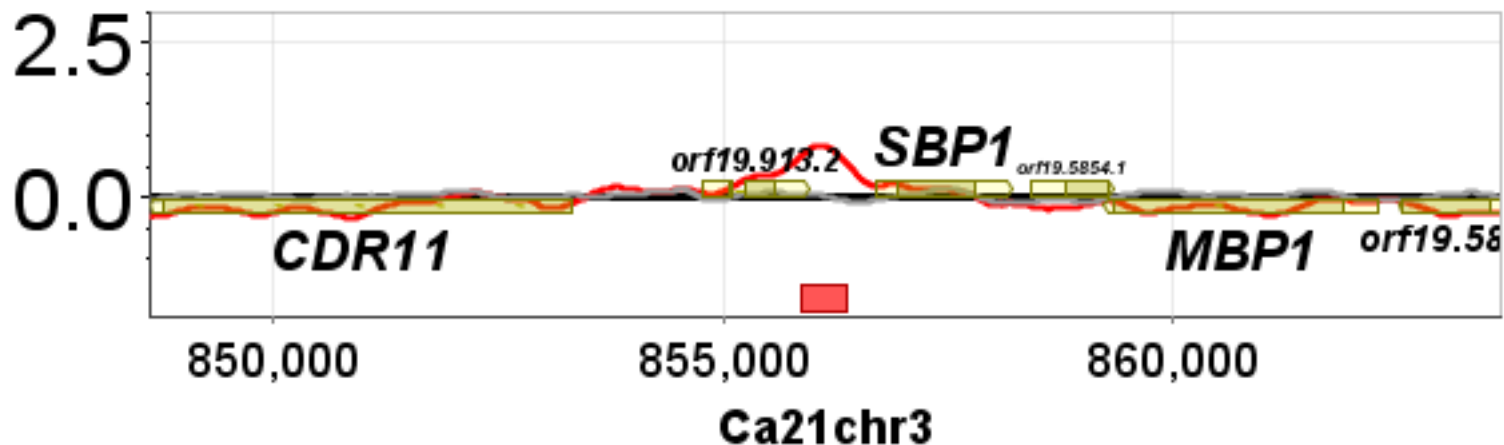

[0.832] Ca21chr5:100746-115745 [+] [Intar\_854, orf19.936, AGA1, orf19.937, orf19.938]

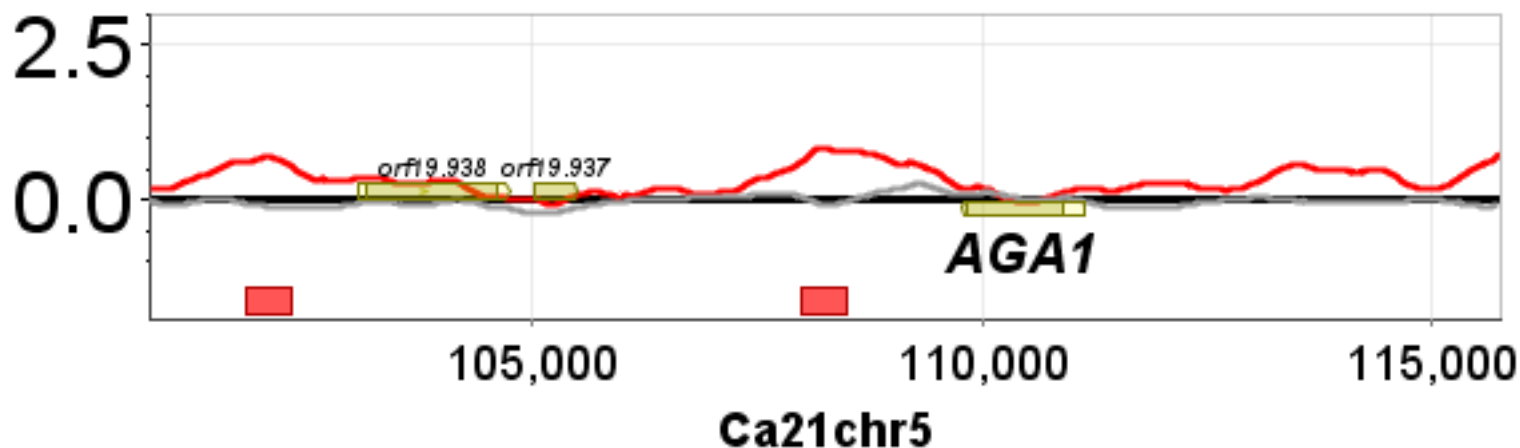

[0.832] Ca21chr7:277148-292147 [+] [ntar\_1082, ntar\_1081, orf19.6920, orf19.6919, orf19.6921]

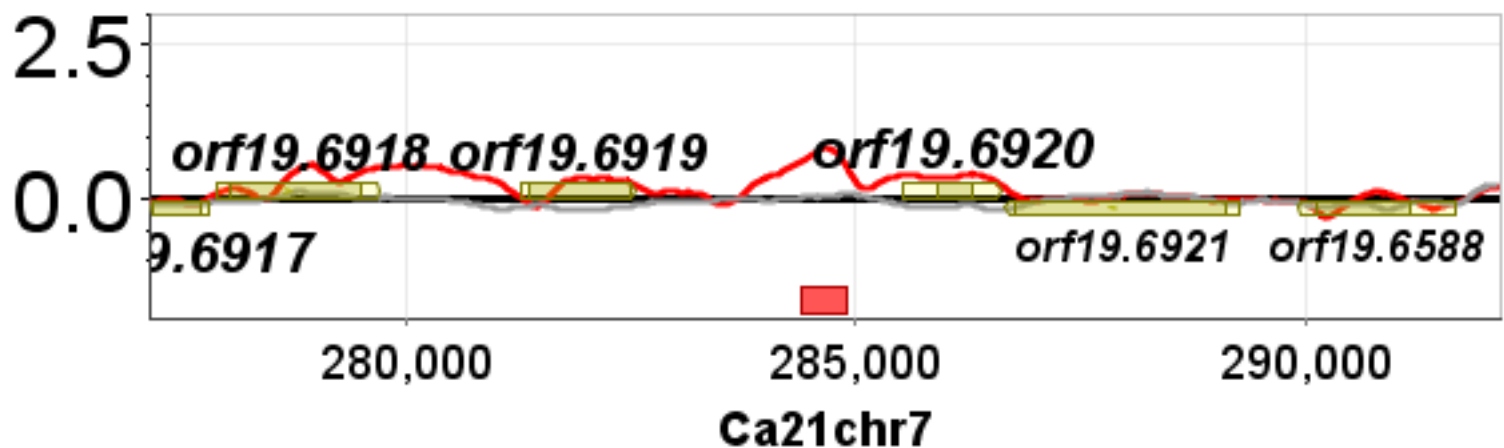

[0.827] Ca21chr1:2845762-2860761 [+] [orf19.4936, orf19.4936.1, ntar\_257, OP4, CHS3]

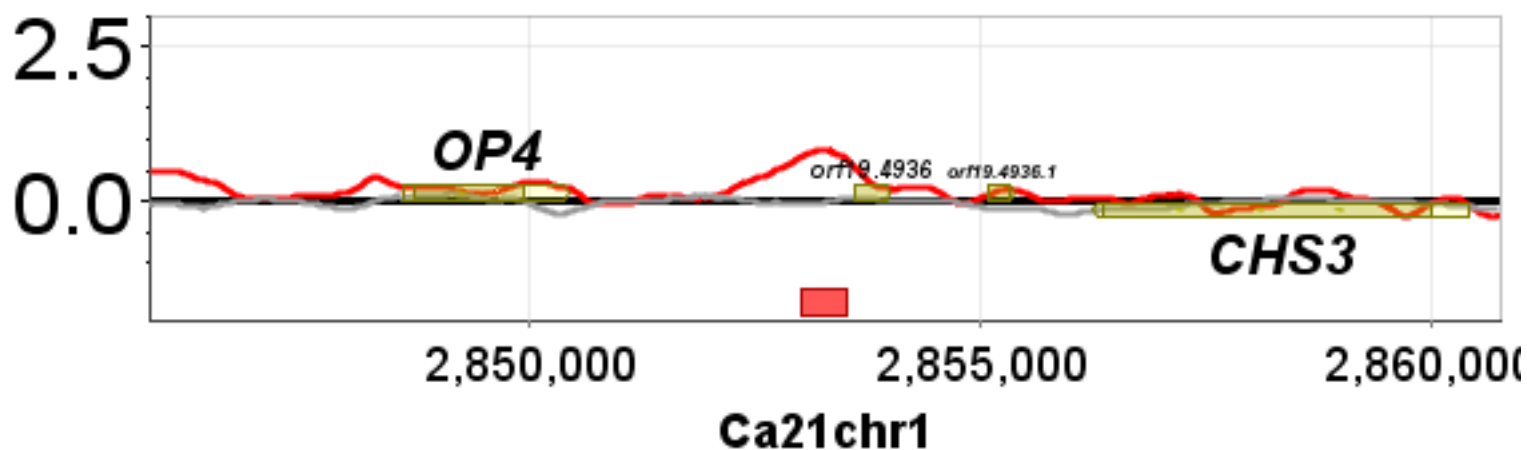

[0.822] Ca21chrR:27668-42667 [+] [orf19.7522, REP1, MKC1, POT1, orf19.7518]

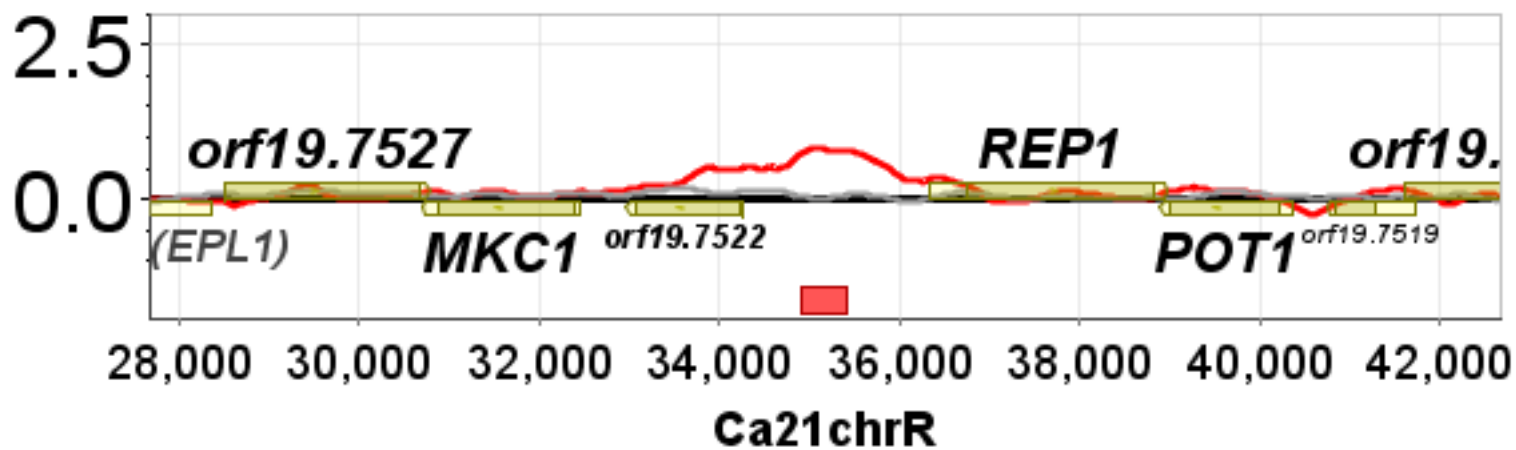

[0.815] Ca21chr2:1024846-1039845 [+] [ntar\_387, ITR1, CYT1, ntar\_386, CRK1]

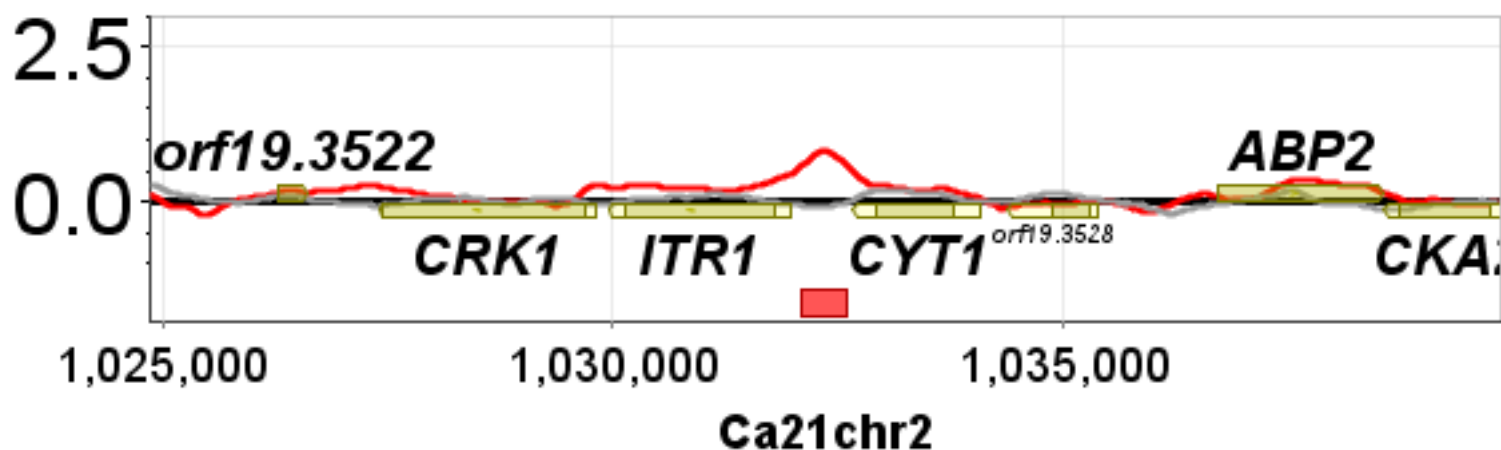

[0.801] Ca21chr3:702867-717866 [+] [ntar\_583, orf19.334, orf19.335, FCY2, YAH1]

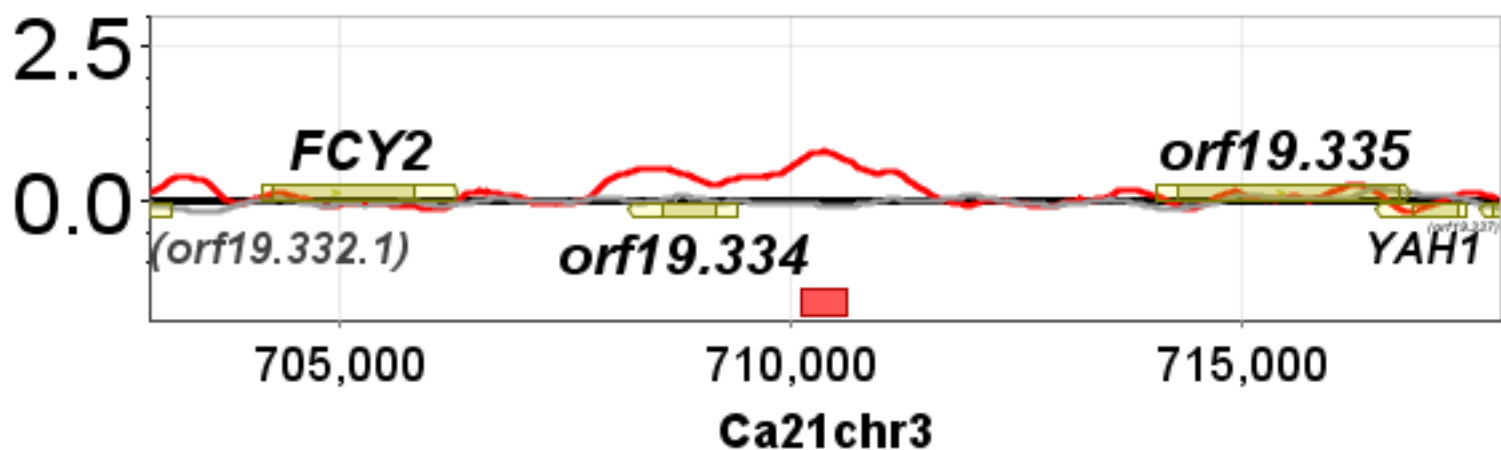

[0.797] Ca21chrR:865353-880352 [+] [orf19.467, IFF9]

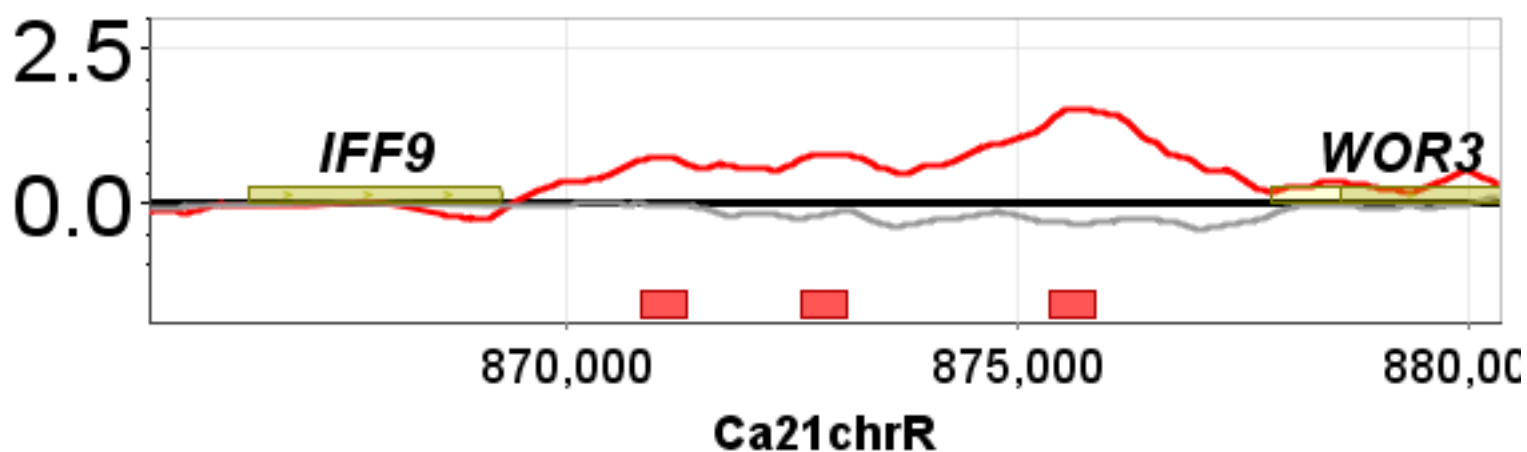

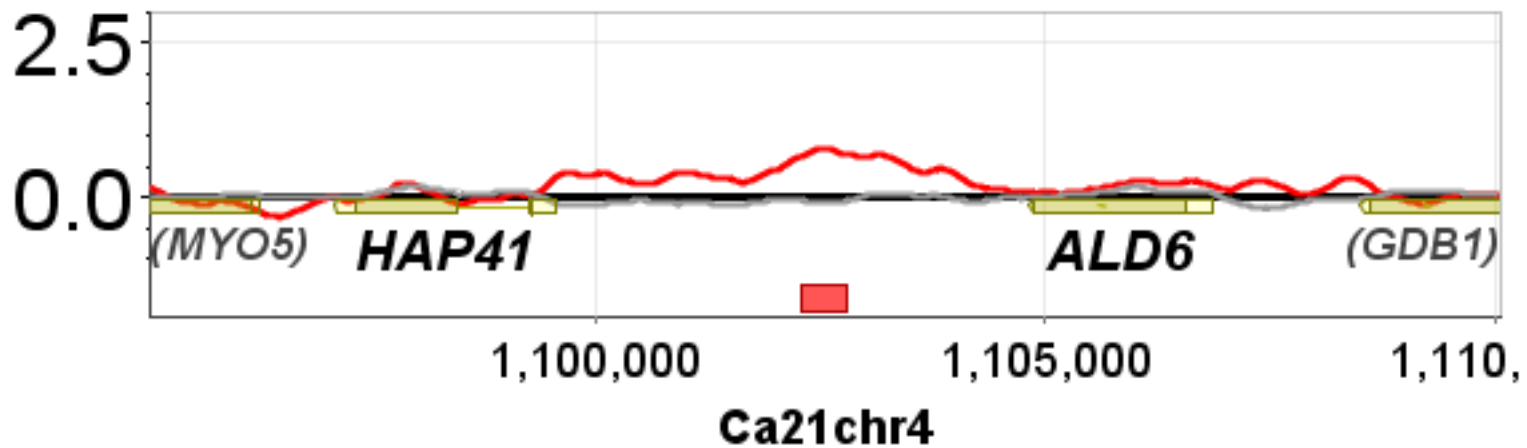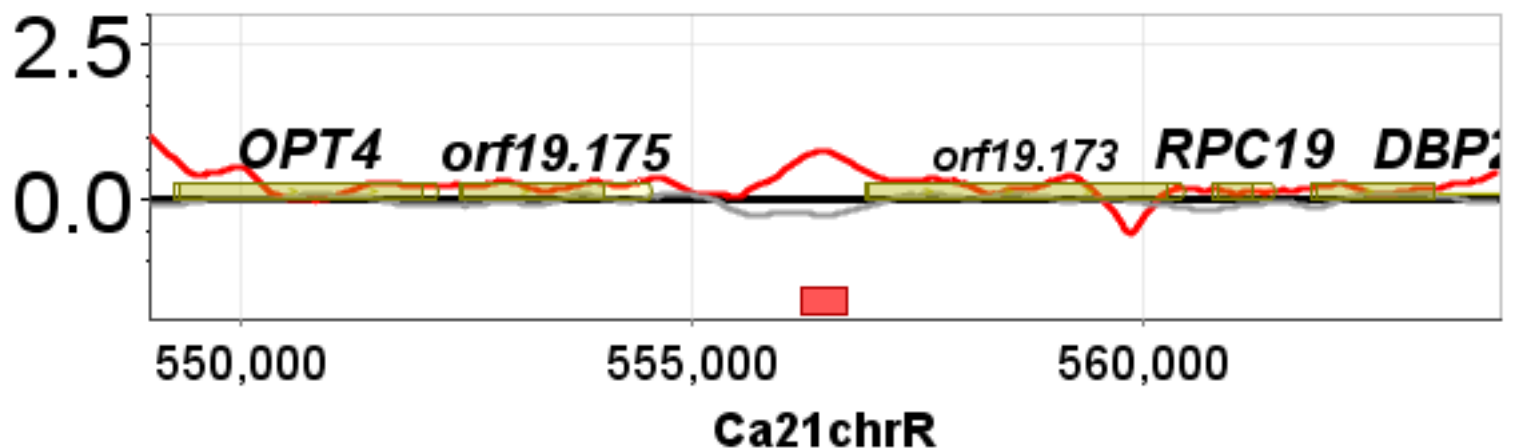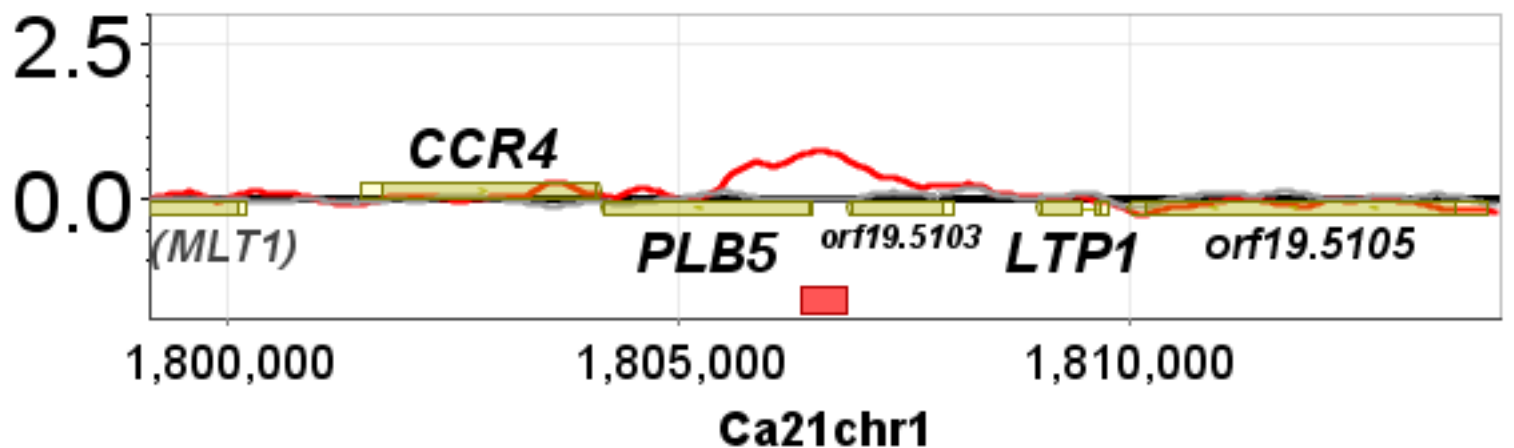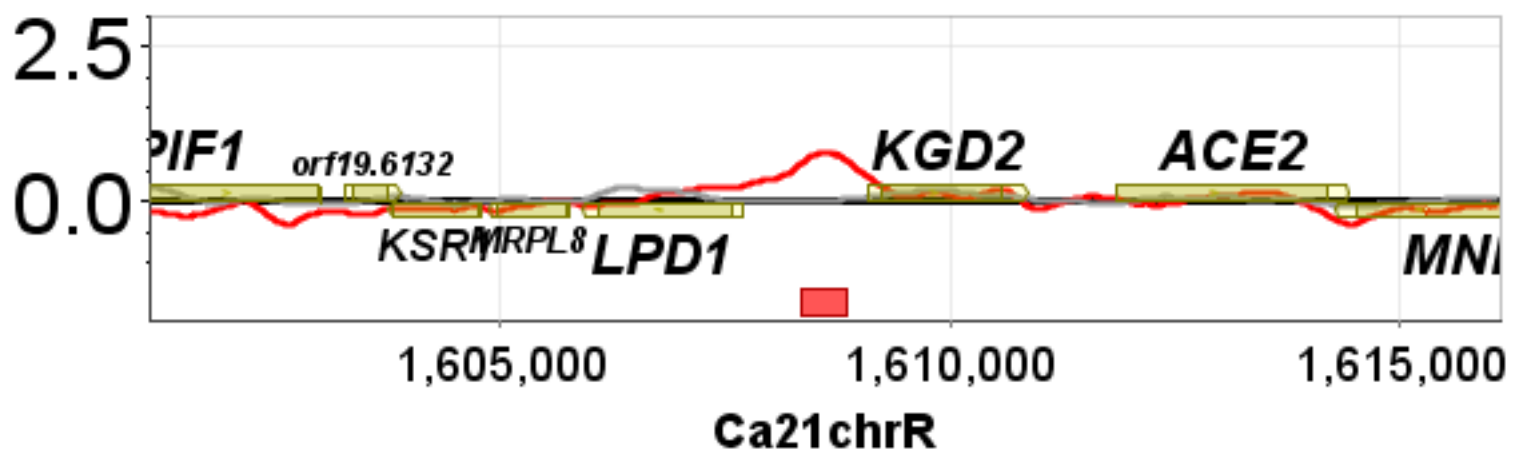

[0.783] Ca21chrR:598247-613246 [+] [ntar\_1219, ntar\_1220, orf19.2825, ntar\_1222, ntar\_1221]

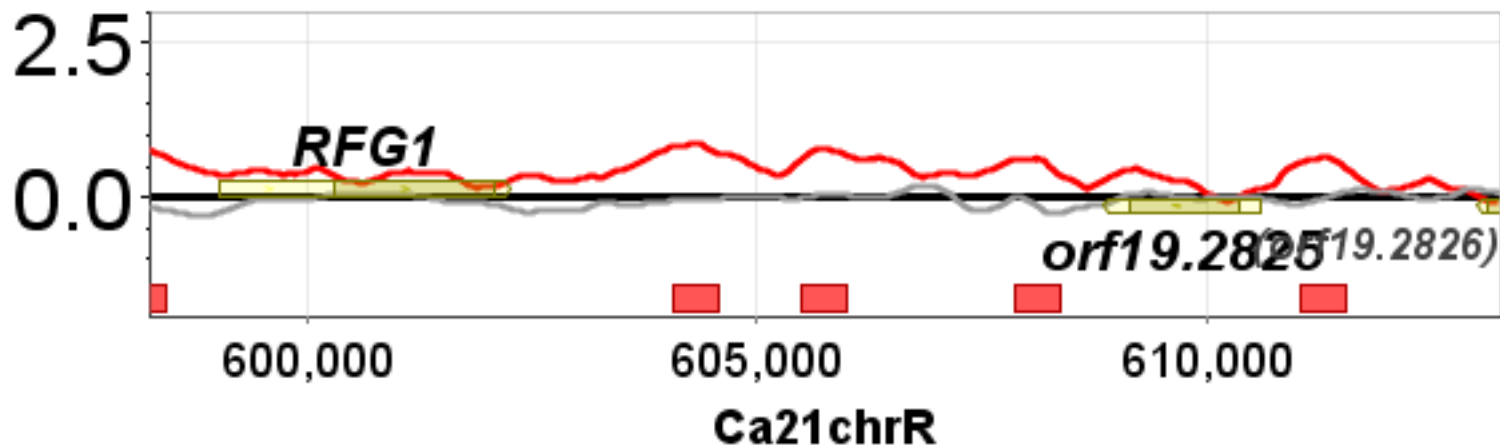

[0.781] Ca21chr1:448748-463747 [+] [GAL7, GAL102, orf19.3673, ABP140, orf19.3677]

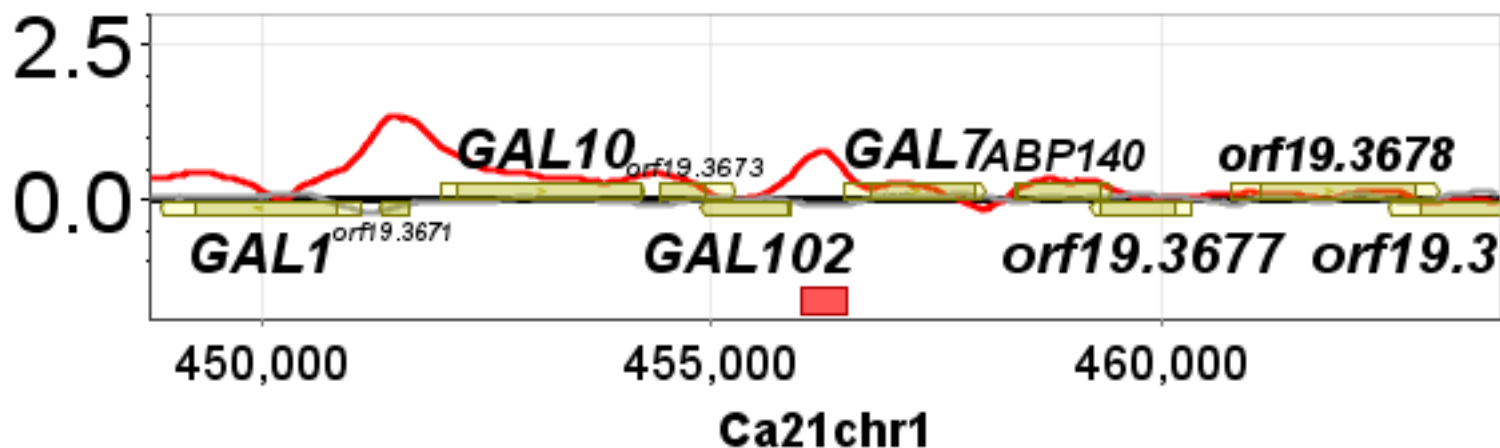

[0.779] Ca21chr3:657843-672842 [+] [DAL5, orf19.310, DAL4, ntar\_577, orf19.308]

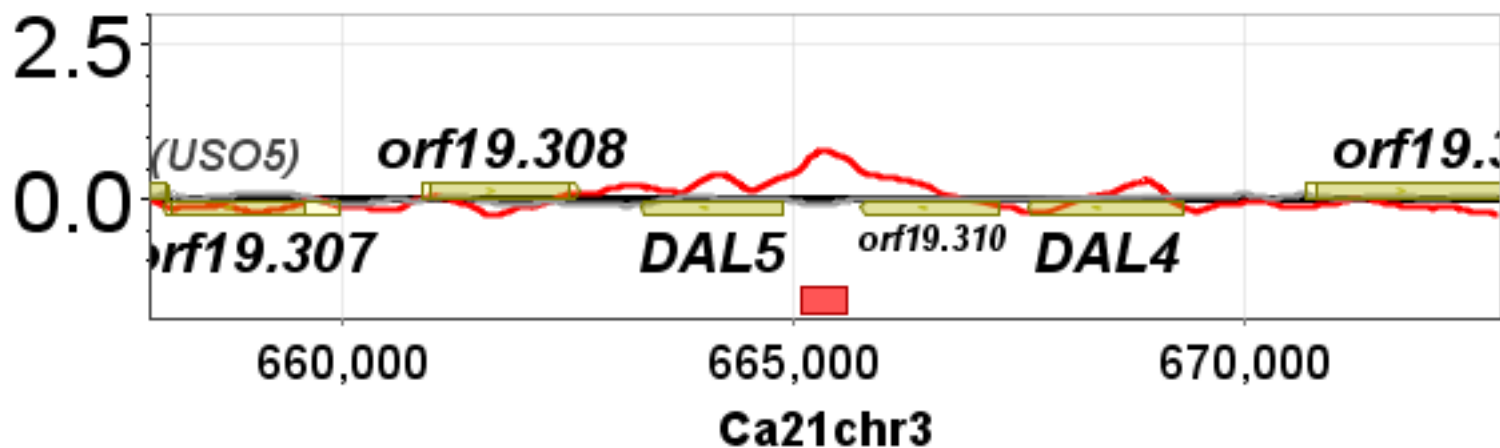

[0.779] Ca21chrR:590699-605698 [+] [RFG1, ntar\_1219]

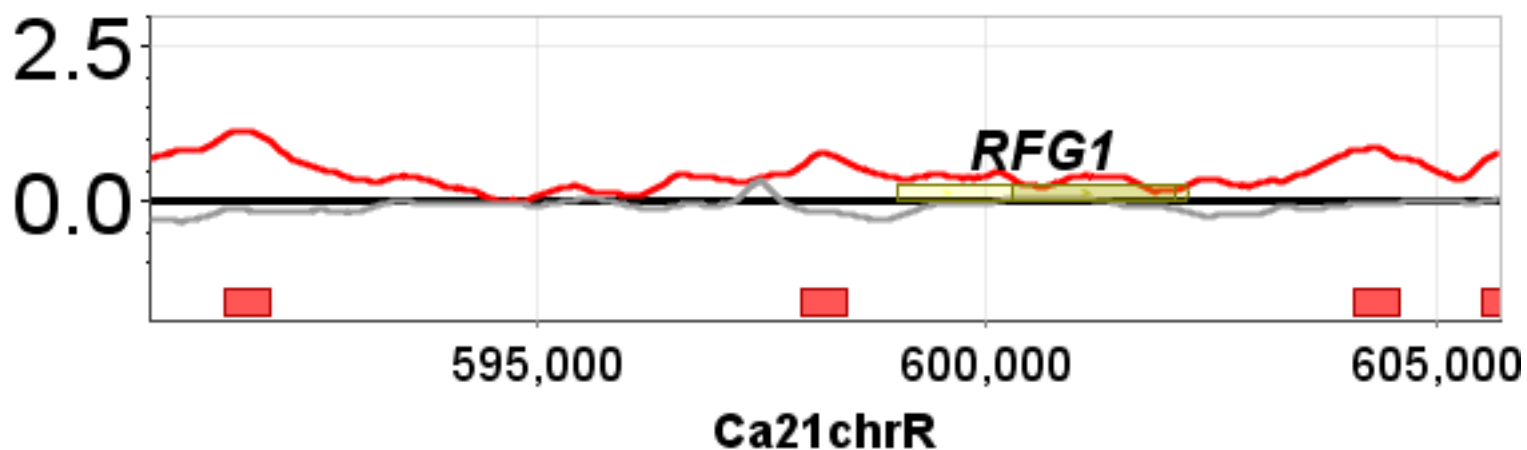

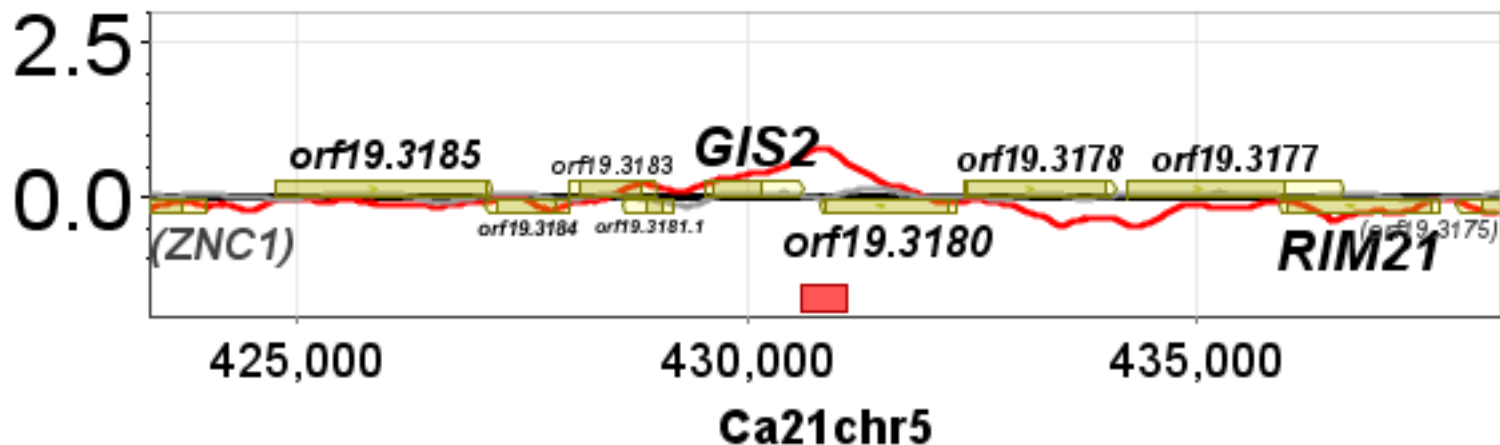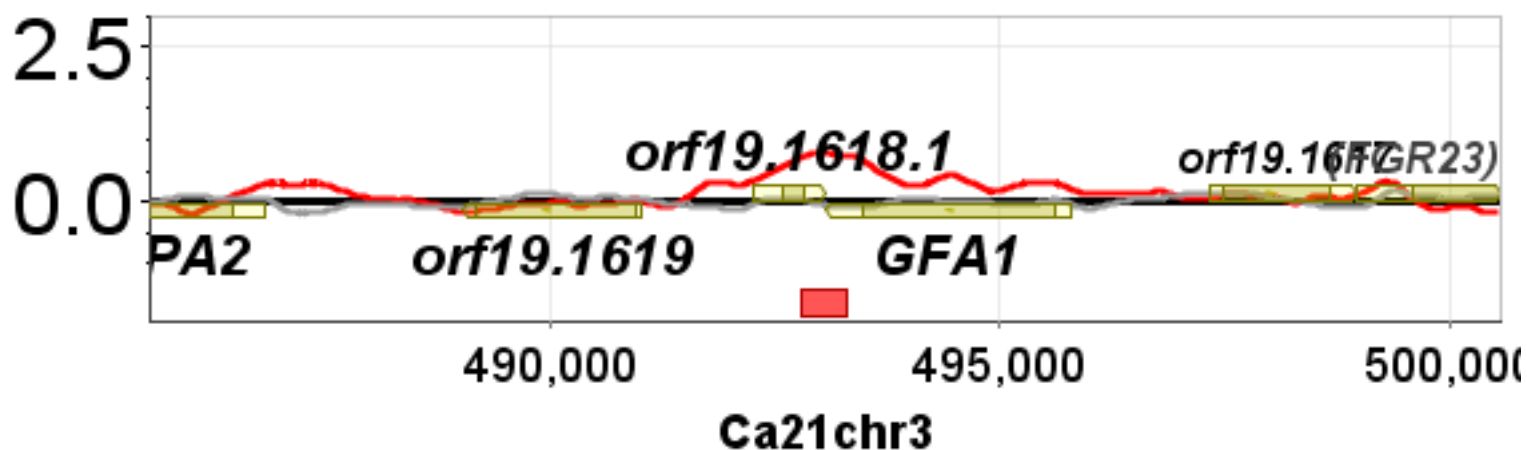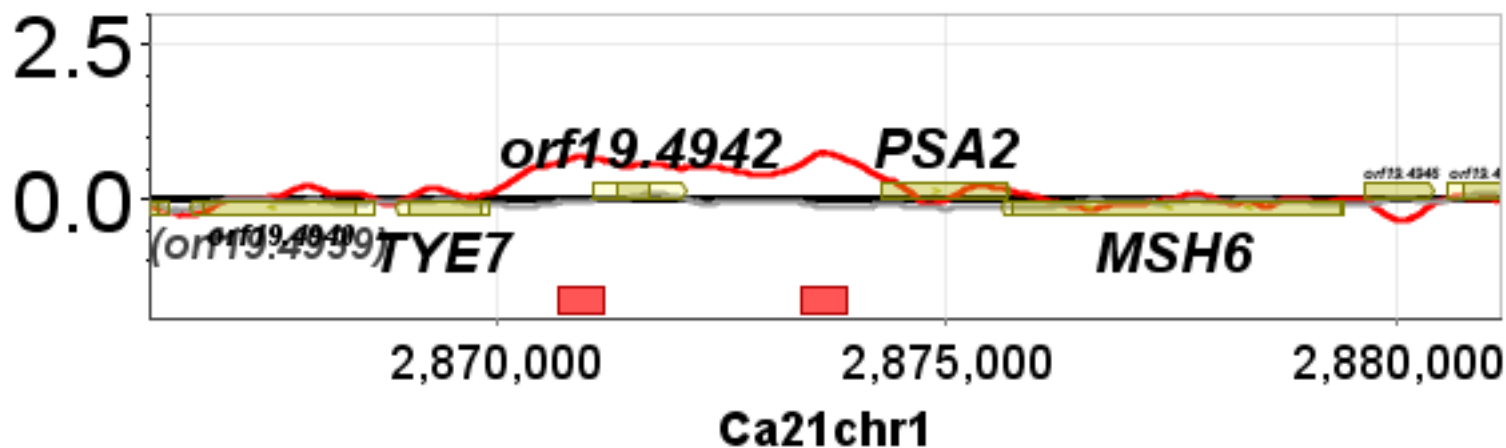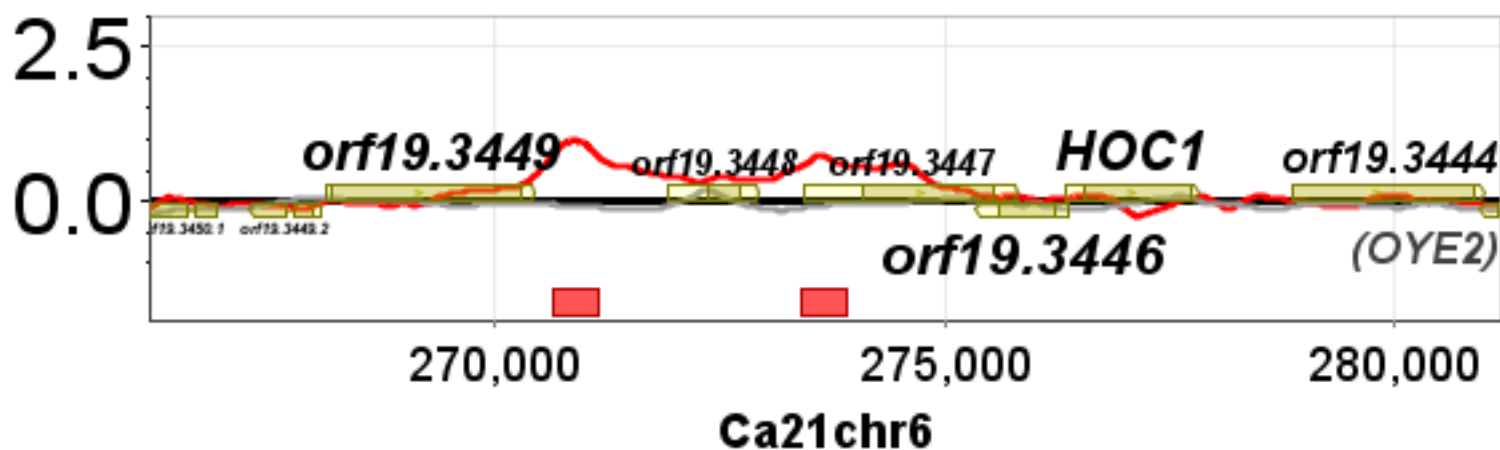

[0.75] Ca21chrR:863572-878571 [+] [IFF9, orf19.4358, orf19.4357, orf19.467]

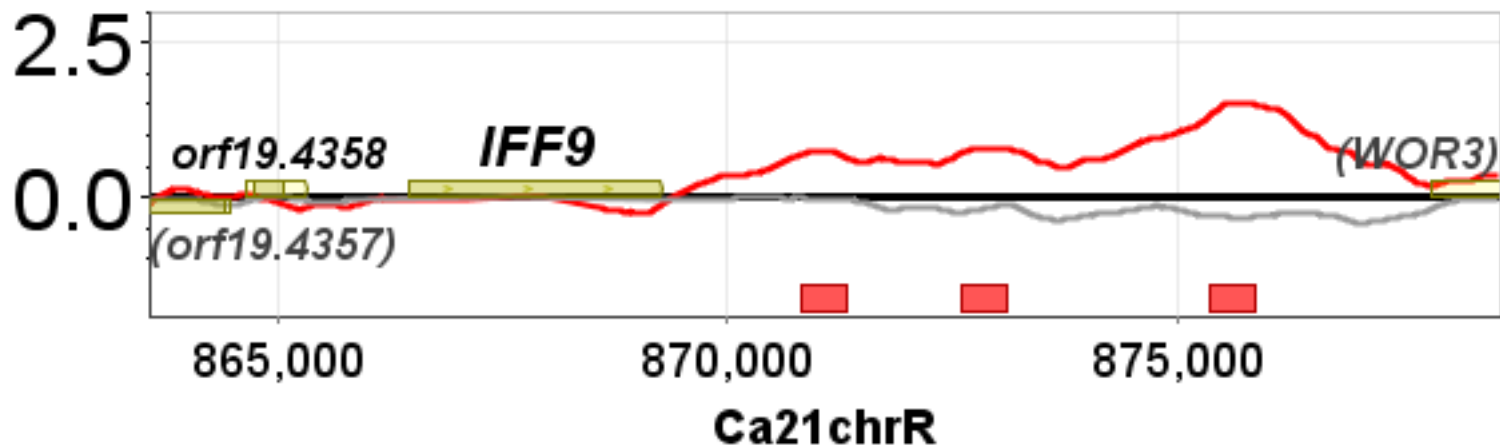

[0.747] Ca21chrR:2077006-2092005 [+] [ntar\_1396.5, ntar\_1397.1, ntar\_1396, ntar\_1398, ntar\_1395]

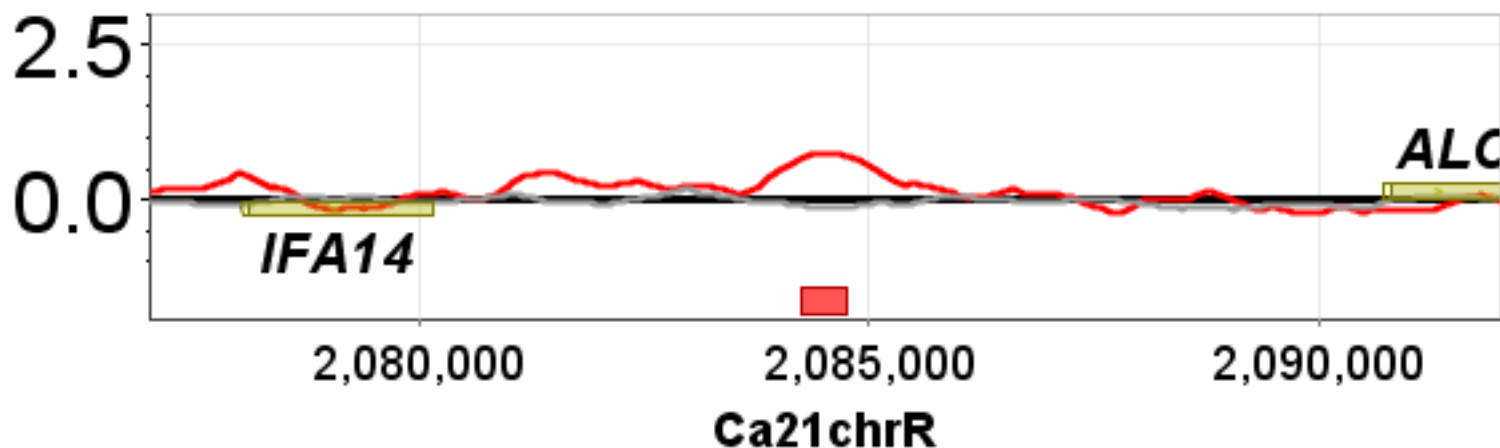

[0.743] Ca21chr3:332860-347859 [+] [TOS1, orf19.1687, orf19.1691, orf19.1686, ntar\_553]

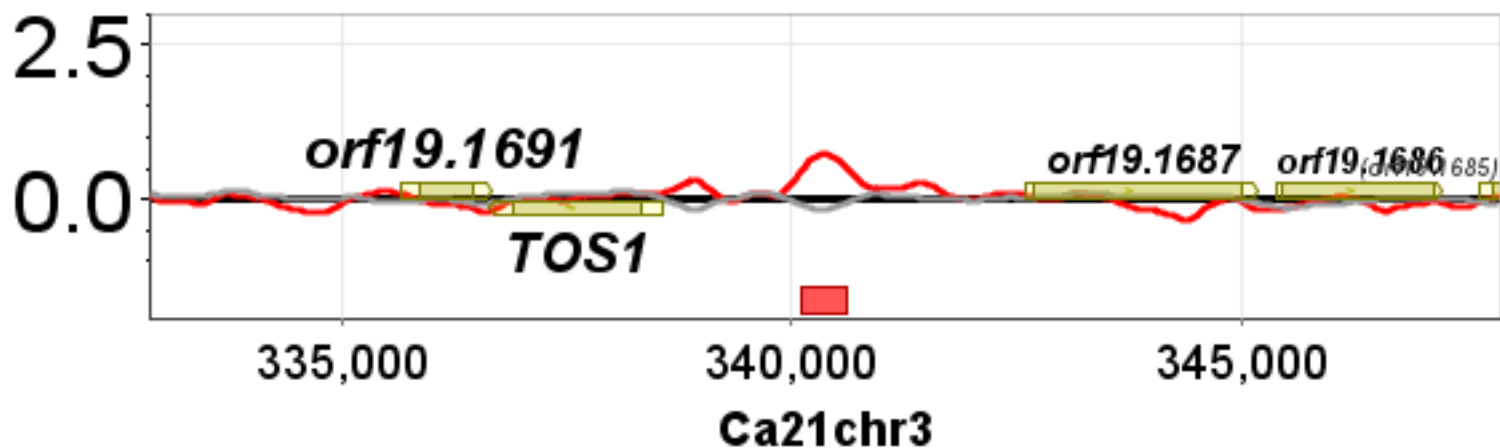

[0.742] Ca21chr2:737502-752501 [+] [orf19.867, ADAEC, RAD32, ntar\_354, orf19.864]

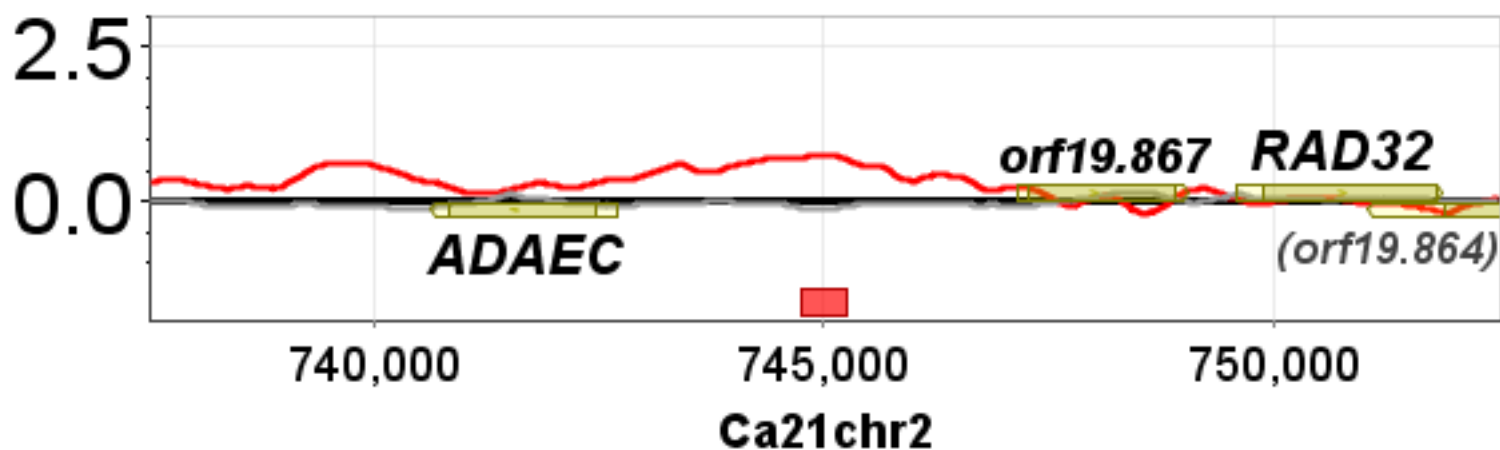

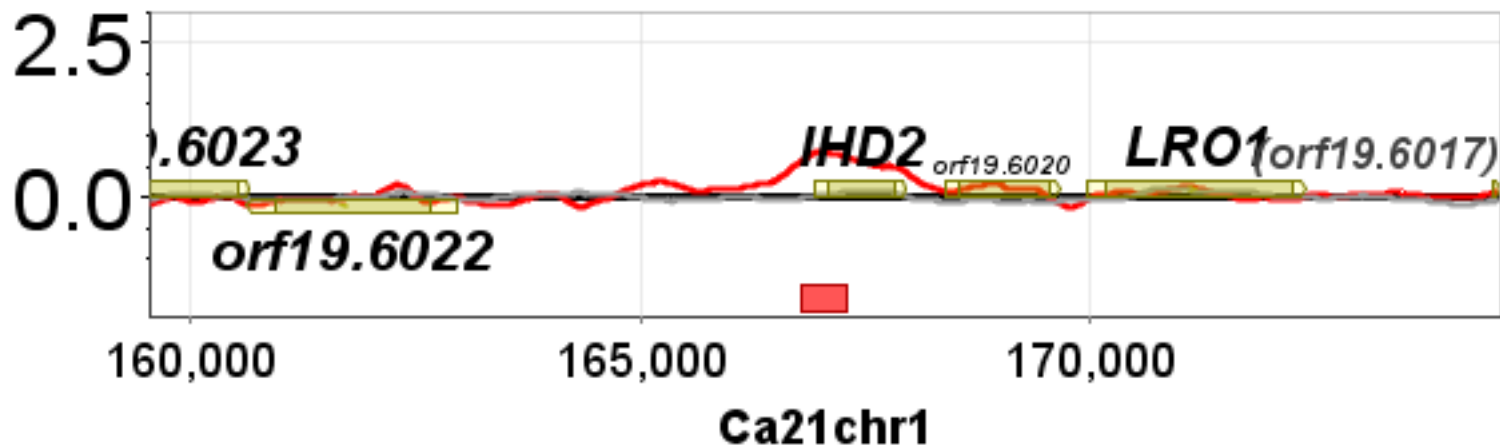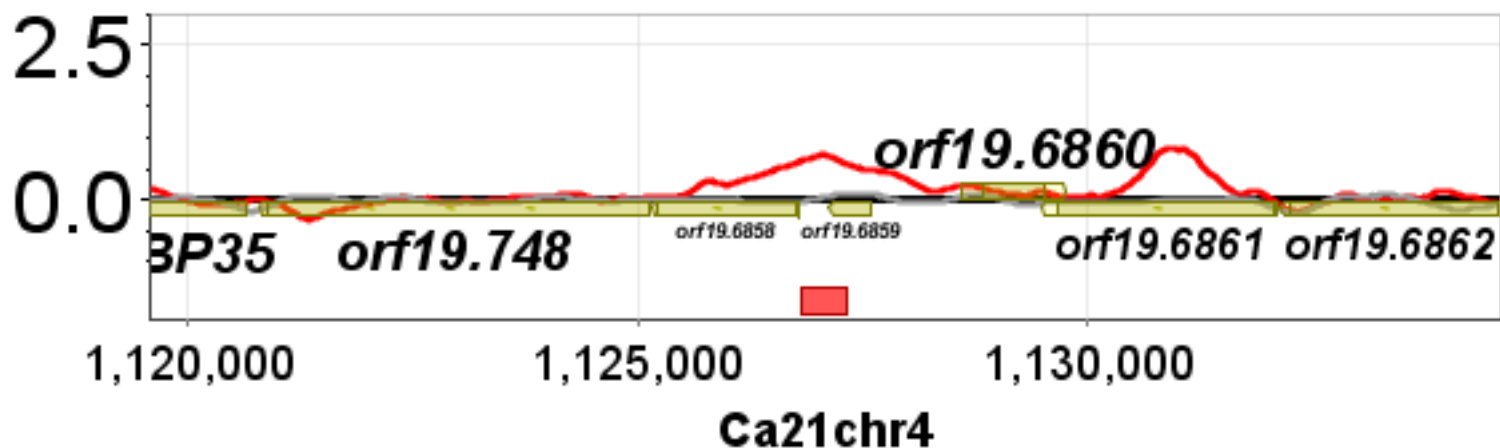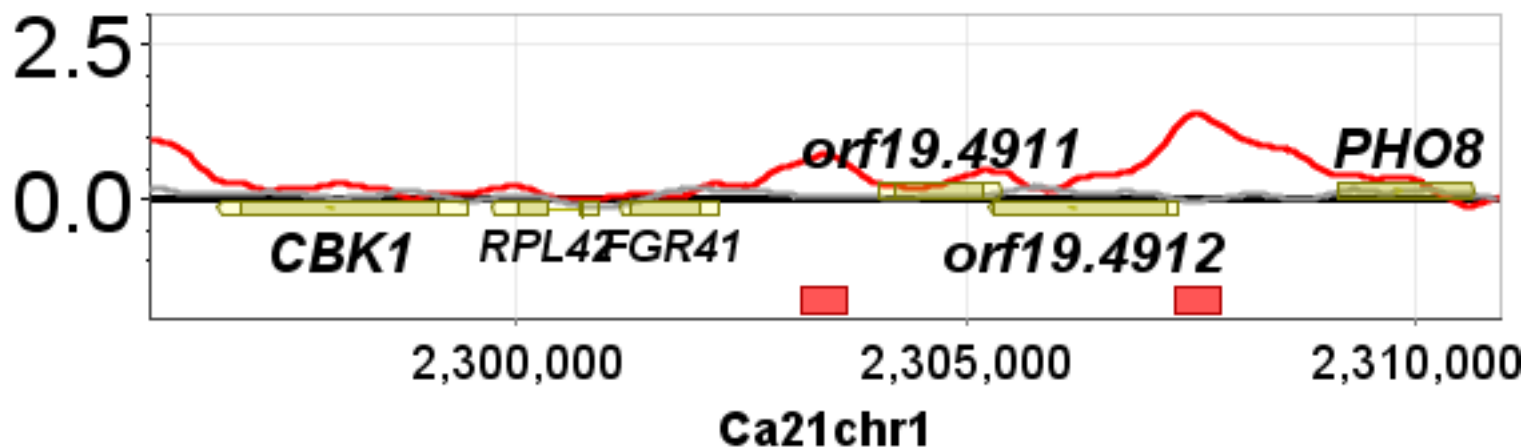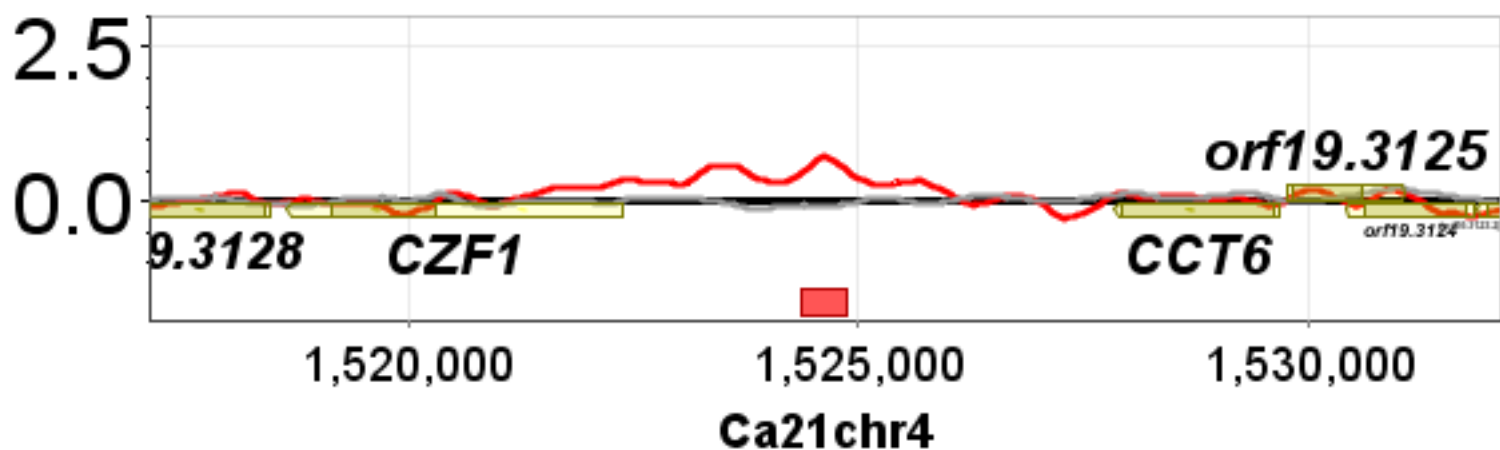



[0.707] Ca21chr5:586046-601045 [+] [orf19.4280, MNN1, orf19.4281, orf19.4278, orf19.4282]

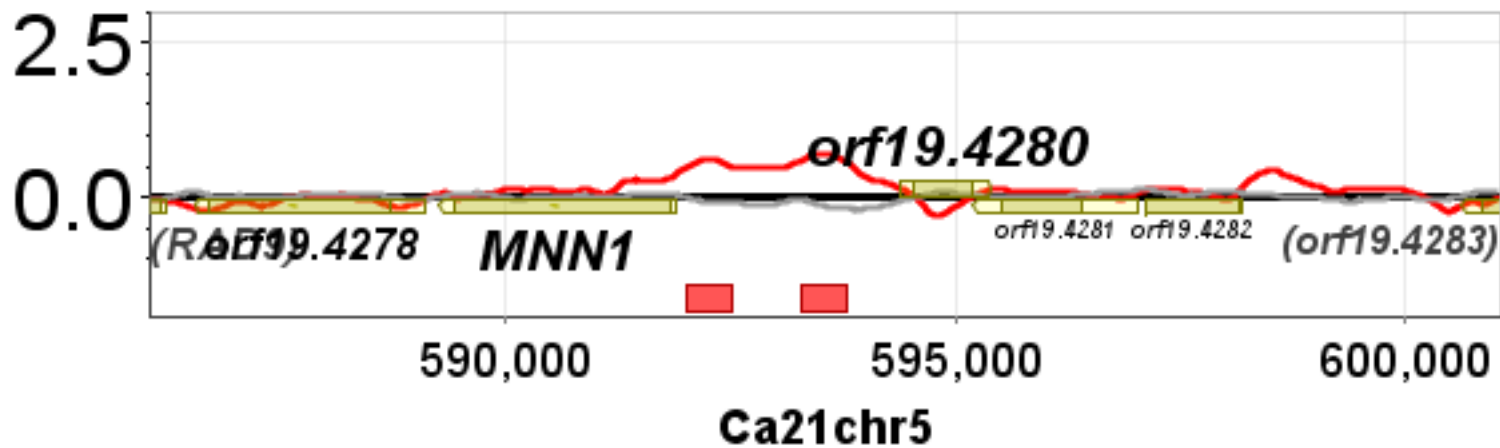

[0.703] Ca21chr5:777147-792146 [+] [orf19.6658, GAP6, DUR3, ntar\_919, orf19.6654]

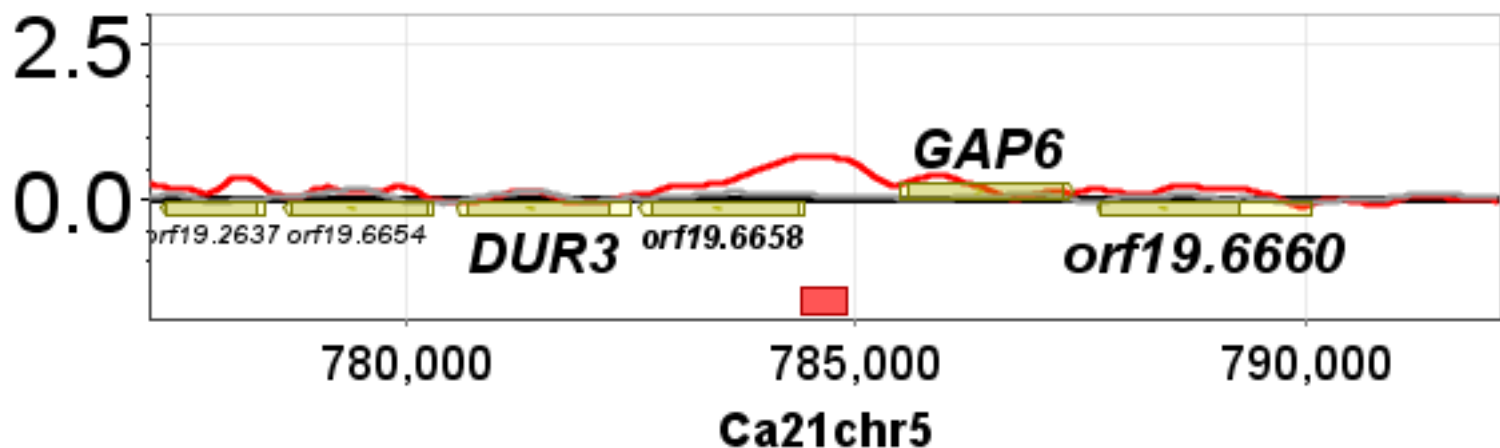

[0.702] Ca21chr2:447086-462085 [+] [orf19.1544, OPI1, orf19.1545, orf19.1546, ntar\_329]

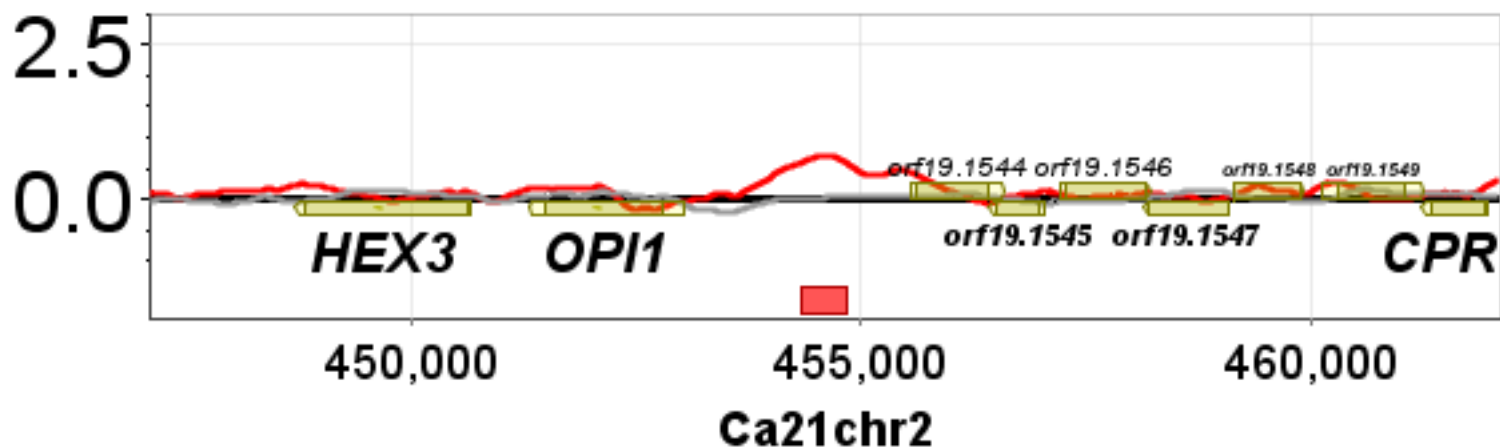

[0.698] Ca21chr5:94580-109579 [+] [orf19.938, orf19.937, orf19.936, ntar\_854, NAM7]

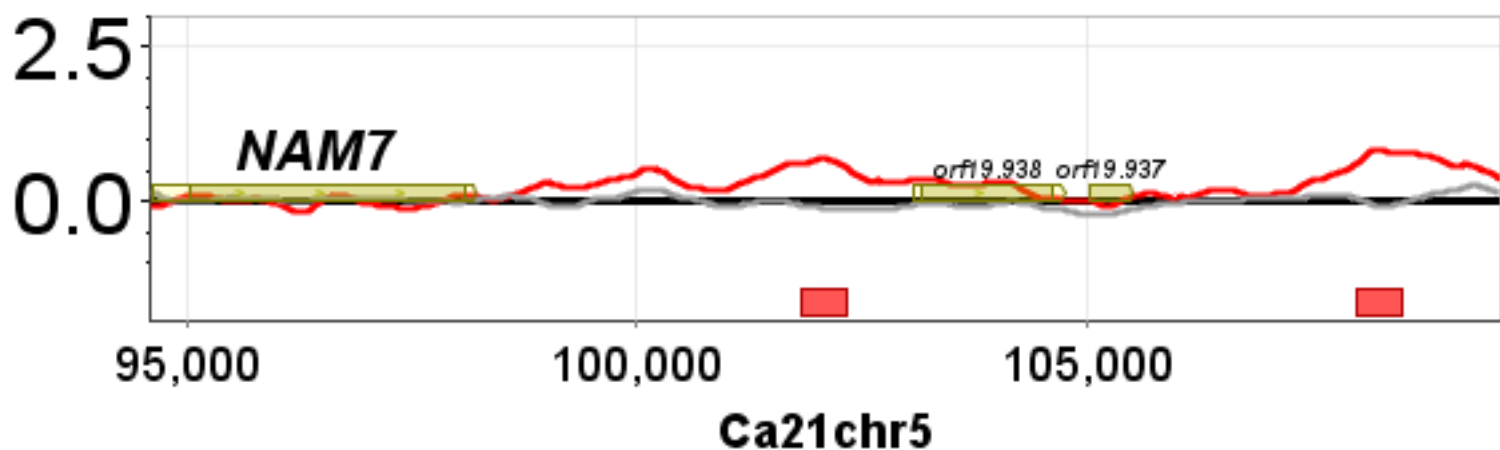

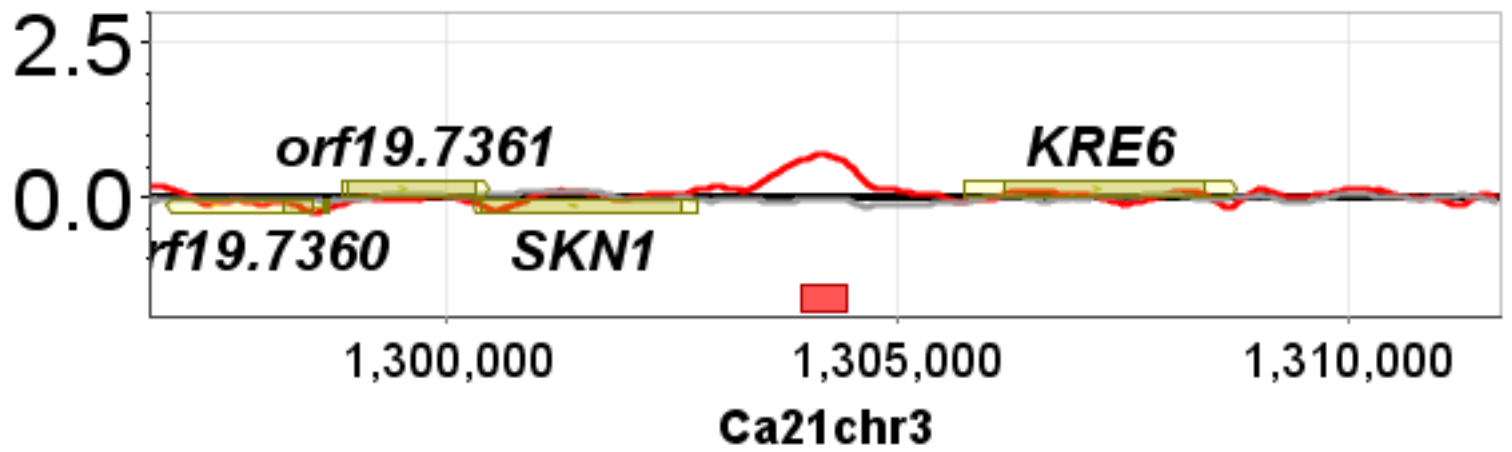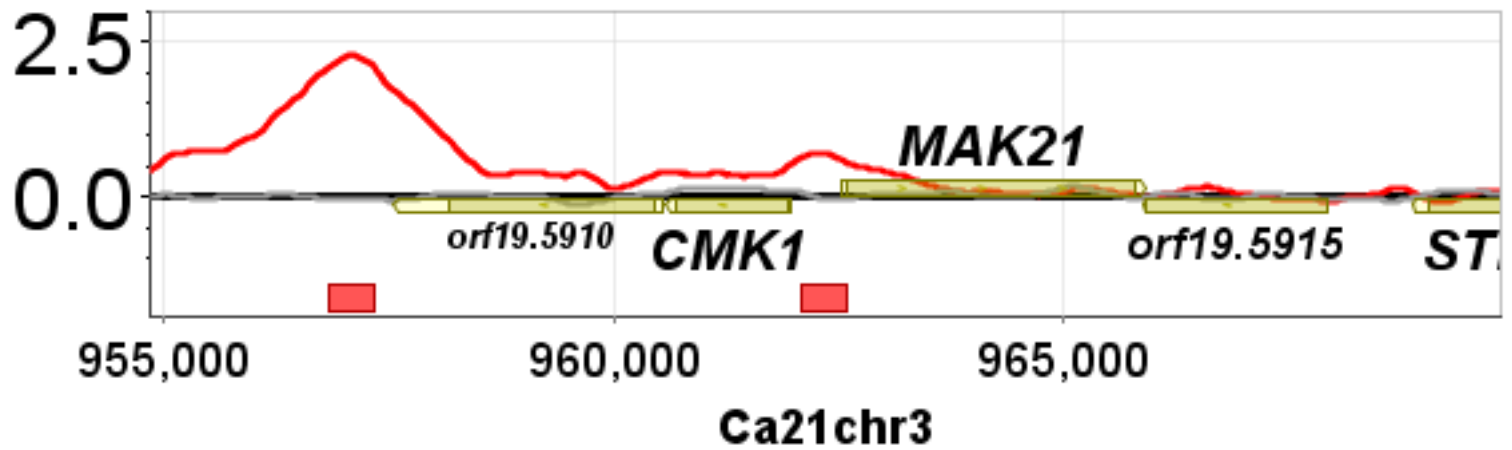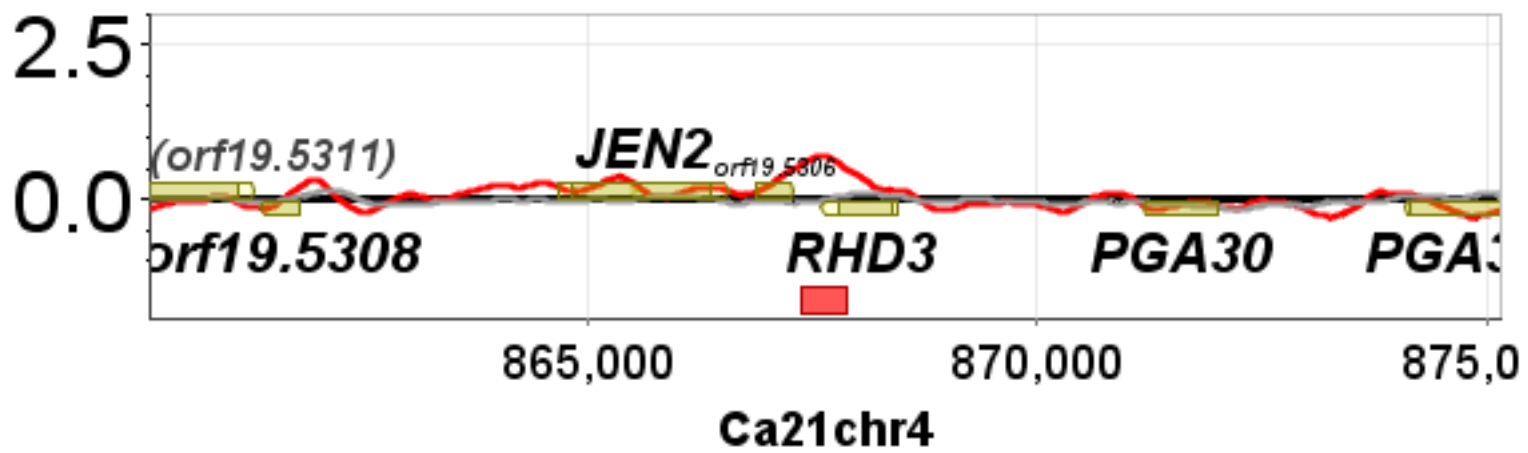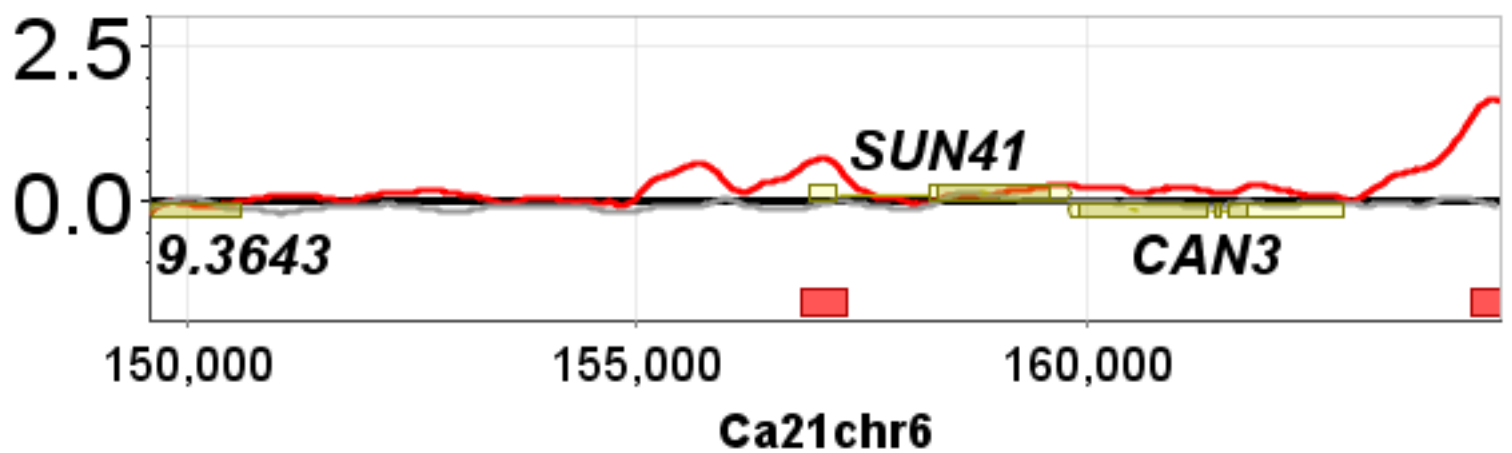

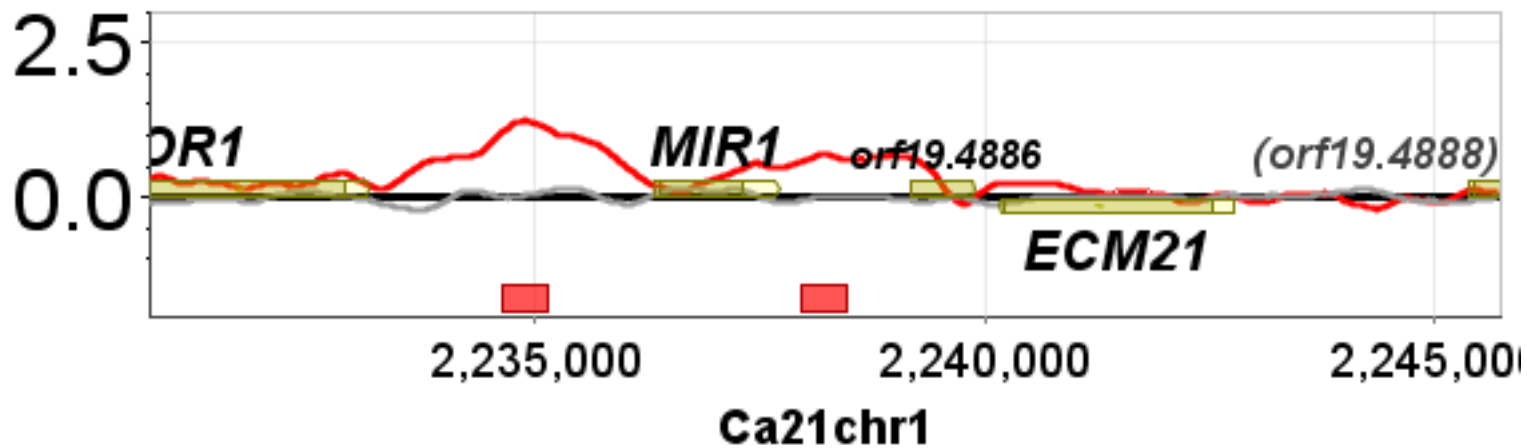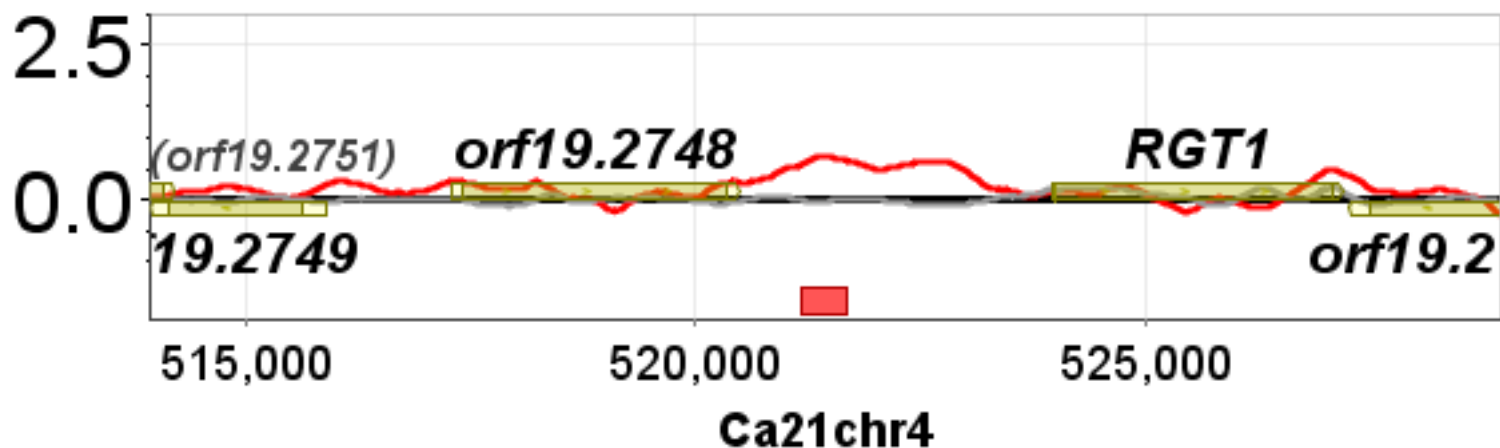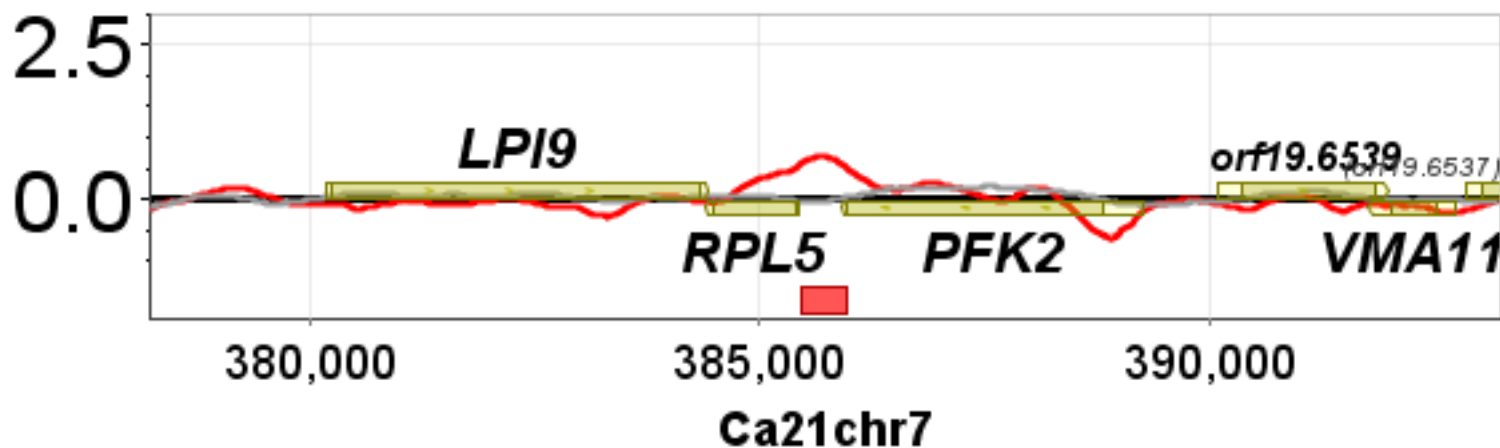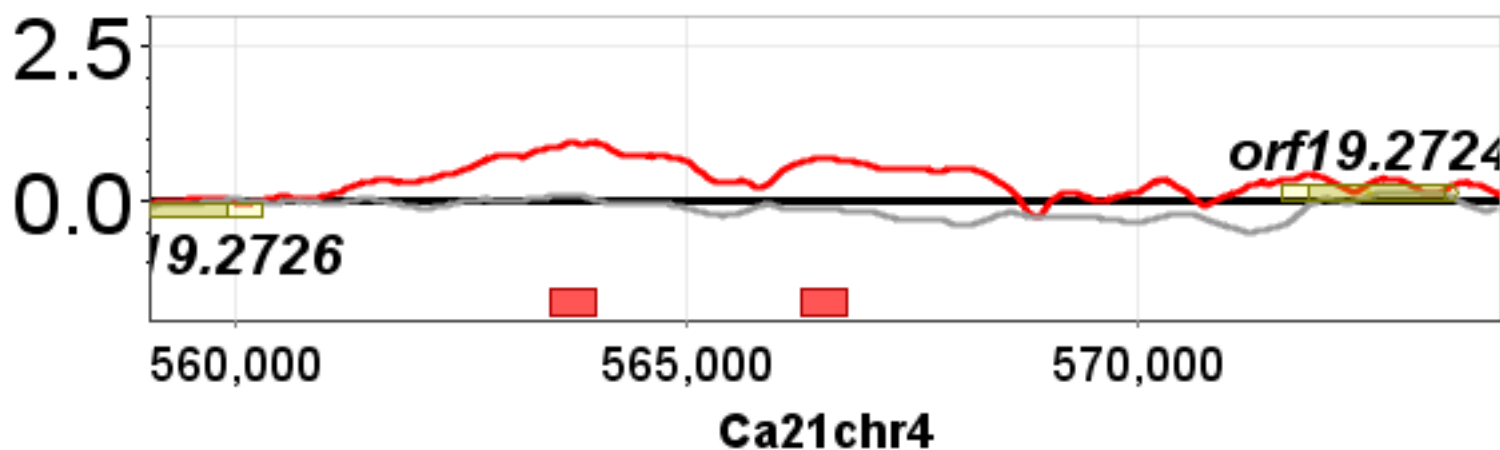

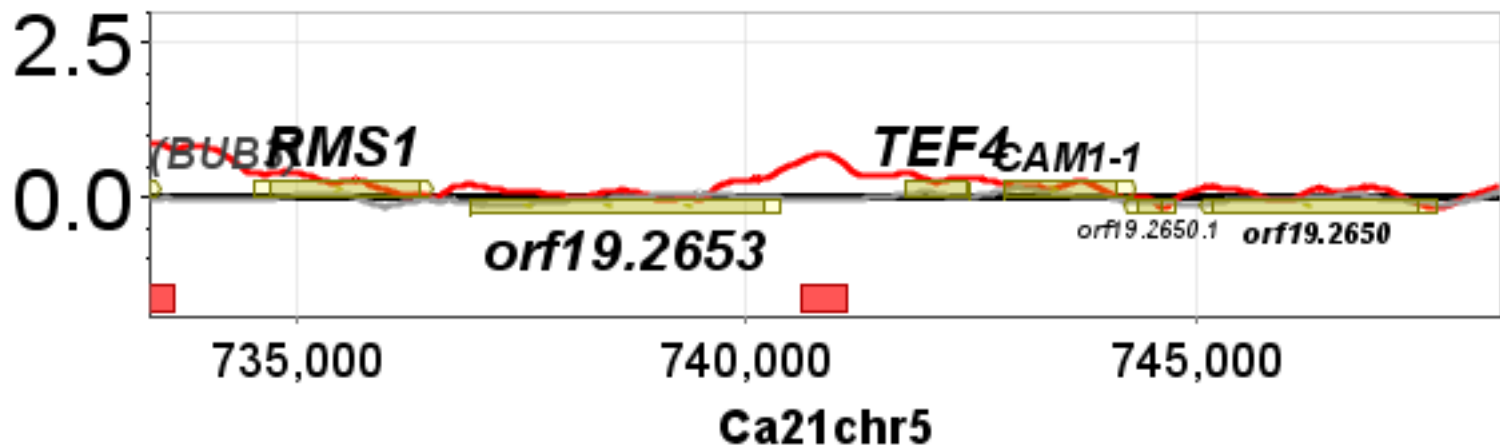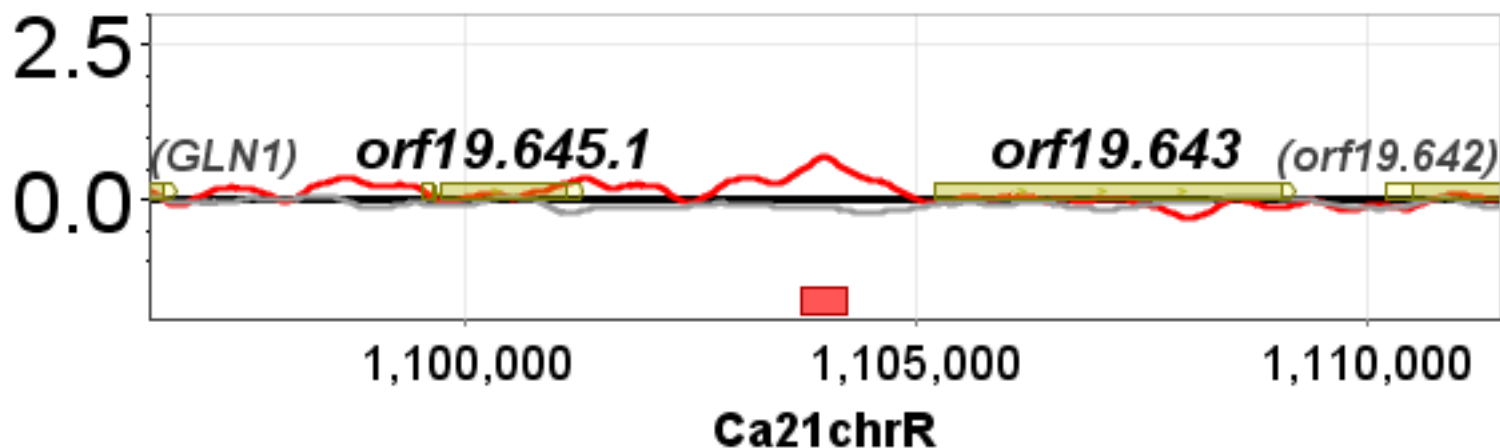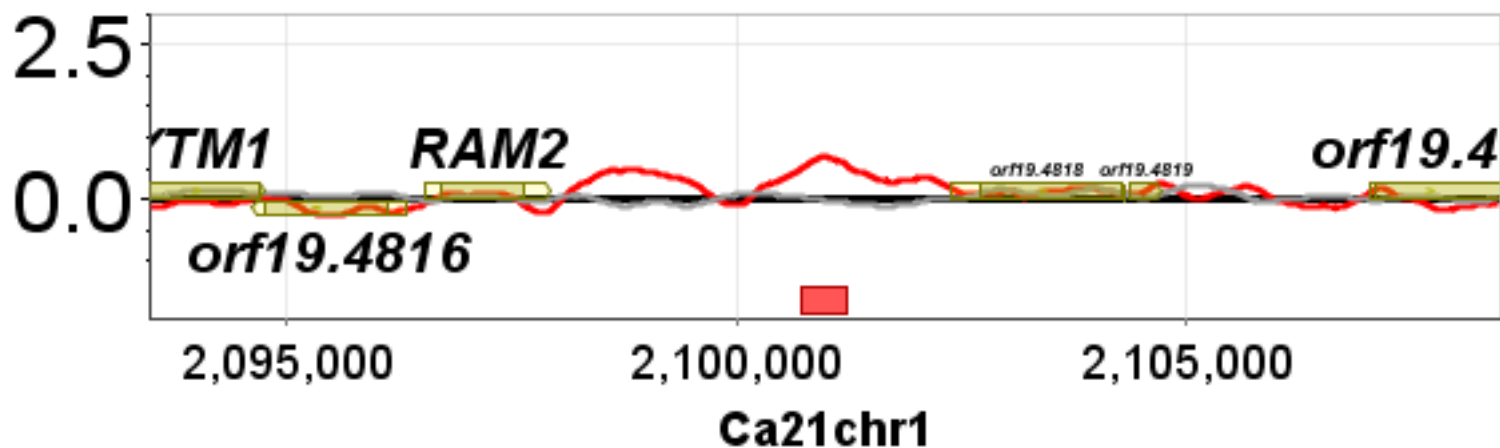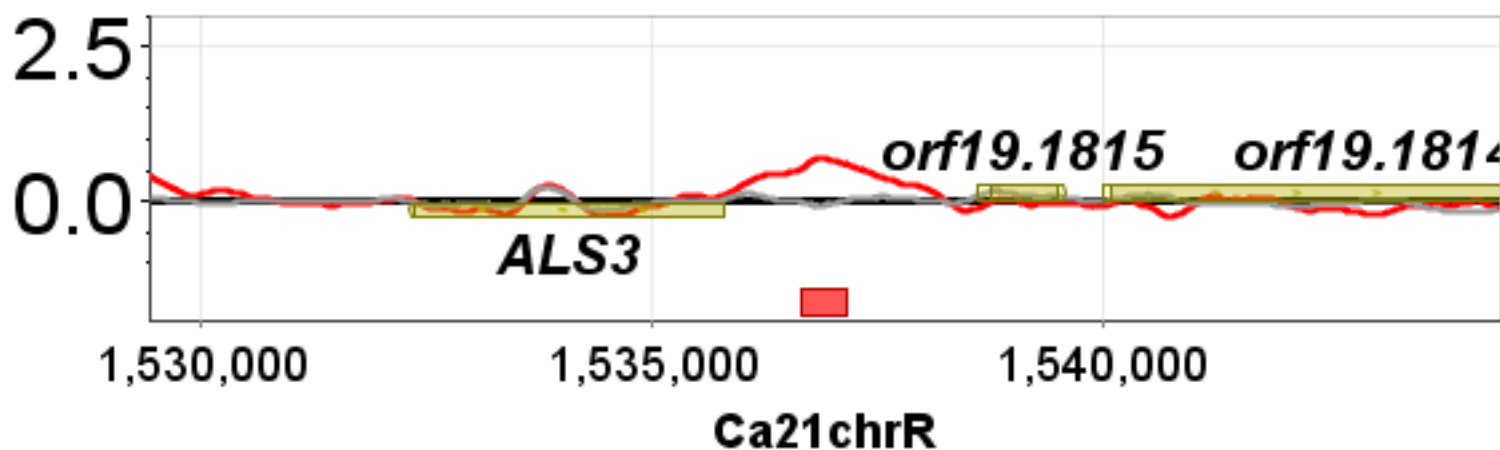

[0.682] Ca21chr1:2863440-2878439 [+] [orf19.4942, TYE7, orf19.4940, PSA2, orf19.4939]

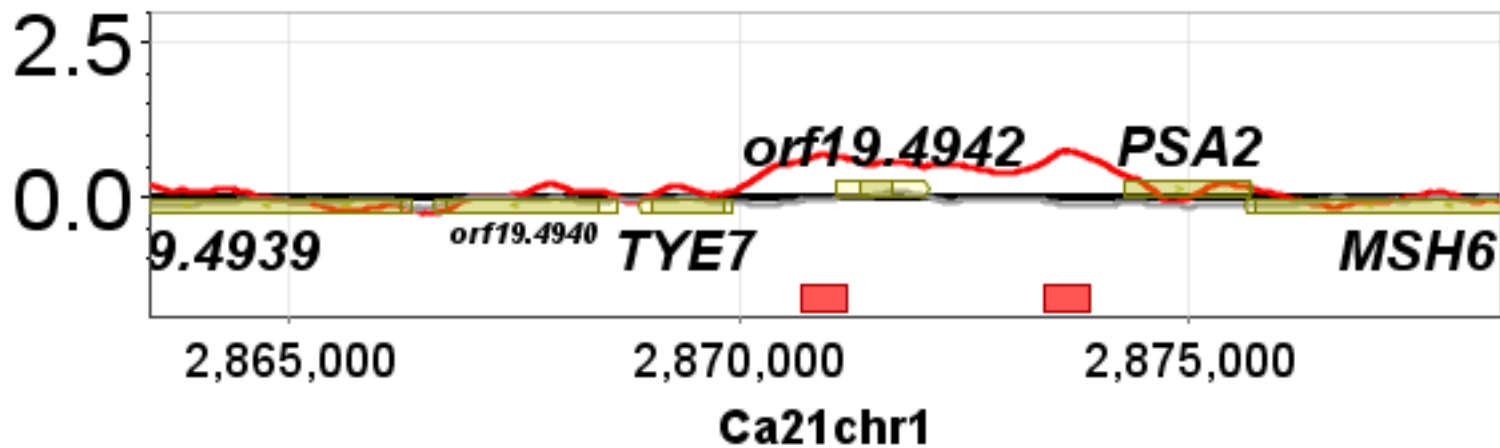

[0.676] Ca21chrR:1563549-1578548 [+] [ARC15, orf19.6152, ntar\_1335, orf19.6148, orf19.730]

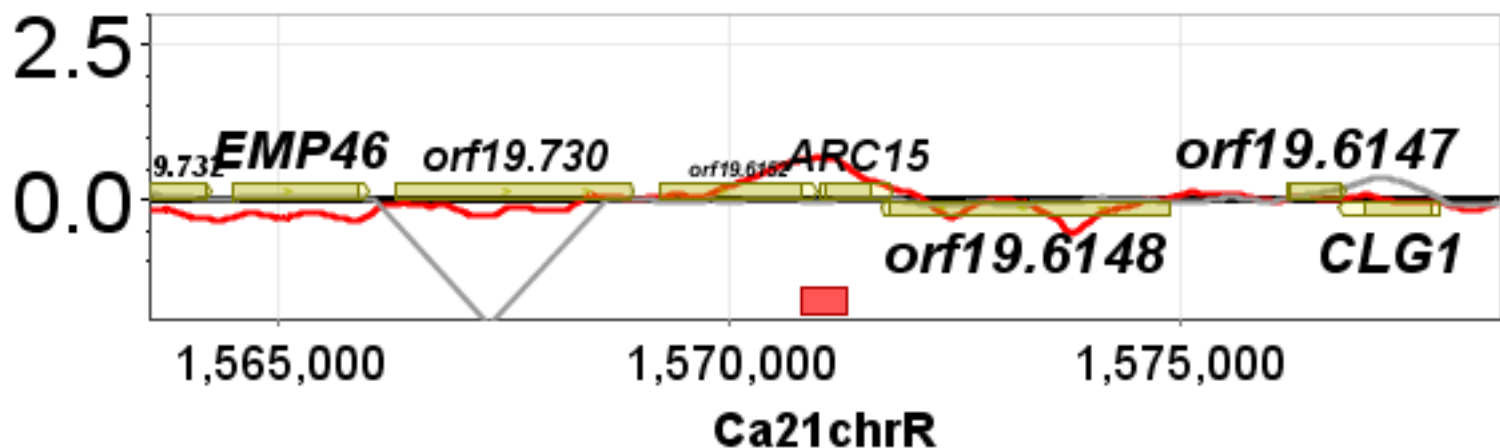

[0.675] Ca21chr6:830710-845709 [+] [ntar\_1033, SNQ2, IHD1, PGA61, ta(ugc)2]

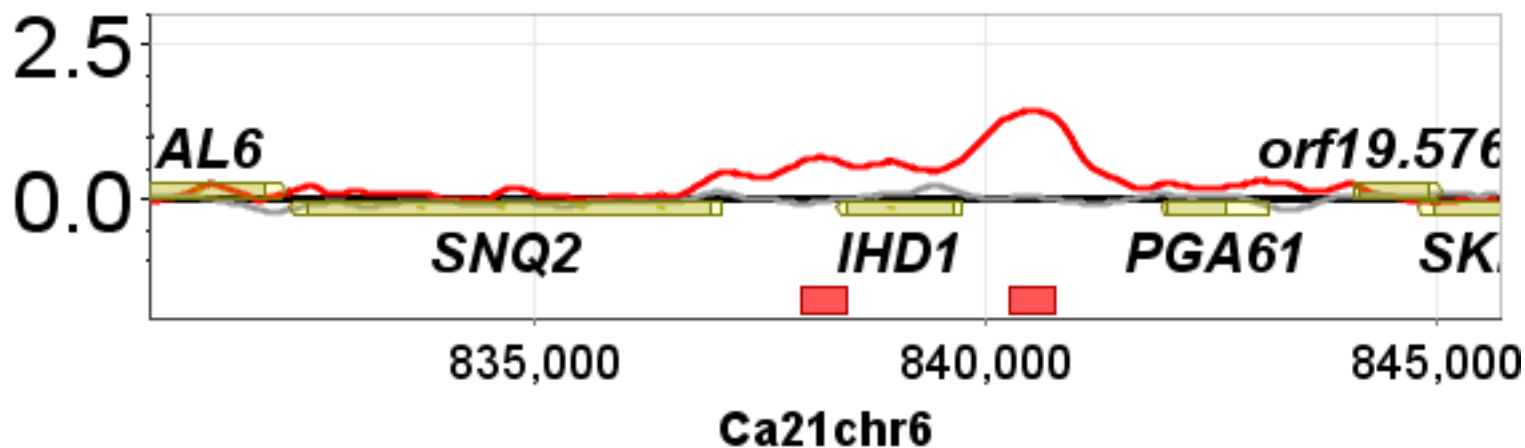

[0.673] Ca21chrR:2051124-2066123 [+] [RTA4, ntar\_1390, PLB3, ntar\_1389, orf19.6596]

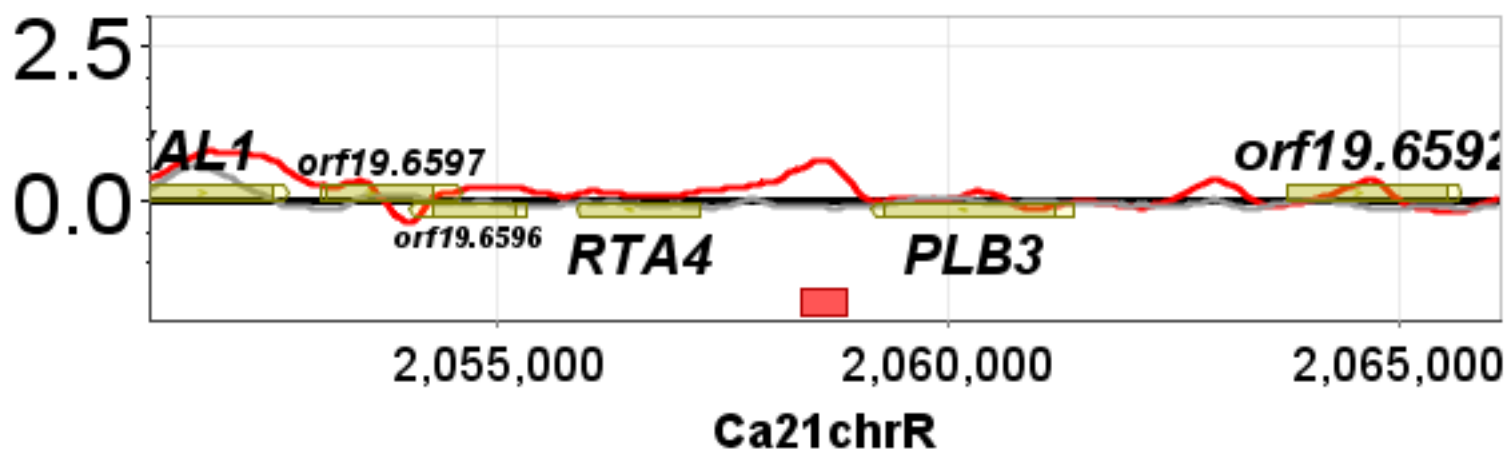

[0.672] Ca21chrR:1156024-1171023 [+] [orf19.3517, orf19.3516, ntar\_1288, orf19.3515, orf19.3518]

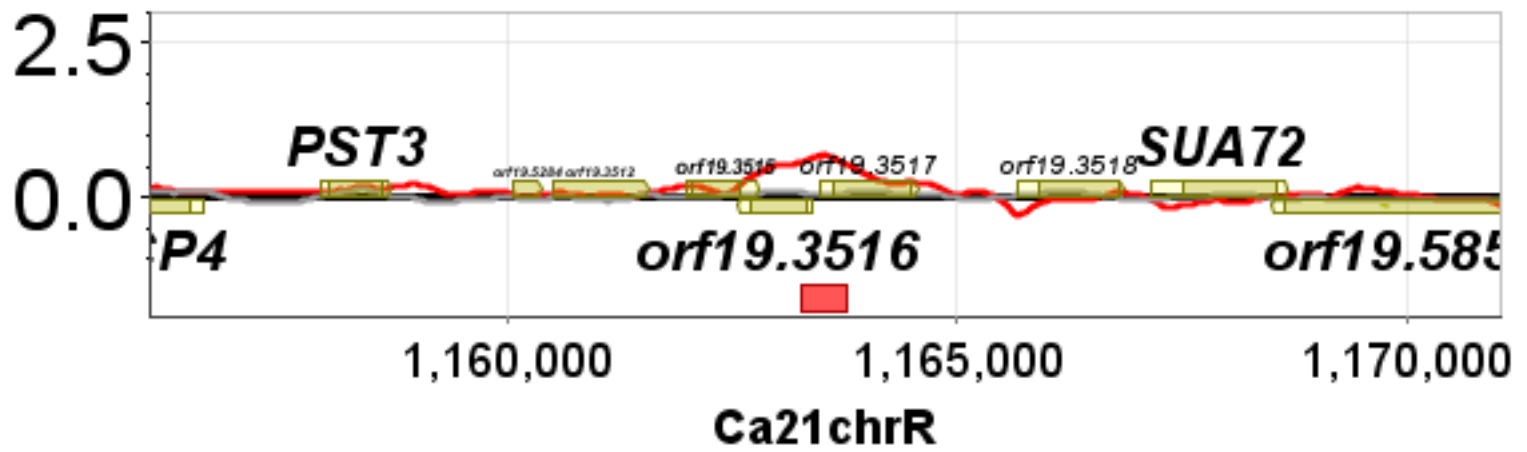

[0.662] Ca21chr1:215629-230628 [+] [ZPR1, orf19.3301, orf19.3302, CCH1]

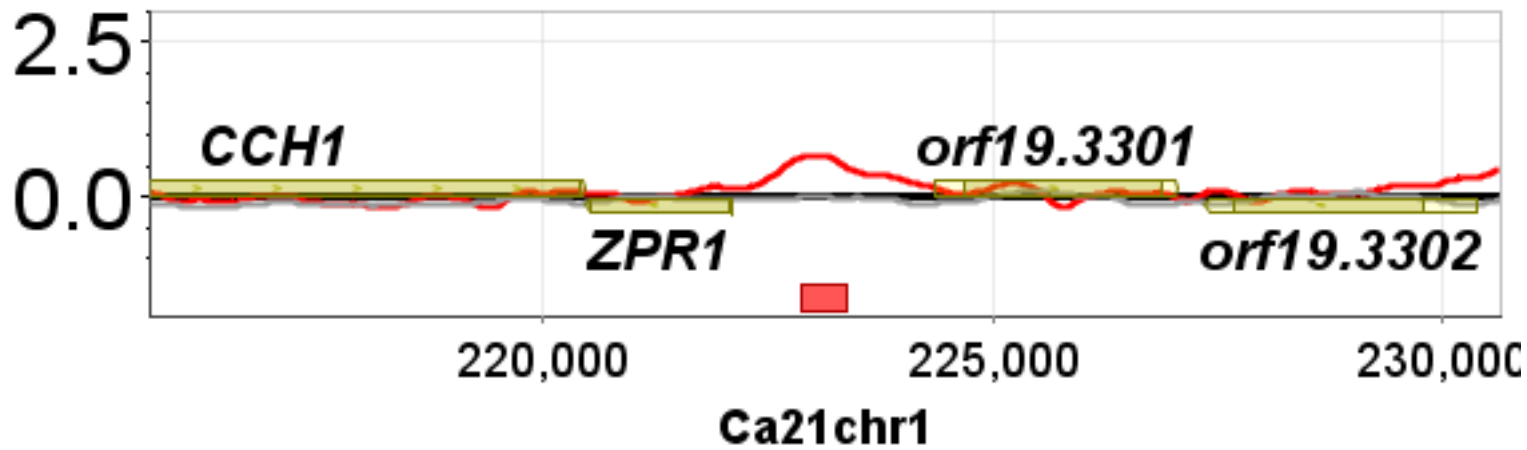

[0.656] Ca21chr5:914814-929813 [+] [CHT2, orf19.3897, orf19.3894, ntar\_941, orf19.3898]

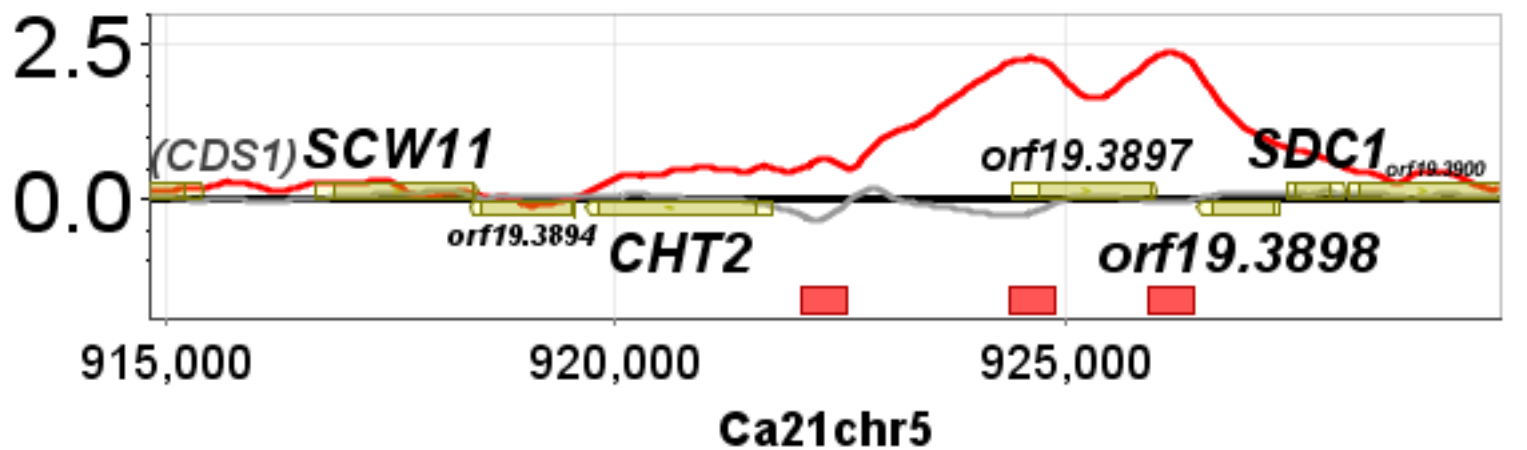

[0.654] Ca21chr2:422078-437077 [+] [ntar\_327, orf19.1535, orf19.1534, orf19.1536, ntar\_326]

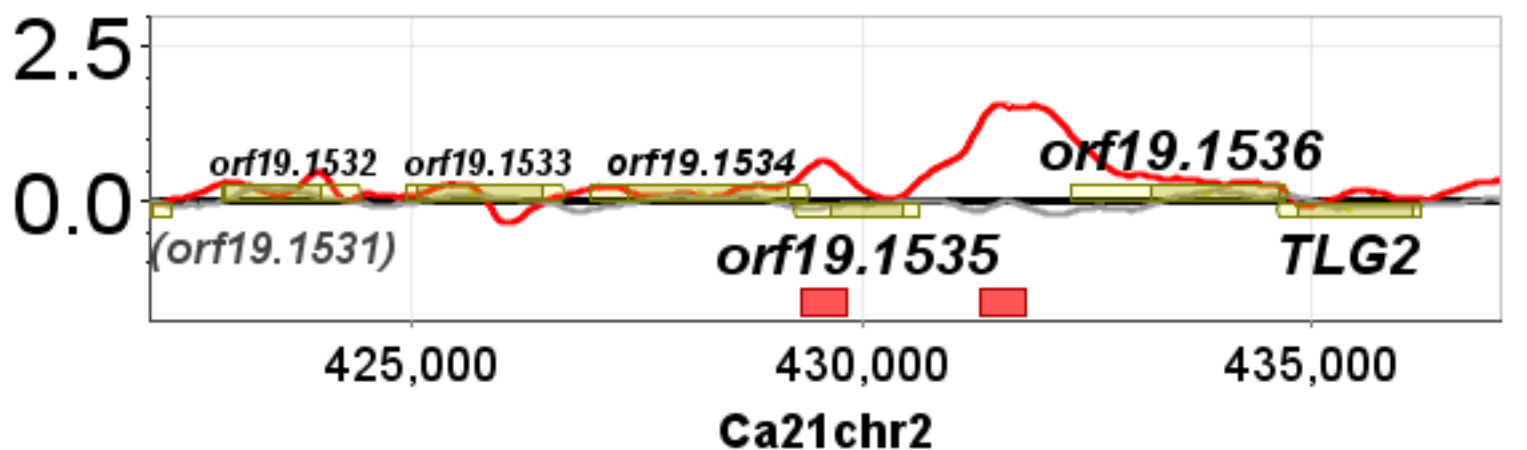

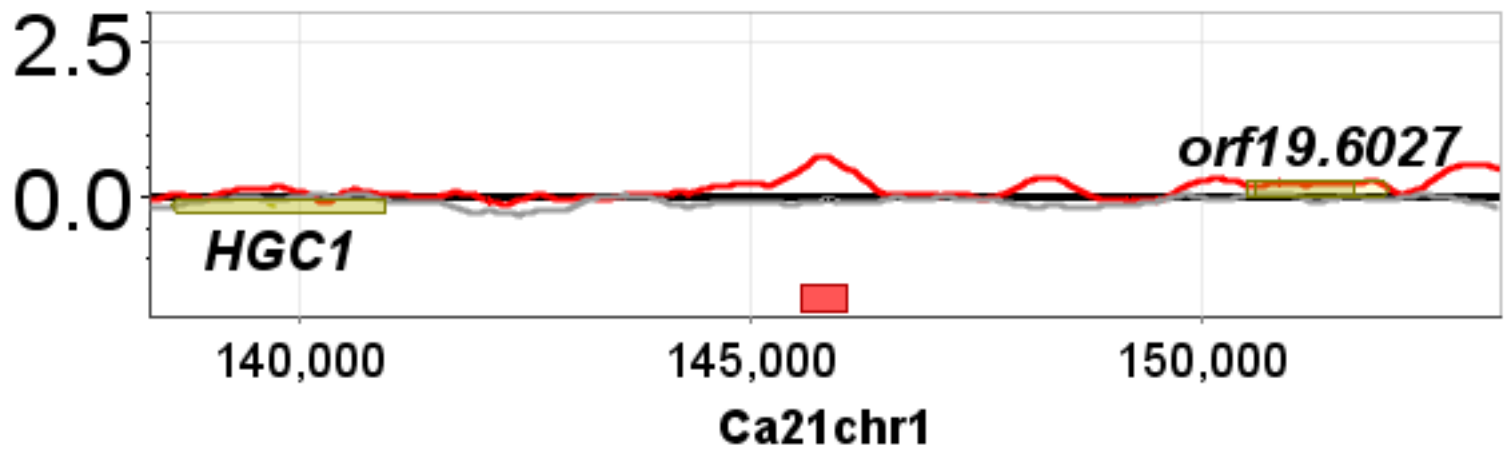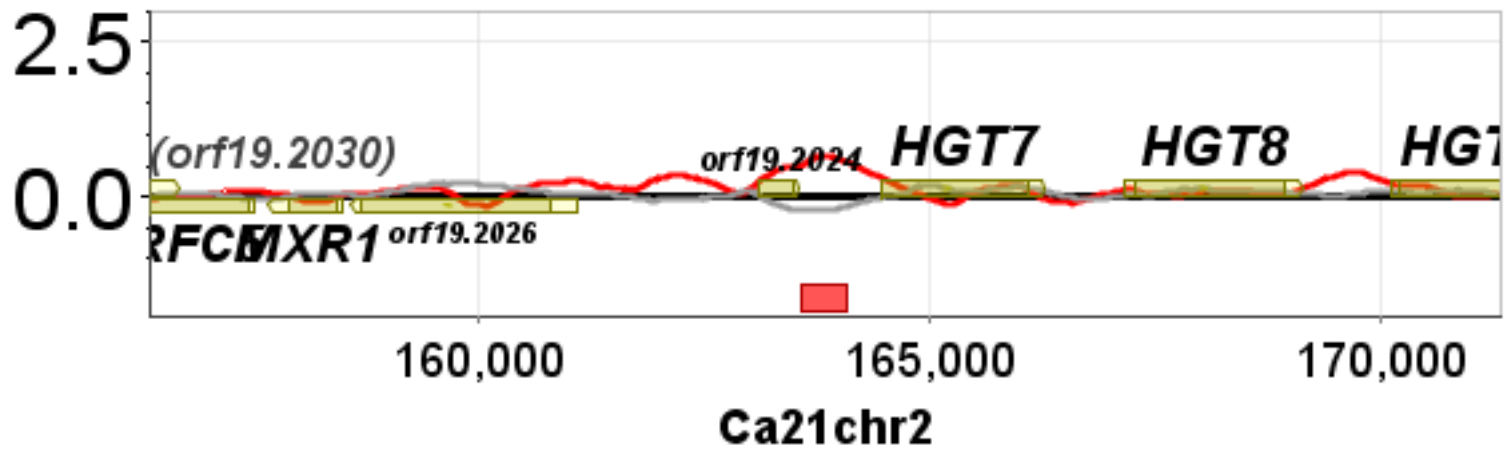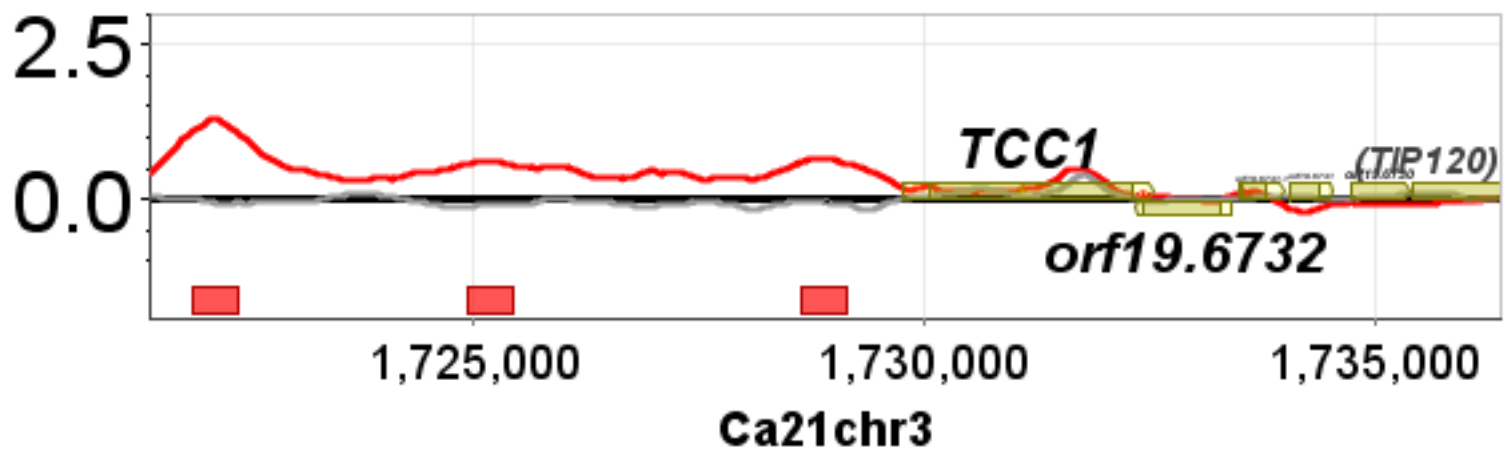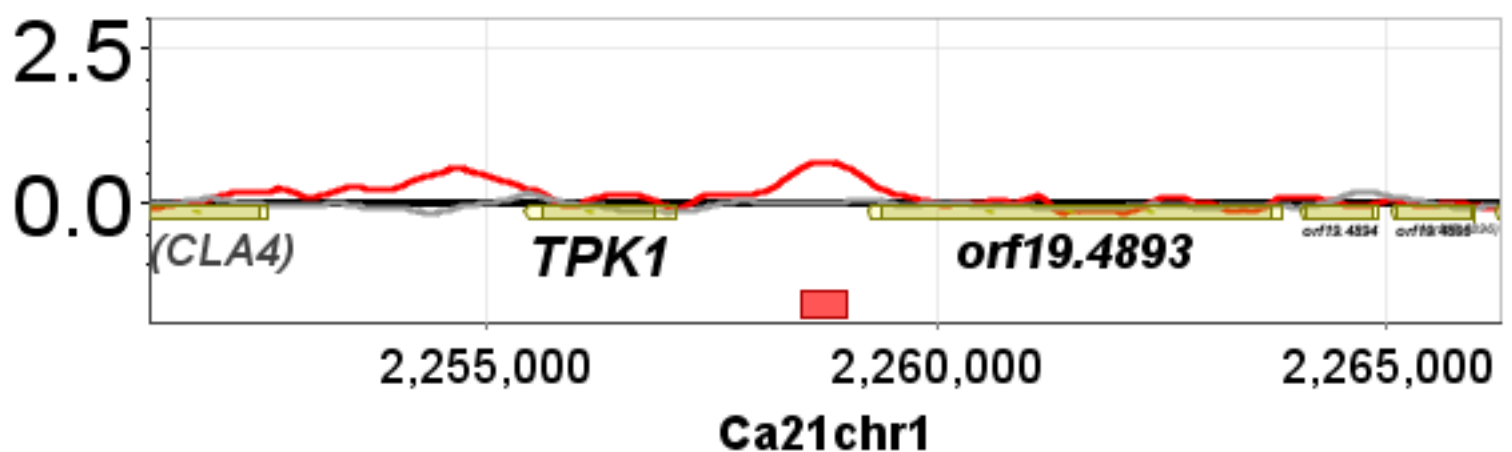

[0.645] Ca21chr1:836649-851648 [+] [orf19.4476, CSH1, KTR4, orf19.4478, orf19.4474]

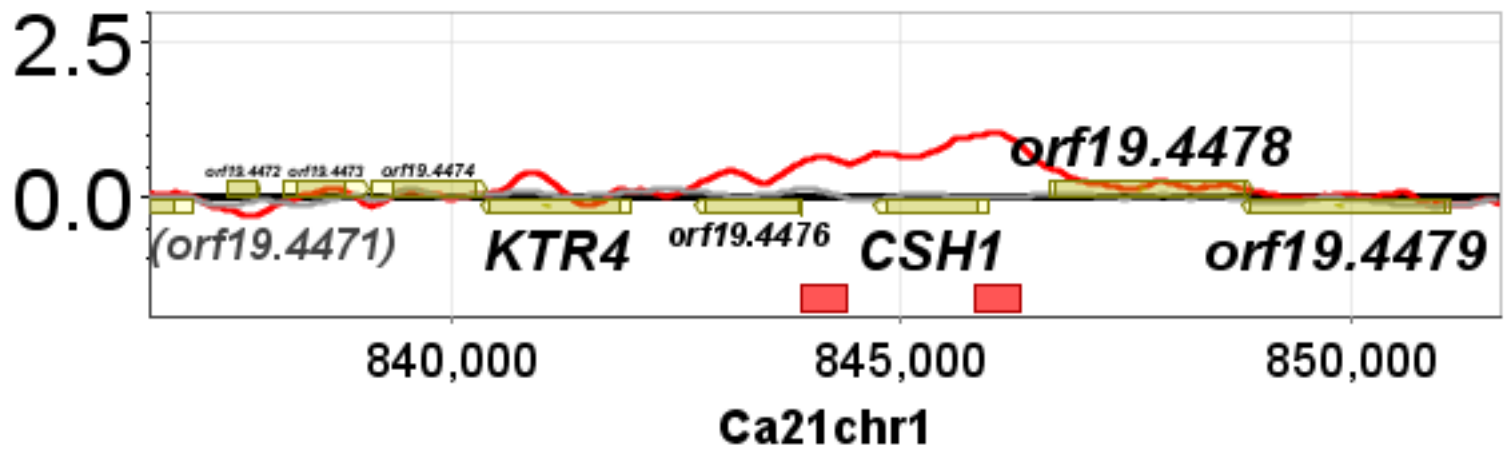

[0.644] Ca21chrR:1259955-1274954 [+] [ntar\_1293, SOK1, ntar\_1292]

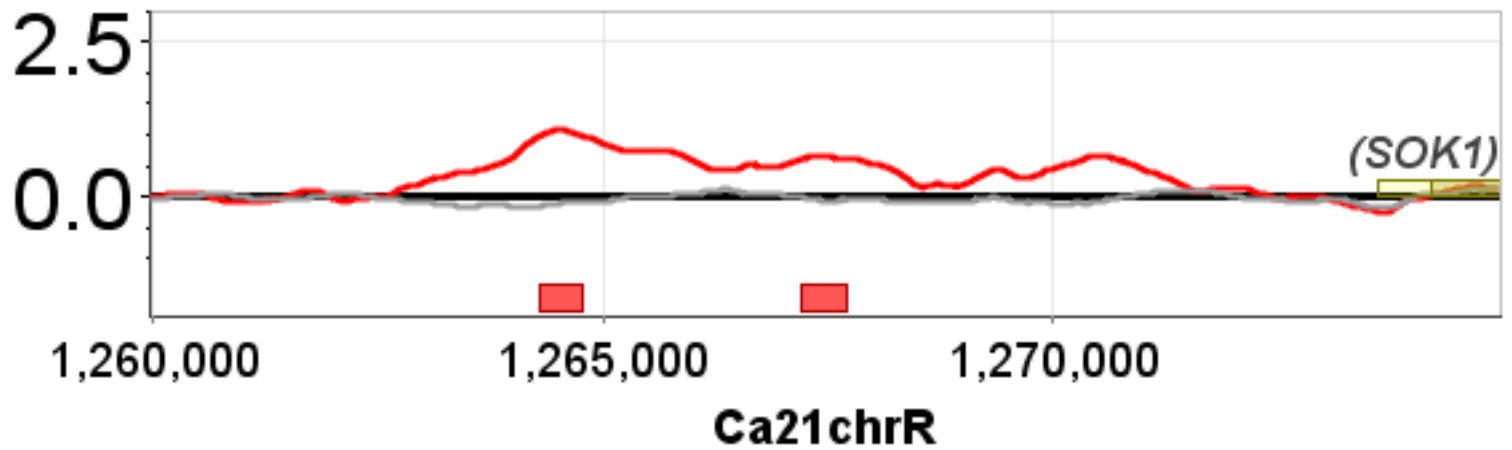

[0.642] Ca21chr1:1080718-1095717 [+] [ntar\_104, orf19.450, GAT2, orf19.449, orf19.448]

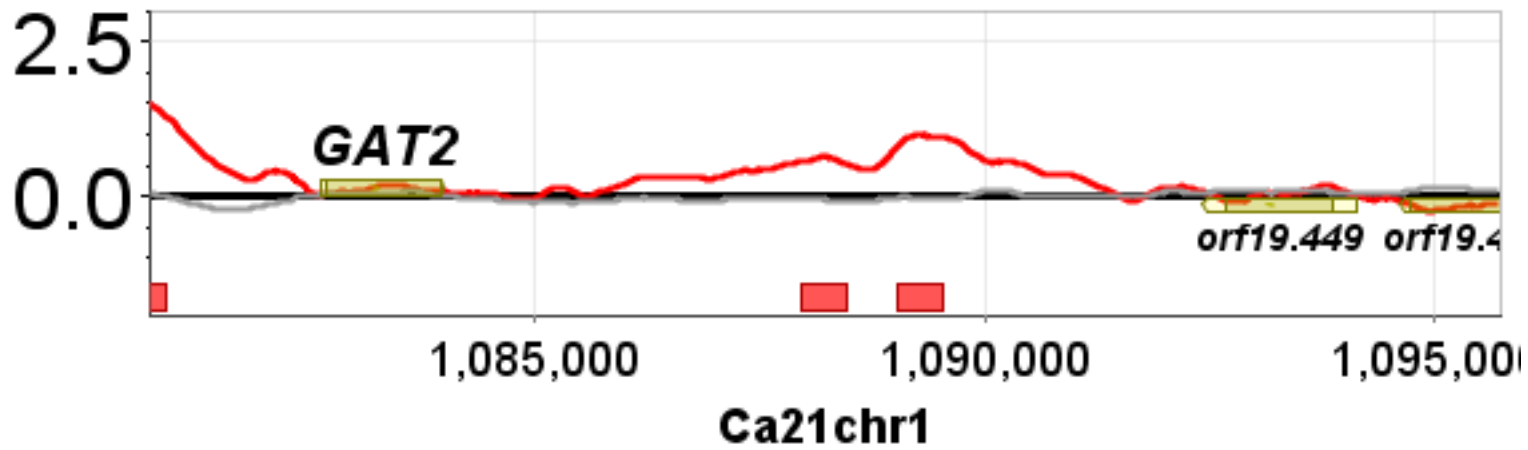

[0.641] Ca21chrR:603801-618800 [+] [ntar\_1221, ntar\_1222, orf19.2825, ntar\_1223, ntar\_1224]

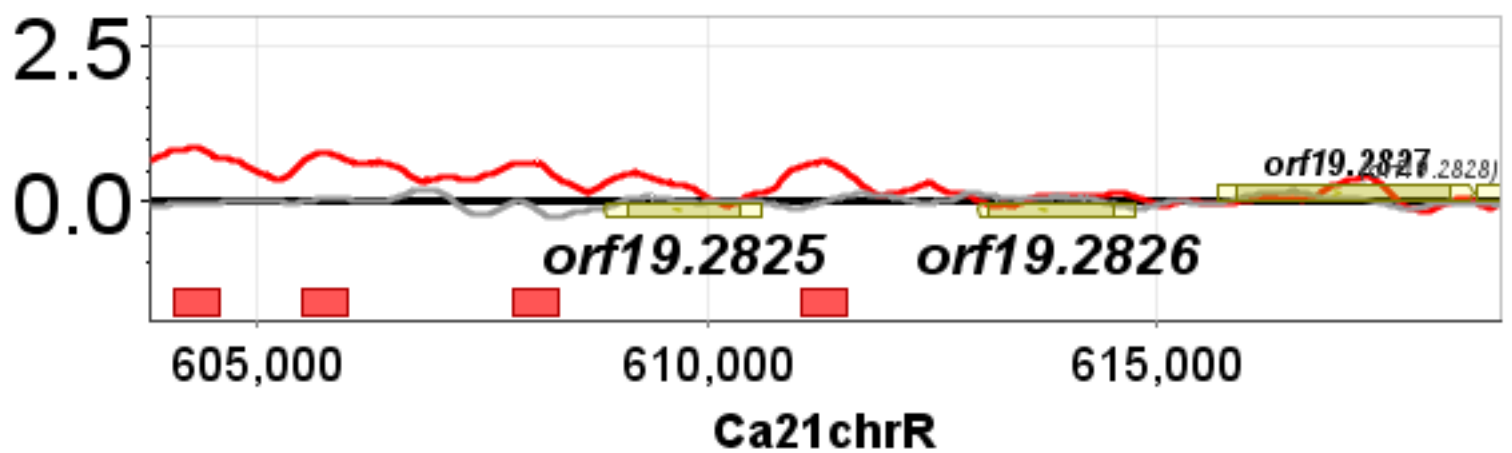



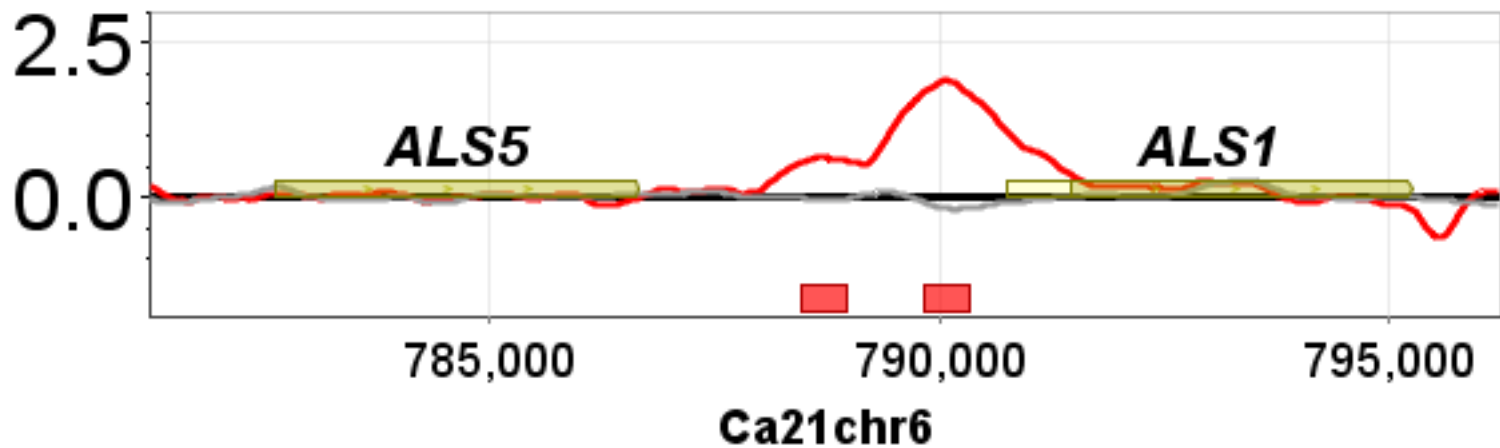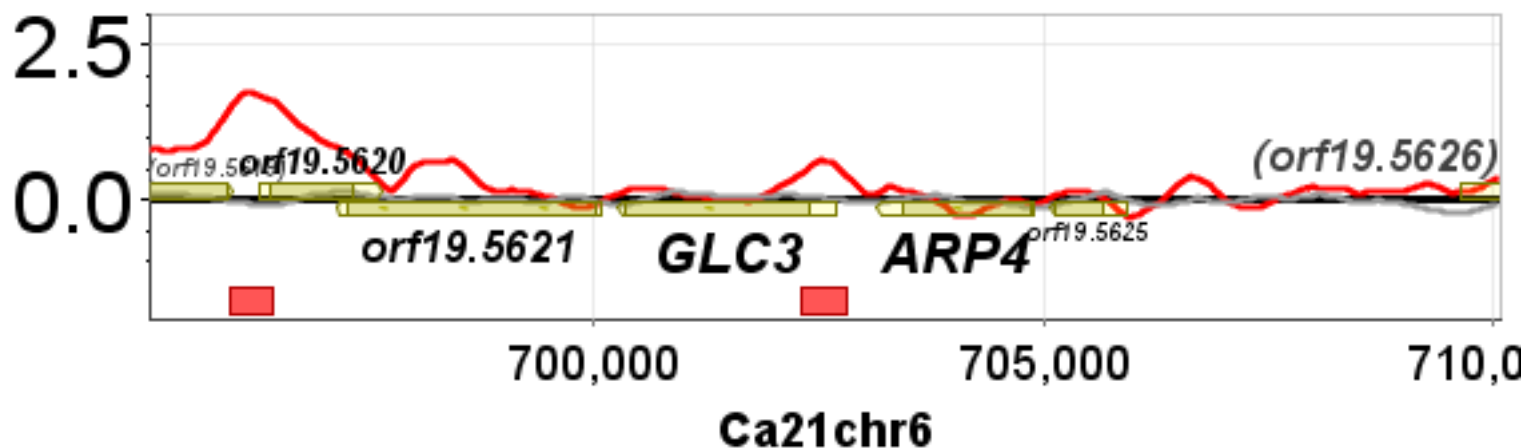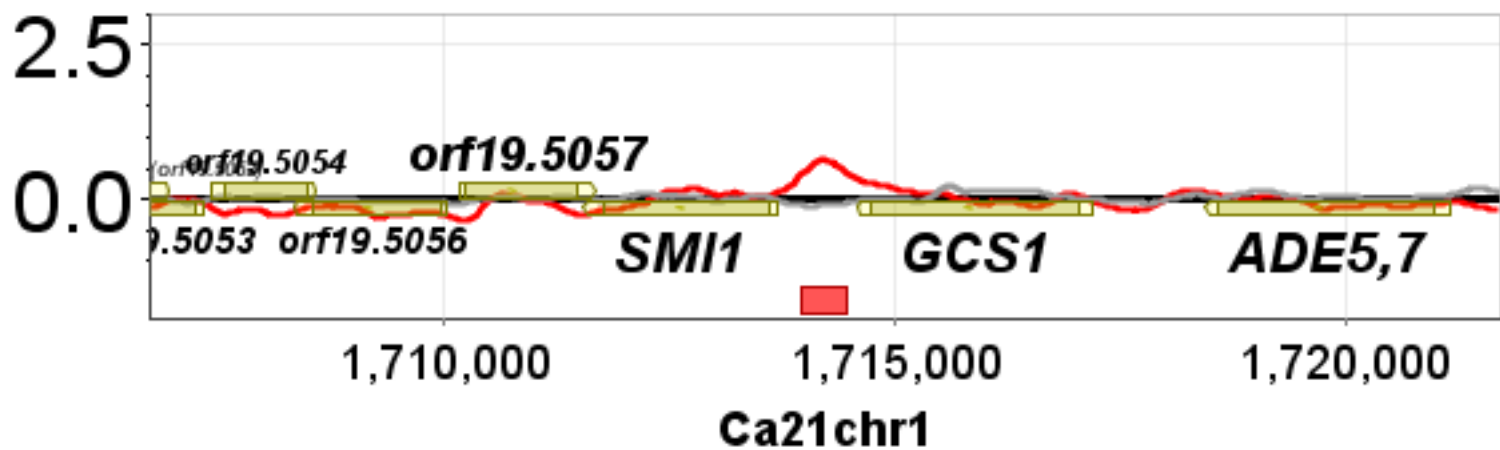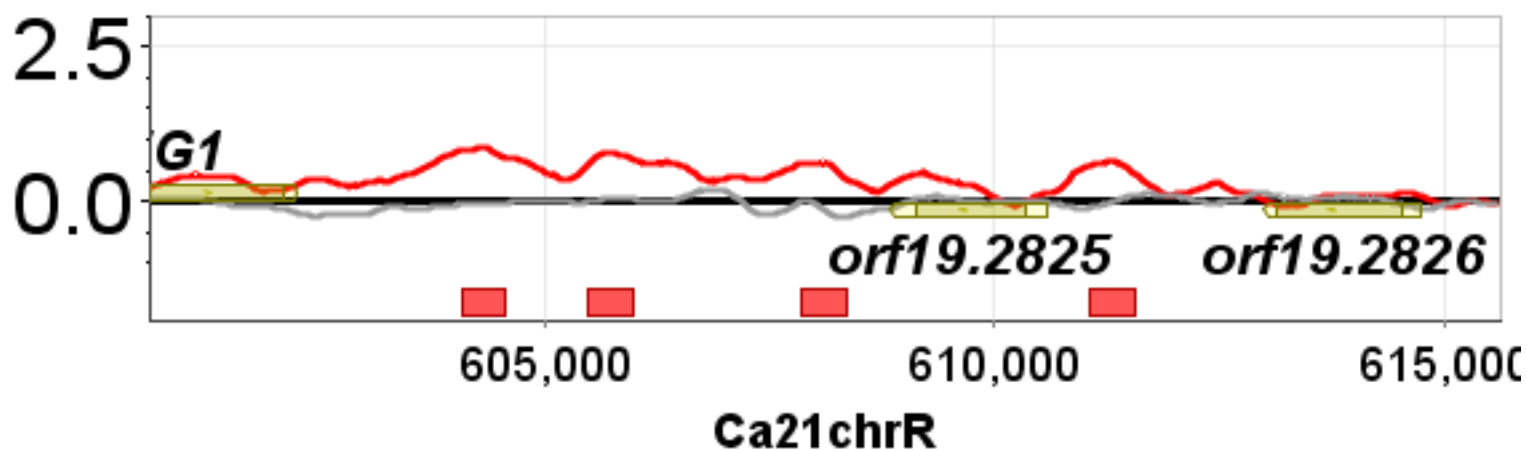

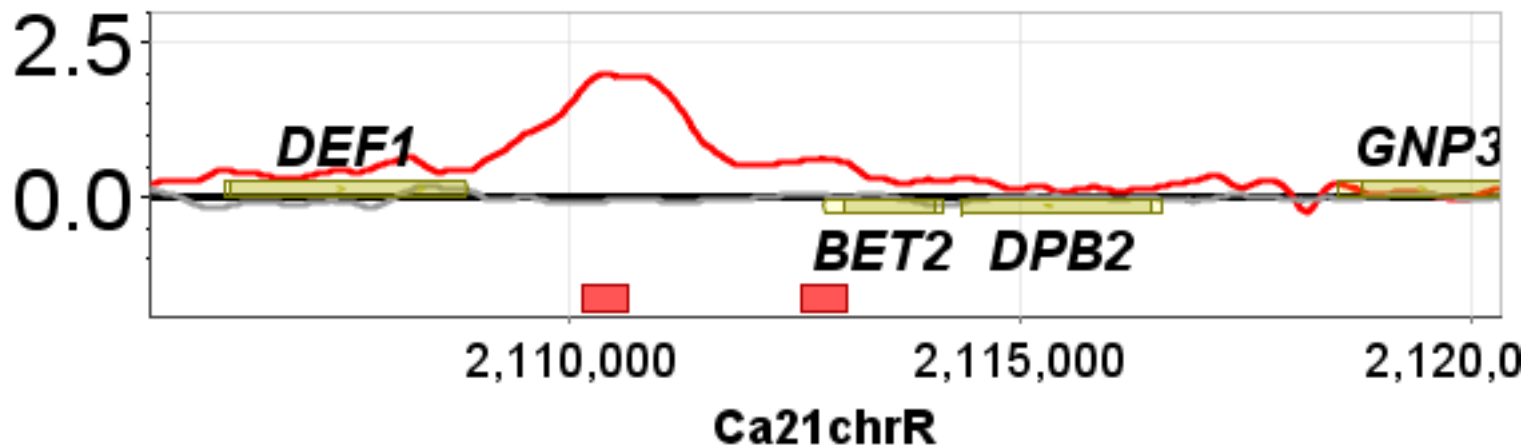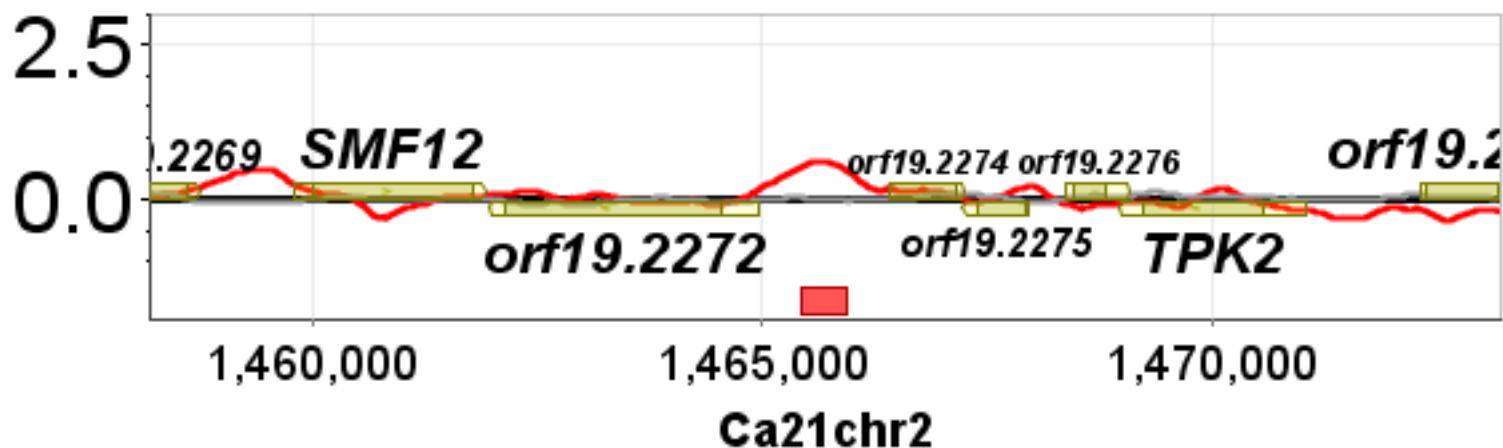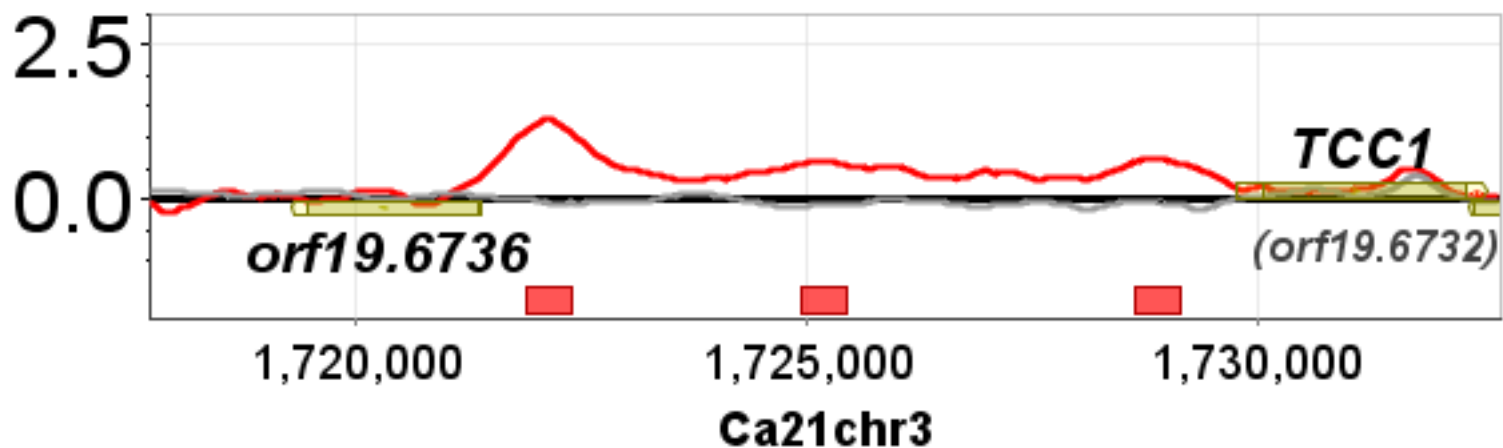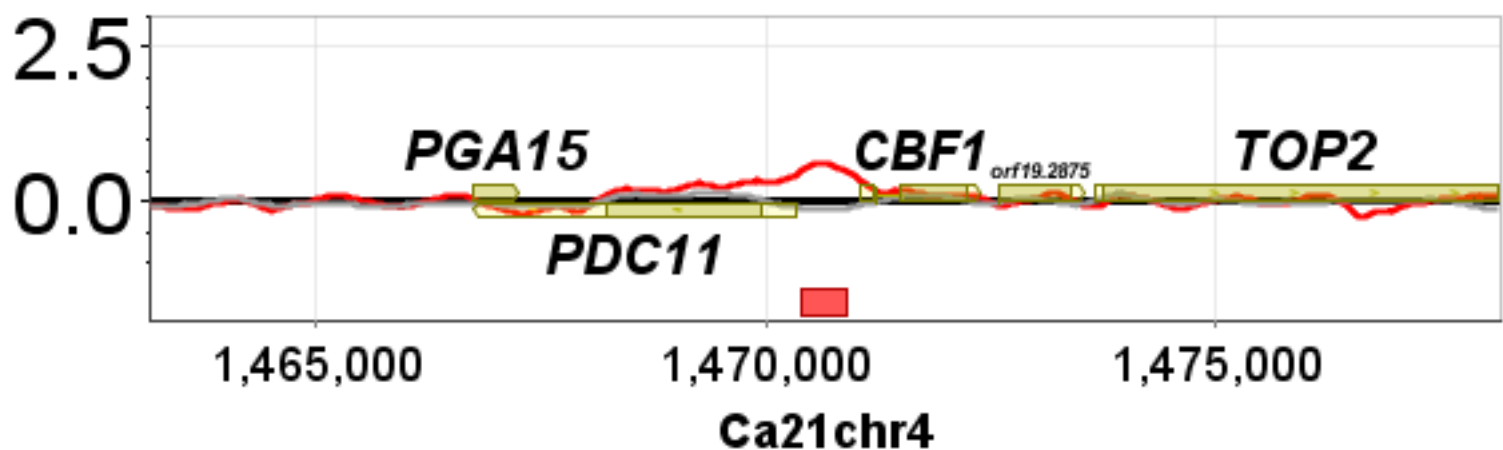

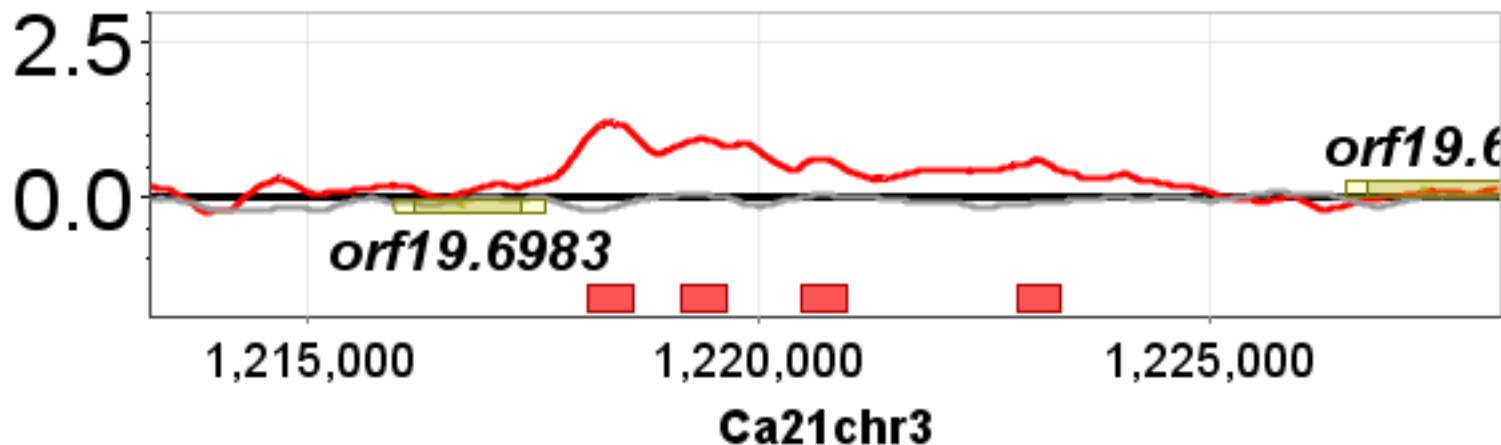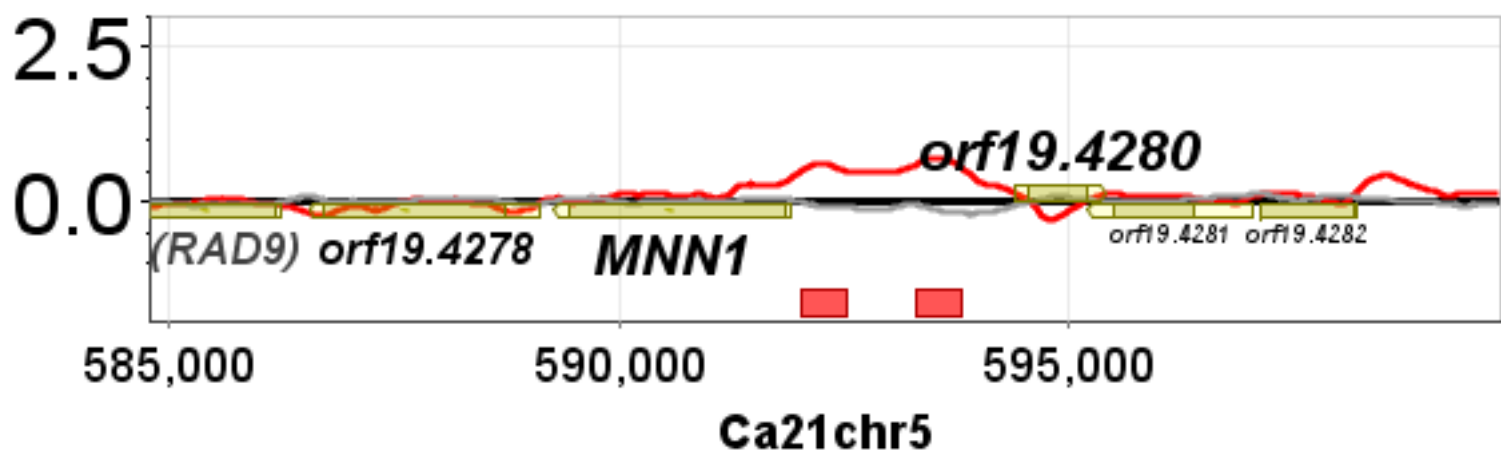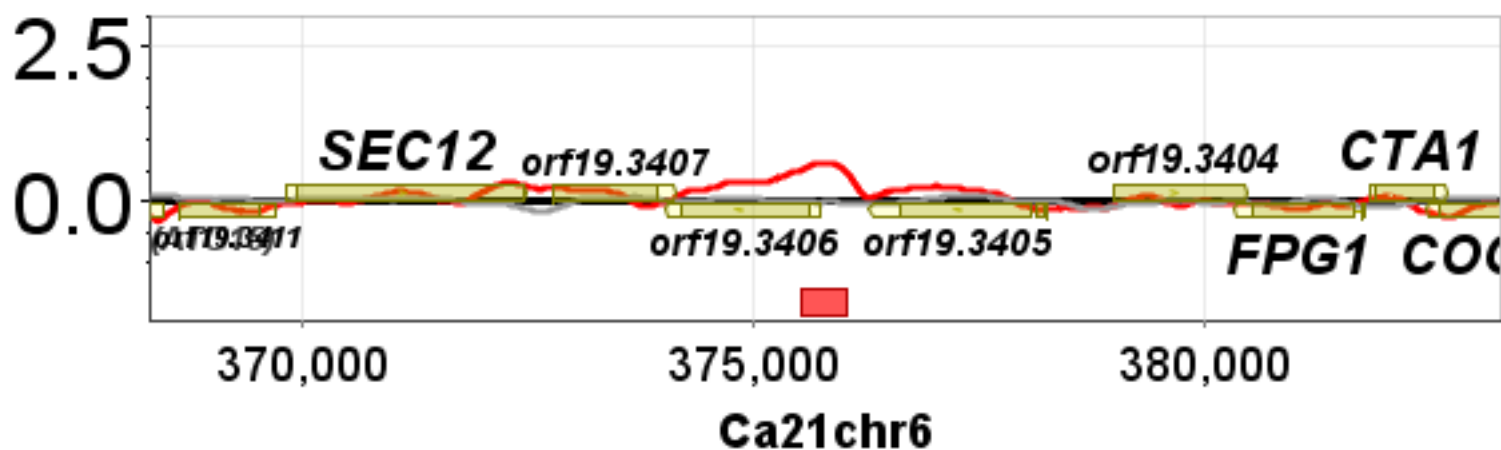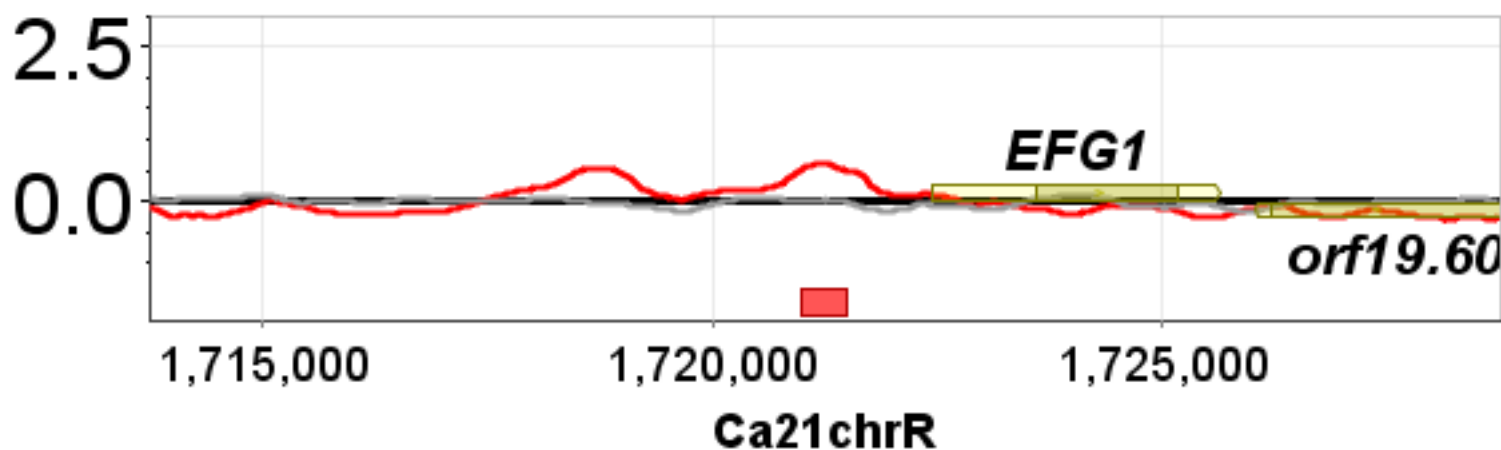

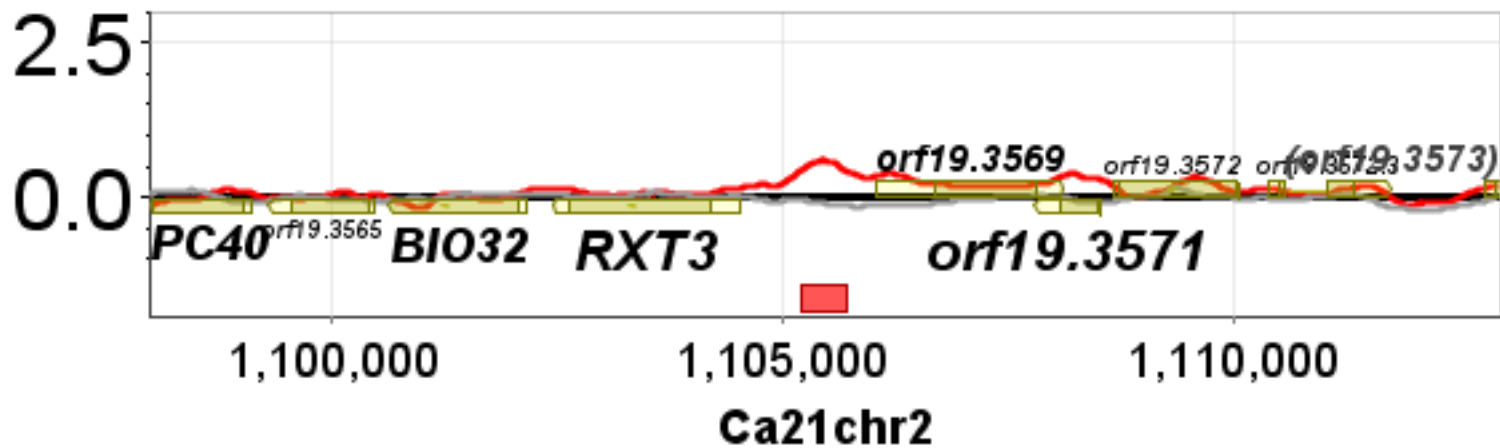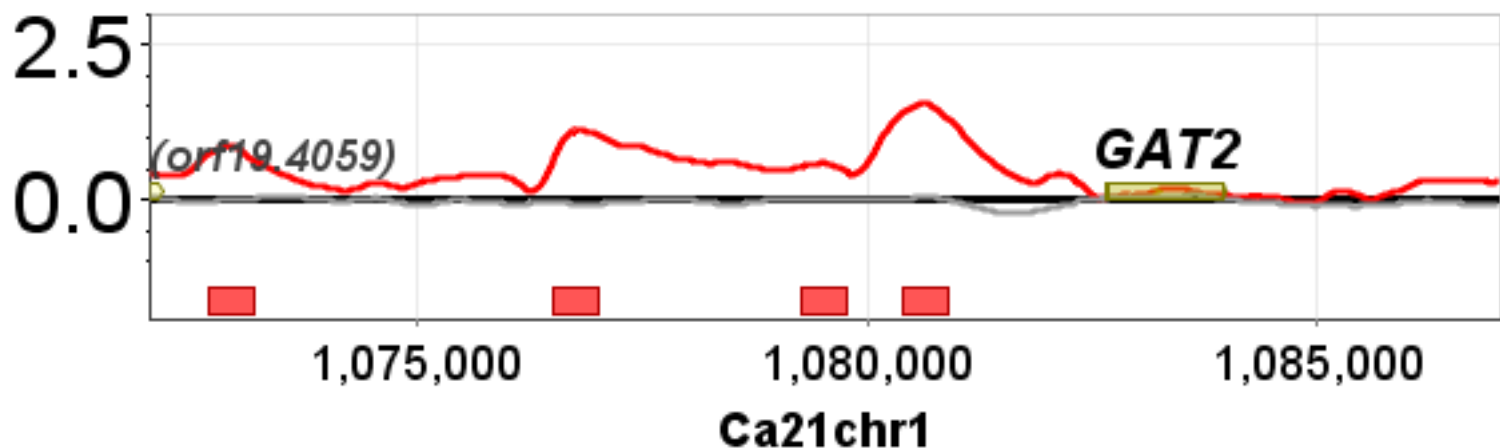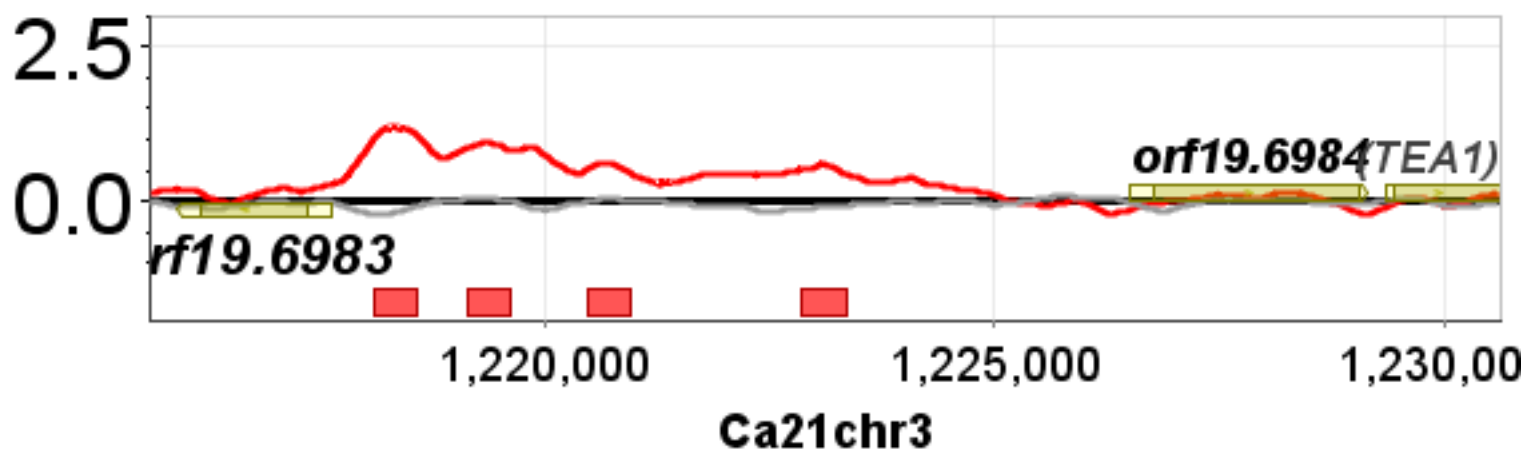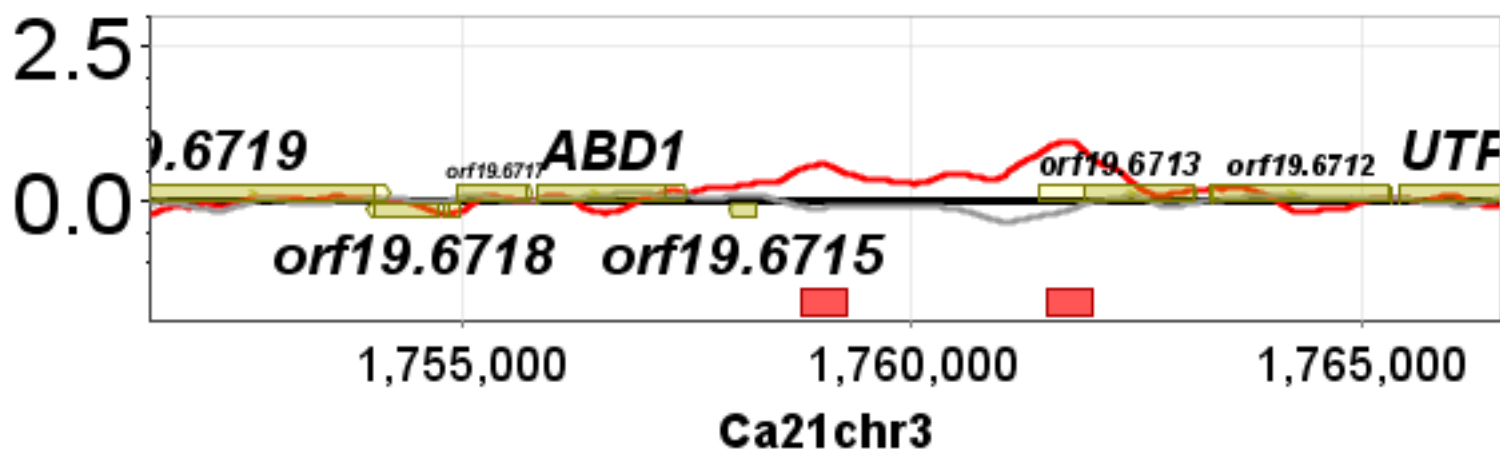

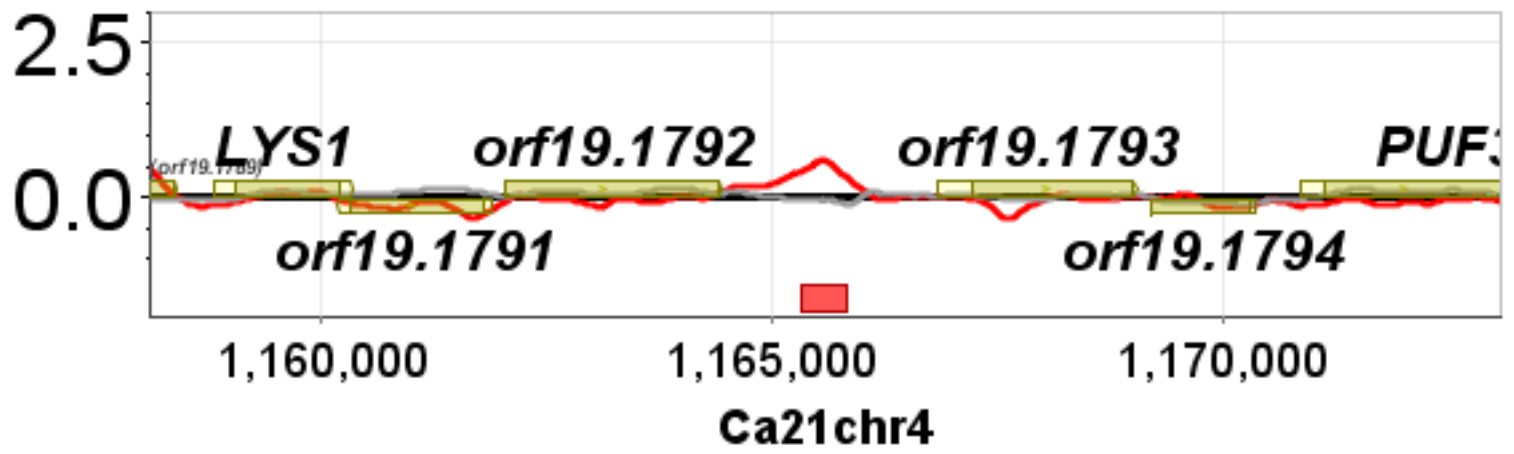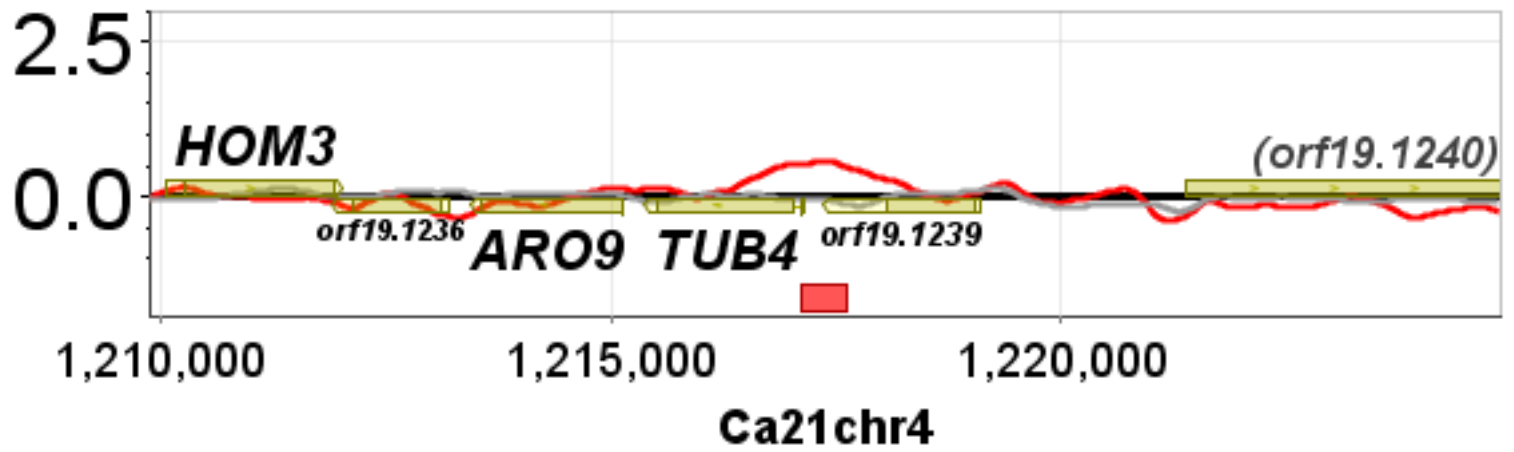

## **Full genome chromatin immunoprecipitation (ChIP-chip) mapping of Wor2 binding sites in opaque cells.**

Plots of 15kb regions centered on the set of 330 Wor2 binding sites in opaque cells.

Smoothed enrichment data for the wild type strain is shown in pink, for the *wor2* deletion strain in grey. Data for both the Wor2 n-terminal peptide antibody (solid lines) and the Wor2 c-terminal peptide antibody (dashed lines) are shown. The 500bp called peaks of Wor2 enrichment are indicated by the pink boxes in the lower track in each image.

Peaks are arranged in order of decreasing Wor2 enrichment. Enrichment ( $\log_2$ ) is indicated on the y-axis. Chromosomal locations and specific enrichment levels for the peak are indicated in the strip above each panel; when multiple peaks are present the enrichment value corresponds to the peak at the center of the plot. Yellow boxes correspond to genes; 5' or 3' untranslated regions are included as lighter shaded portions of the box. Genes plotted above the bold line read in the sense direction; genes plotted below the line read in the antisense direction. Plots produced using the SnapShot Function in MochiView v1.46 (Homann and Johnson, 2010).

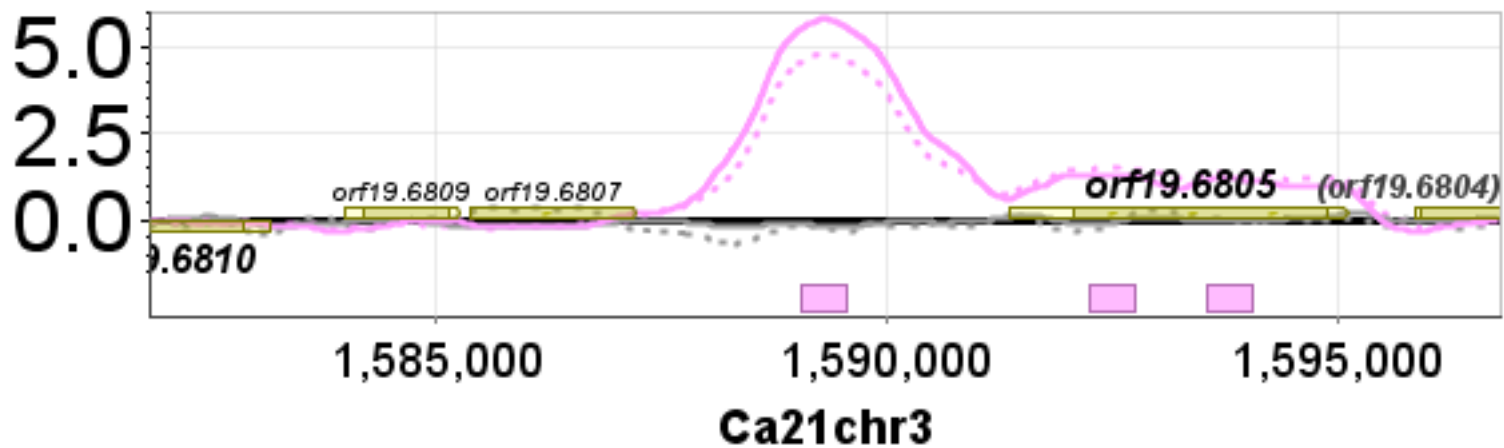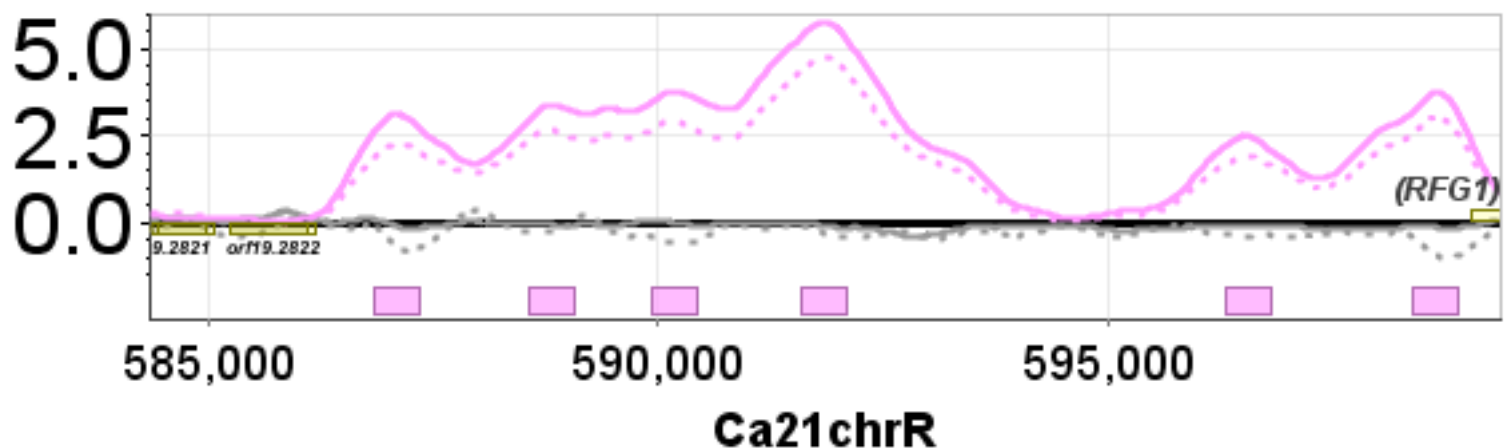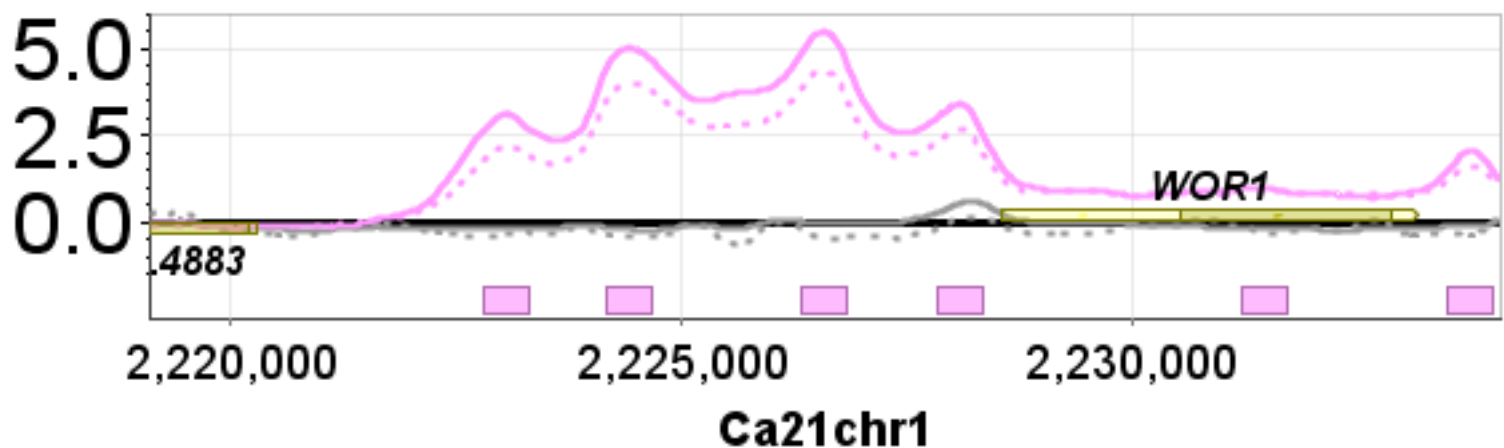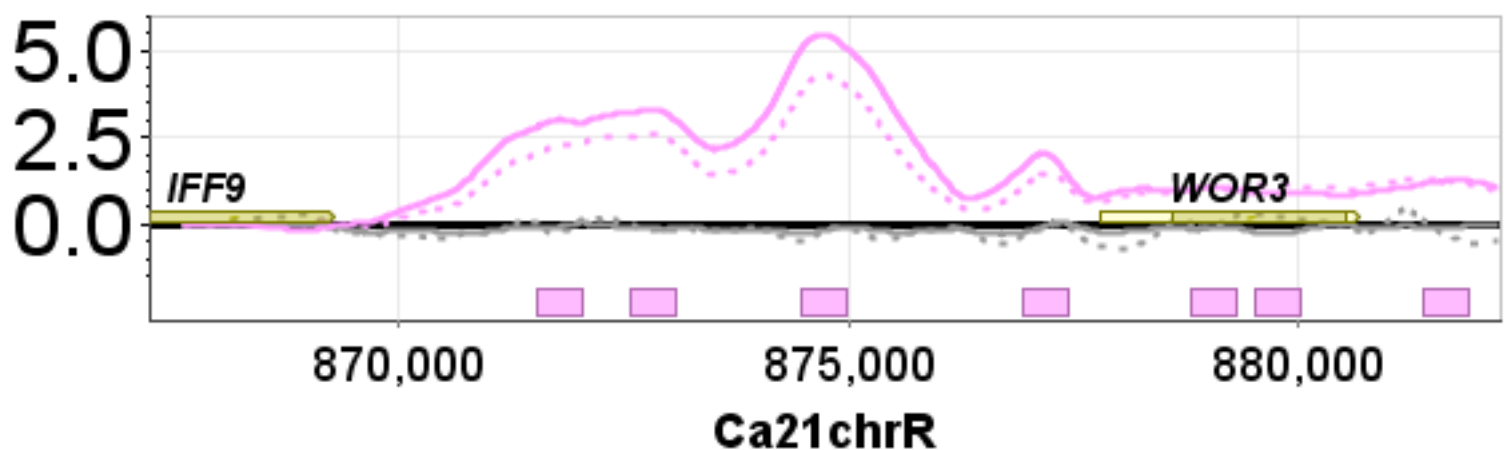

[5.182] Ca21chr1:565019-580018 [+] [orf19.2962, orf19.2963, orf19.2961, orf19.2964, FRS2]

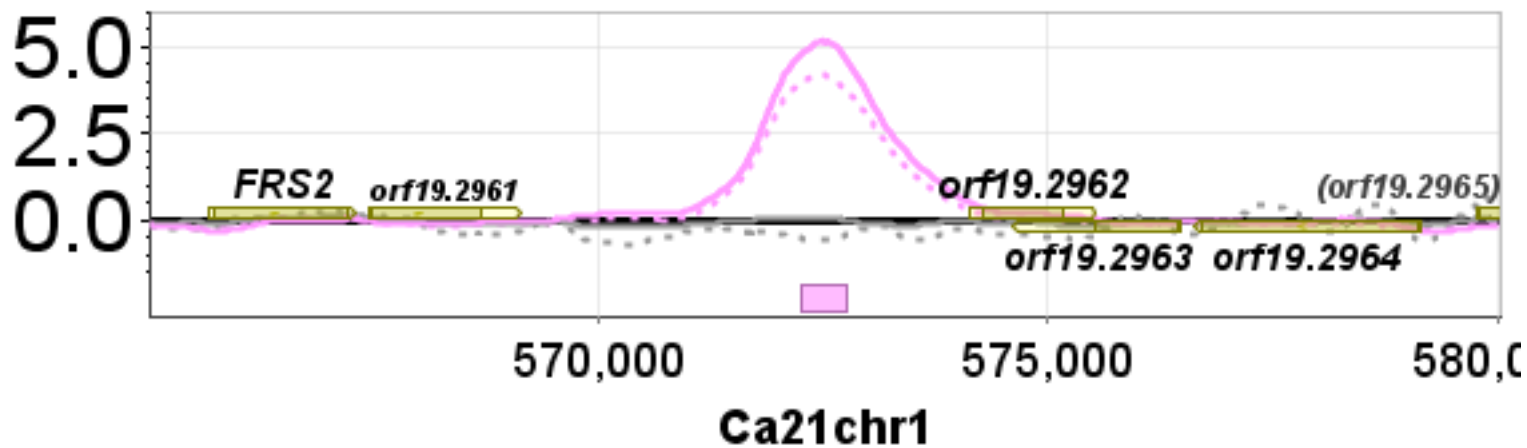

[5.03] Ca21chr1:2216926-2231925 [+] [ntar\_207, WOR1, orf19.4883, ntar\_206, orf19.4882]

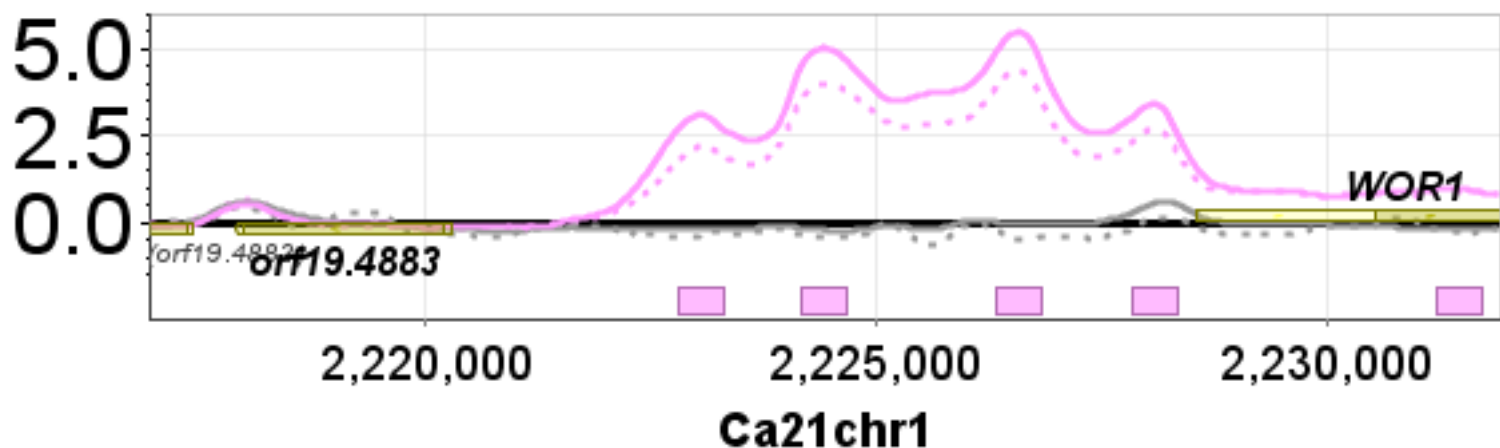

[4.873] Ca21chr7:904772-919771 [+] [ntar\_1151, ntar\_1152, orf19.7151, orf19.7152, ntar\_1153]

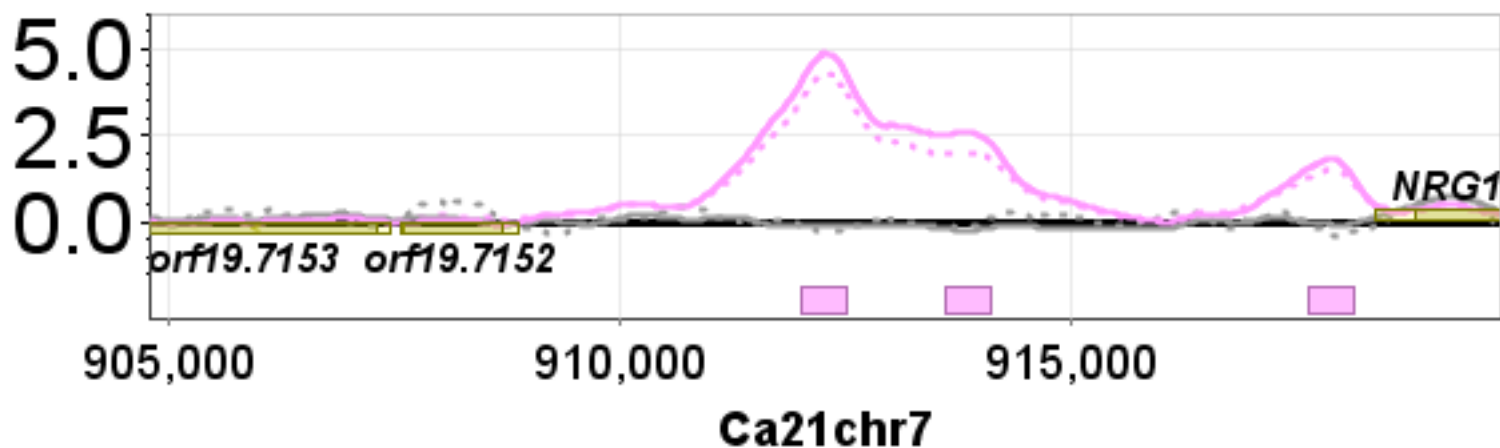

[4.865] Ca21chr3:1717806-1732805 [+] [orf19.6736, TCC1, ntar\_685, orf19.6732]

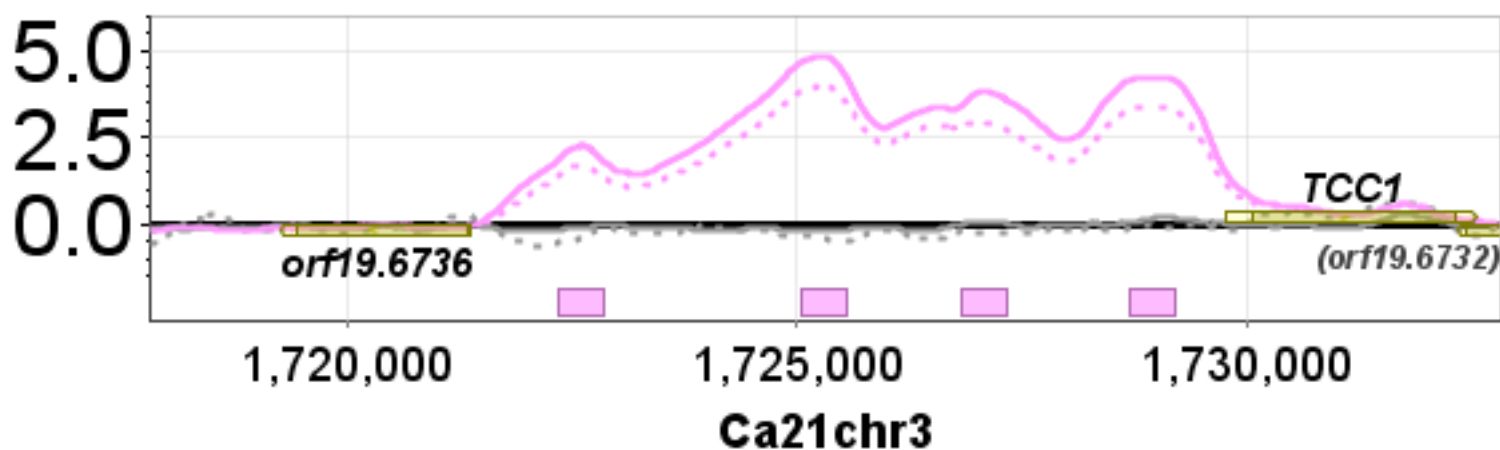



[4.859] Ca21chr3:1751213-1766212 [+] [orf19.6715, ntar\_688, orf19.6713, ABD1, orf19.6718]

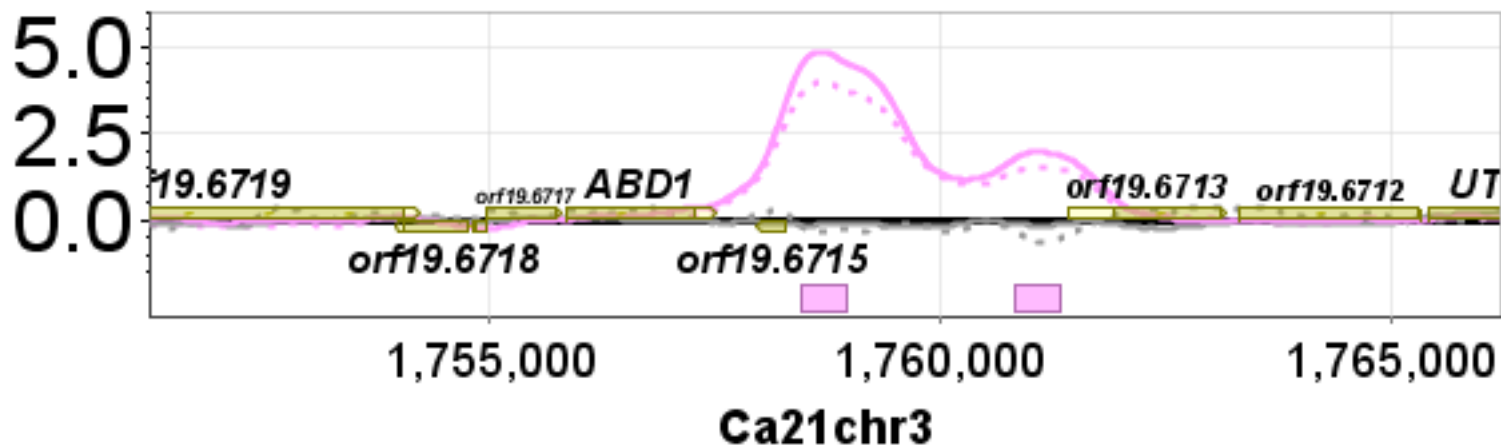

[4.406] Ca21chrR:1710559-1725558 [+] [ntar\_1351, ntar\_1353, ntar\_1352, tq(qcc)1, EFG1]

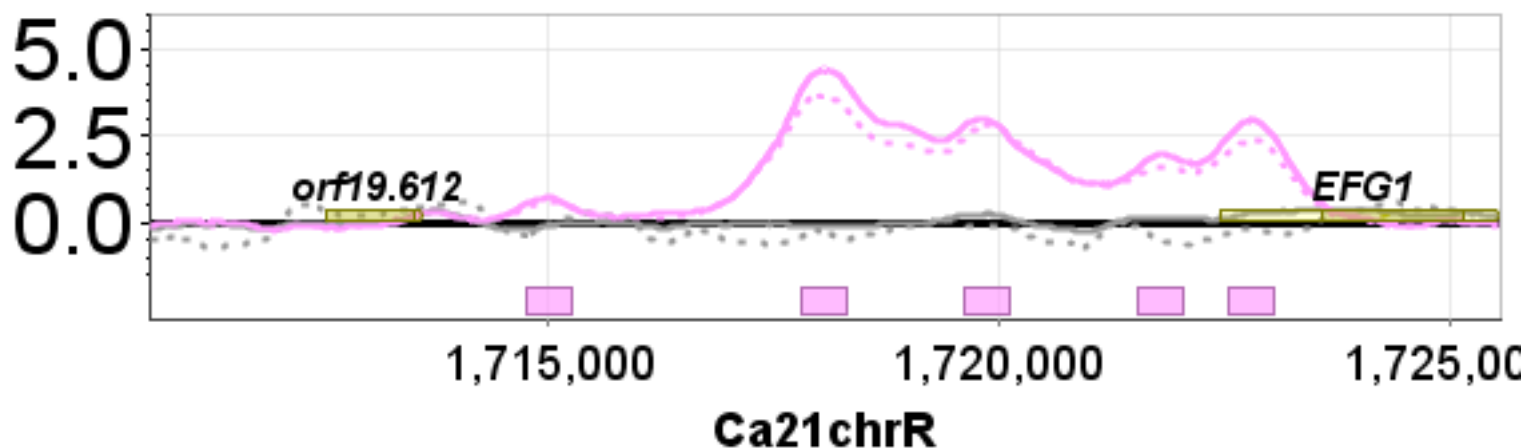

[4.291] Ca21chr3:1114011-1129010 [+] [ntar\_614, ntar\_615, ntar\_616, ntar\_617, WOR2]

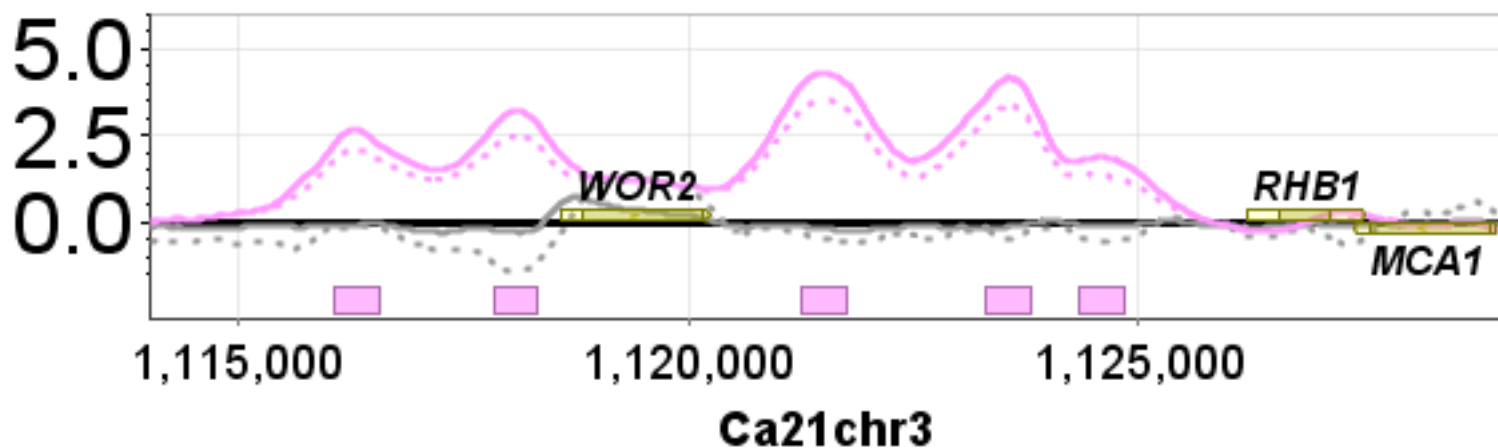

[4.245] Ca21chr3:1721461-1736460 [+] [TCC1, orf19.6732, orf19.6731.1, orf19.6731, ntar\_686]

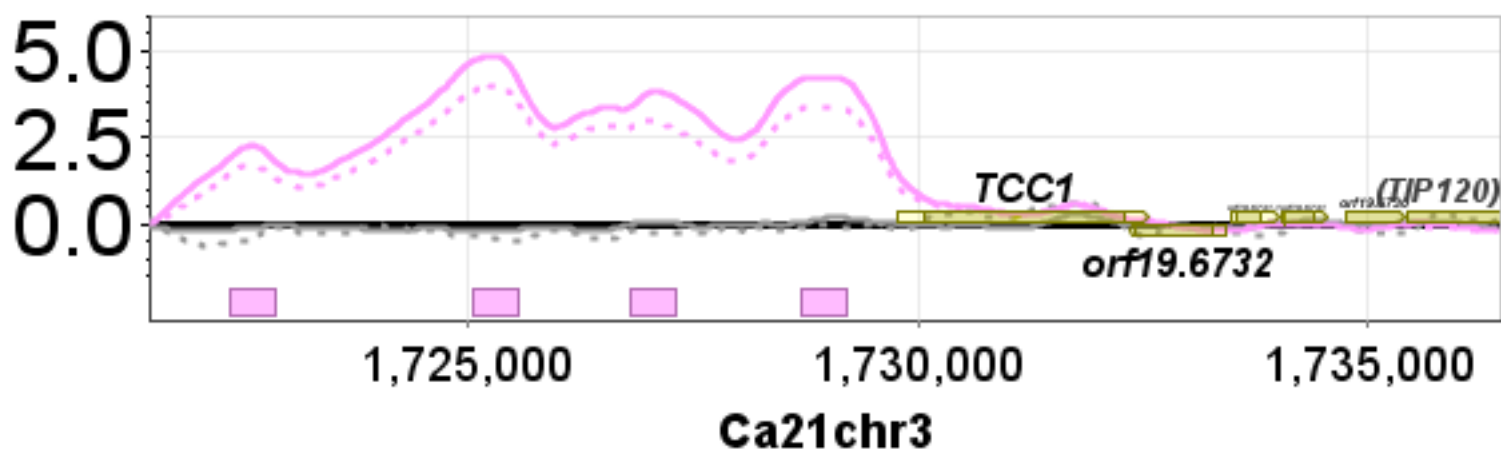

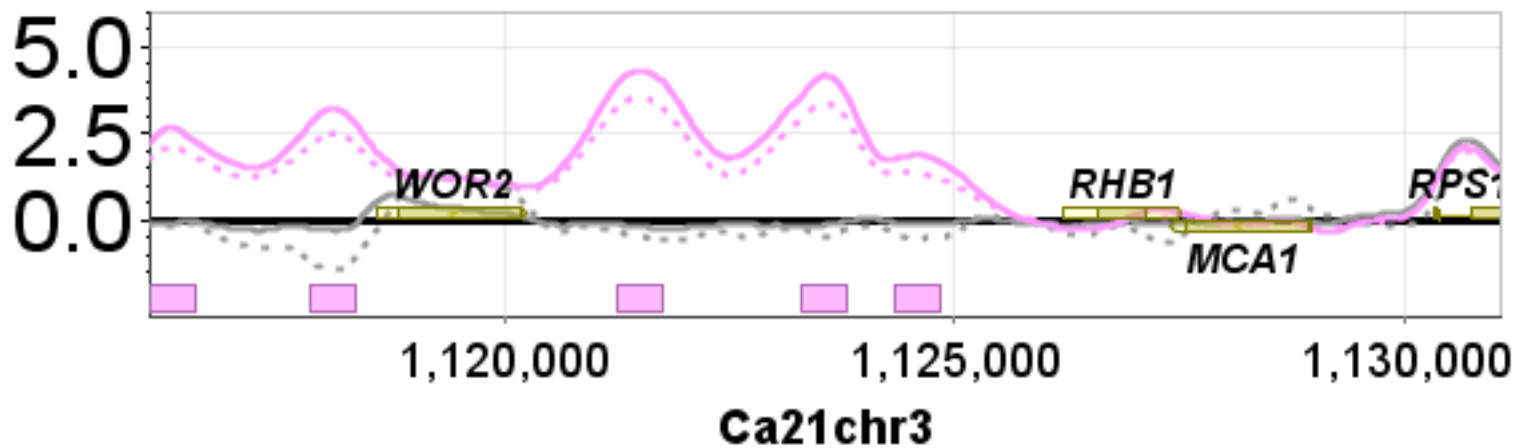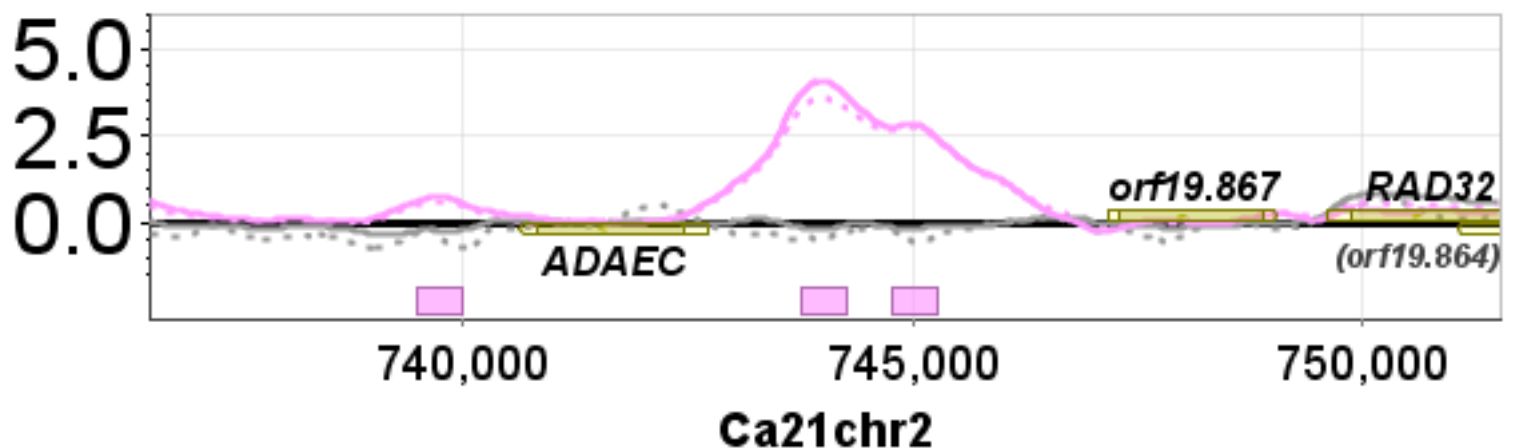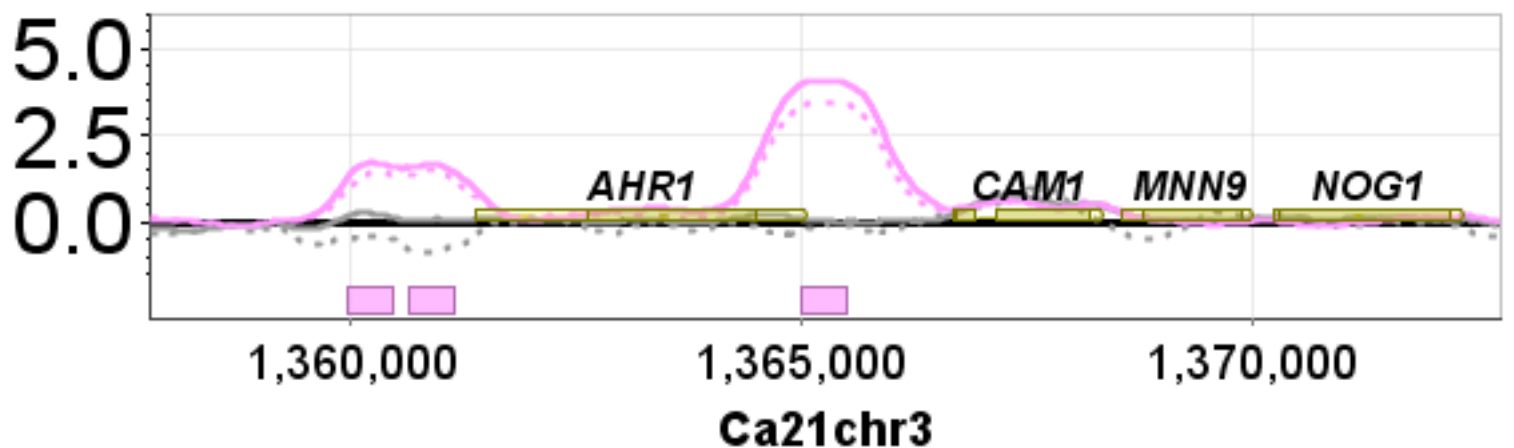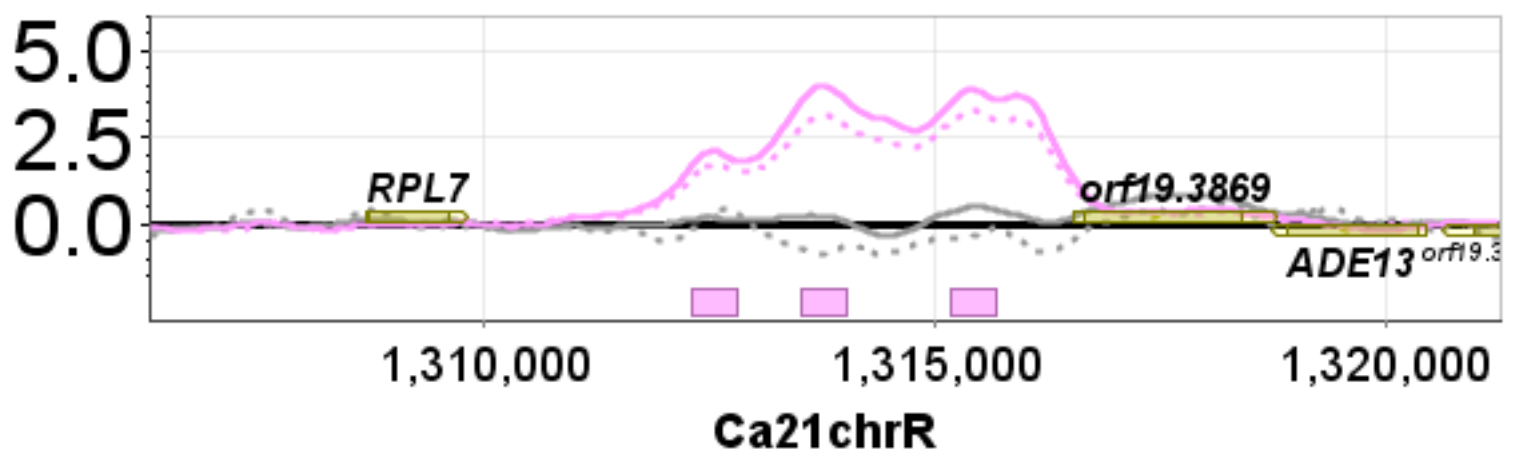

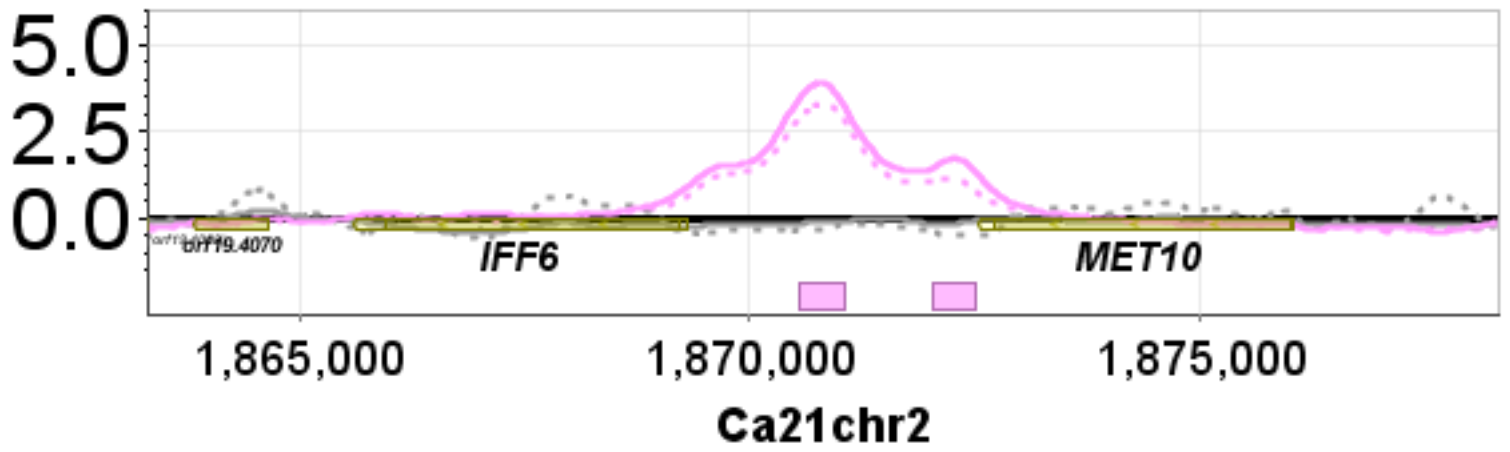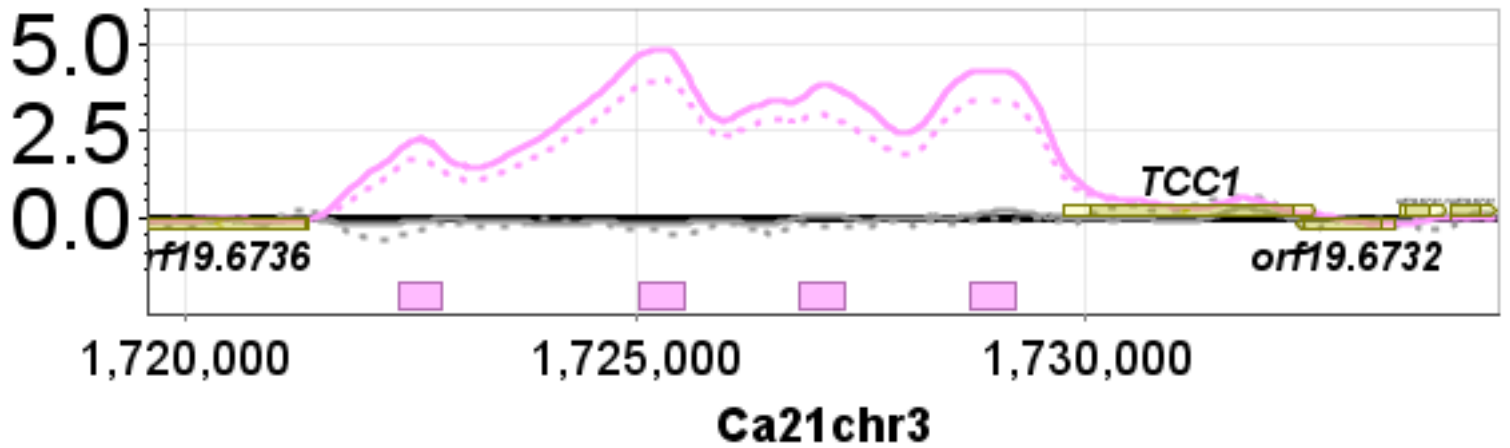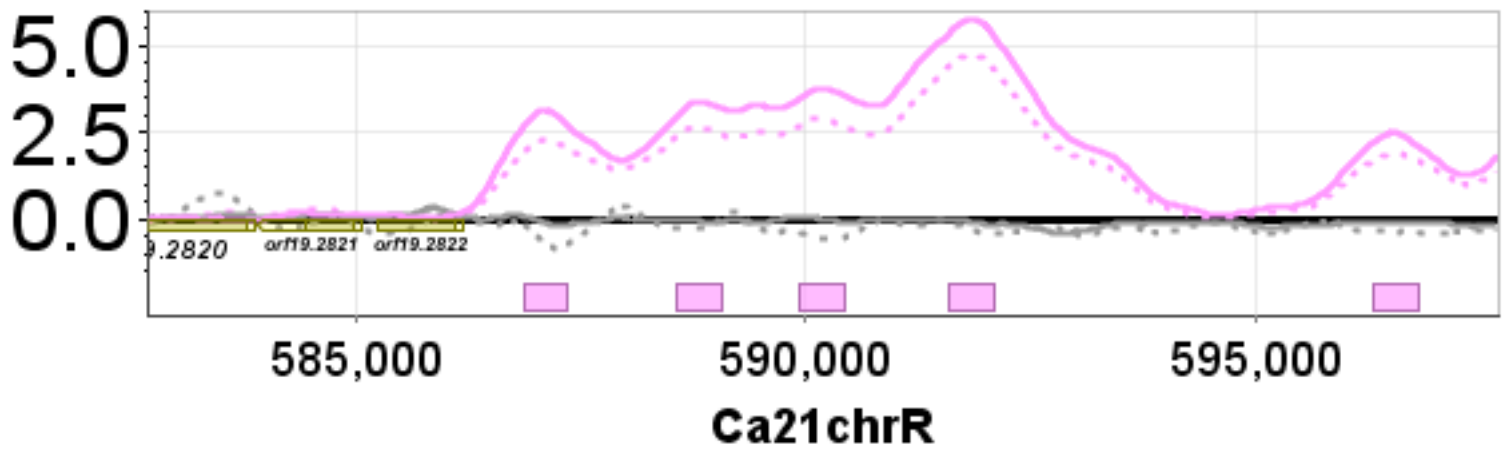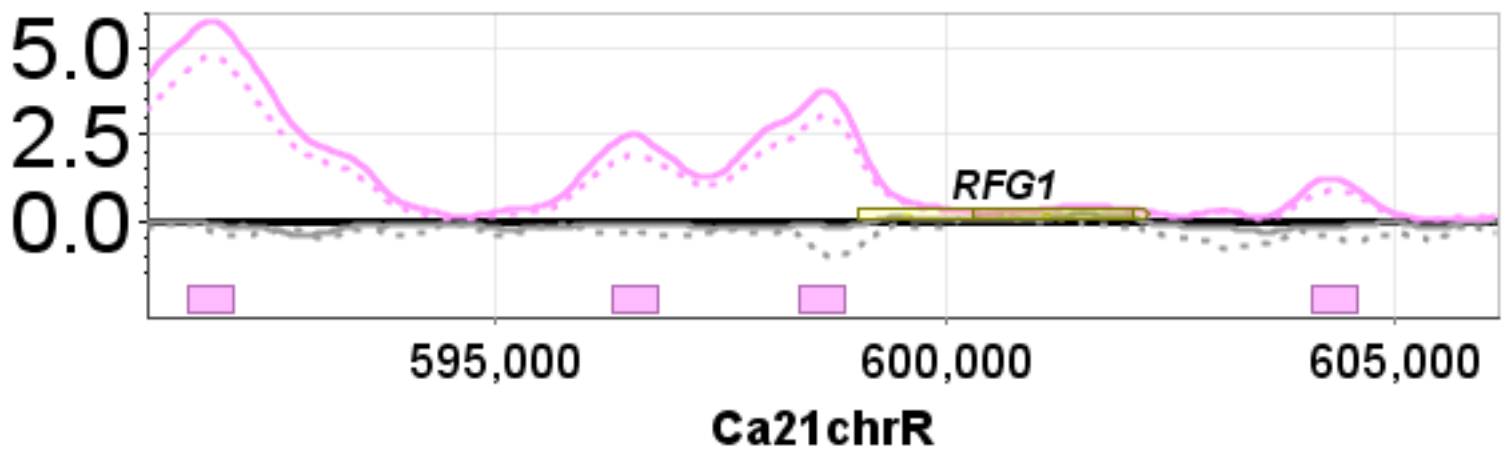

[3.621] Ca21chr5:247207-262206 [+] [orf19.1958, orf19.1959, ntar\_866, ntar\_867, ntar\_864]

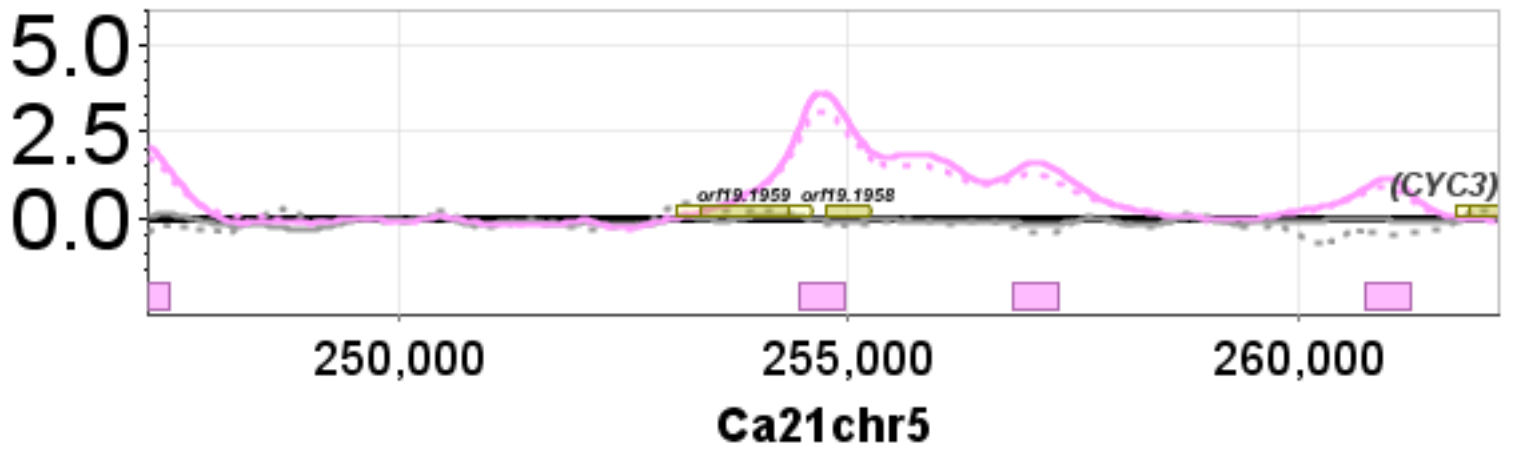

[3.607] Ca21chr5:489161-504160 [+] [PTH2, ntar\_890, orf19.4230, orf19.4229, PTH1]

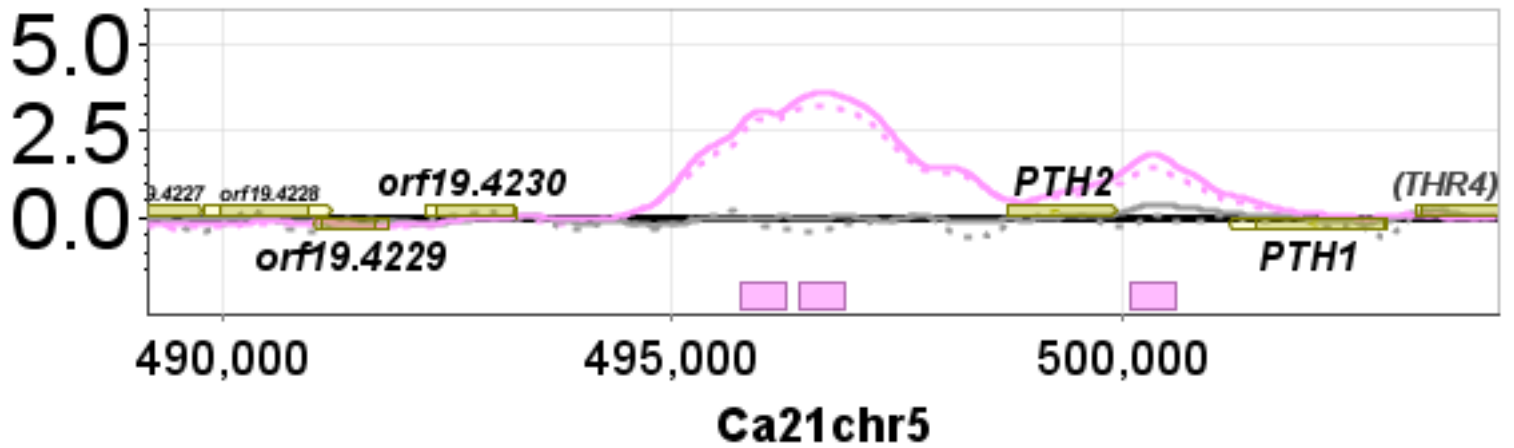

[3.456] Ca21chr1:1070121-1085120 [+] [GAT2, orf19.4057, orf19.4059, orf19.450]

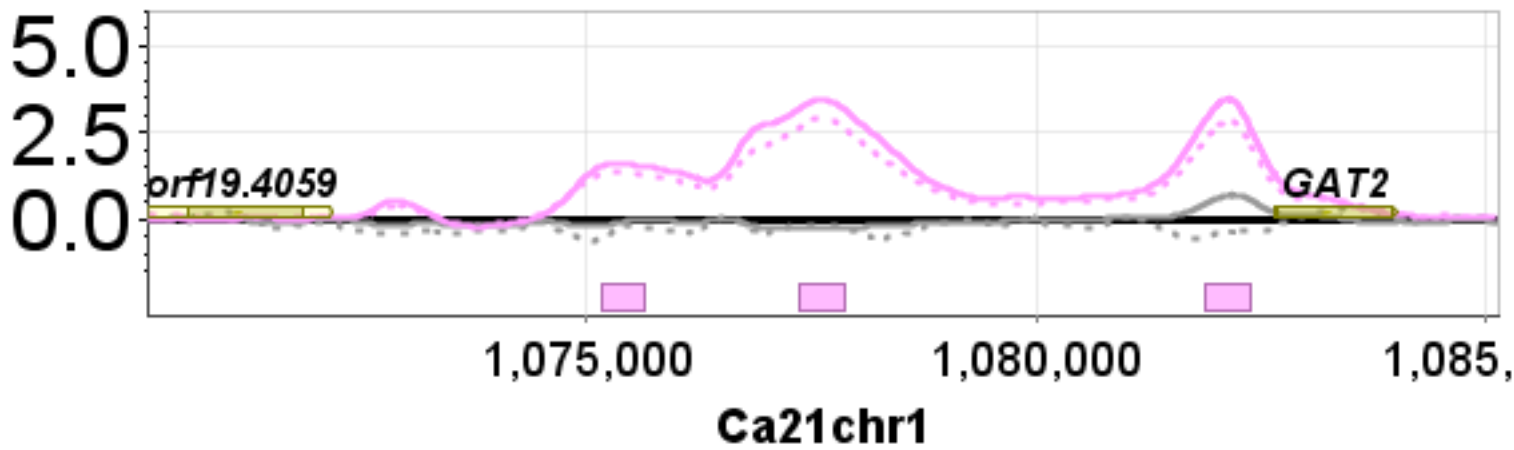

[3.442] Ca21chrR:1403975-1418974 [+] [ntar\_1310, RGS2, ntar\_1311, ntar\_1312, ntar\_1314]

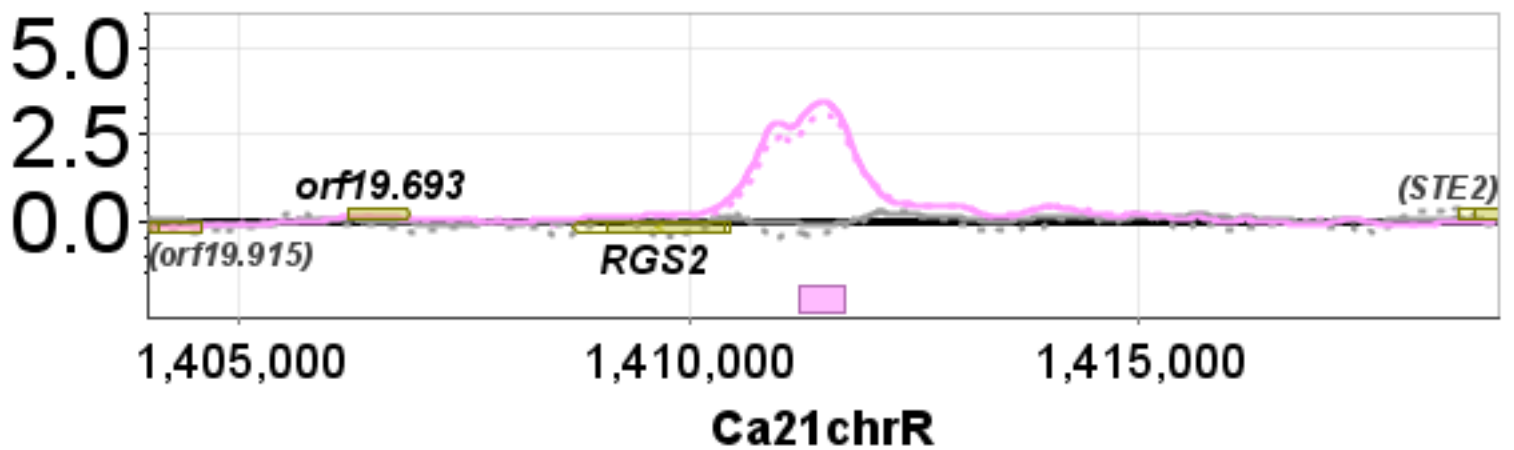

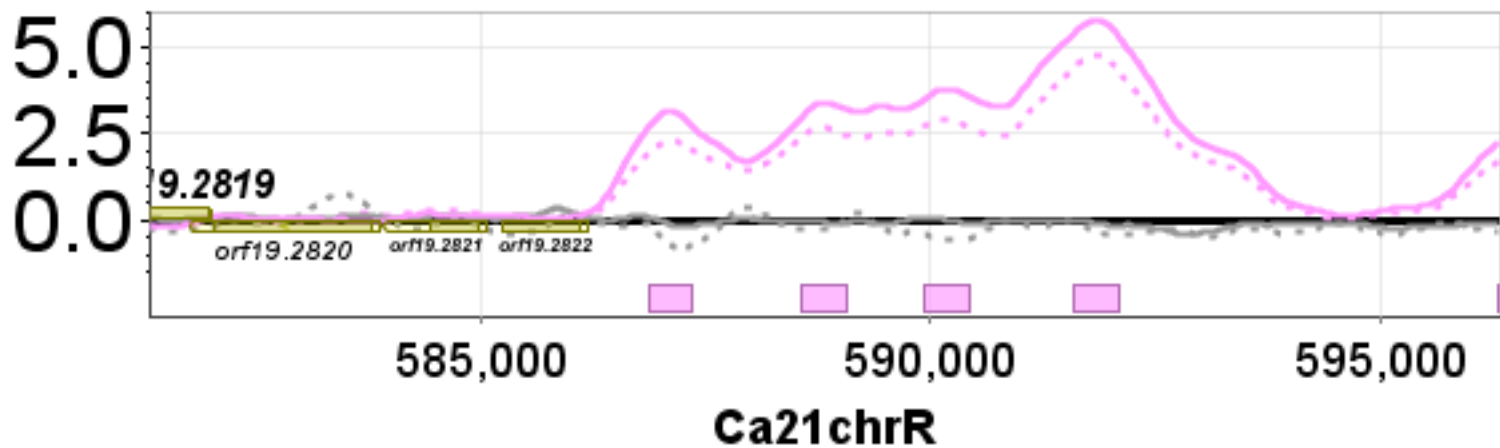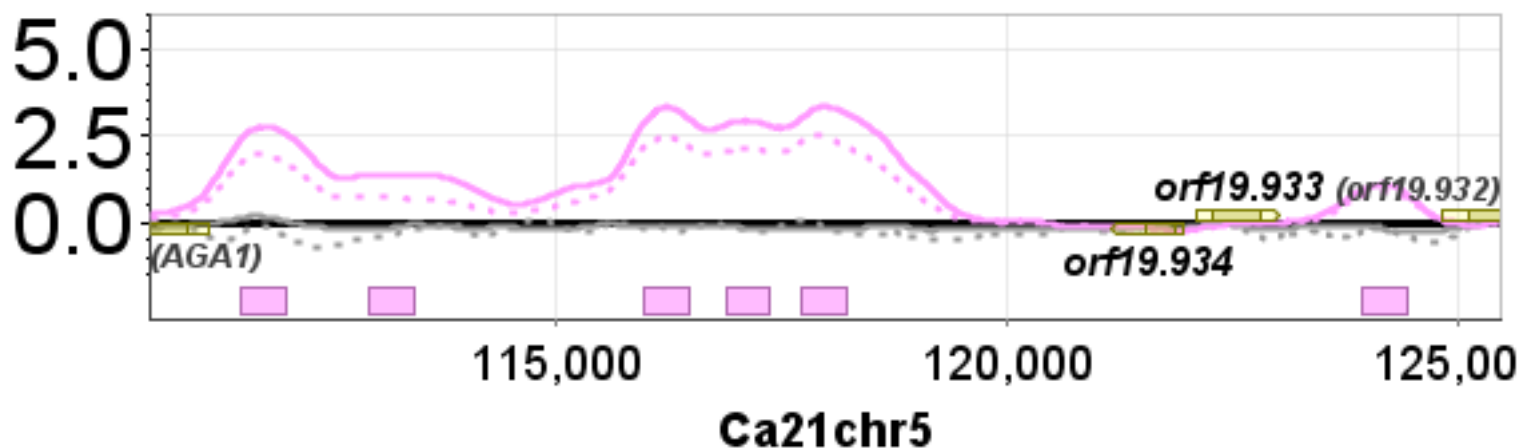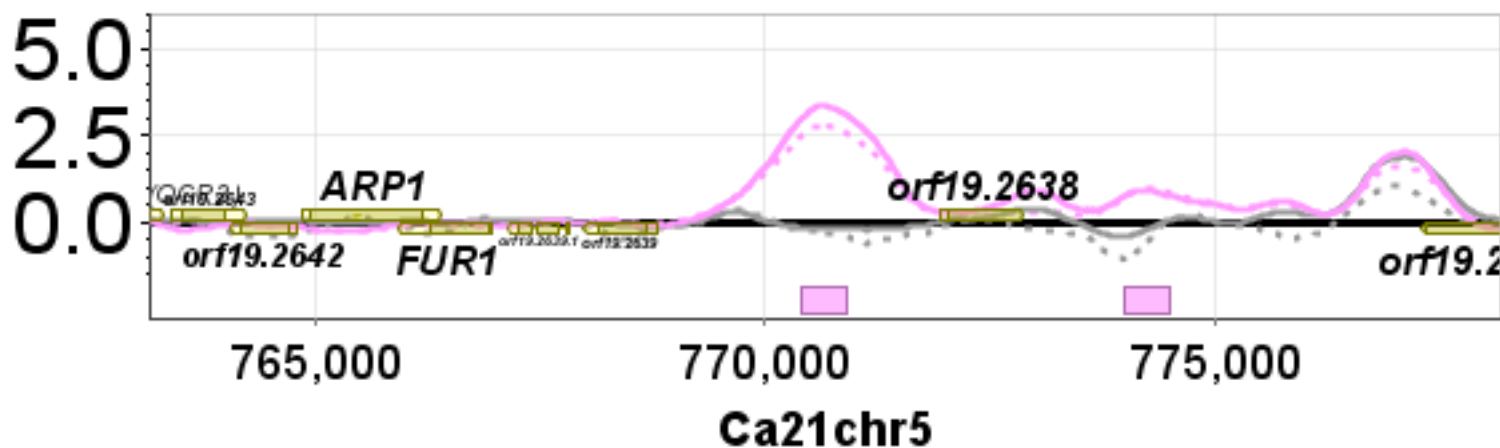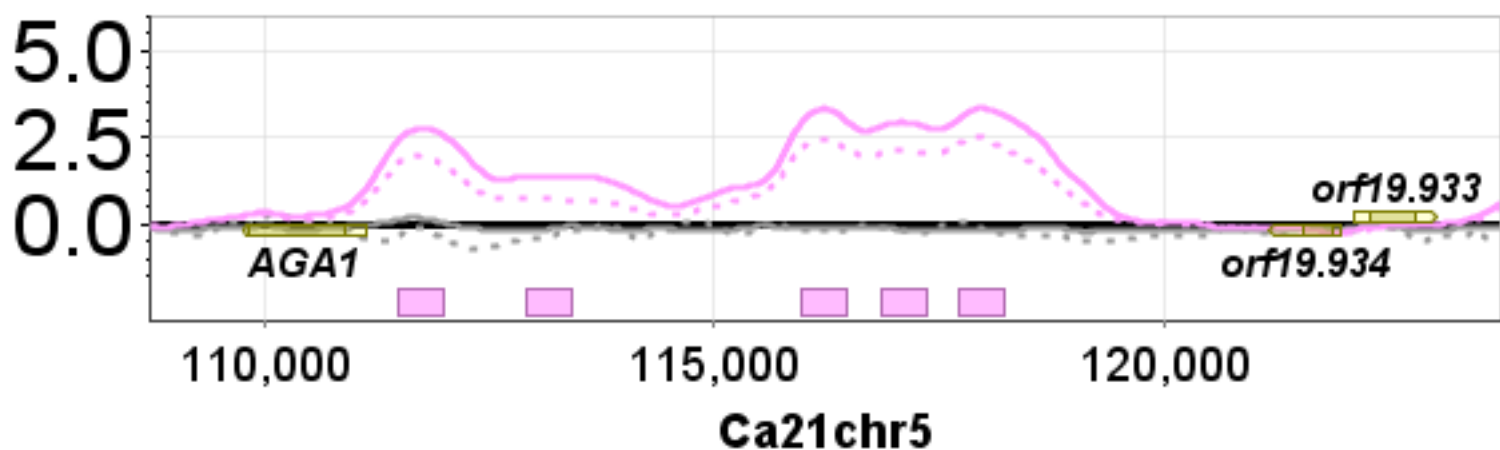

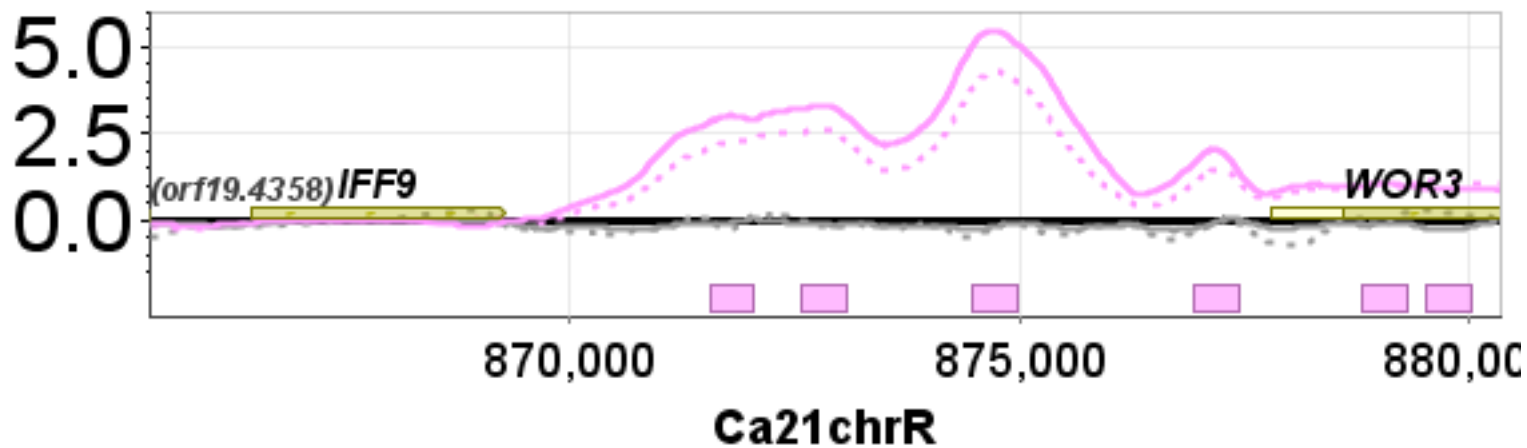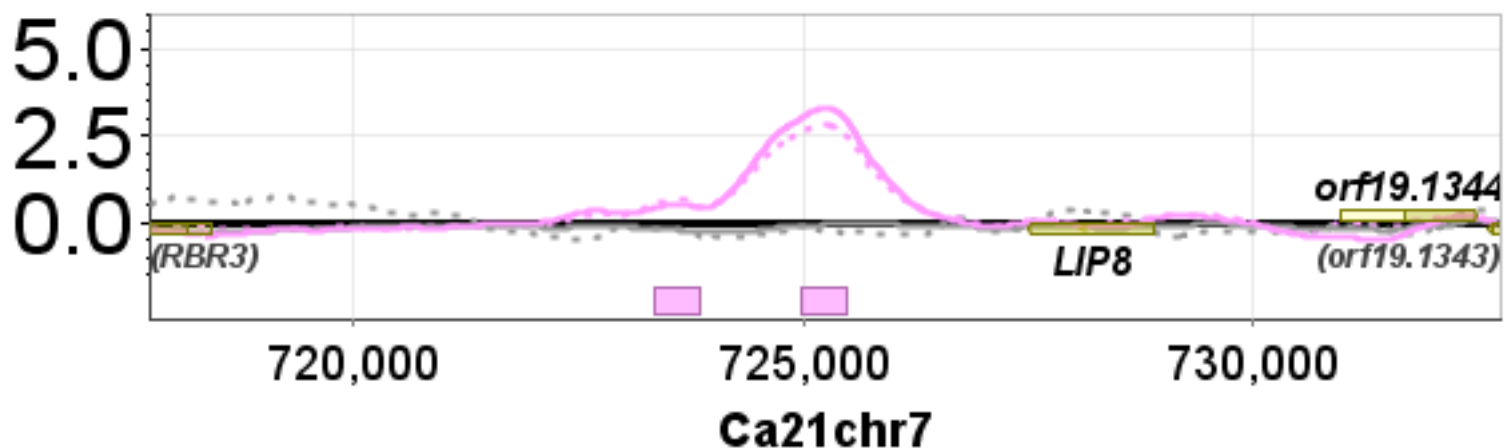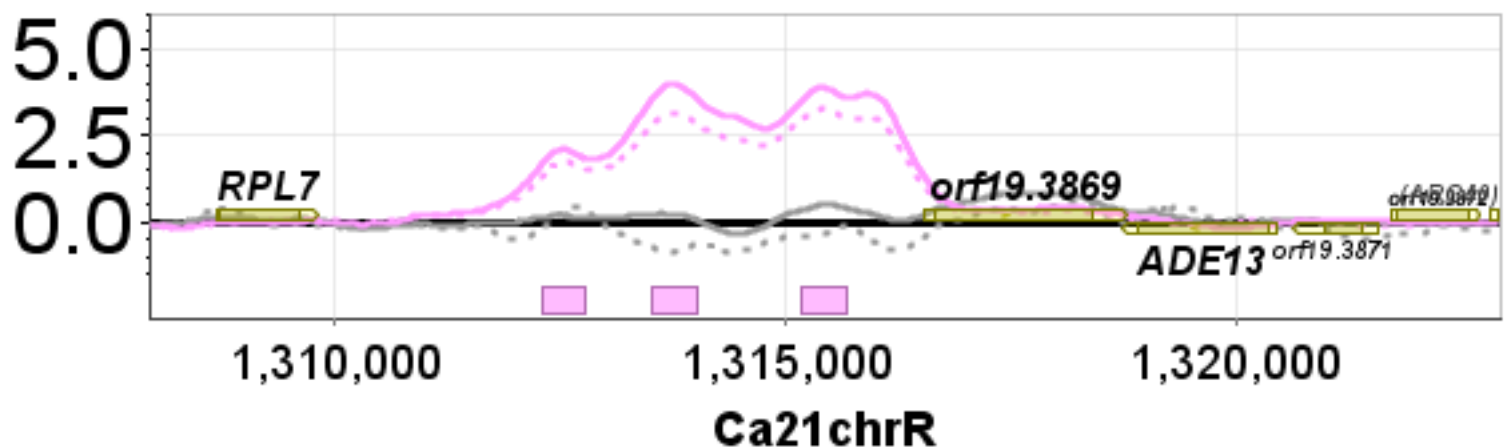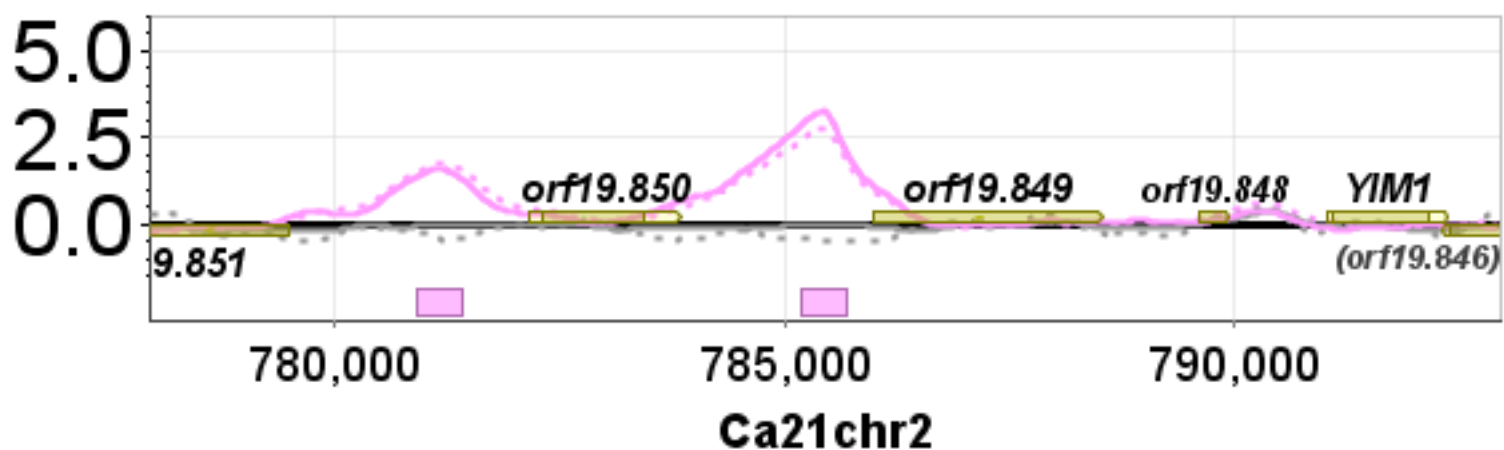

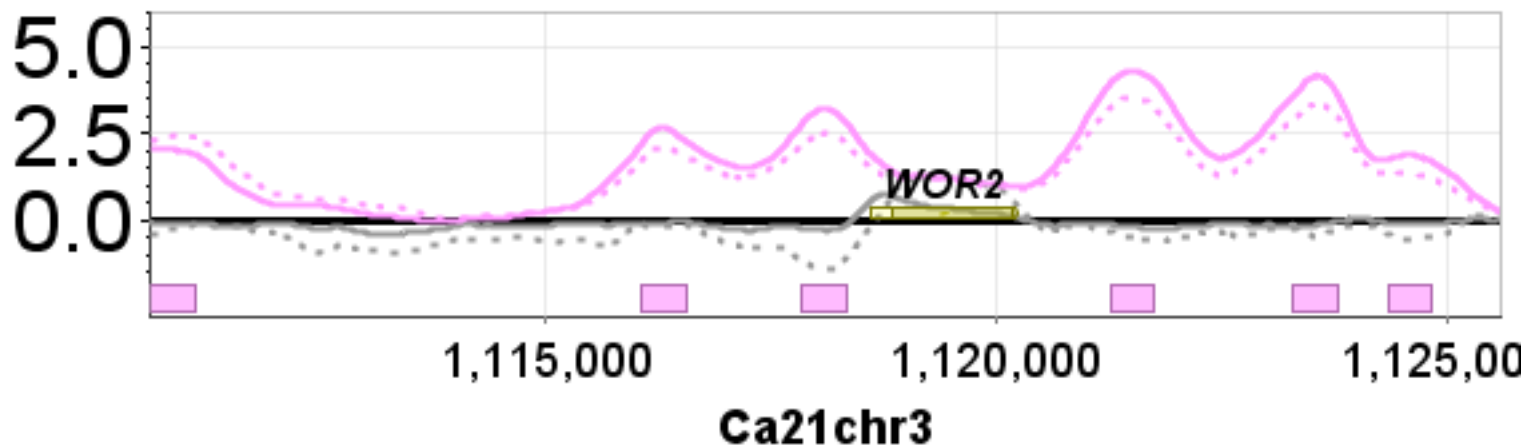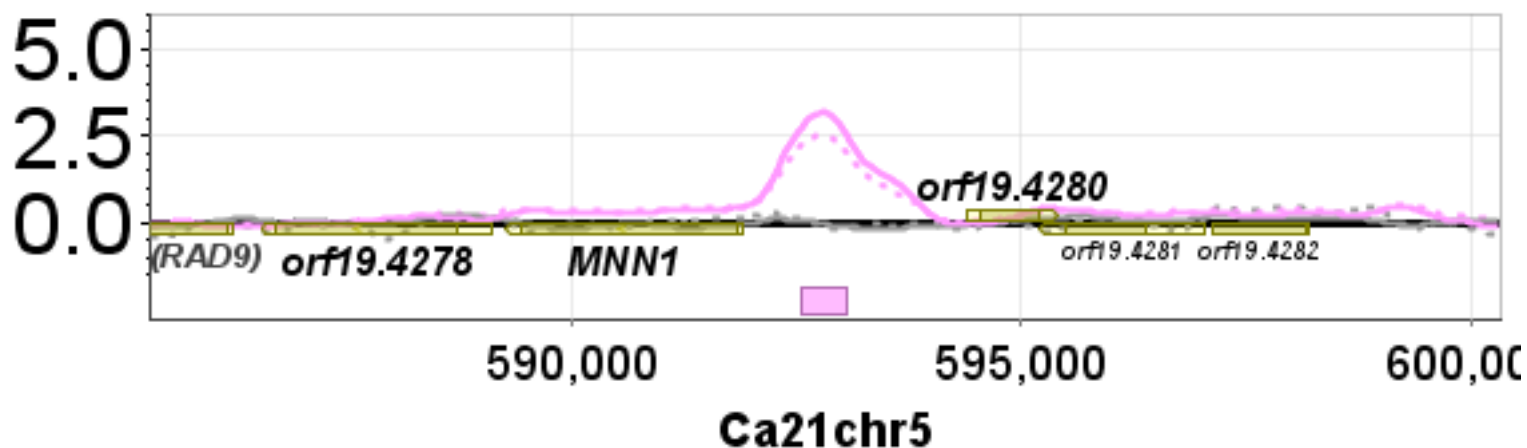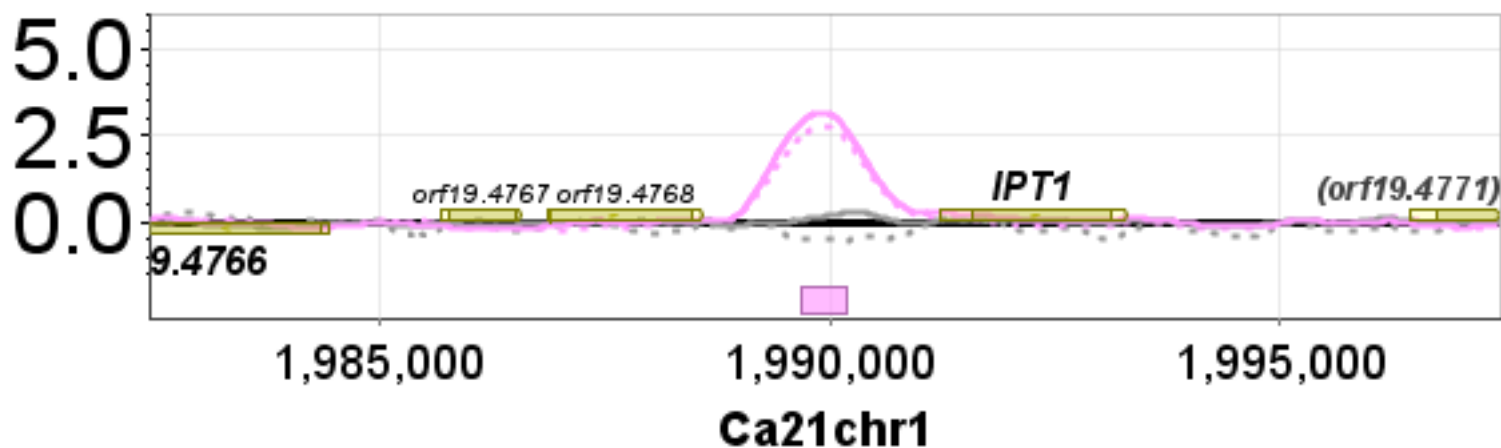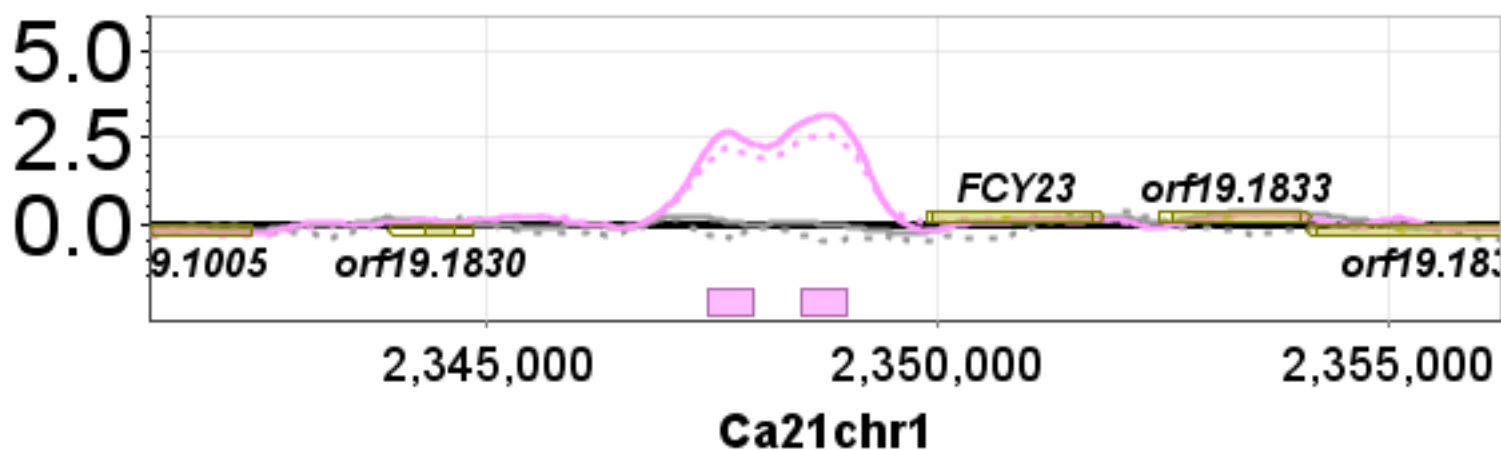

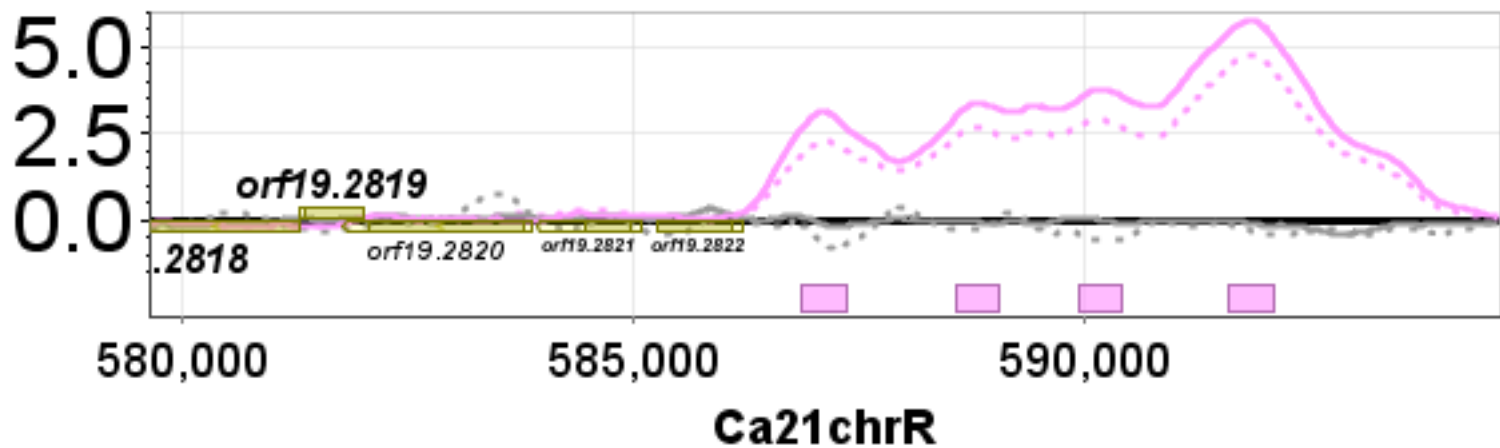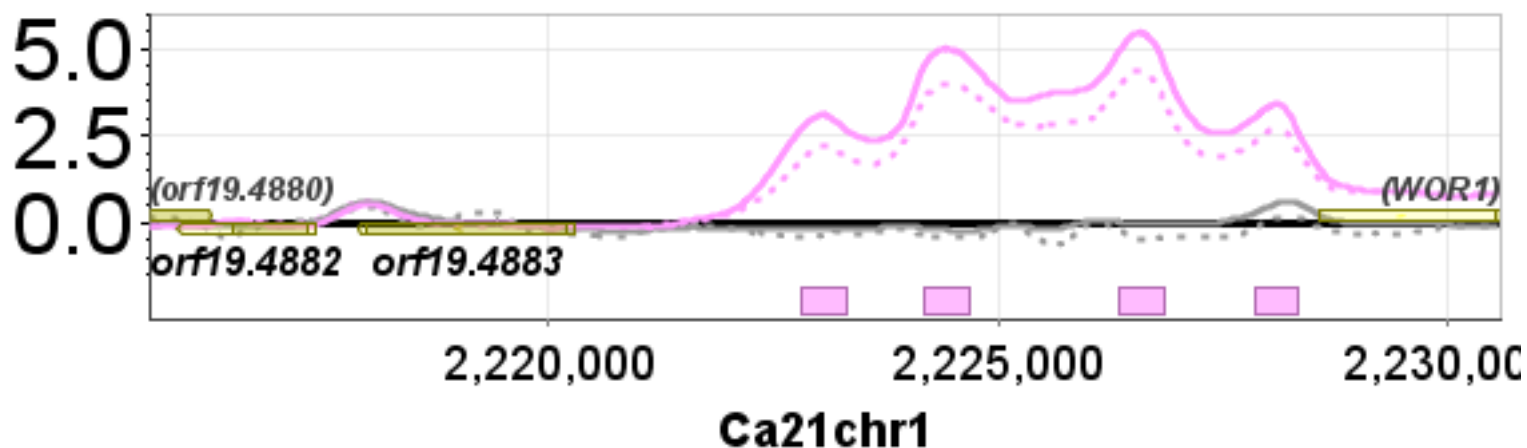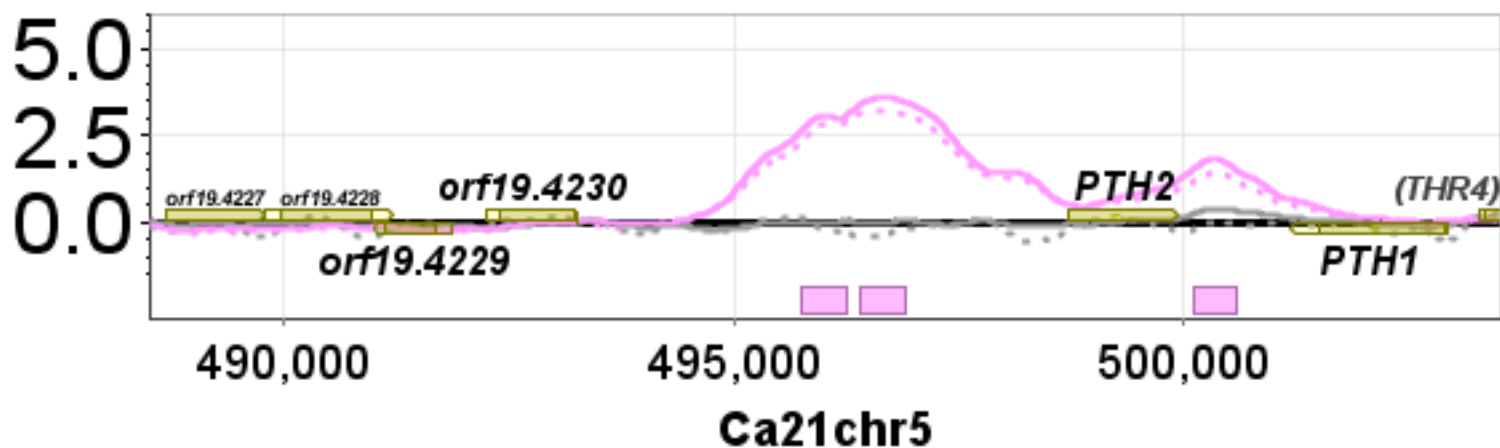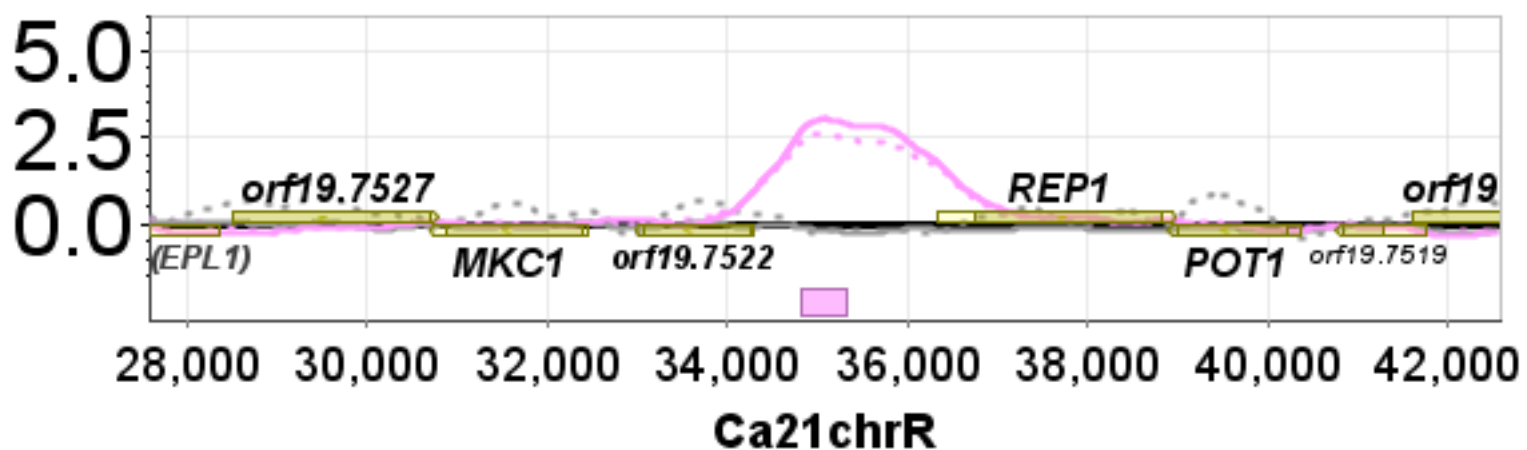



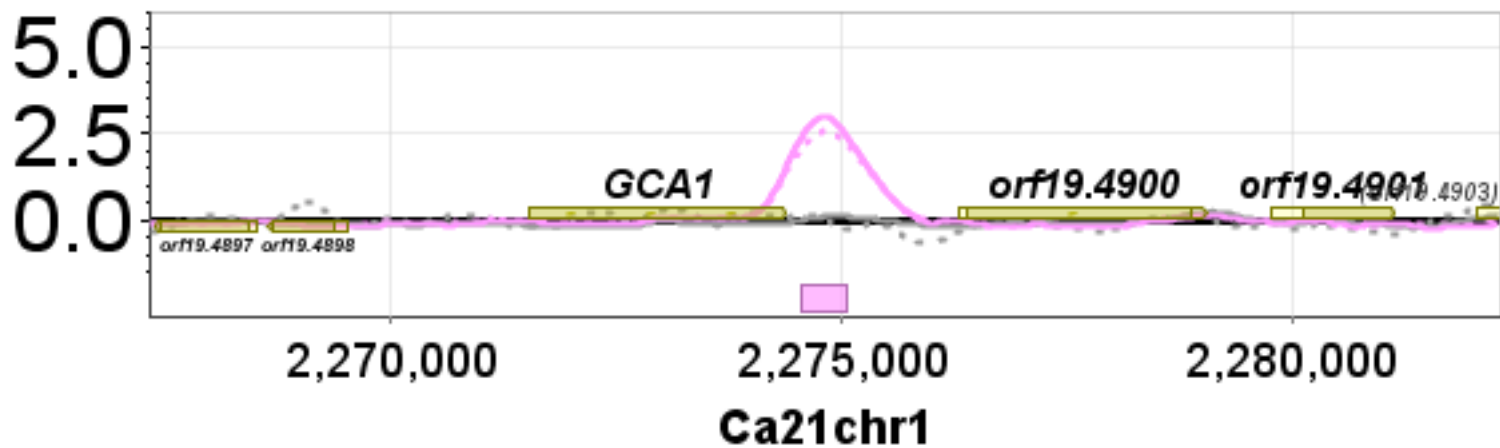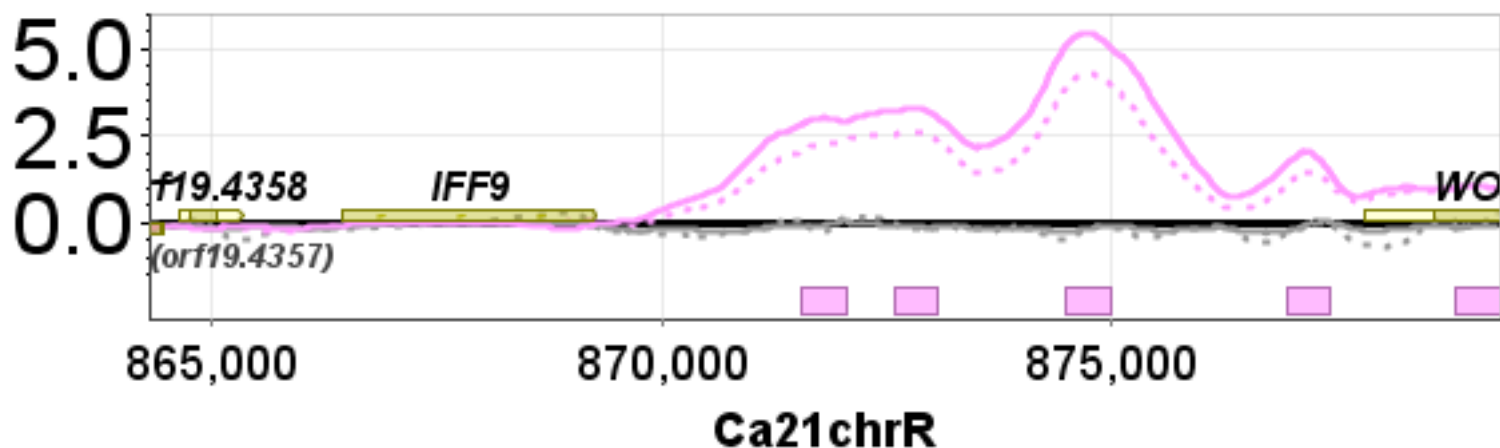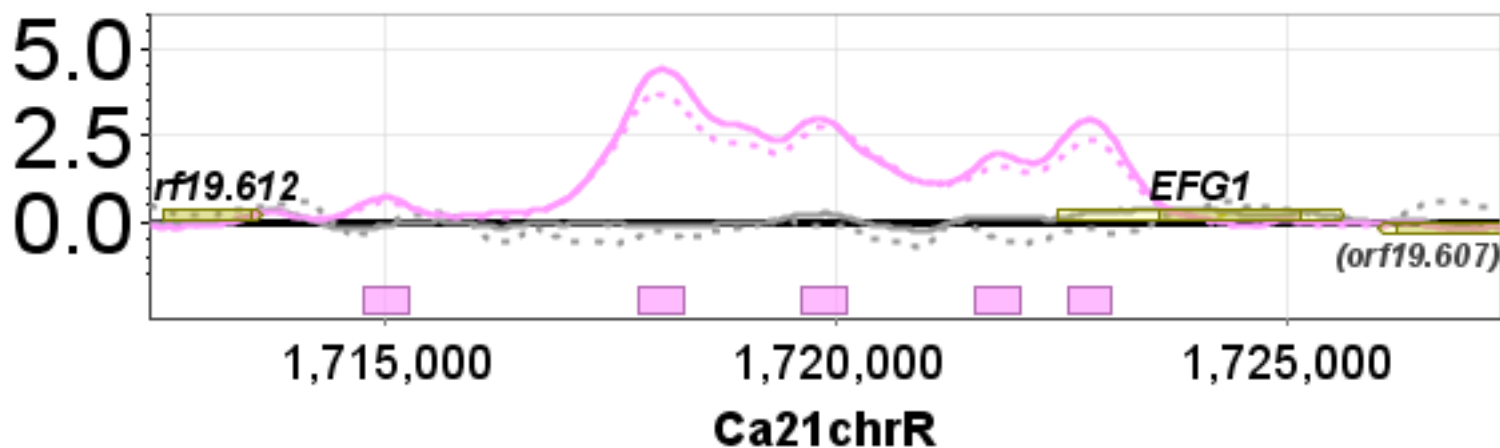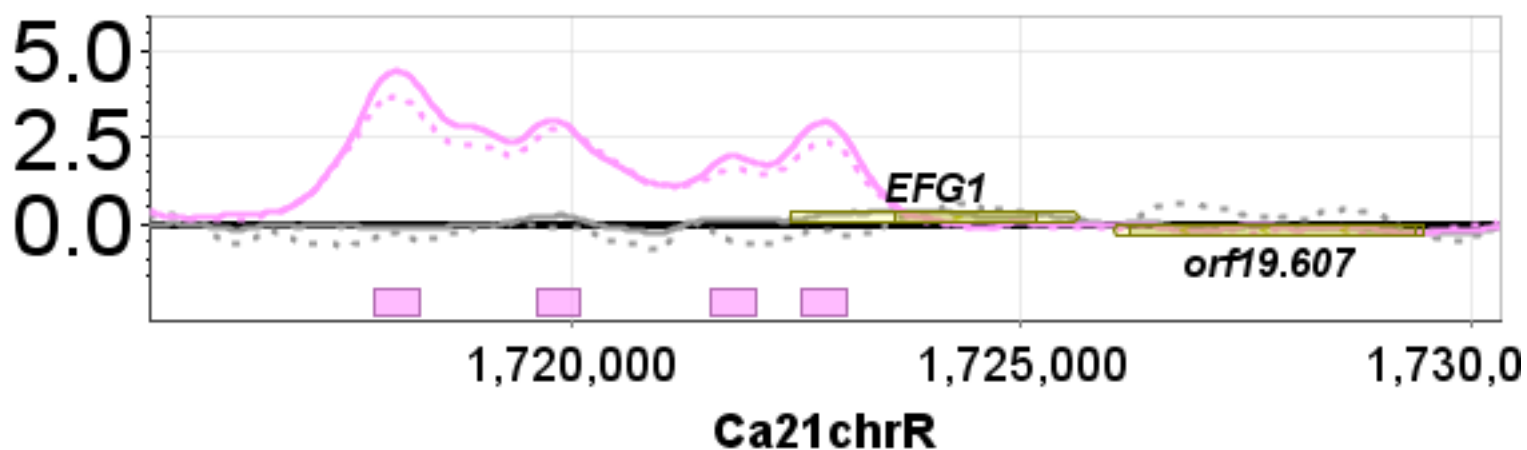

[2.945] Ca21chr5:109624-124623 [+] [orf19.934, orf19.933, AGA1, ntar\_855]

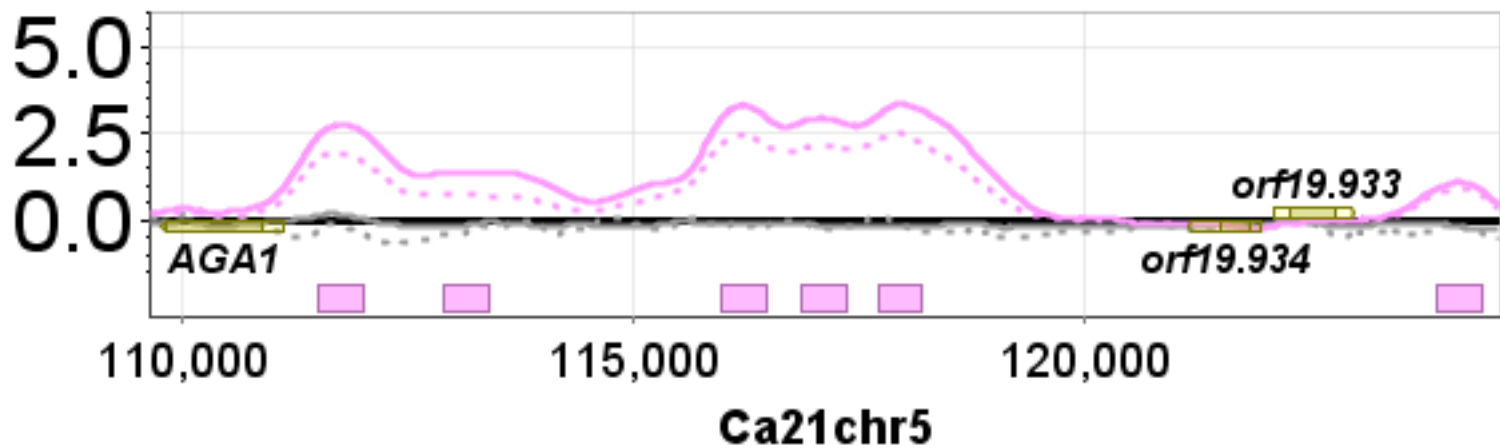

[2.91] Ca21chr1:140018-155017 [+] [ntar\_16, orf19.6027, HGC1, ERG2]

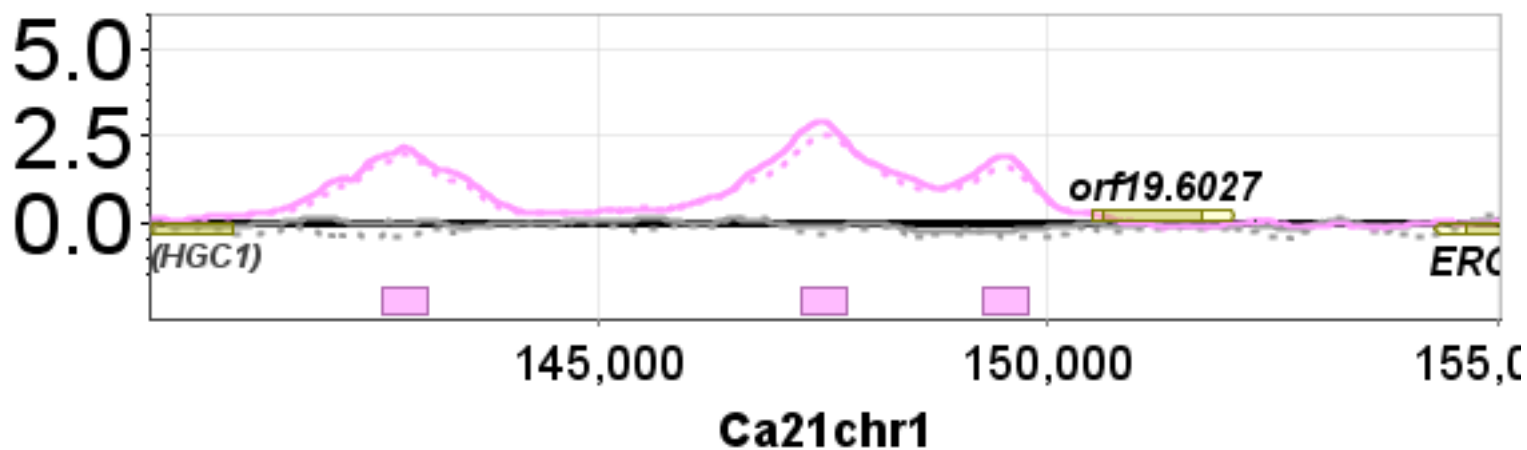

[2.905] Ca21chrR:2076779-2091778 [+] [ntar\_1396.5, ntar\_1397.1, ntar\_1396, ntar\_1398, ntar\_1395]

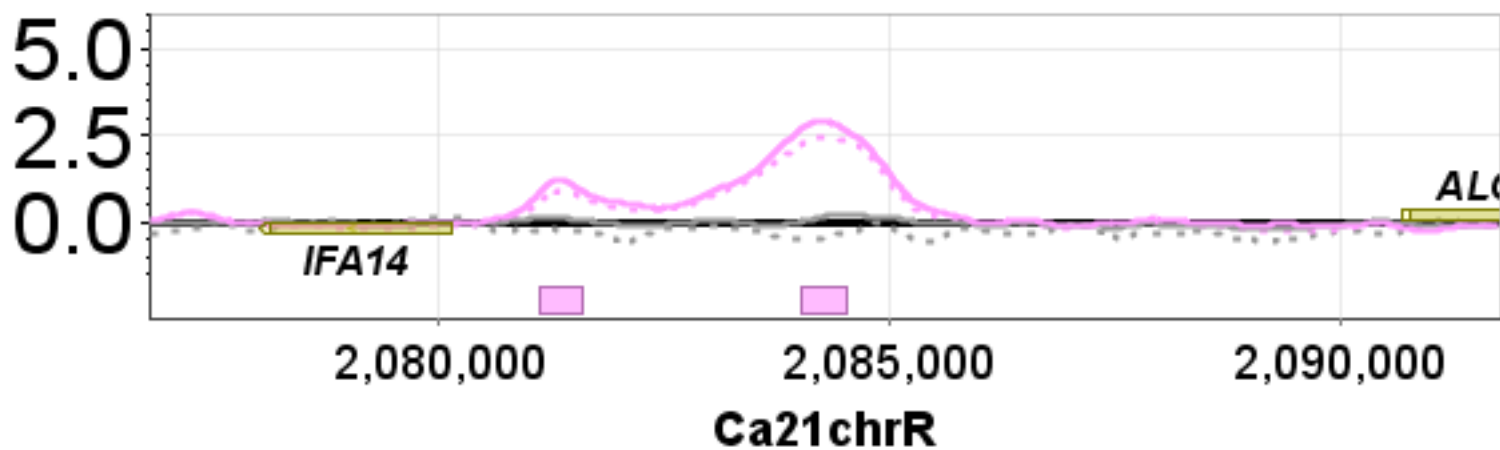

[2.873] Ca21chr1:440617-455616 [+] [ntar\_43, ntar\_42, GAL1, orf19.3671, SHA3]

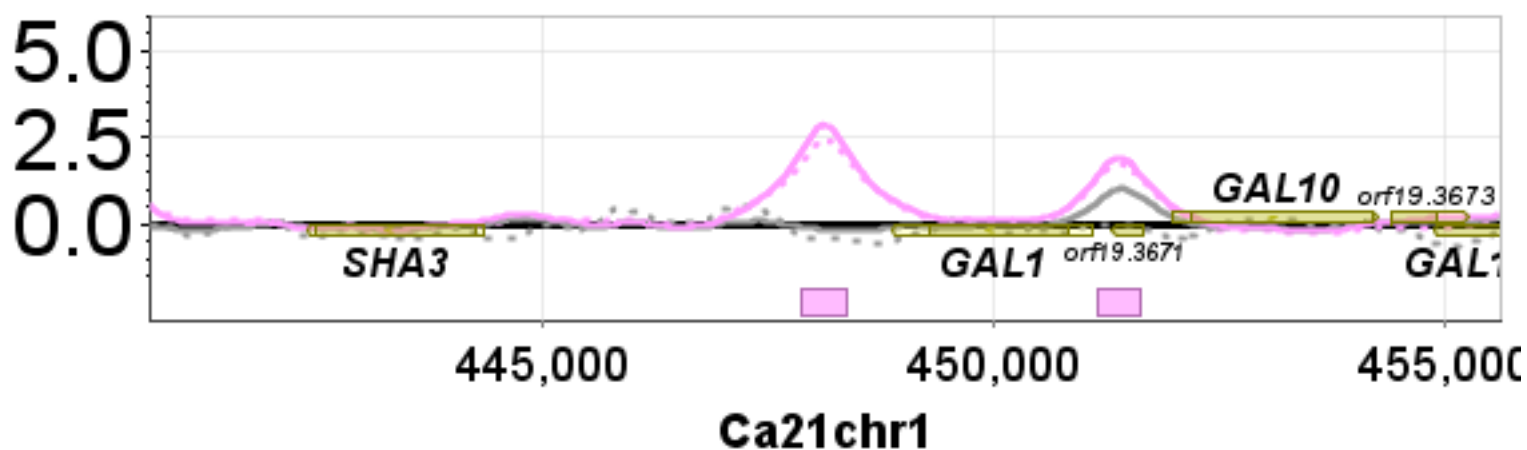

[2.859] Ca21chrR:2103637-2118636 [+] [BET2, DEF1, DPB2, GNP3]

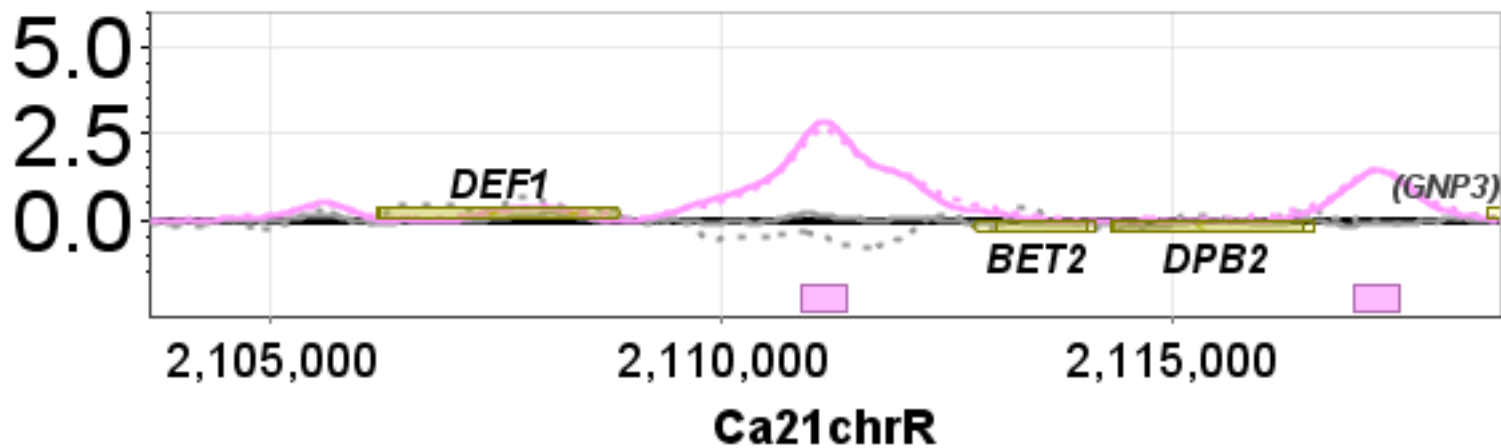

[2.851] Ca21chr2:737523-752522 [+] [orf19.867, ADAEC, RAD32, ntar\_354, orf19.864]

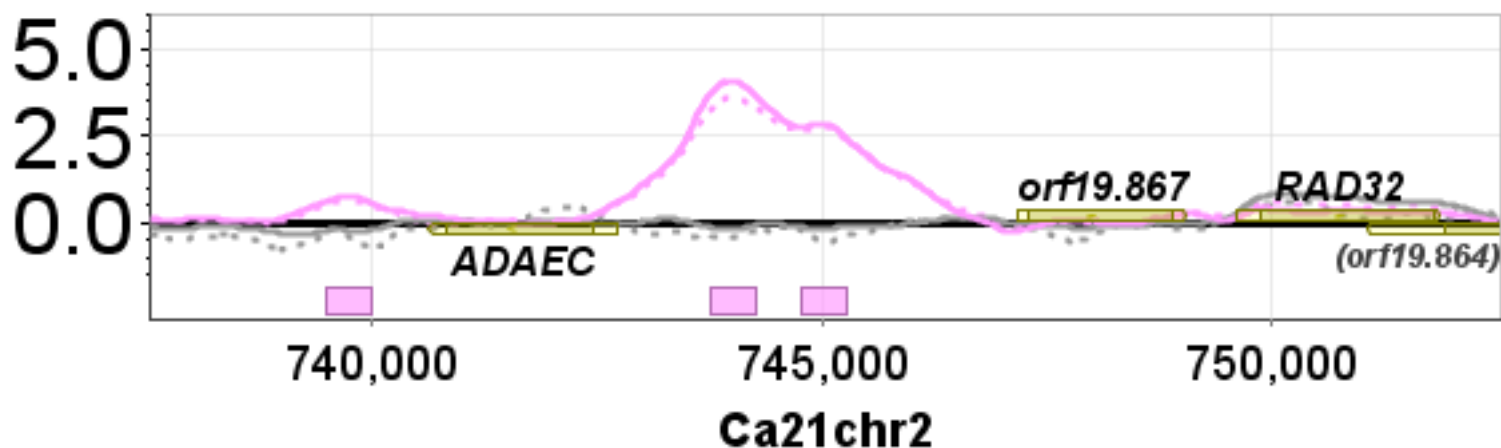

[2.847] Ca21chr1:1074638-1089637 [+] [GAT2, orf19.450, ntar\_104]

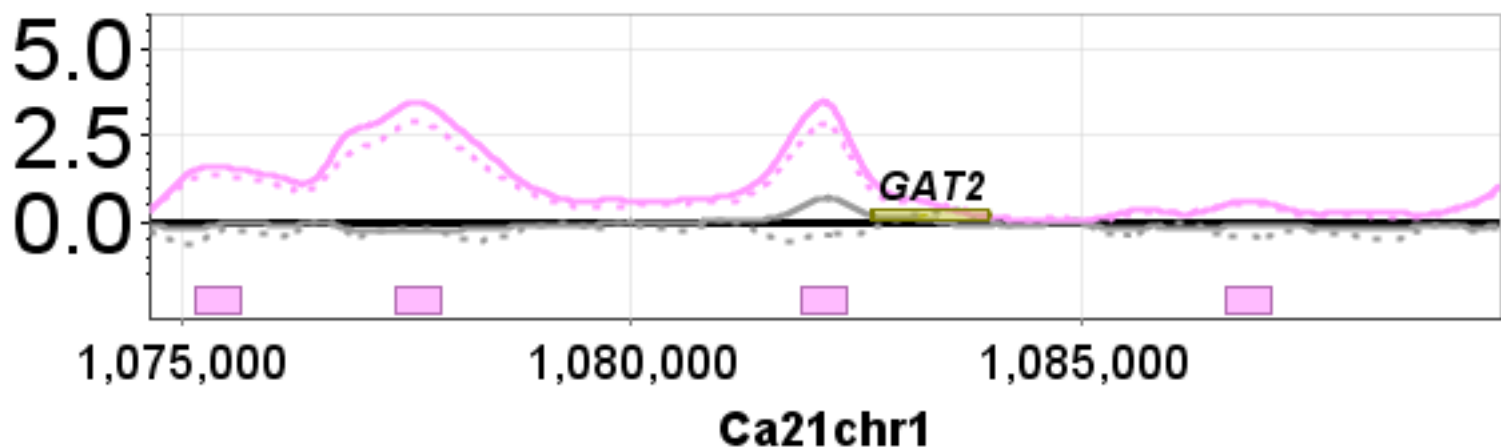

[2.842] Ca21chr1:1082750-1097749 [+] [ntar\_104, orf19.449, orf19.450, orf19.448, ntar\_105]

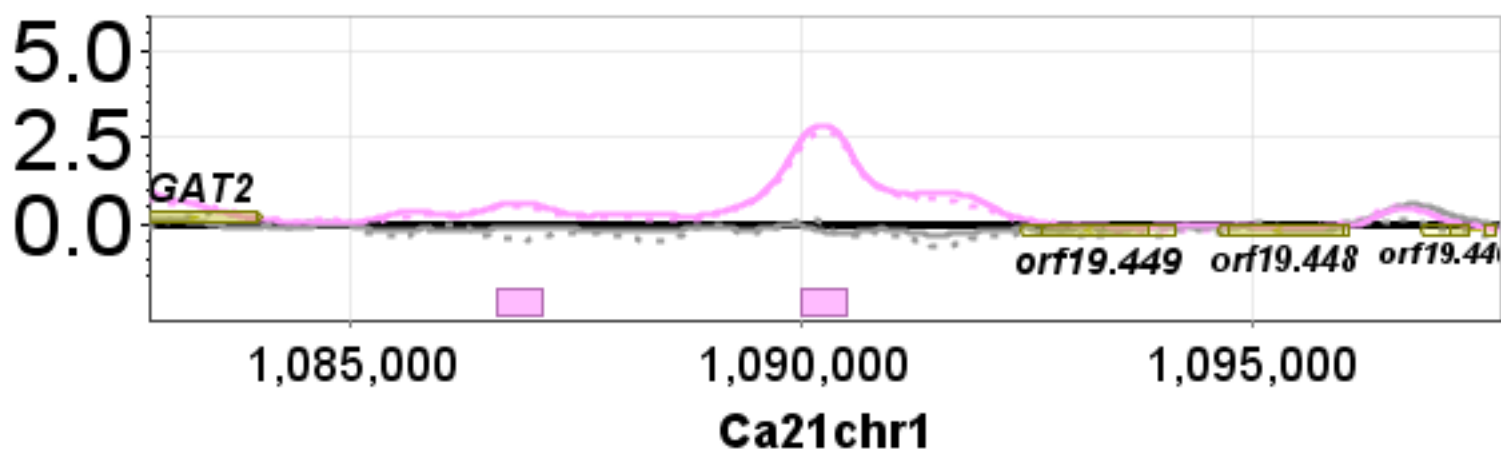

[2.739] Ca21chr5:104249-119248 [+] [AGA1, ntar\_854, orf19.936, orf19.937, orf19.938]

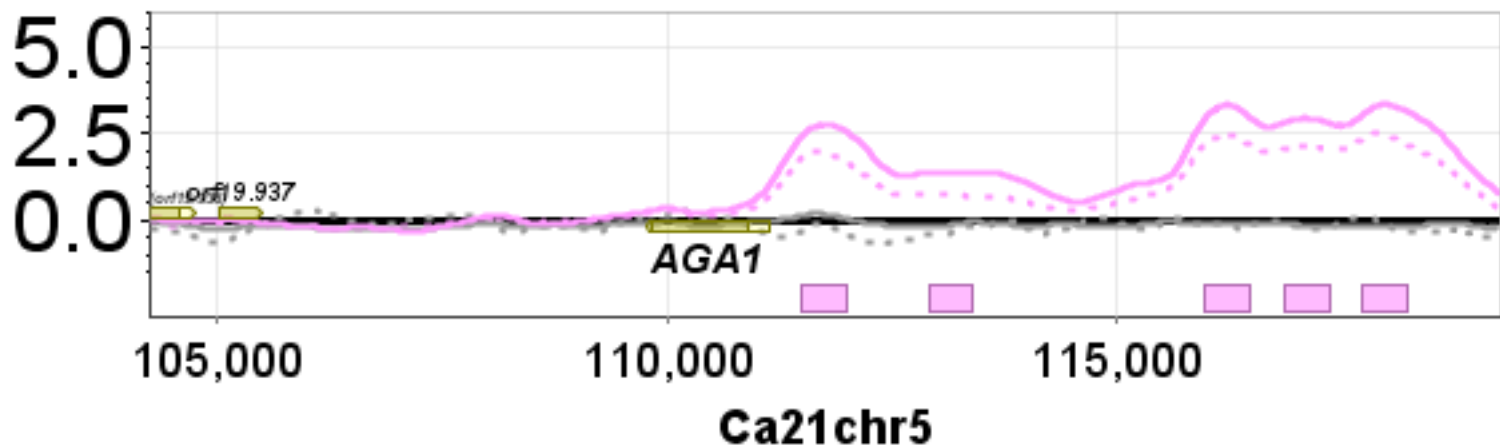

[2.736] Ca21chr1:3102532-3117531 [+] [RBE1, RPL4B, ntar\_278, FTR1, orf19.7216]

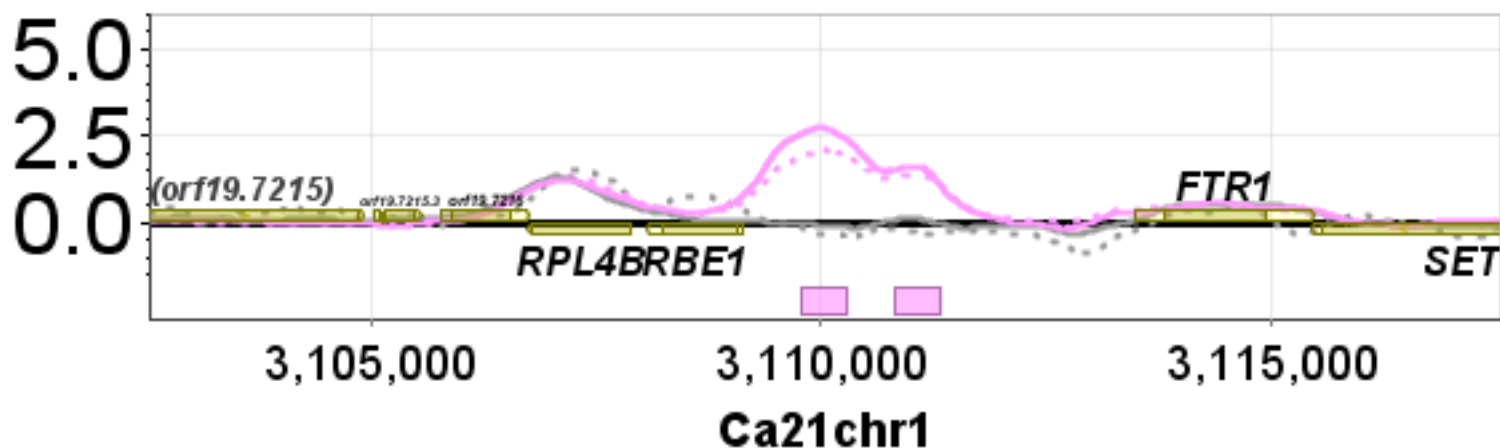

[2.71] Ca21chr5:888026-903025 [+] [orf19.1286, ntar\_940, orf19.1285, orf19.1287, ntar\_939]

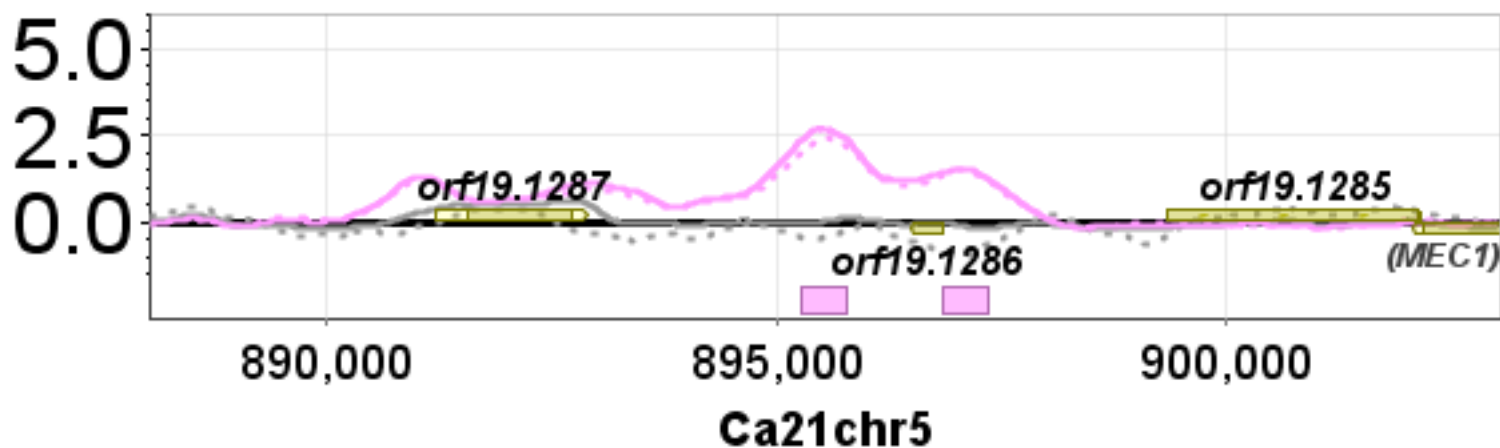

[2.695] Ca21chr1:2220593-2235592 [+] [WOR1, ntar\_207]

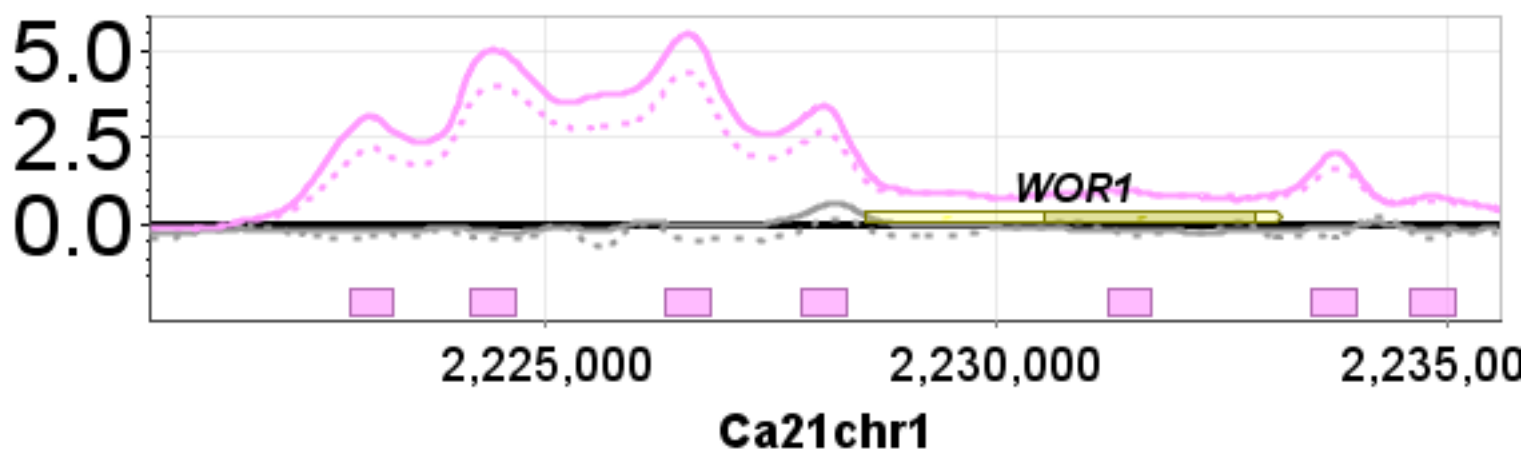

[2.674] Ca21chr2:725360-740359 [+] [ntar\_353, orf19.871, orf19.872, ntar\_354]

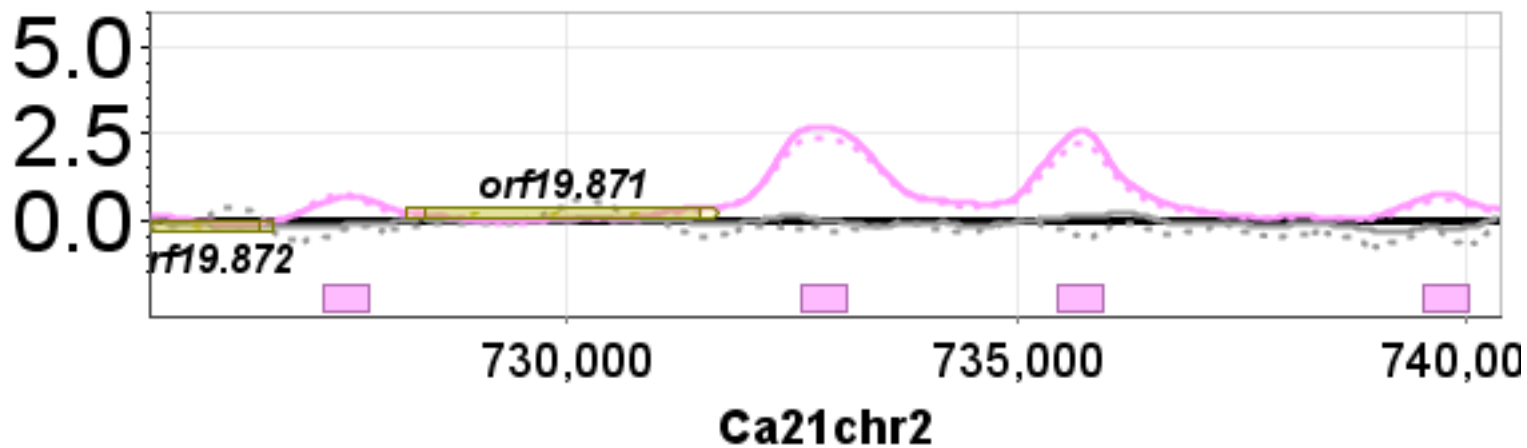

[2.672] Ca21chr3:1108822-1123821 [+] [WOR2, ntar\_614, ntar\_615, ntar\_616, ntar\_617]

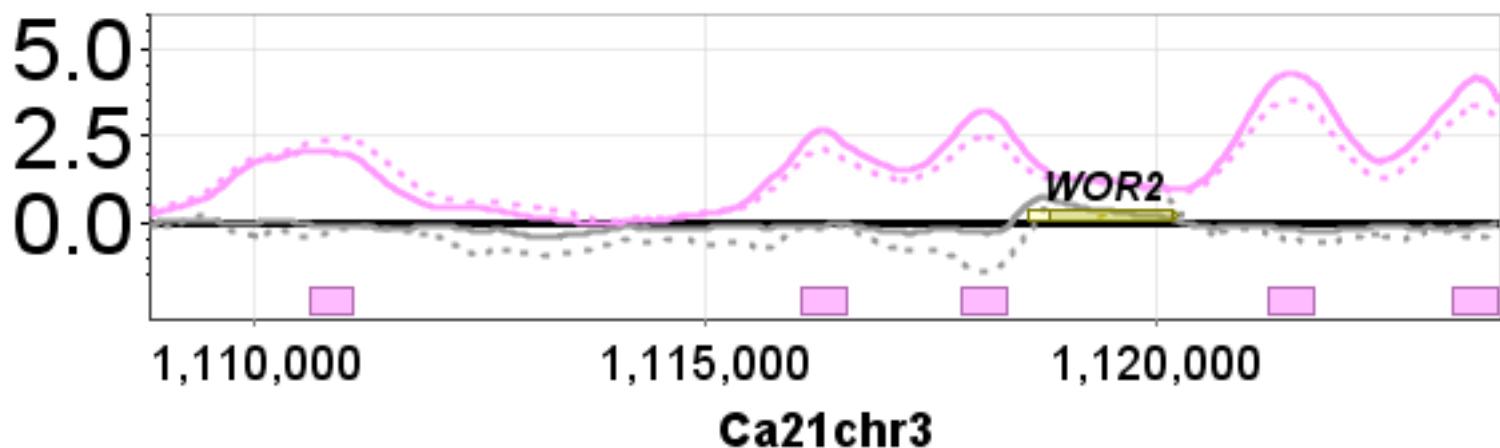

[2.664] Ca21chr1:2340211-2355210 [+] [ntar\_222, ntar\_221, orf19.1831, FCY23, ntar\_220]

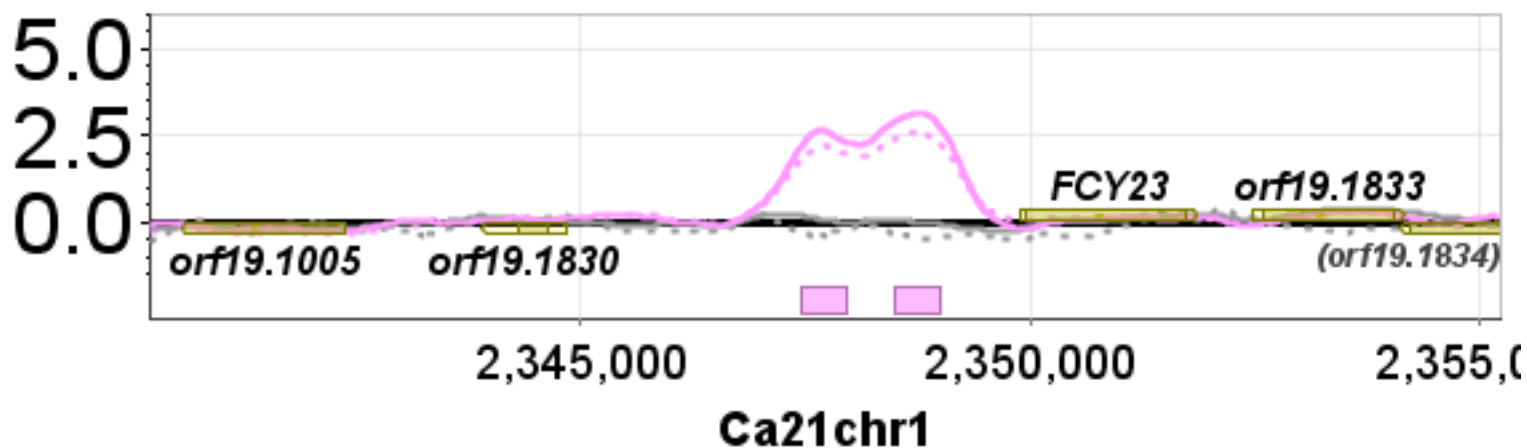

[2.664] Ca21chr4:1515762-1530761 [+] [CZF1, orf19.3128, CCT6, orf19.3125, orf19.3129]

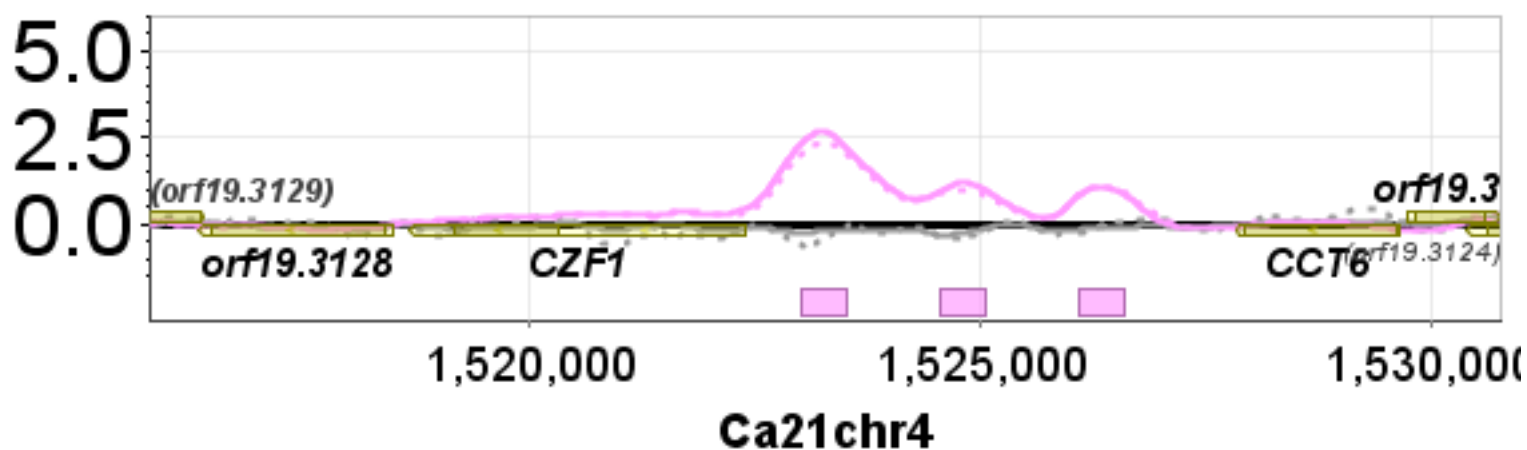

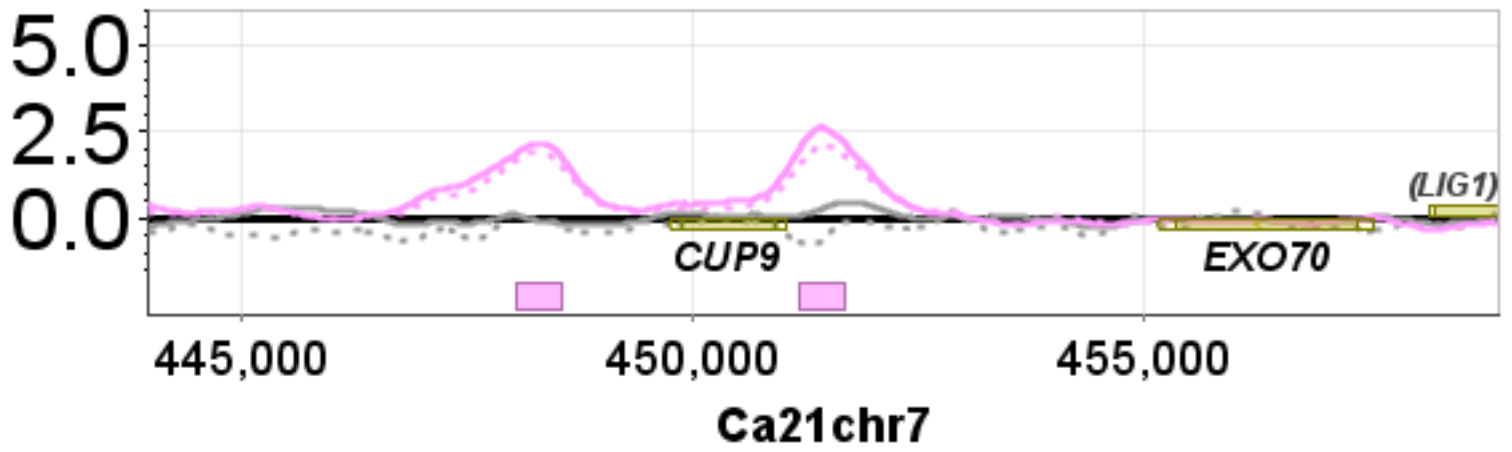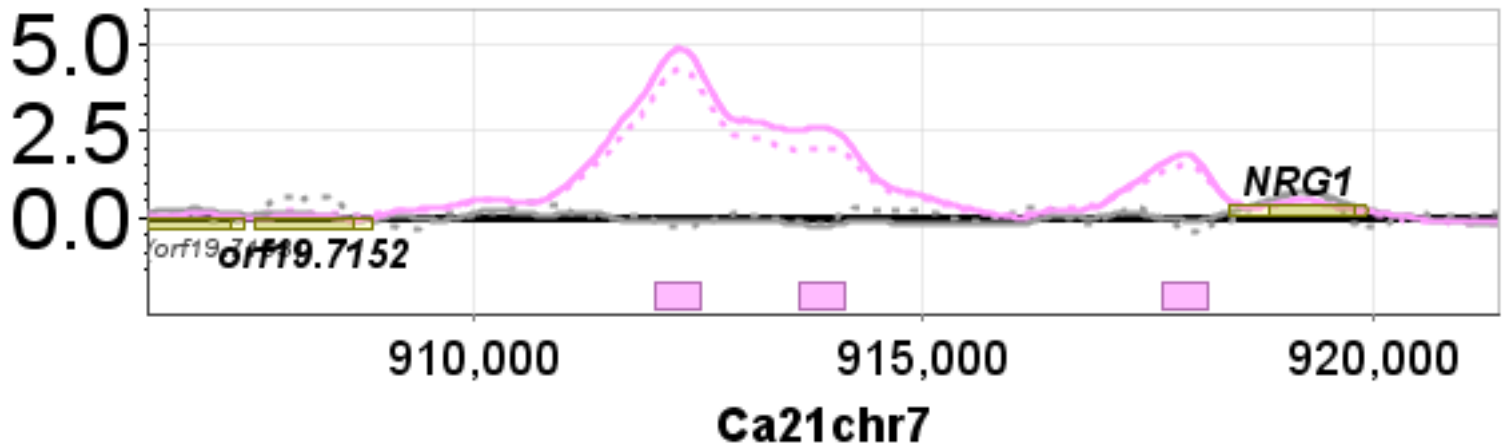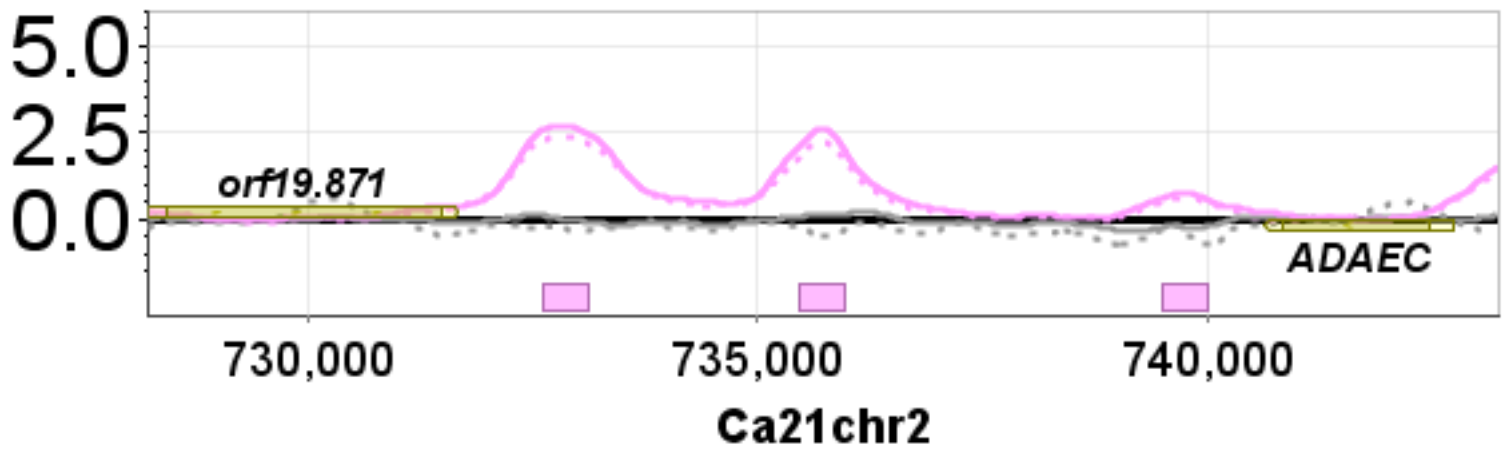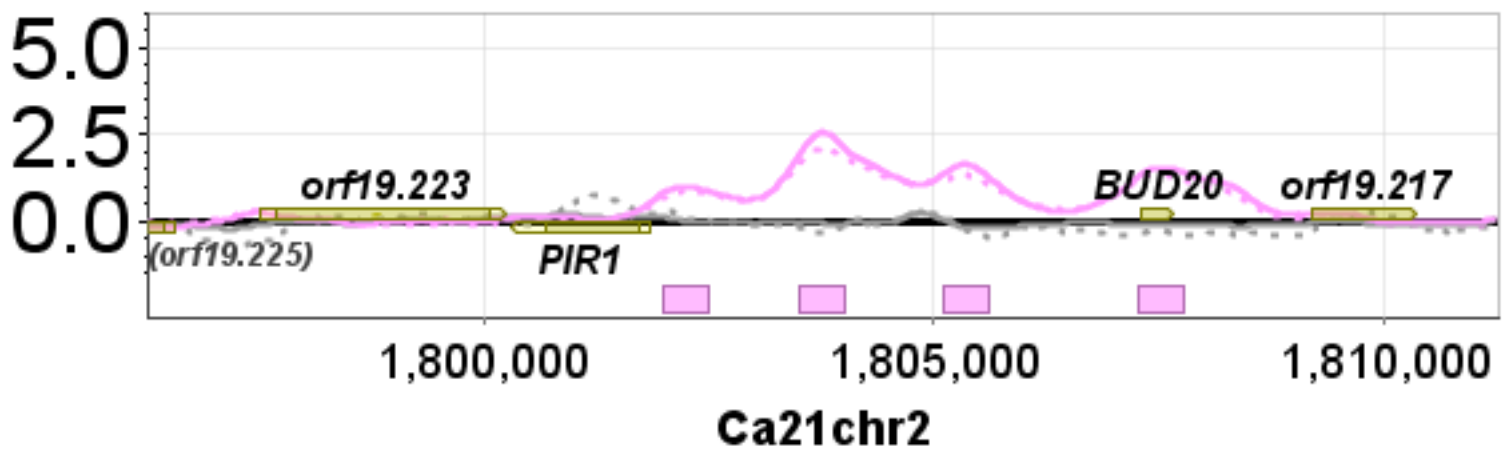

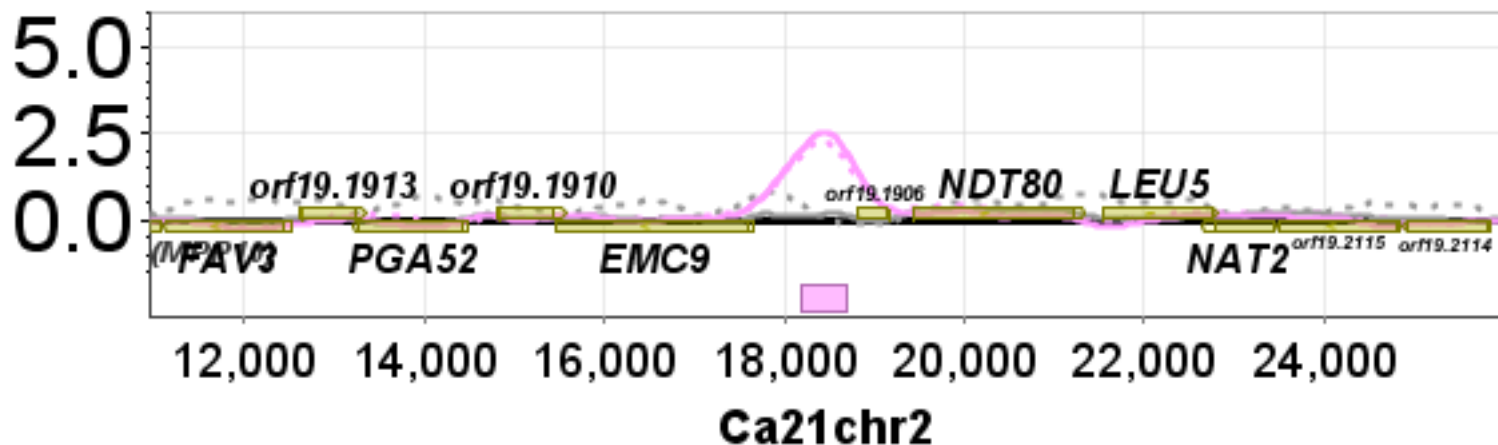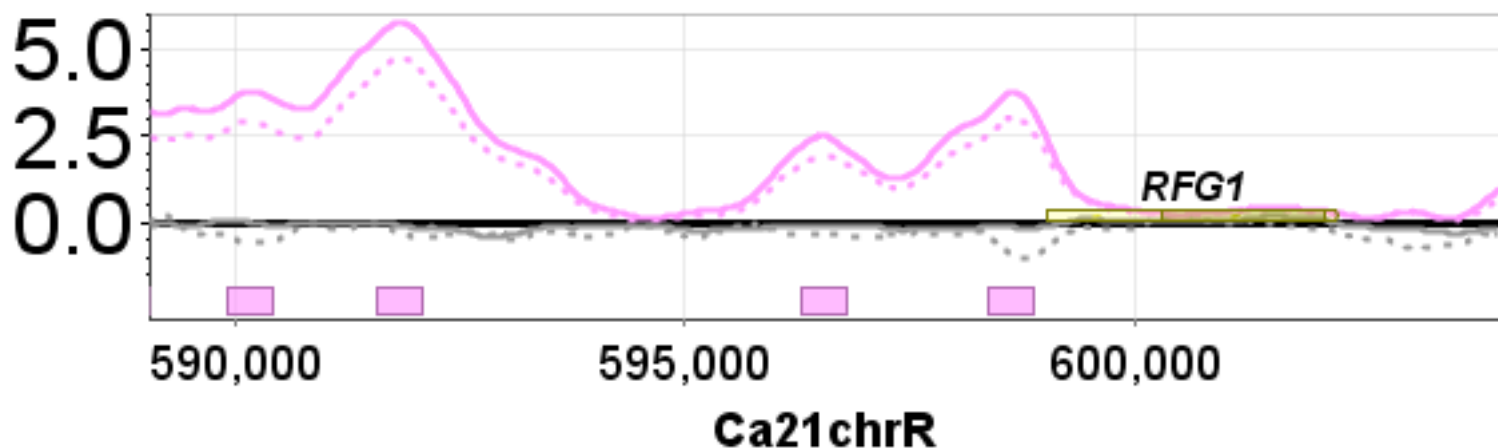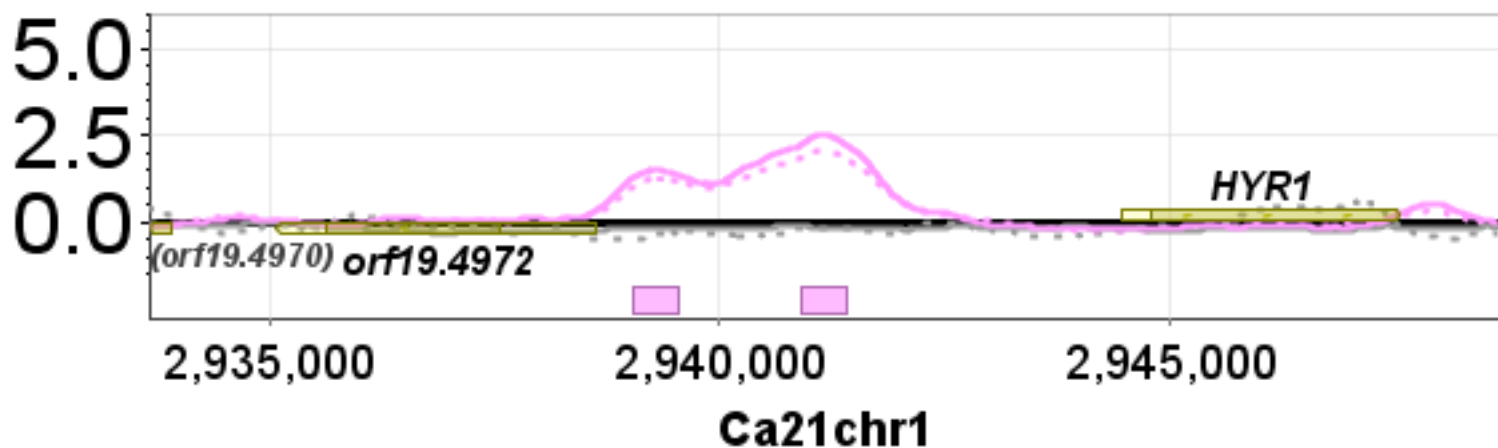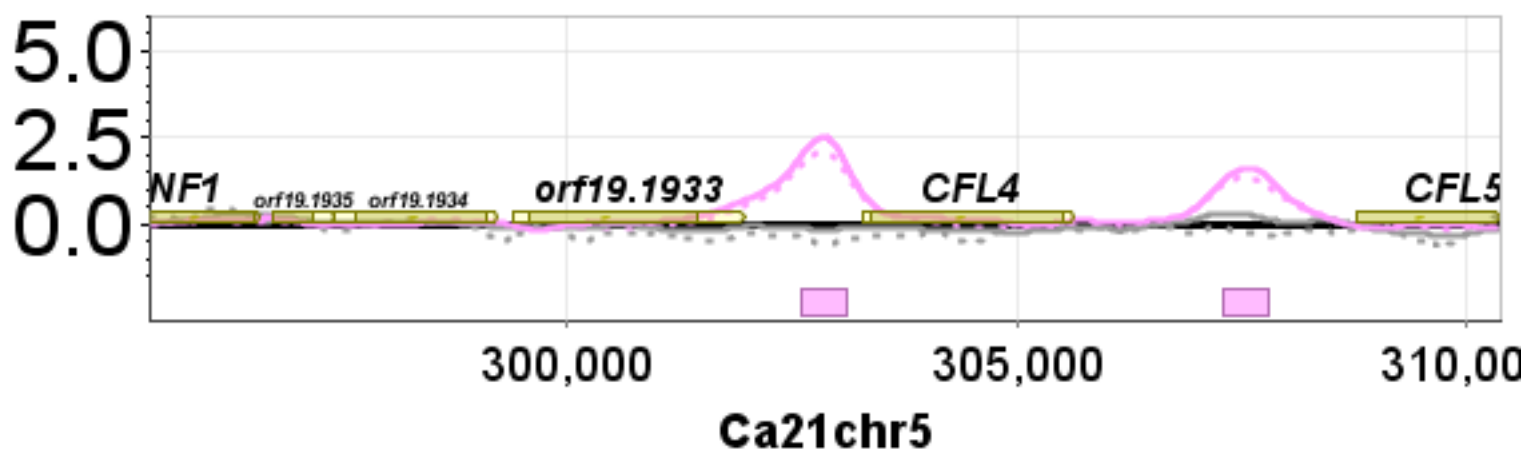

[2.489] Ca21chr1:1322397-1337396 [+] [ntar\_127, orf19.1821]

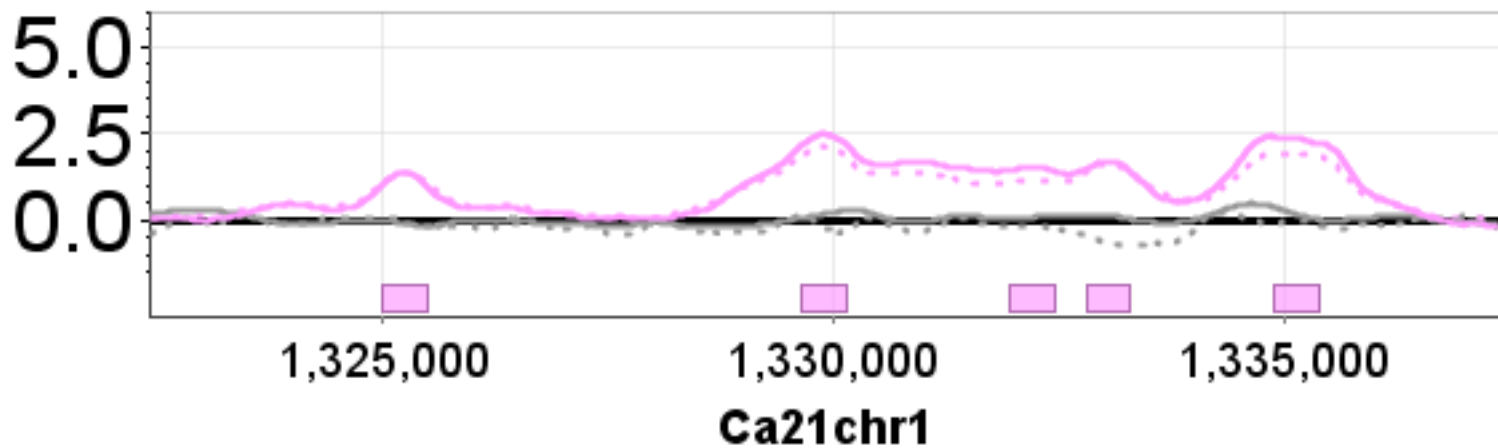

[2.488] Ca21chr5:648003-663002 [+] [orf19.4321, ntar\_909, orf19.4320, ntar\_908, DAP2]

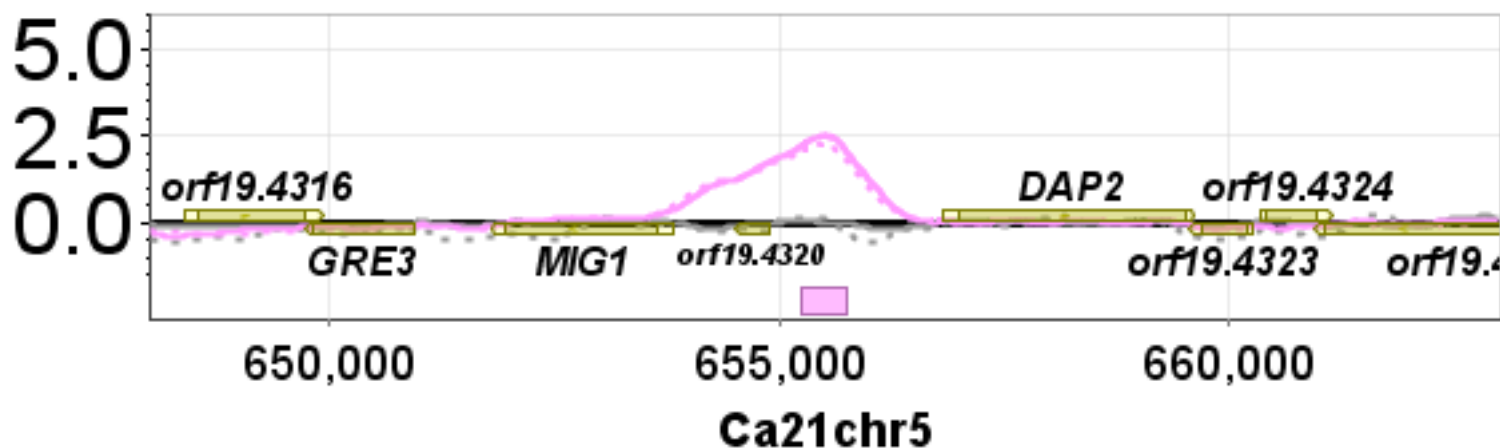

[2.479] Ca21chr1:286655-301654 [+] [orf19.3336, orf19.3335, ntar\_28, RPS21, orf19.3337]

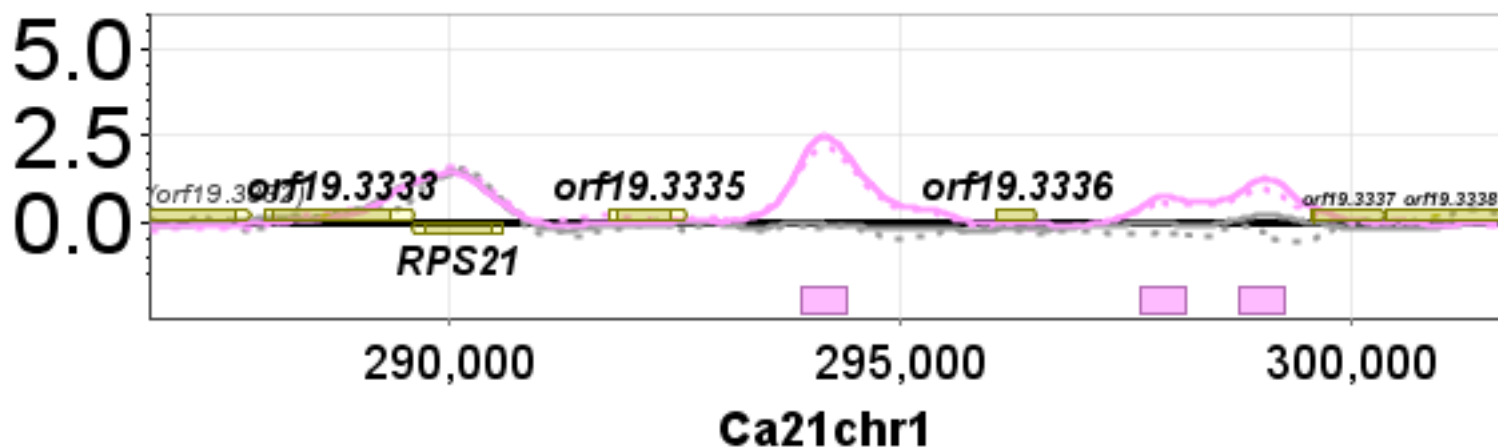

[2.433] Ca21chr3:1103354-1118353 [+] [ntar\_613, orf19.5991, orf19.5989]

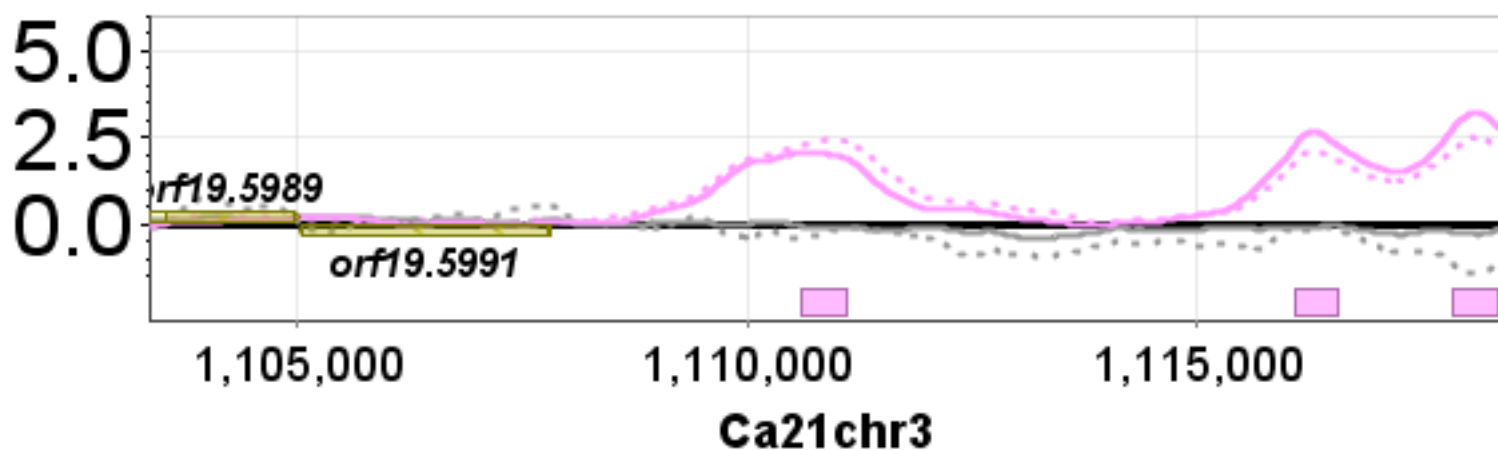



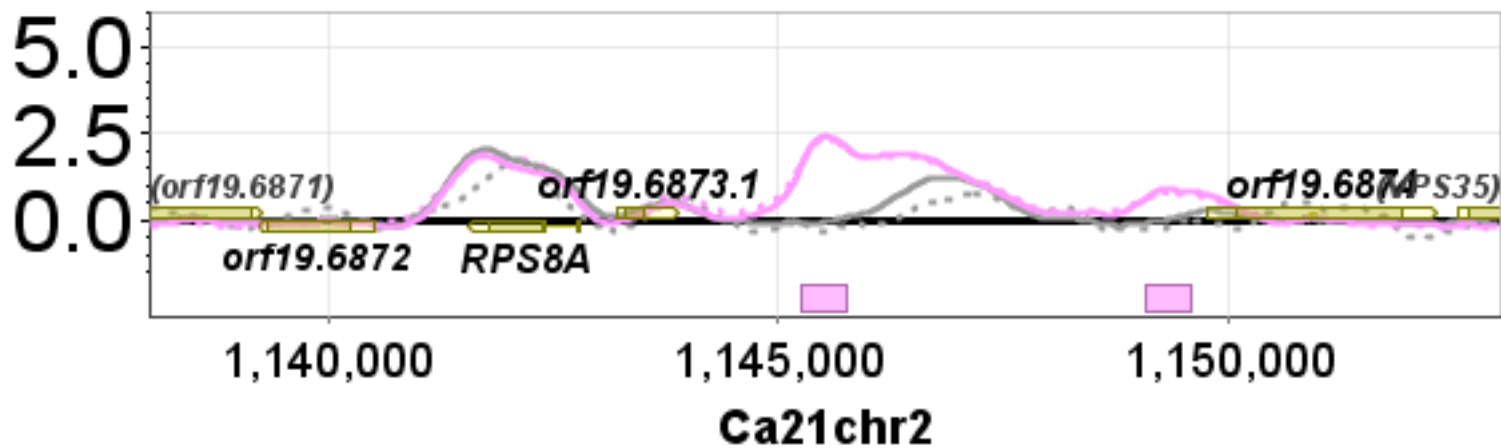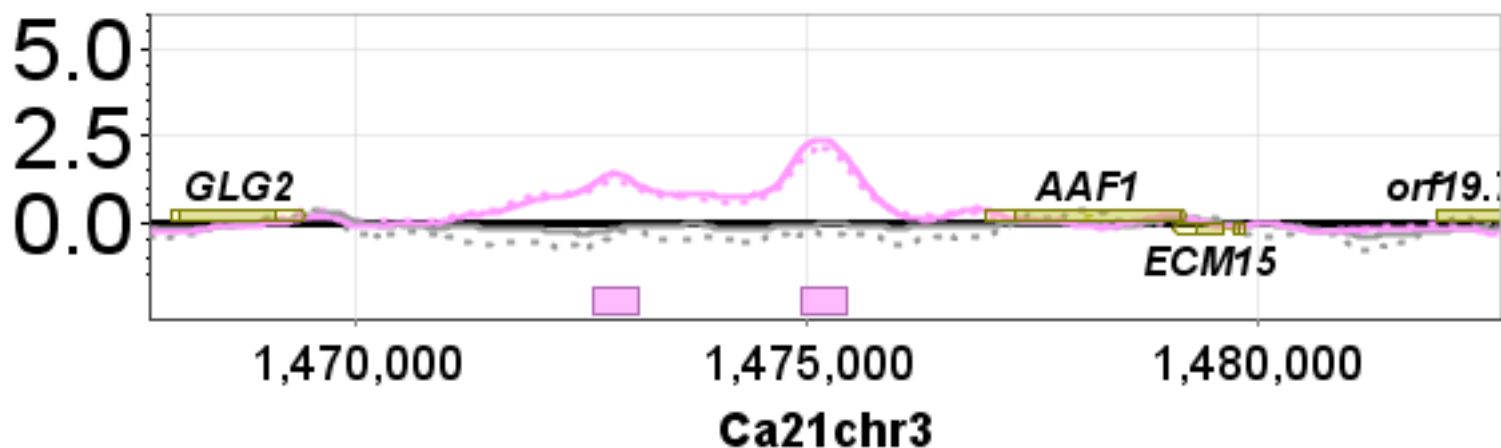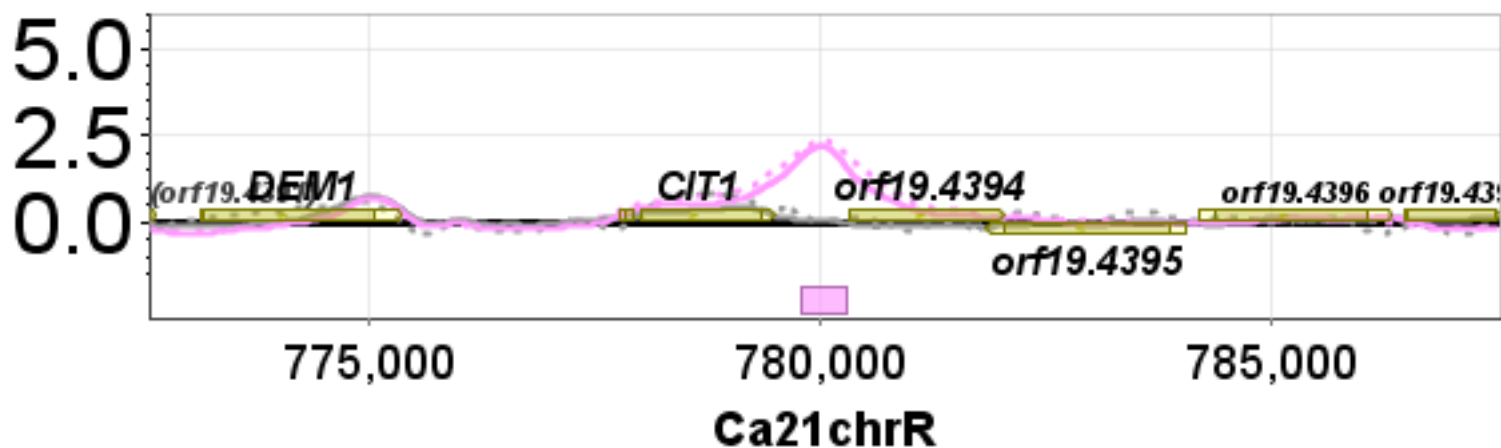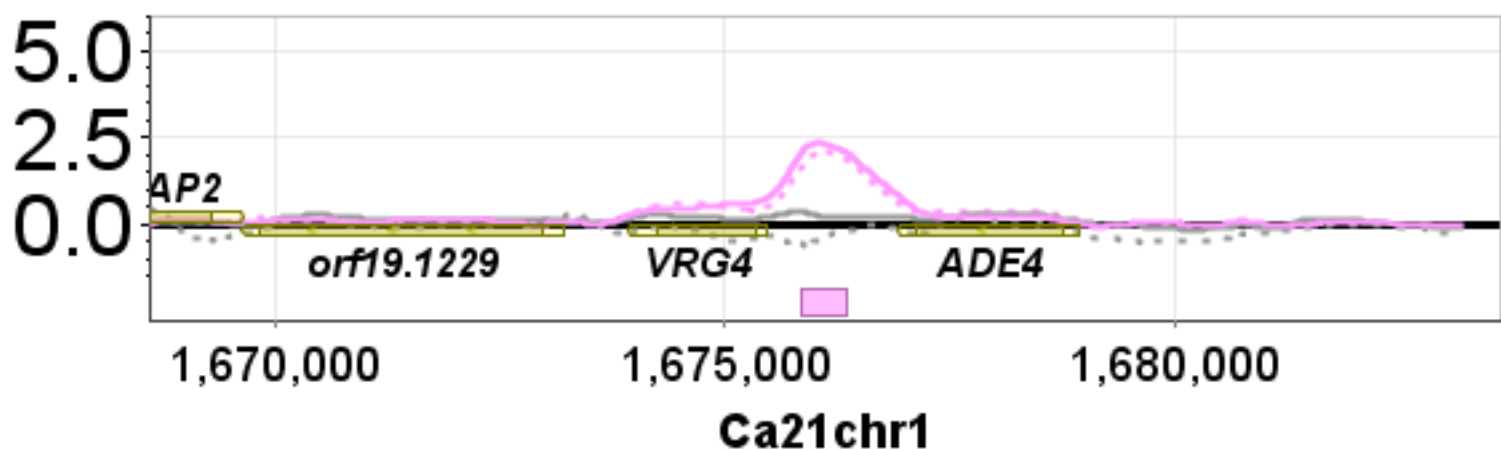

[2.314] Ca21chr5:916966-931965 [+] [orf19.3897, ntar\_941, CHT2, orf19.3898, SDC1]

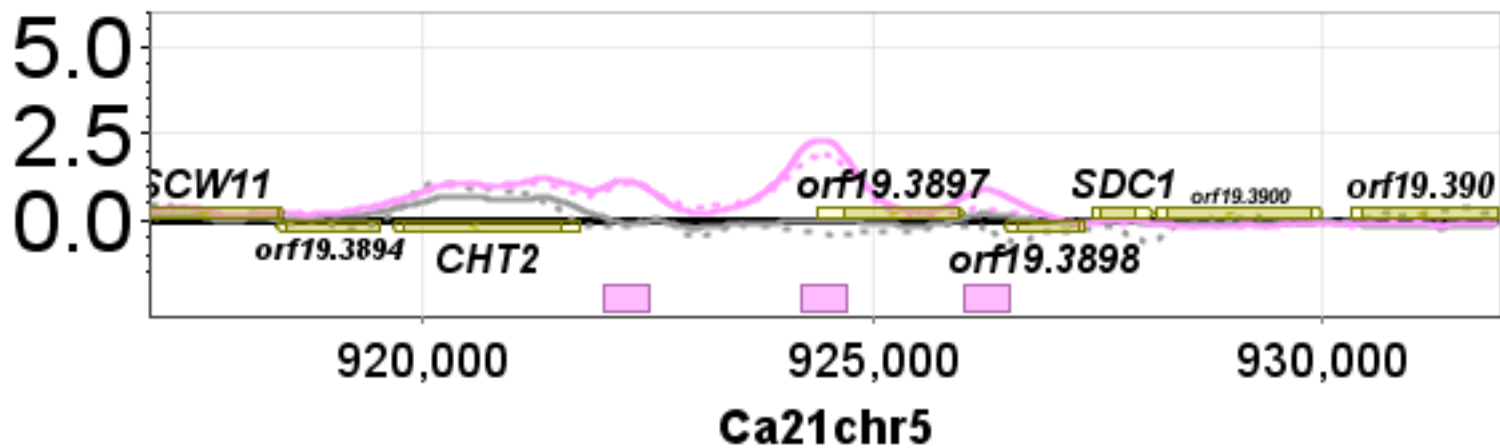

[2.311] Ca21chr3:995516-1010515 [+] [orf19.5933, orf19.5934, orf19.5932, orf19.5935, orf19.5931]

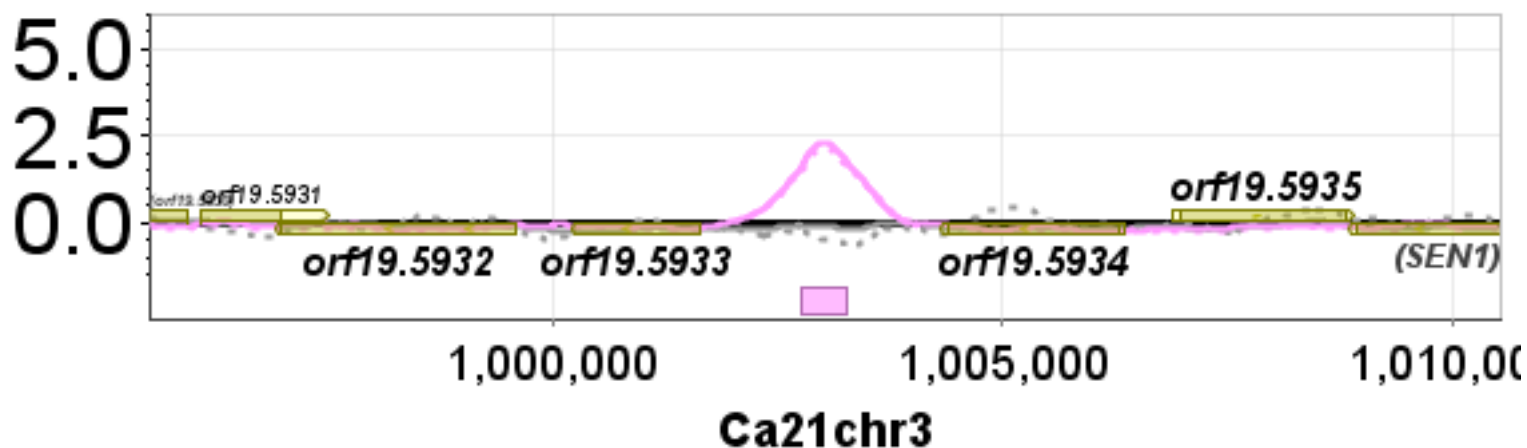

[2.309] Ca21chr7:357506-372505 [+] [orf19.6556, ntar\_1094, ntar\_1093, orf19.6555, orf19.6554]

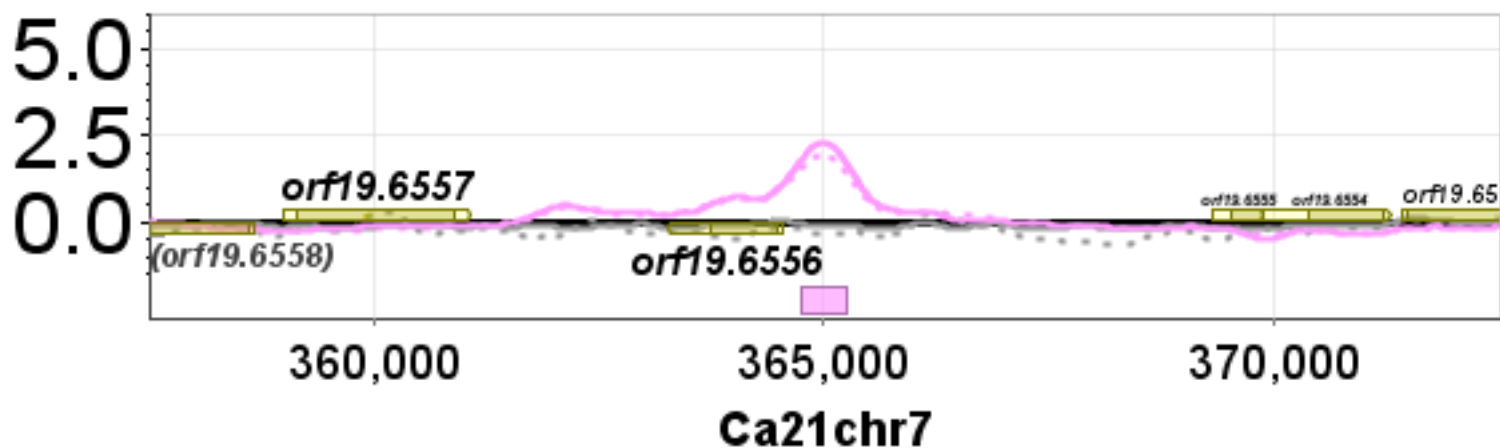

[2.257] Ca21chr4:856492-871491 [+] [JEN2, orf19.5308, orf19.5306, RHD3, orf19.5304]

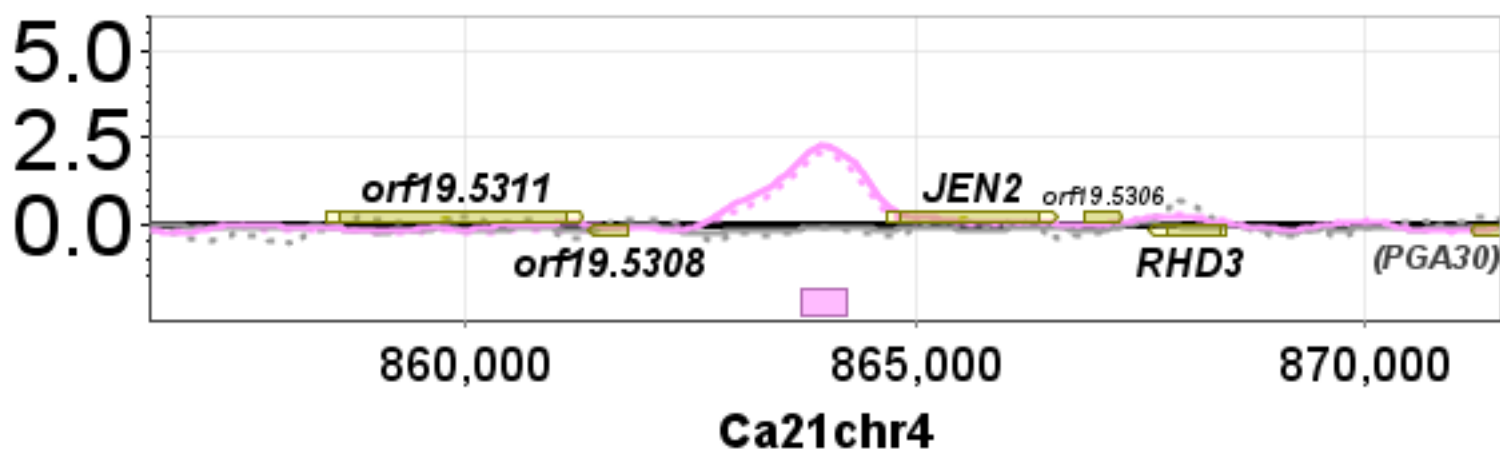

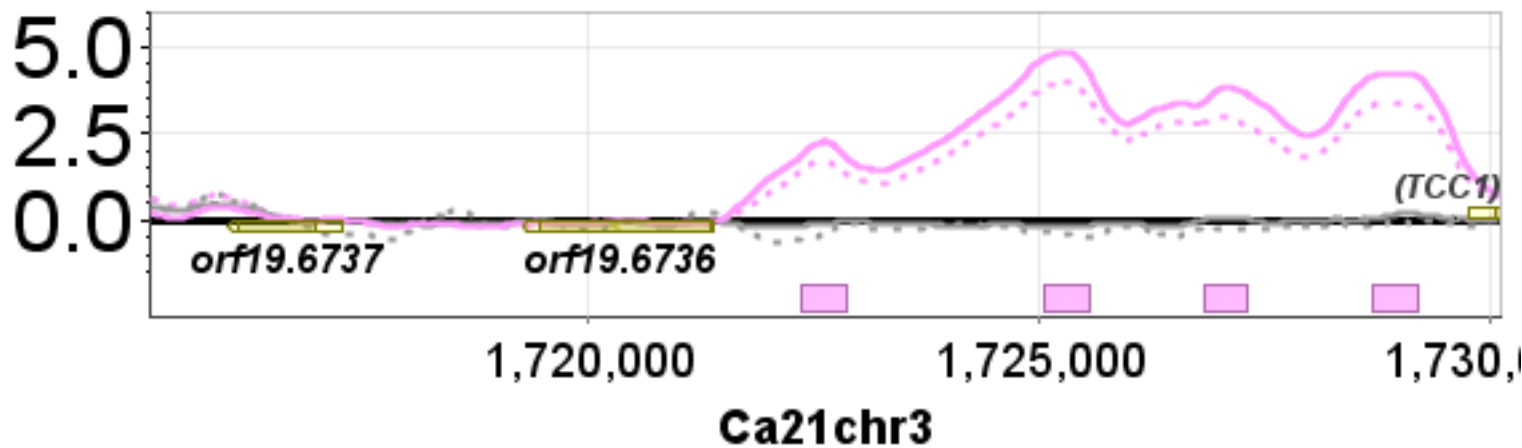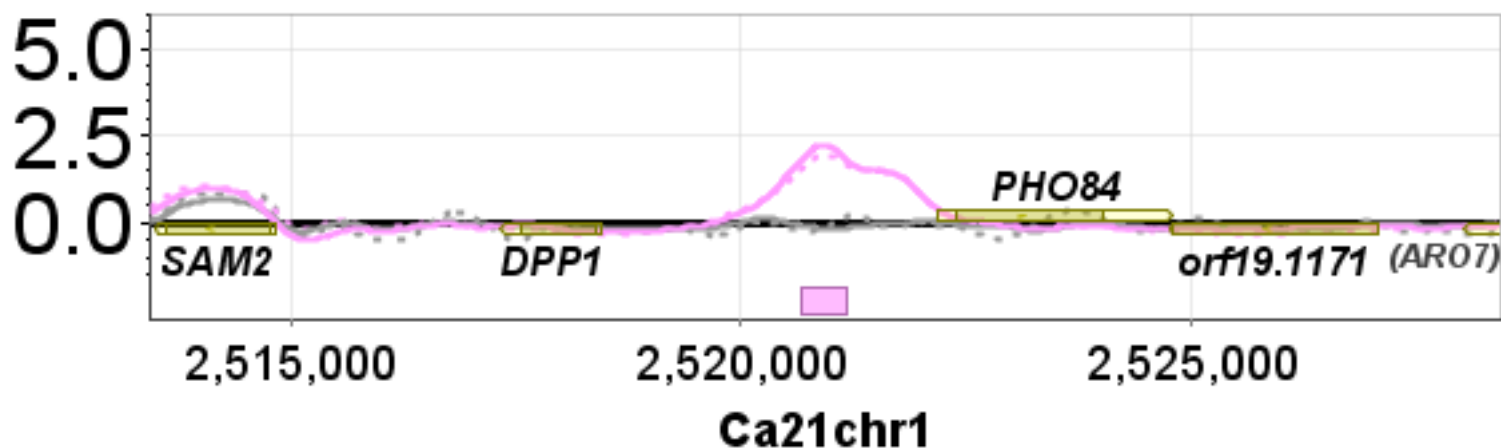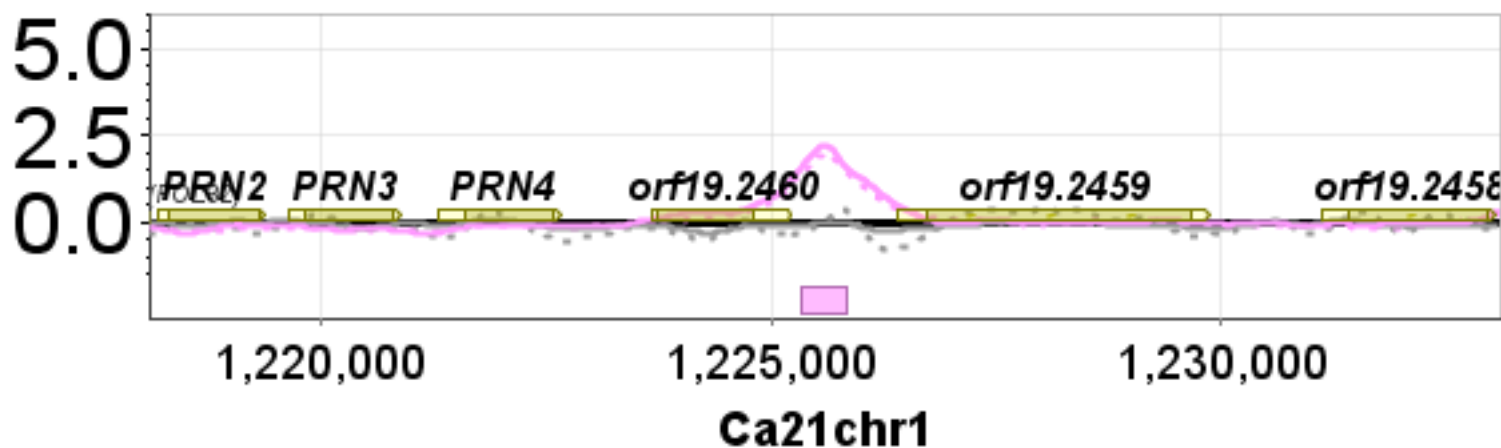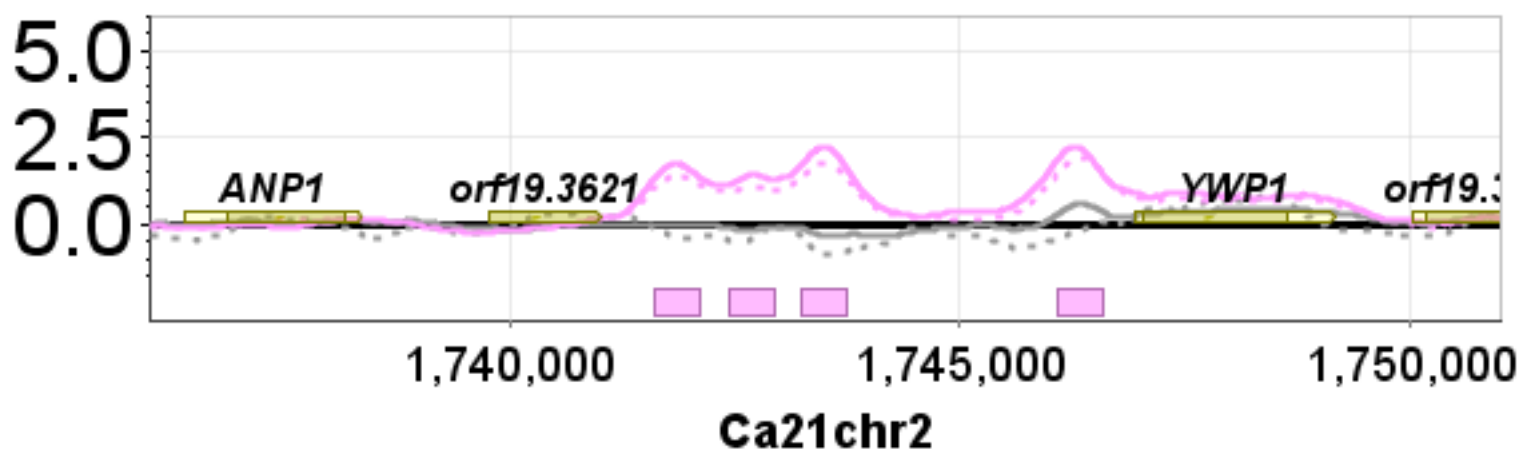

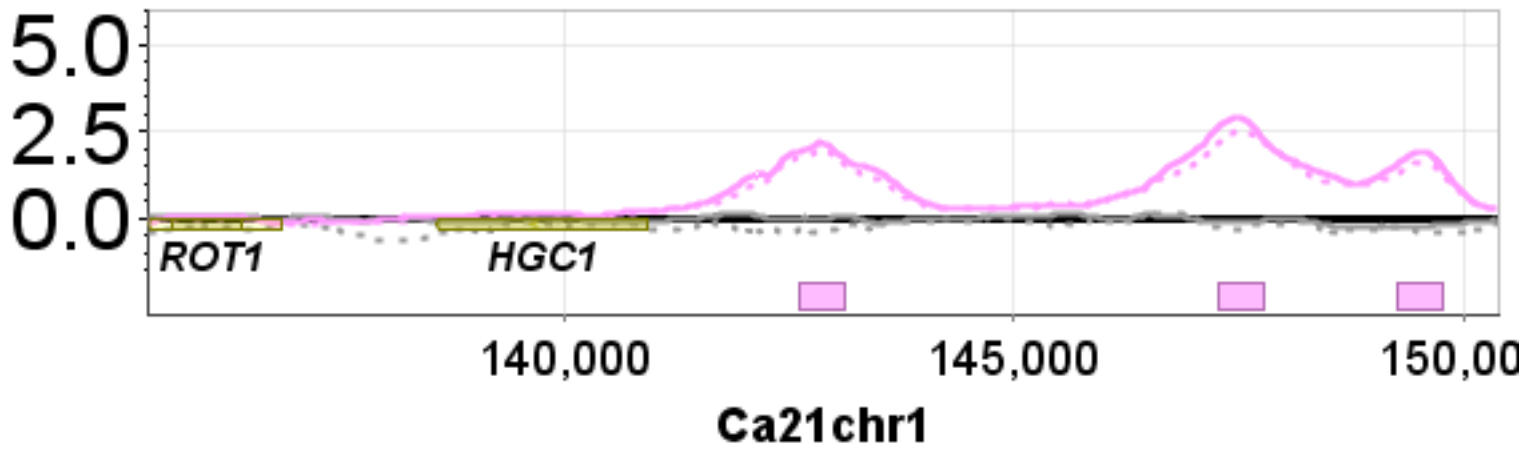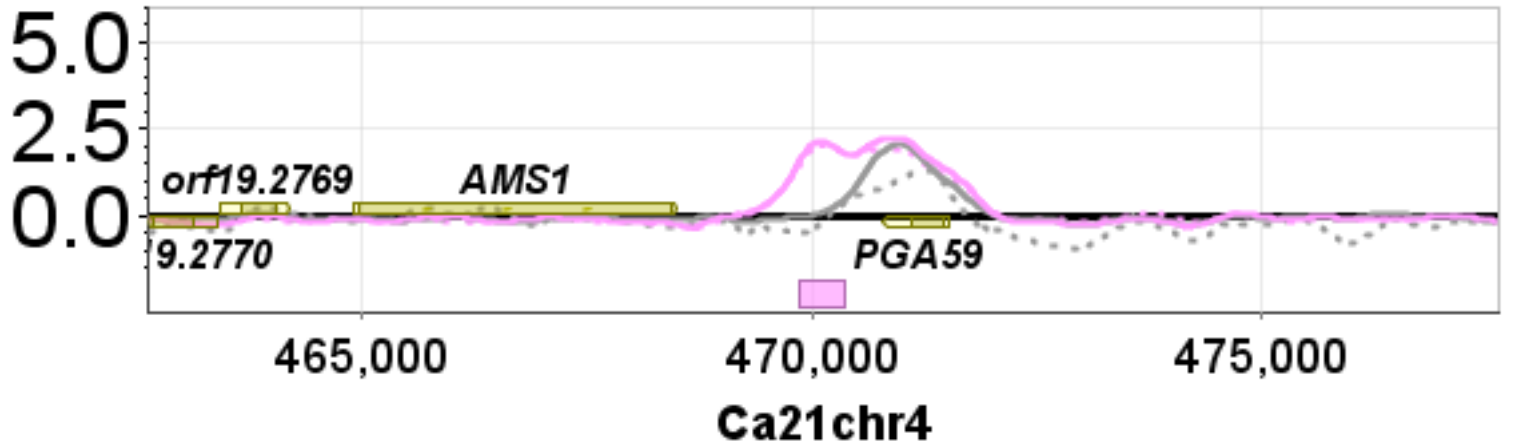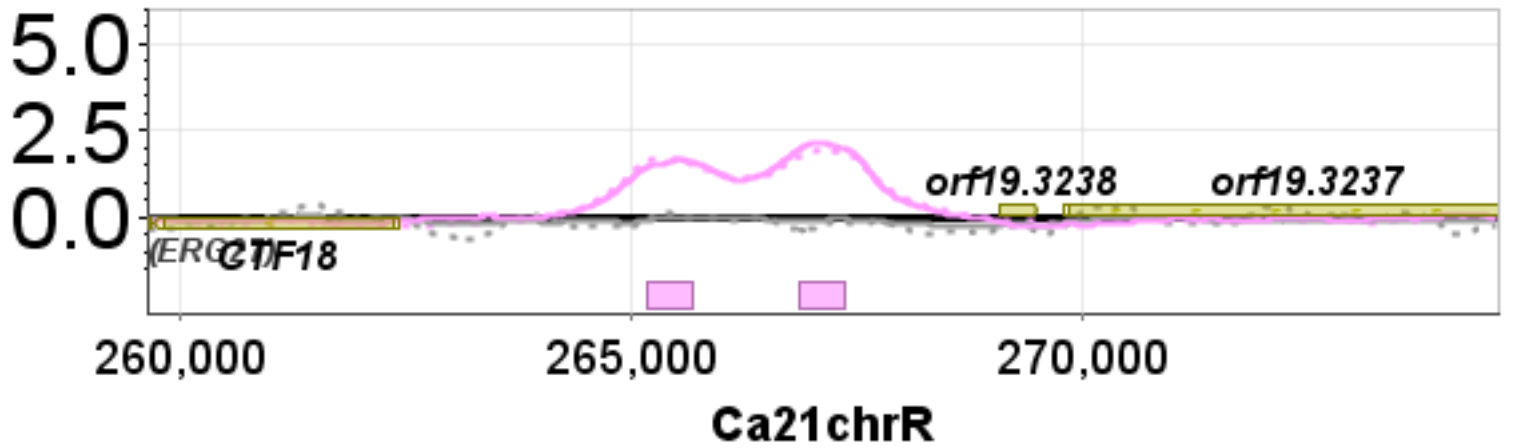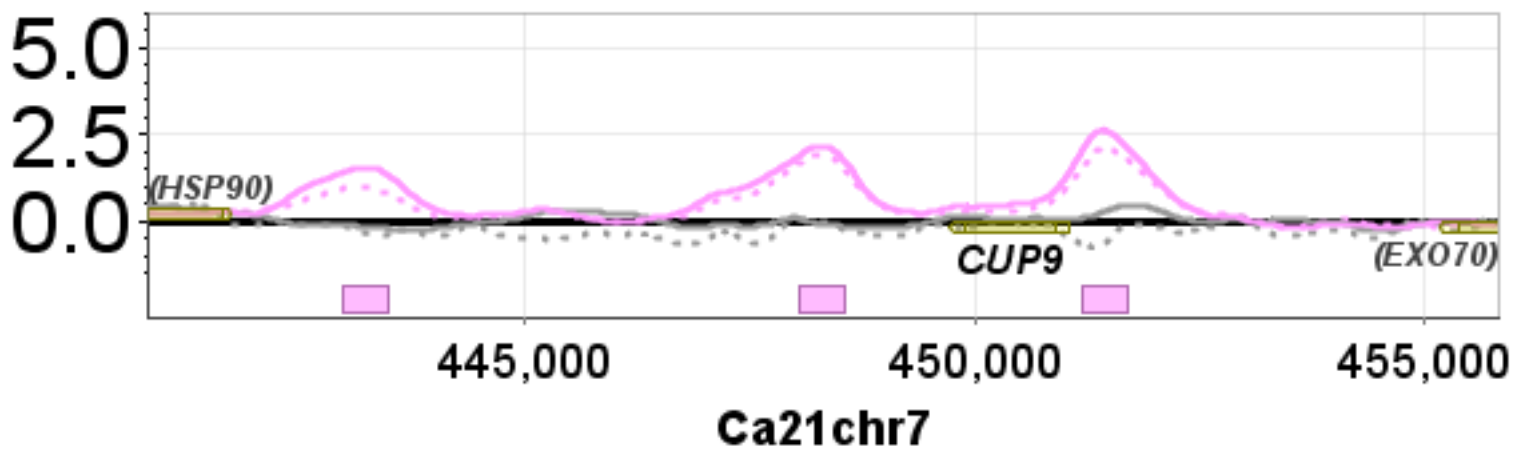

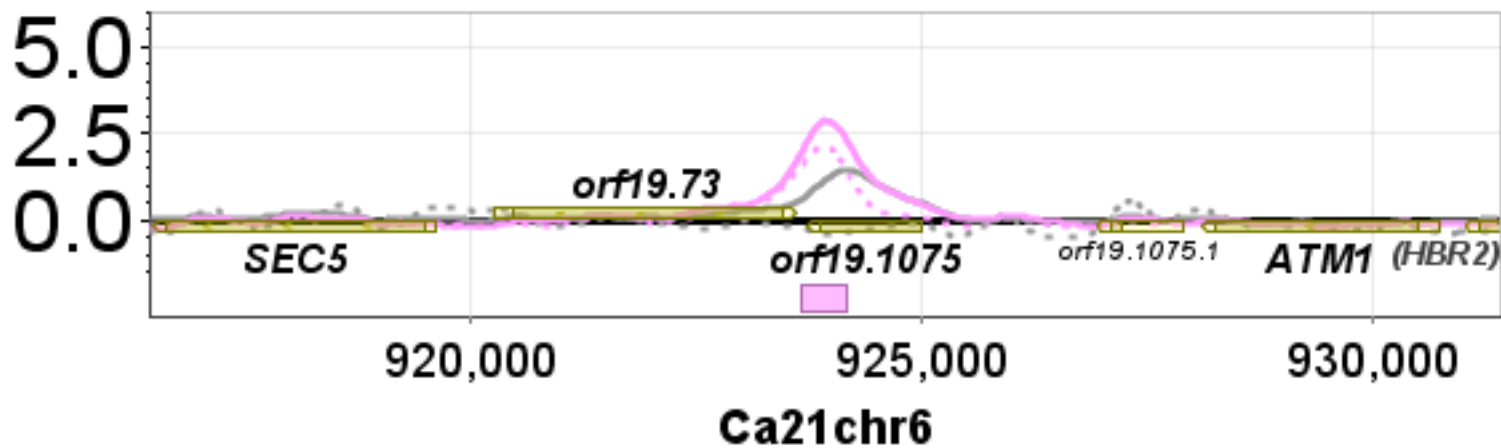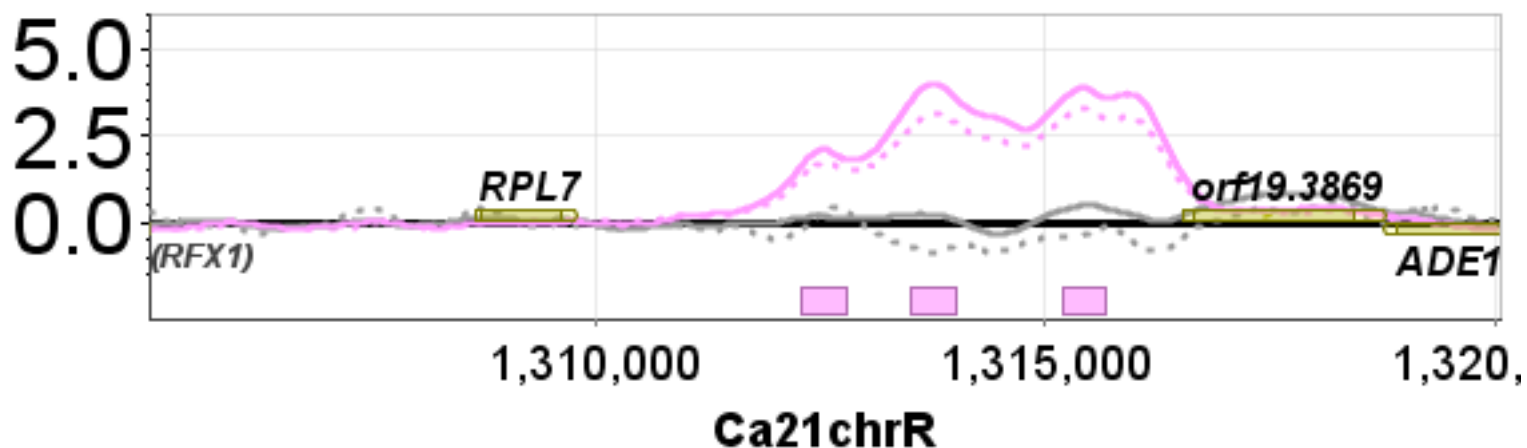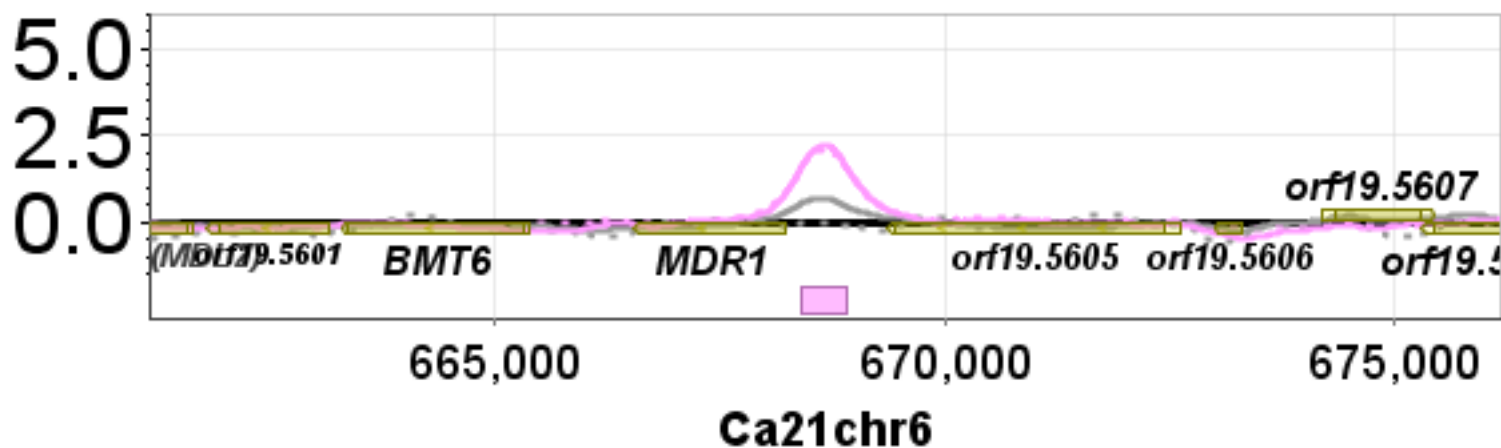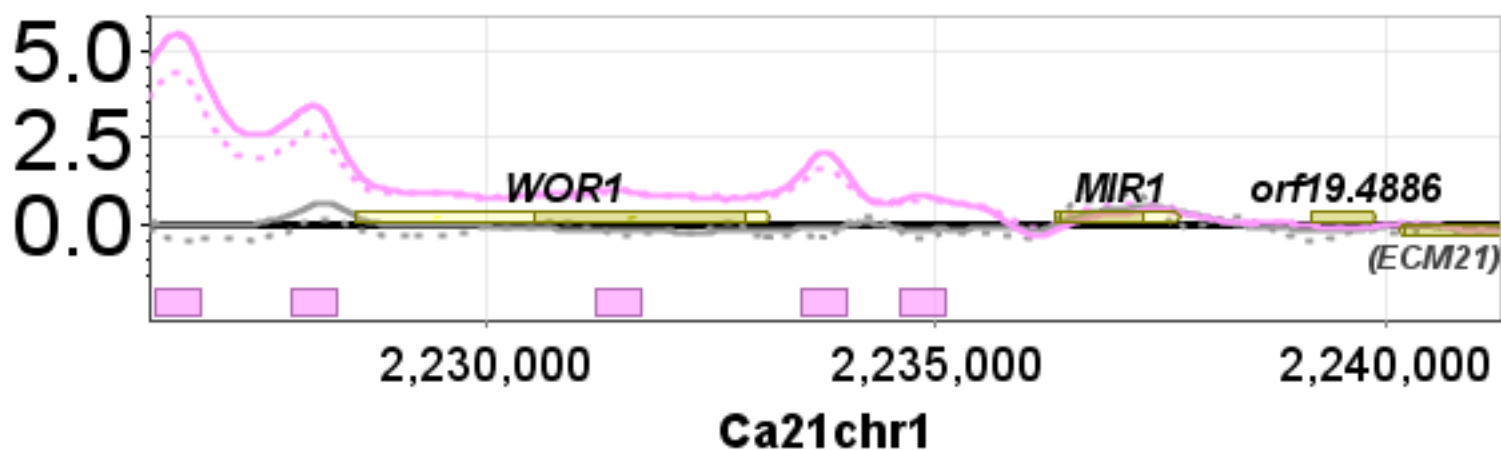

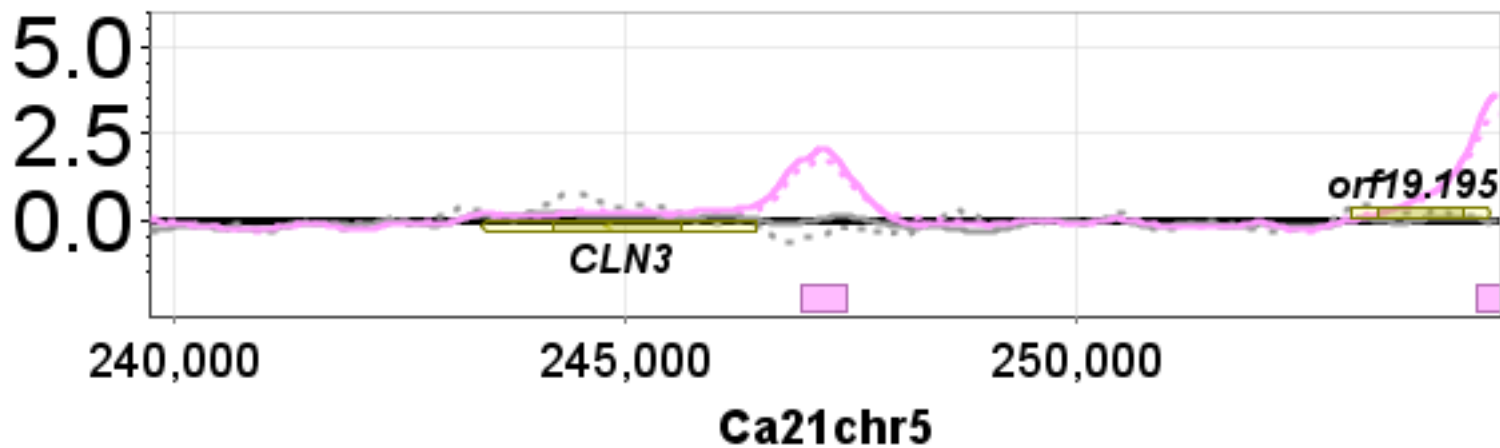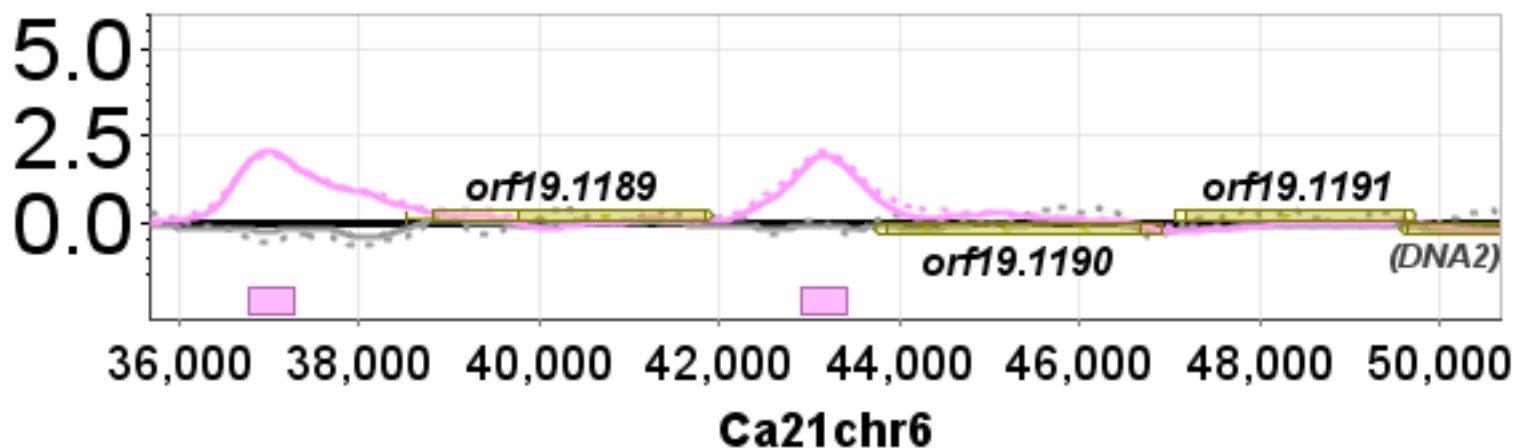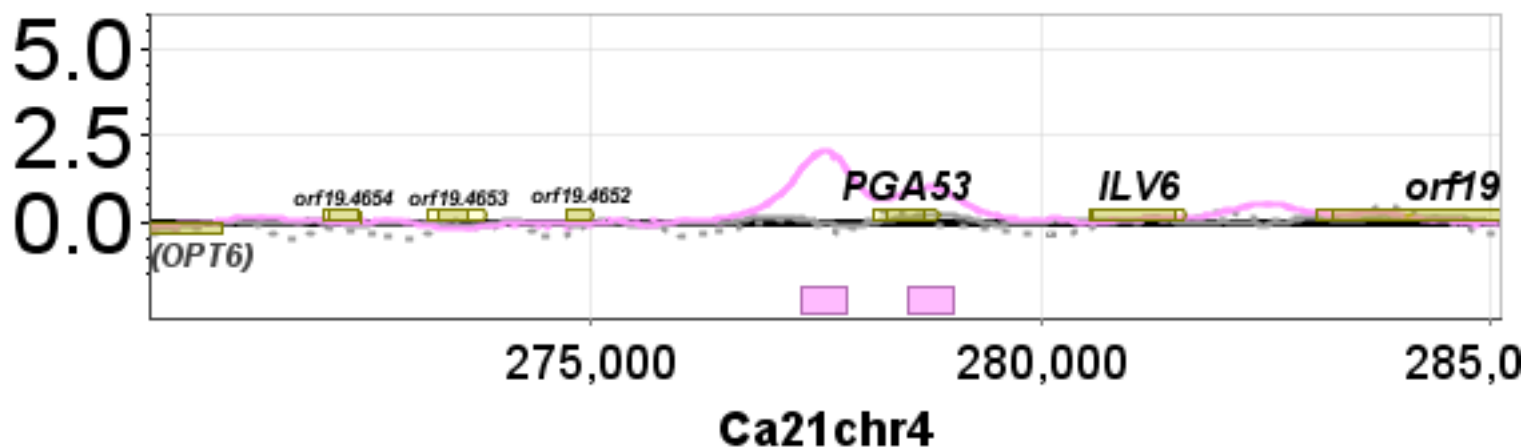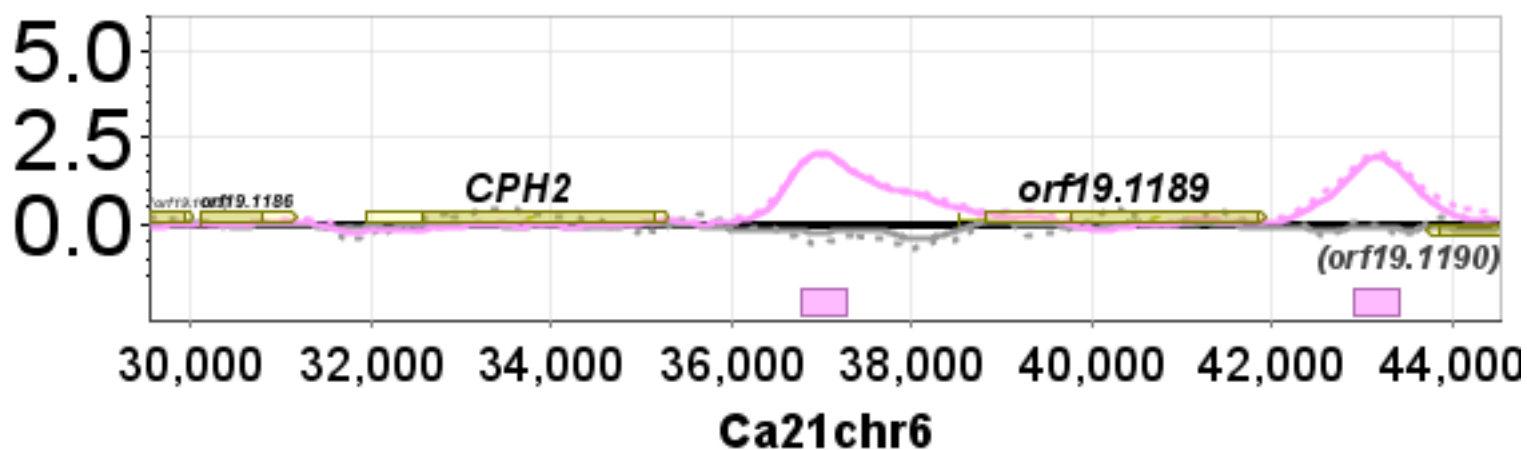

[2.046] Ca21chrR:869688-884687 [+] [orf19.467, ntar\_1253, ntar\_1254, ntar\_1255, HST7]

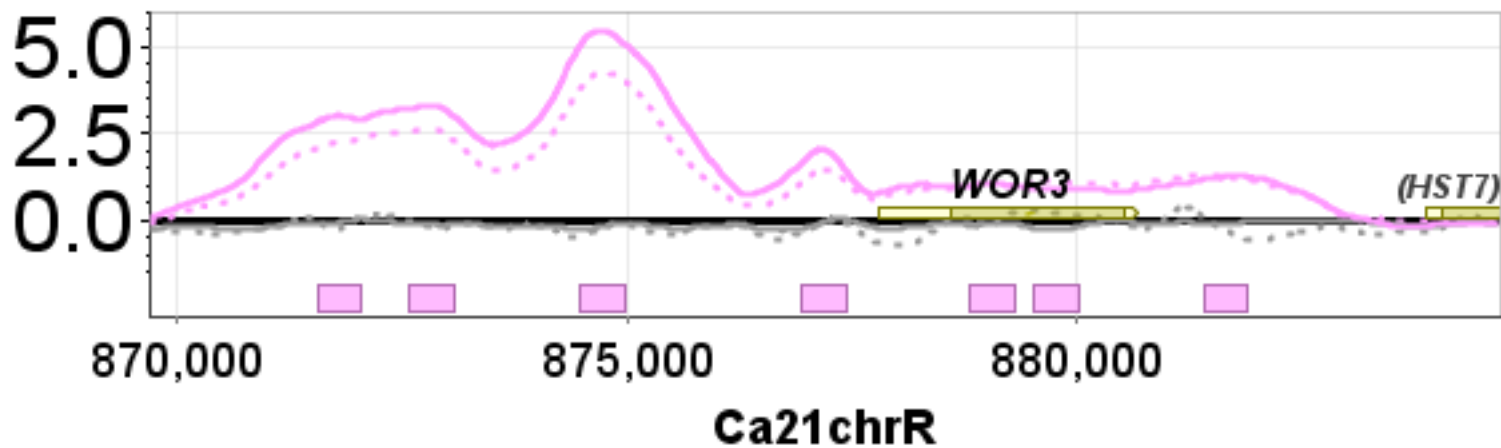

[1.997] Ca21chrR:1258044-1273043 [+] [ntar\_1292, ntar\_1291, SFL1, ntar\_1293]

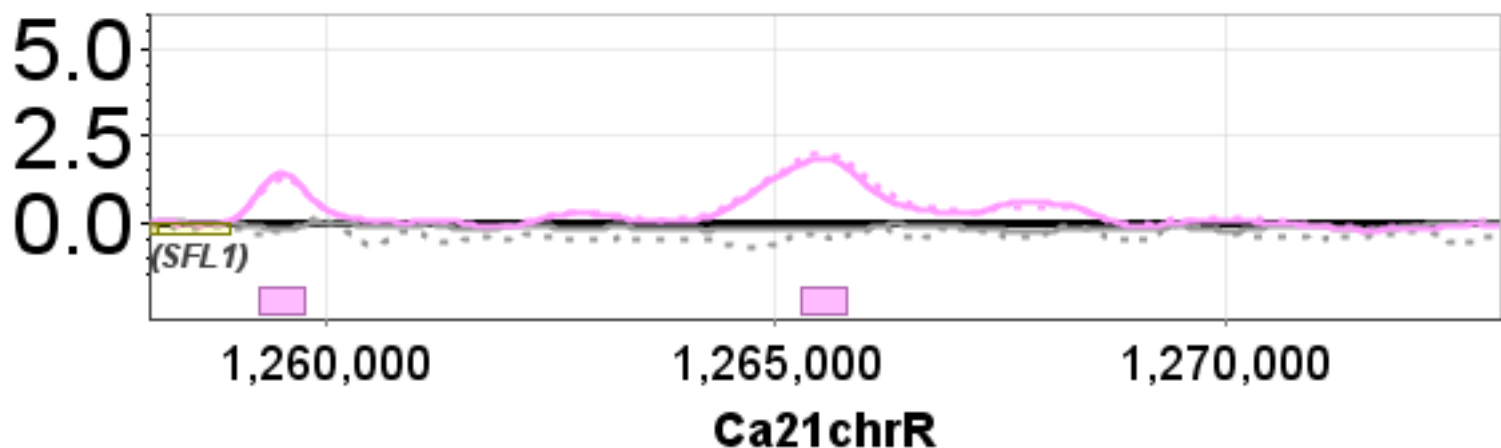

[1.985] Ca21chr3:1753577-1768576 [+] [orf19.6713, orf19.6712, orf19.6715, ntar\_688, UTP9]

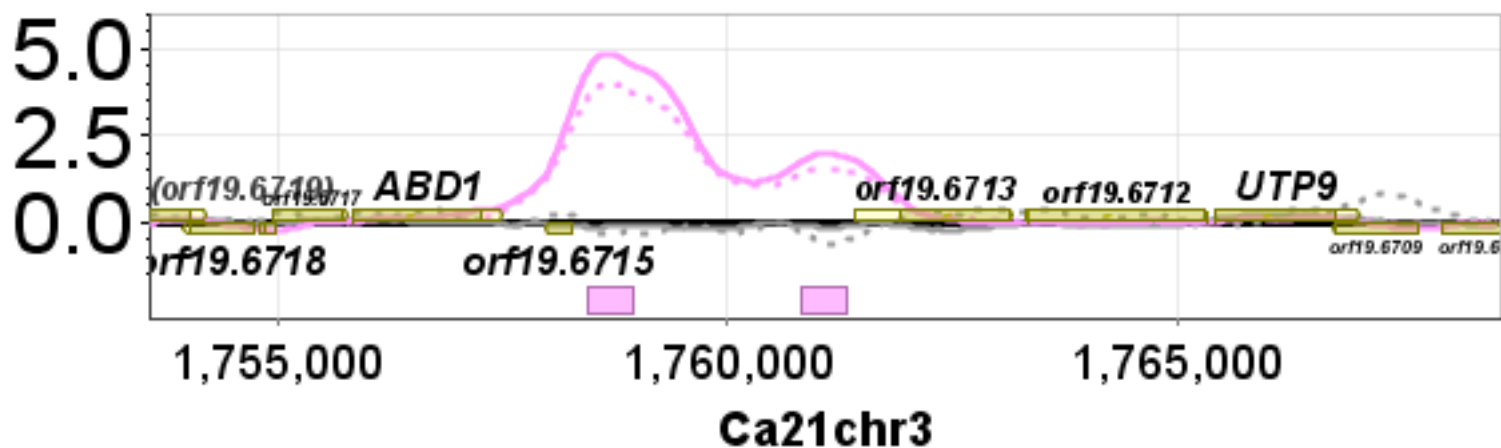

[1.984] Ca21chr2:446986-461985 [+] [orf19.1544, OPI1, orf19.1545, orf19.1546, ntar\_329]

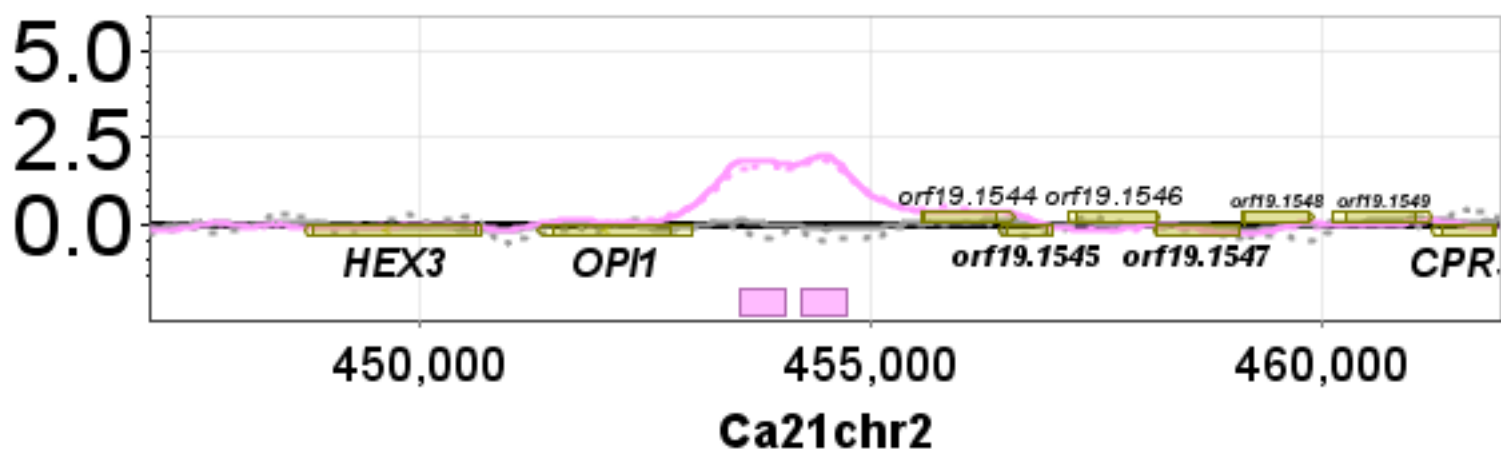

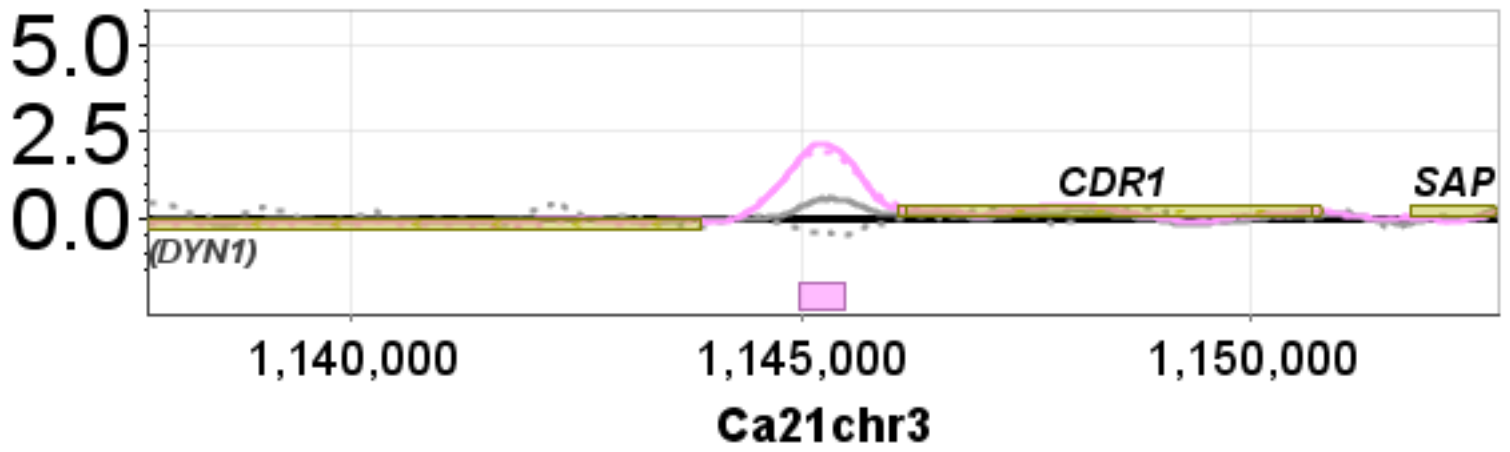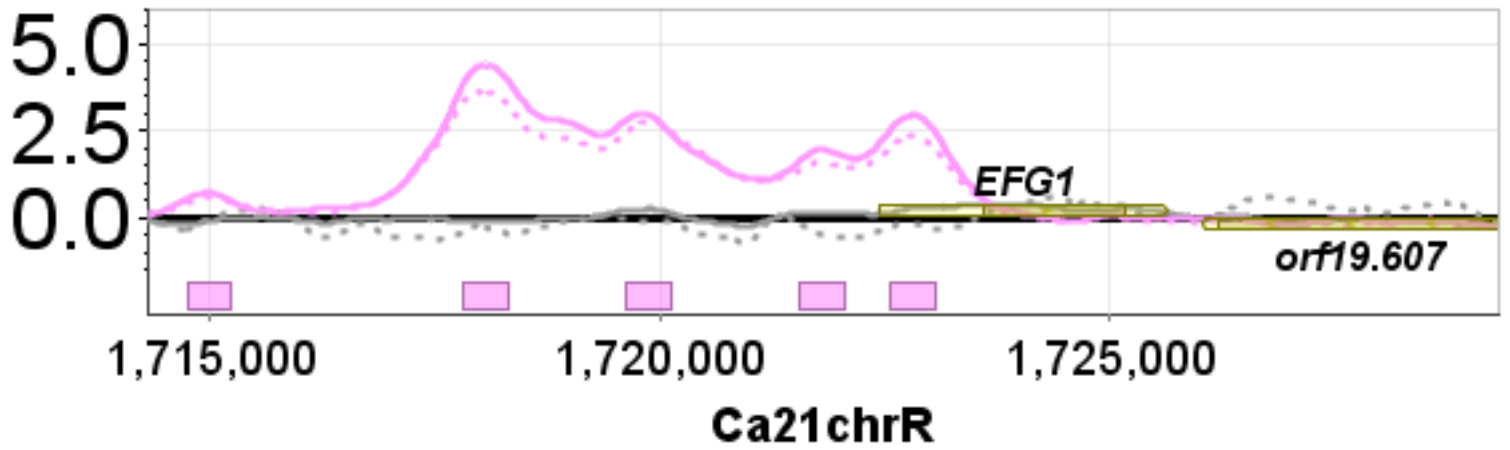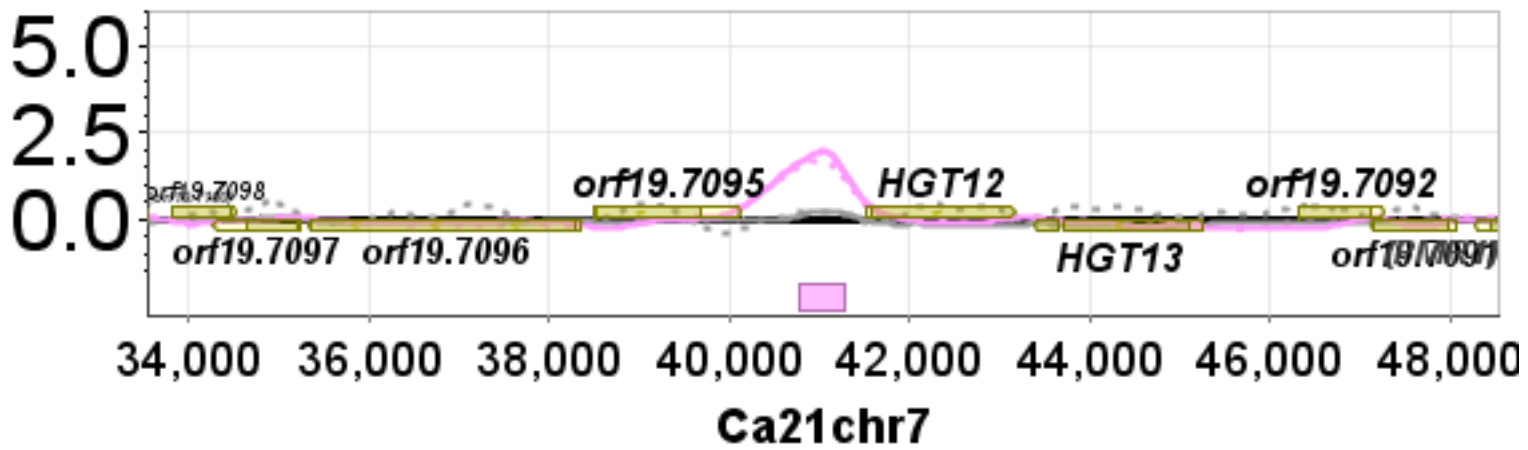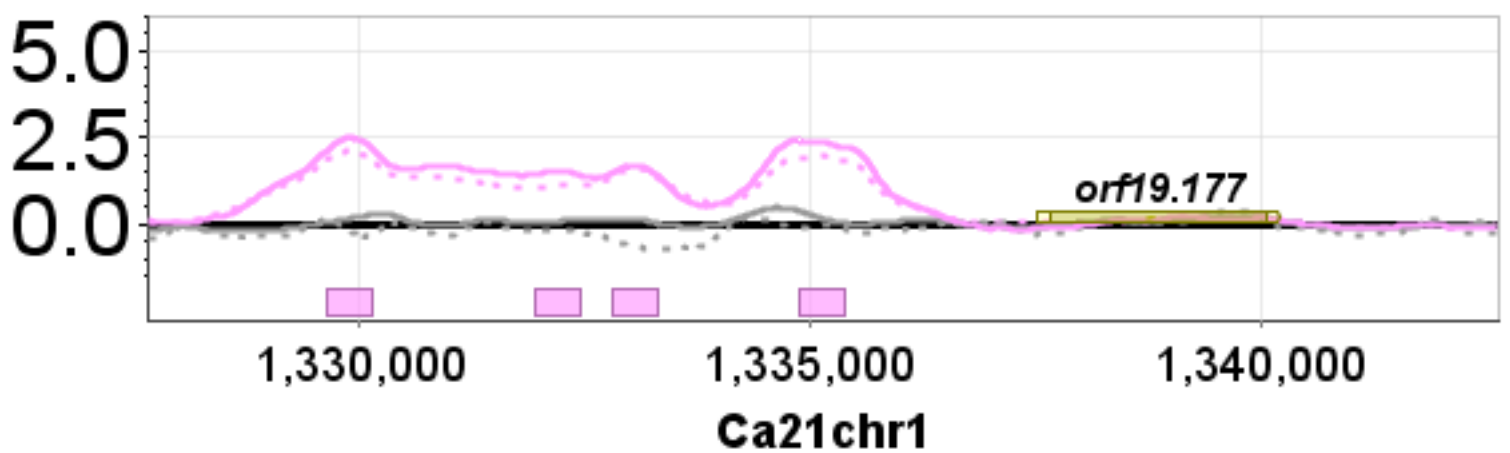



[1.929] Ca21chr2:1738839-1753838 [+] [ntar\_452, YWP1, ntar\_451, ntar\_449, ntar\_450]

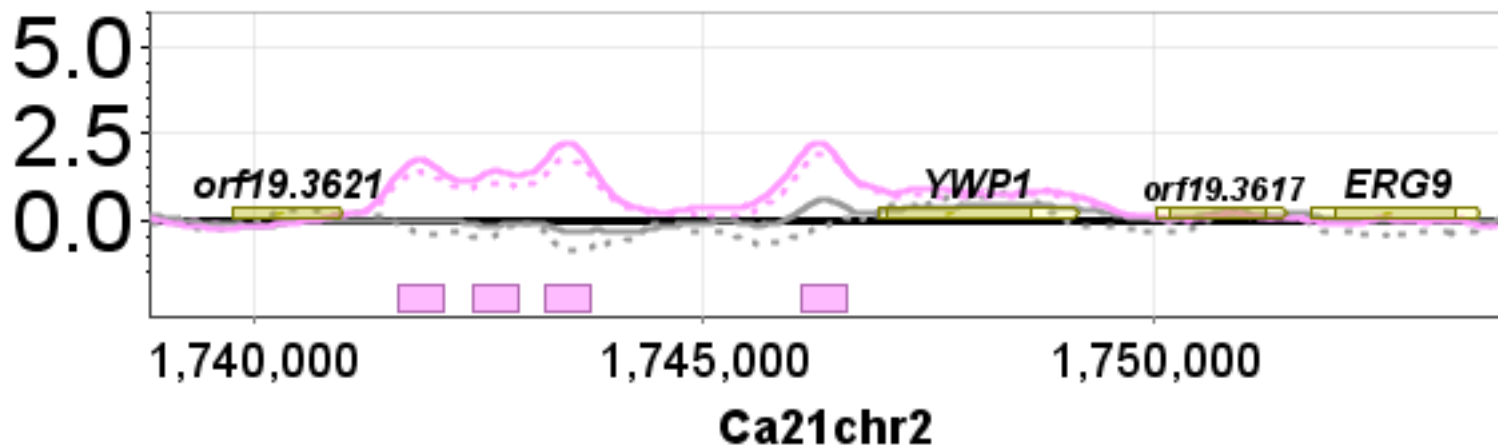

[1.928] Ca21chr1:142024-157023 [+] [orf19.6027, ntar\_16, ERG2, orf19.6025, orf19.6024]

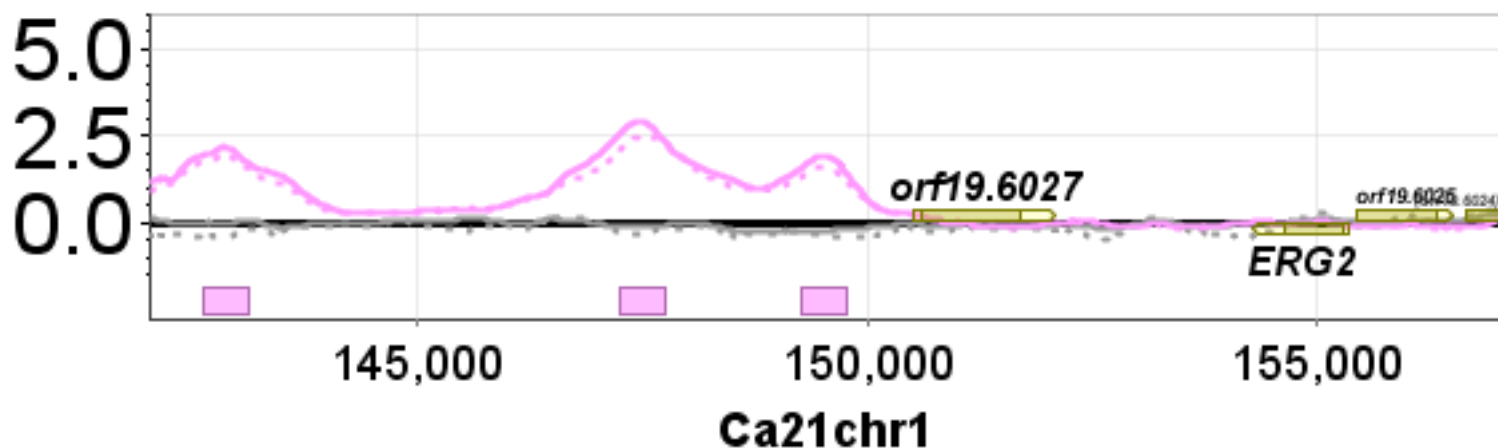

[1.928] Ca21chr4:933772-948771 [+] [ntar\_798, orf19.1409.3, orf19.1409.1, LYS4, orf19.1409.2]

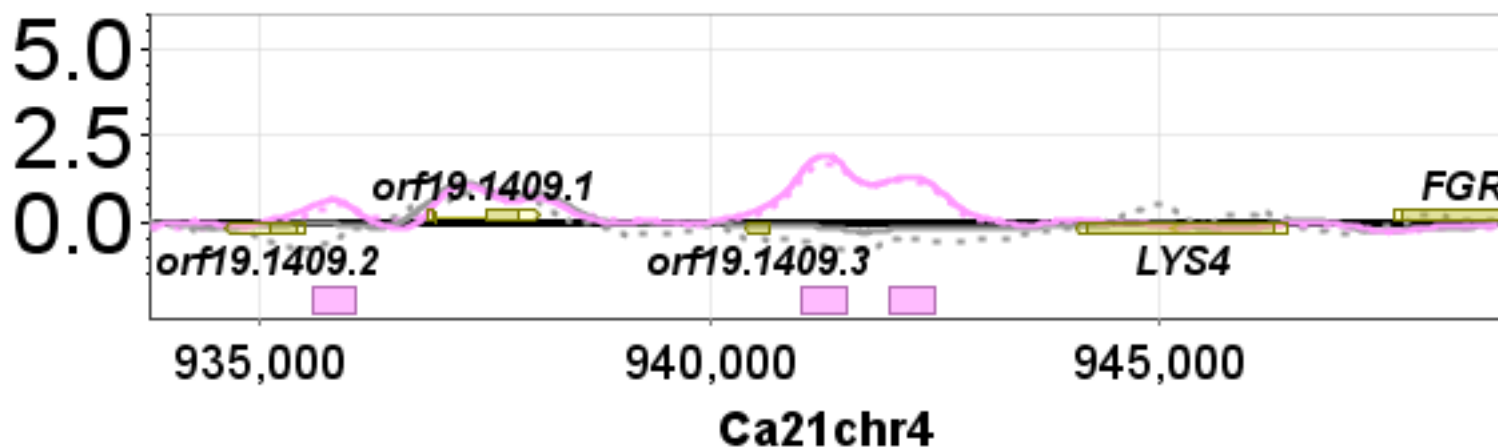

[1.905] Ca21chrR:2161644-2176643 [+] [ntar\_1405, FAA4, ntar\_1406, orf19.7590, ntar\_1404]

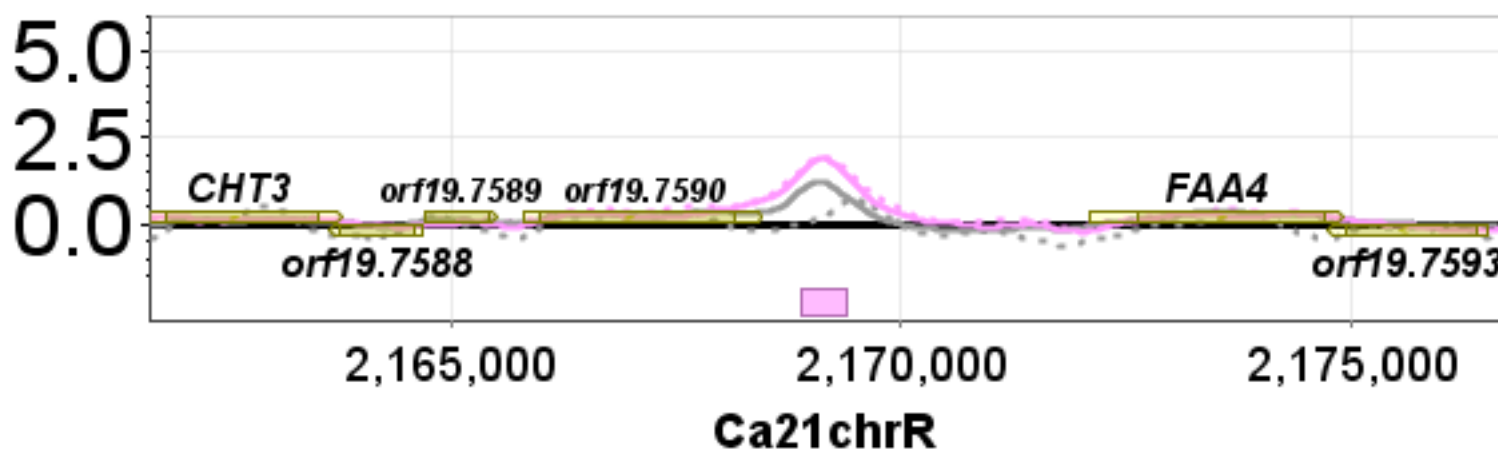

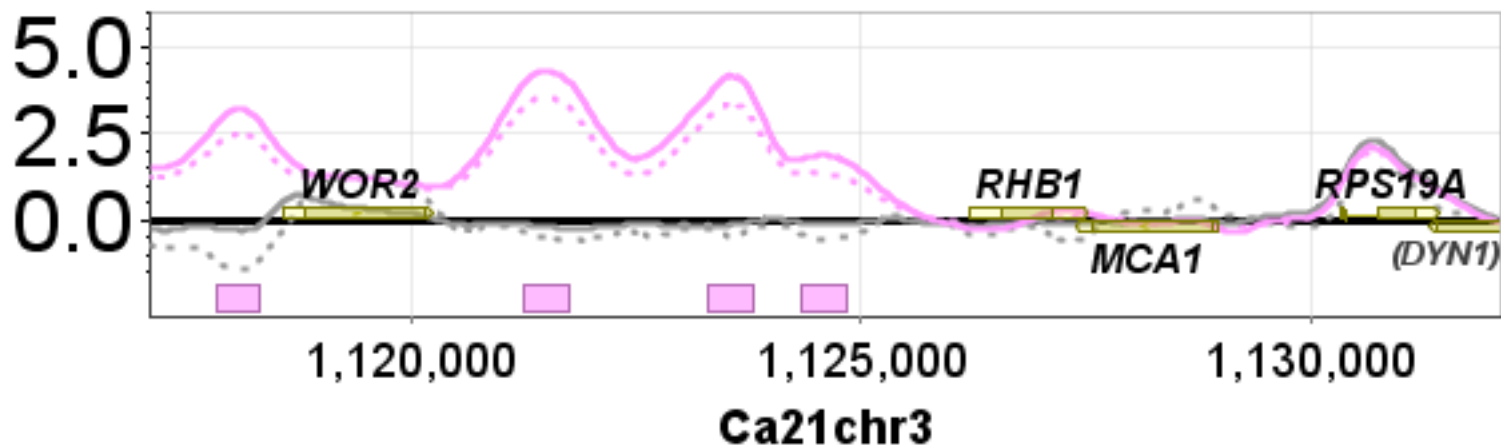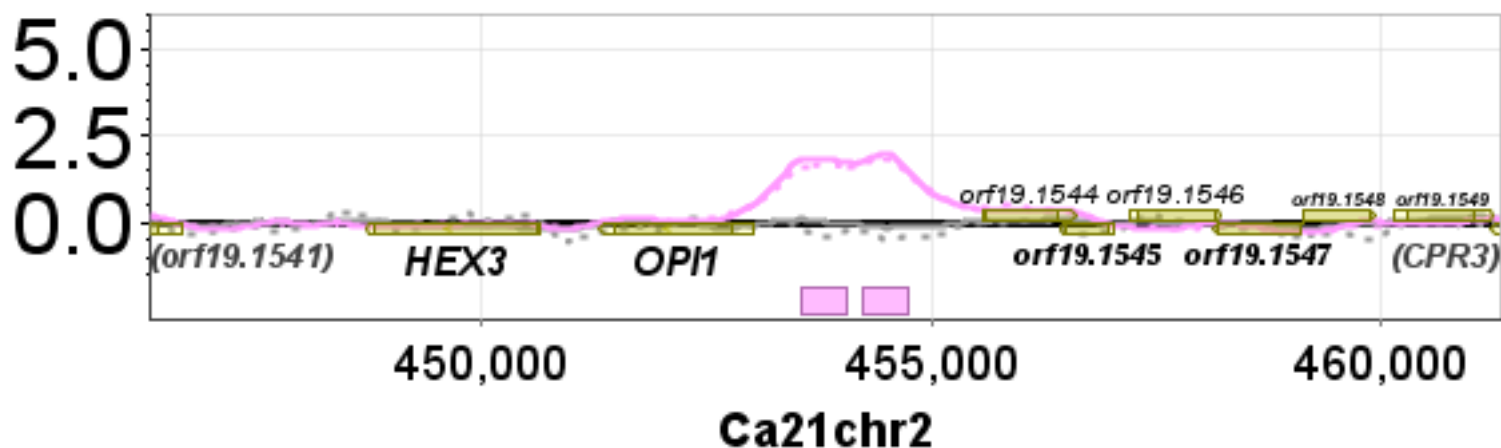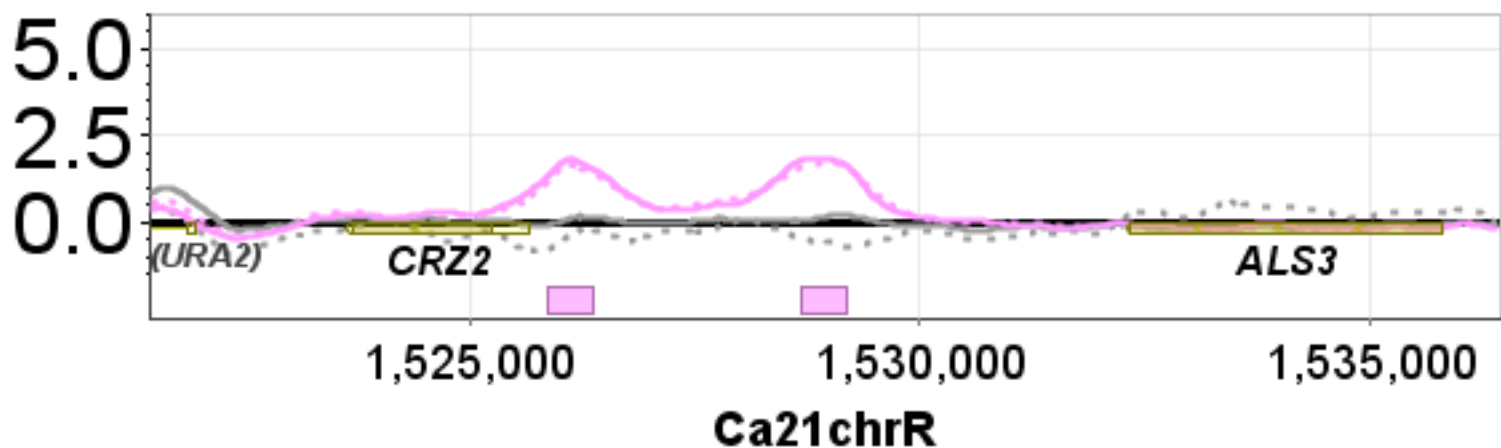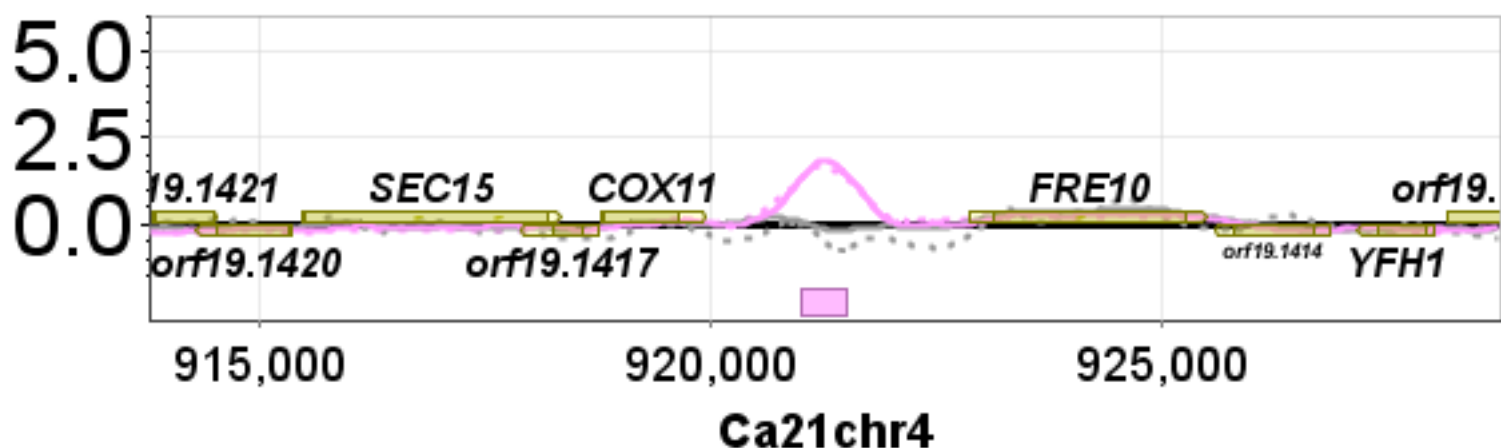

[1.83] Ca21chr7:910408-925407 [+] [NRG1, ntar\_1153, orf19.7151, ntar\_1152, ntar\_1151]

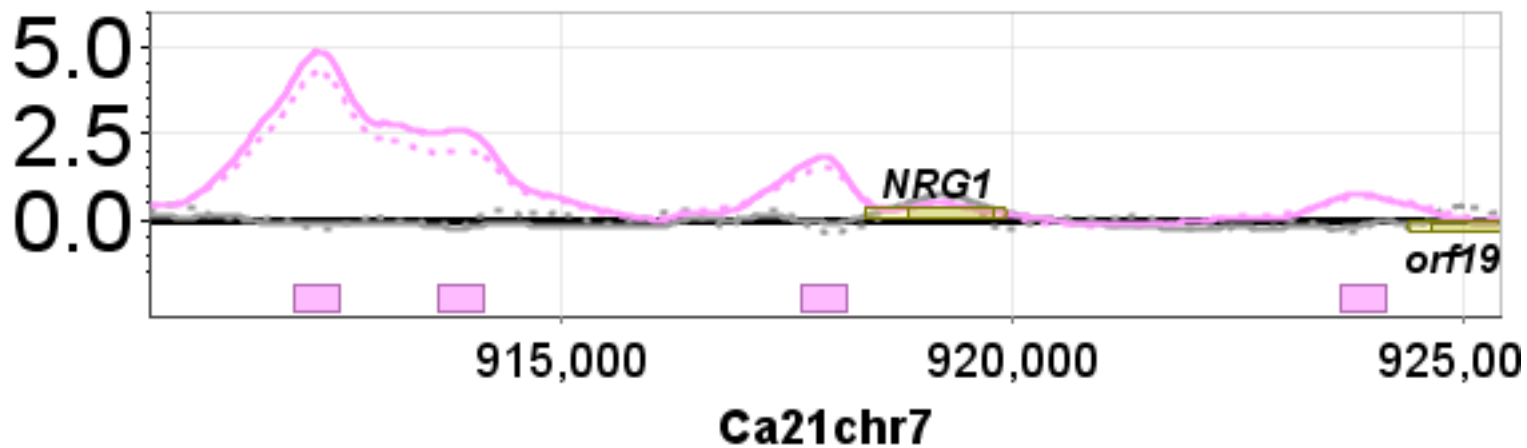

[1.806] Ca21chrR:1518612-1533611 [+] [CRZ2, ntar\_1331, URA2, ALS3]

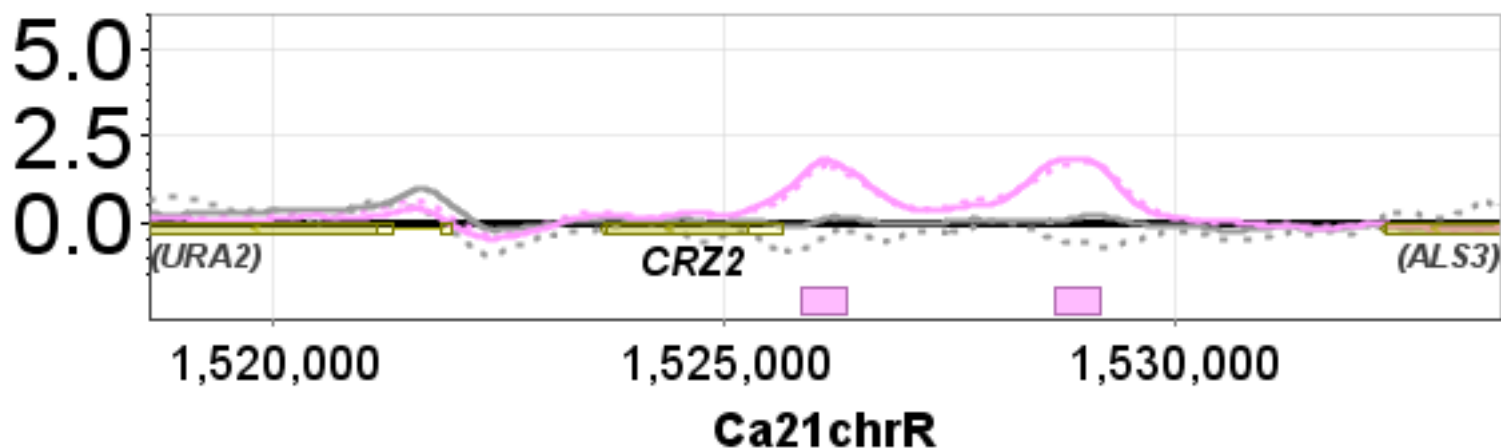

[1.778] Ca21chr1:2615791-2630790 [+] [orf19.5267, ntar\_246, orf19.5268, orf19.5269, orf19.5266]

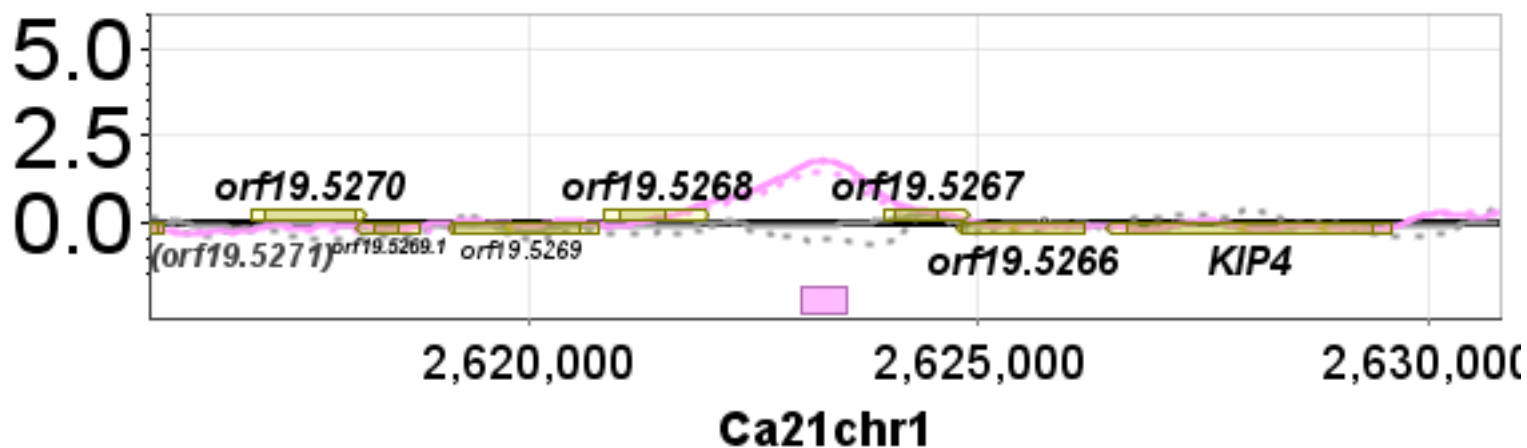

[1.774] Ca21chr5:725720-740719 [+] [RMS1, BUB3, orf19.2657, orf19.2653]

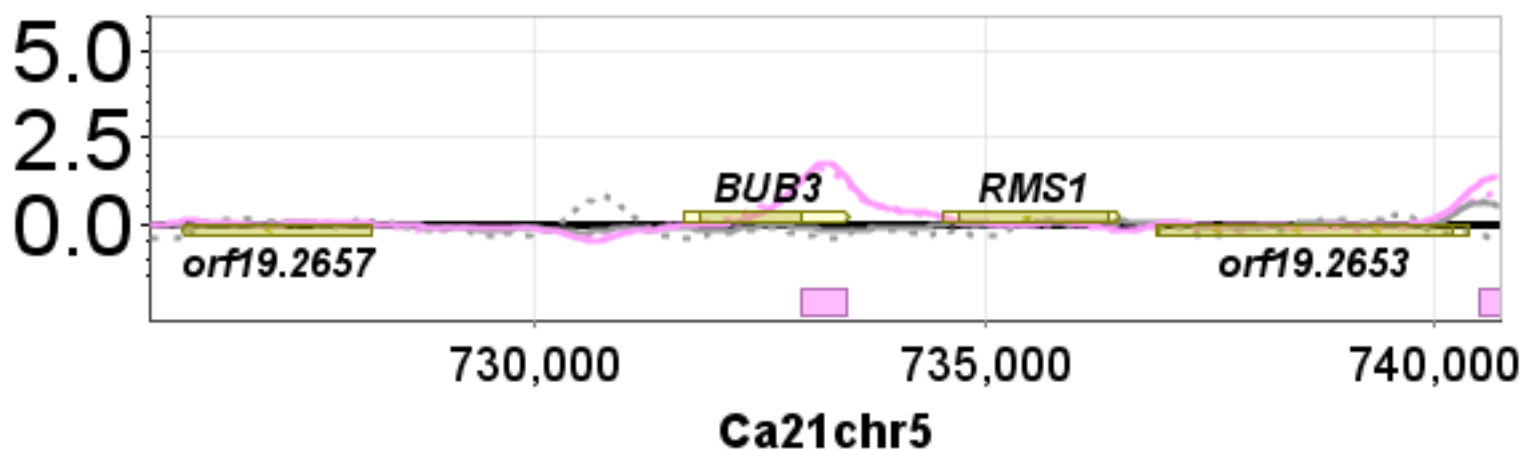

[1.75] Ca21chr2:1734351-1749350 [+] [ntar\_446, ntar\_447, ntar\_445, ntar\_448, orf19.3621]

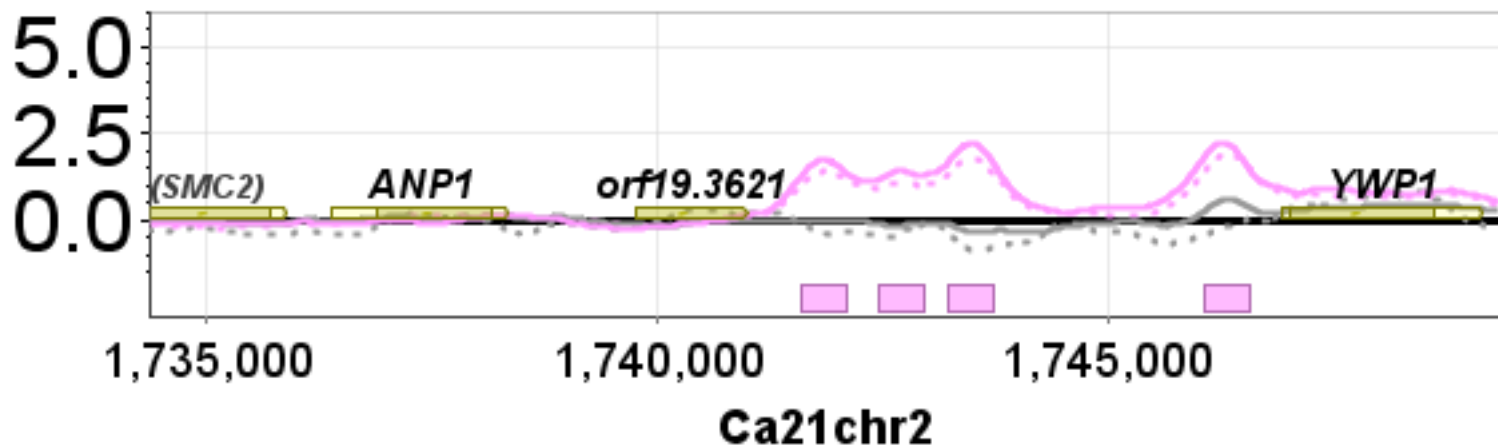

[1.749] Ca21chr1:443892-458891 [+] [orf19.3671, GAL1, GAL10, orf19.3673, ntar\_43]

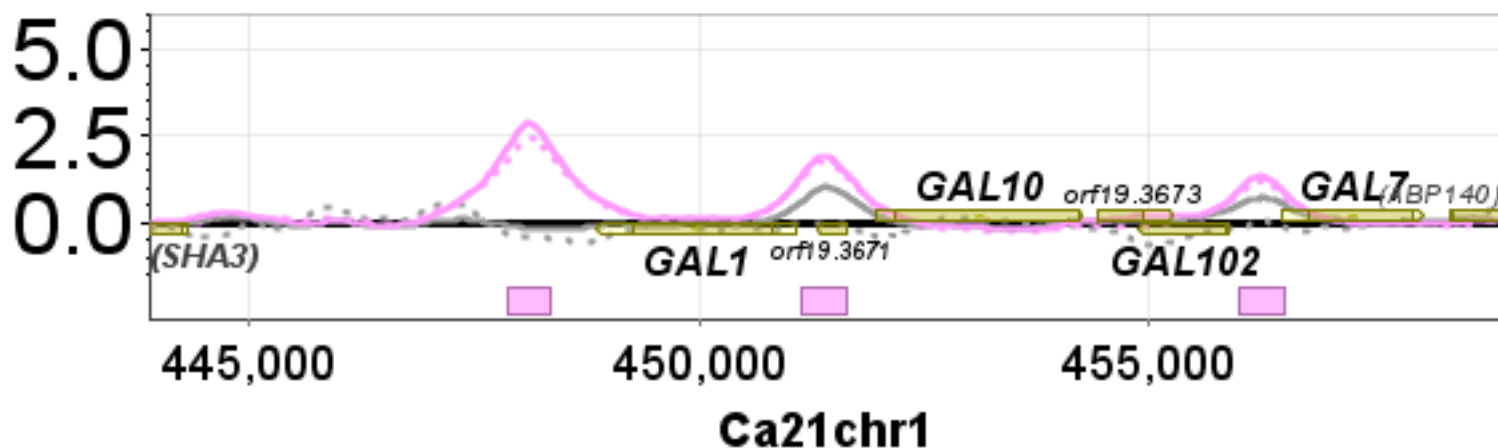

[1.744] Ca21chr3:1168038-1183037 [+] [ntar\_627, ntar\_626, orf19.6968, USO6, orf19.6966]

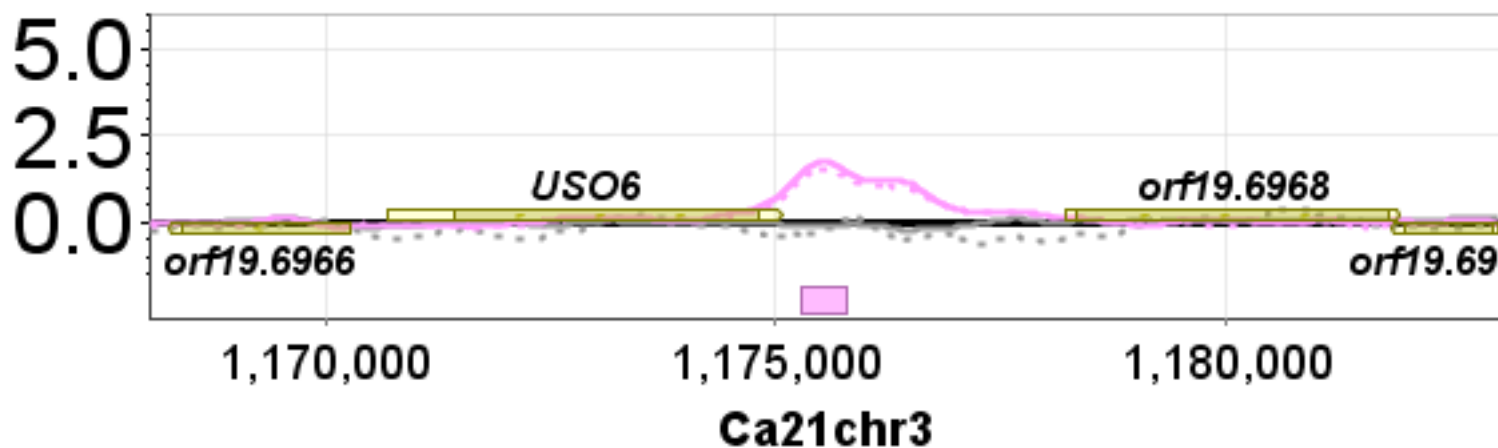

[1.742] Ca21chr2:773684-788683 [+] [orf19.850, orf19.851, orf19.849, SAP98, SAP99]

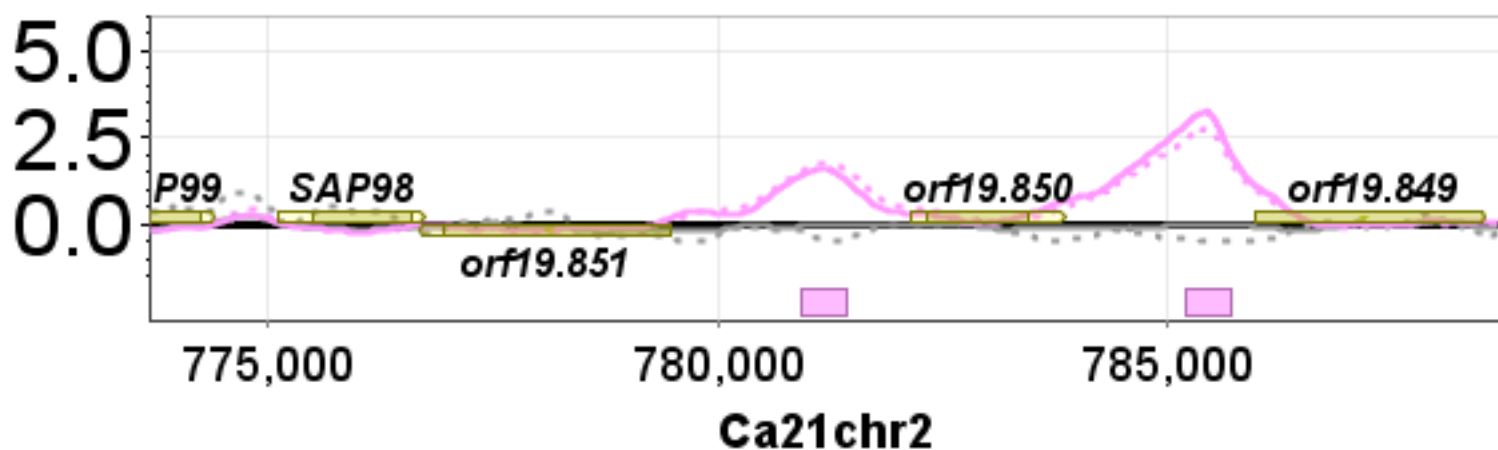

[1.722] Ca21chr3:1352726-1367725 [+] [orf19.7381, CAM1]

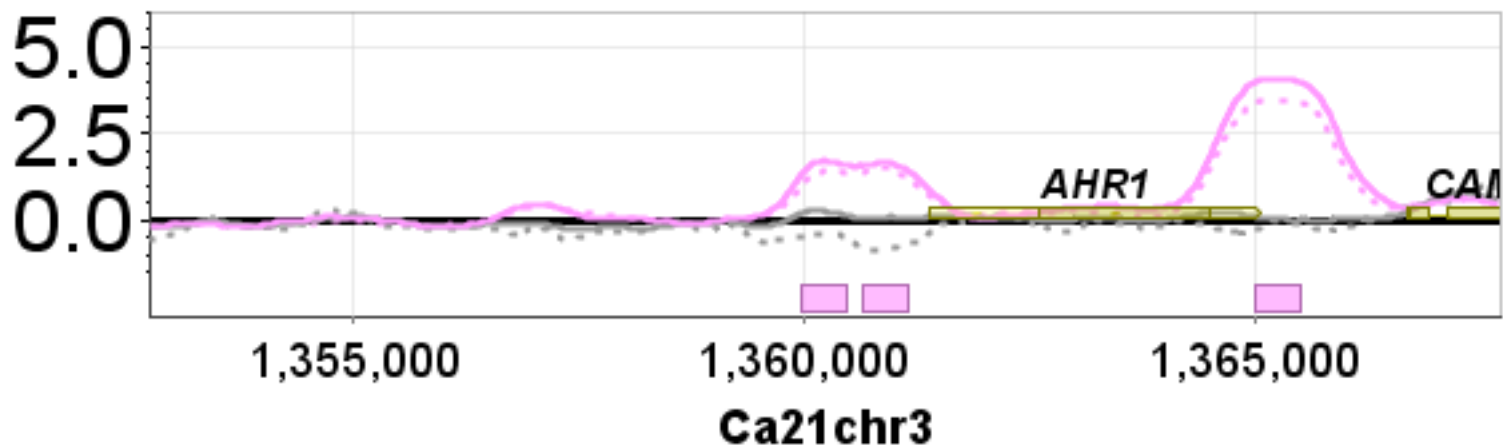

[1.721] Ca21chr2:1864771-1879770 [+] [Intar\_471, ntar\_470, IFF6, MET10, ntar\_469]

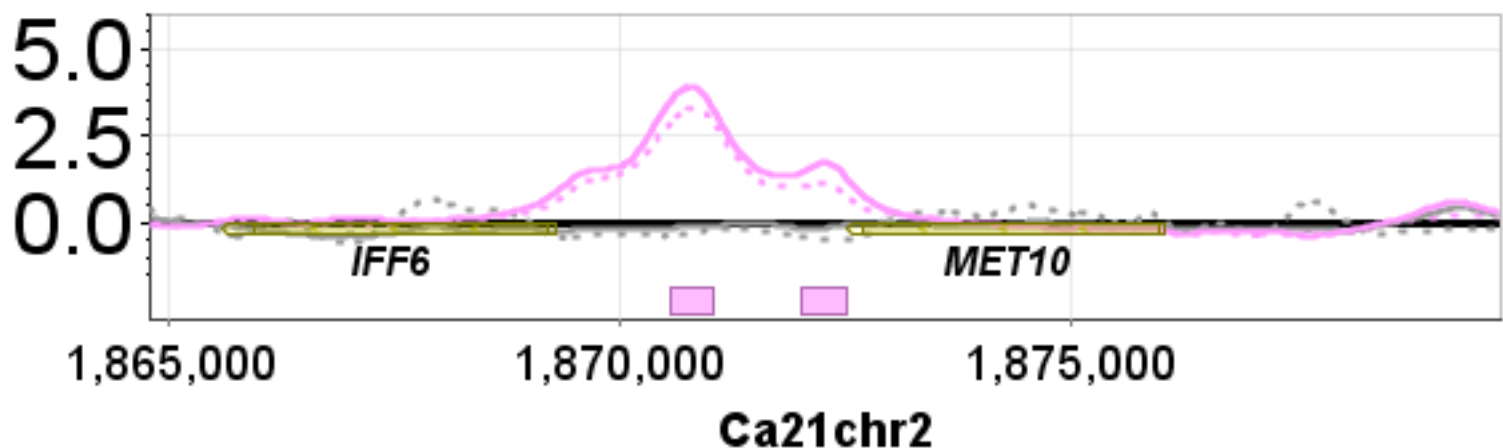

[1.716] Ca21chr6:575058-590057 [+] [orf19.5556, MNN4-4, orf19.5555, ntar\_1010, ntar\_1011]

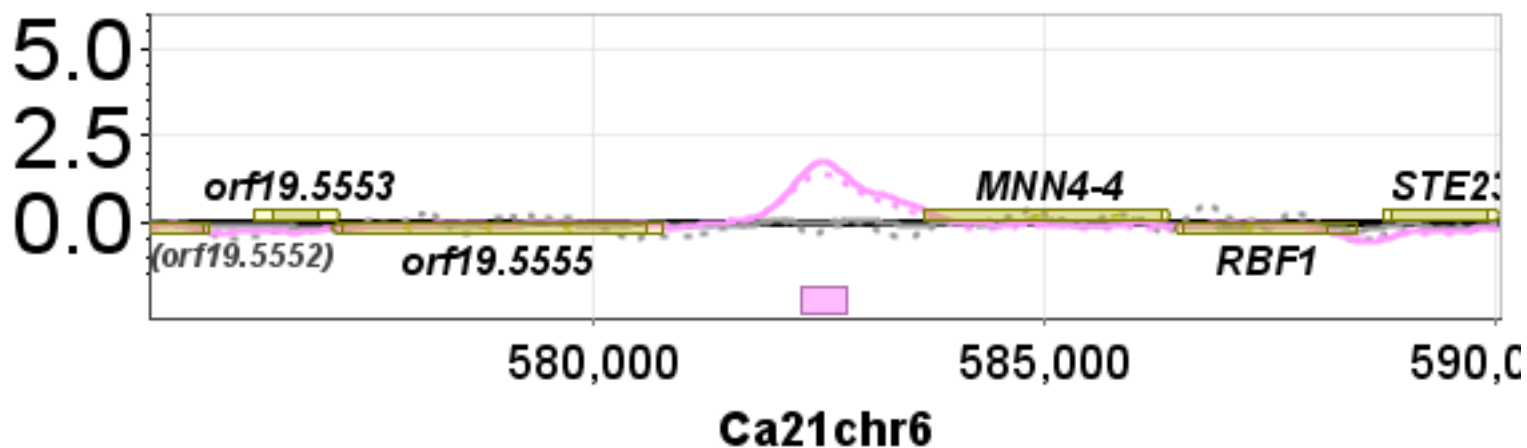

[1.702] Ca21chr1:432564-447563 [+] [HGT2, SHA3, ntar\_41, ntar\_40, ntar\_42]

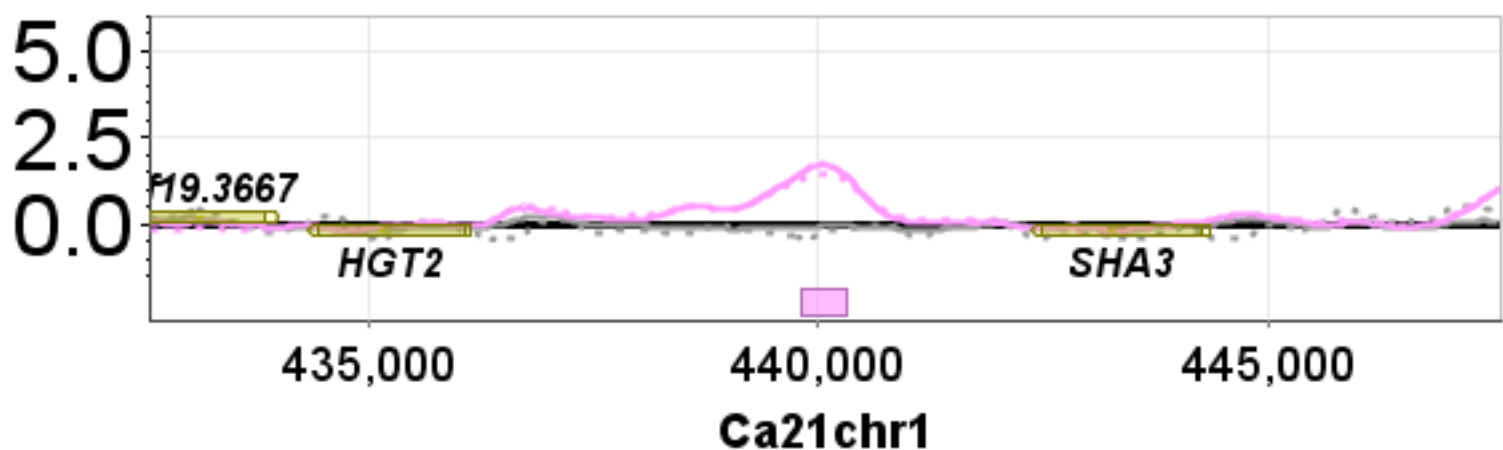

[1.701] Ca21chrR:437208-452207 [+] [OPT1, orf19.2604, orf19.2605, HEM1, HDA1]

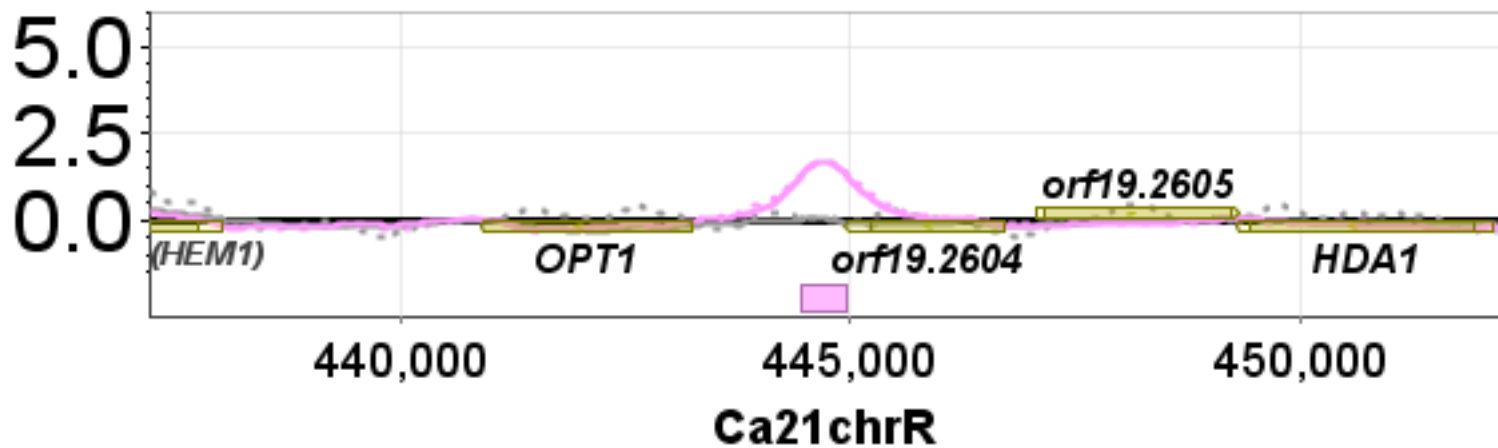

[1.688] Ca21chr1:1325556-1340555 [+] [Intar\_127, orf19.177, orf19.6280]

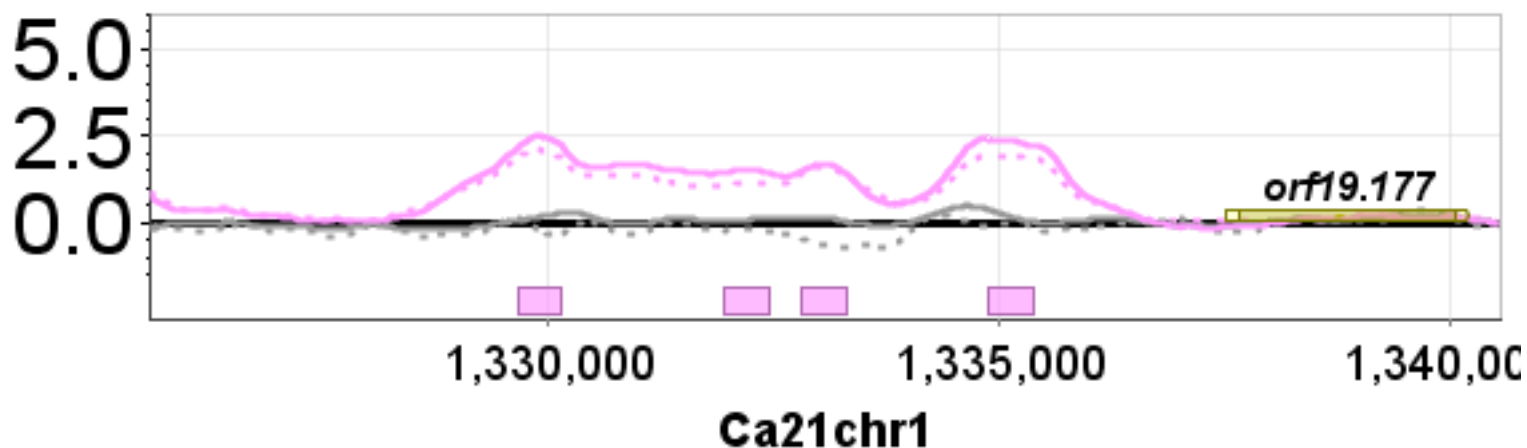

[1.686] Ca21chrR:257923-272922 [+] [Intar\_1177, ntar\_1176, ntar\_1178, ntar\_1175.5, ntar\_1179.1]

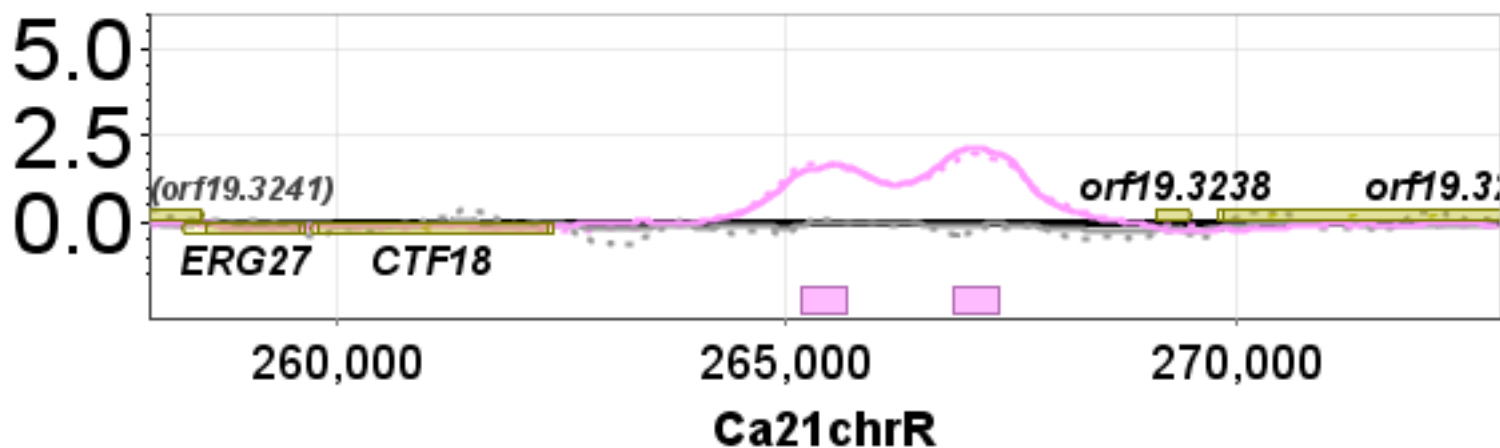

[1.669] Ca21chr5:1108485-1123484 [+] [orf19.4000, orf19.4001, orf19.3999, orf19.3998, ADH1]

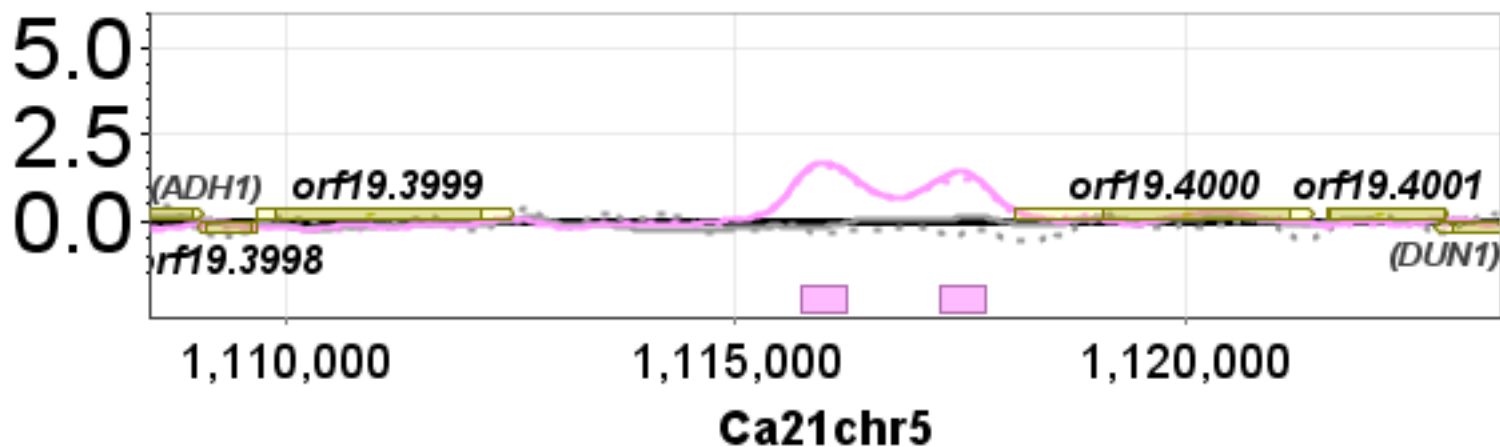

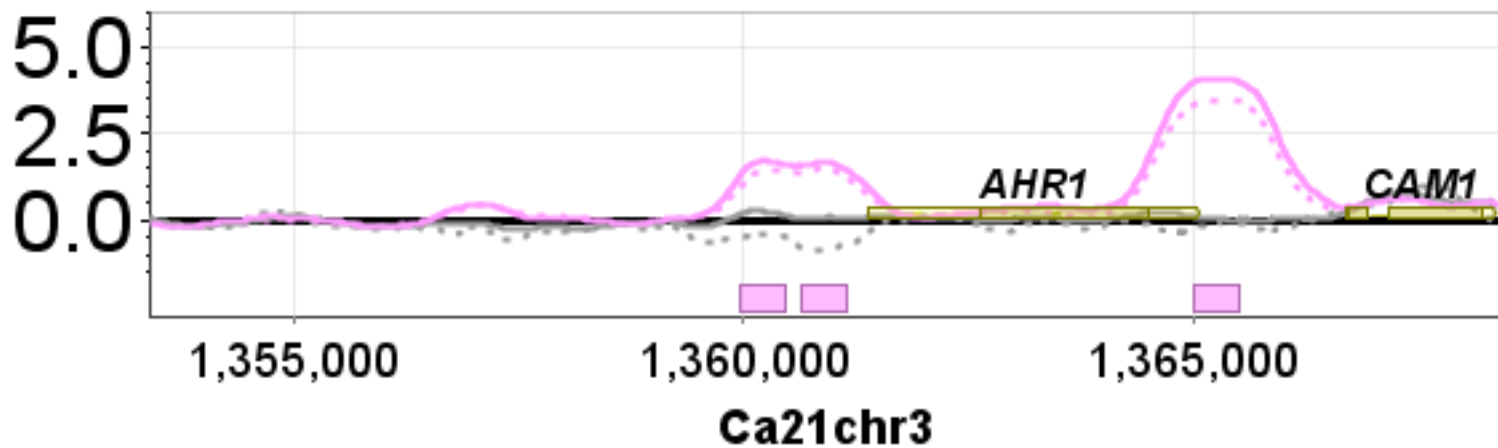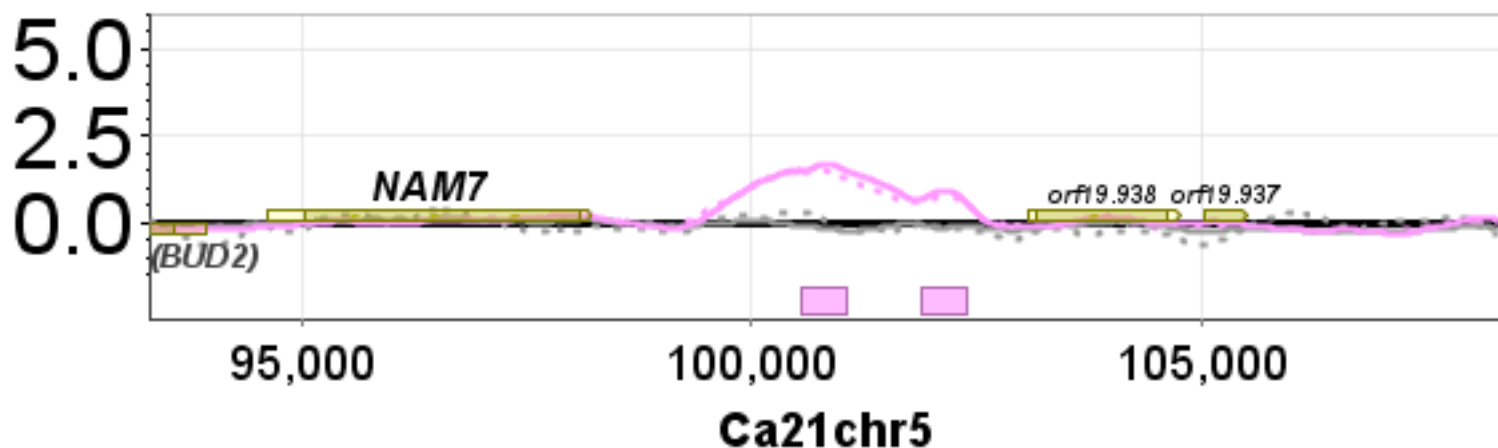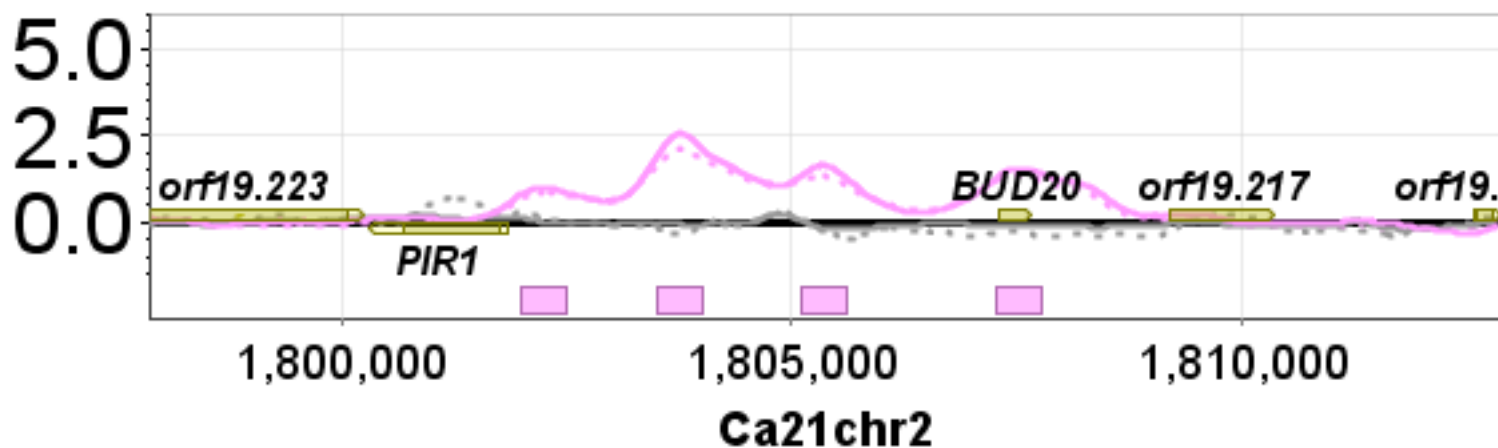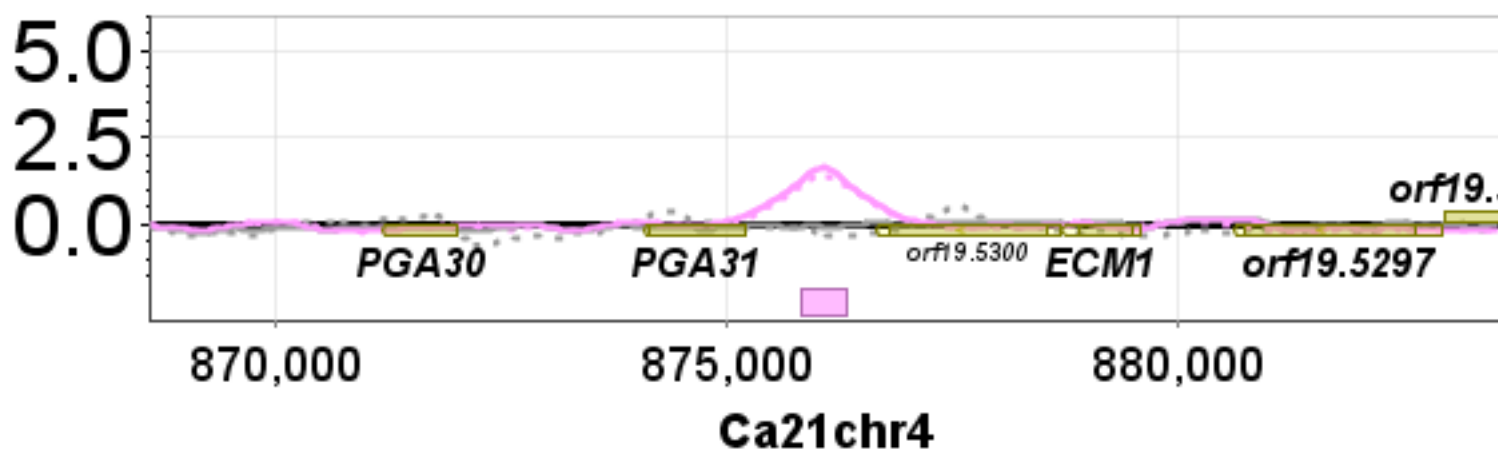

[1.635] Ca21chr7:107235-122234 [+] [GAC1, orf19.7054, ntar\_1413, ntar\_1056, ntar\_1057]

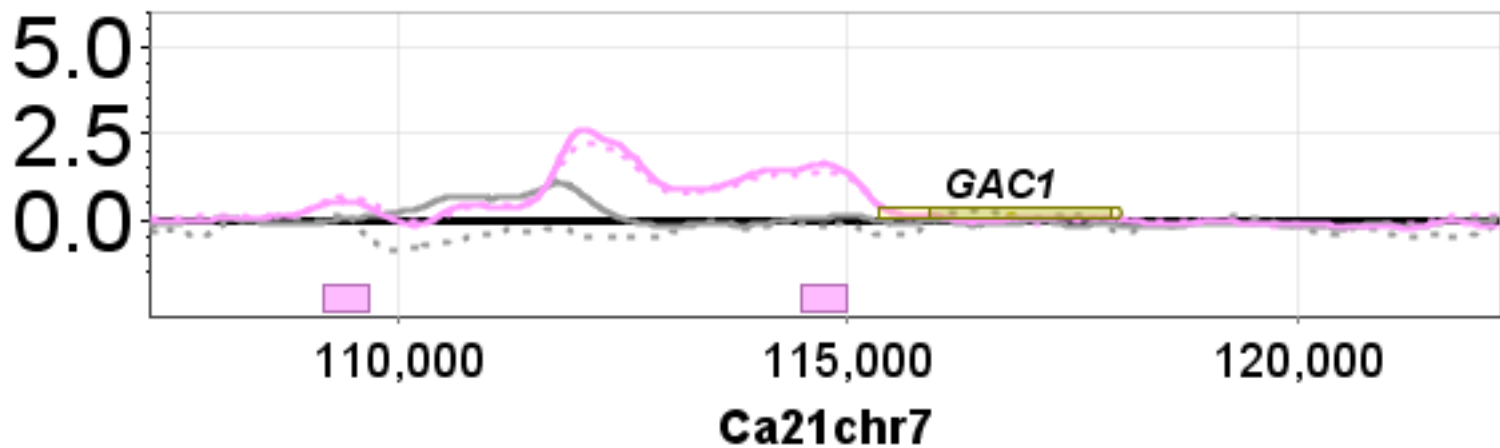

[1.624] Ca21chrR:2150639-2165638 [+] [INO1, ntar\_1403, CHT3, orf19.7583, orf19.7588]

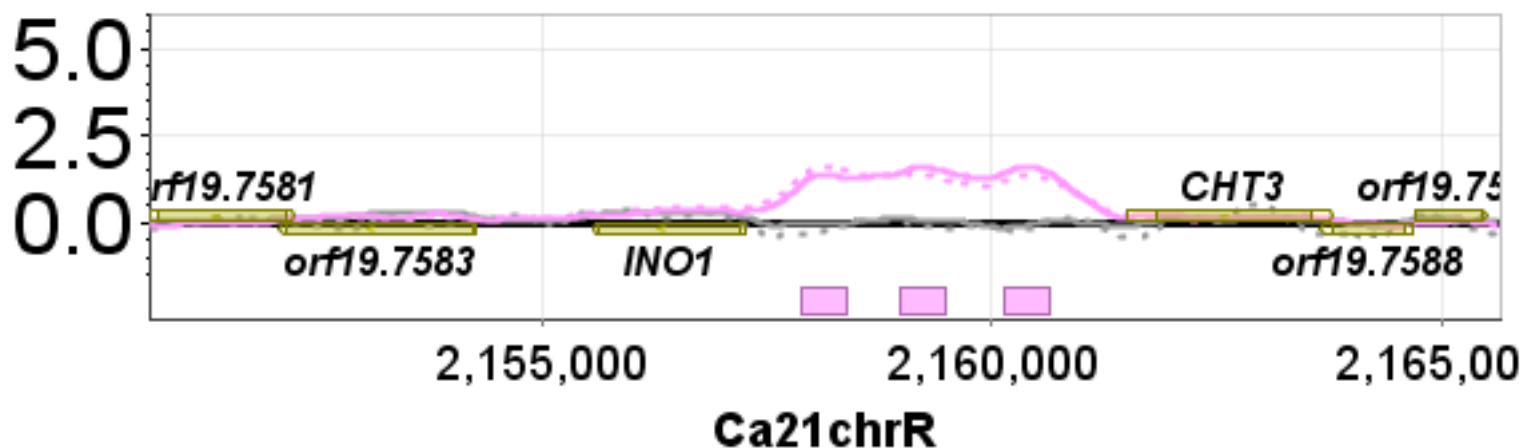

[1.623] Ca21chrR:2151737-2166736 [+] [INO1, CHT3, ntar\_1403, orf19.7583, orf19.7588]

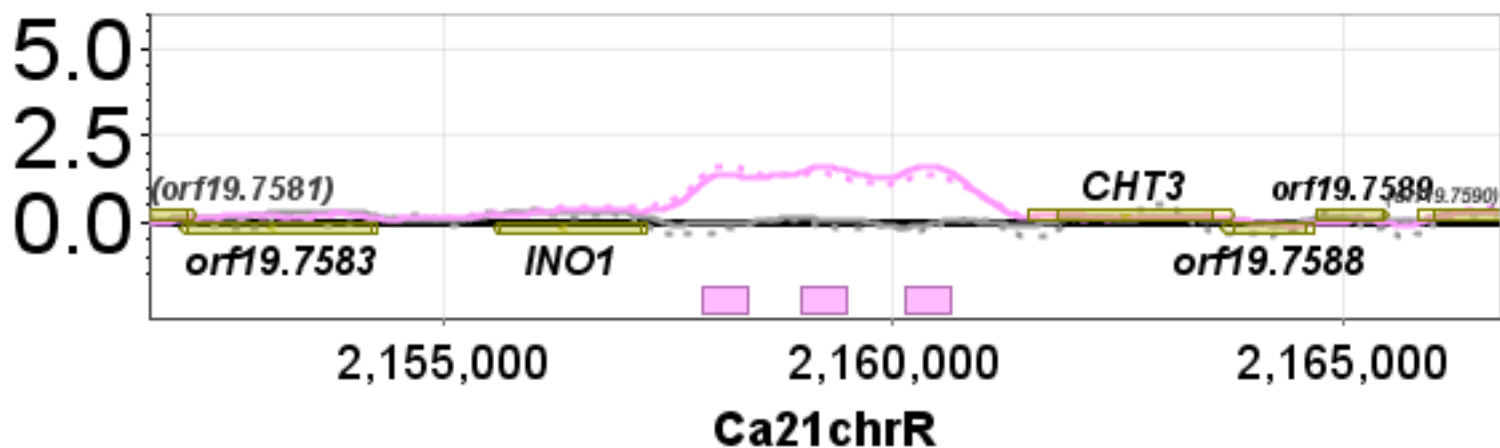

[1.62] Ca21chr1:1226236-1241235 [+] [orf19.2457, orf19.2458, orf19.2459, orf19.2455]

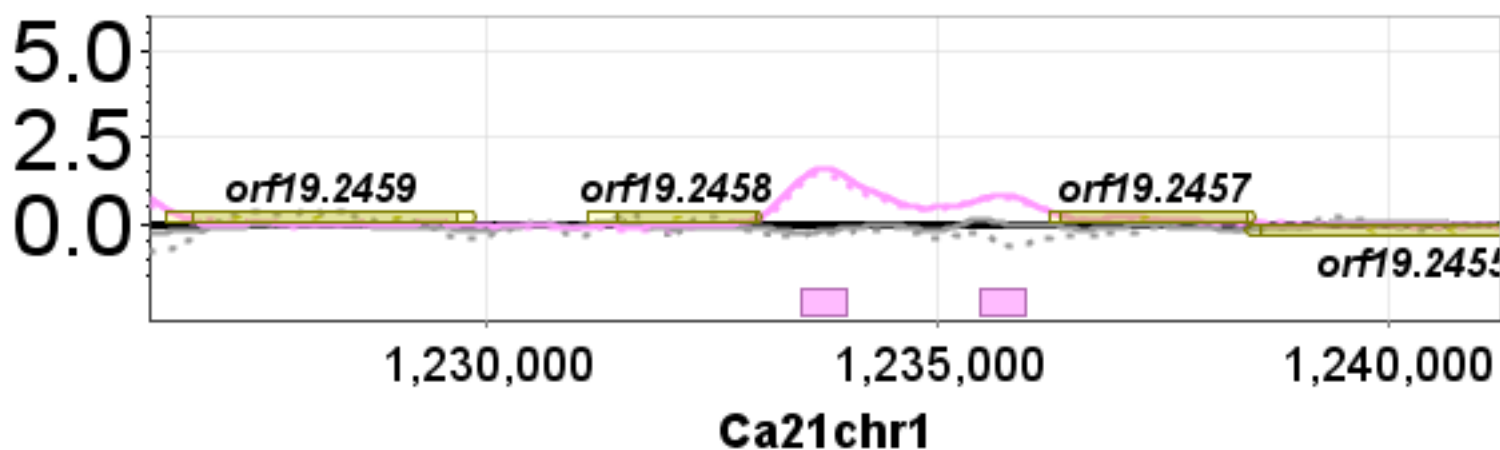



[1.619] Ca21chr5:249580-264579 [+] [ntar\_867, ntar\_866, orf19.1958, orf19.1959, CYC3]

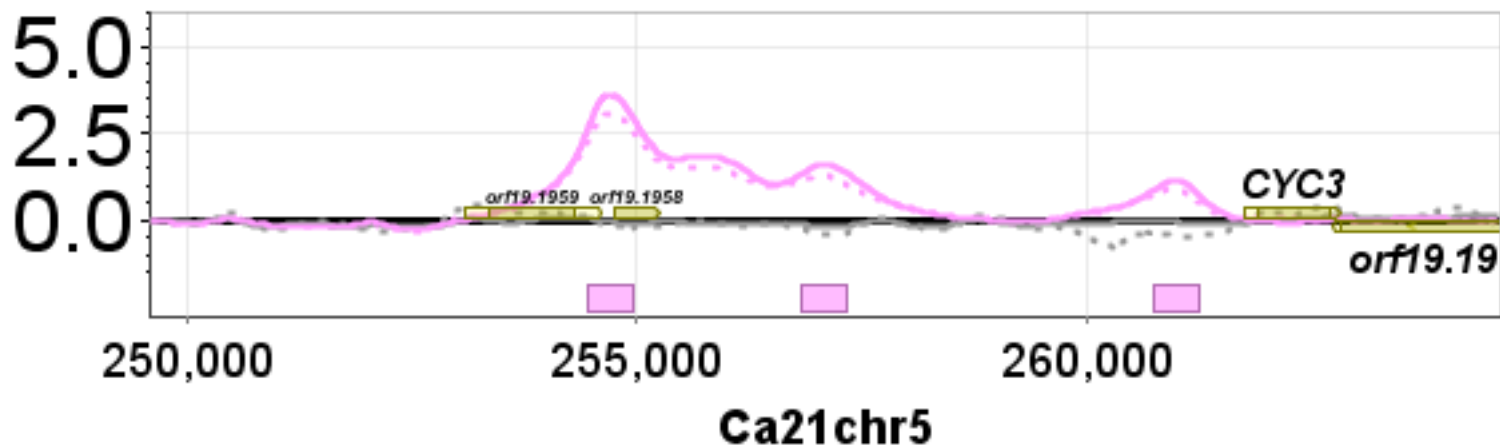

[1.611] Ca21chr1:3103569-3118568 [+] [ntar\_278, RBE1, FTR1, RPL4B, orf19.7216]

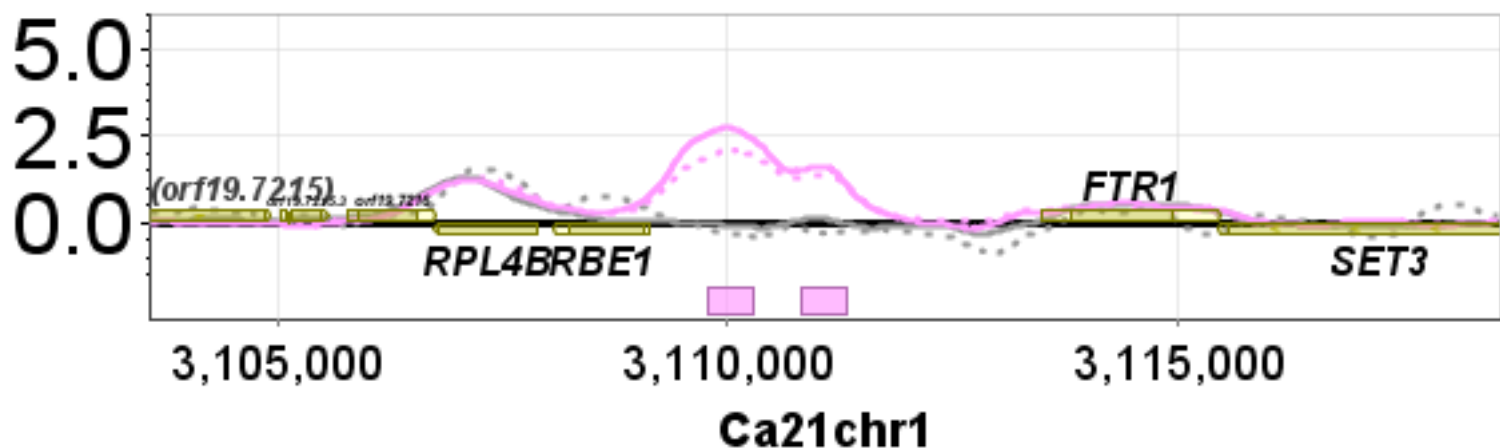

[1.607] Ca21chrR:2152894-2167893 [+] [CHT3, INO1, orf19.7588, orf19.7589, ntar\_1404]

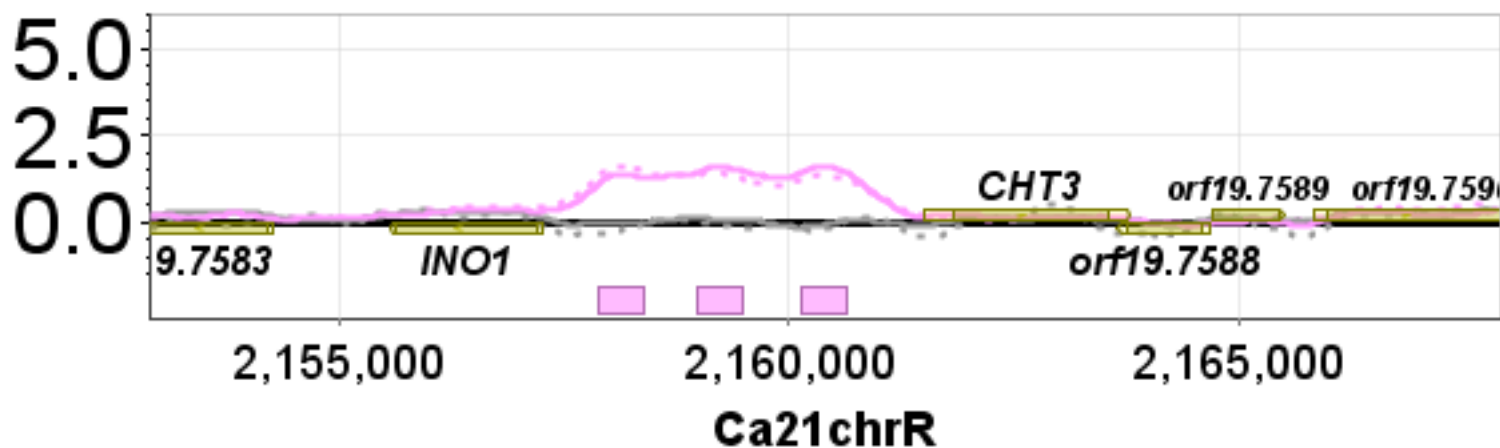

[1.606] Ca21chr1:1067912-1082911 [+] [orf19.4057, orf19.4059, ARO4, GAT2, orf19.4061]

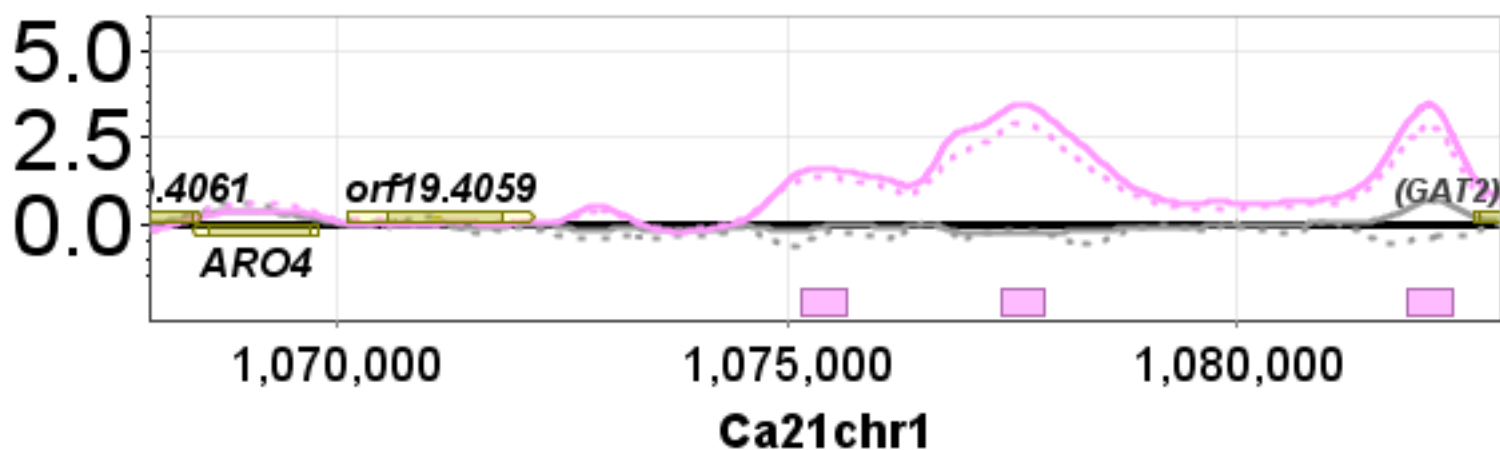

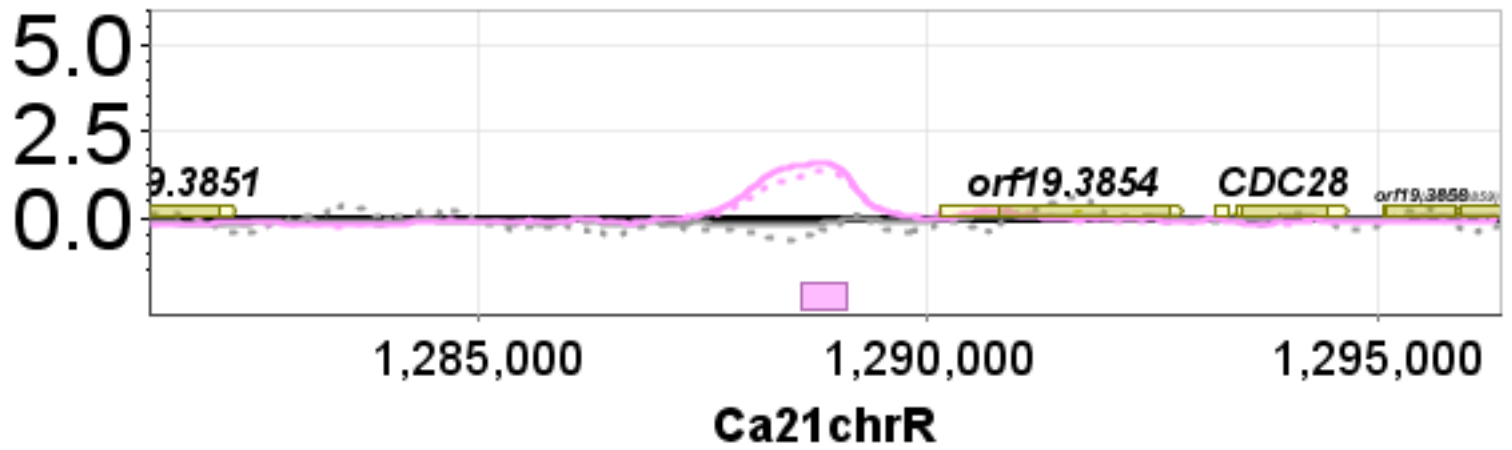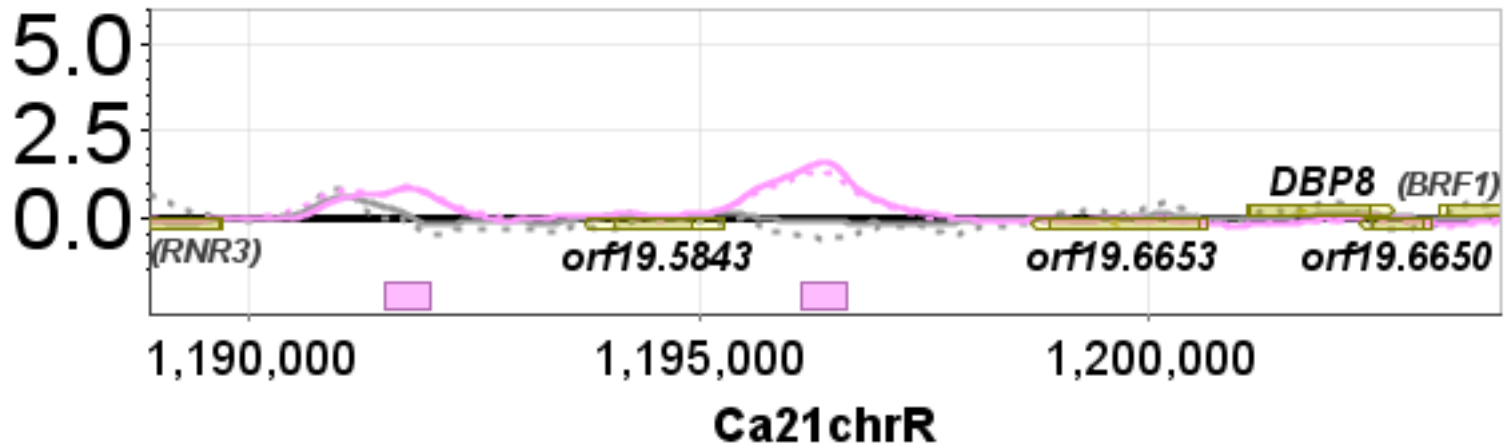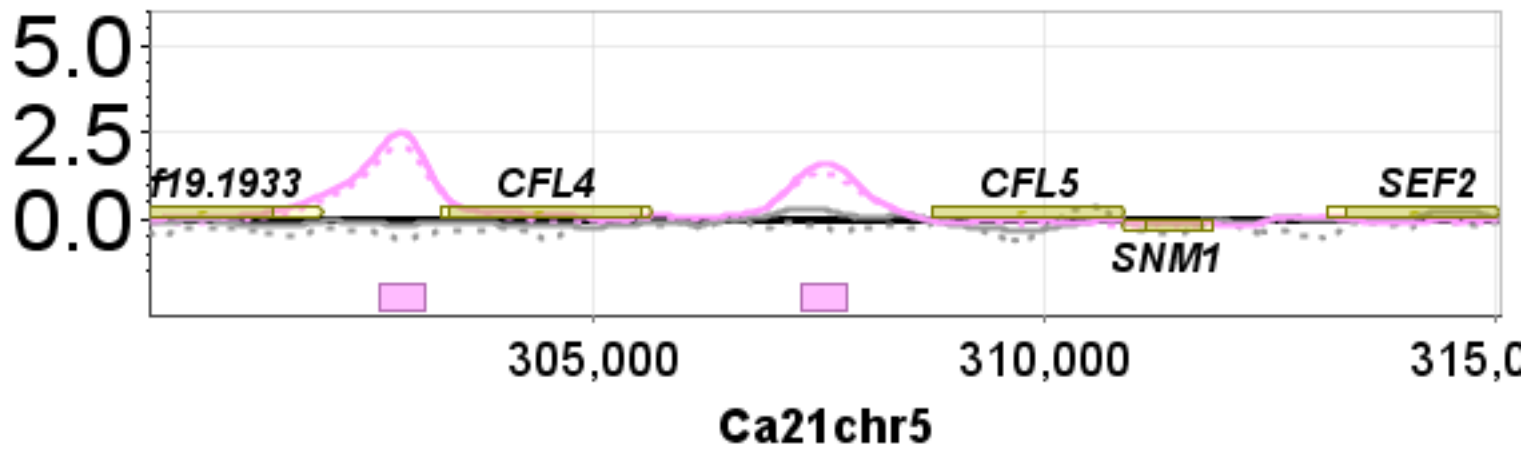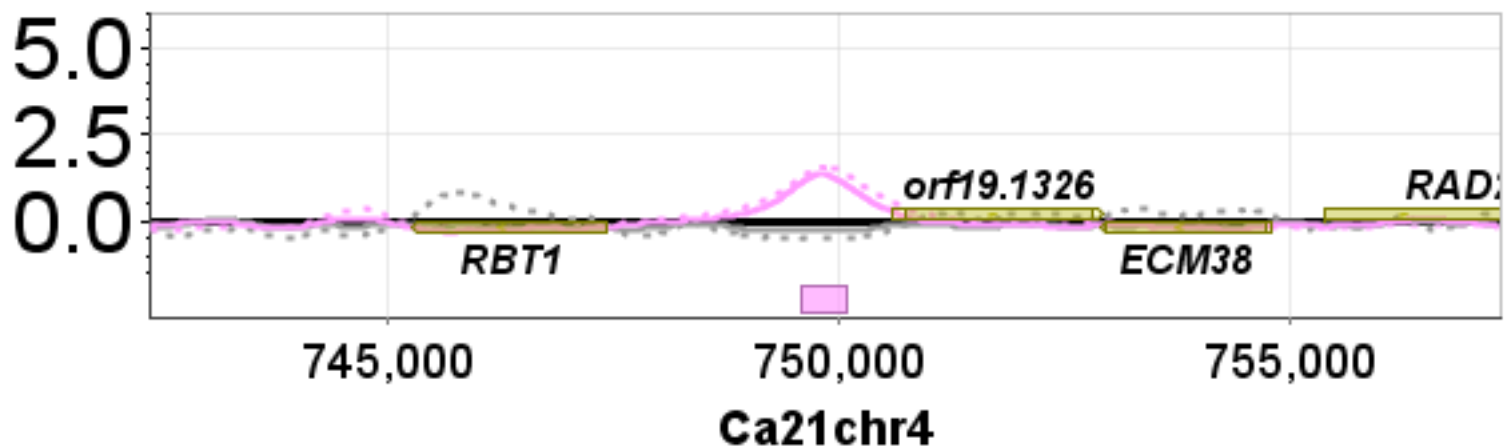

[1.554] Ca21chr2:1927113-1942112 [+] [orf19.1604, ntar\_481, PMS1, orf19.1406, ntar\_482]

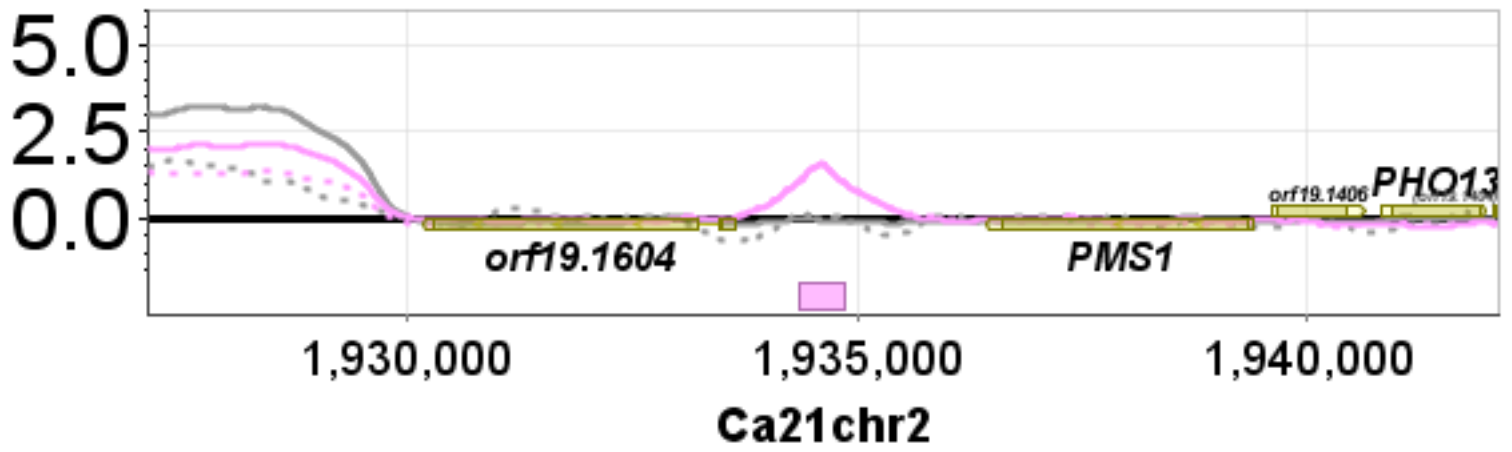

[1.542] Ca21chr4:165459-180458 [+] [ntar\_722, ntar\_723, PTC8, orf19.4699, orf19.4701]

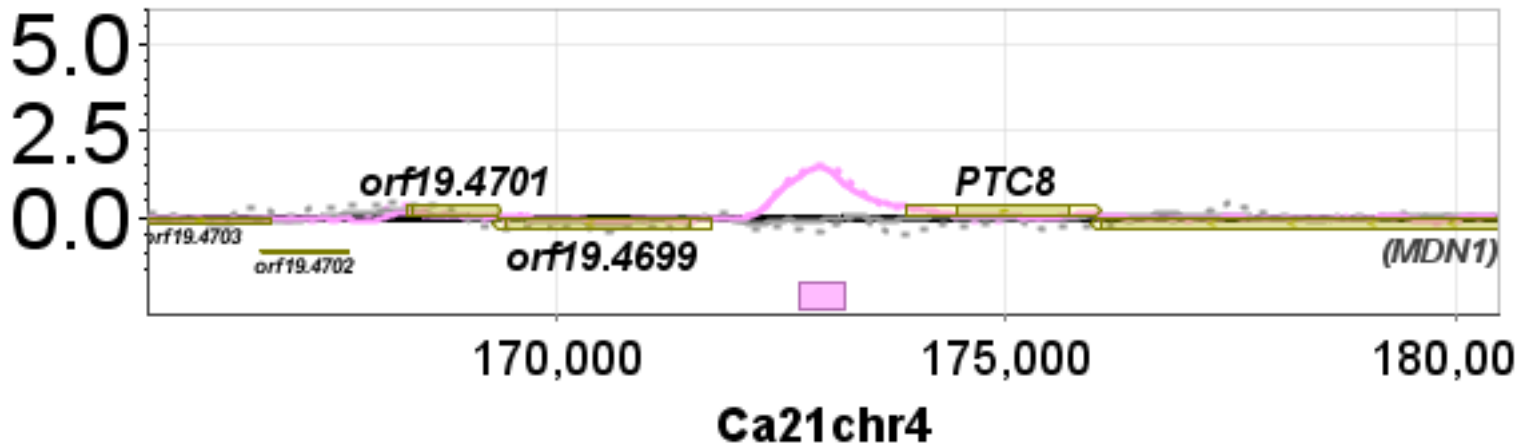

[1.54] Ca21chr5:889586-904585 [+] [orf19.1286, ntar\_940, orf19.1285, orf19.1287, ntar\_939]

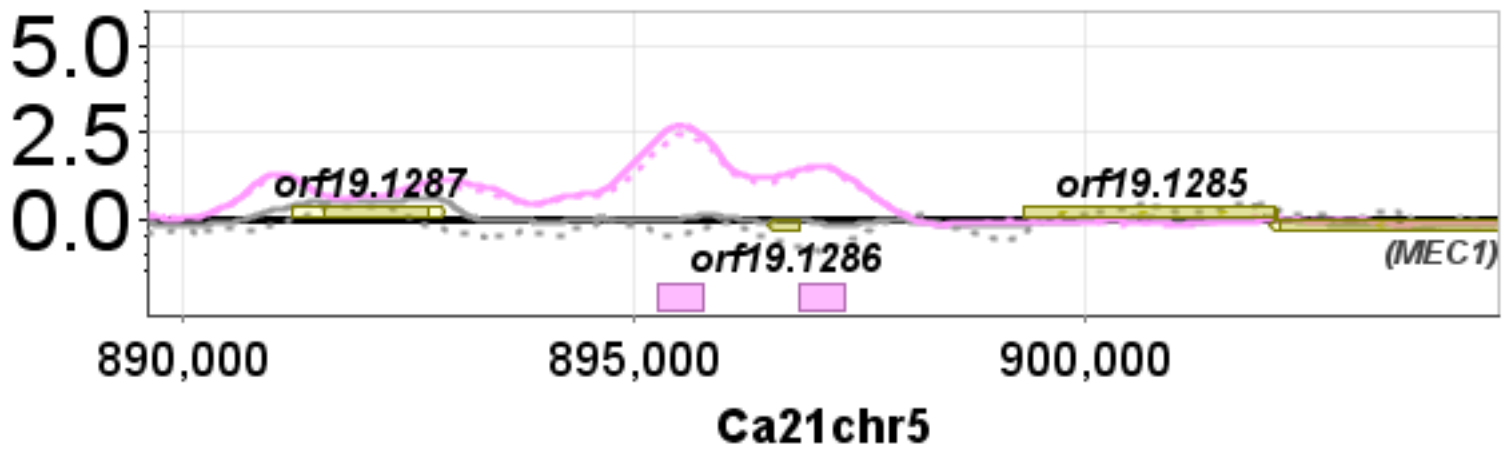

[1.54] Ca21chr7:435723-450722 [+] [ntar\_1101, ntar\_1103, ntar\_1102, HSP90, RAD14]

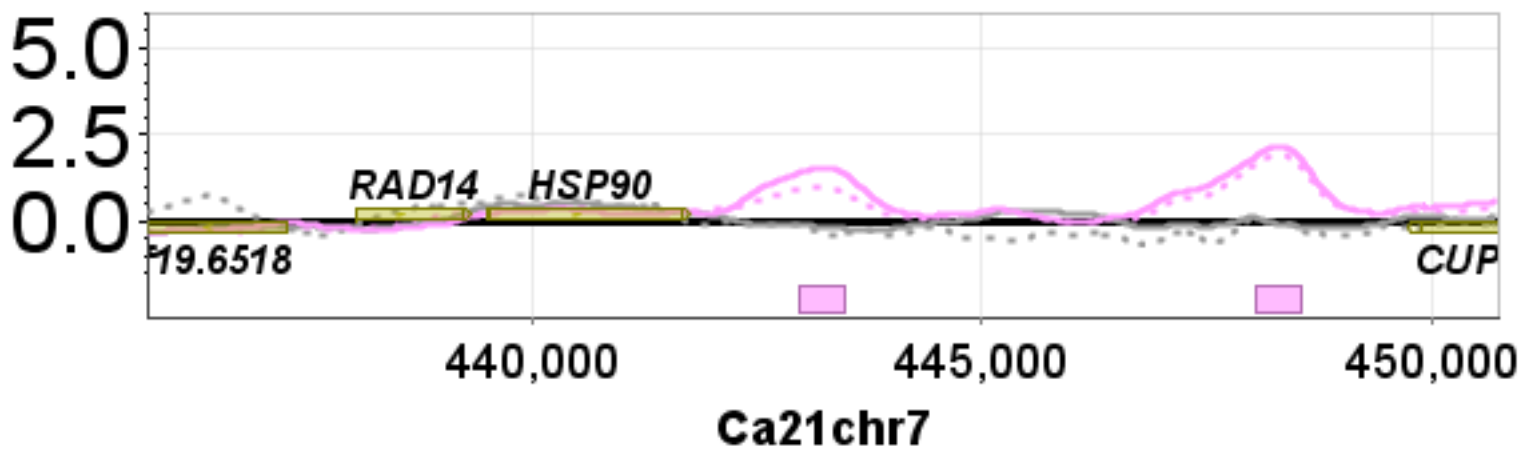

[1.532] Ca21chr1:1324705-1339704 [+] [ntar\_127, orf19.177, orf19.1821]

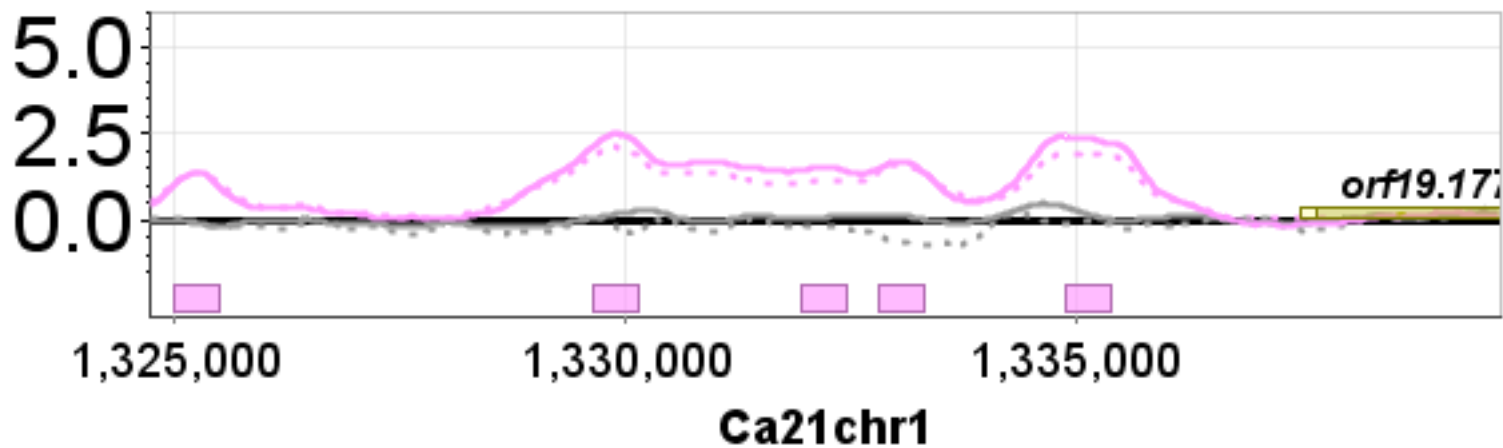

[1.518] Ca21chr6:148016-163015 [+] [SUN41, orf19.3643, CAN3]

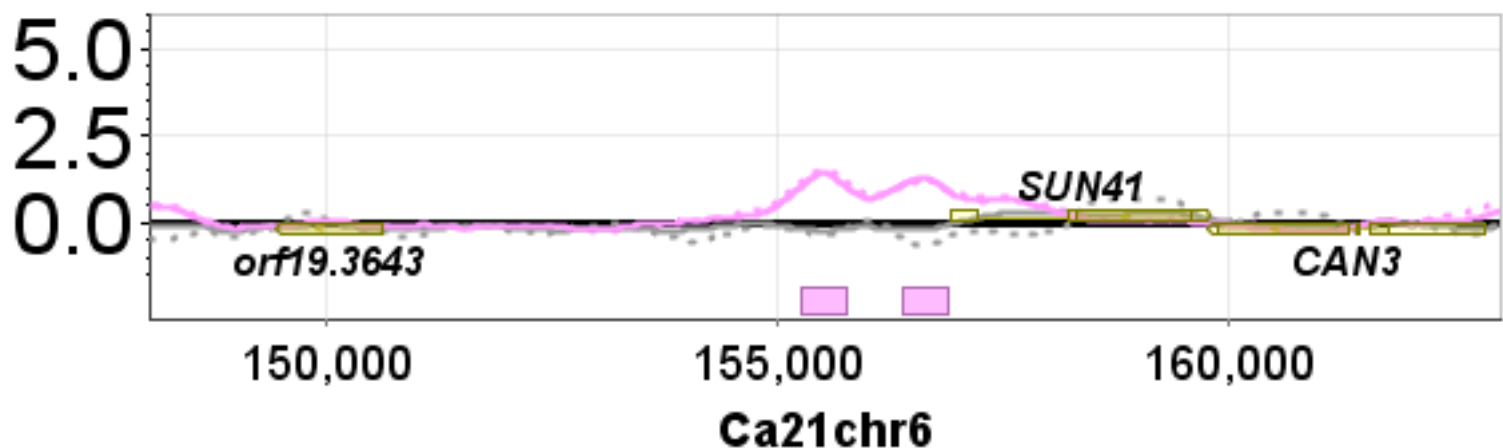

[1.517] Ca21chr2:1800020-1815019 [+] [BUD20, orf19.217, orf19.216.1, PIR1, orf19.216]

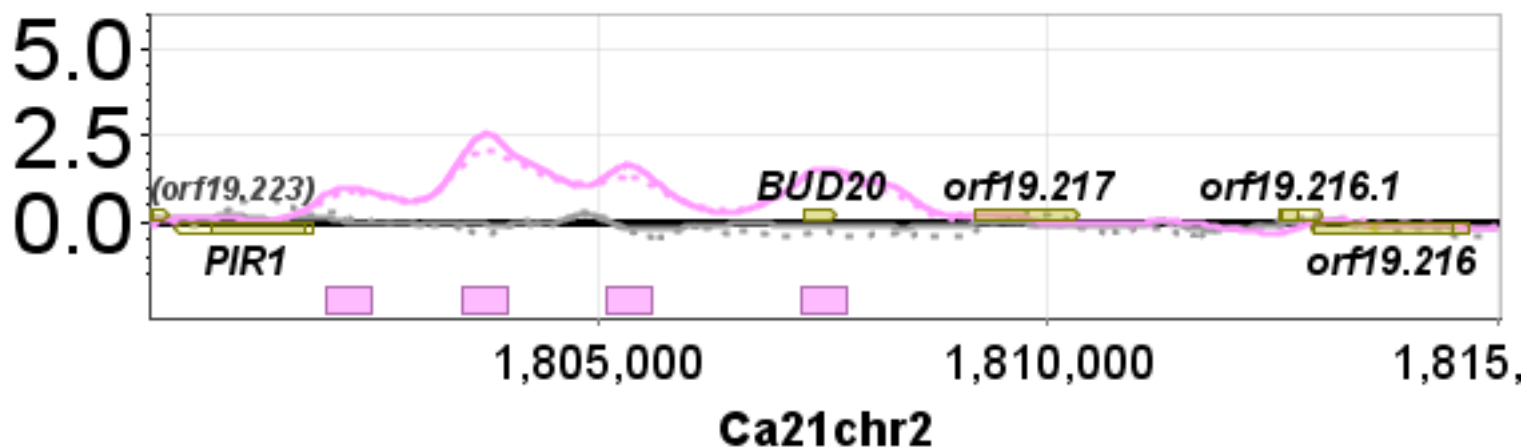

[1.491] Ca21chr1:2931791-2946790 [+] [orf19.4972, HYR1, orf19.4970]

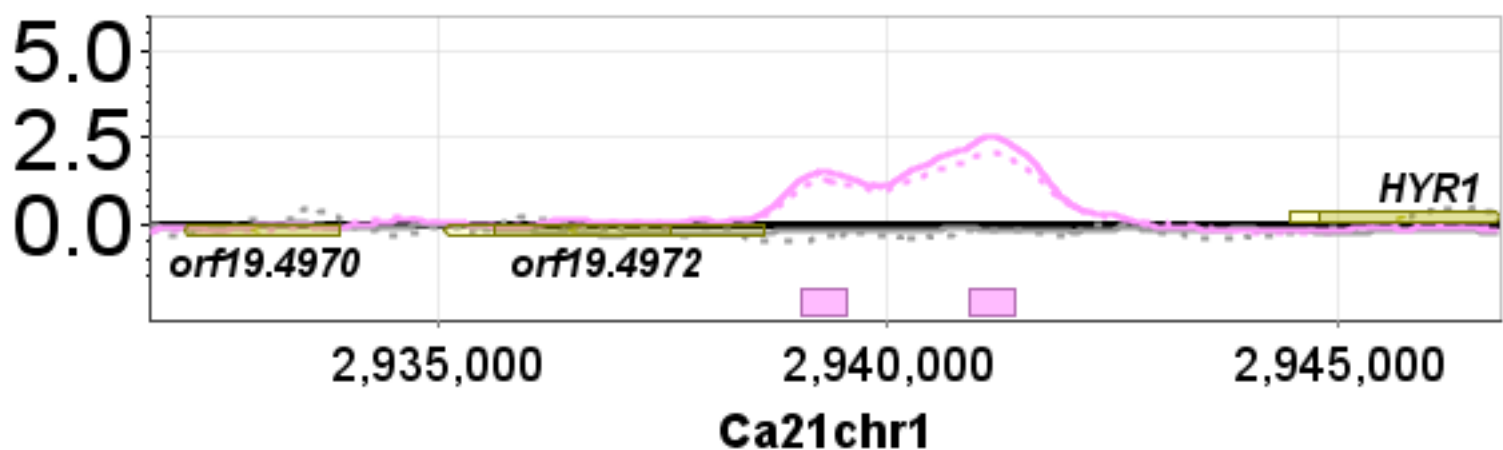

[1.48] Ca21chr3:1585004-1600003 [+] [orf19.6805, ntar\_667, ty(gua)3, orf19.6804, ntar\_666]

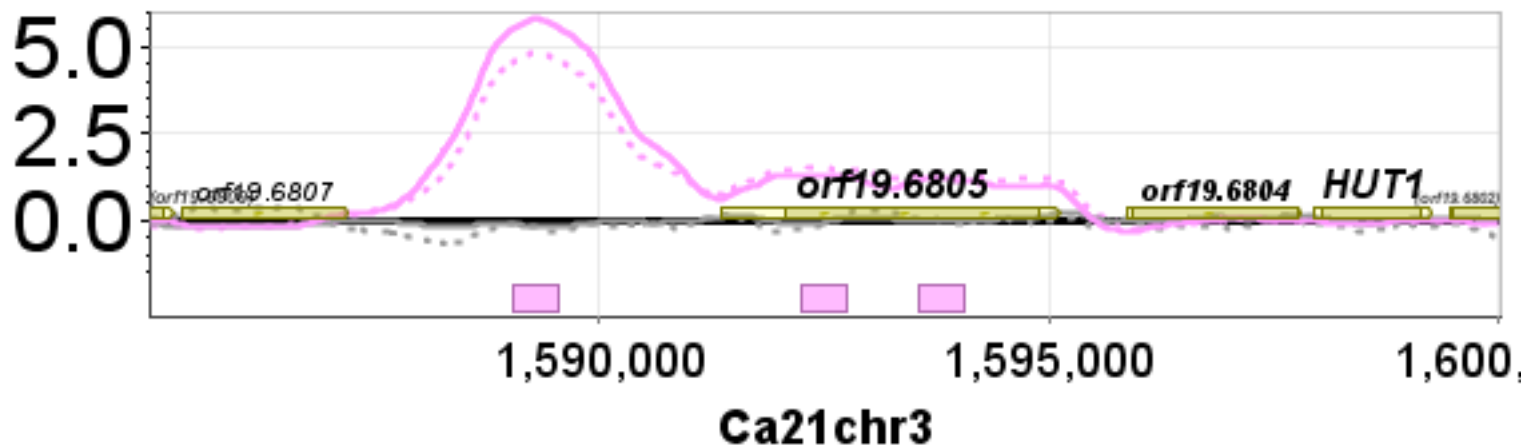

[1.479] Ca21chrR:1367258-1382257 [+] [orf19.721, BCR1, GST3, orf19.719, orf19.725]

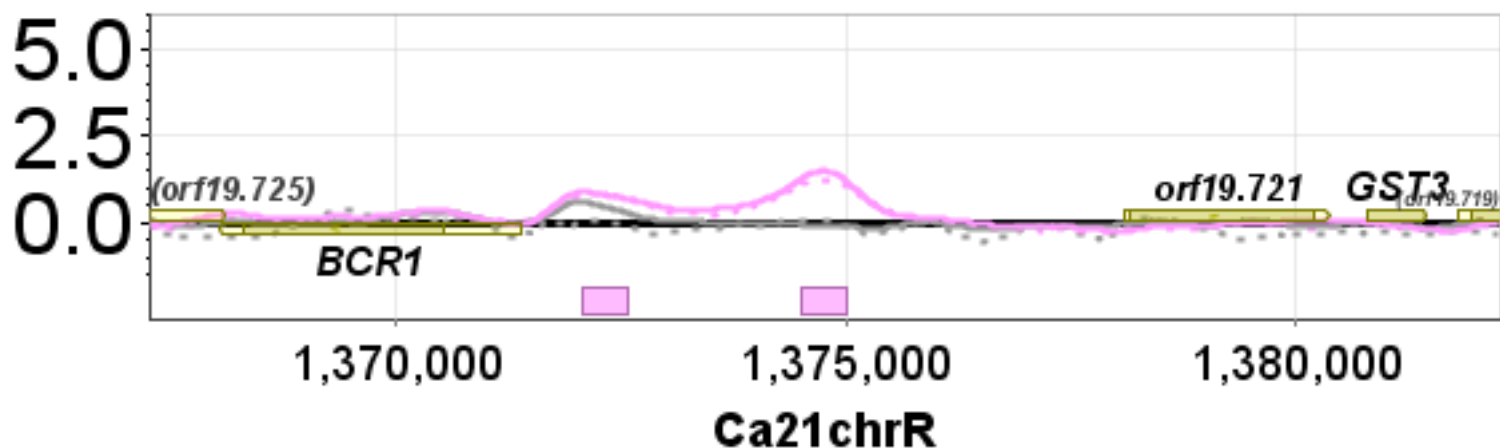

[1.472] Ca21chrR:2109781-2124780 [+] [DPB2, GNP3, BET2, orf19.7566]

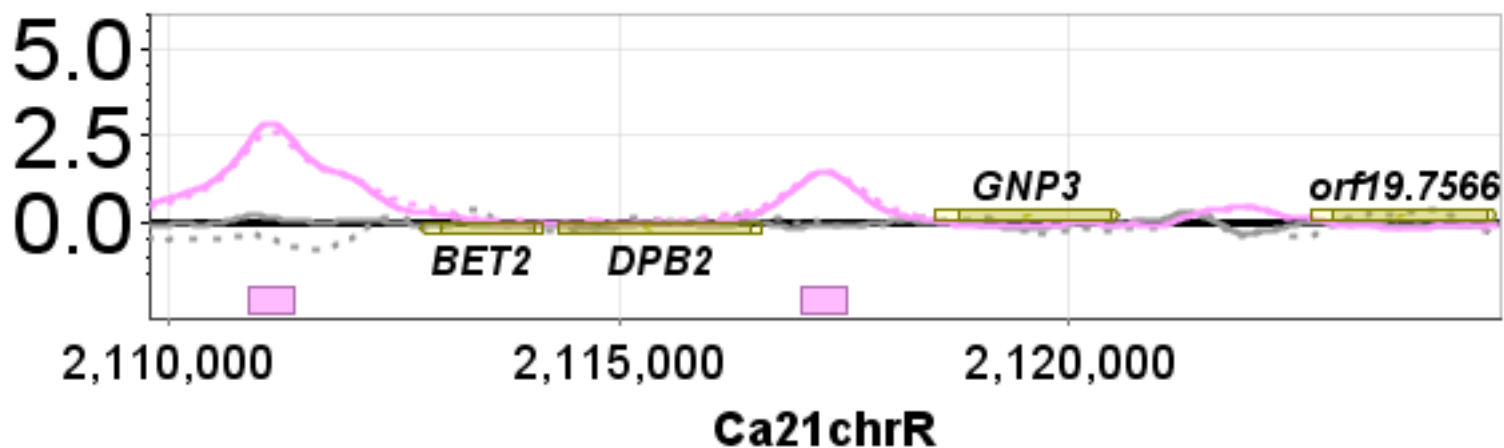

[1.47] Ca21chr1:2093683-2108682 [+] [ntar\_197, orf19.4818, orf19.4819, RAM2, ntar\_198]

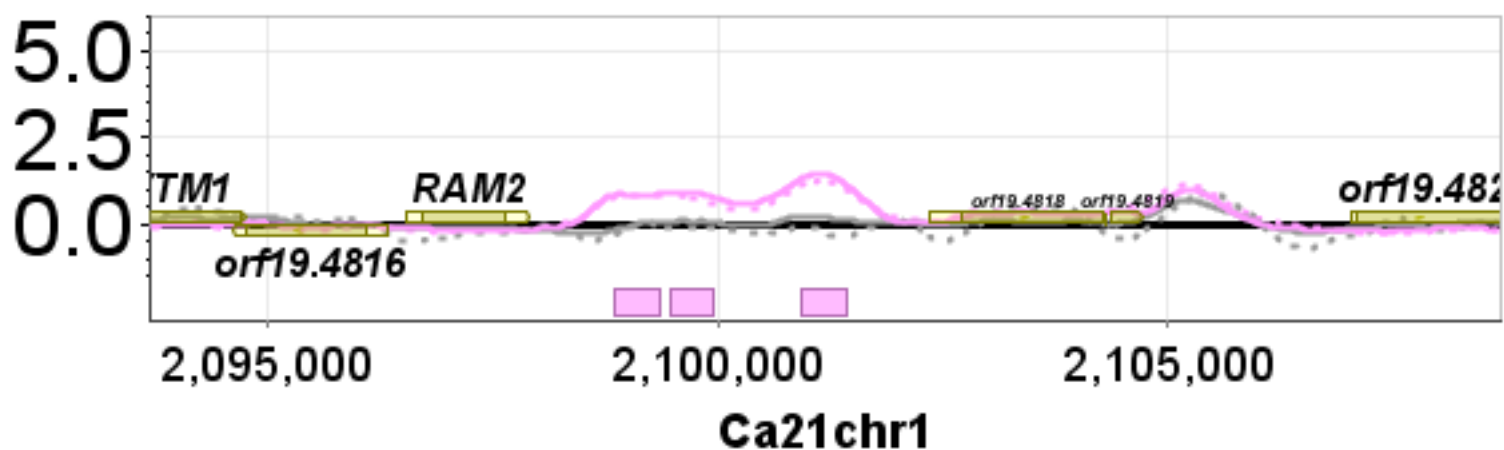

[1.465] Ca21chr5:1043797-1058796 [+] [orf19.3968, orf19.3969, orf19.3970, PFK1]

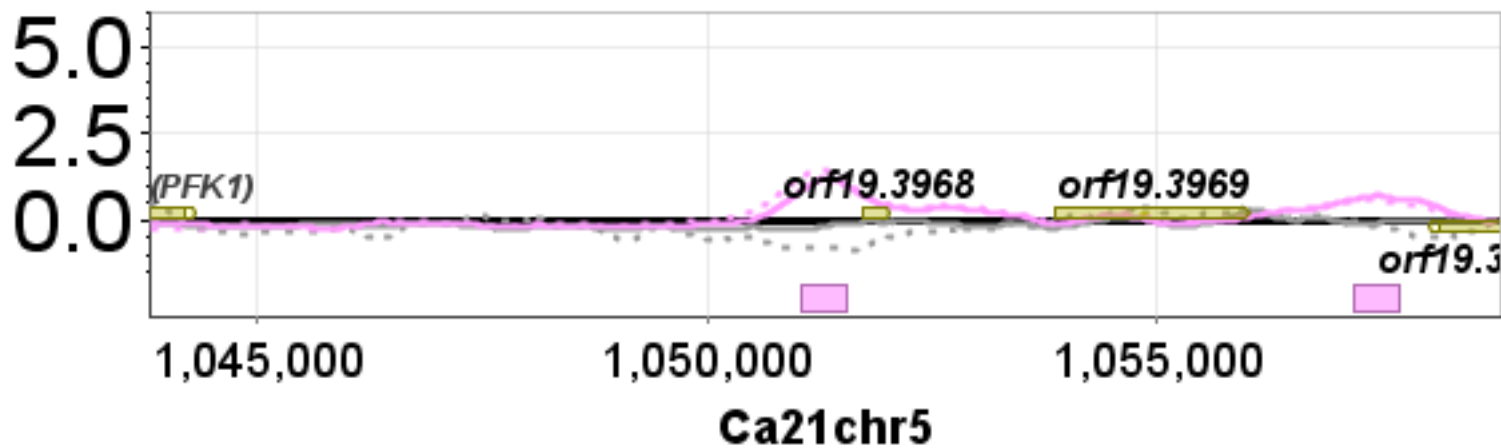

[1.437] Ca21chr5:1110019-1125018 [+] [orf19.4000, orf19.4001, DUN1, orf19.3999]

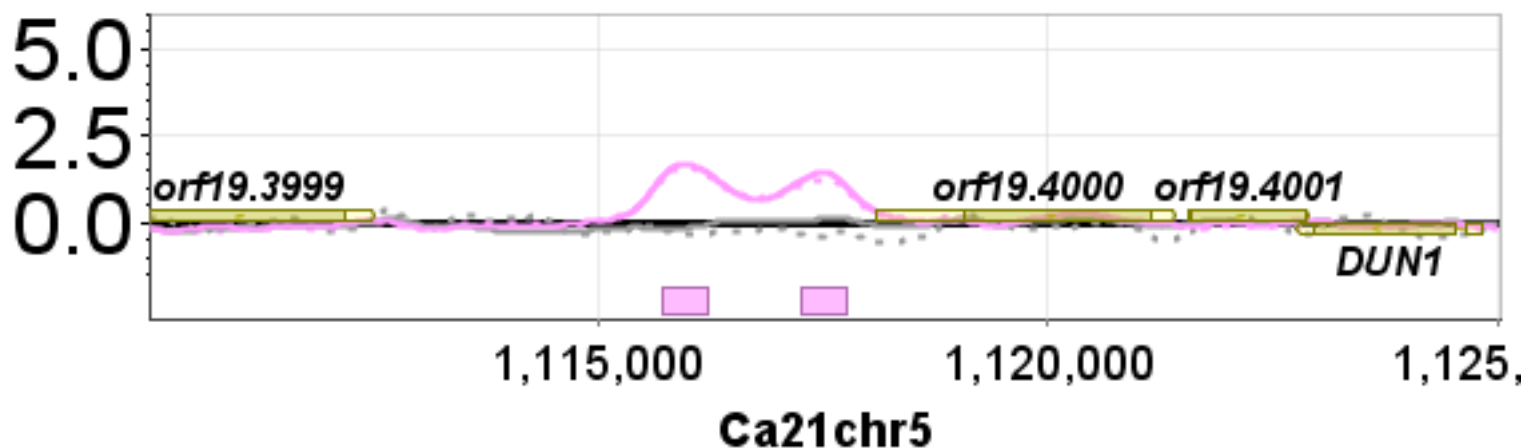

[1.426] Ca21chr5:492845-507844 [+] [ntar\_890, PTH2, PTH1, THR4, orf19.4234]

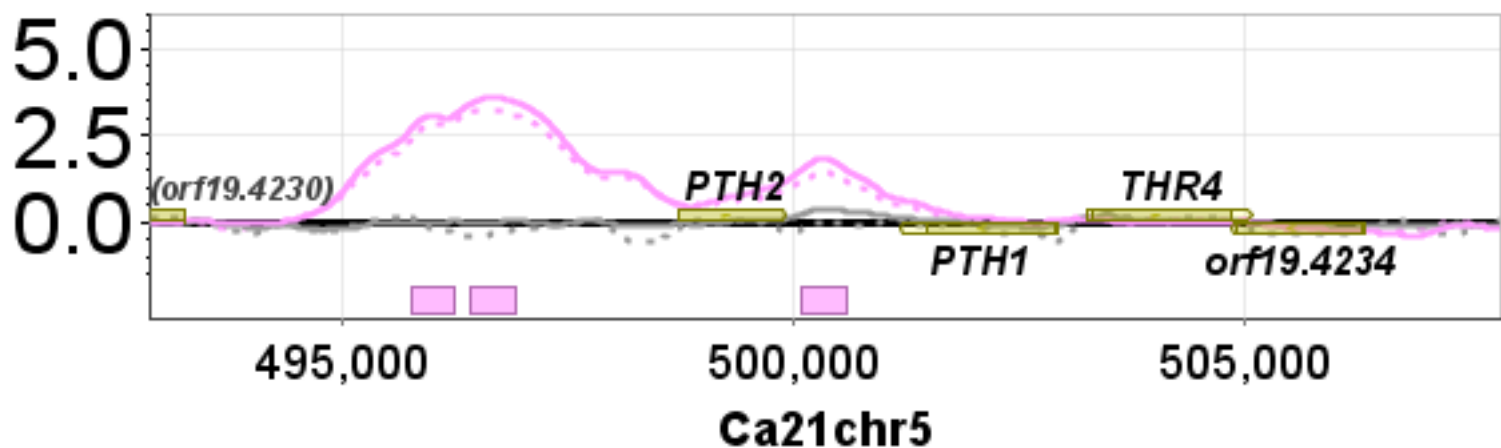

[1.424] Ca21chr3:1465389-1480388 [+] [th(gug)3, ntar\_658, ntar\_659, AAF1, GLG2]

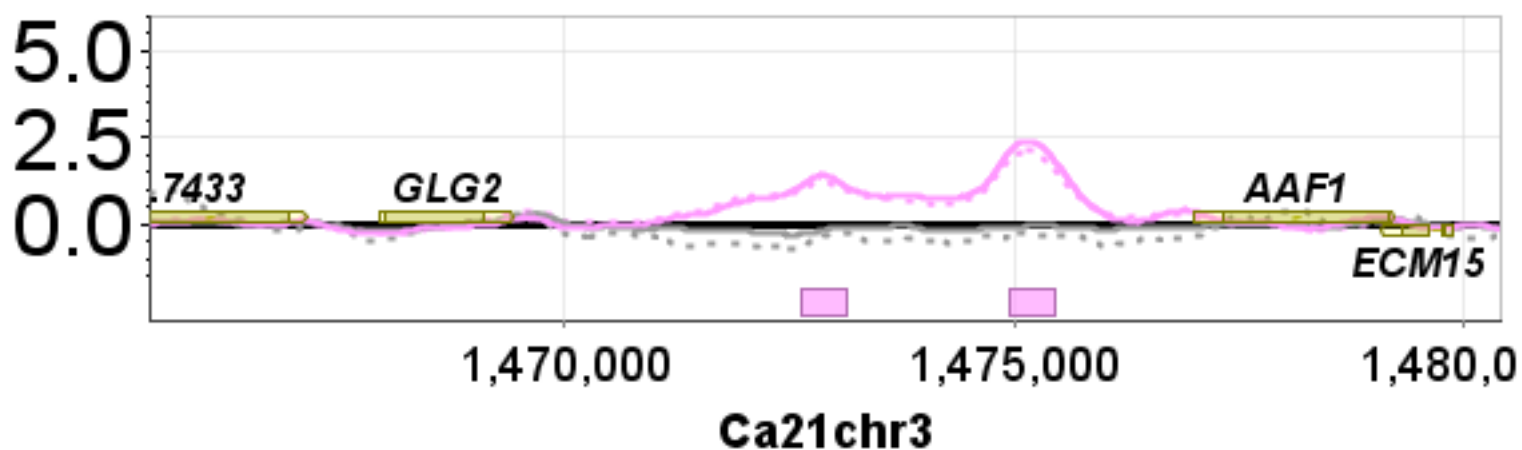

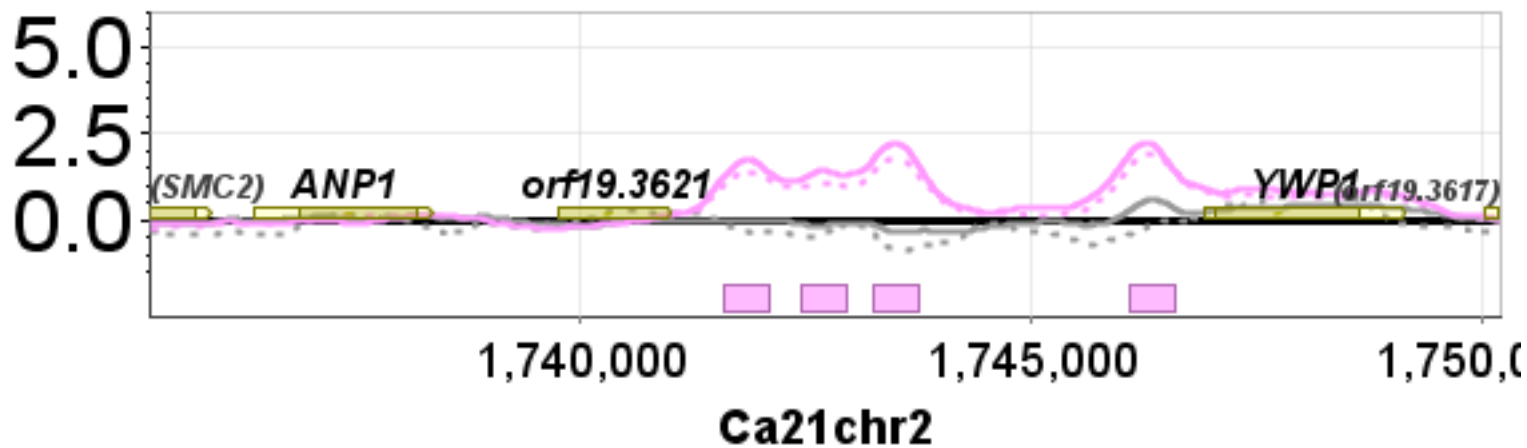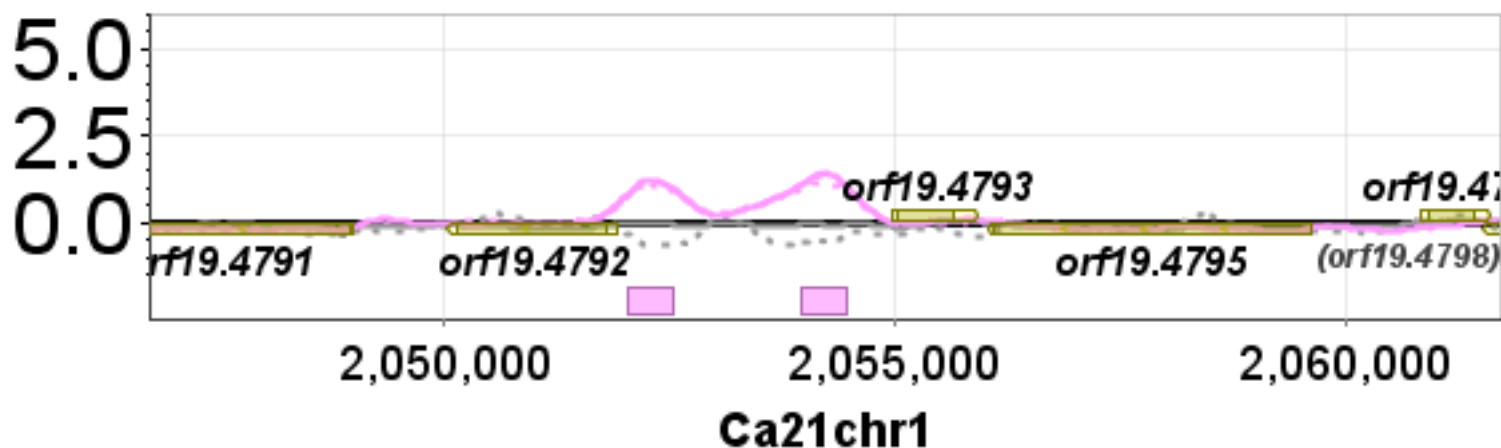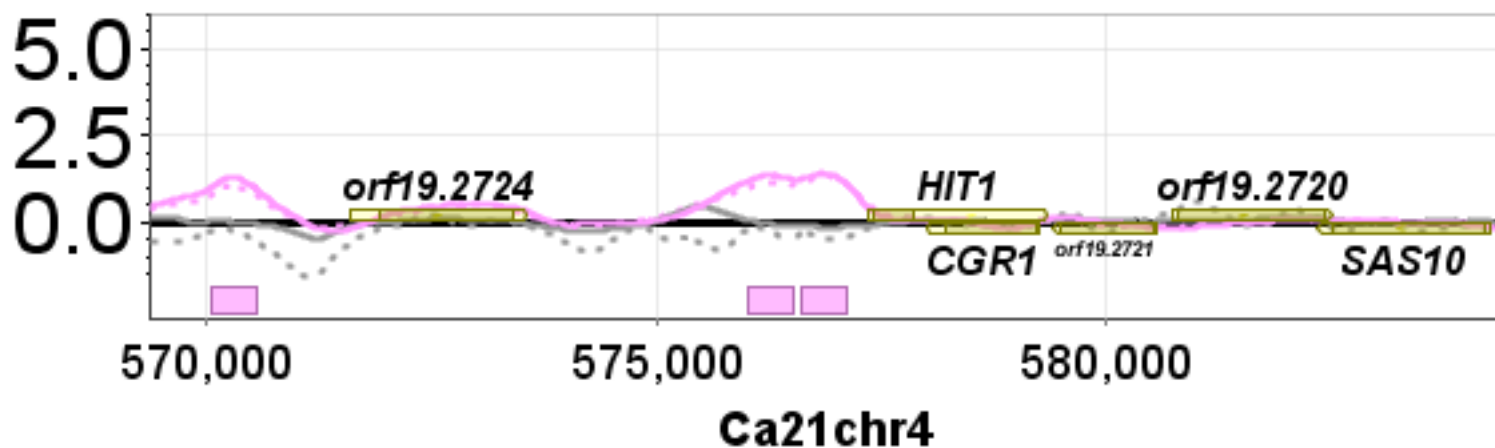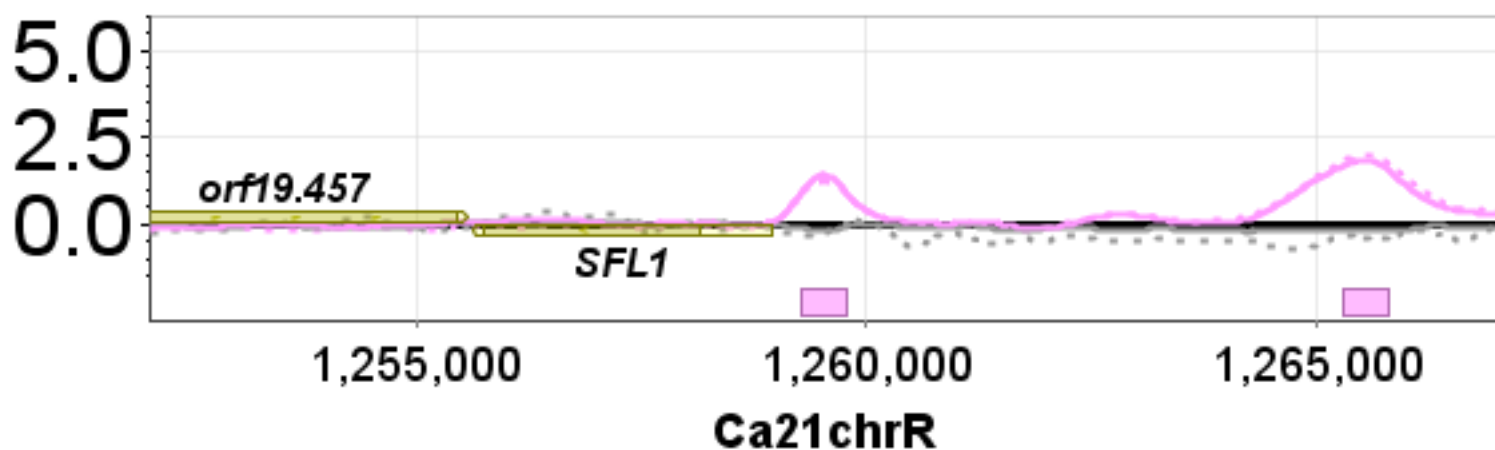

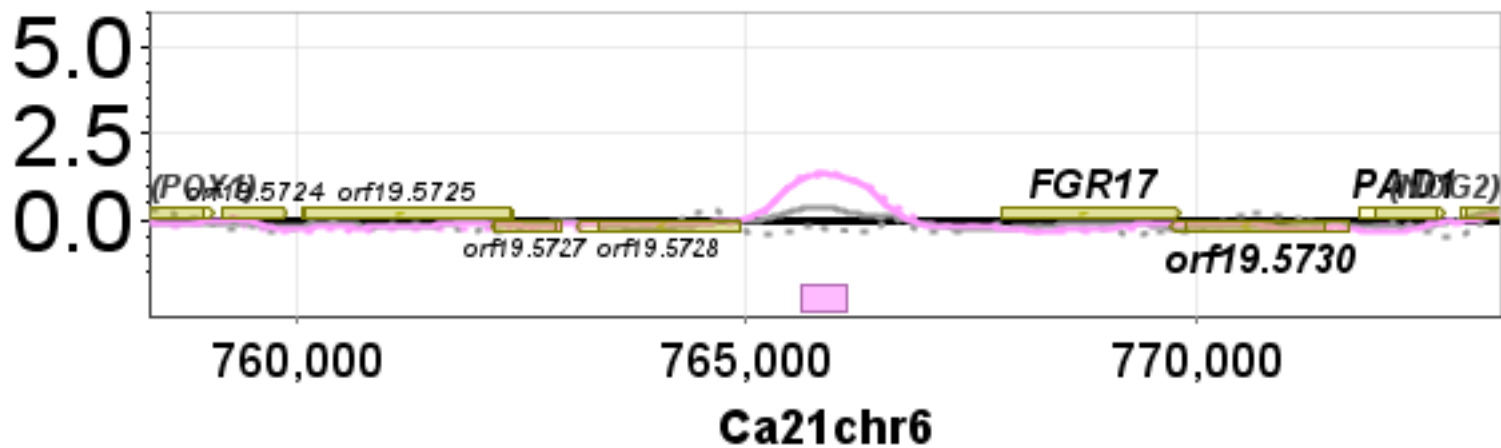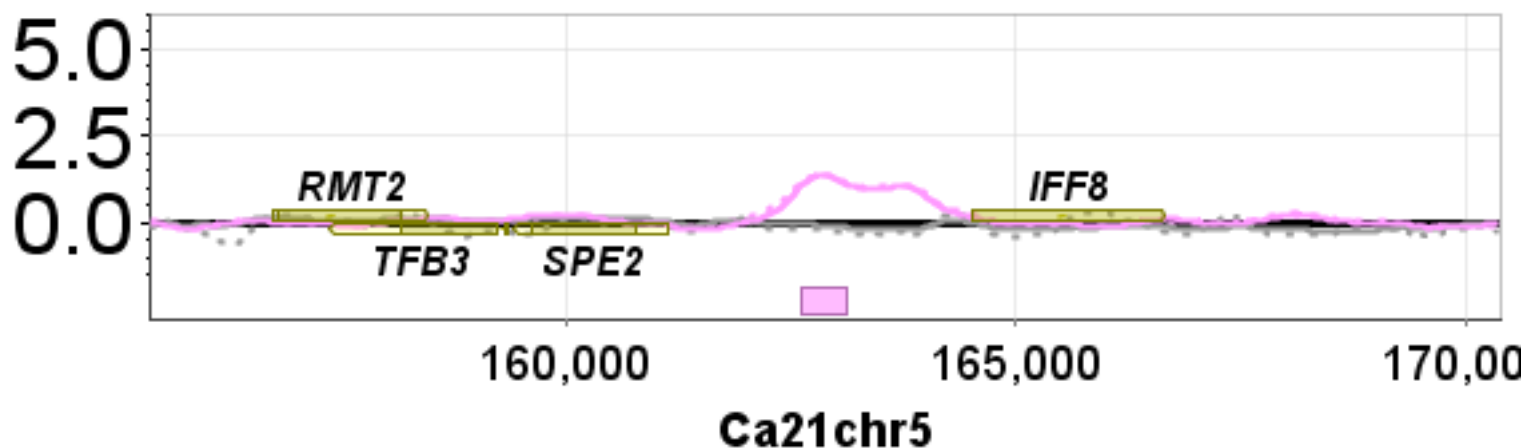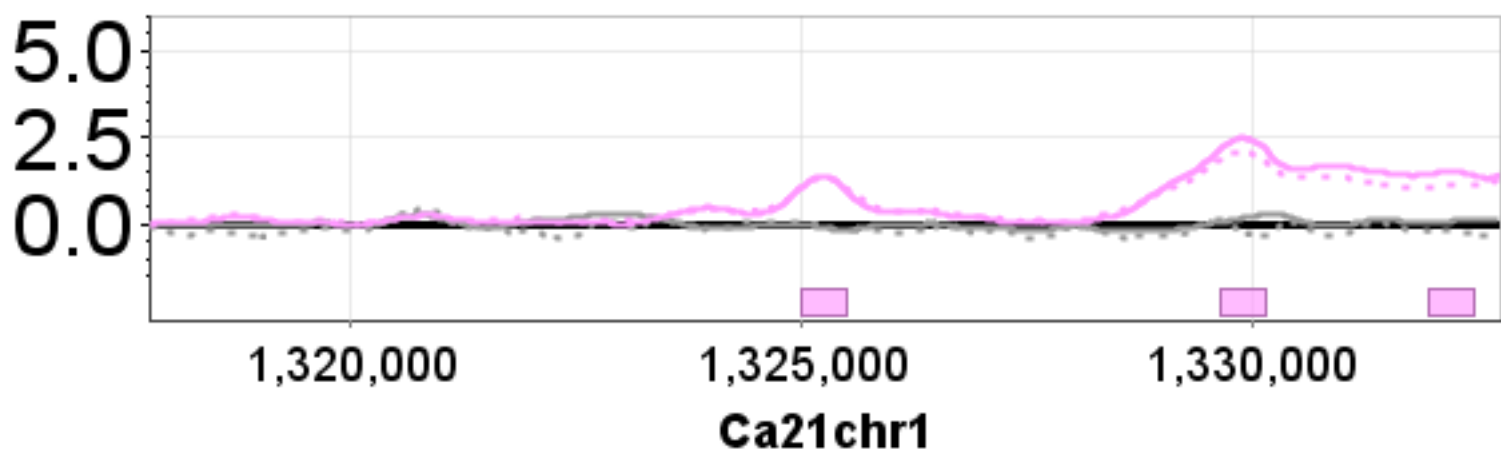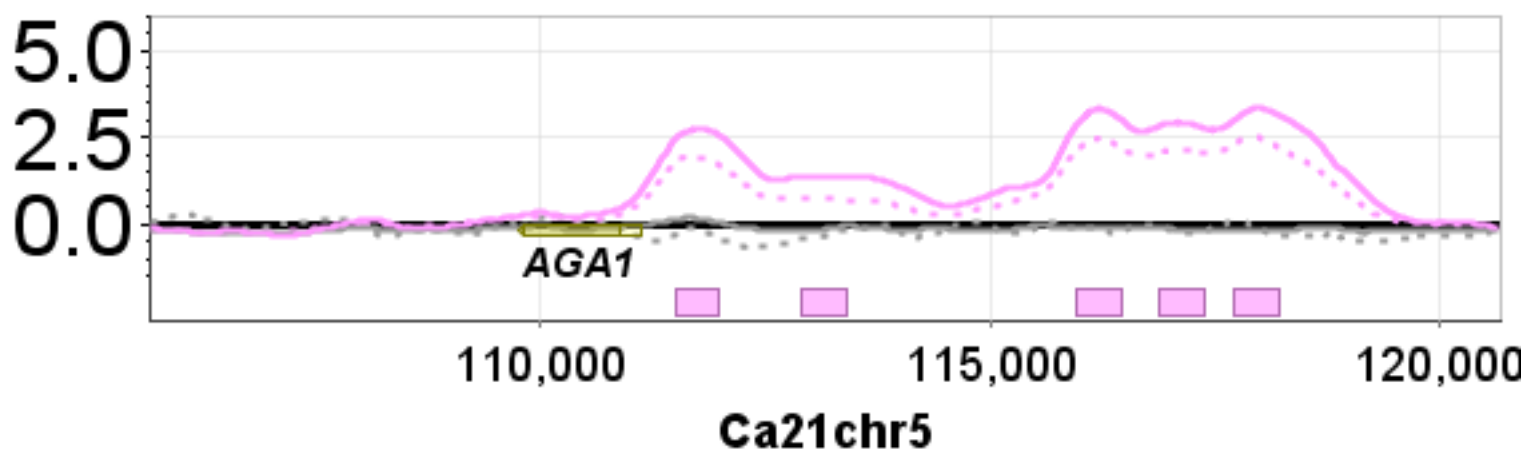



[1.362] Ca21chr2:1309247-1324246 [+] [RTA2, ntar\_400, RTA3, orf19.25, orf19.26]

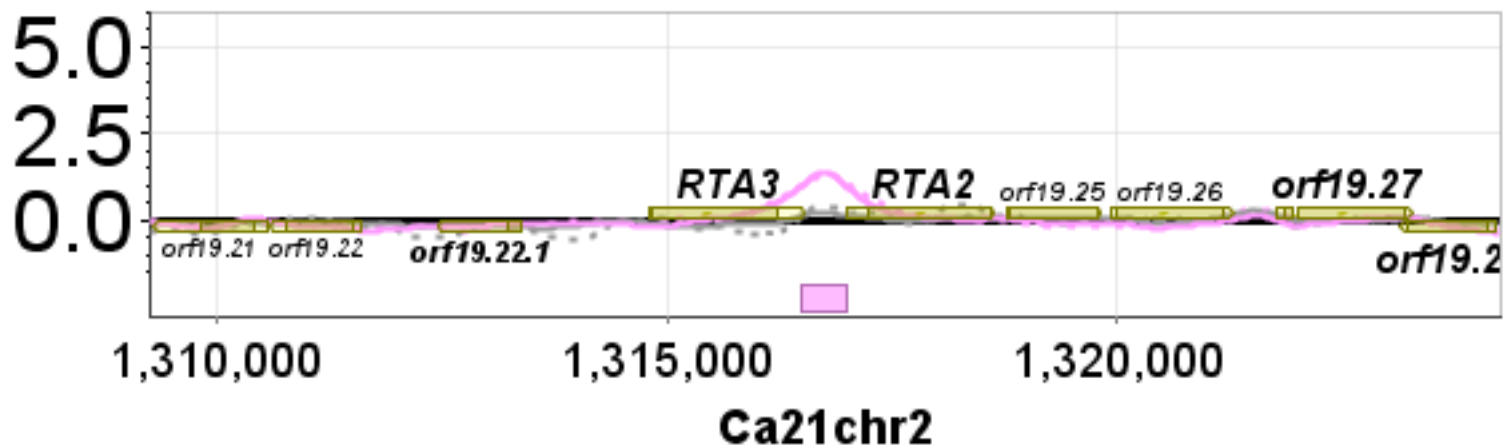

[1.361] Ca21chr5:700990-715989 [+] [ntar\_915, ntar\_914, orf19.4347, orf19.4346, ntar\_916]

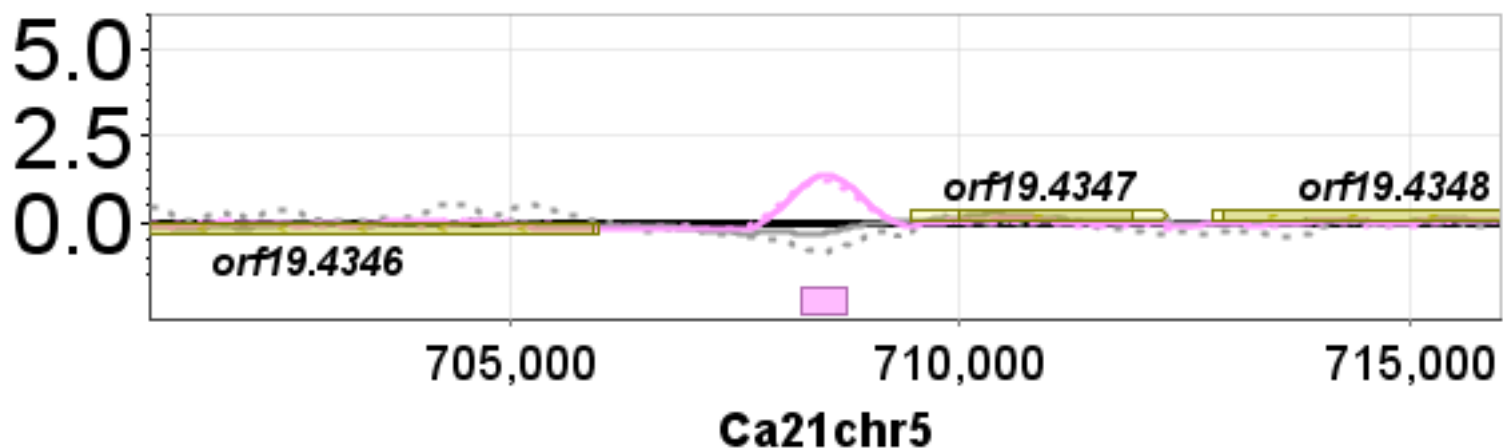

[1.36] Ca21chr3:1586307-1601306 [+] [ty(gua)3, orf19.6804, orf19.6805, ntar\_667, HUT1]

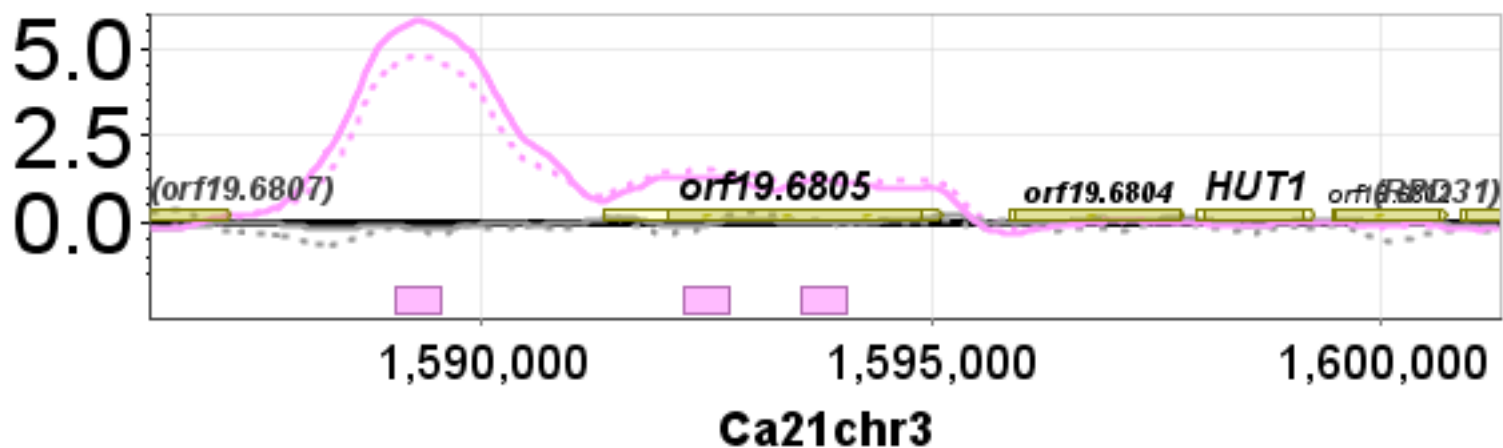

[1.339] Ca21chr4:568782-583781 [+] [HIT1, ntar\_770, CGR1, orf19.2721, orf19.2720]

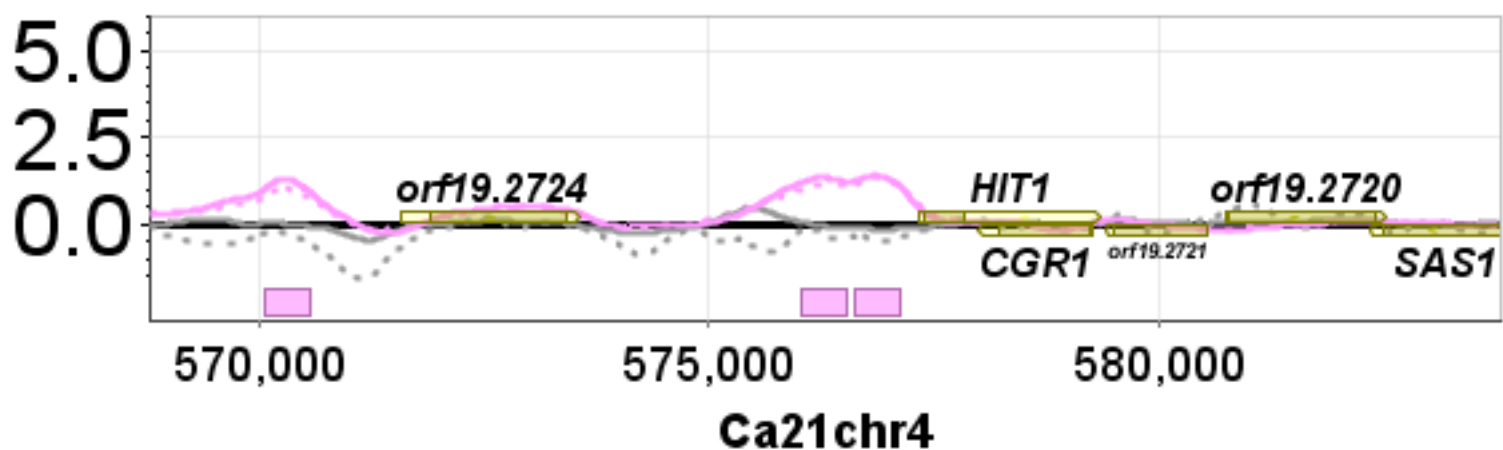

[1.303] Ca21chr4:562814-577813 [+] [orf19.2724, orf19.2725, ntar\_770, HIT1]

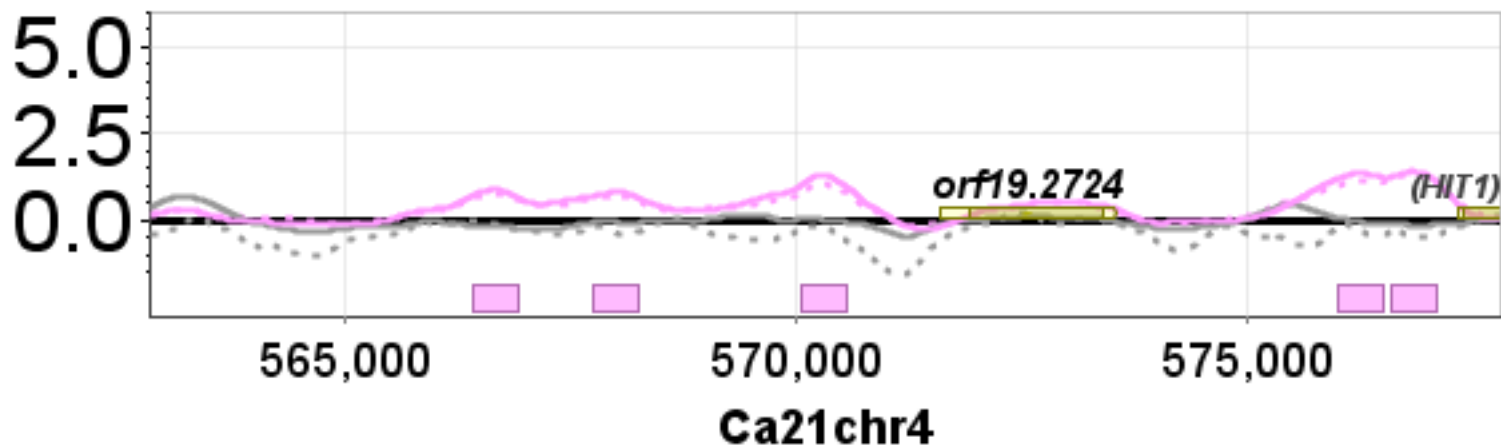

[1.29] Ca21chrR:44485-59484 [+] [orf19.7513, orf19.7512, PCK1, ntar\_1158, orf19.7511]

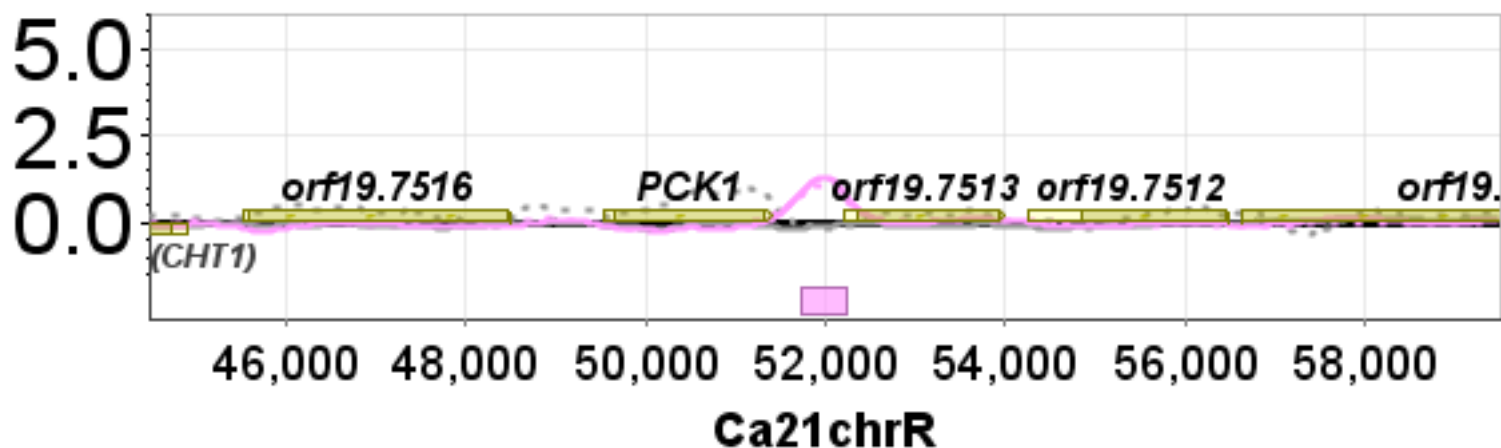

[1.277] Ca21chrR:874149-889148 [+] [ntar\_1253, ntar\_1254, ntar\_1255, HST7, ntar\_1256]

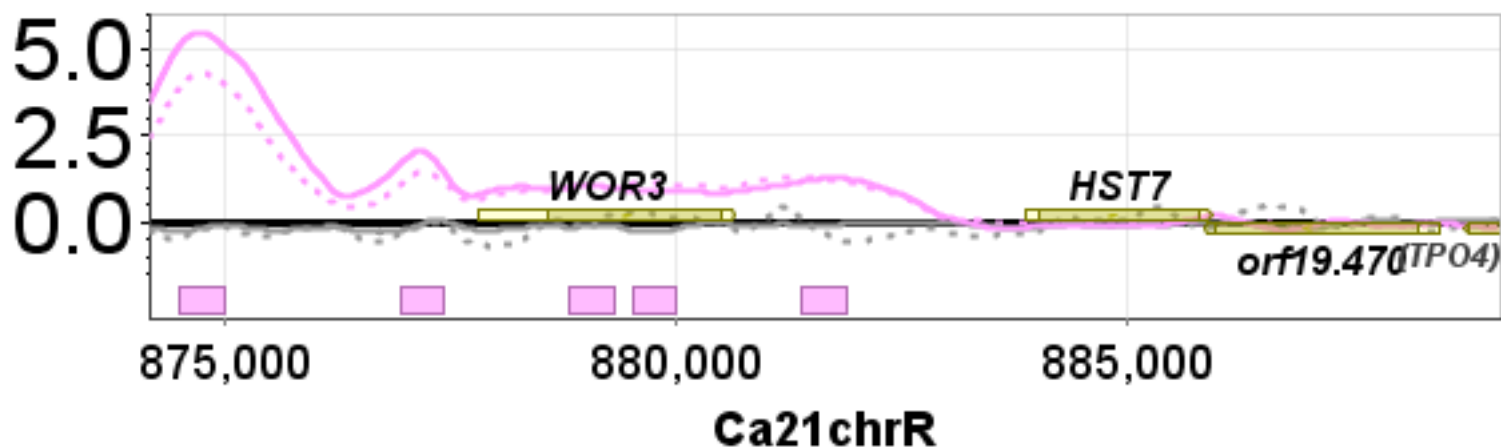

[1.277] Ca21chrR:1682109-1697108 [+] [YHB1, ntar\_1348, SAP2, ntar\_1347, ntar\_1349]

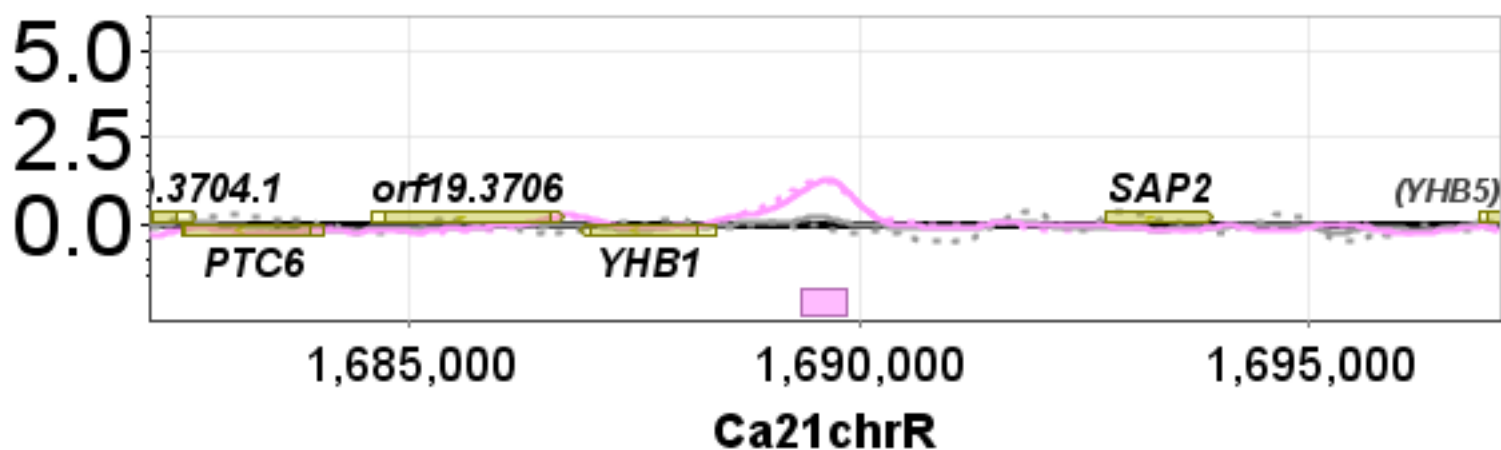

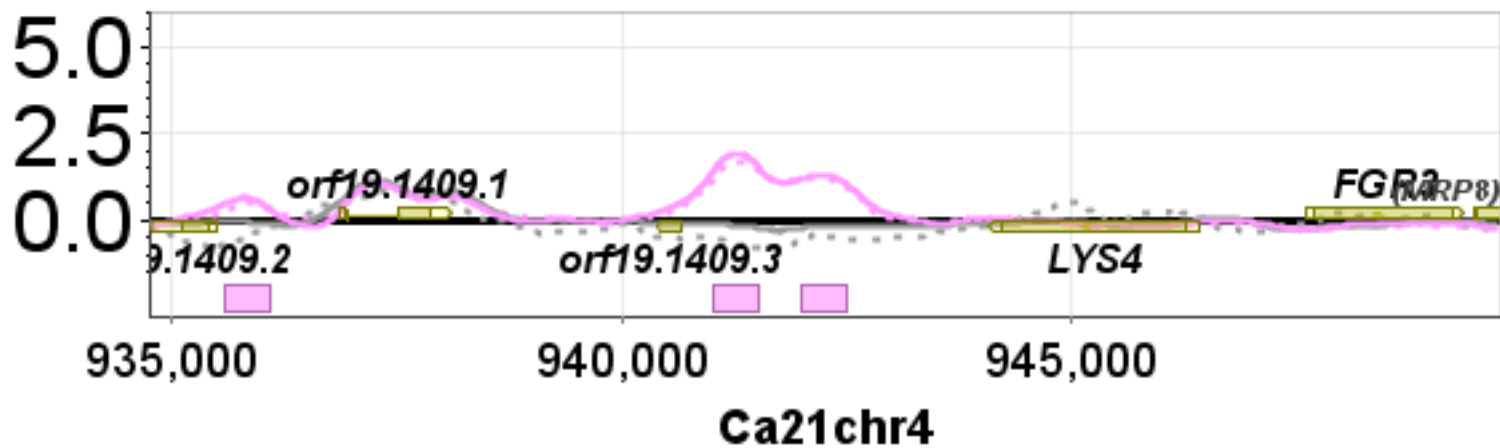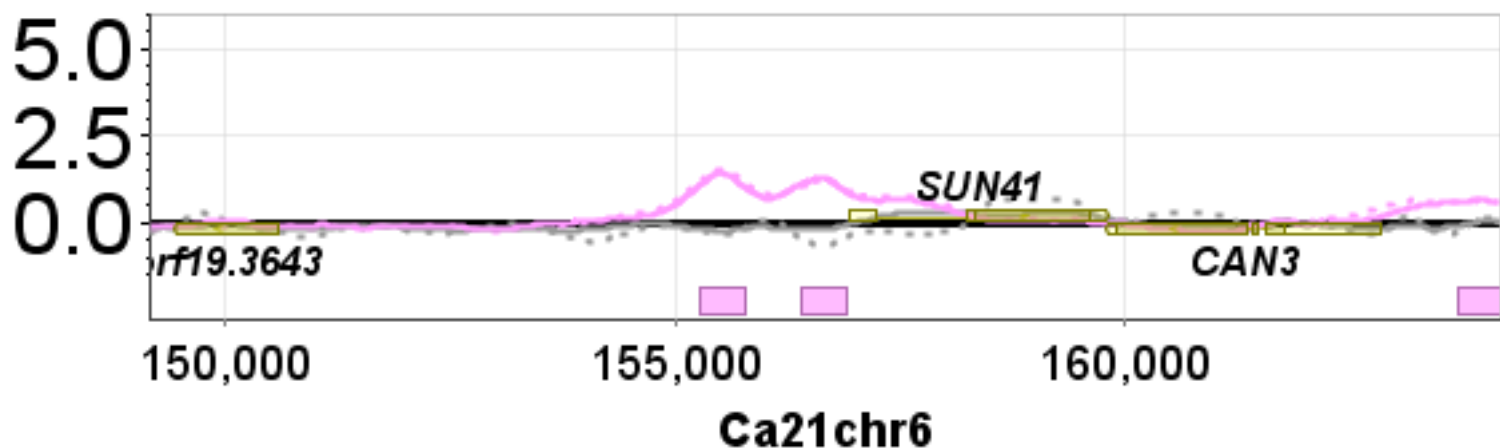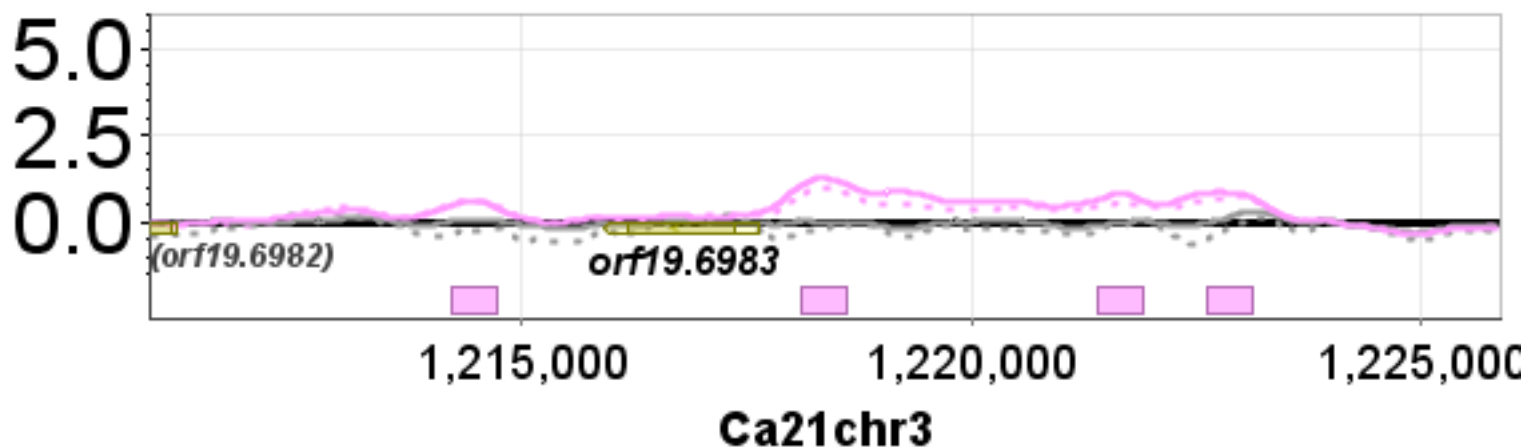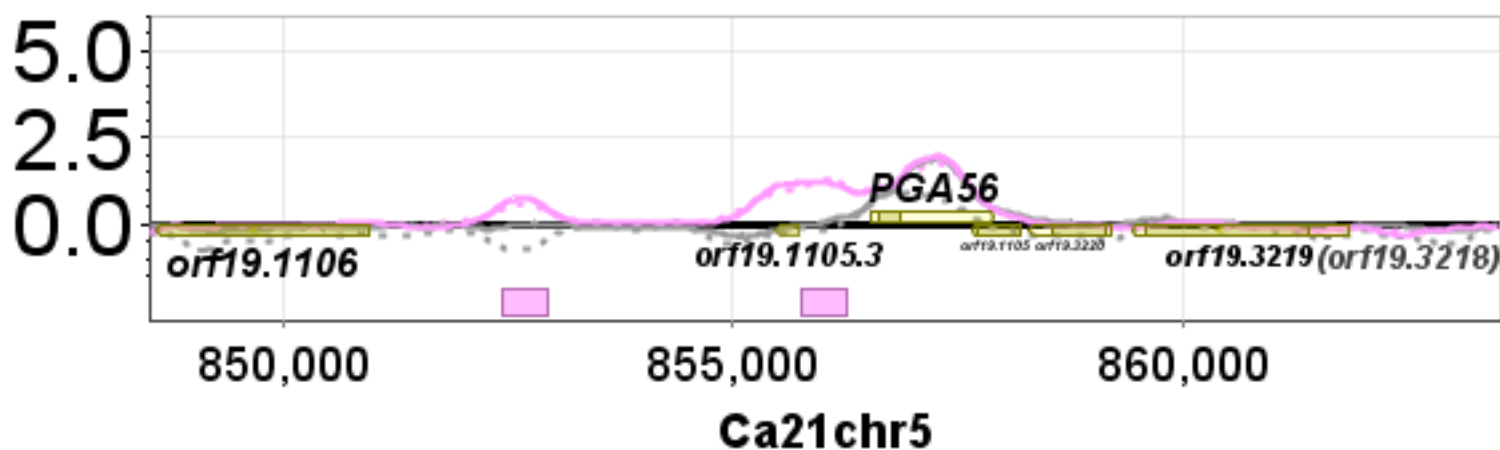

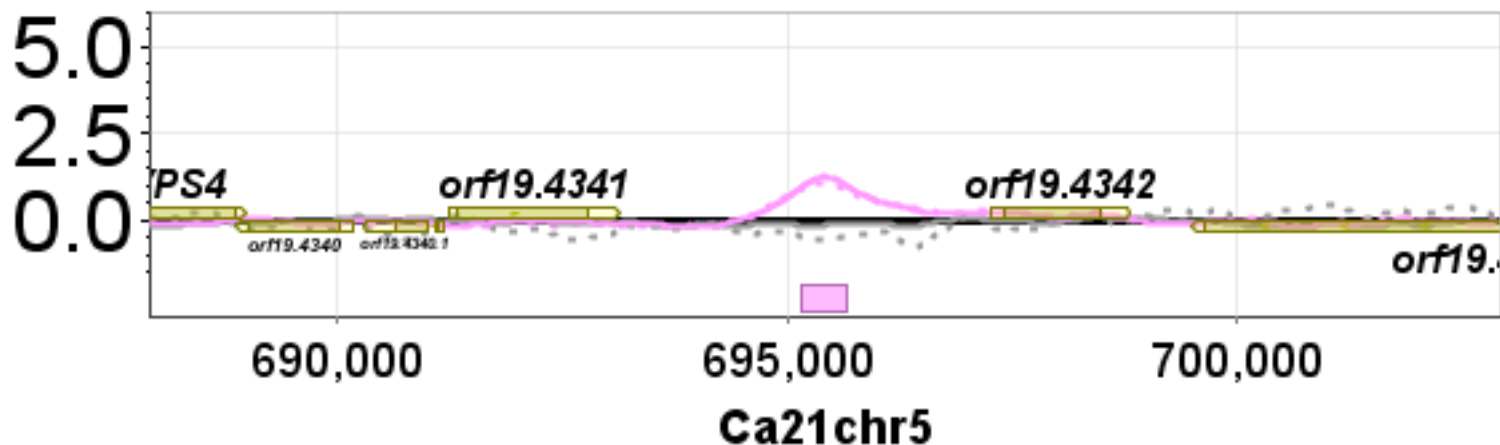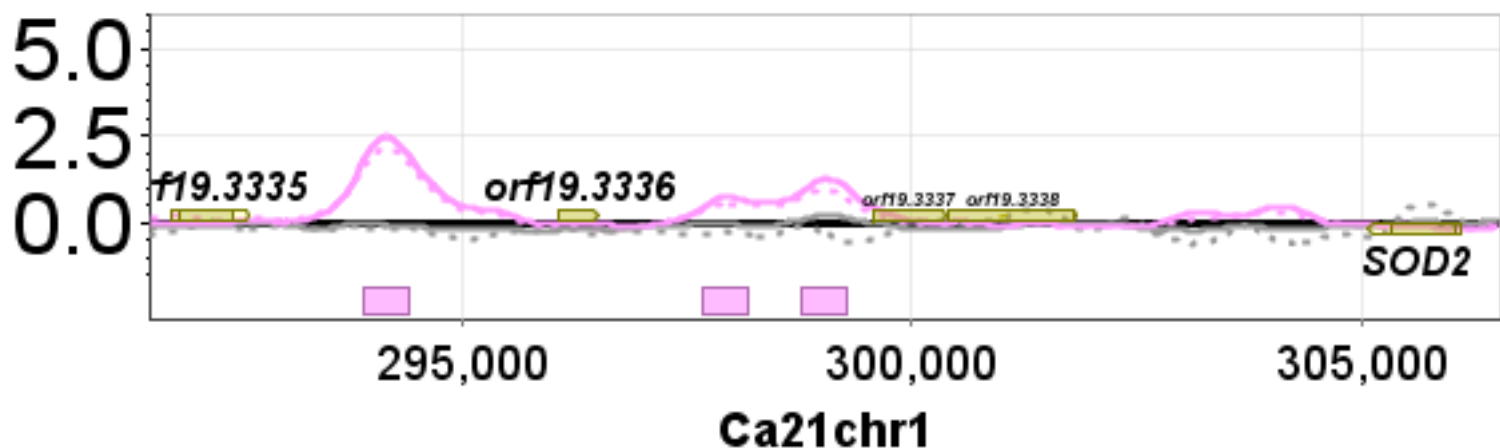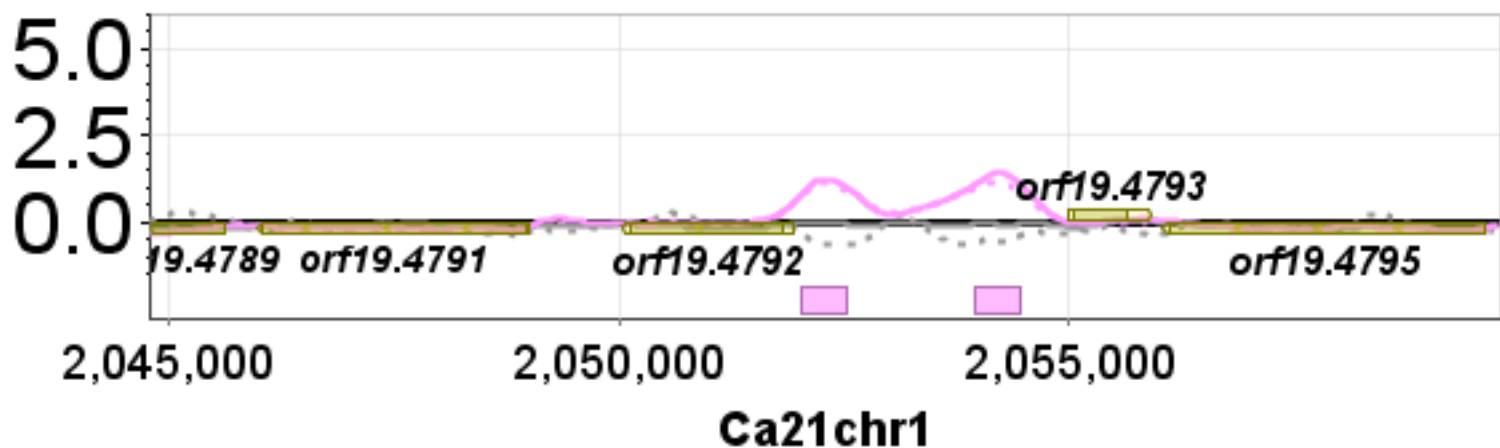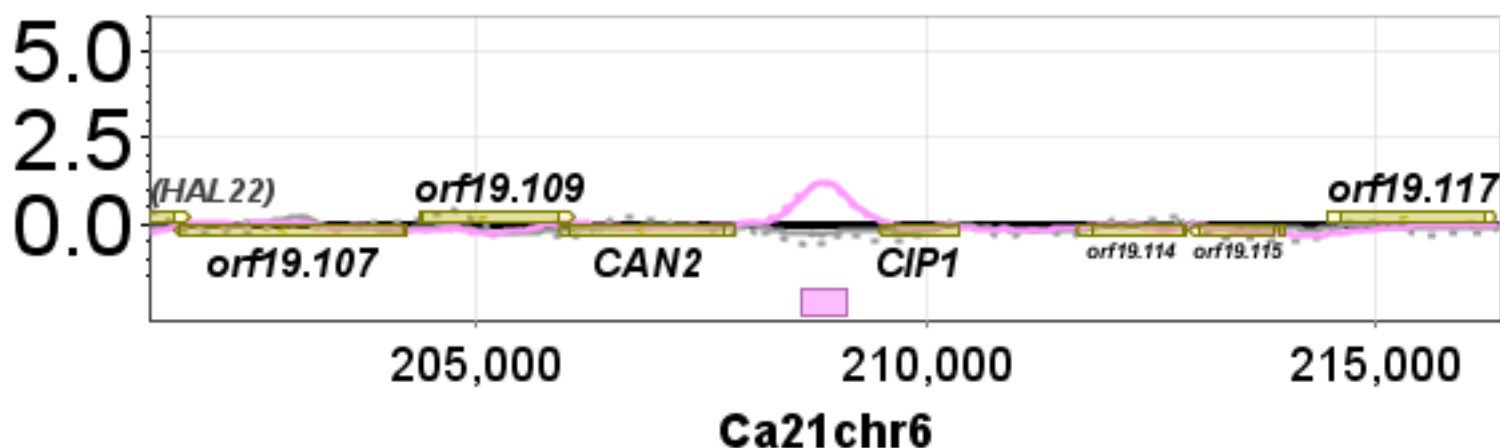

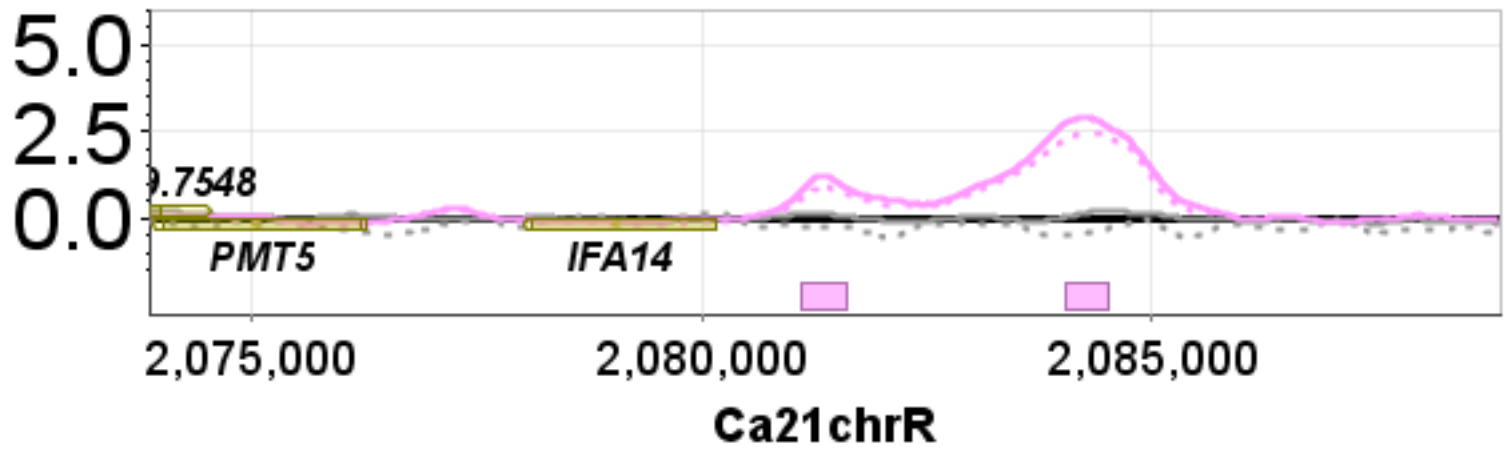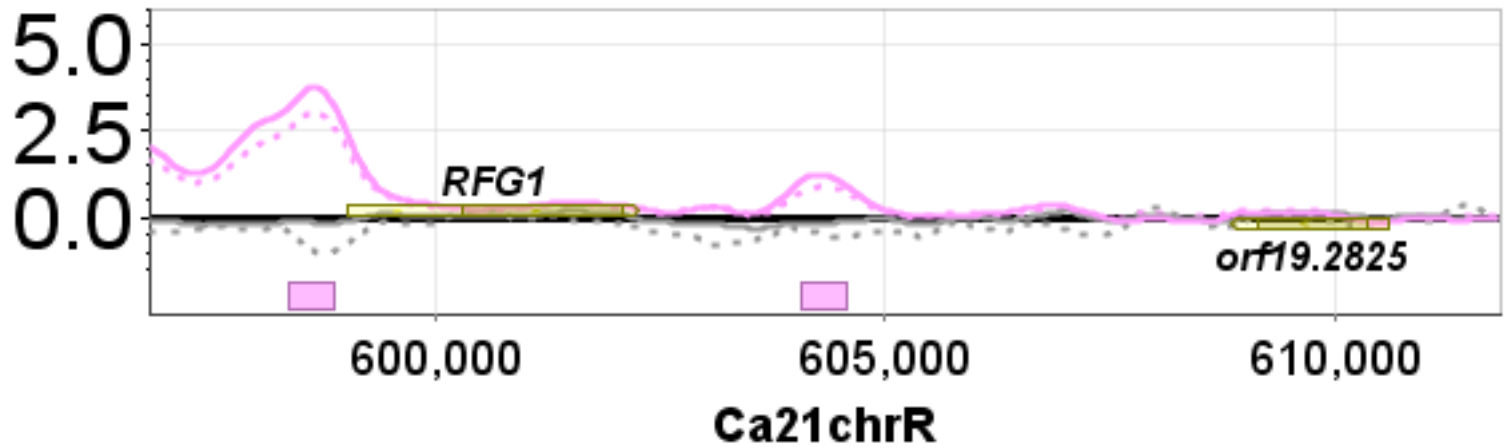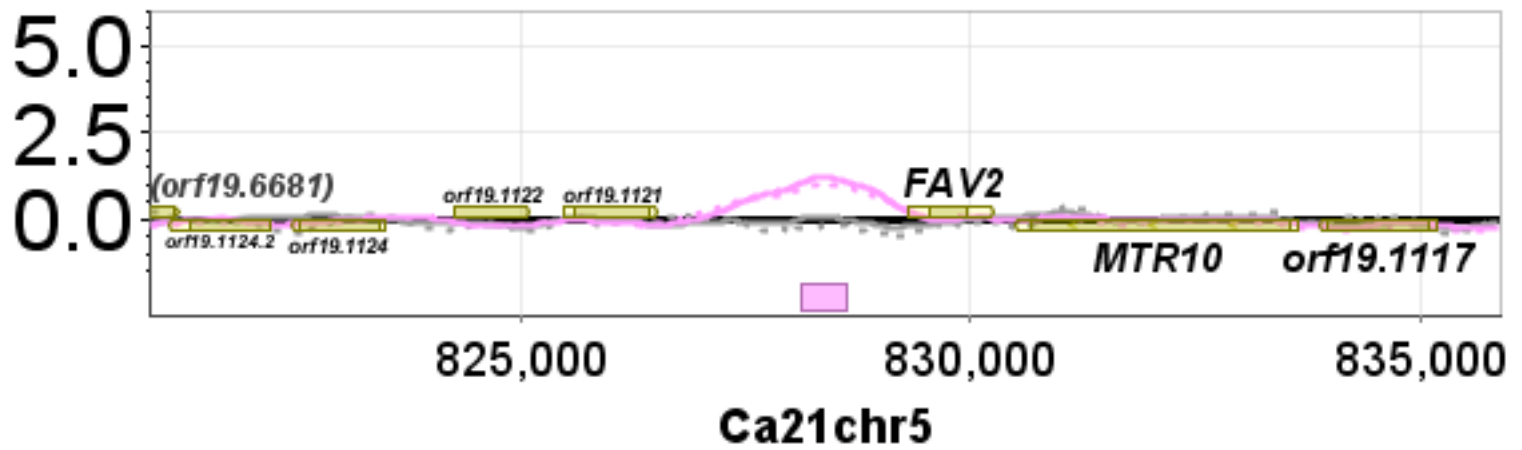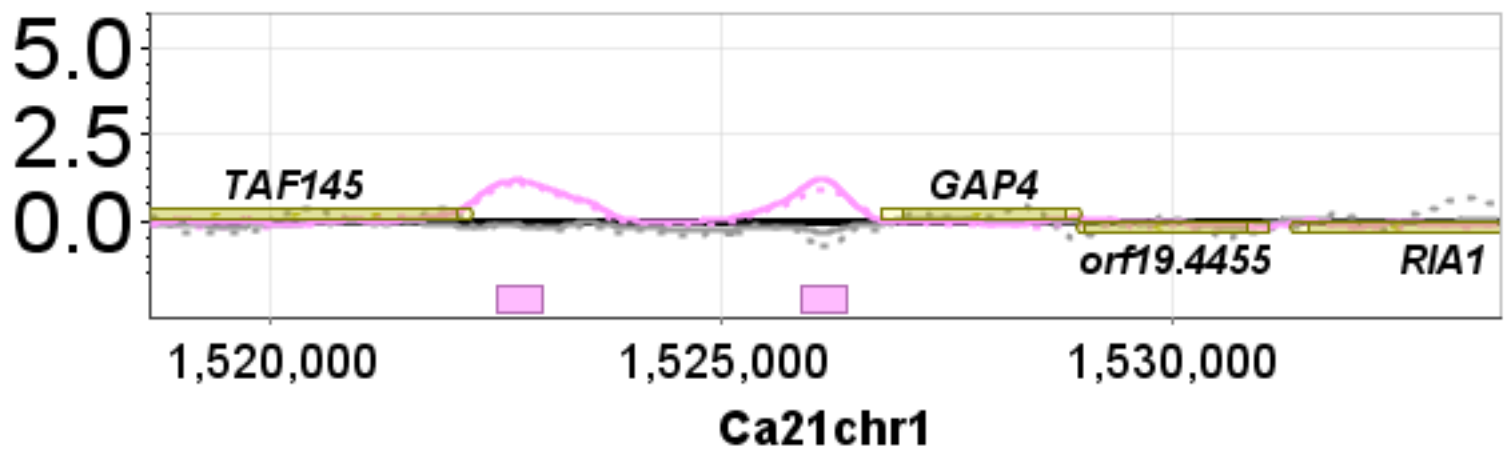

[1.198] Ca21chr4:553518-568517 [+] [orf19.2726, ntar\_769, GRX3, orf19.2728, orf19.2725]

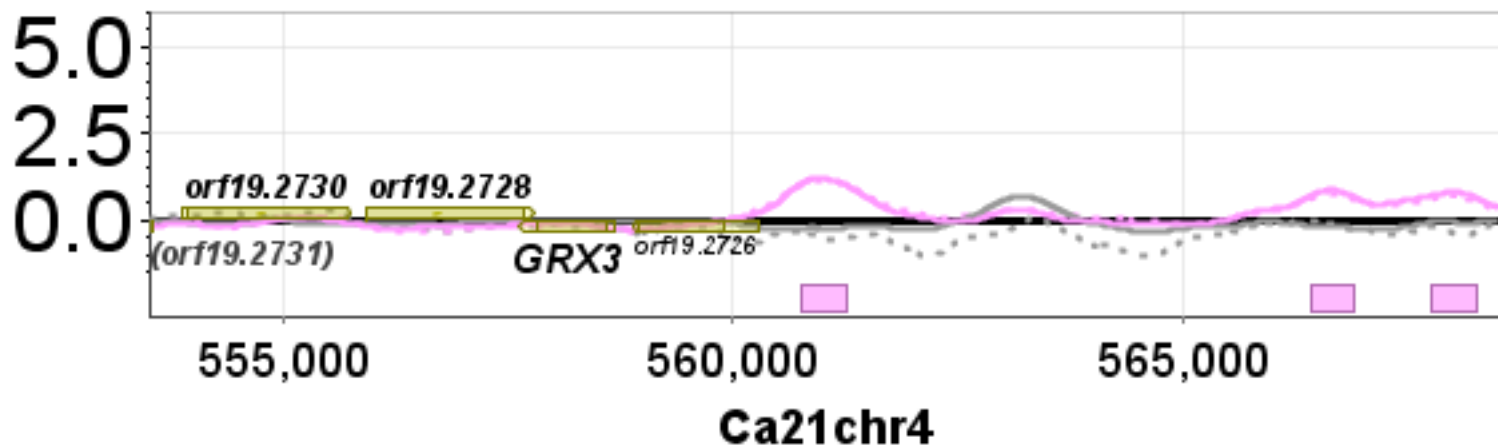

[1.195] Ca21chr4:1517304-1532303 [+] [CZF1, CCT6, orf19.3125, orf19.3128, orf19.3124]

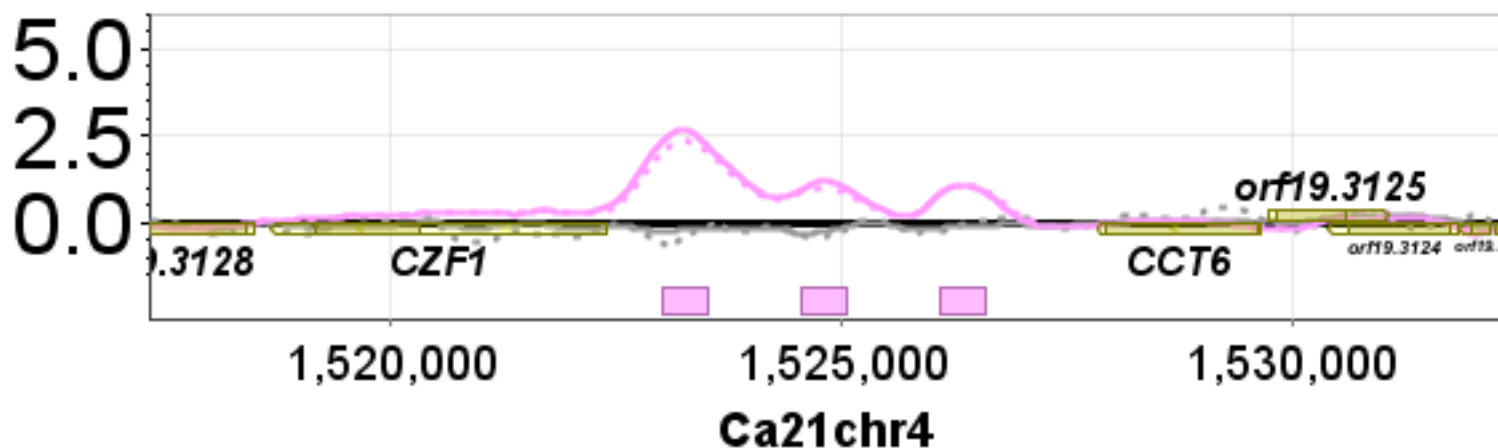

[1.192] Ca21chrR:1471463-1486462 [+] [orf19.1842, ALG6, ntar\_1329, ts(aga)2, orf19.1841]

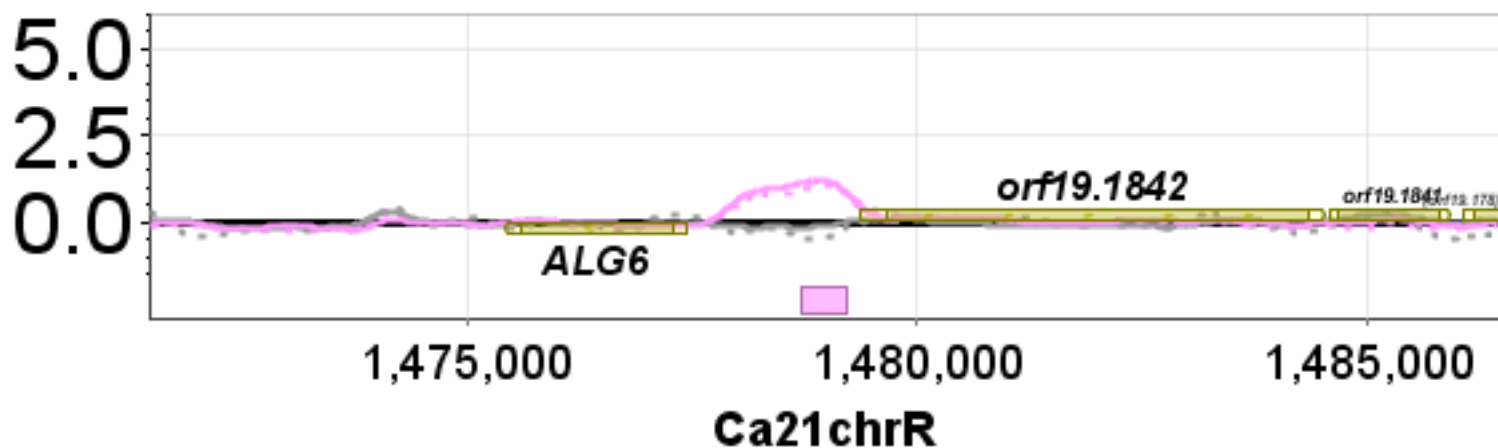

[1.177] Ca21chr1:448751-463750 [+] [GAL7, GAL102, orf19.3673, ABP140, orf19.3677]

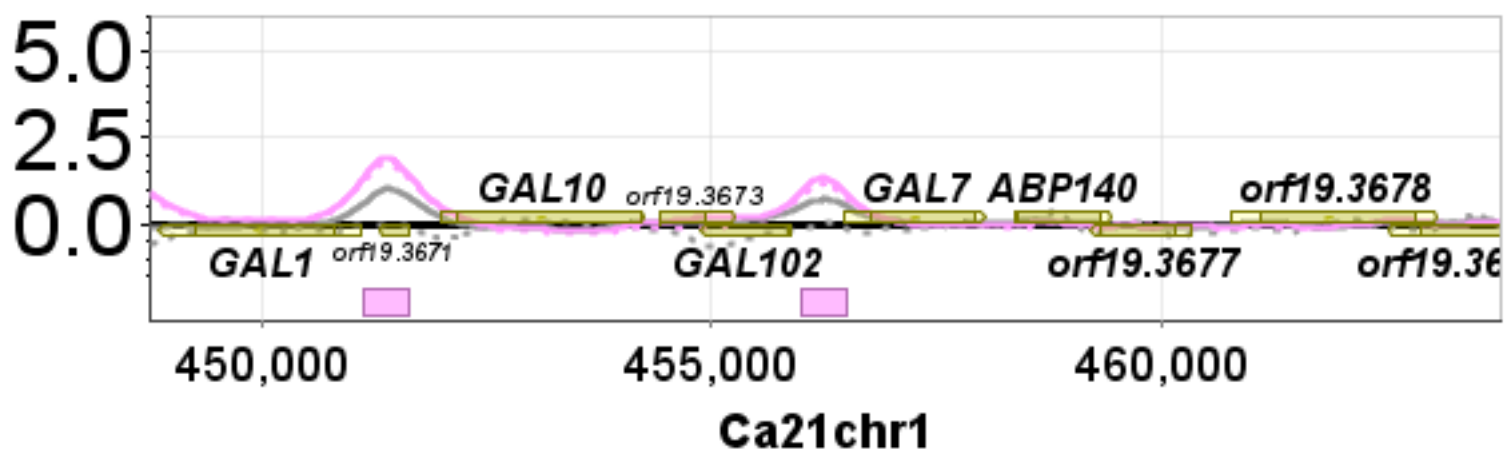

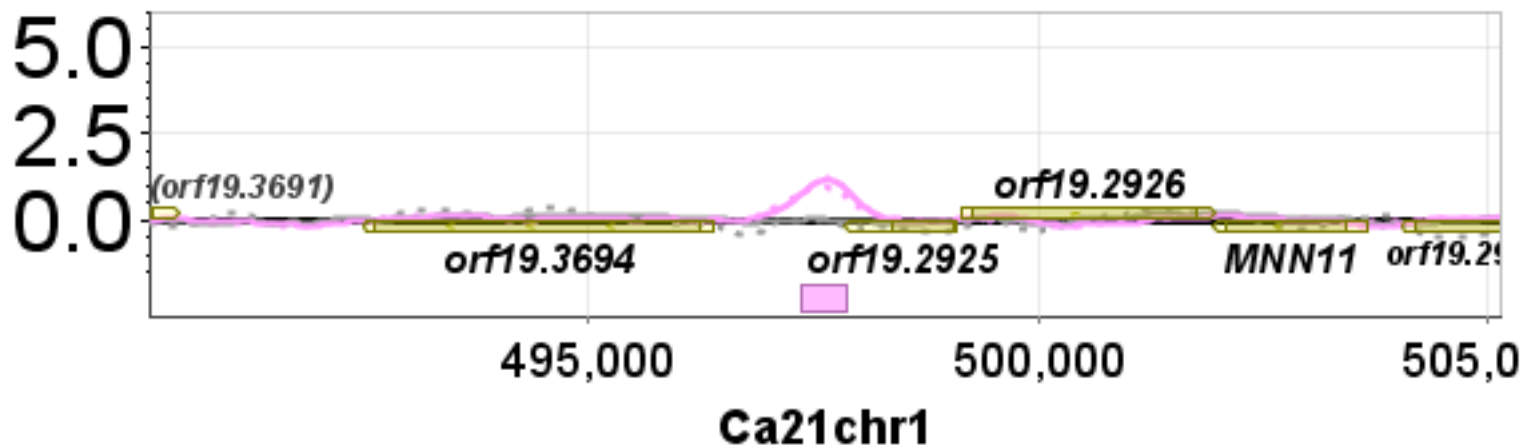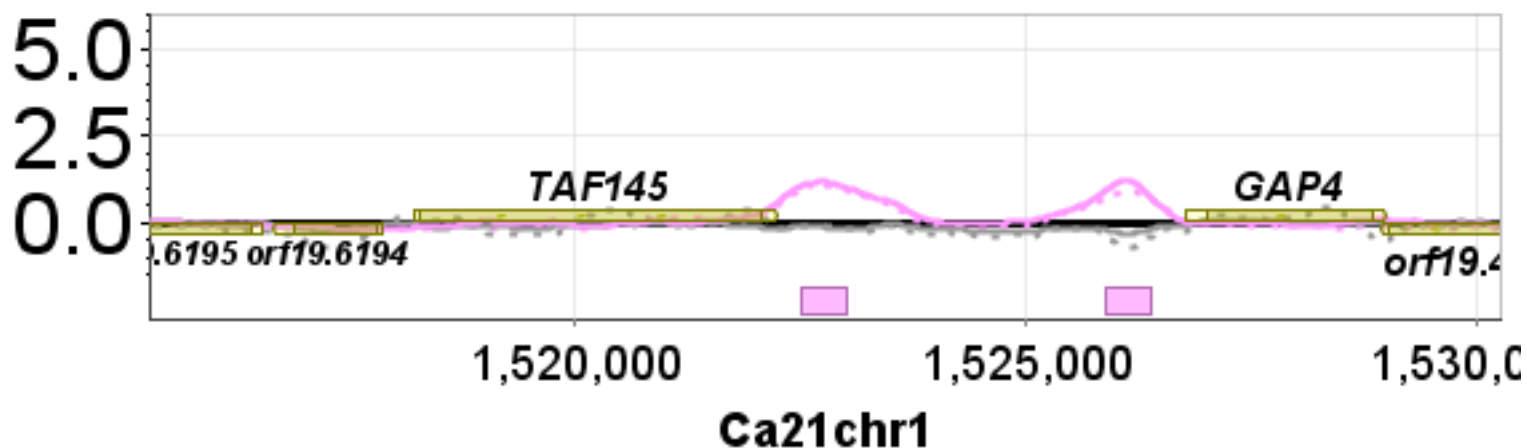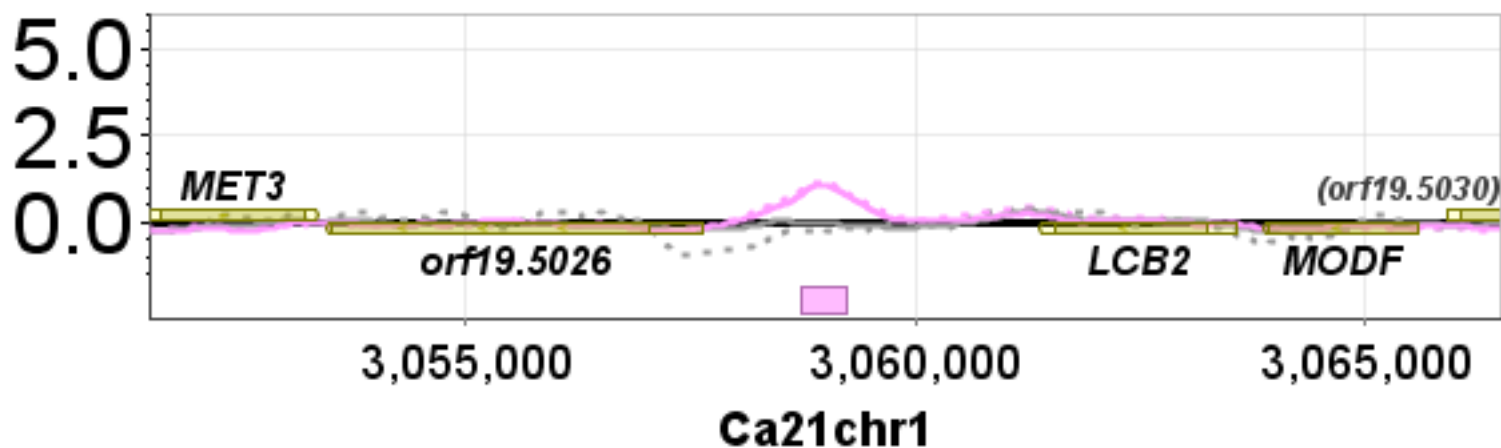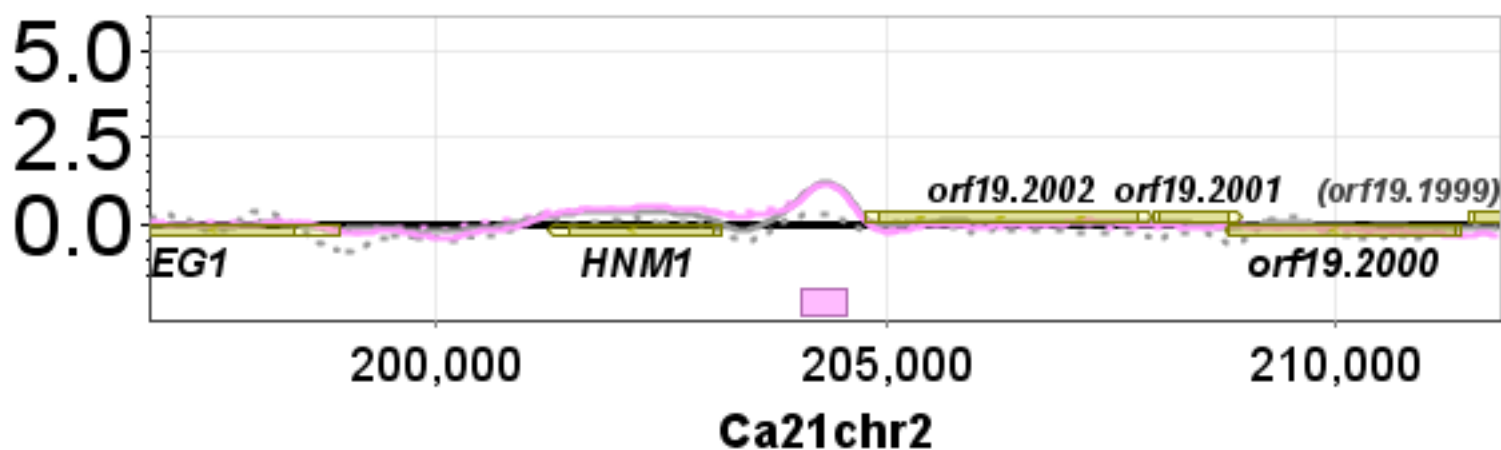

[1.152] Ca21chr5:914773-929772 [+] [CHT2, orf19.3897, orf19.3894, ntar\_941, orf19.3898]

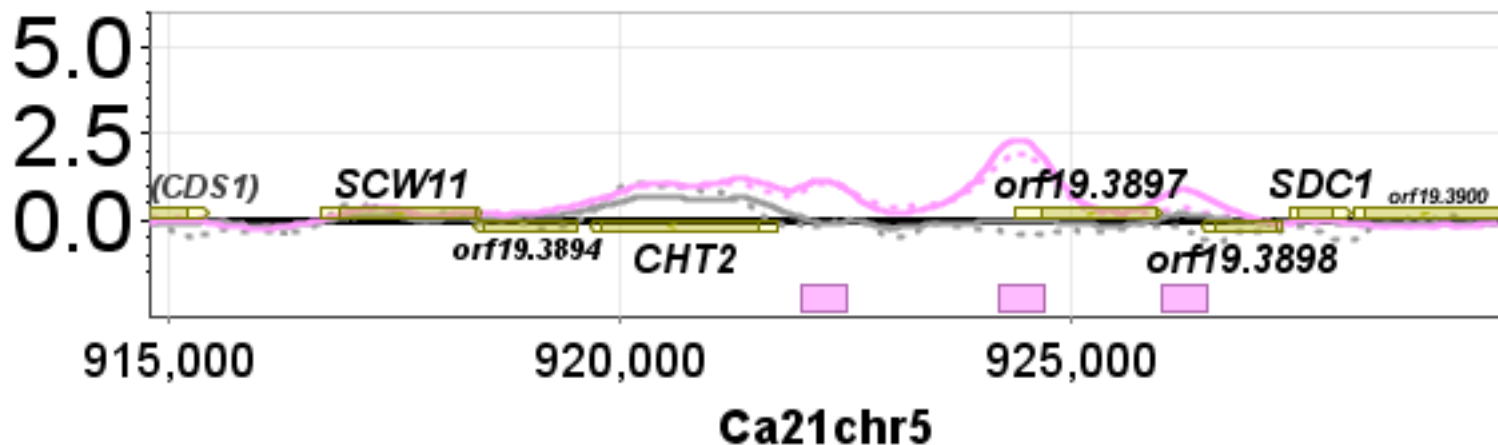

[1.151] Ca21chr5:253491-268490 [+] [CYC3, ntar\_867, orf19.1956, ntar\_866, ntar\_1424]

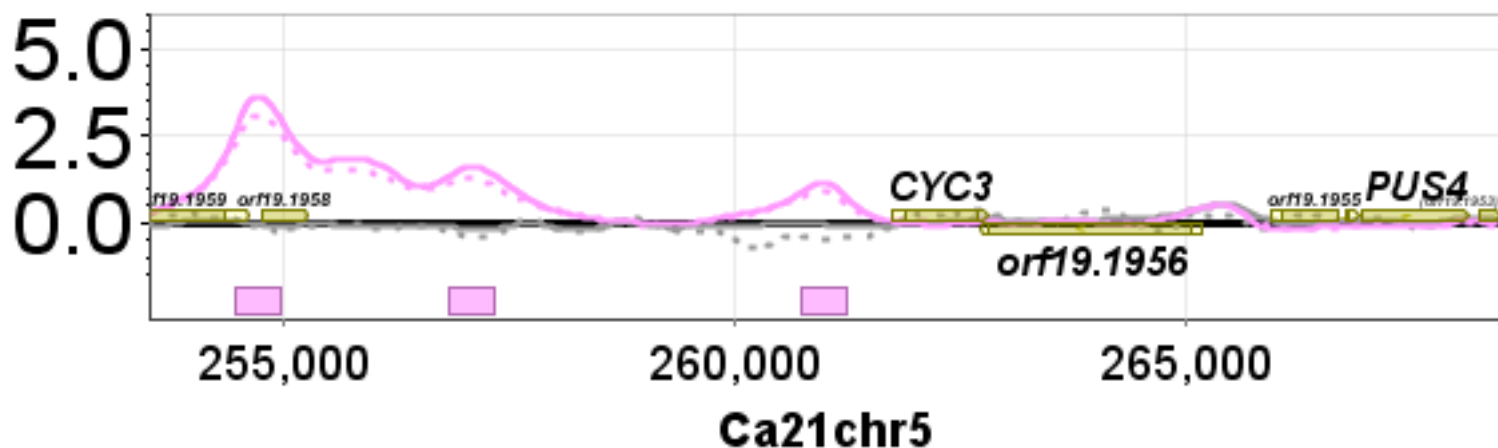

[1.141] Ca21chr1:3063894-3078893 [+] [ntar\_277, SIM1, SSK1, orf19.5033, orf19.5034]

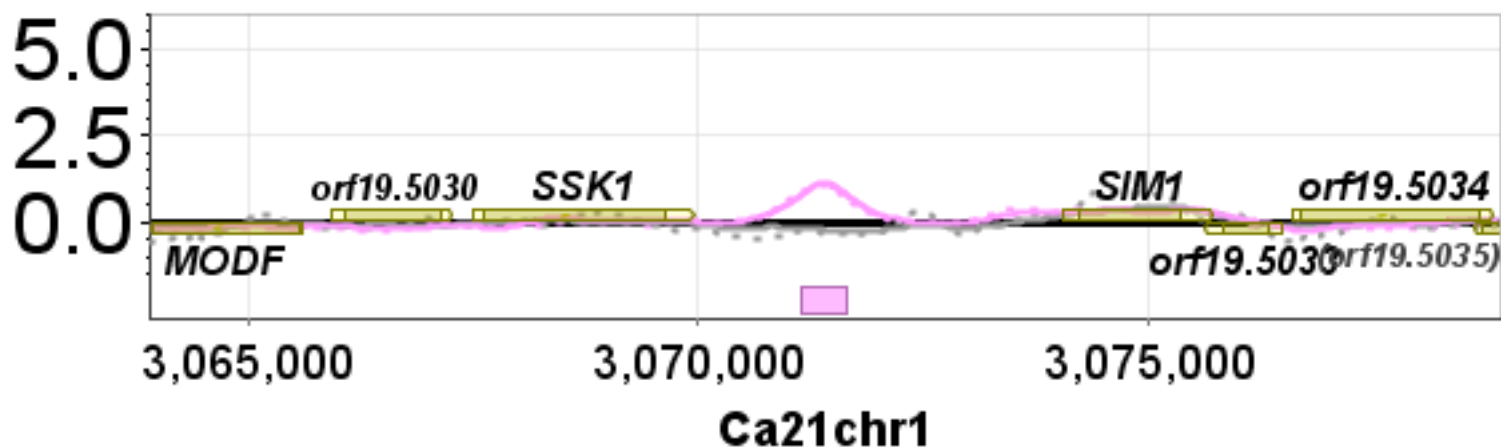

[1.129] Ca21chr1:2623809-2638808 [+] [ntar\_247, orf19.5264, SER33, KIP4, orf19.5262]

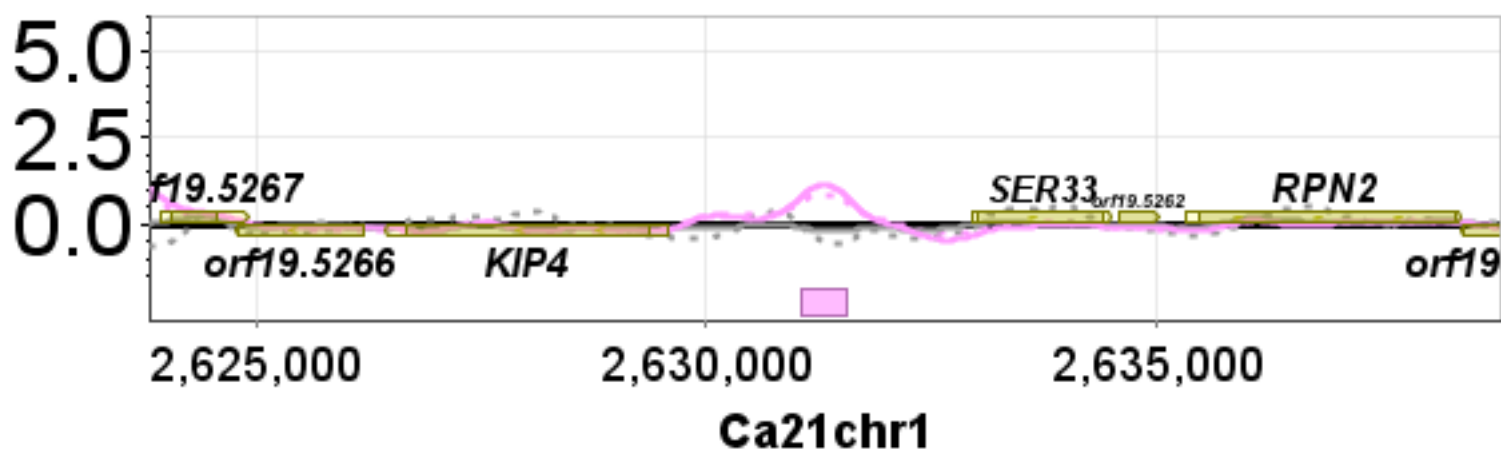



[1.128] Ca21chrR:872268-887267 [+] [orf19.467, ntar\_1253, ntar\_1254, ntar\_1255, HST7]

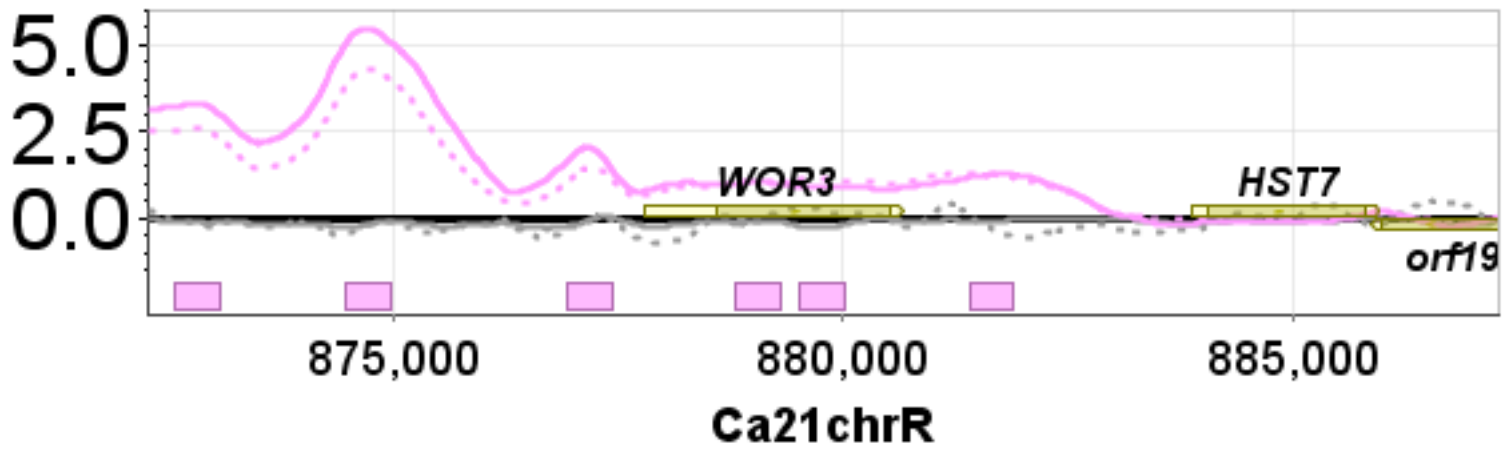

[1.122] Ca21chr1:2186834-2201833 [+] [SFU1, SWE1, DBP3, ERO1]

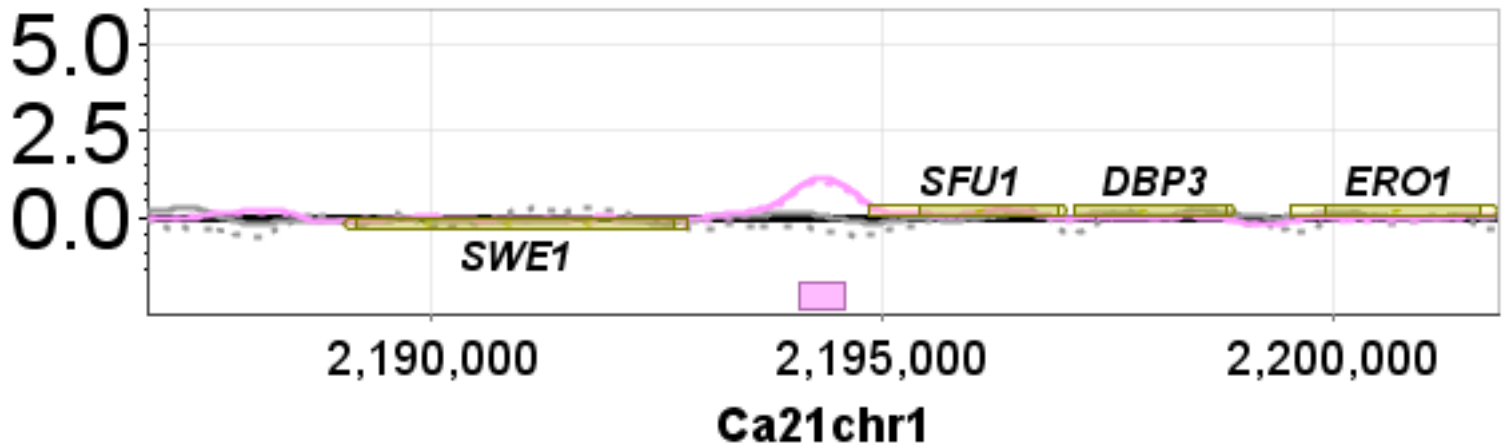

[1.12] Ca21chr6:353949-368948 [+] [PTK2, ntar\_996, SUR7, FGR37, RPL32]

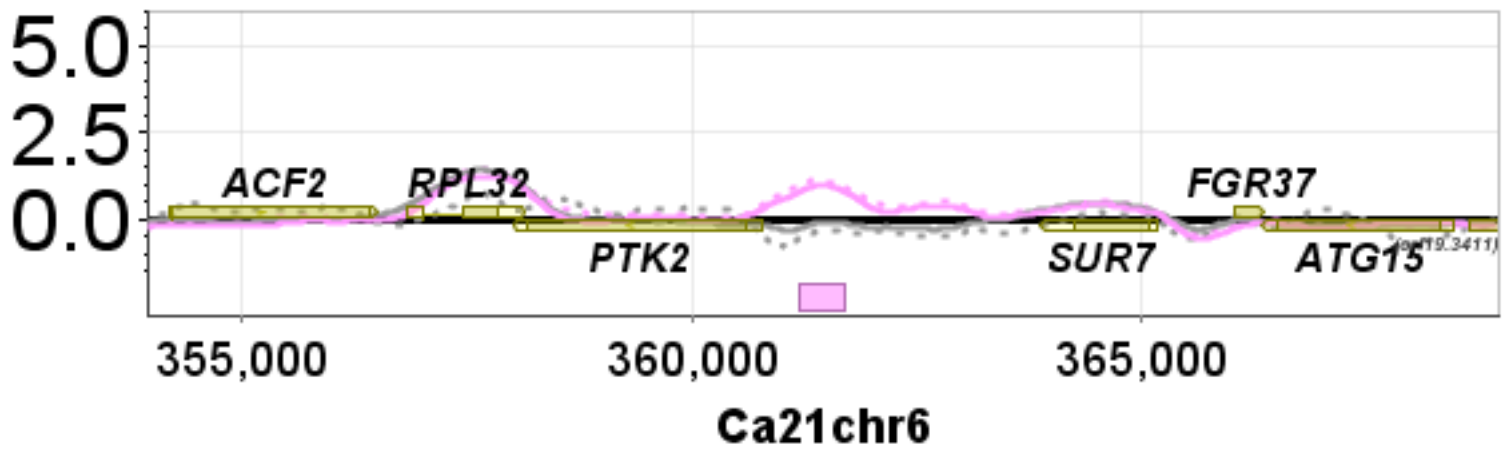

[1.111] Ca21chr1:2789933-2804932 [+] [orf19.4914, orf19.4913, orf19.4914.1, ntar\_253, orf19.6340]

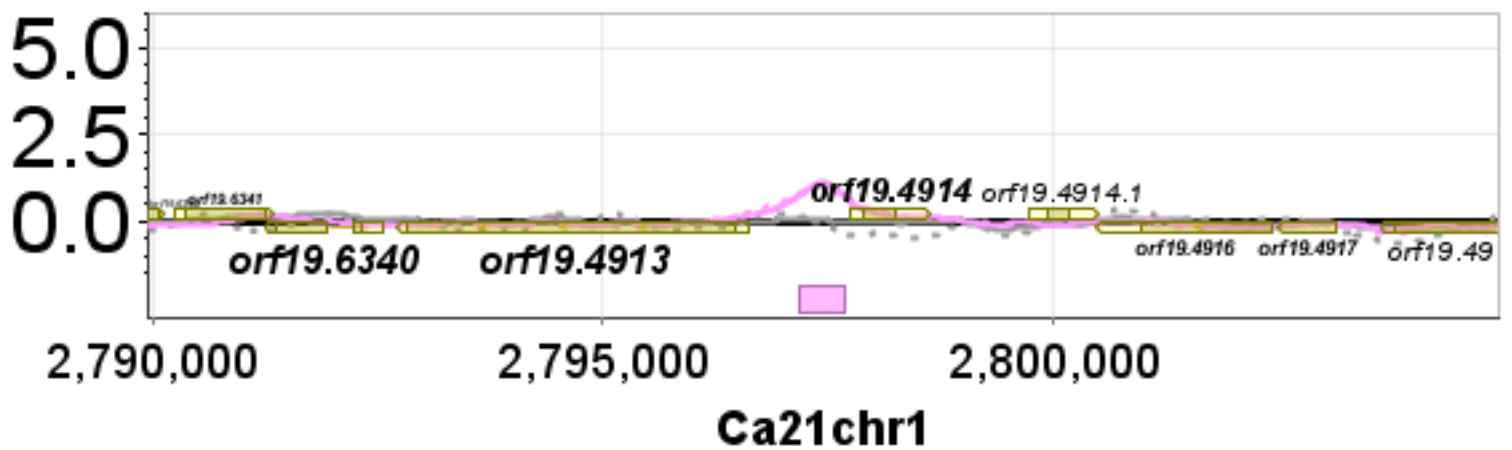

[1.096] Ca21chr5:116682-131681 [+] [ntar\_855, orf19.932, orf19.933, orf19.934, orf19.931]

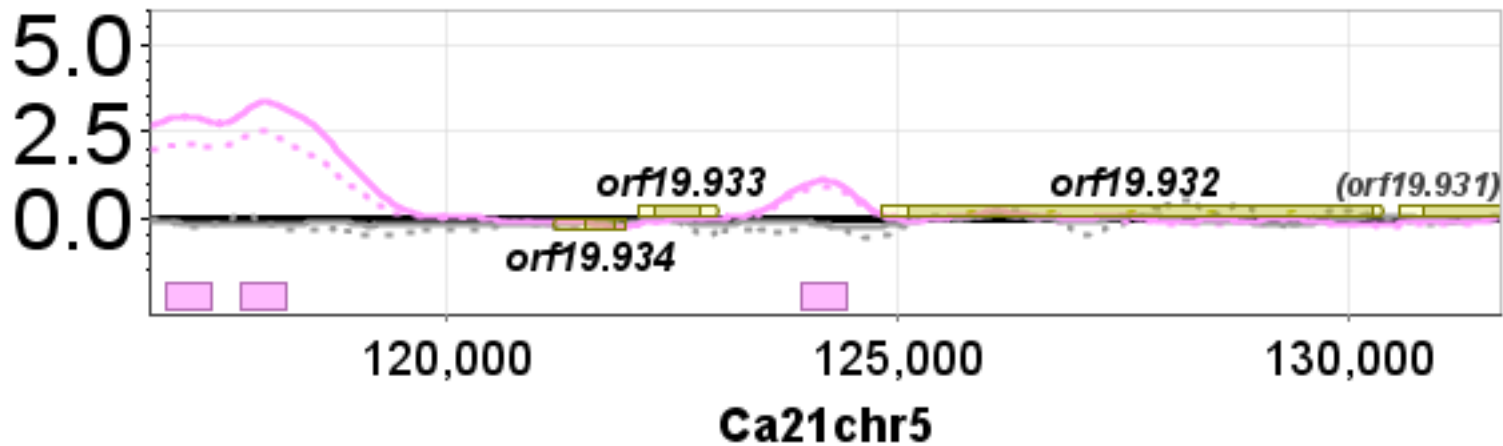

[1.091] Ca21chr4:1518841-1533840 [+] [CCT6, orf19.3125, CZF1, orf19.3124, orf19.3123.2]

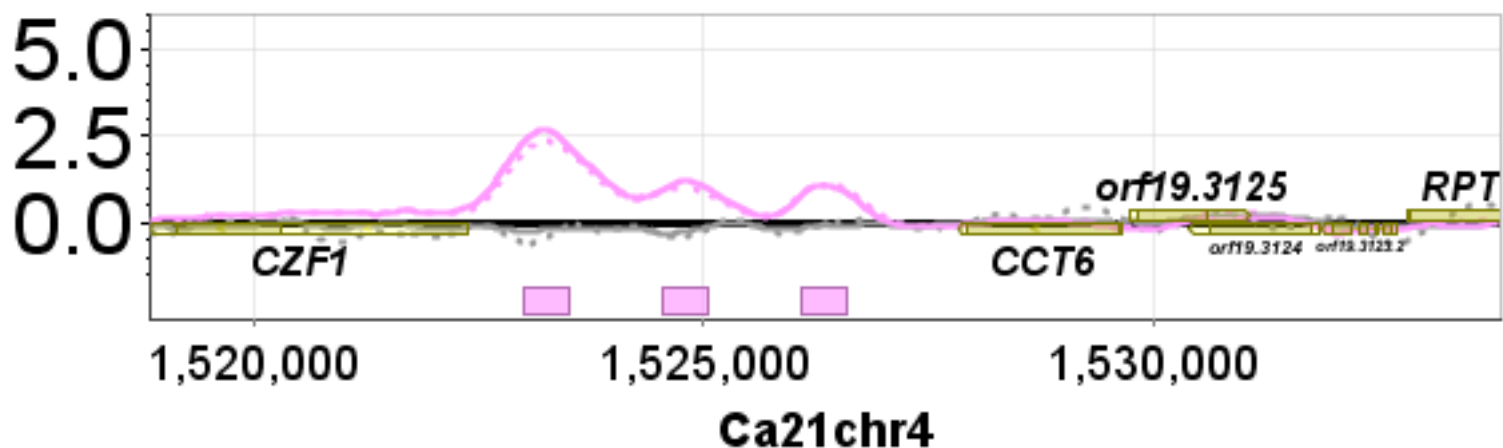

[1.084] Ca21chr7:138012-153011 [+] [orf19.7042, orf19.7043, ACB1, ntar\_1062, orf19.7041]

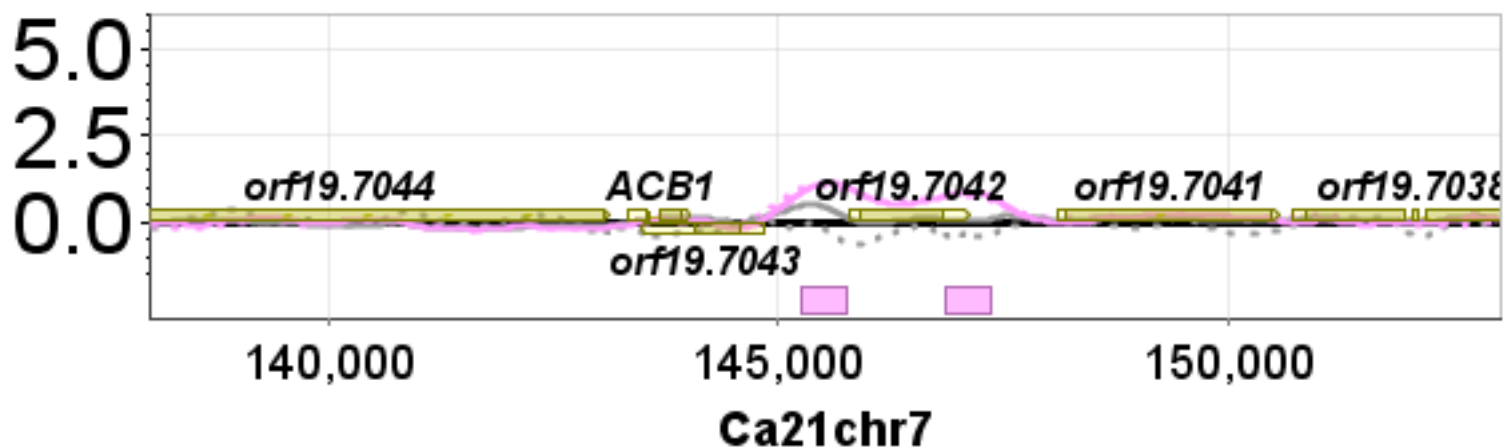

[1.064] Ca21chr4:271266-286265 [+] [PGA53, ntar\_735, ntar\_734, ILV6, ntar\_733]

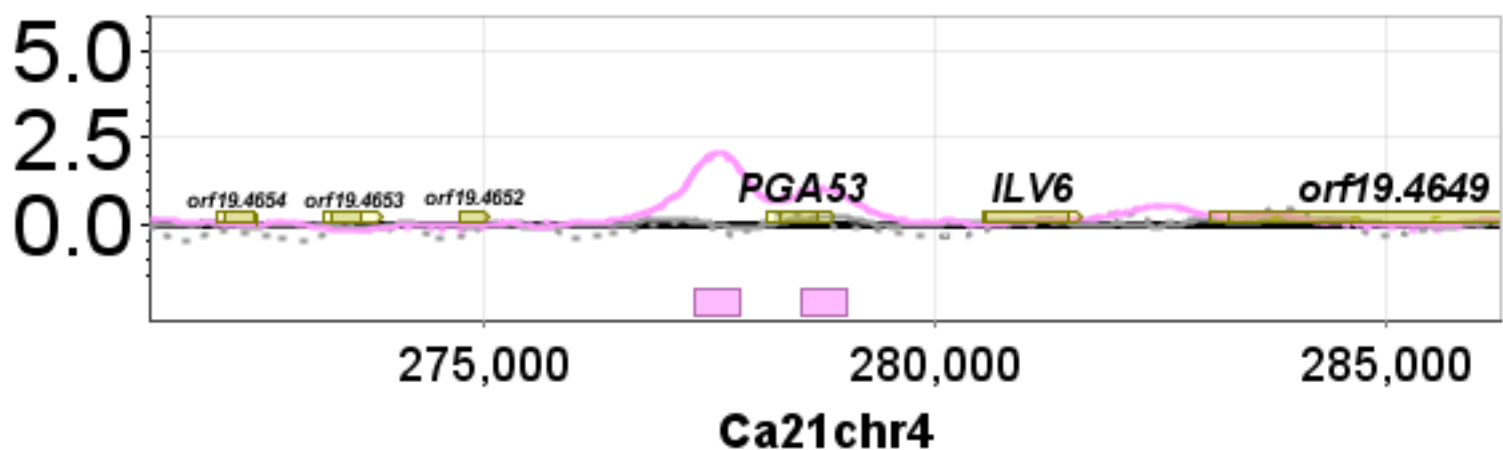

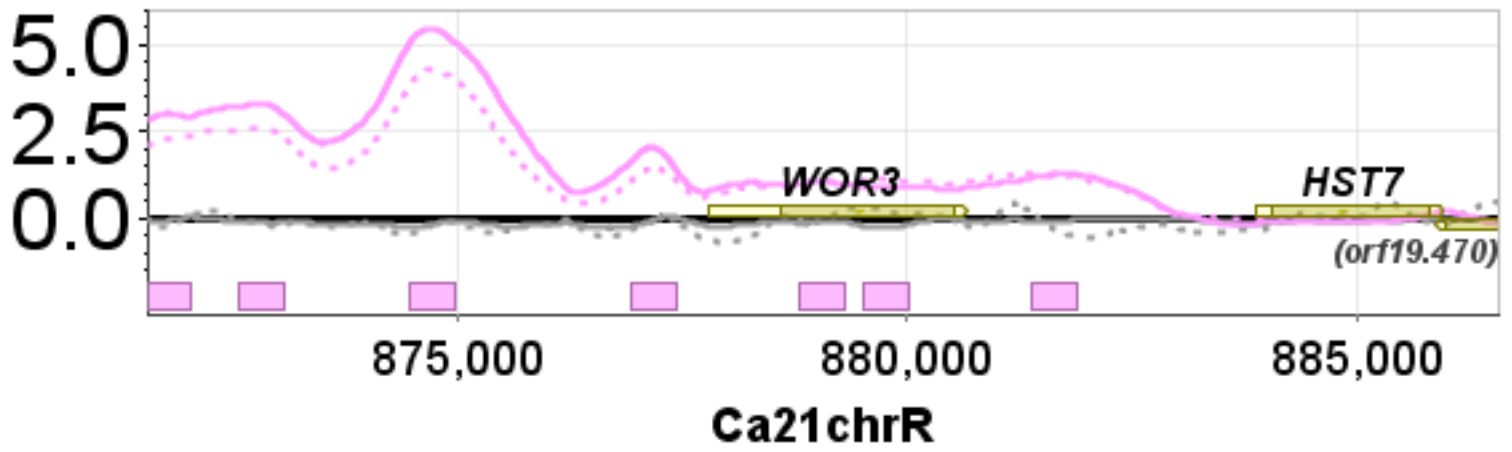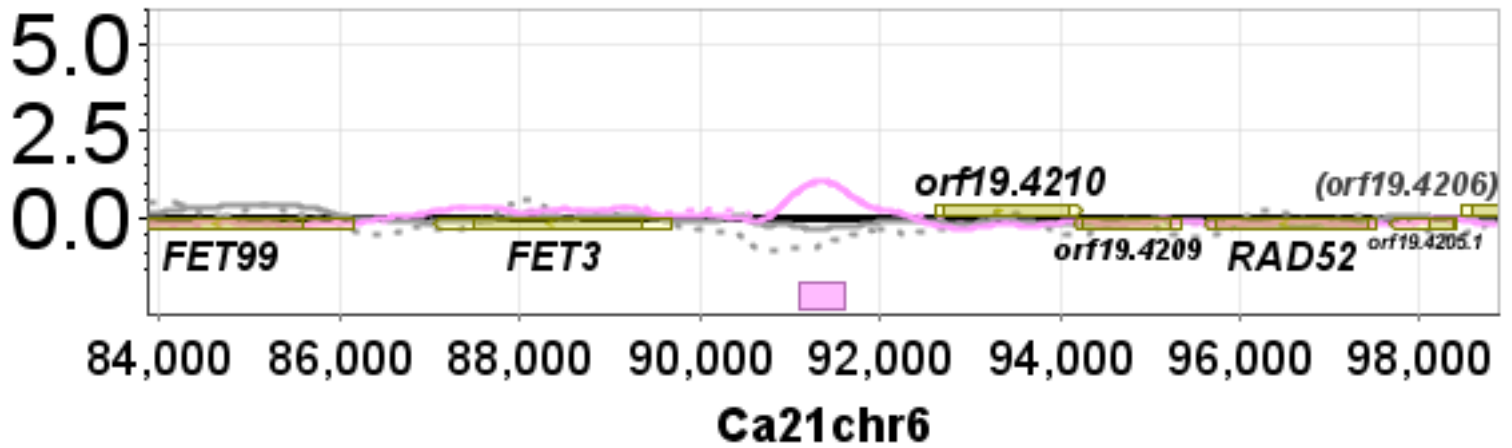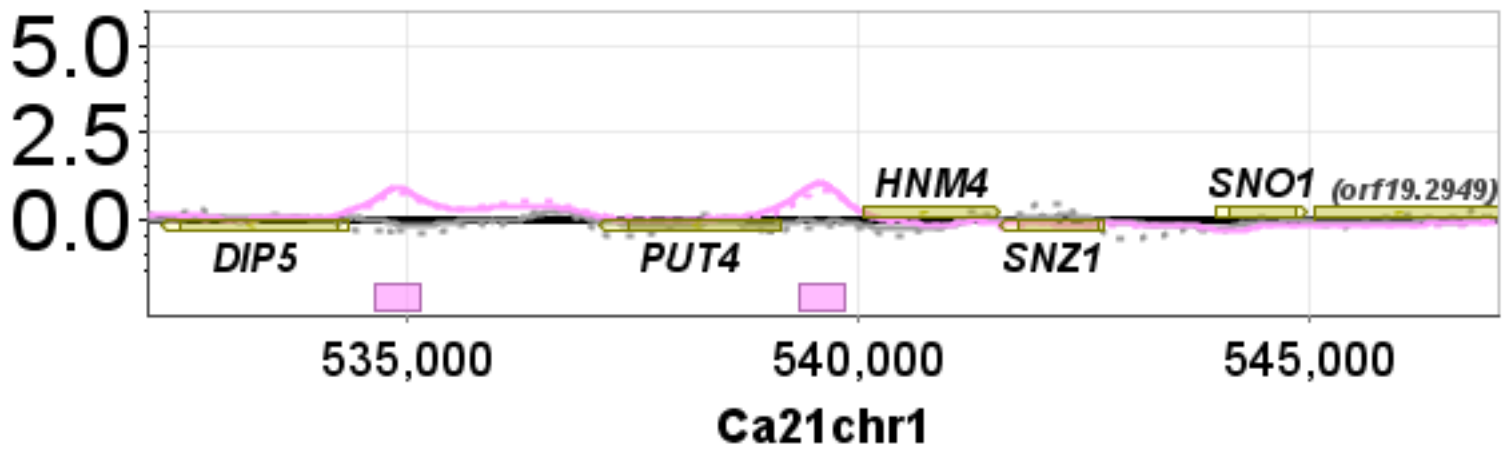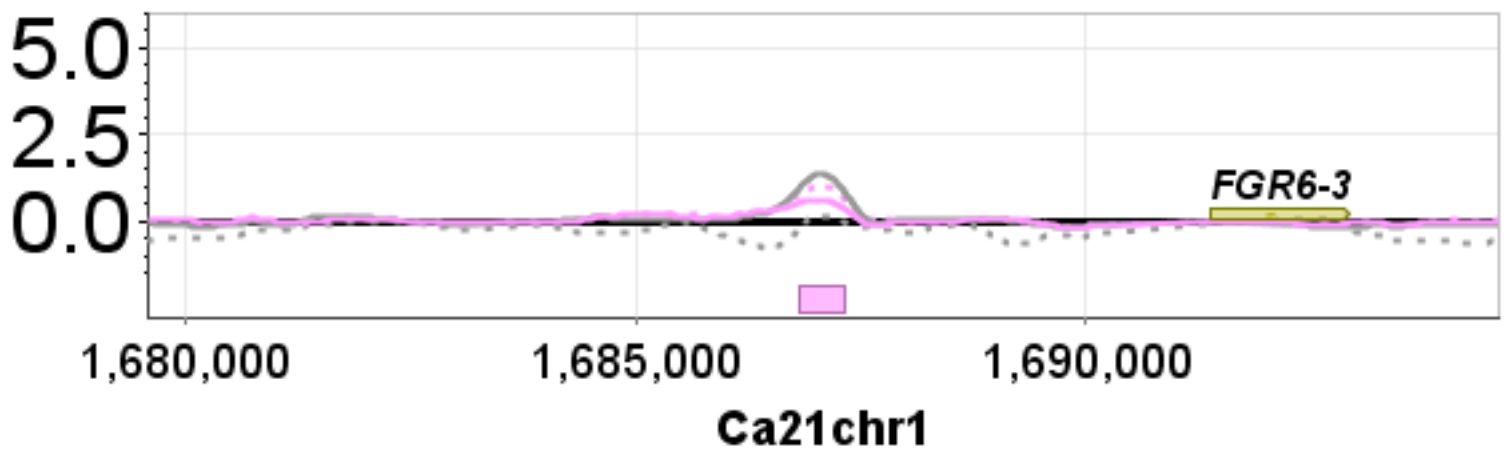

[1.0] Ca21chr1:2241562-2256561 [+] [orf19.4889, CLA4, orf19.4888, ntar\_208, ECM21]

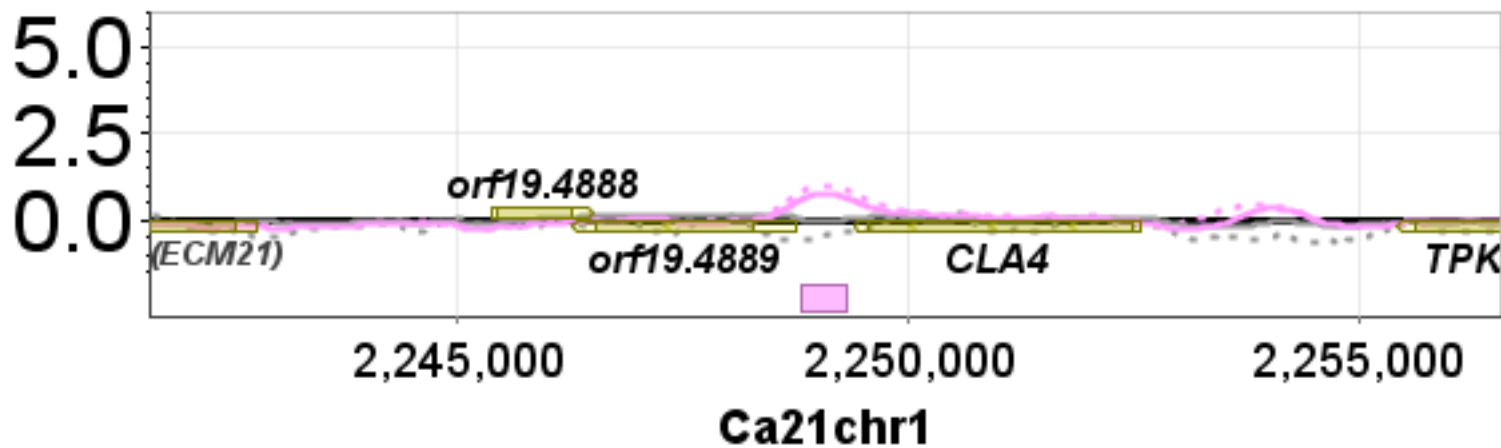

[1.0] Ca21chr4:393373-408372 [+] [CAT2, HSX11, RFX2, ntar\_751]

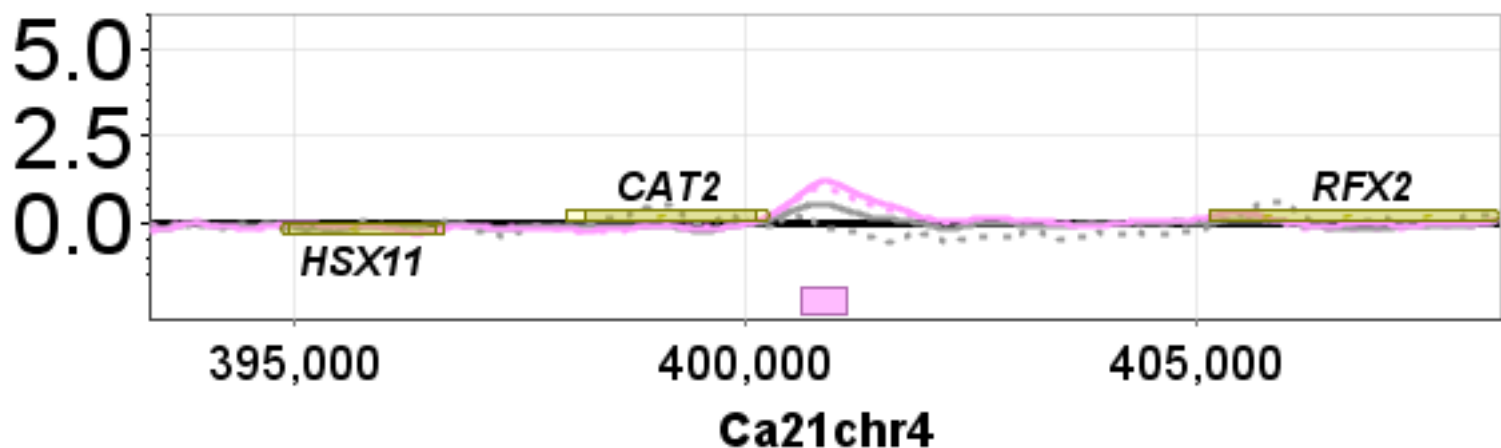

[0.996] Ca21chr2:1794751-1809750 [+] [PIR1, orf19.223, BUD20, orf19.225, orf19.217]

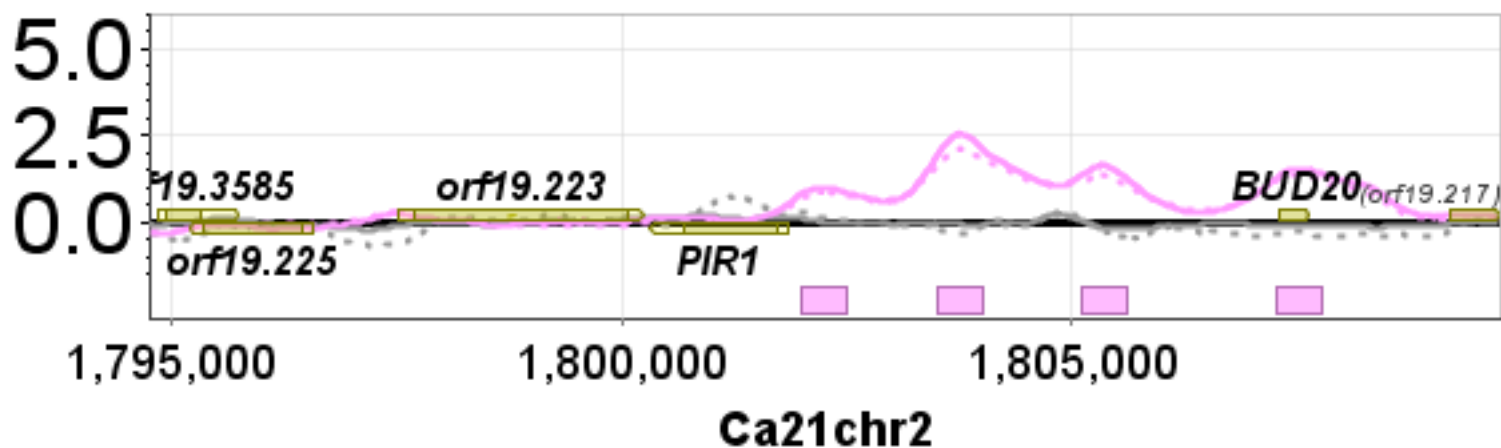

[0.993] Ca21chr2:1830509-1845508 [+] [ntar\_465, ntar\_466, orf19.204, ntar\_464, orf19.206]

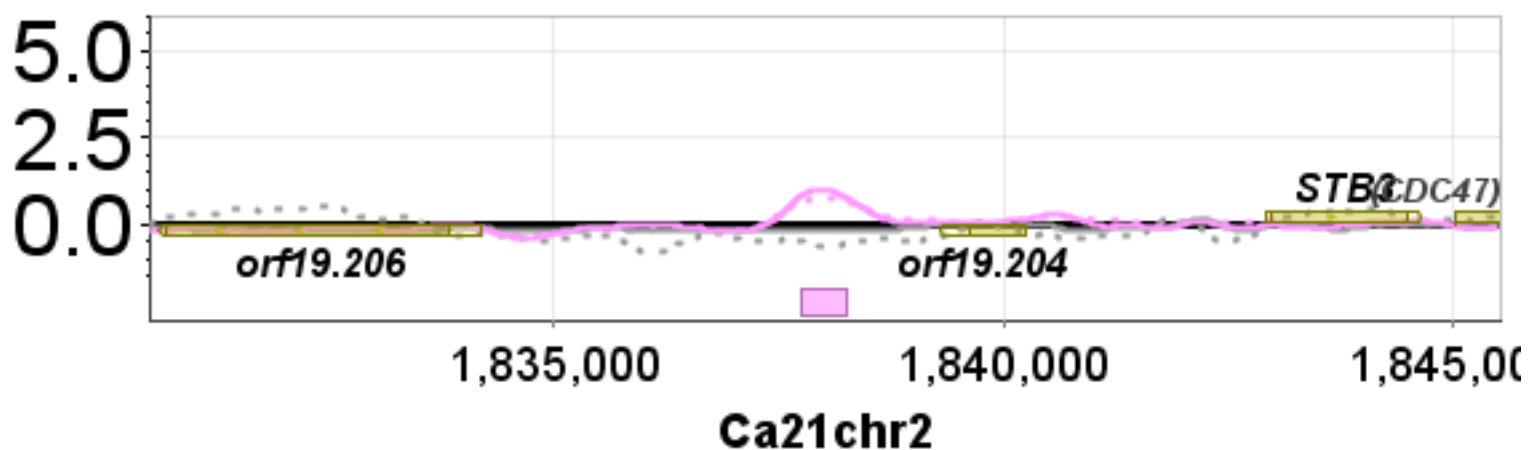

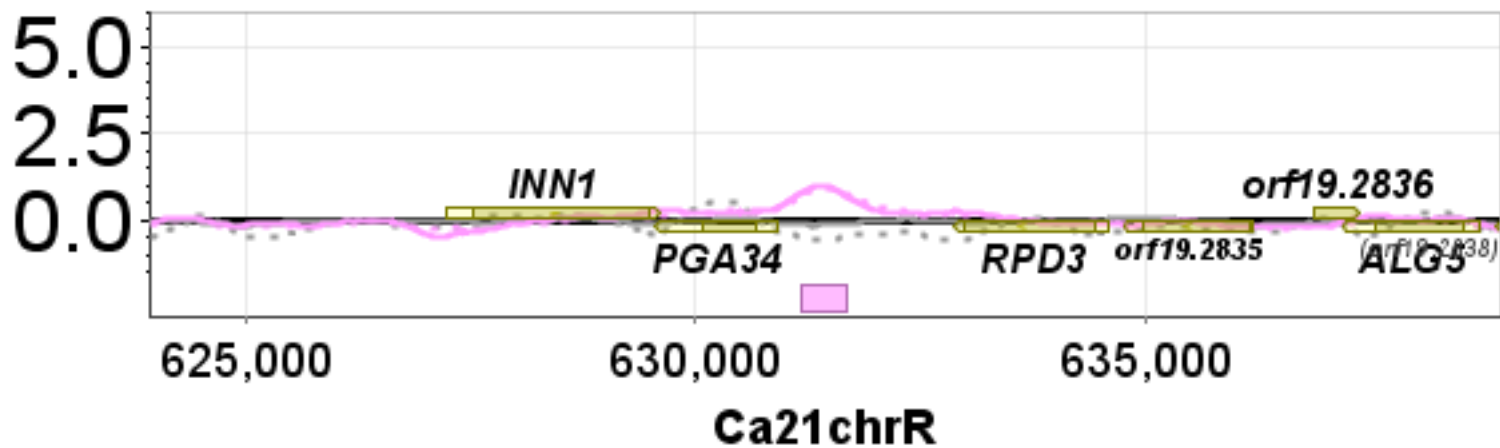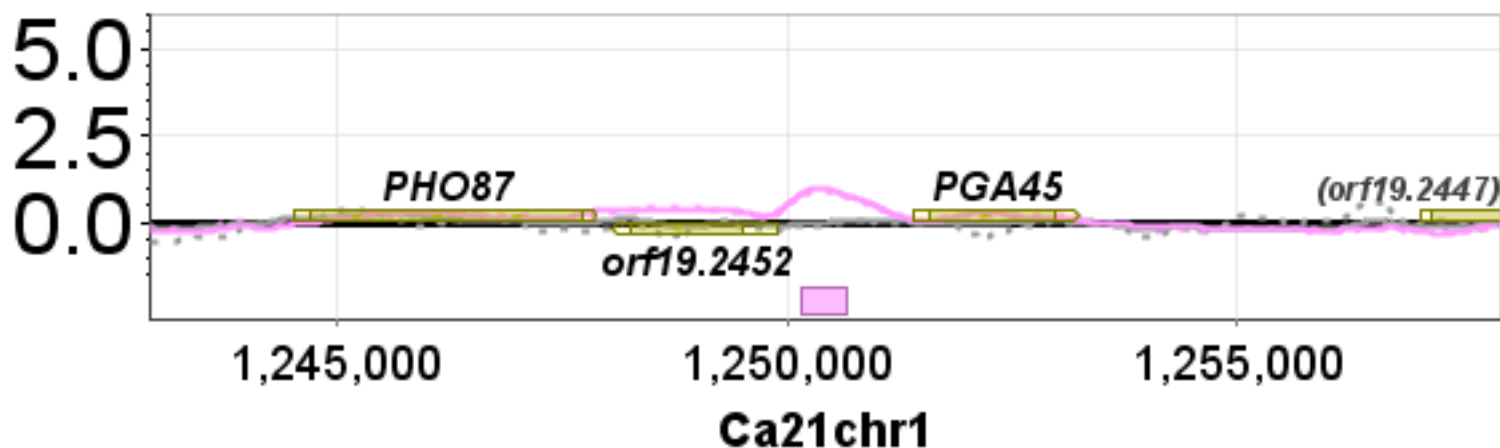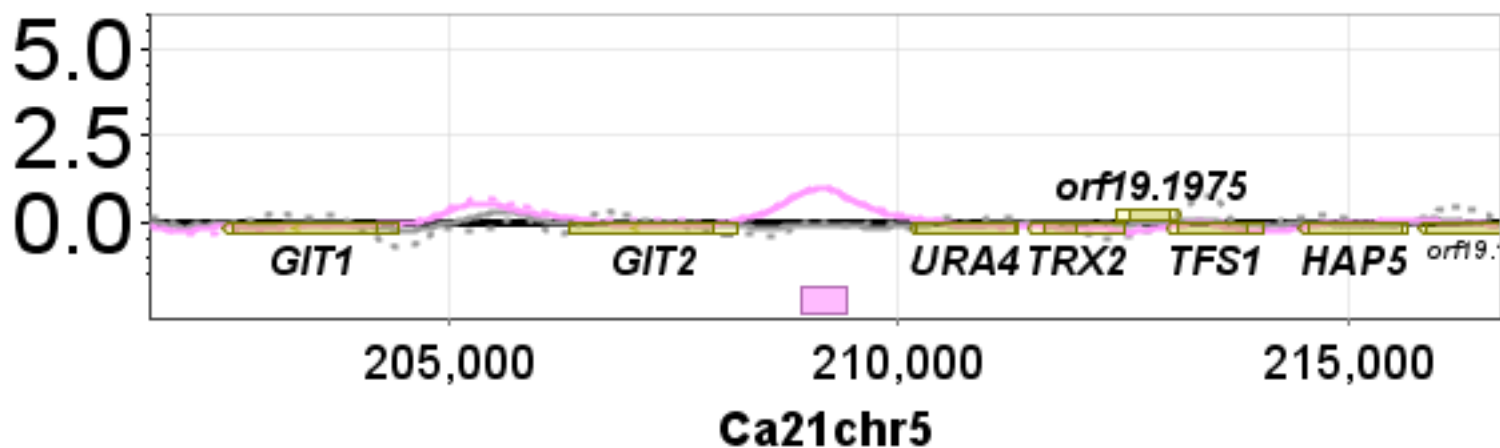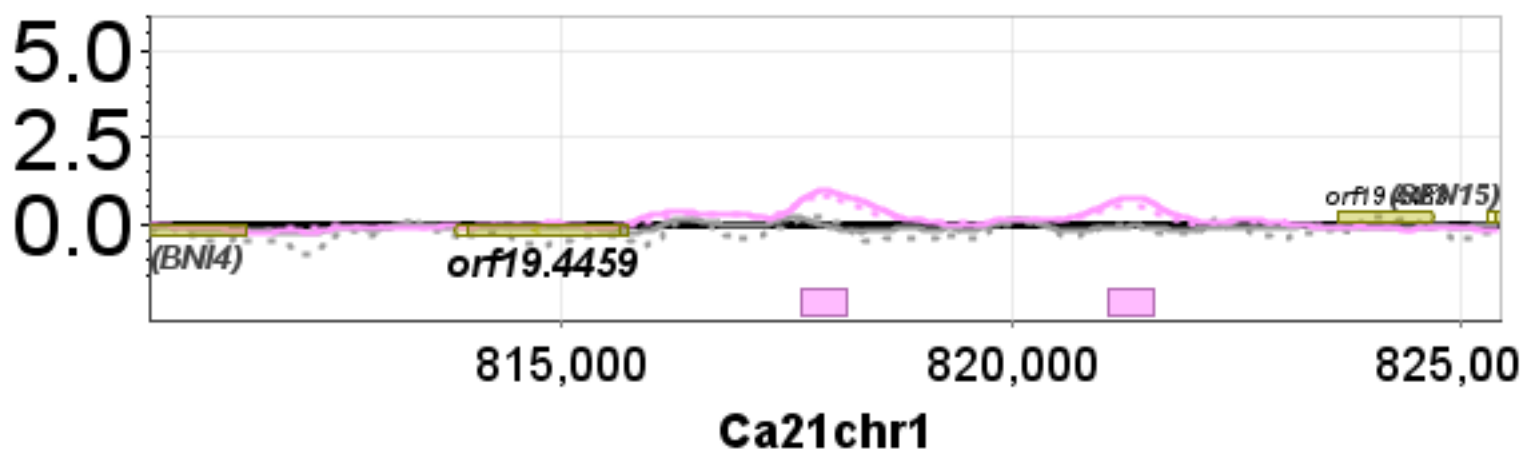

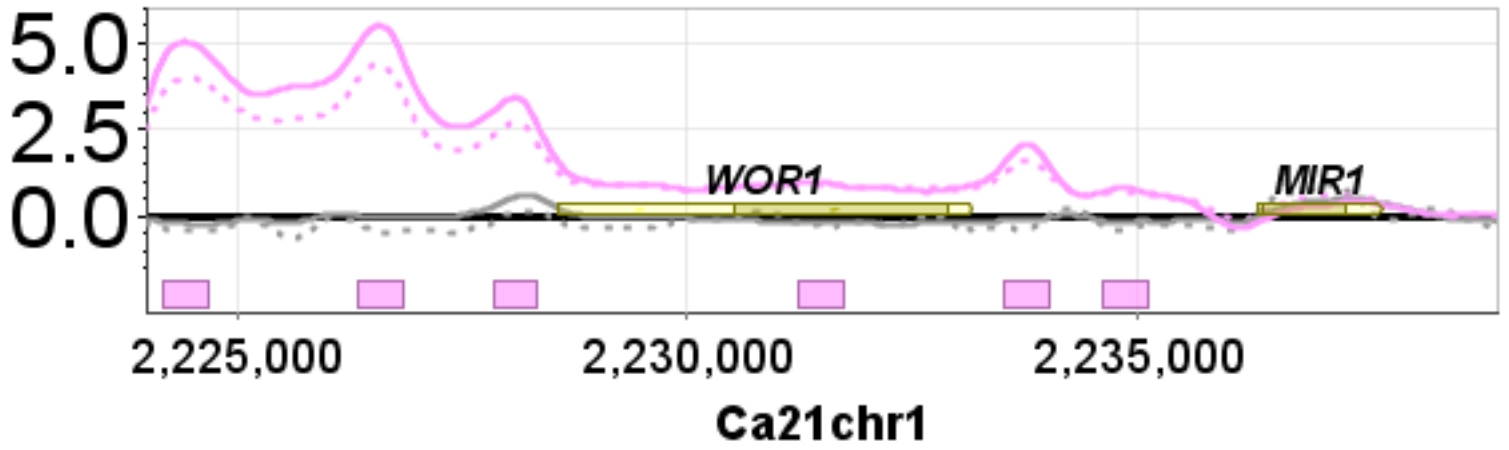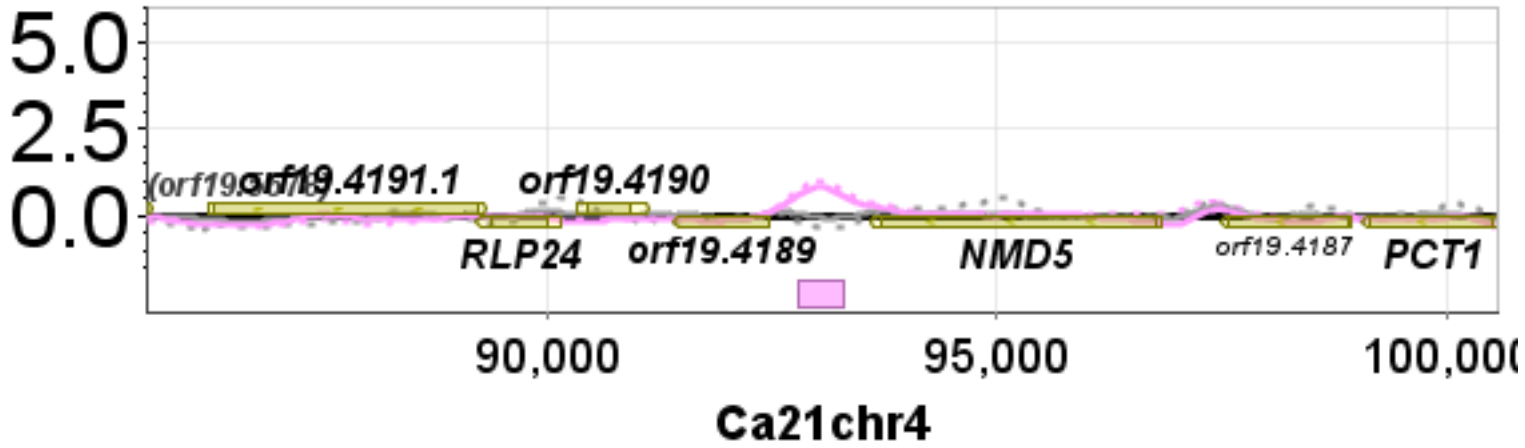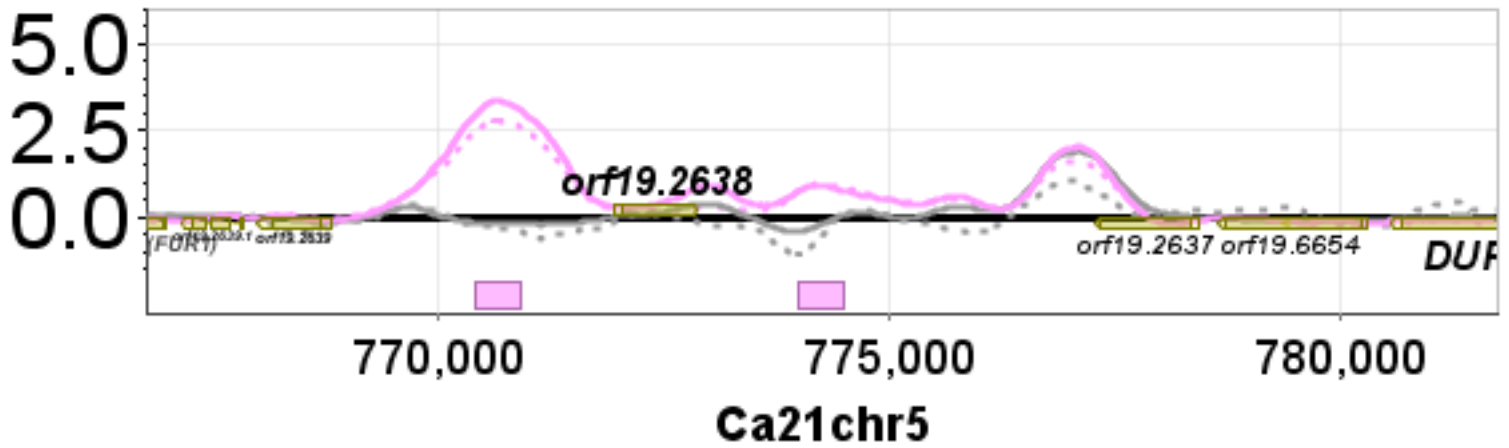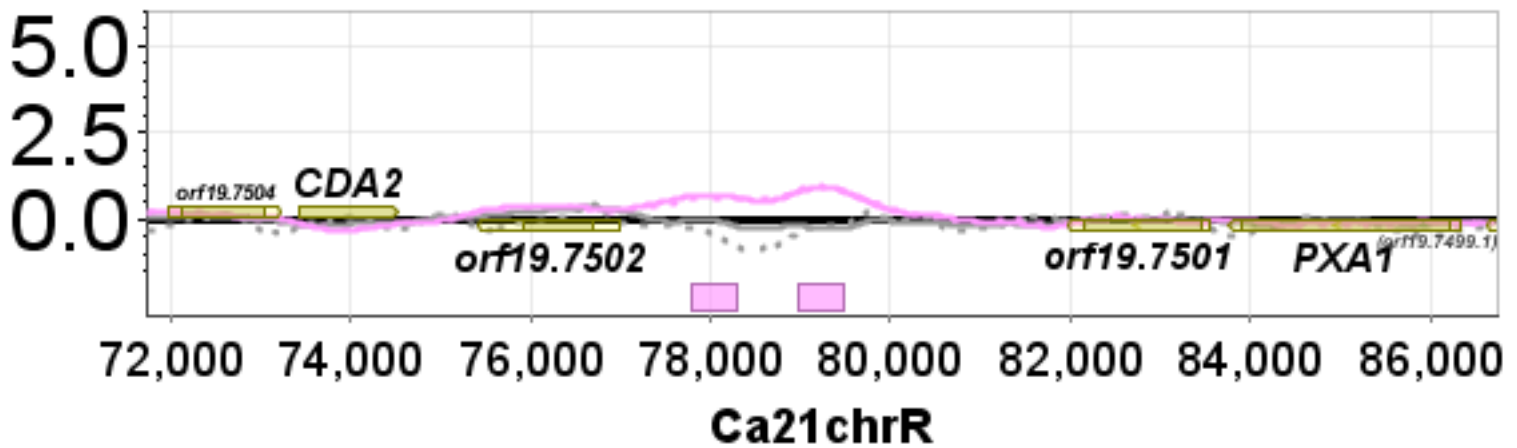

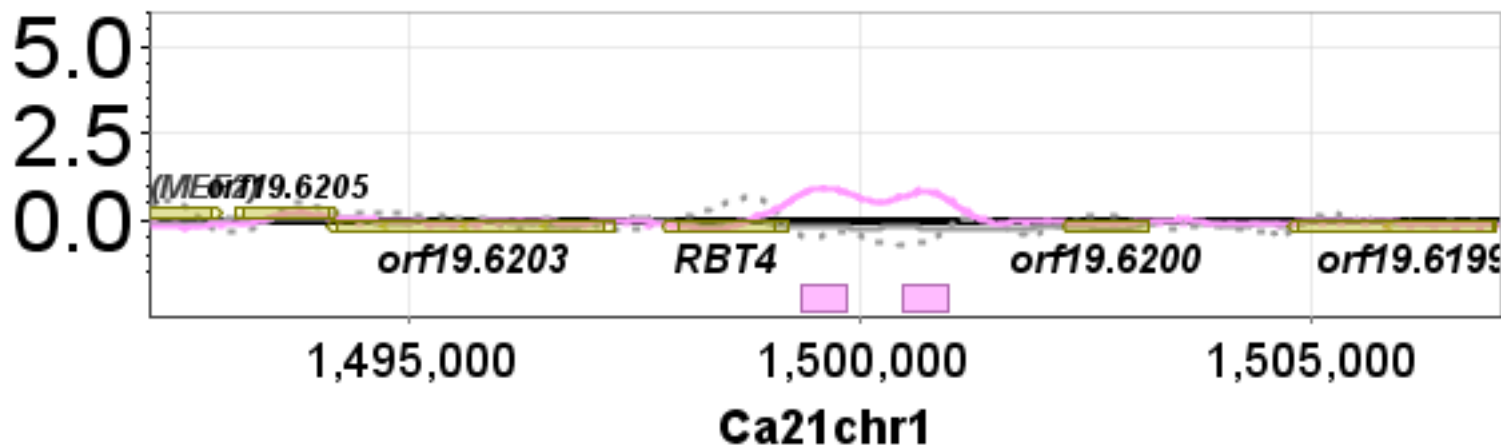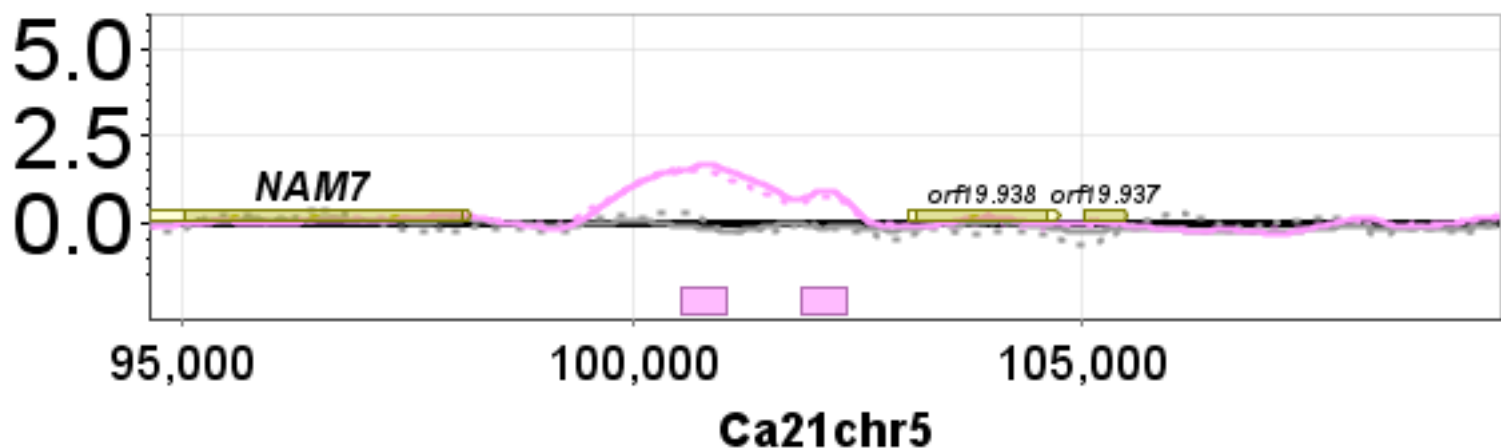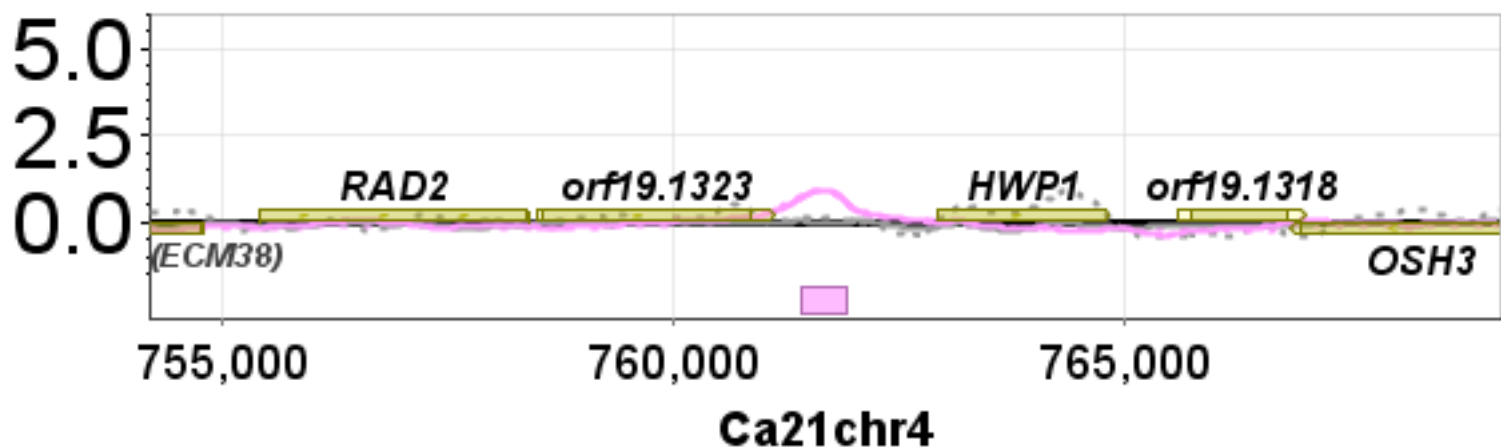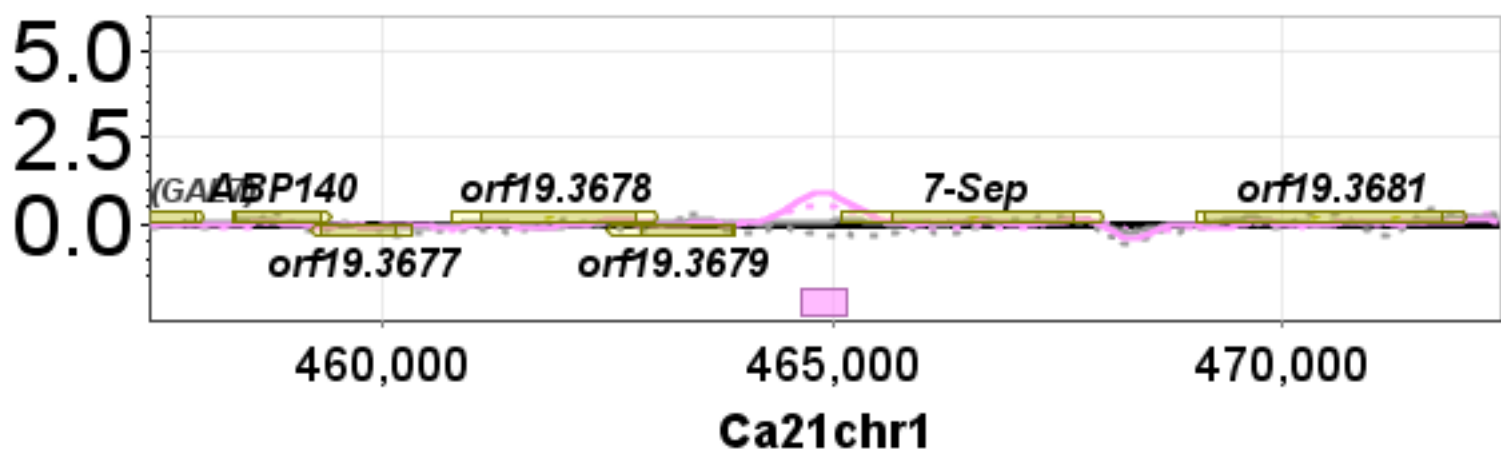

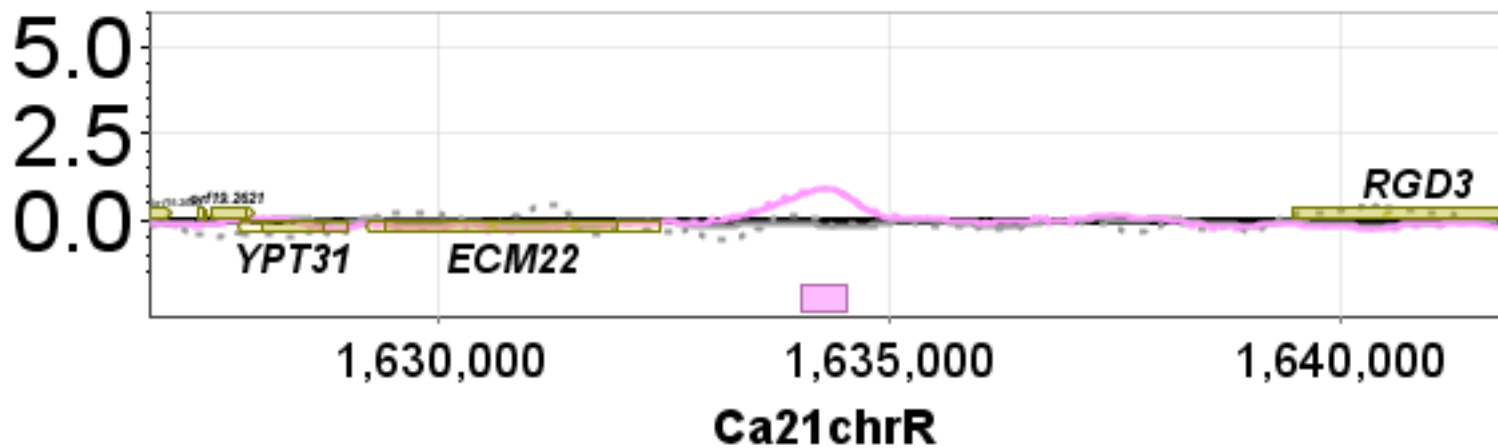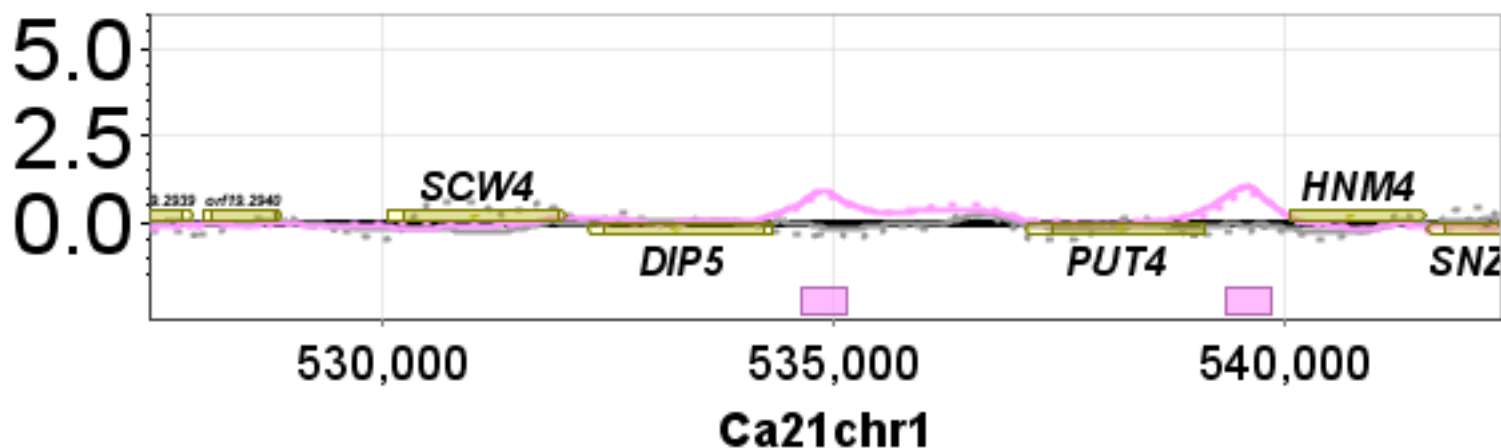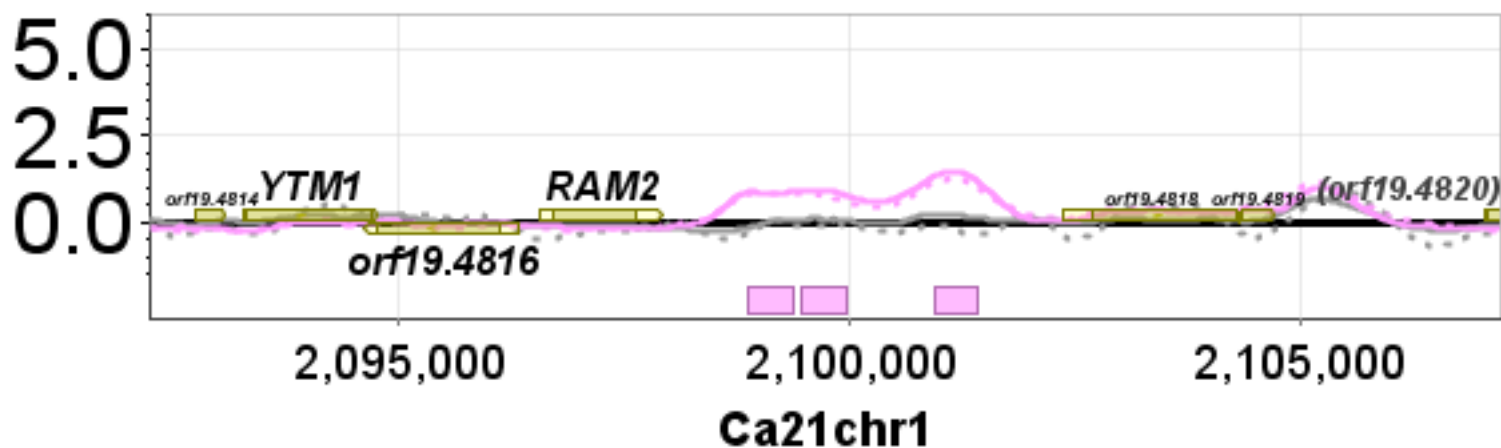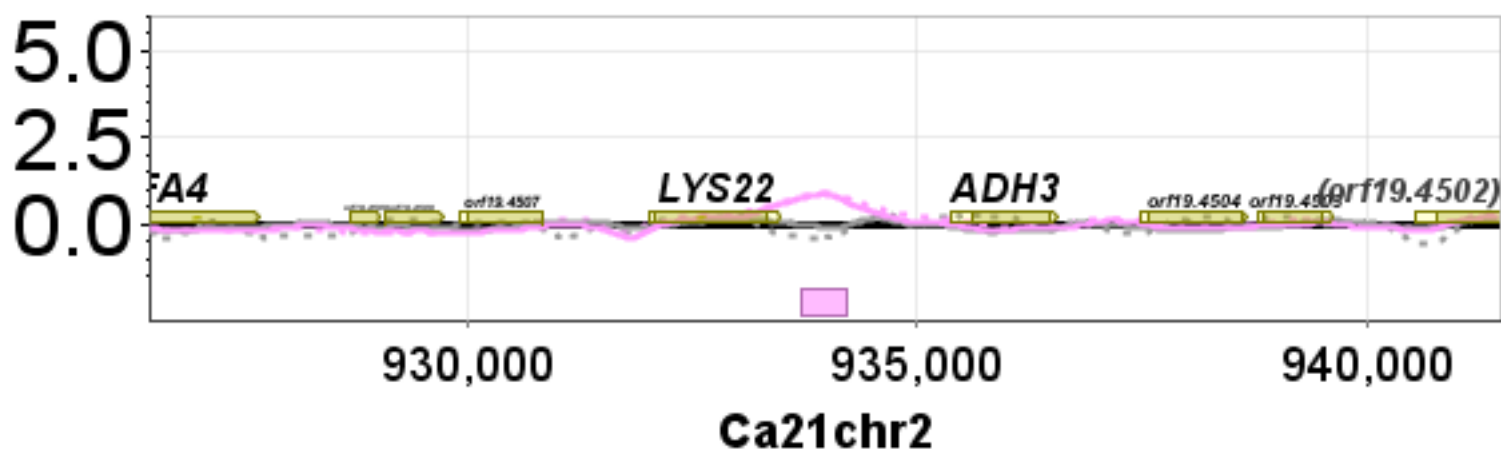



[0.906] Ca21chrR:1696973-1711972 [+] [orf19.3713, orf19.3712, orf19.3714, orf19.3711, ASF1]

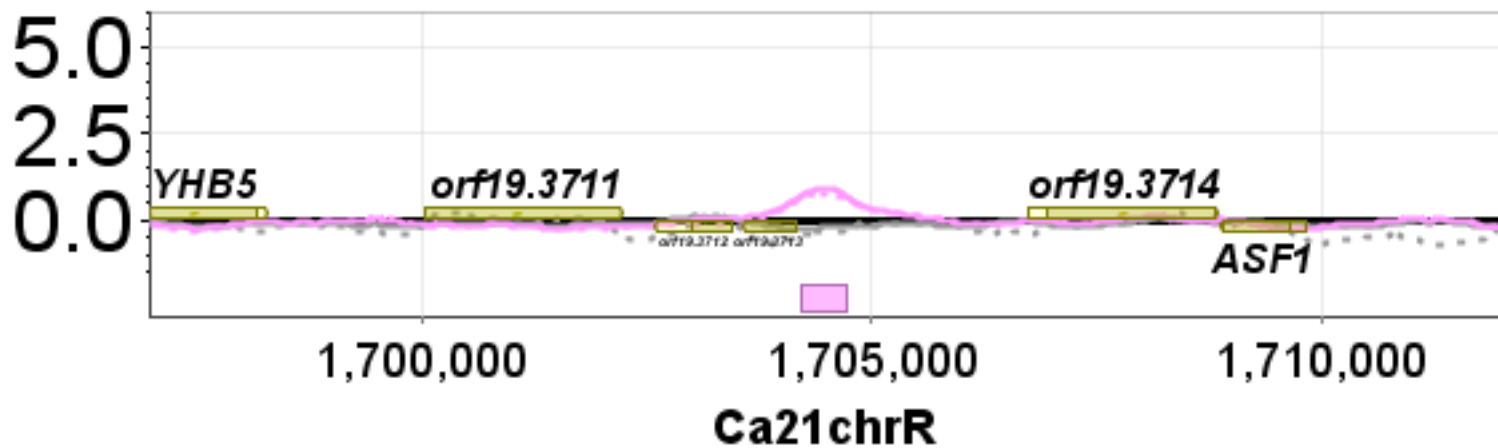

[0.901] Ca21chr1:1731414-1746413 [+] [ntar\_163, orf19.5069, ntar\_164, ntar\_165, ntar\_166]

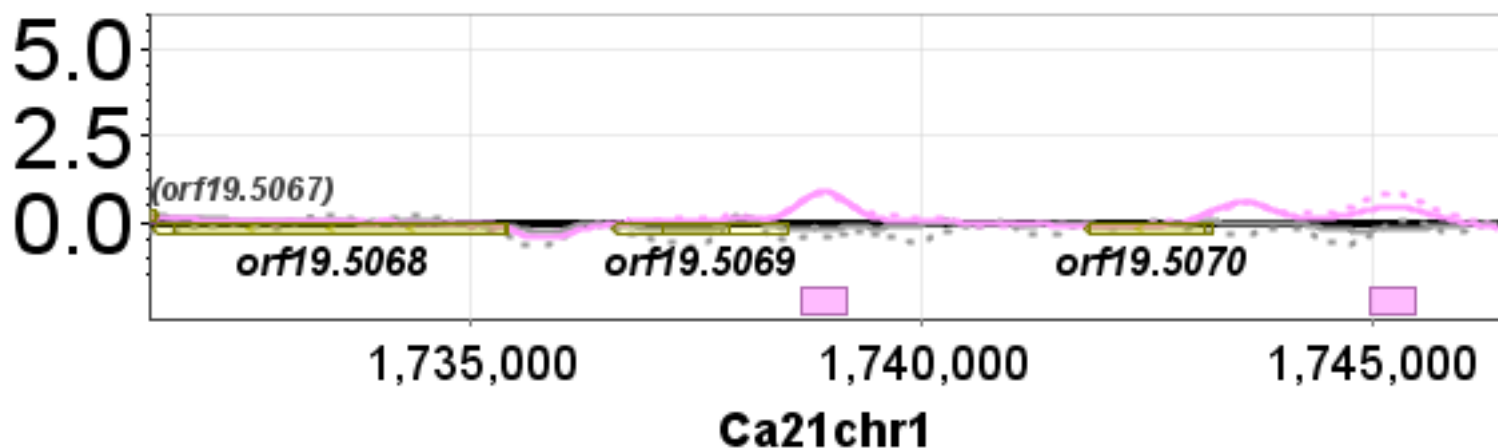

[0.897] Ca21chr5:733261-748260 [+] [orf19.2653, TEF4, CAM1-1, orf19.2650.1, RMS1]

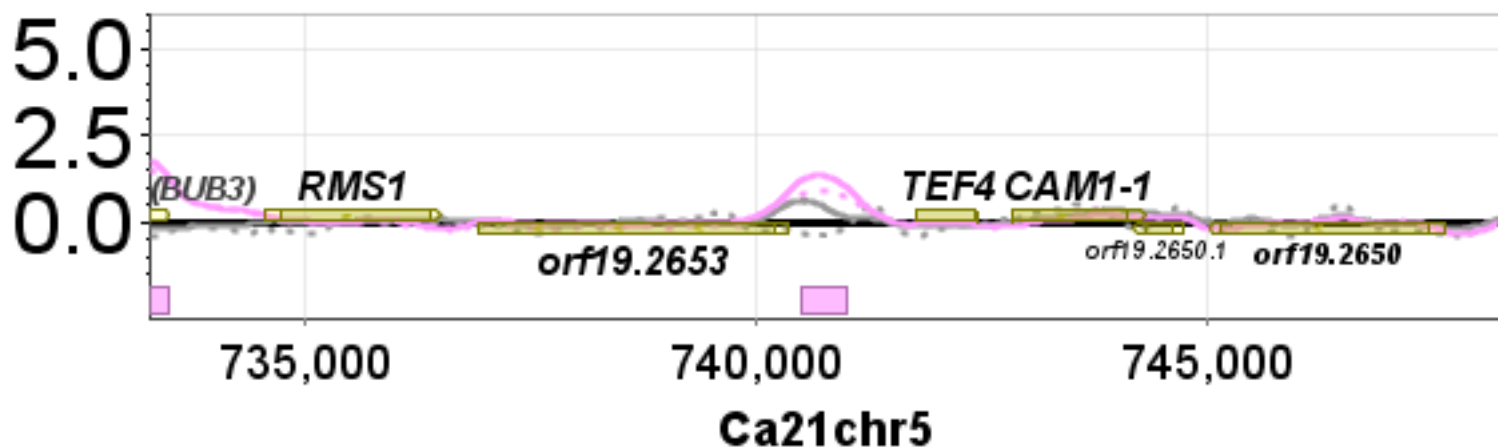

[0.894] Ca21chr3:239510-254509 [+] [ntar\_543, ntar\_544, orf19.3156, orf19.3158, UTP20]

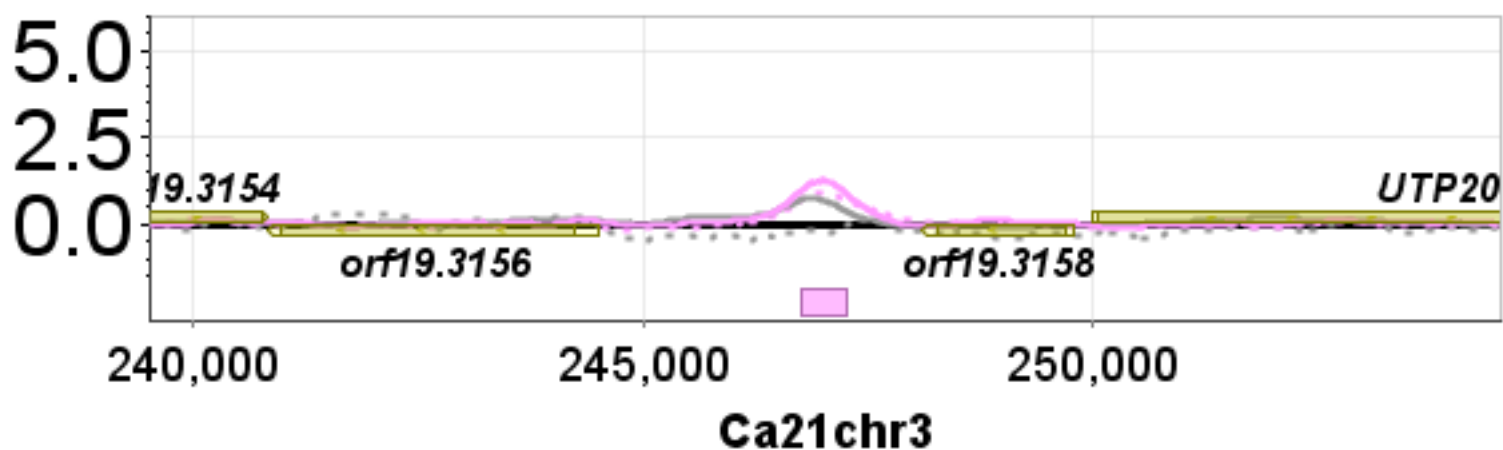

[0.891] Ca21chr2:1141837-1156836 [+] [orf19.6874, VPS35, ts(aga)4, orf19.6873.1, RPS8A]

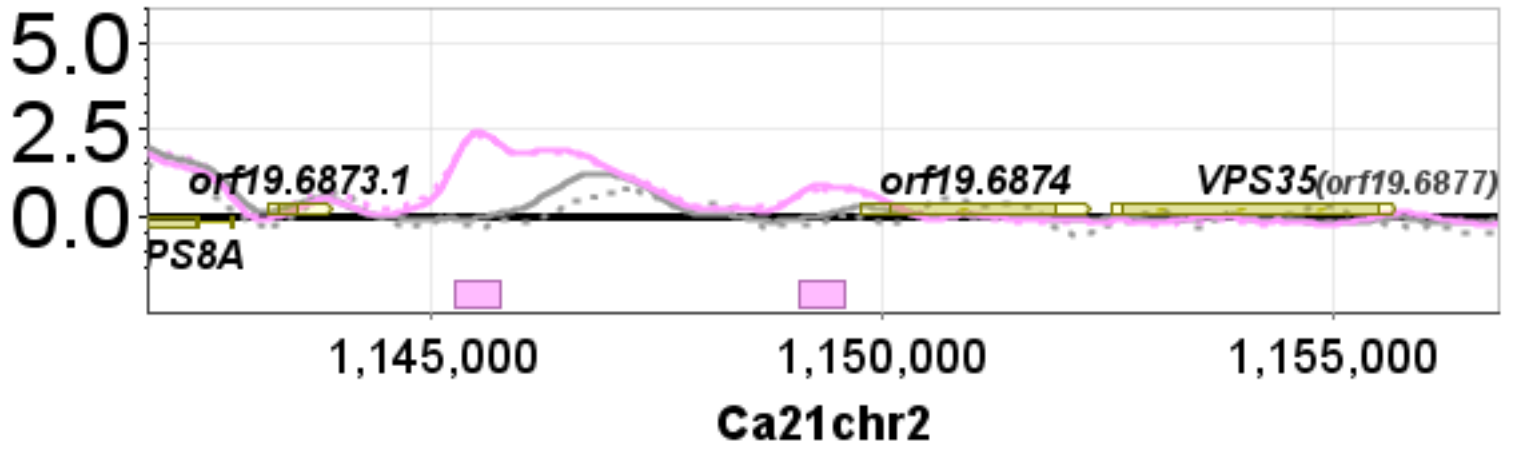

[0.889] Ca21chr7:621486-636485 [+] [ENA21, PMT1, orf19.5169, LIP9, TAF19]

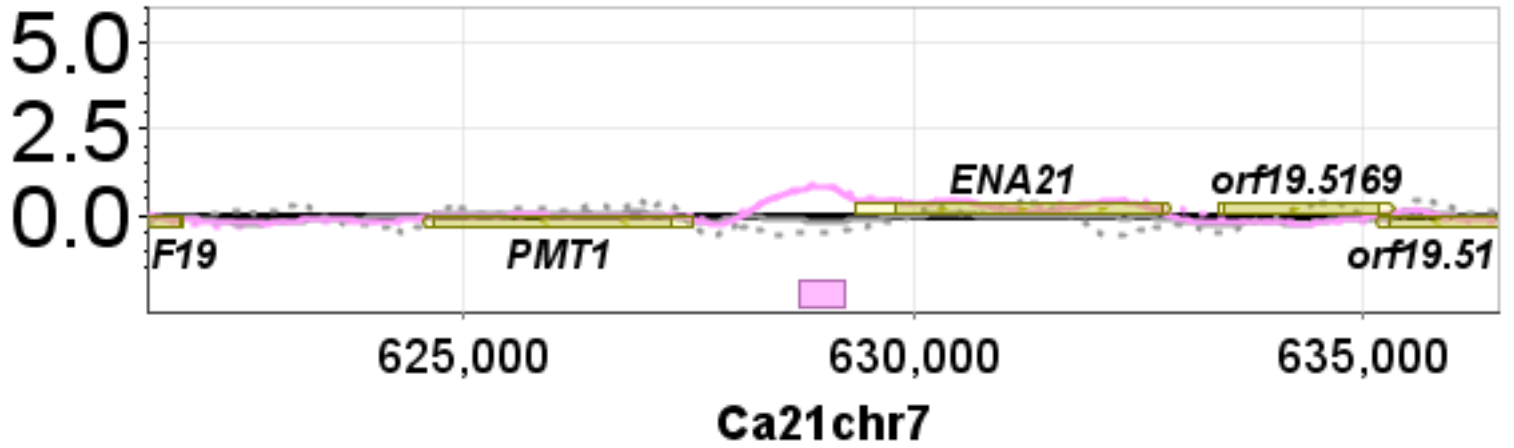

[0.885] Ca21chr1:2395165-2410164 [+] [orf19.2332, orf19.2333, ADA2, RPS17B, BIG1]

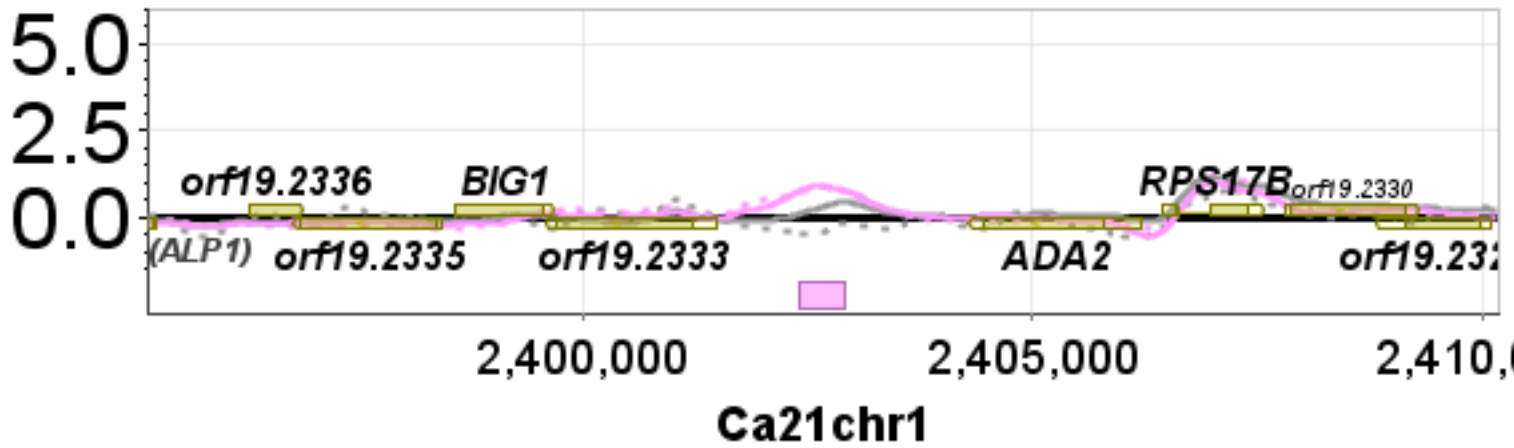

[0.884] Ca21chr1:2903087-2918086 [+] [ntar\_262, STP2, orf19.4960, orf19.4959, orf19.4962]

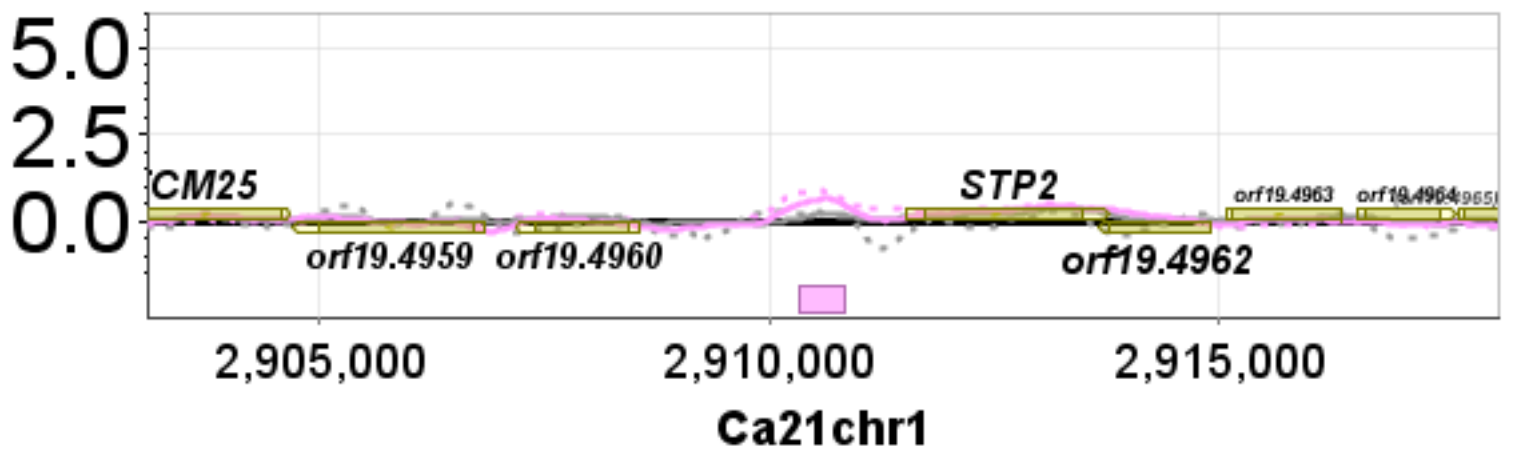

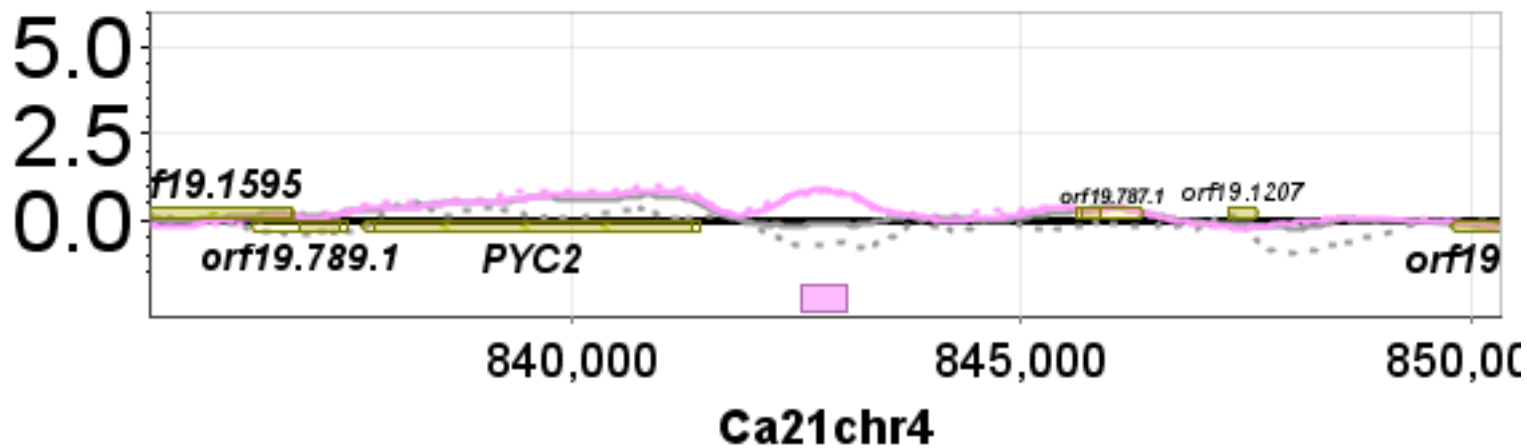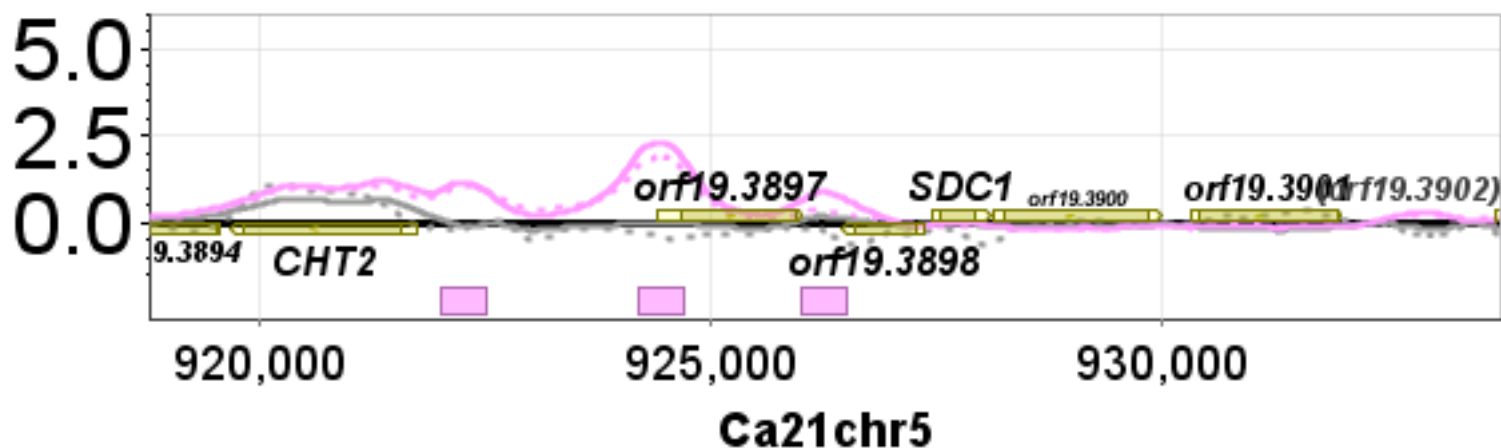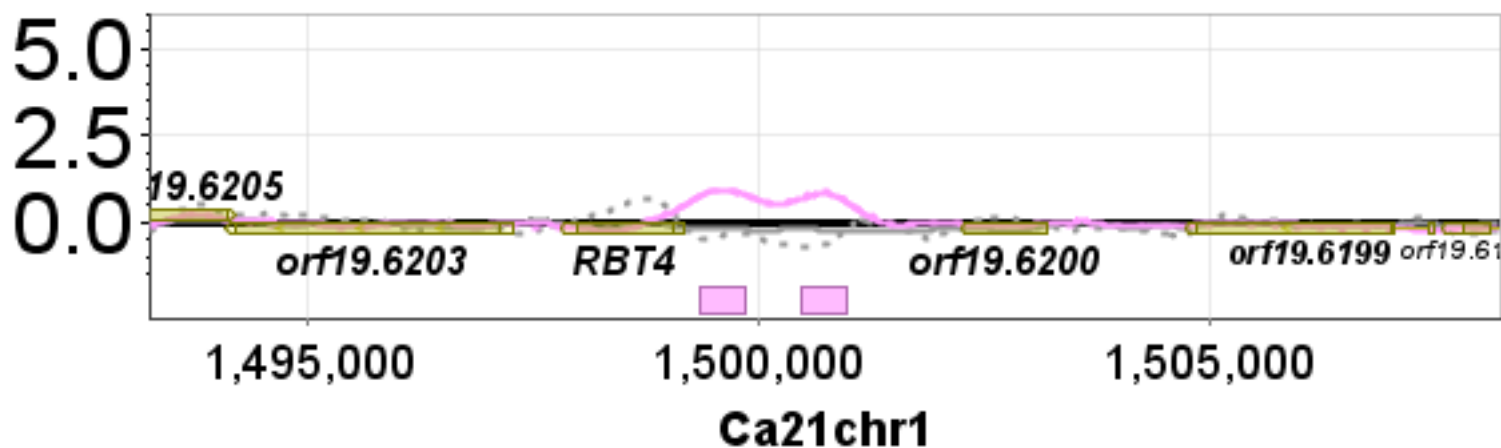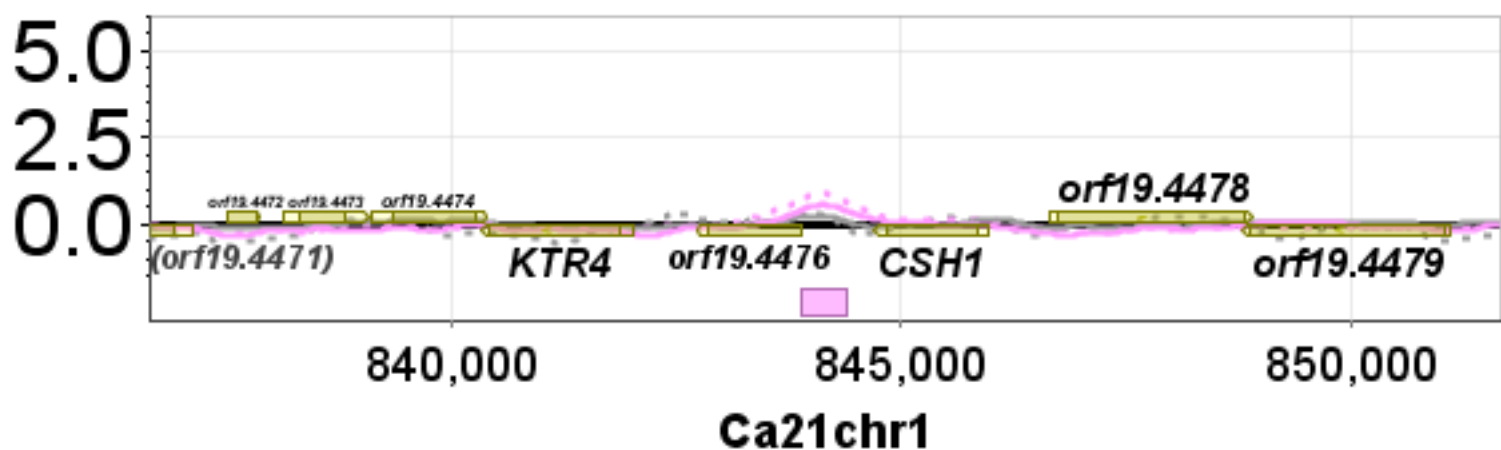

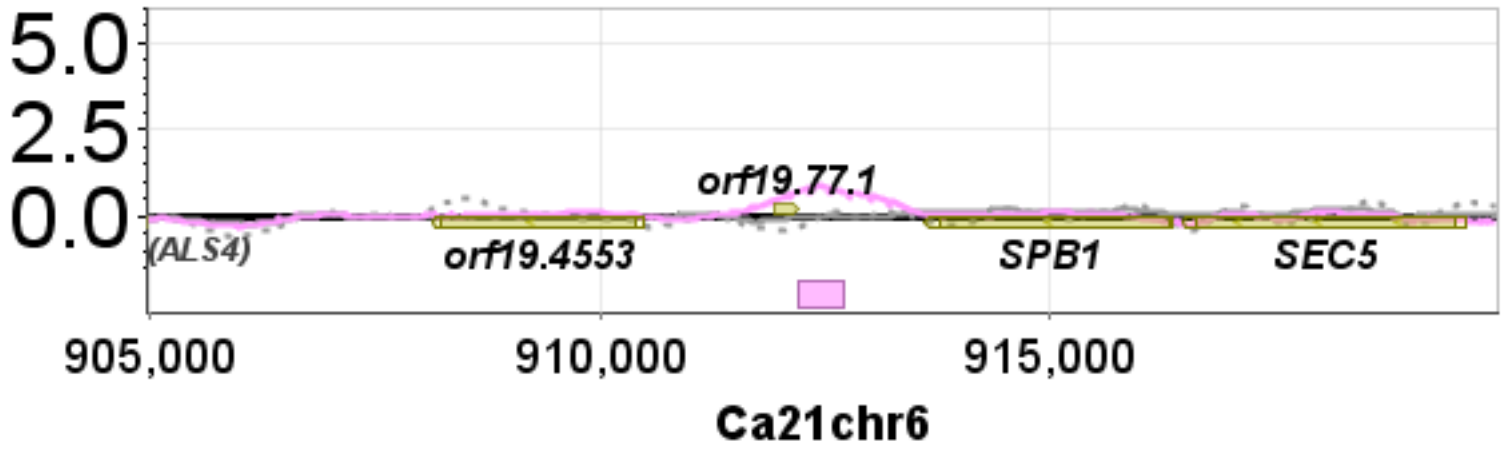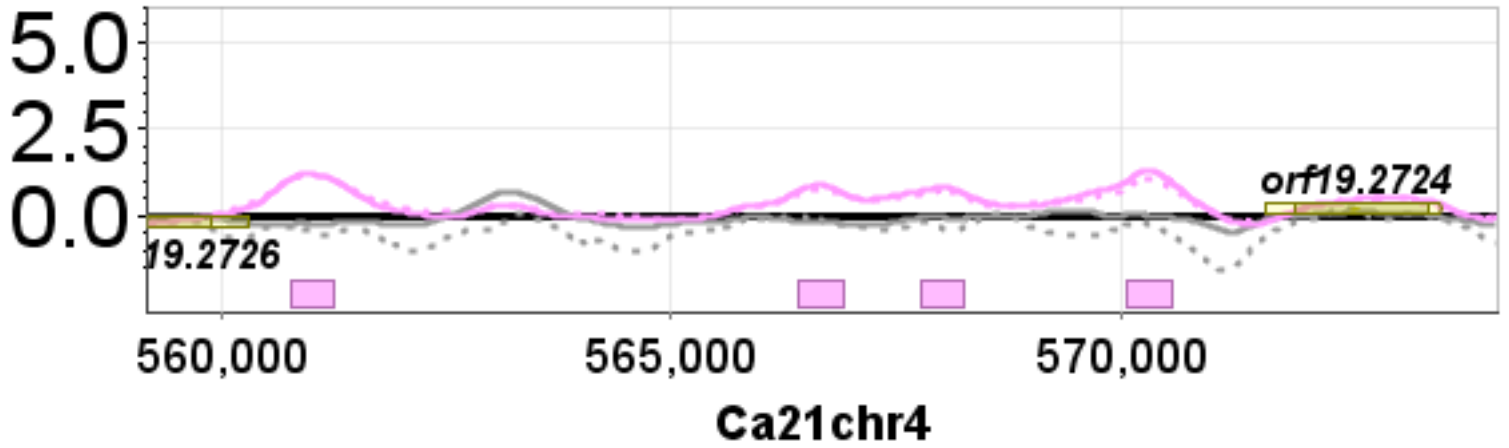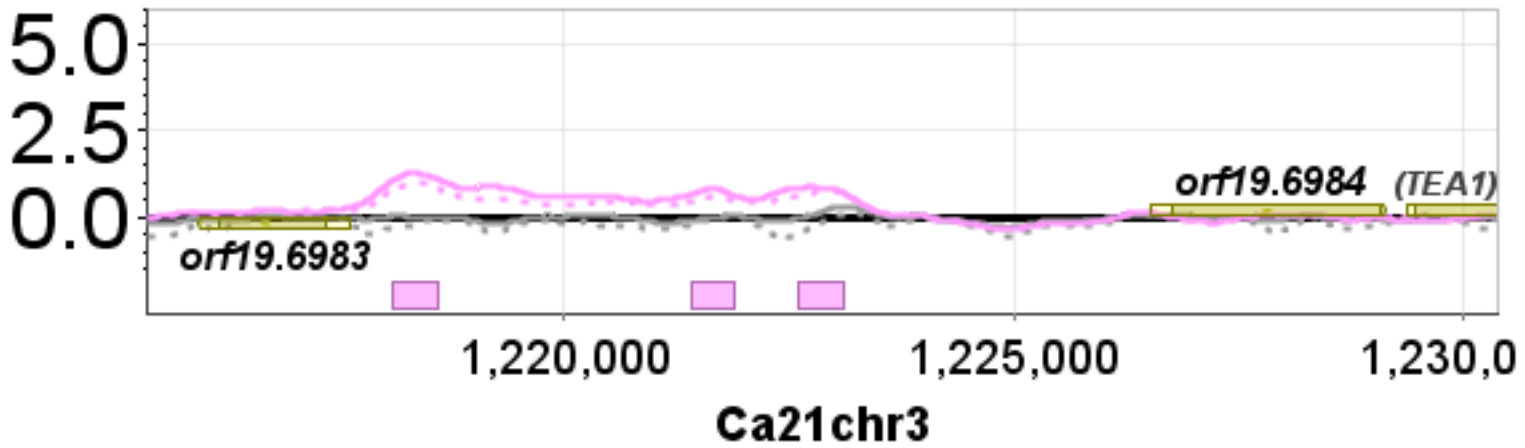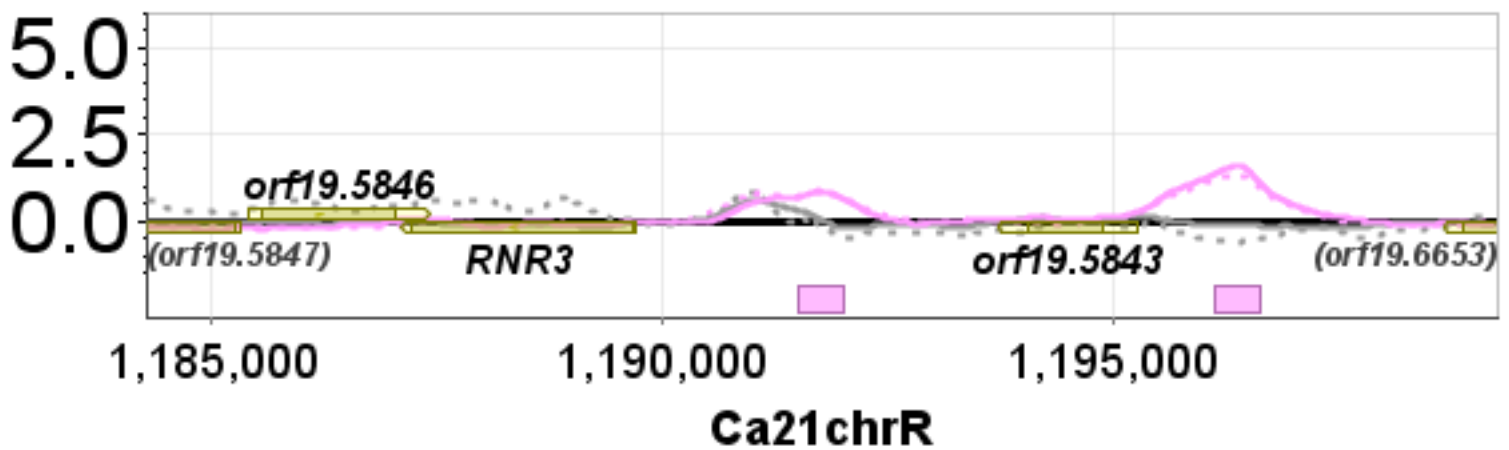

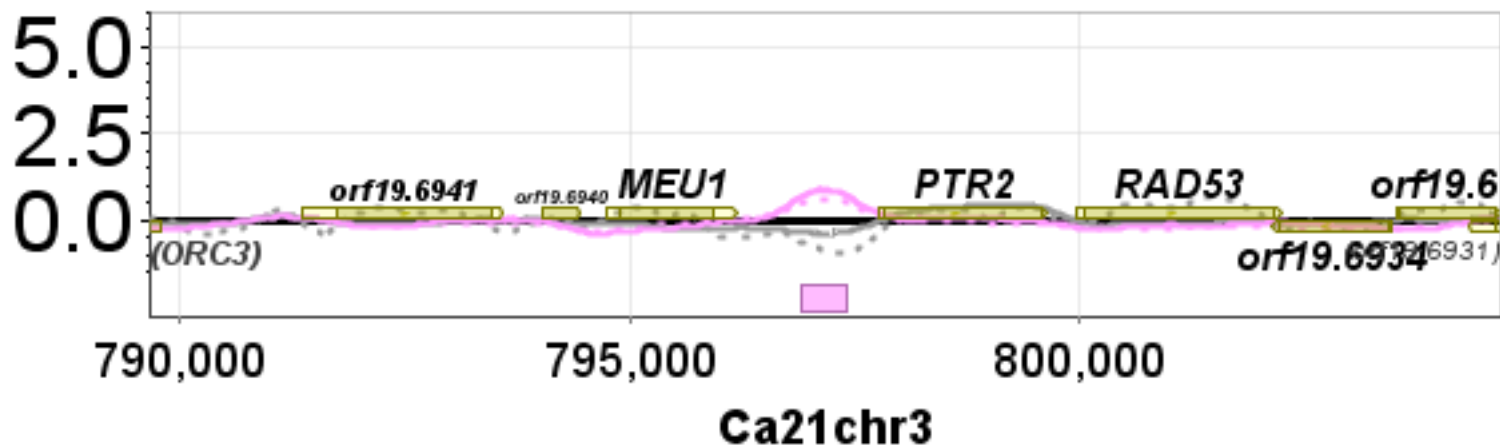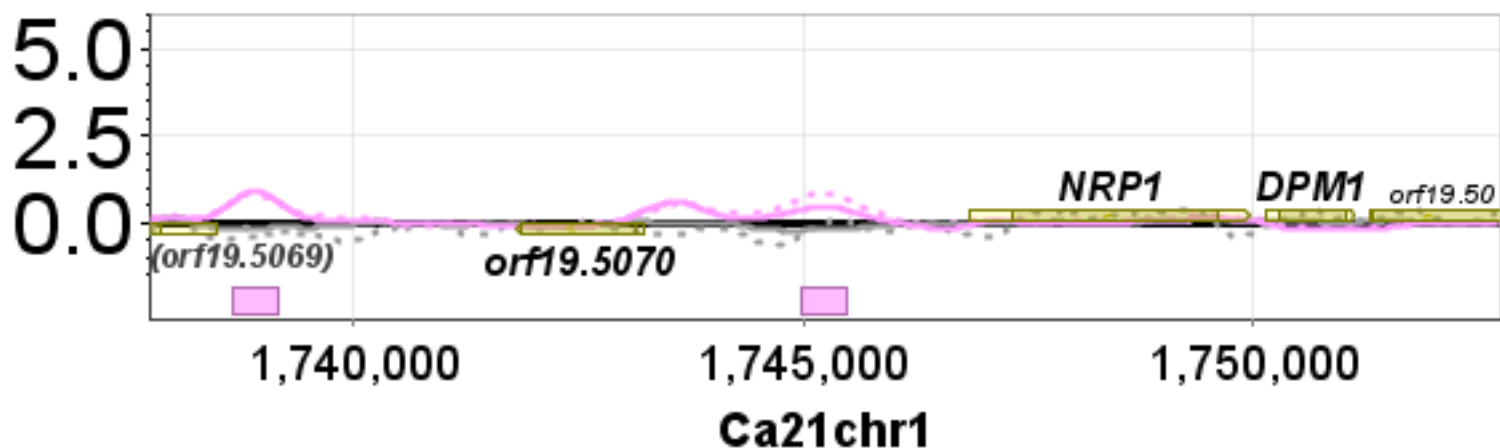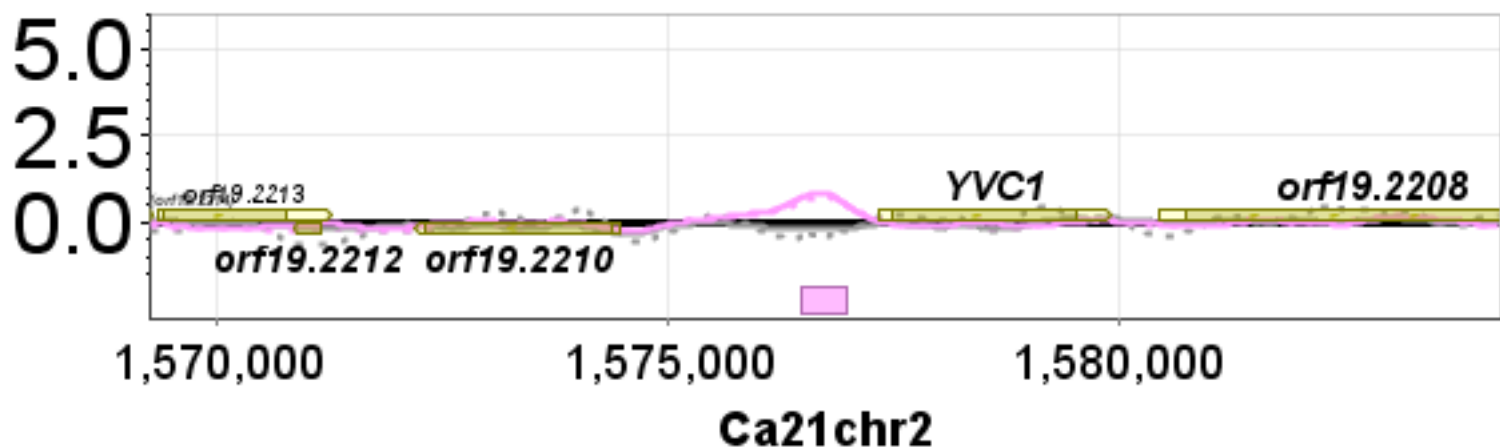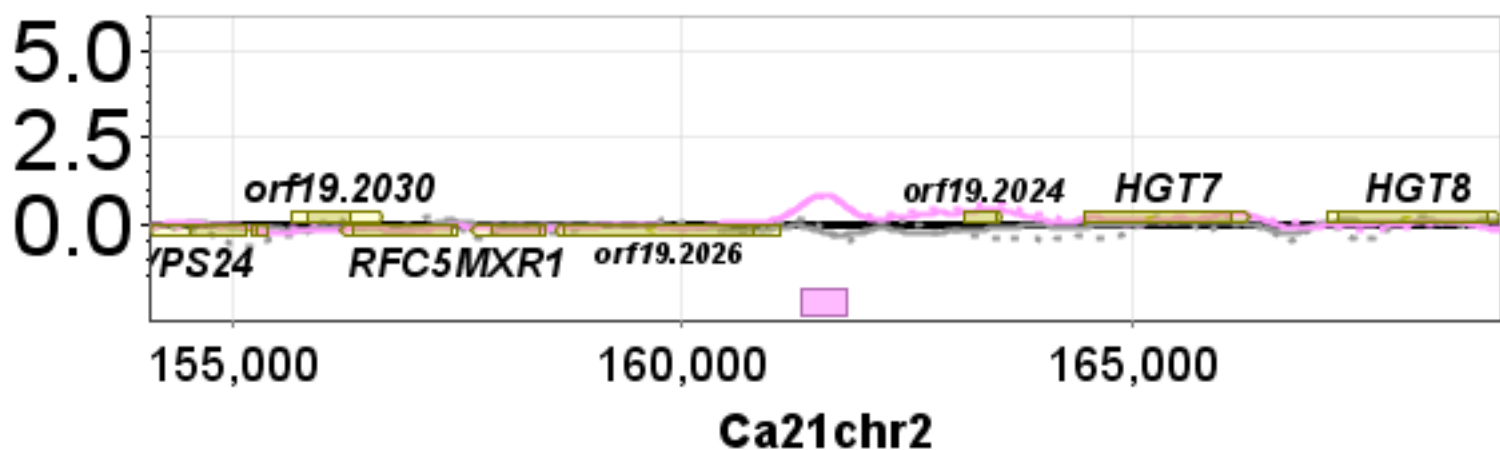

[0.852] Ca21chr3:1246709-1261708 [+] [orf19.6996, orf19.6995, BAT22, orf19.6997, GTT1]

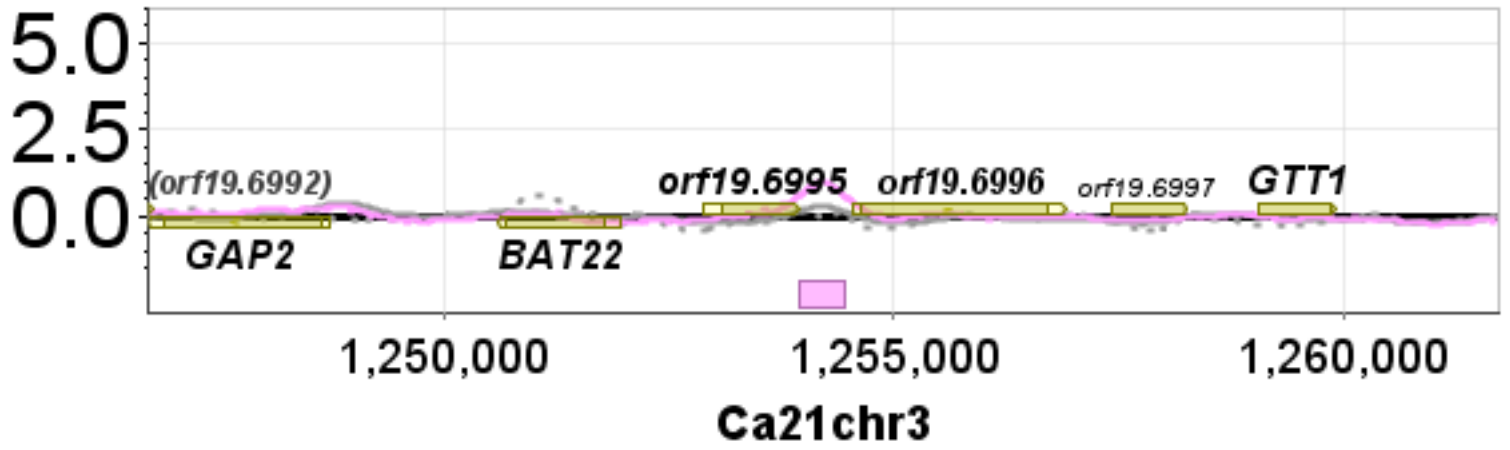

[0.847] Ca21chr3:945405-960404 [+] [TEC1, orf19.5910]

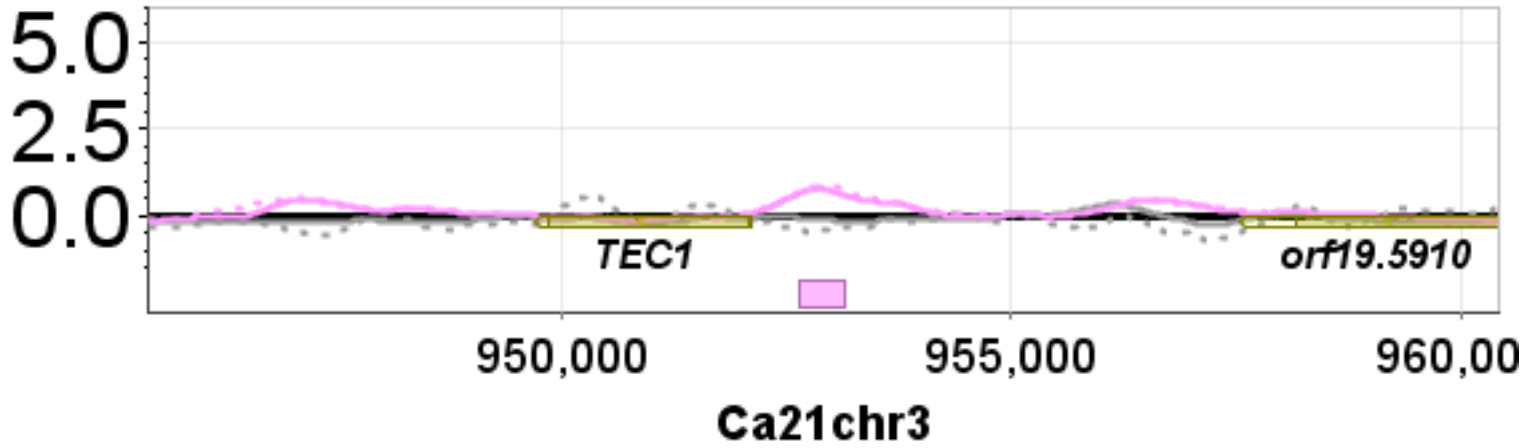

[0.845] Ca21chr1:1228215-1243214 [+] [orf19.2457, orf19.2458, orf19.2455, ntar\_121, orf19.2459]

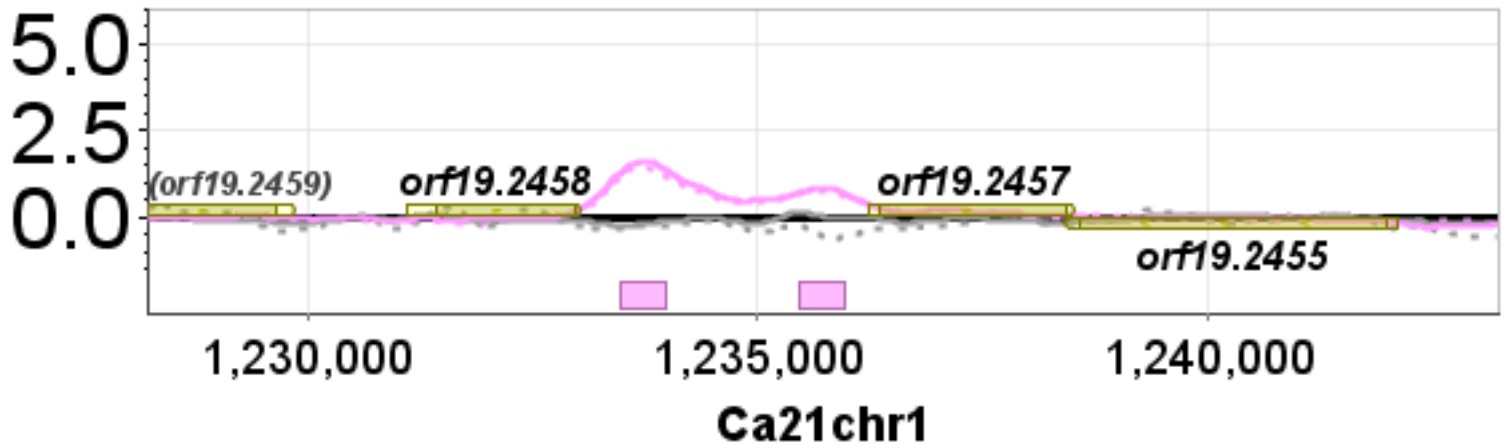

[0.845] Ca21chr3:331486-346485 [+] [TOS1, orf19.1691, orf19.1687, ntar\_553, ntar\_552]

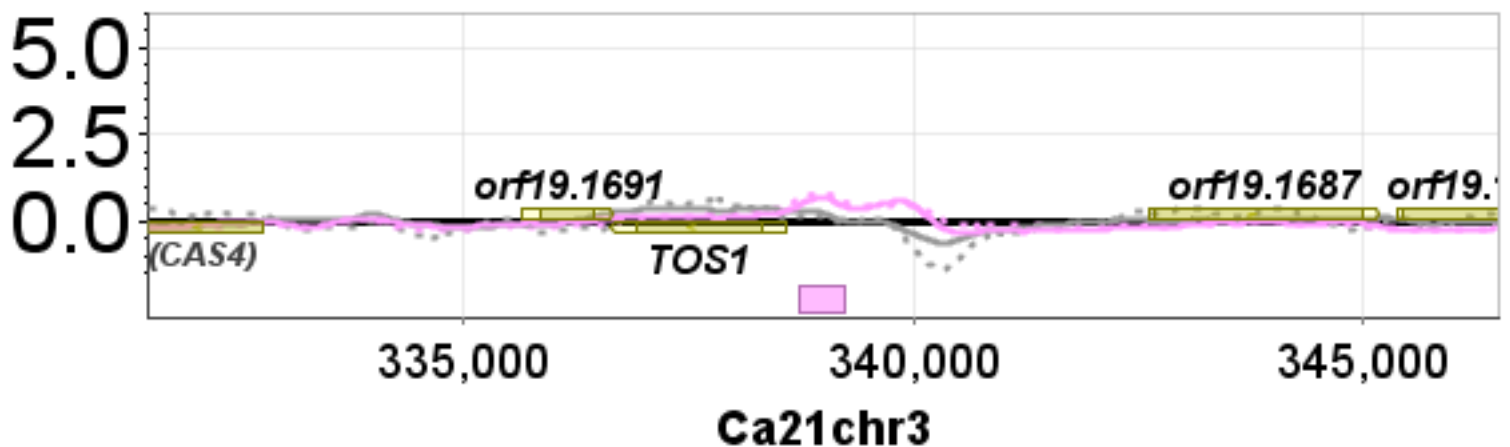

[0.843] Ca21chr1:2091614-2106613 [+] [RAM2, orf19.4816, ntar\_197, orf19.4818, orf19.4819]

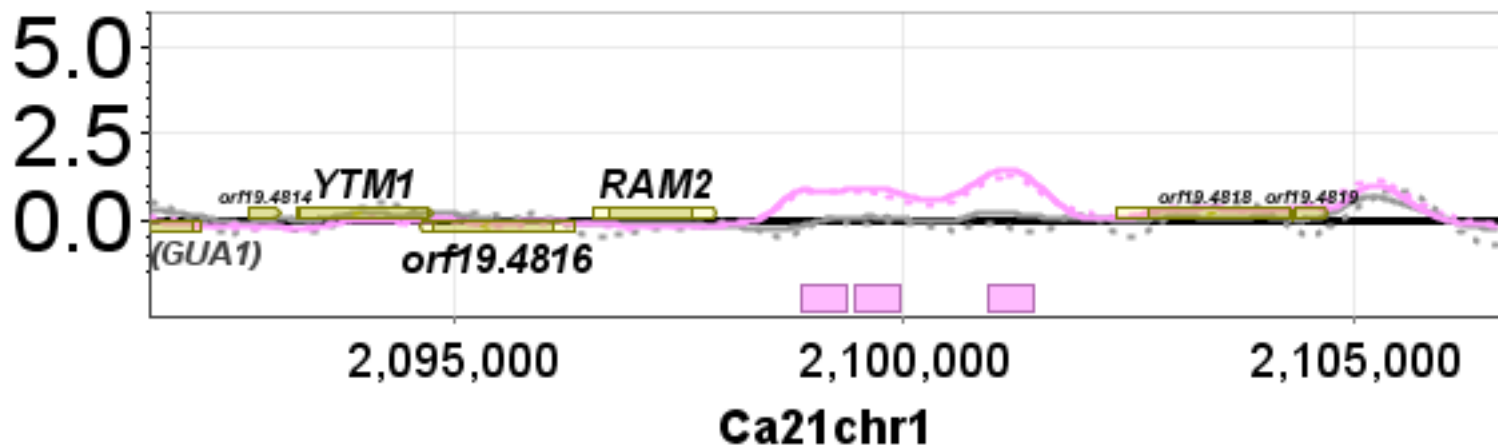

[0.841] Ca21chr7:139608-154607 [+] [ntar\_1062, orf19.7041, orf19.7042, orf19.7043, orf19.7038]

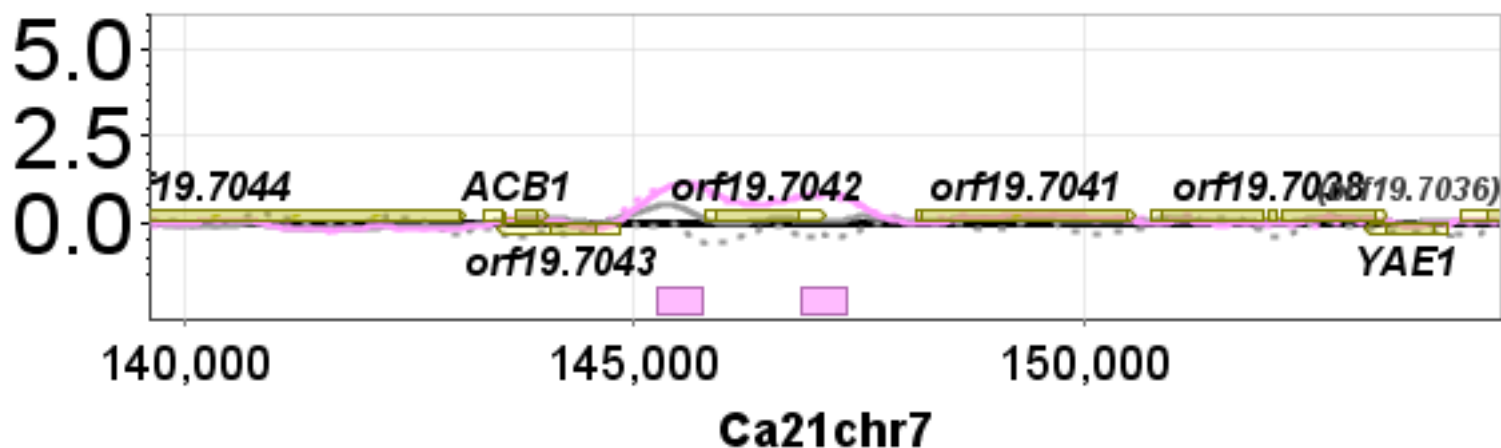

[0.836] Ca21chr4:1192980-1207979 [+] [FGR6-10, ntar\_817, ntar\_816]

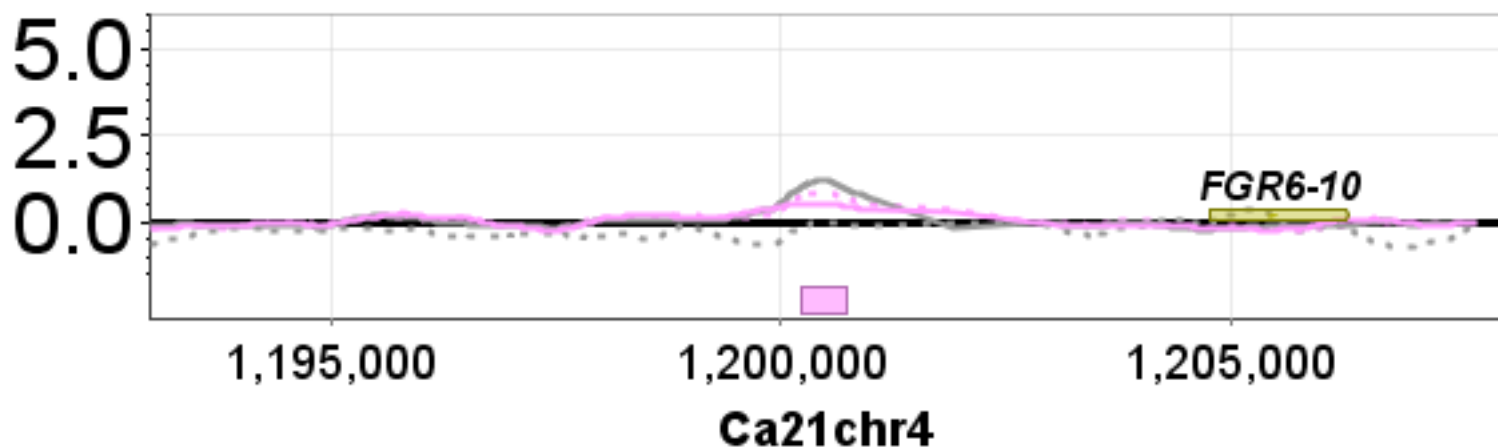

[0.834] Ca21chr4:207392-222391 [+] [HGT17, RAT1, MLP1, RPL40B, orf19.4680]

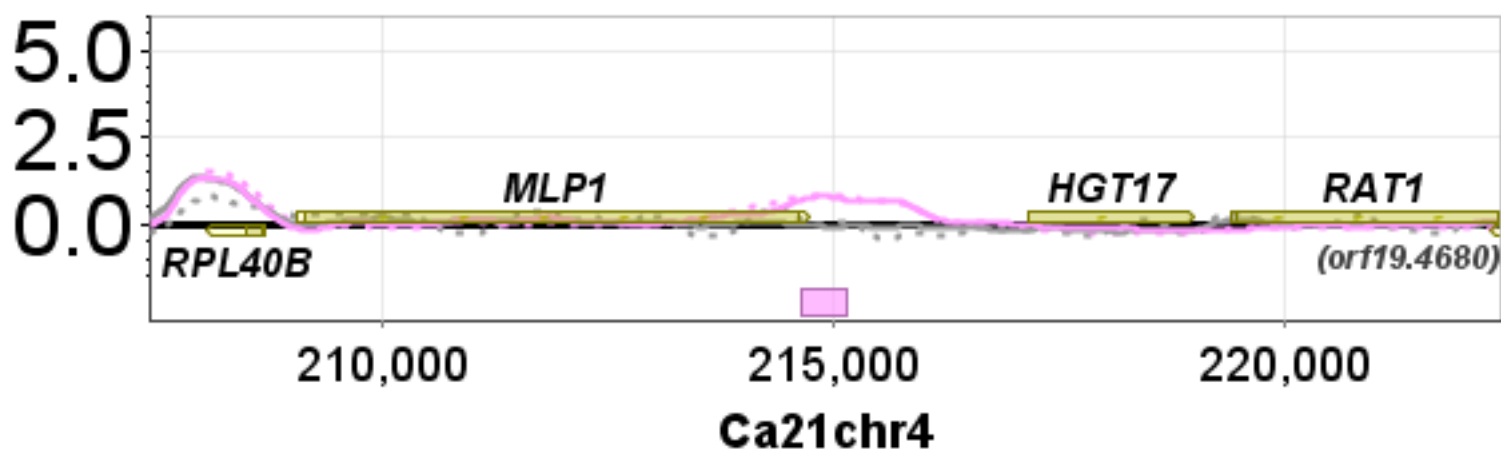

[0.83] Ca21chr2:1194506-1209505 [+] [ntar\_397, orf19.5210, orf19.5210.1, orf19.5209, IDP1]

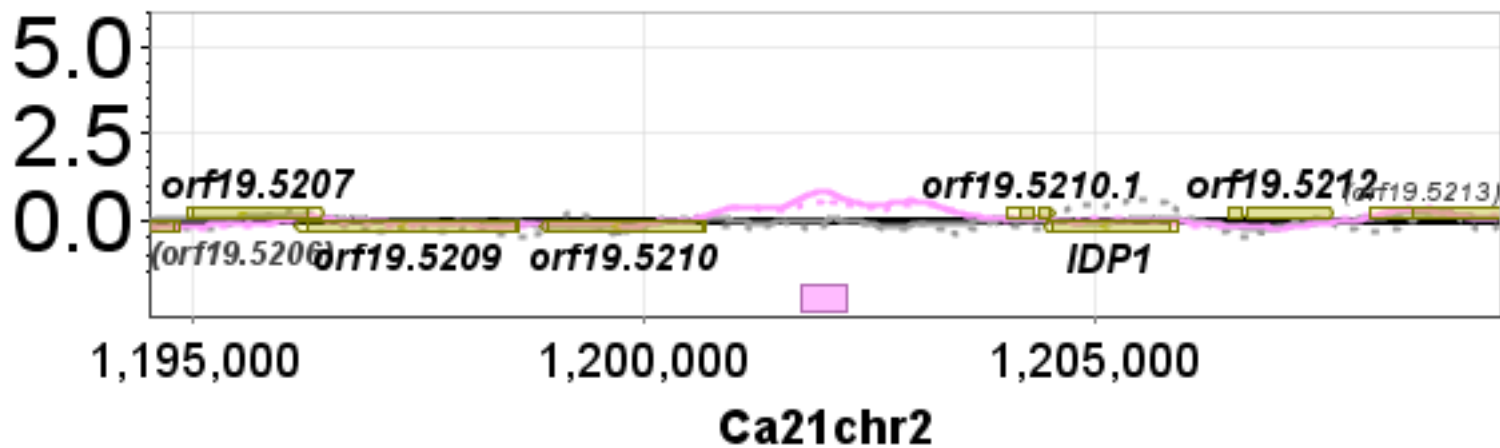

[0.821] Ca21chr2:2140171-2155170 [+] [FGR6-4, ntar\_513, ntar\_512, ntar\_511]

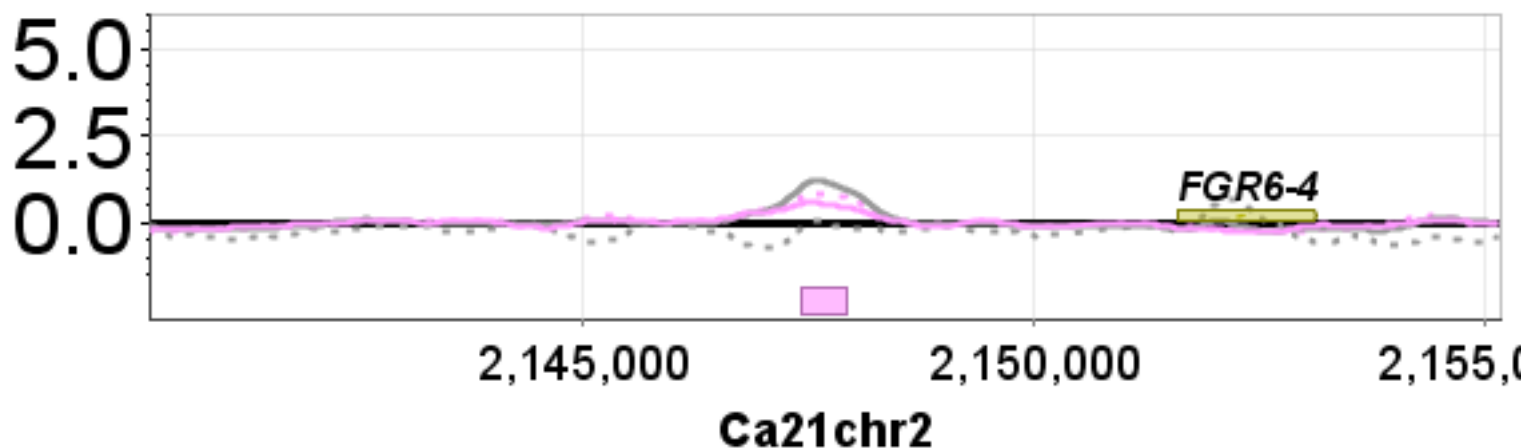

[0.818] Ca21chr3:1214162-1229161 [+] [ntar\_633, orf19.6983, orf19.6984, ntar\_632]

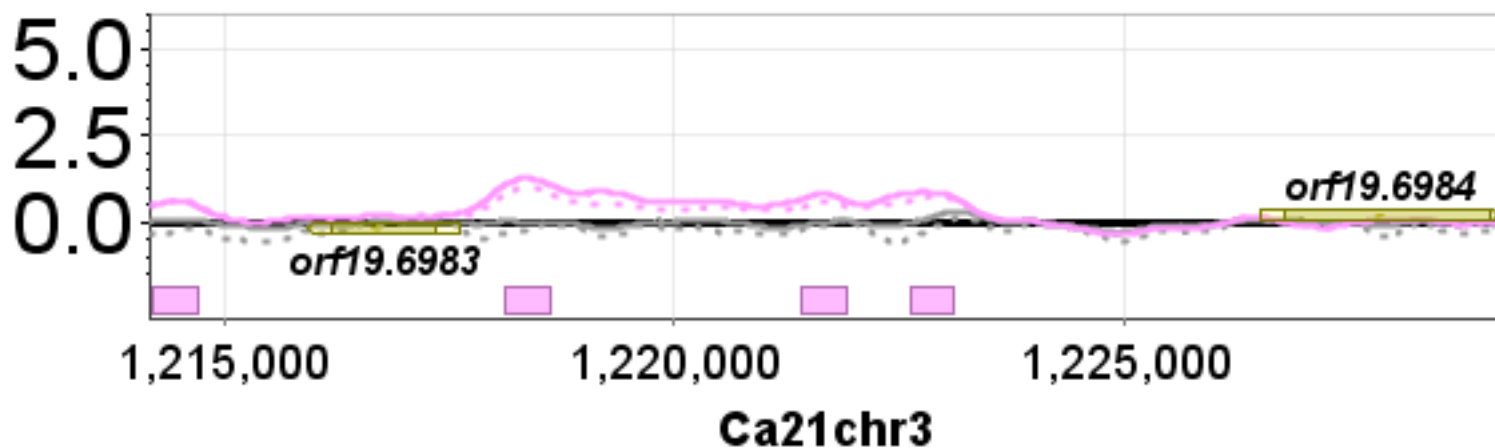

[0.817] Ca21chr3:1193246-1208245 [+] [orf19.6979, orf19.6978, GPI1, ntar\_631, ntar\_630]

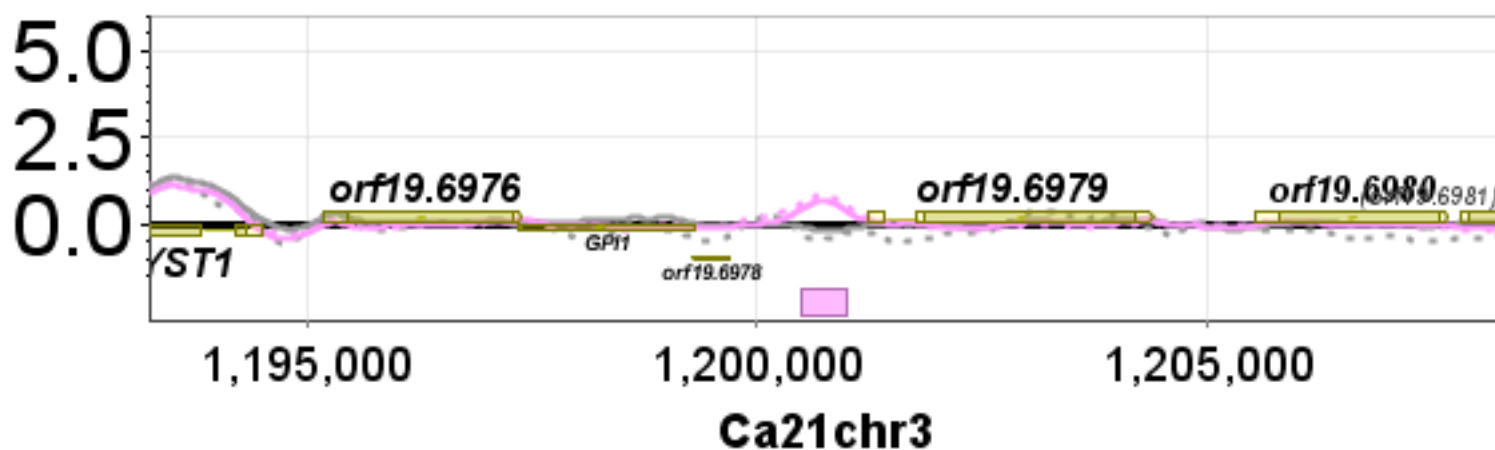



[0.813] Ca21chr1:2227364-2242363 [+] [MIR1, orf19.4886, WOR1, ECM21]

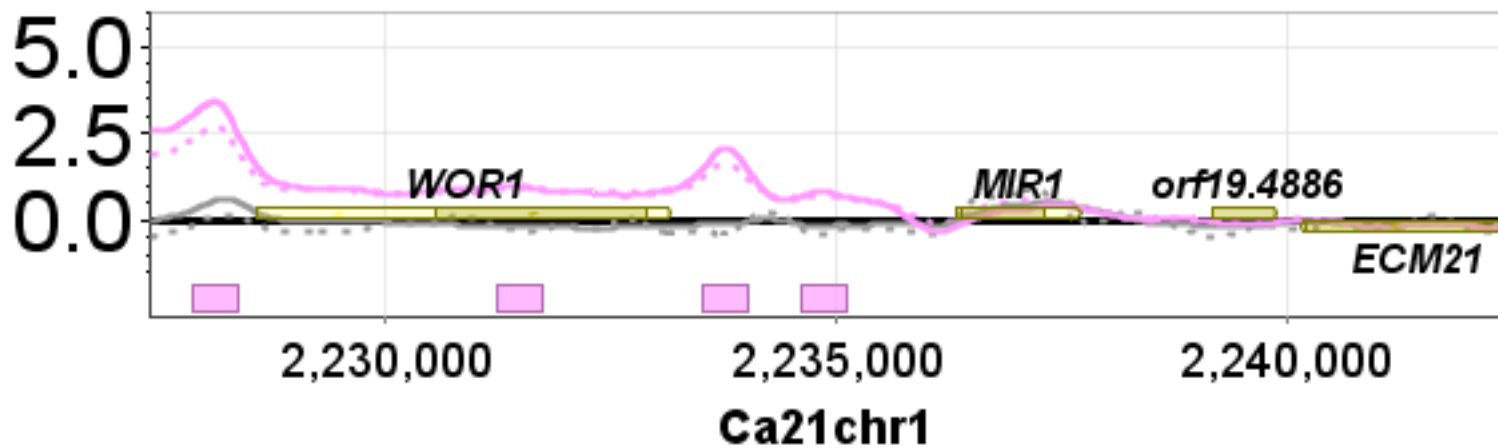

[0.805] Ca21chr1:705225-720224 [+] [EHT1, ntar\_74, orf19.3041, TPS2, ntar\_73]

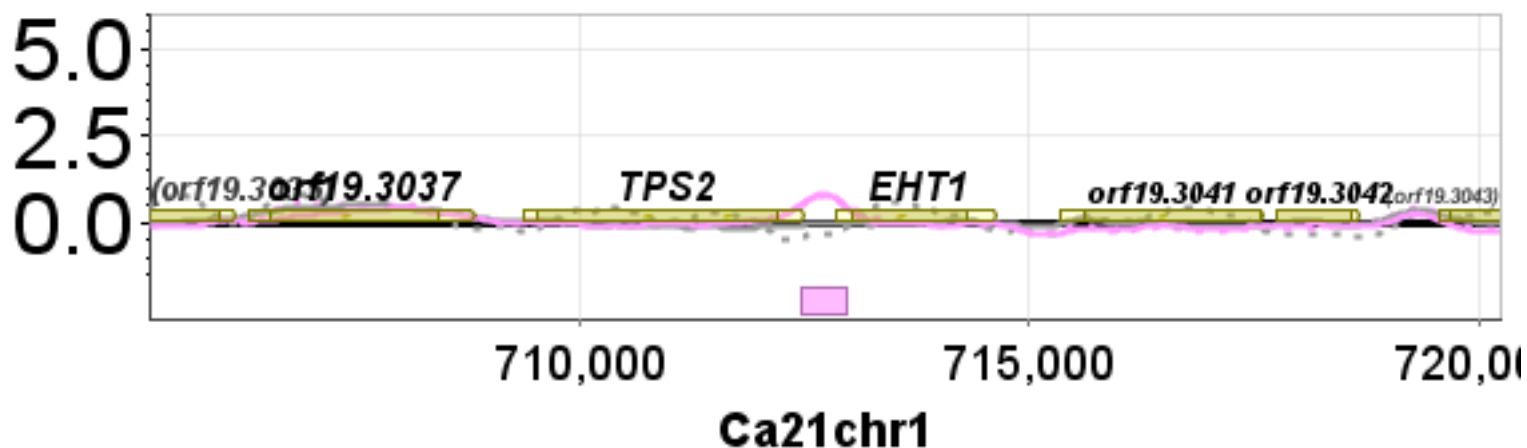

[0.804] Ca21chr1:1964578-1979577 [+] [orf19.4763, orf19.4764, HST1, orf19.4760, COX5]

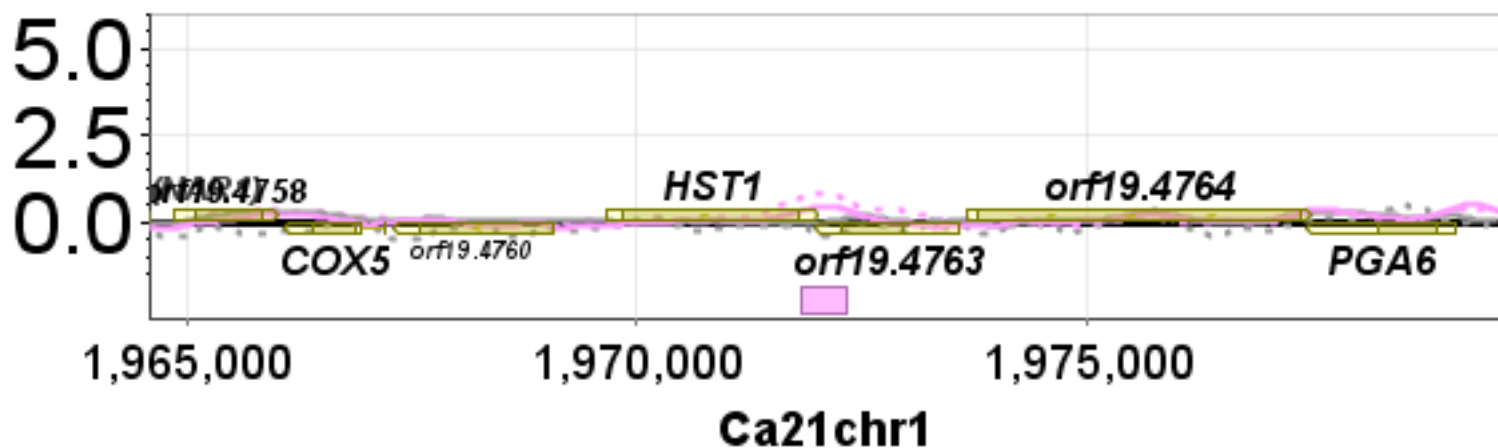

[0.802] Ca21chr5:272400-287399 [+] [GPR1, AUR1, orf19.1943, orf19.1946, SGE1]

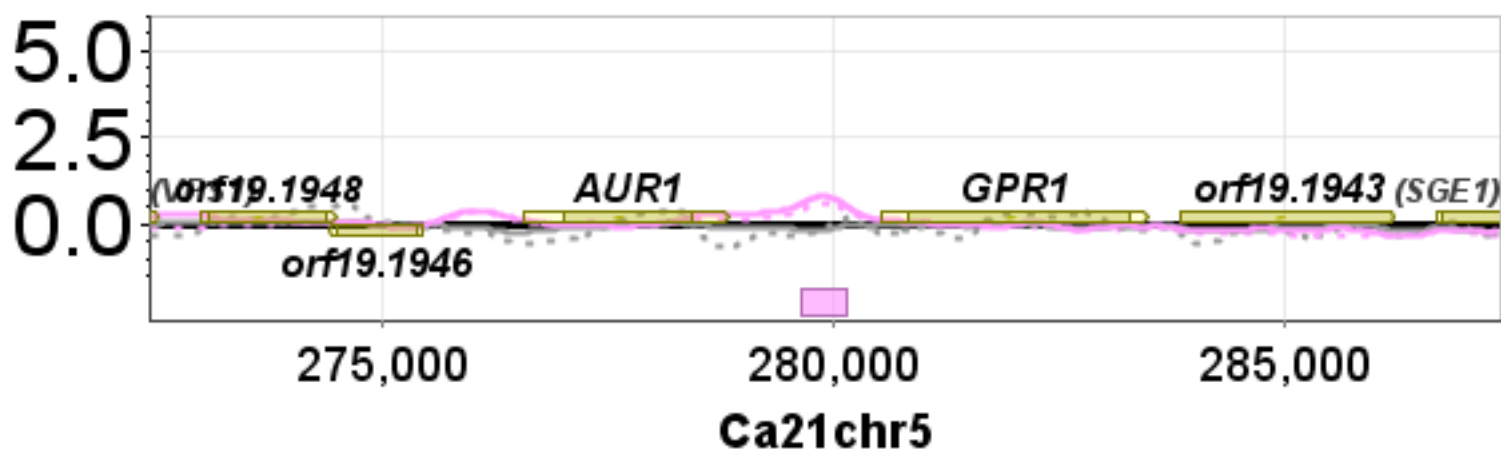

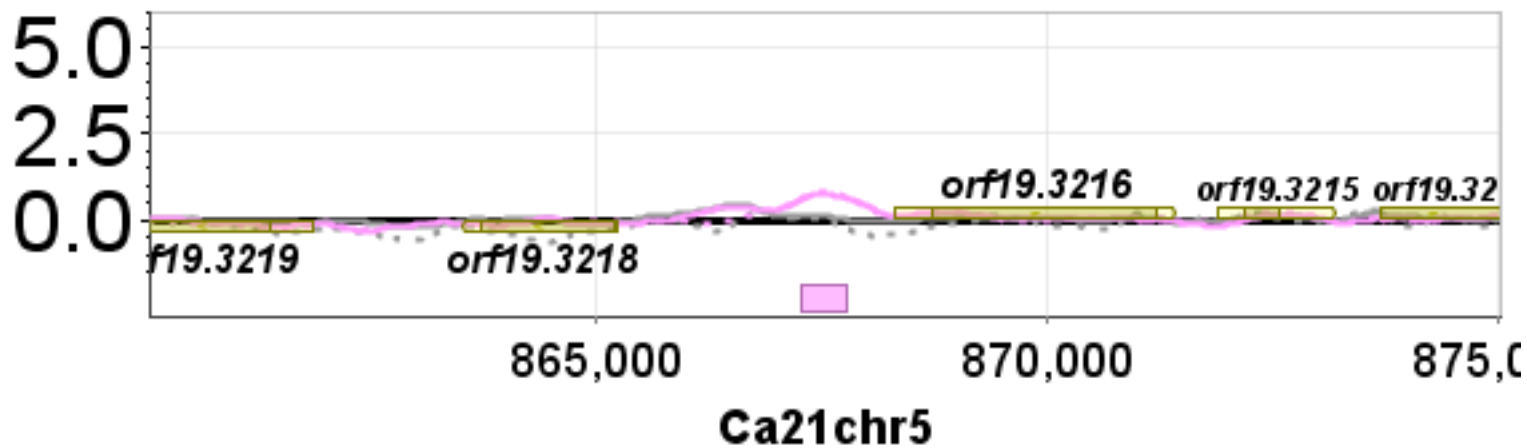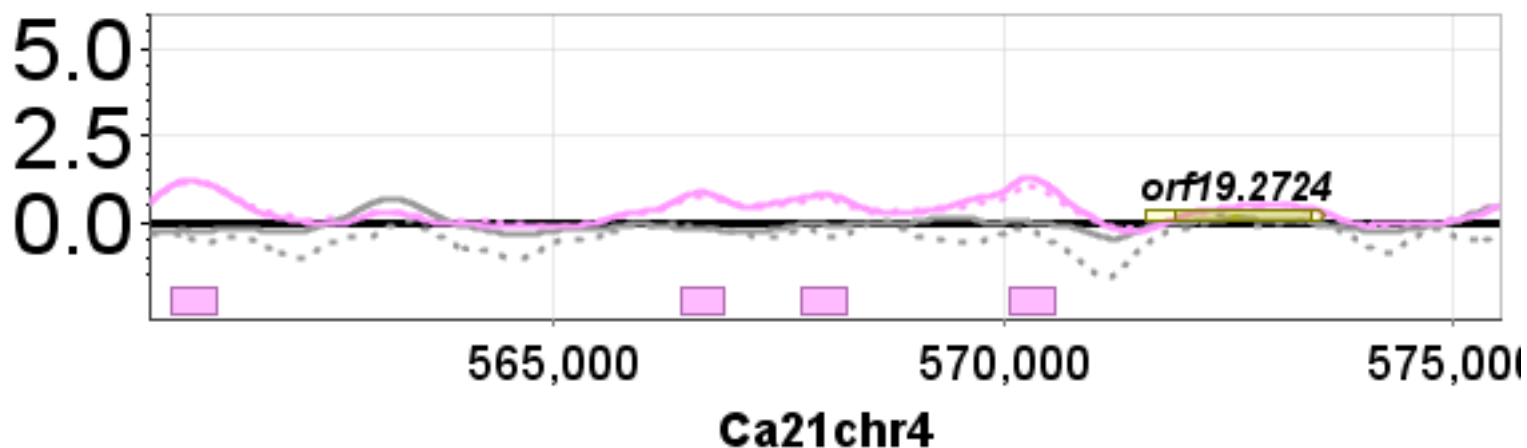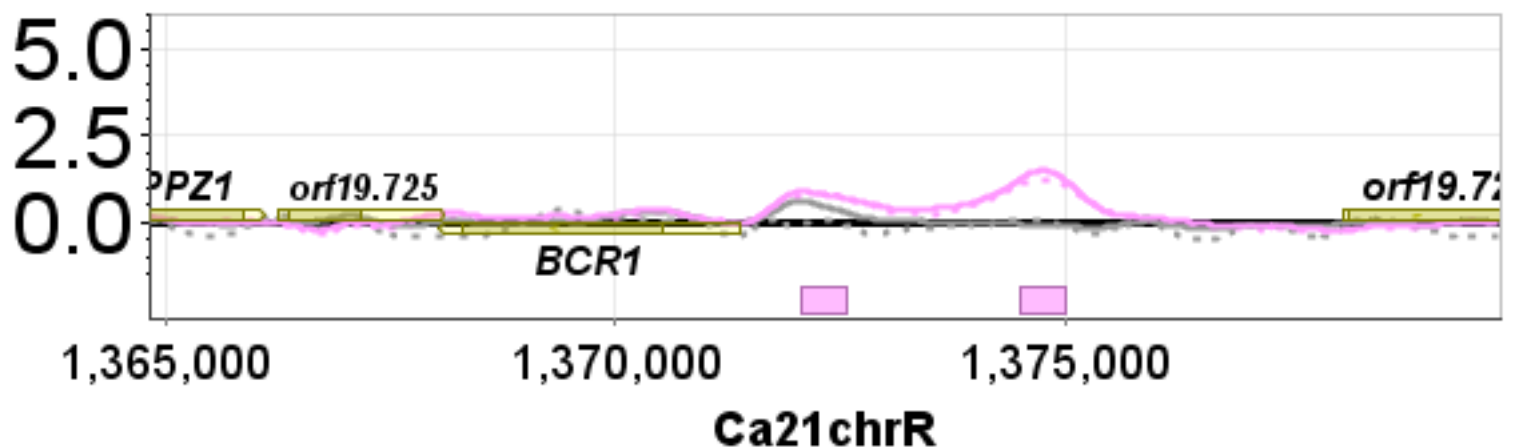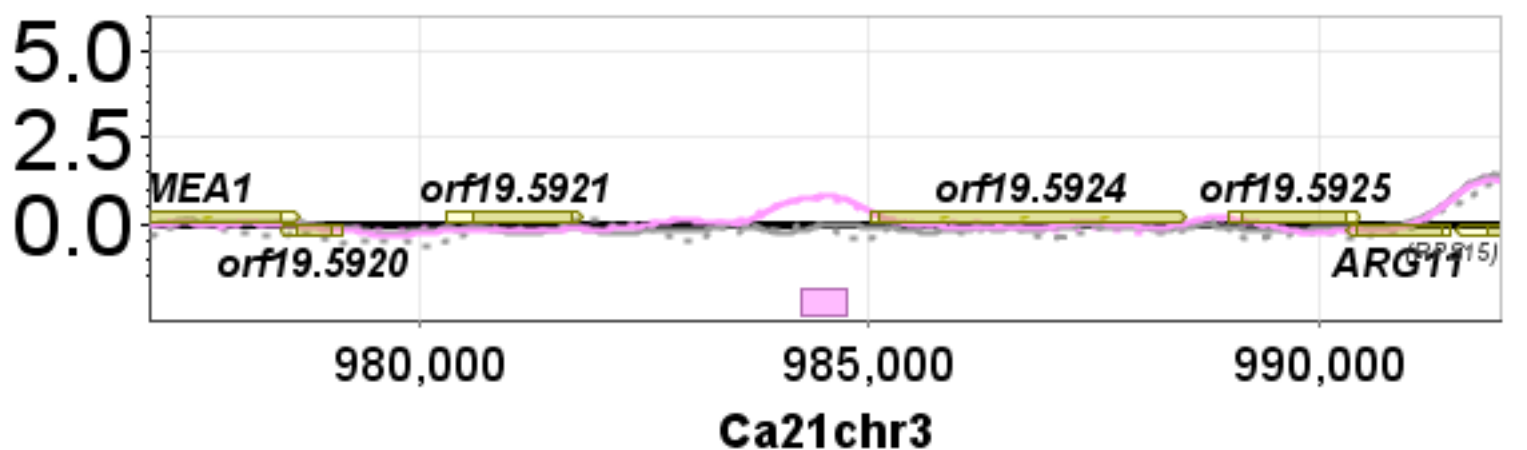

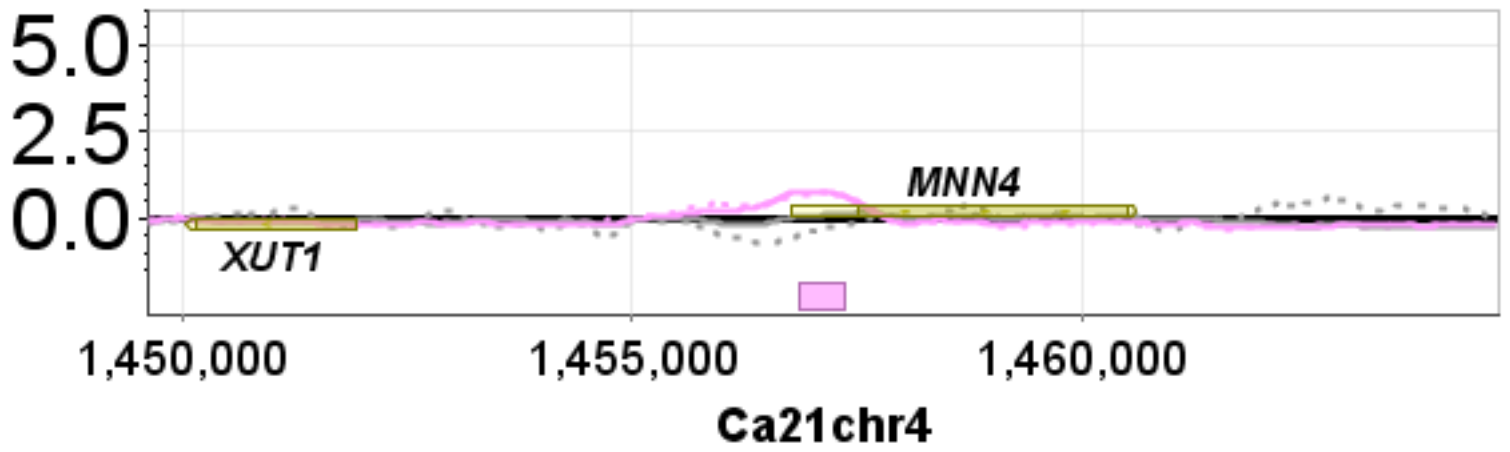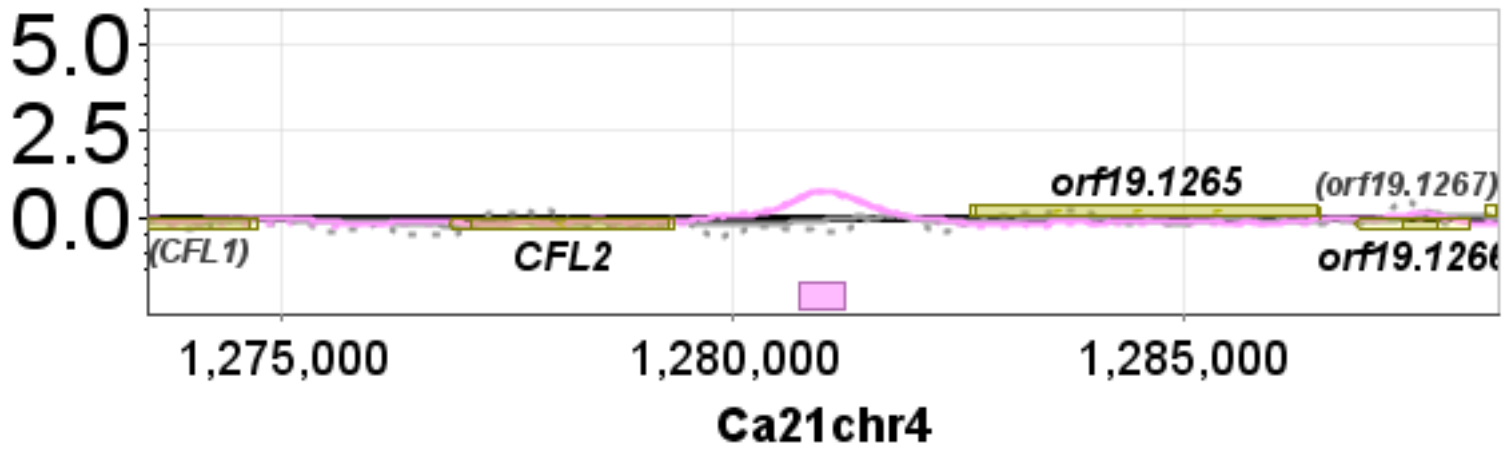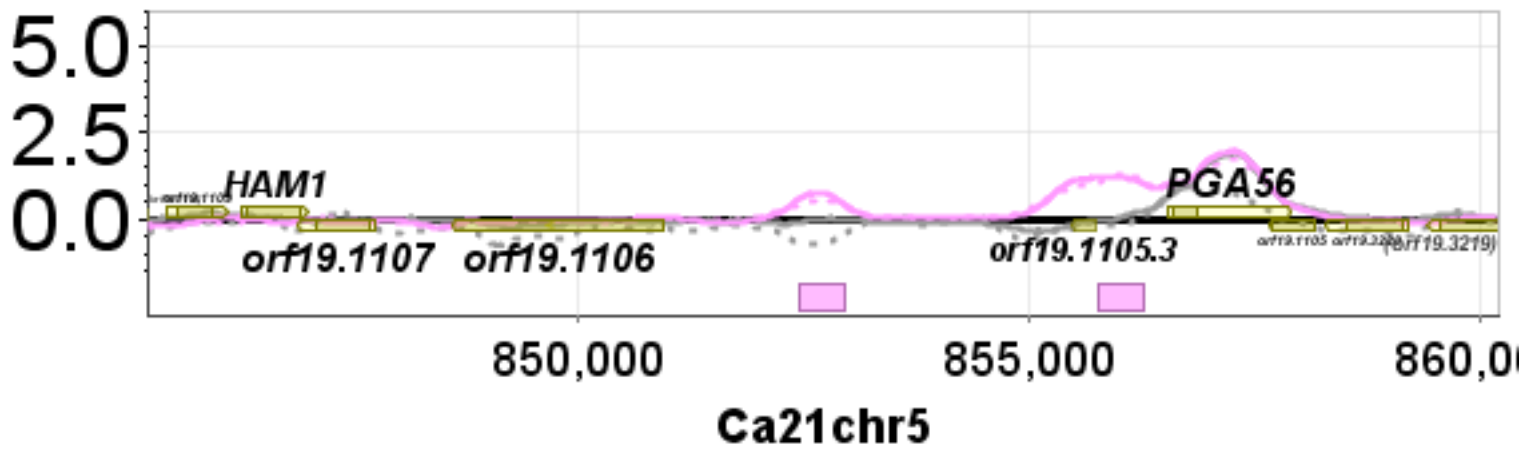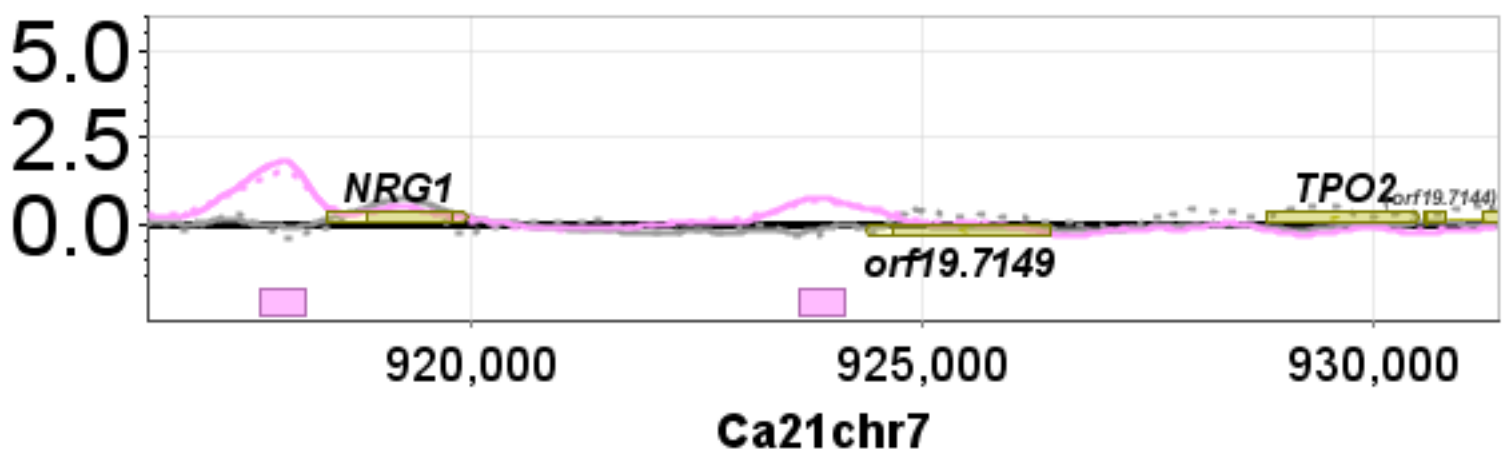

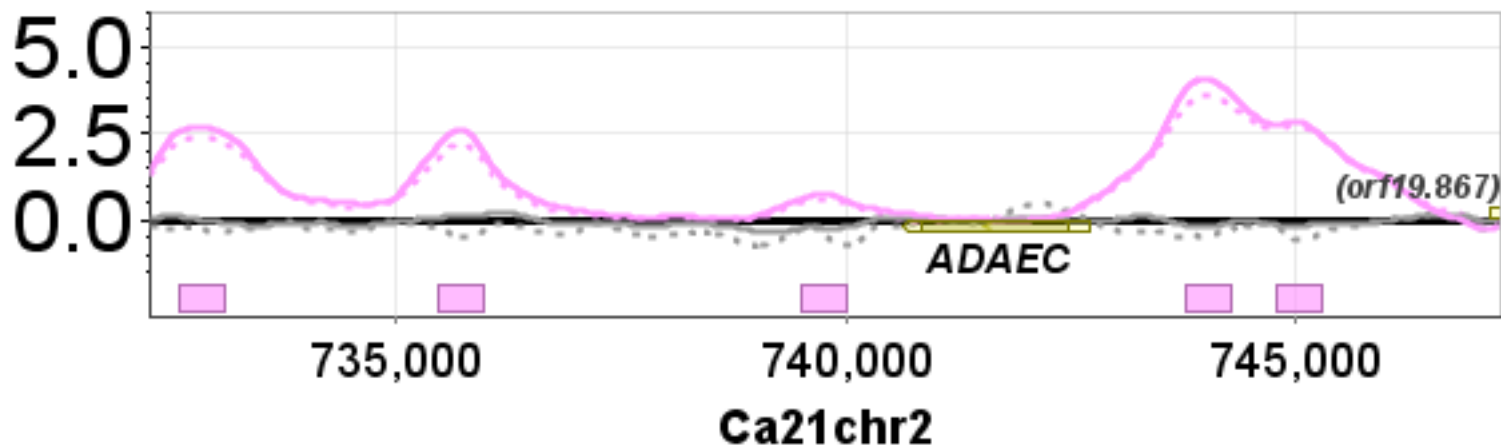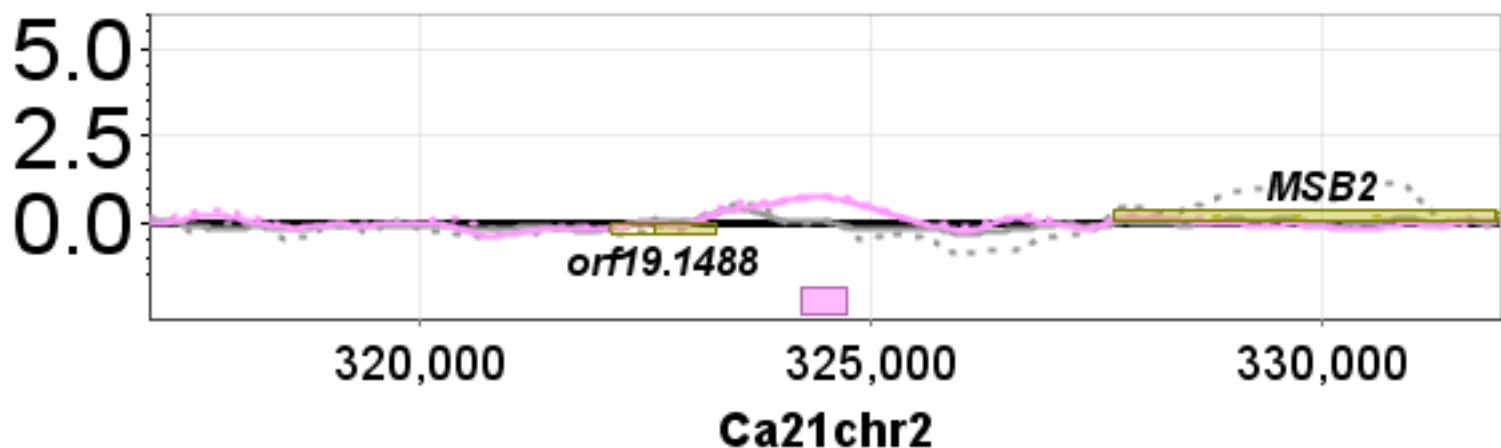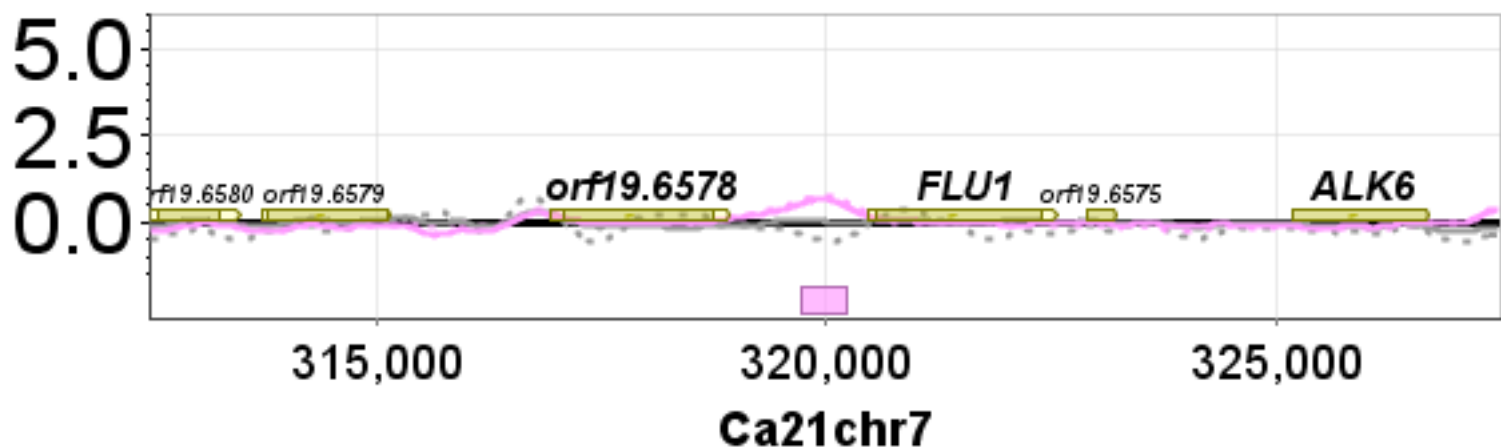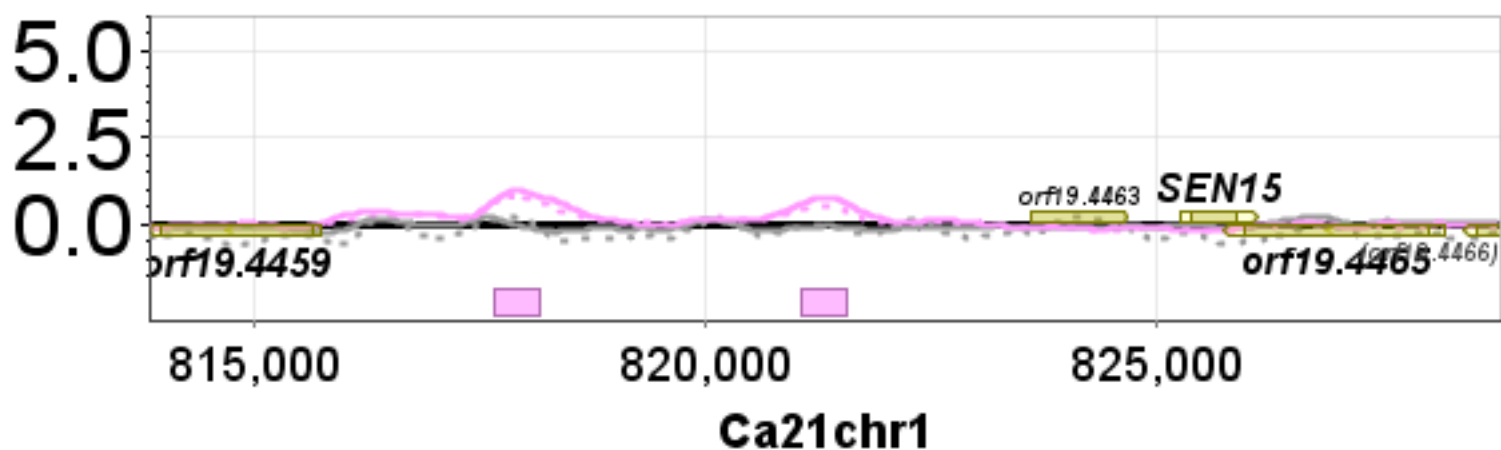

[0.746] Ca21chr1:290431-305430 [+] [orf19.3337, orf19.3336, orf19.3338, orf19.3335, ntar\_28]

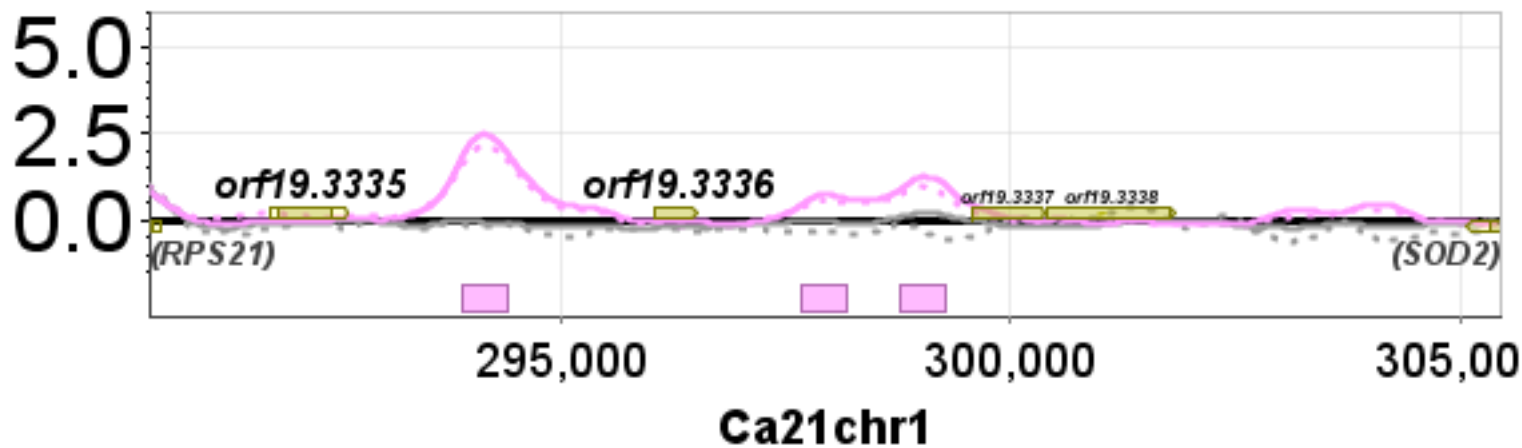

[0.744] Ca21chr2:1126051-1141050 [+] [orf19.6869, orf19.6871, orf19.6868, orf19.6867, orf19.6866]

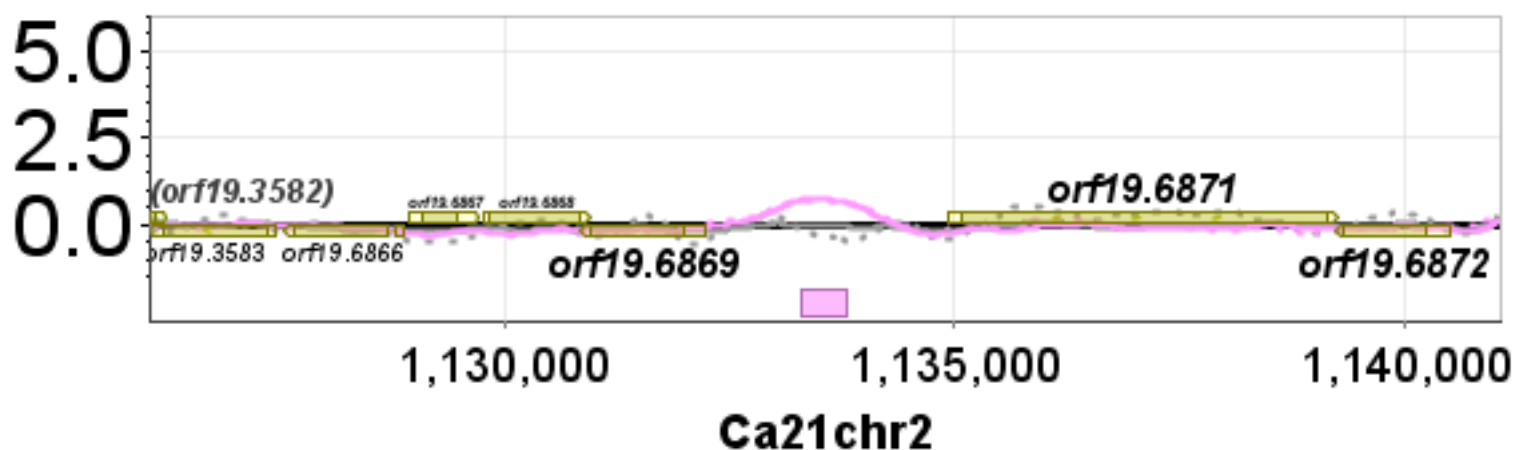

[0.743] Ca21chr5:713287-728286 [+] [ntar\_1412, orf19.4349, orf19.2657, orf19.4348]

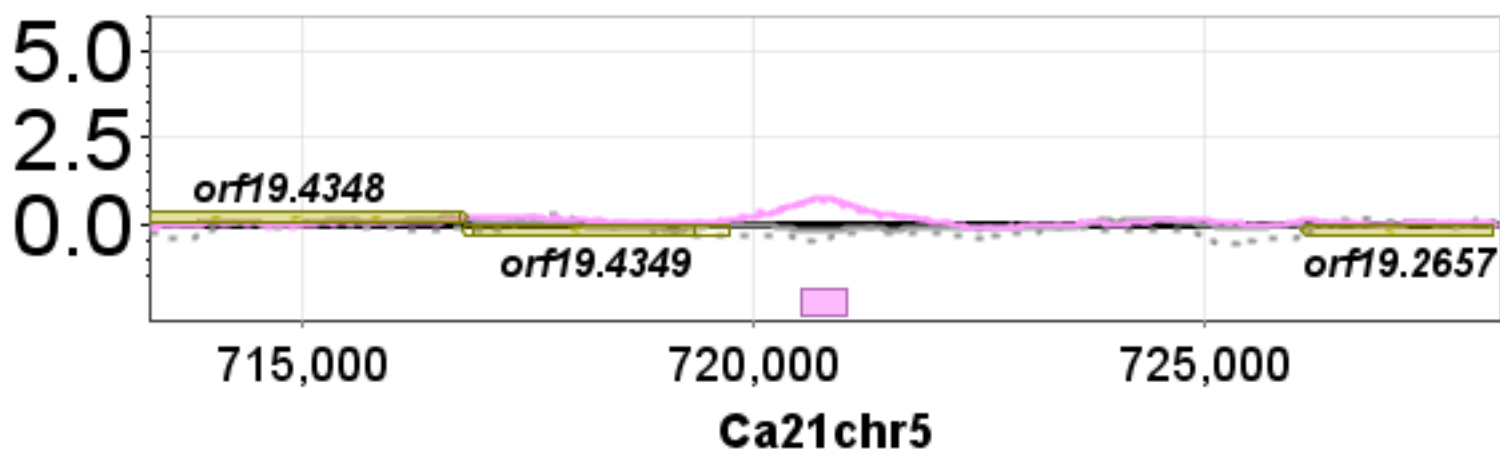

[0.743] Ca21chr7:853844-868843 [+] [RPP1B, OGG1, orf19.7192, MAM33, orf19.7193]

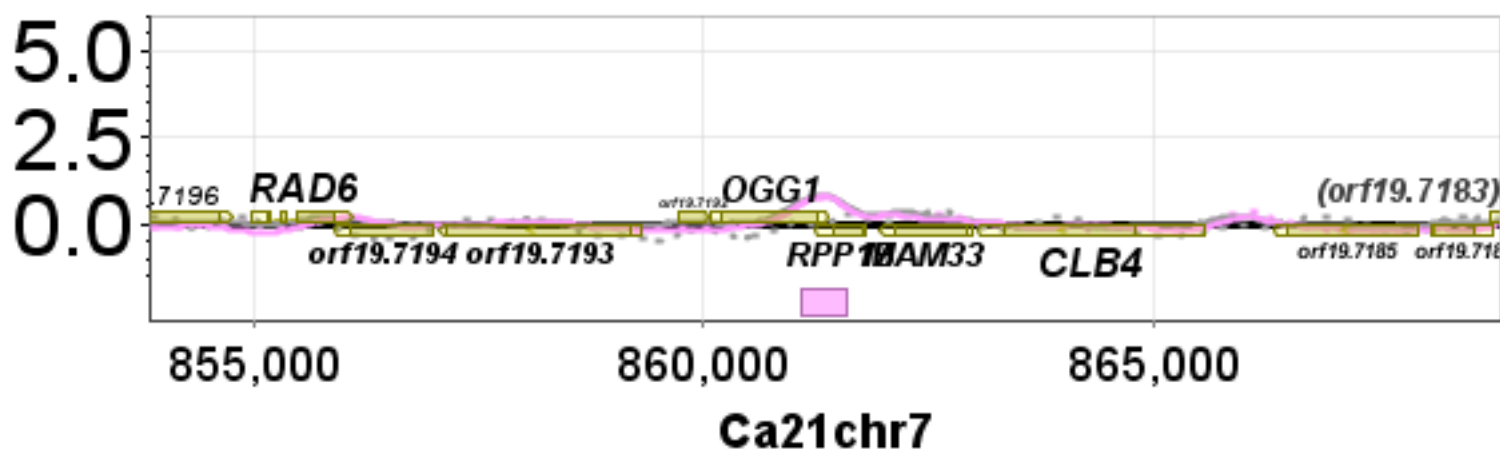

[0.742] Ca21chr2:424267-439266 [+] [orf19.1536, orf19.1535, ntar\_327, TLG2, orf19.1534]

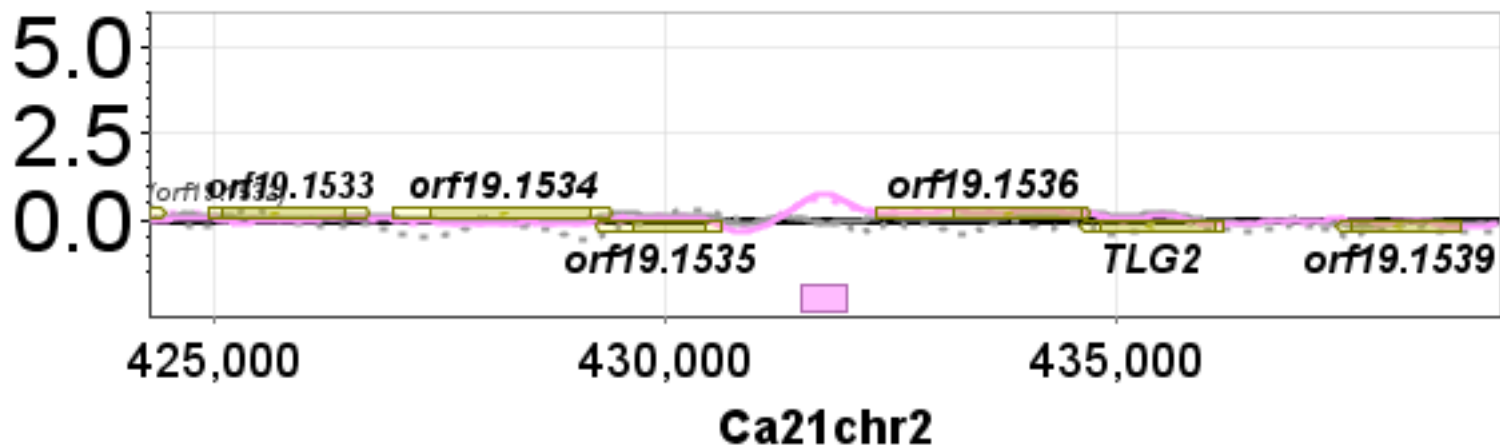

[0.742] Ca21chr2:720057-735056 [+] [orf19.871, orf19.872, orf19.873, COX6, orf19.874]

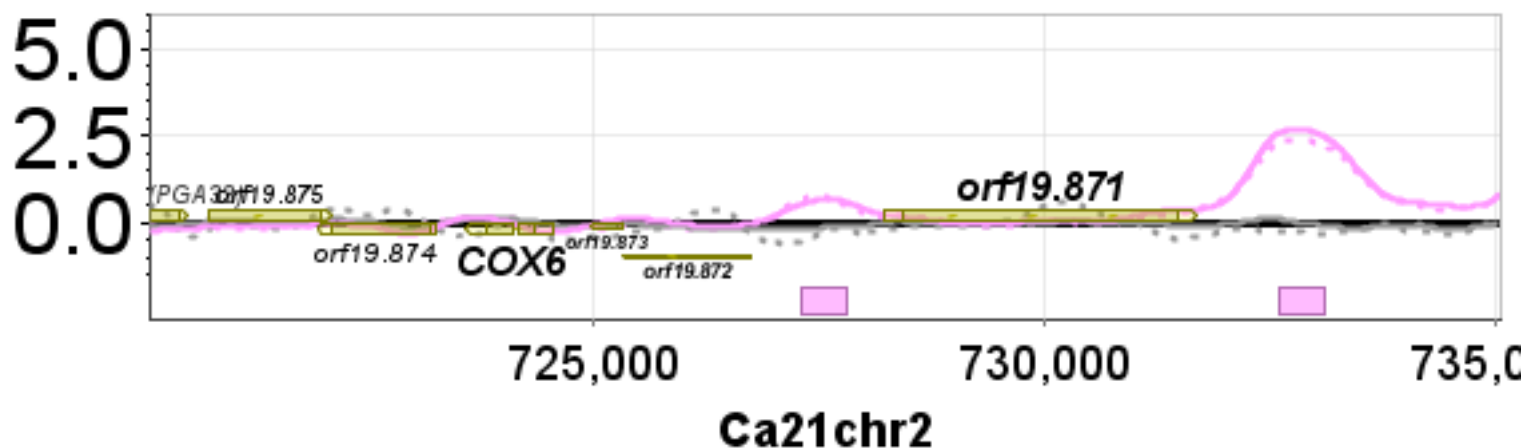

[0.74] Ca21chr2:1414718-1429717 [+] [orf19.2247, ARE2, orf19.2246, ntar\_427, YPT72]

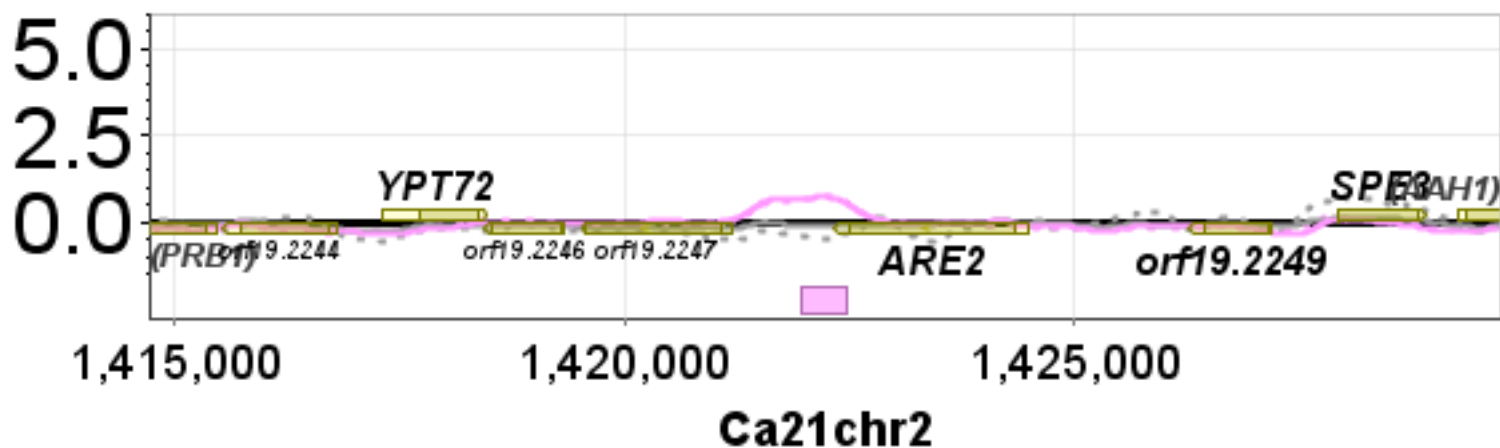

[0.732] Ca21chr1:1149736-1164735 [+] [ntar\_114, RPS27A, orf19.413, ntar\_115, orf19.414]

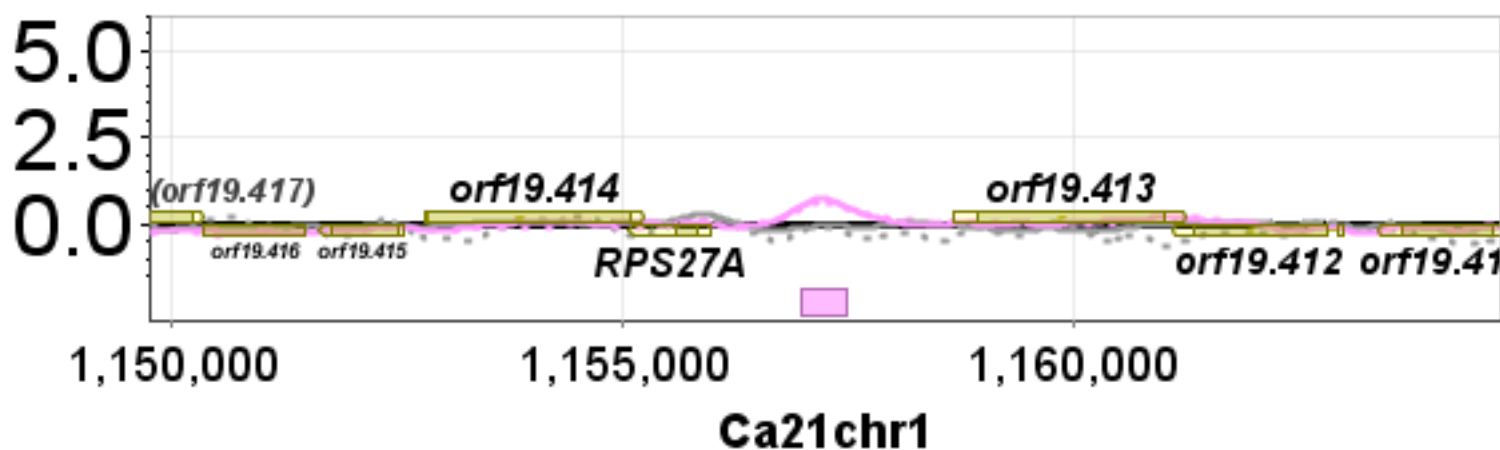

[0.731] Ca21chr3:123804-138803 [+] [ntar\_534, ntar\_533, PMA1, ntar\_532, ntar\_531]

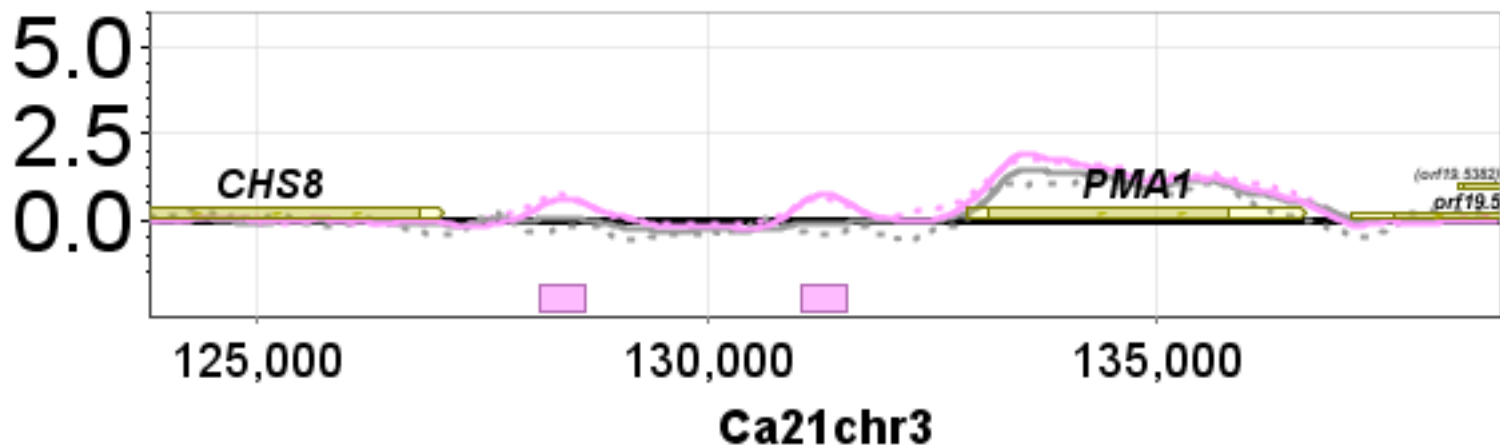

[0.731] Ca21chr3:120902-135901 [+] [ntar\_532, ntar\_531, ntar\_533, ntar\_534, PMA1]

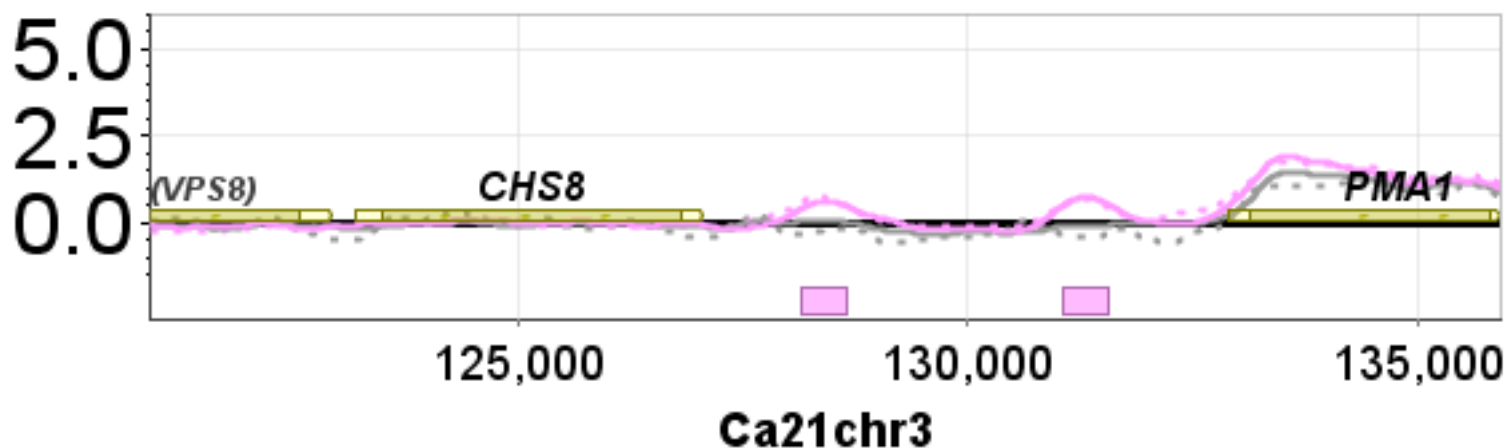

[0.729] Ca21chr1:657665-672664 [+] [ECM33, ntar\_67, orf19.3009, orf19.3010, COQ4]

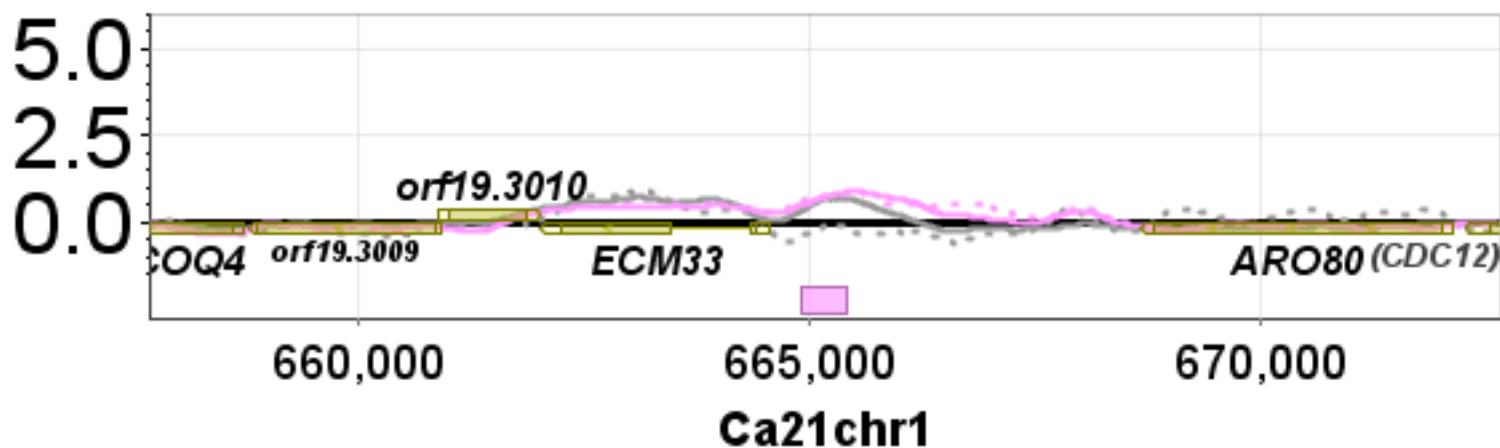

[0.729] Ca21chr7:228832-243831 [+] [orf19.6897, orf19.6896]

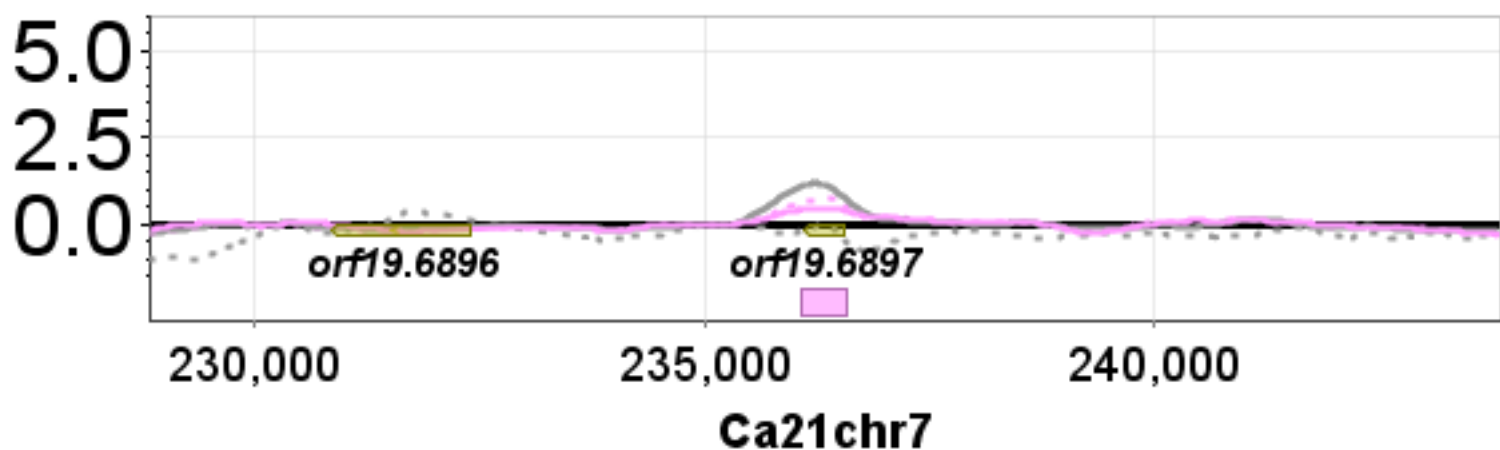

[0.726] Ca21chr6:539458-554457 [+] [orf19.5537, orf19.5536, orf19.5539, orf19.5535, ntar\_1008]

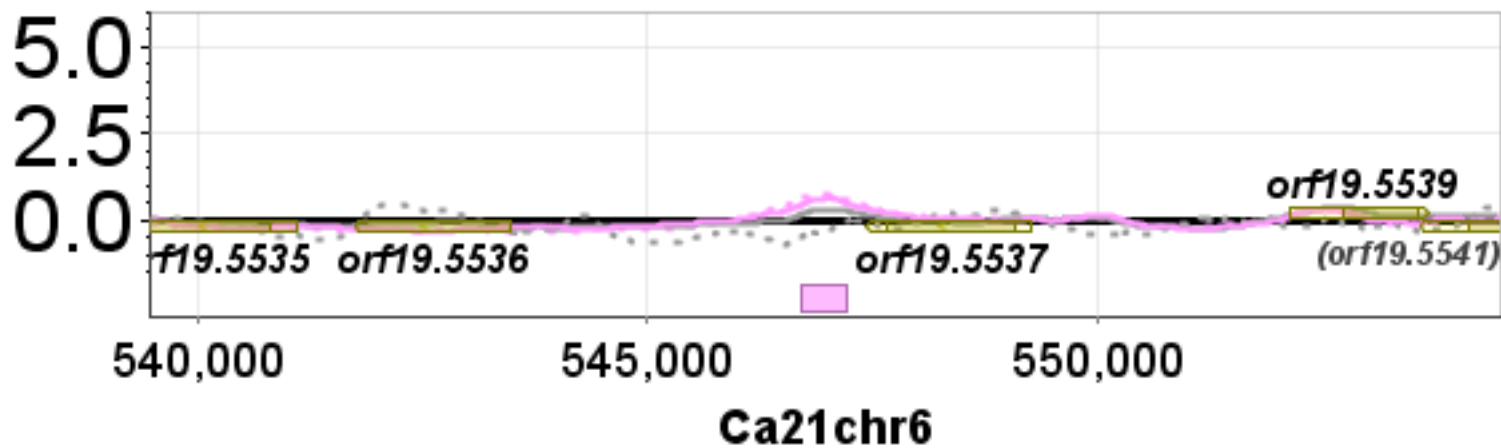

[0.723] Ca21chr4:121336-136335 [+] [ntar\_714, orf19.4167, ntar\_715, orf19.4168, orf19.4166]

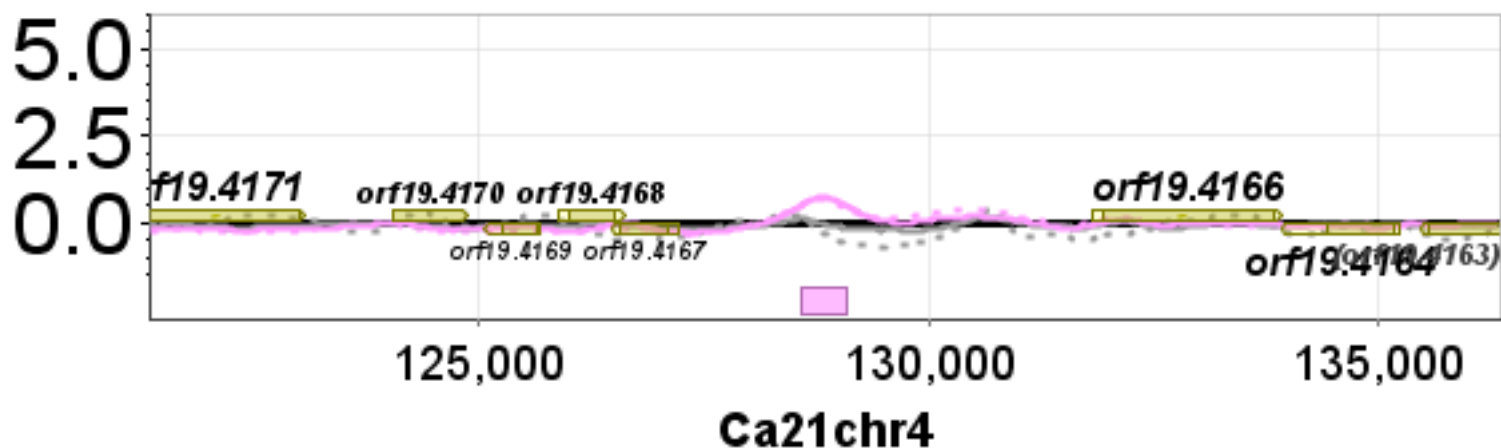

[0.717] Ca21chr7:760717-775716 [+] [orf19.6705, orf19.6704, orf19.1330, GYP7]

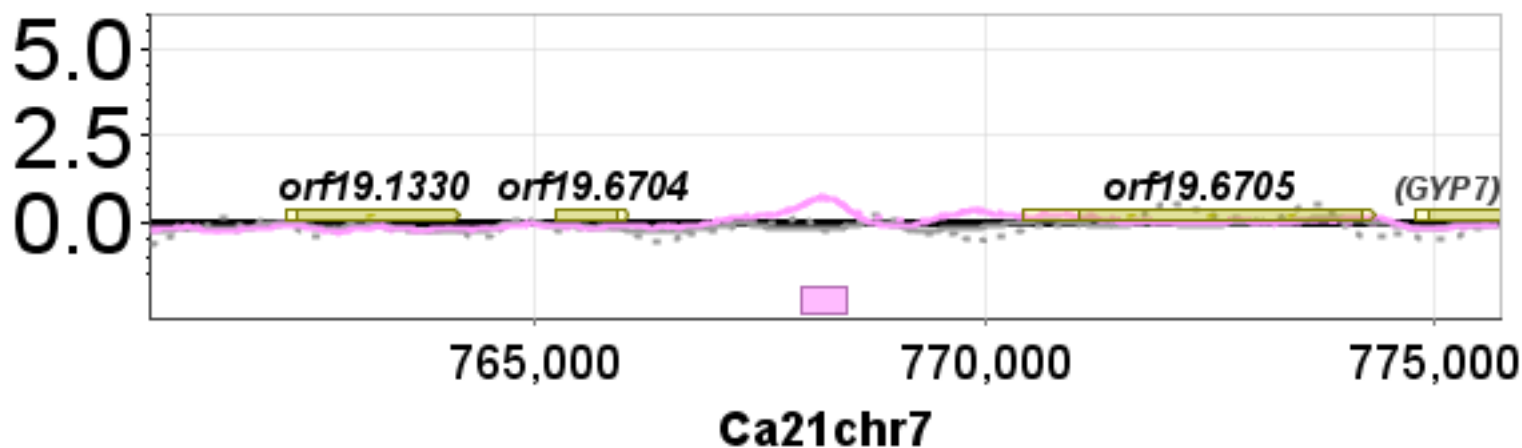

[0.714] Ca21chr5:1049940-1064939 [+] [orf19.3970, orf19.3971, ntar\_953, orf19.3972, orf19.3969]

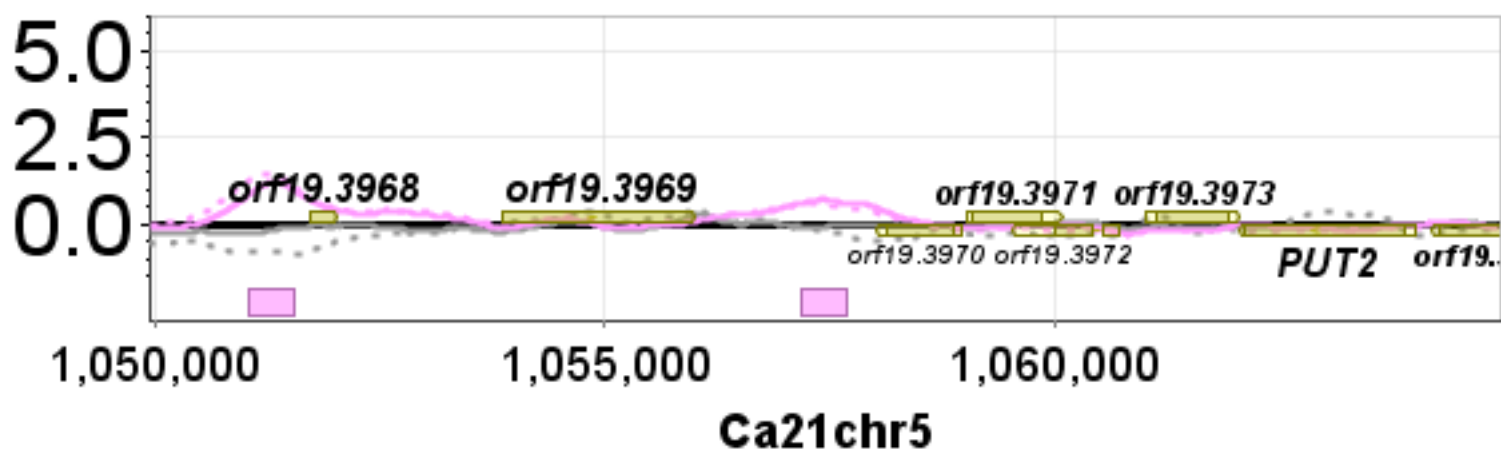



[0.711] Ca21chrR:1707501-1722500 [+] [tg(gcc)1, orf19.612, ntar\_1351, ntar\_1353, ntar\_1352]

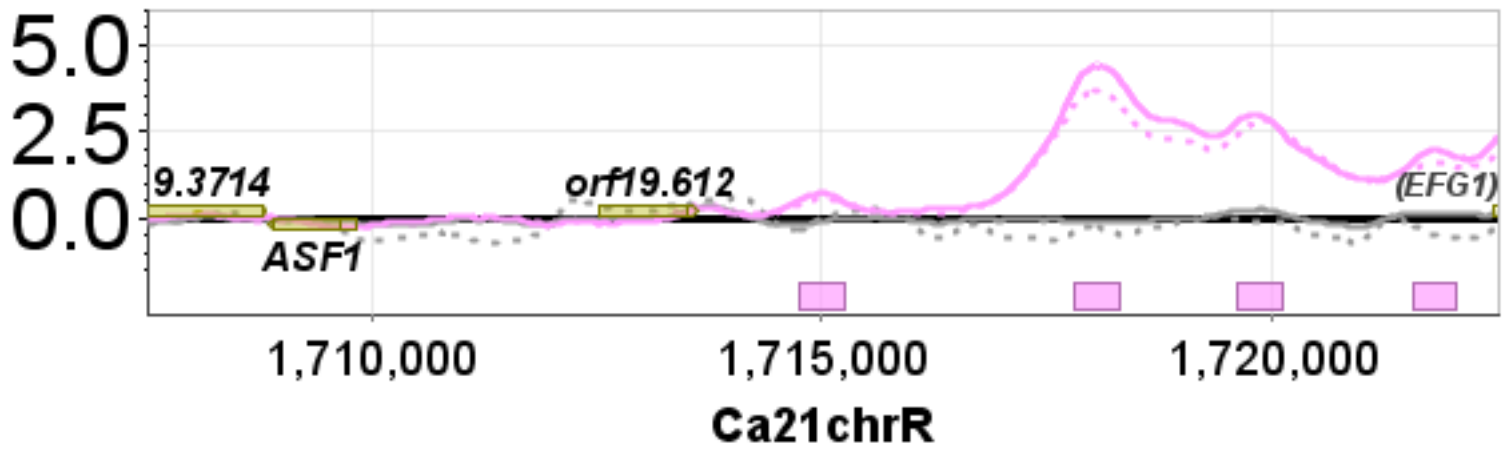

[0.708] Ca21chr3:1599209-1614208 [+] [SSN6, POS5, RPD31, orf19.6802, orf19.6797]

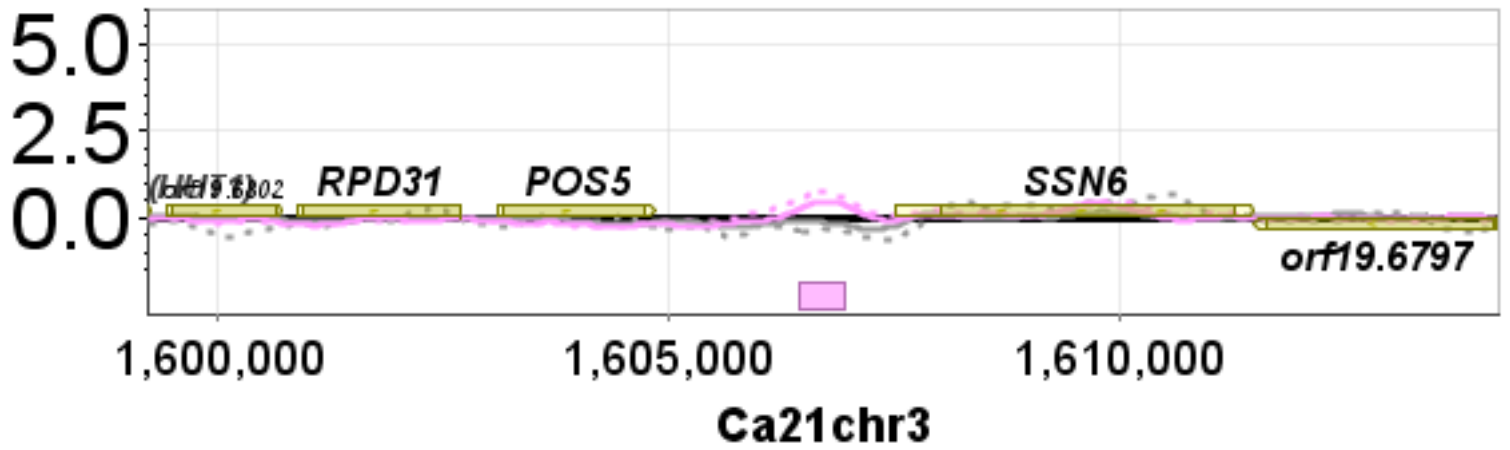

[0.702] Ca21chr1:2575274-2590273 [+] [orf19.1137, orf19.1139, orf19.1136, CAS1, orf19.1140]

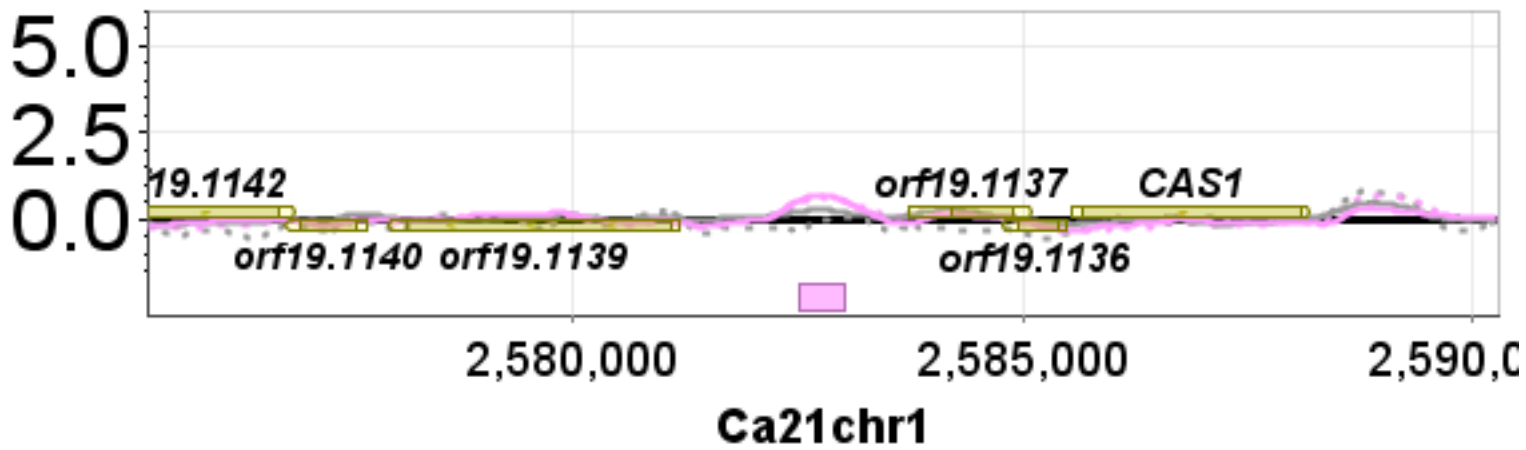

[0.701] Ca21chr5:620621-635620 [+] [GAP1, orf19.4305, orf19.4305.1, orf19.4306, orf19.4307]

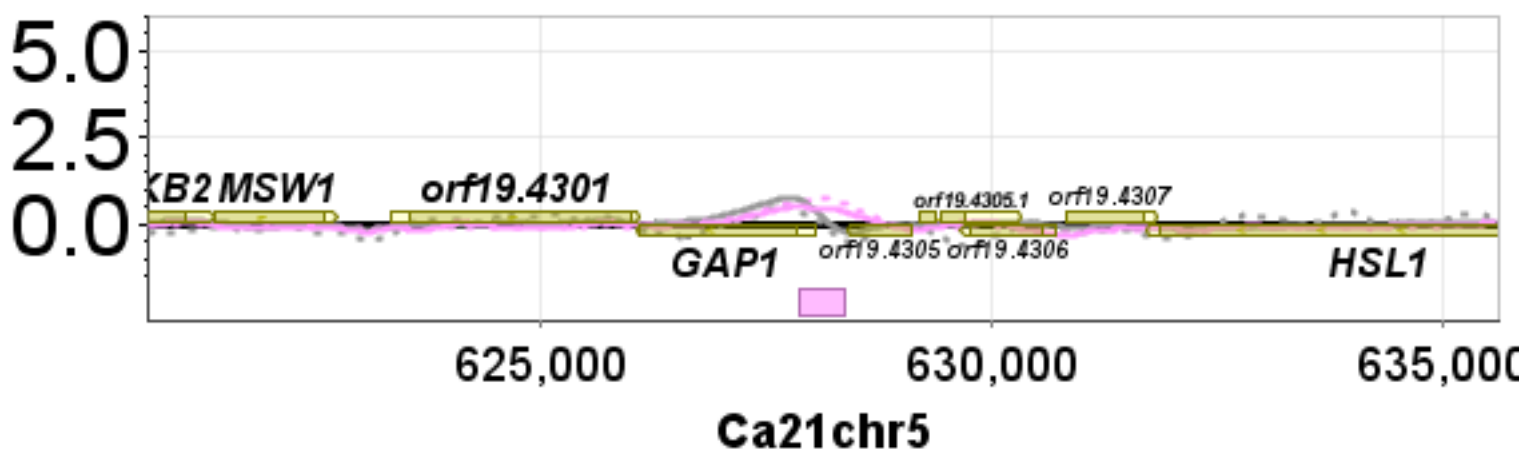

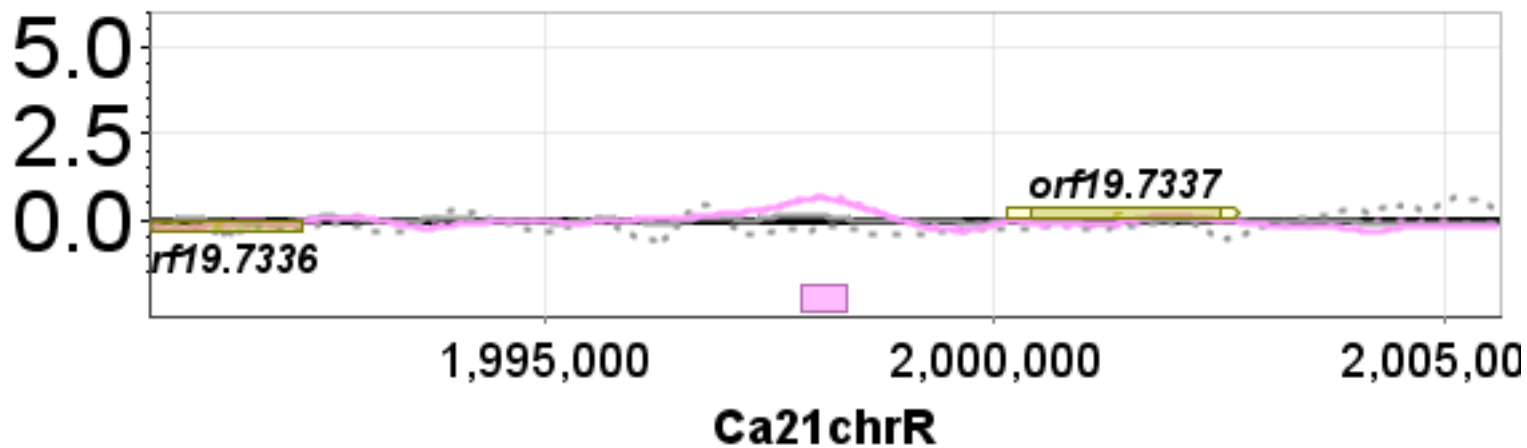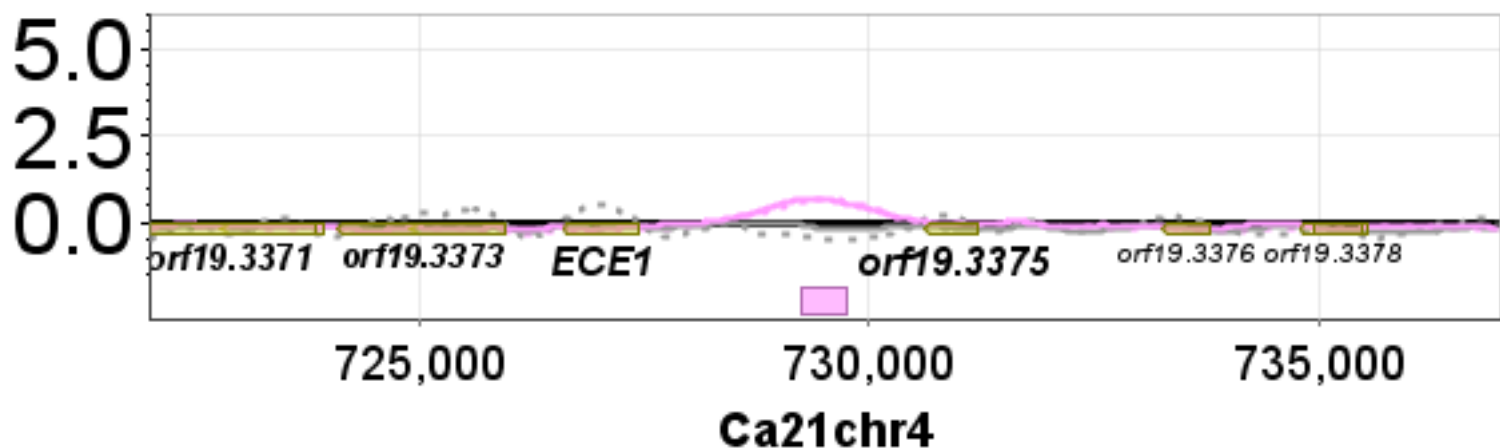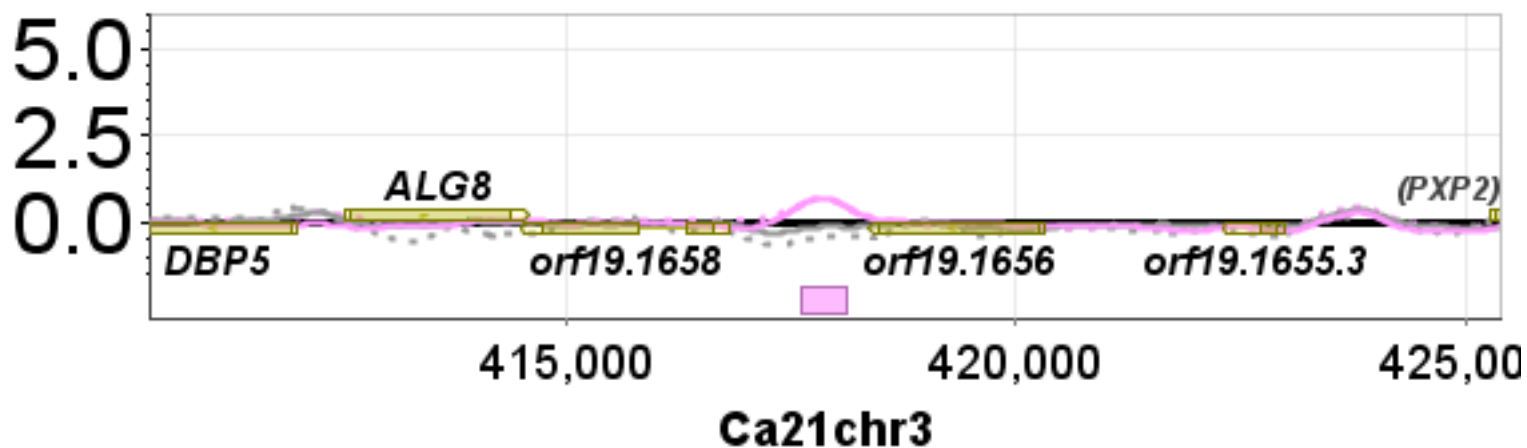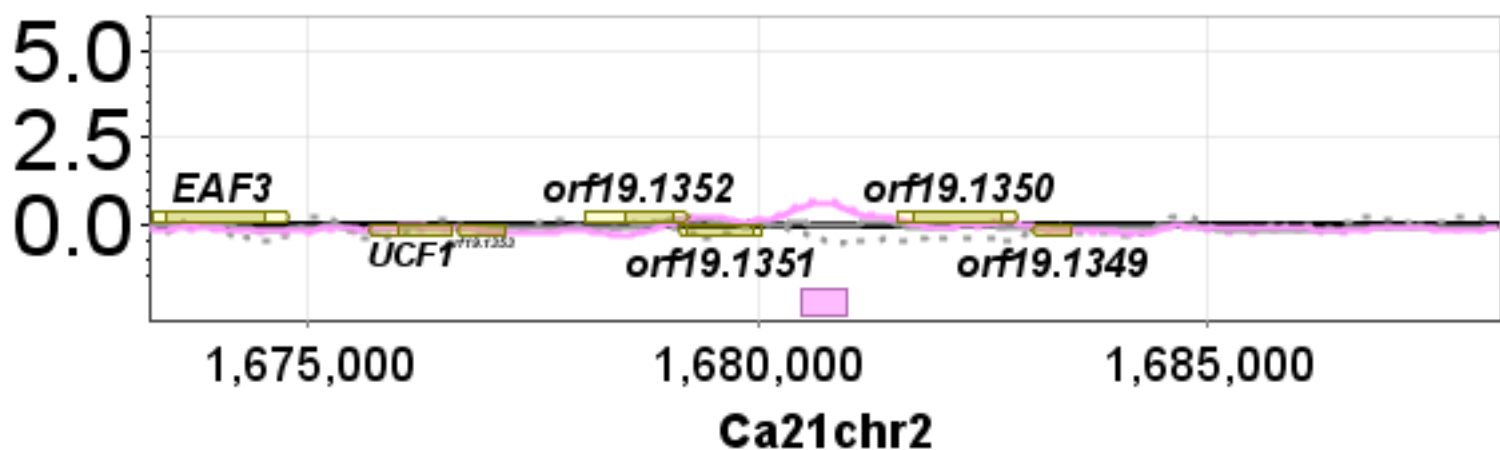

[0.681] Ca21chr3:965404-980403 [+] [orf19.5917.3, STP3, orf19.5918, MEA1, orf19.5915]

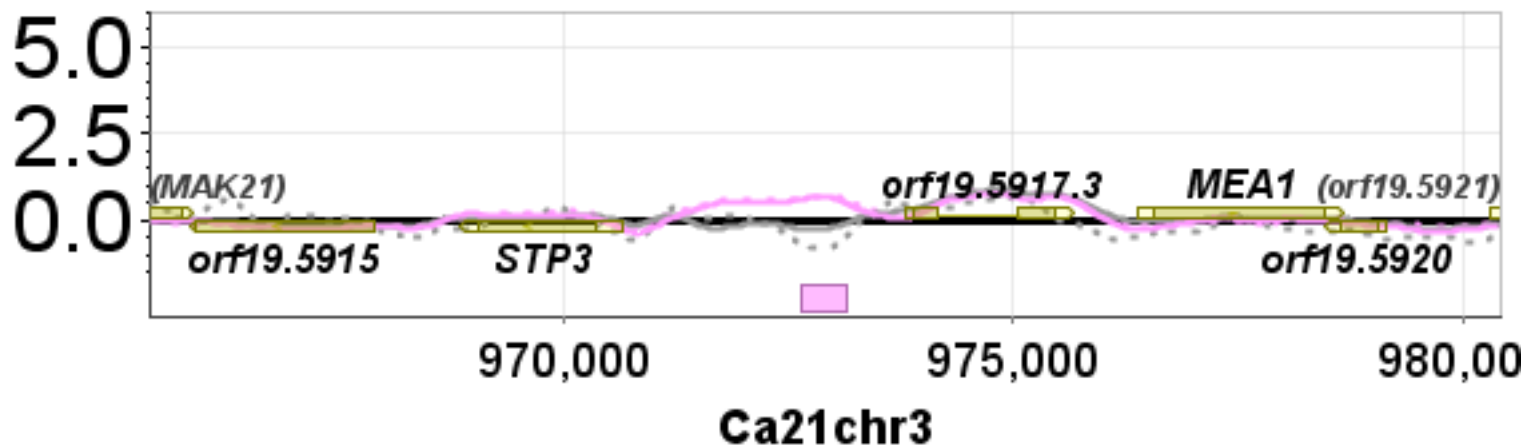

[0.677] Ca21chr4:1417944-1432943 [+] [orf19.2892, orf19.2893, VMA8, orf19.2891, SOU1]

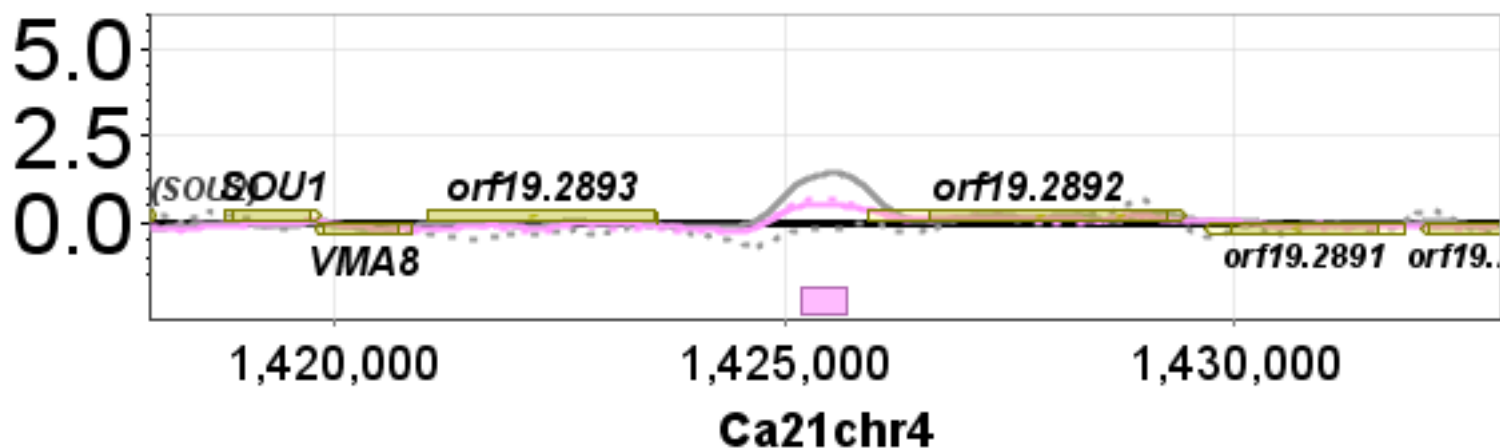

[0.674] Ca21chrR:70557-85556 [+] [orf19.7502, CDA2, orf19.7501, orf19.7504, PXA1]

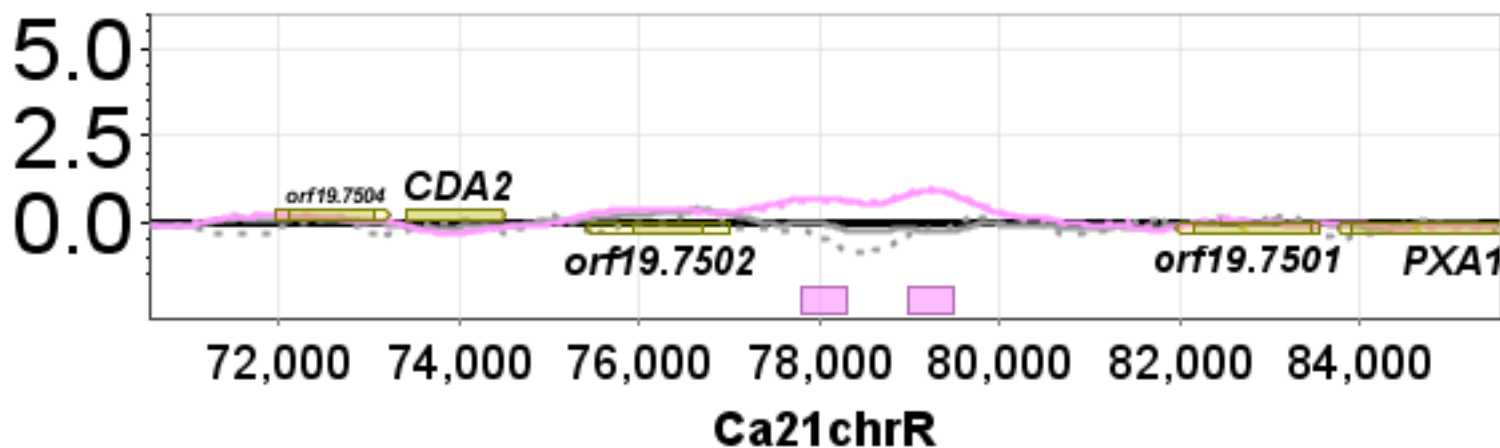

[0.673] Ca21chr2:2014989-2029988 [+] [orf19.1363, SMM1, orf19.1364, orf19.1361, orf19.1360.1]

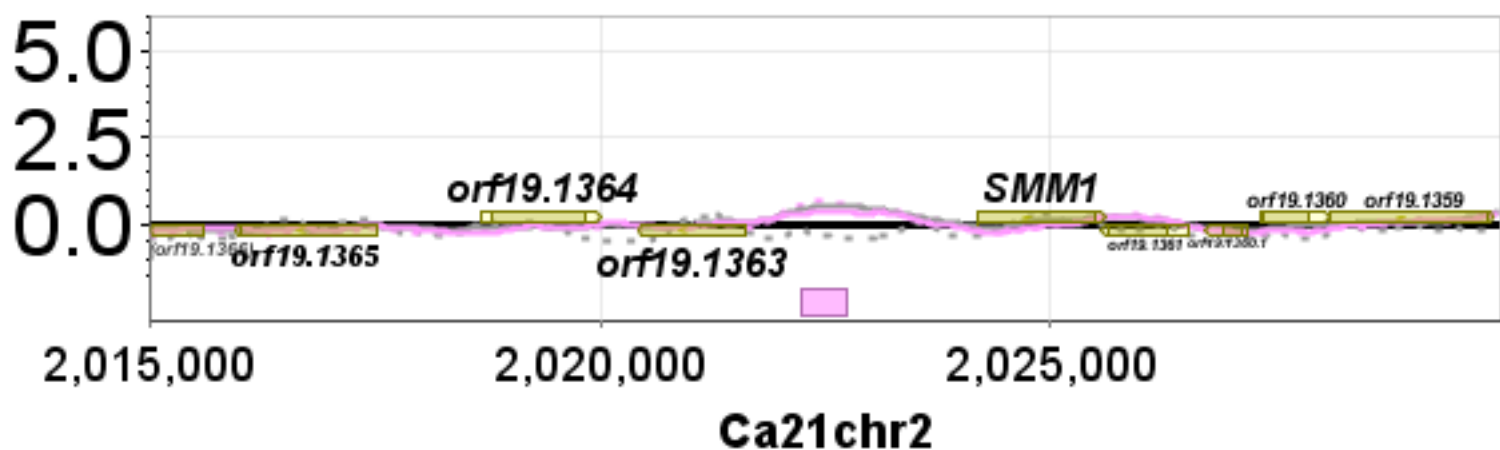

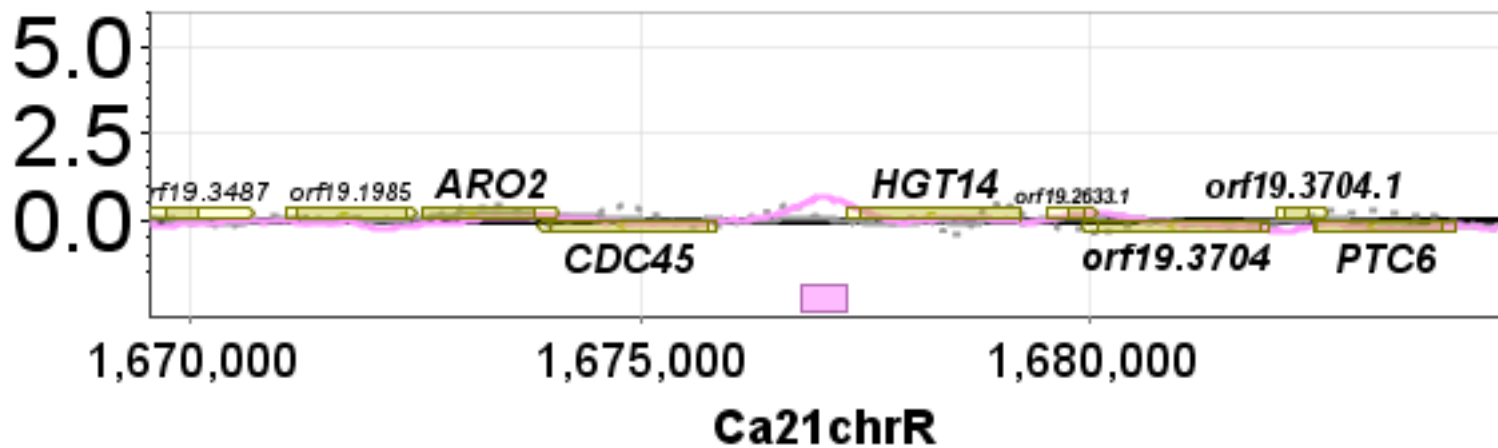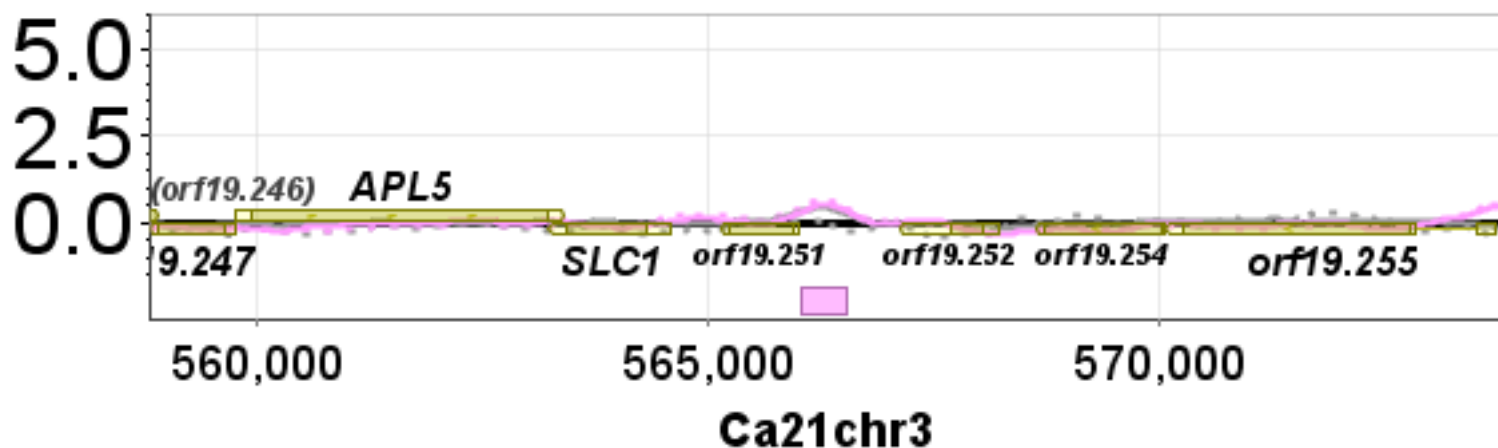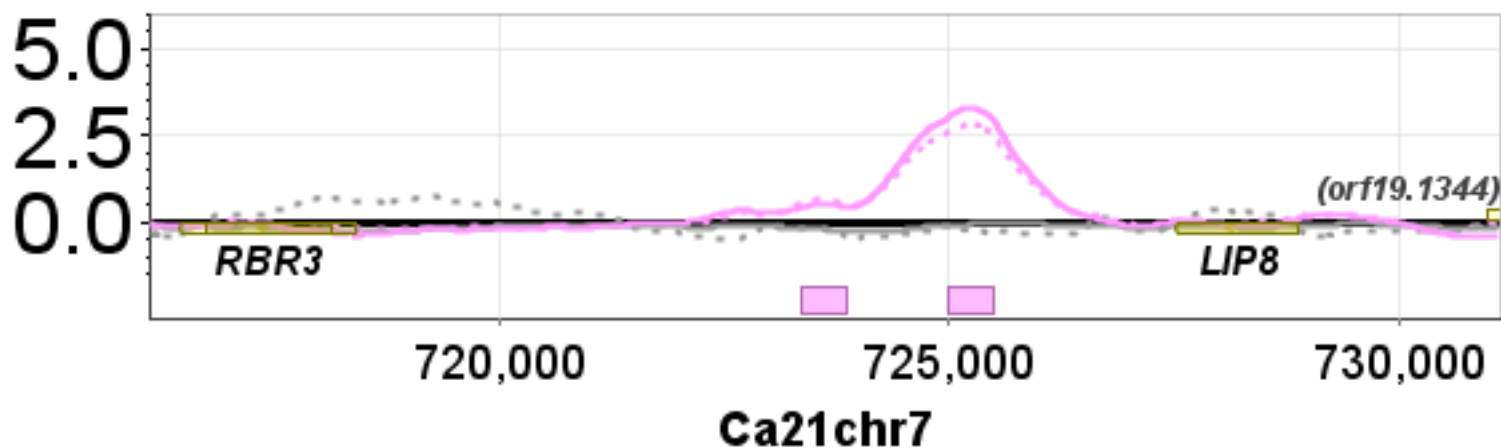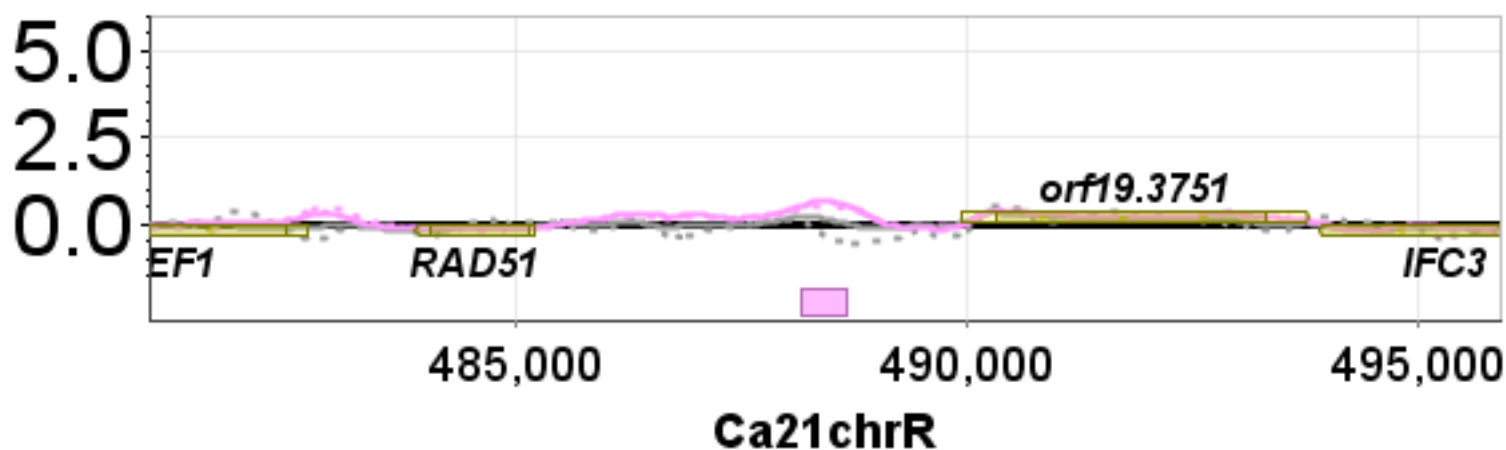

[0.651] Ca21chr6:156456-171455 [+] [GPX2, CAN3, orf19.86, ntar\_974, GPX1]

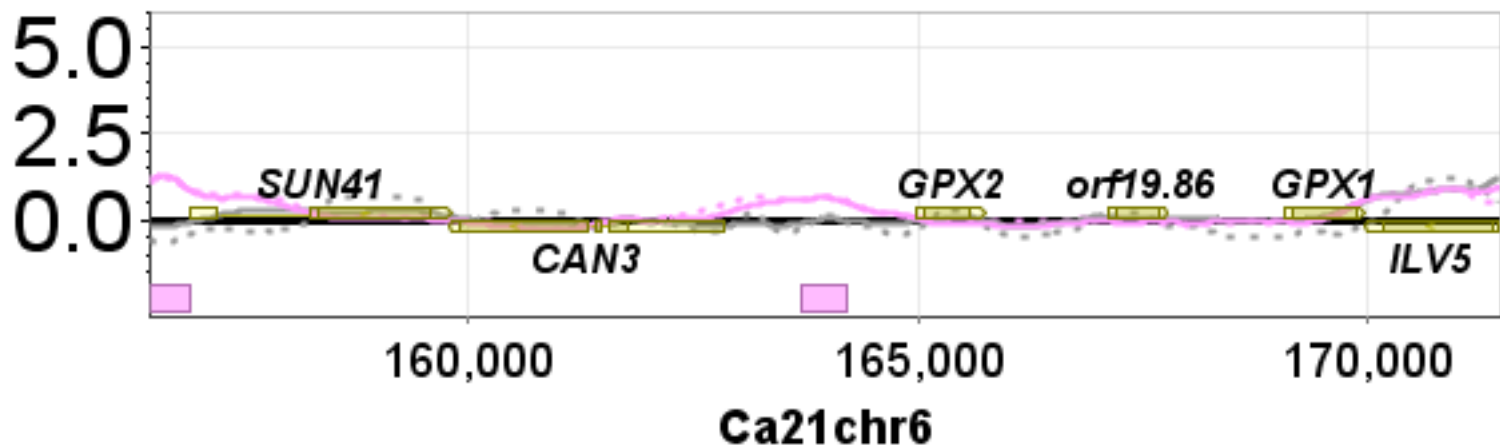

[0.65] Ca21chr1:1019427-1034426 [+] [ntar\_99, orf19.750, orf19.751, ntar\_98, orf19.752]

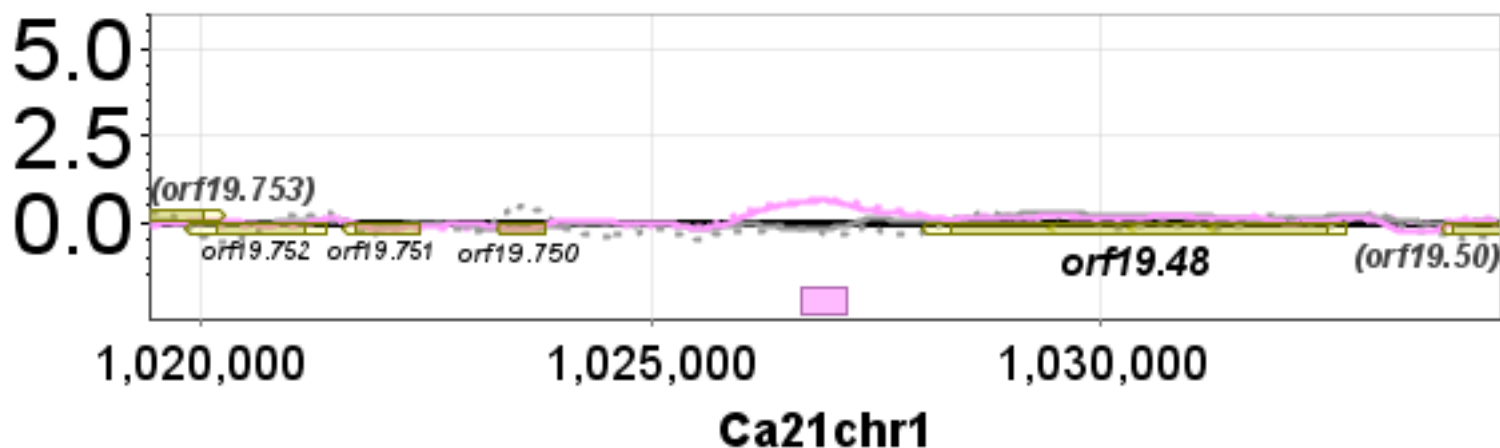

[0.649] Ca21chr7:101925-116924 [+] [ntar\_1413, orf19.7055, orf19.7056, orf19.7054, GAC1]

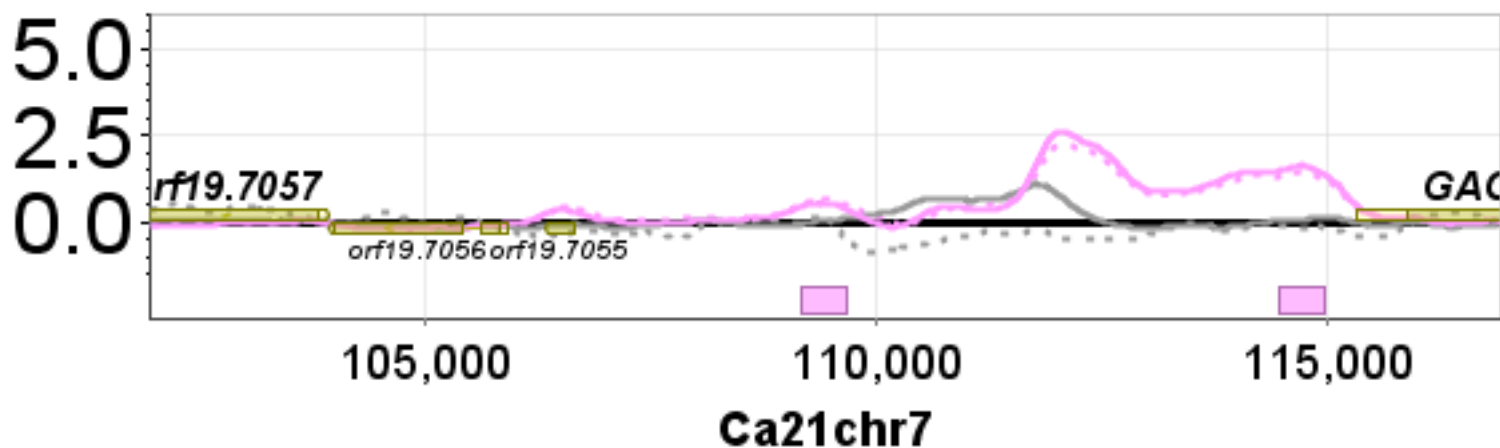

[0.632] Ca21chr5:220720-235719 [+] [ntar\_862, ntar\_863, orf19.1964, BUD23, orf19.1967]

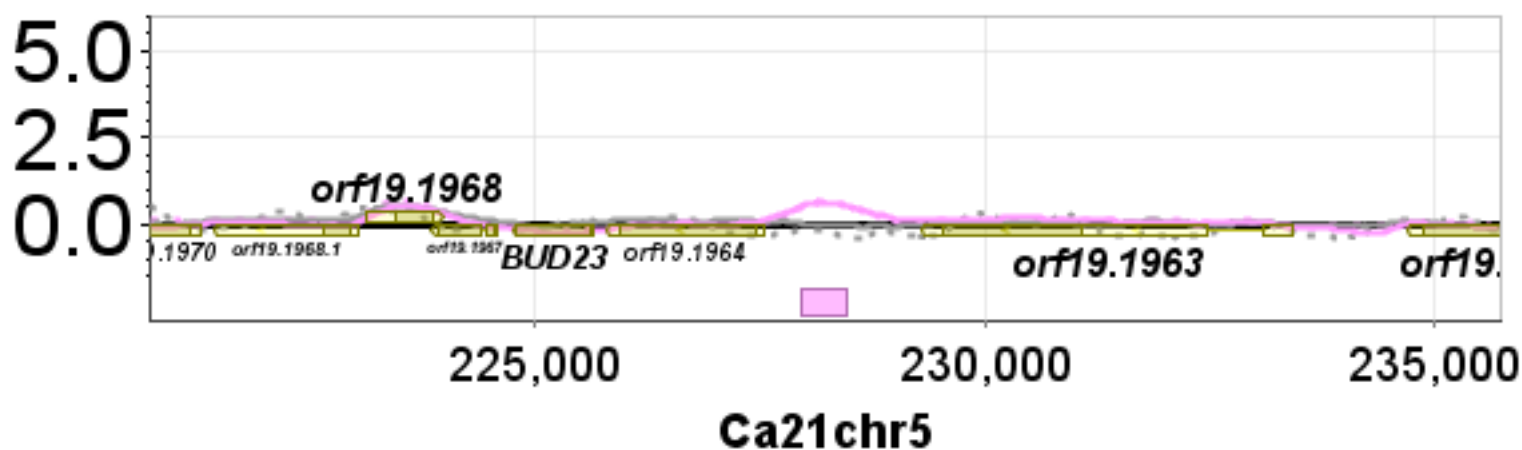

[0.631] Ca21chr2:1275061-1290060 [+] [GSP1, orf19.5495, orf19.5492, ATP14, orf19.5491]

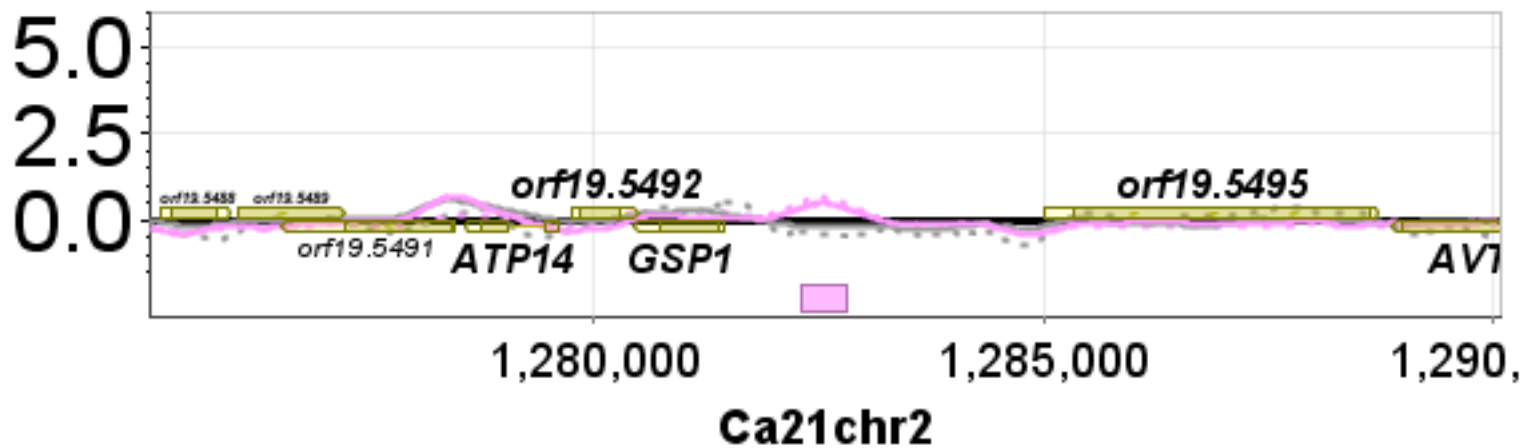

[0.631] Ca21chr4:928333-943332 [+] [orf19.1409.2, orf19.1409.1, VAC7, orf19.1409.3, ntar\_798]

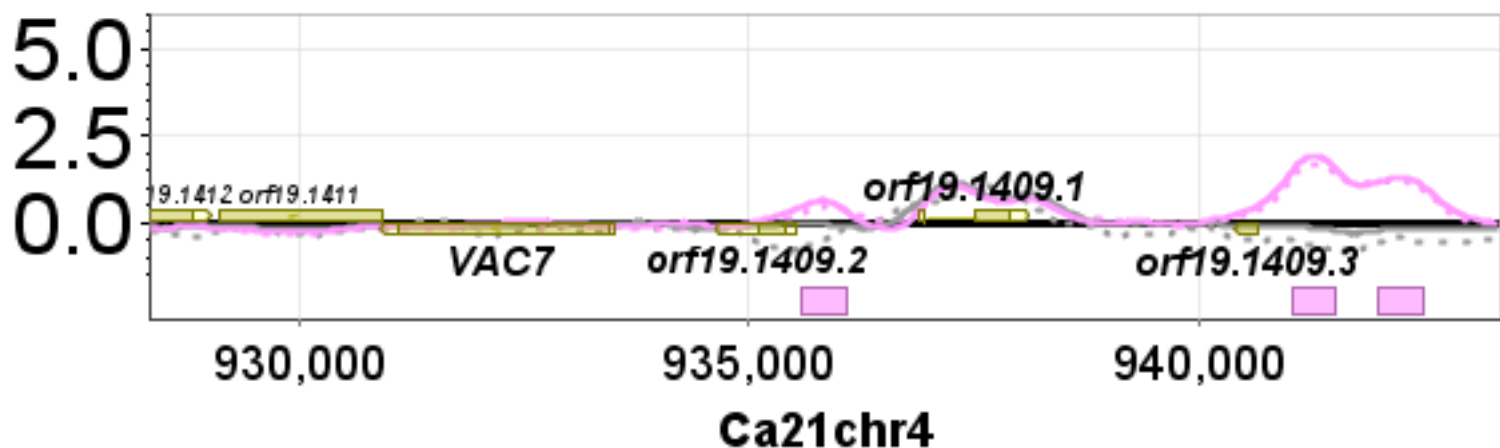

[0.631] Ca21chr6:304533-319532 [+] [ntar\_990, ntar\_989, ntar\_988, orf19.3432, orf19.3431]

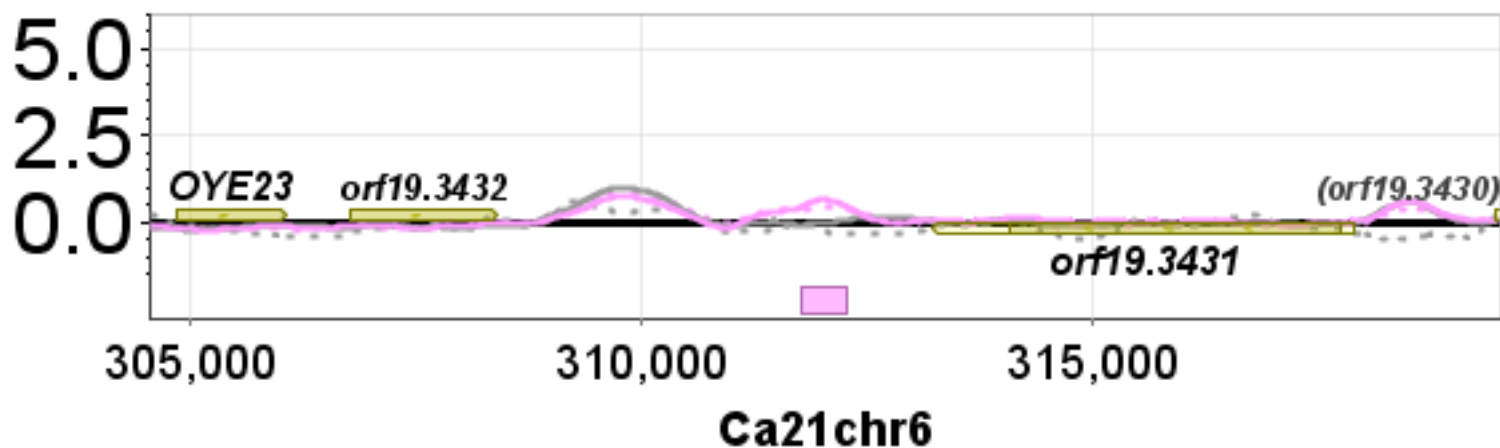

[0.63] Ca21chr2:2067777-2082776 [+] [orf19.1769, CYC1, ntar\_499, ntar\_500, ntar\_498]

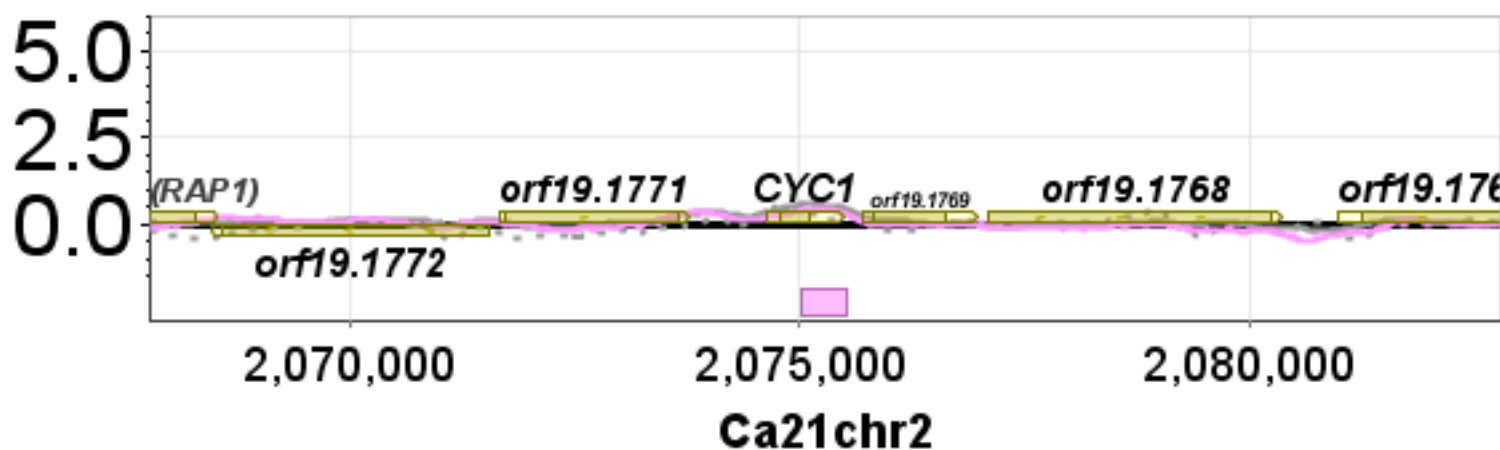

[0.624] Ca21chr4:281337-296336 [+] [ntar\_739, HAP3, UEC1, ntar\_740, BEM1]

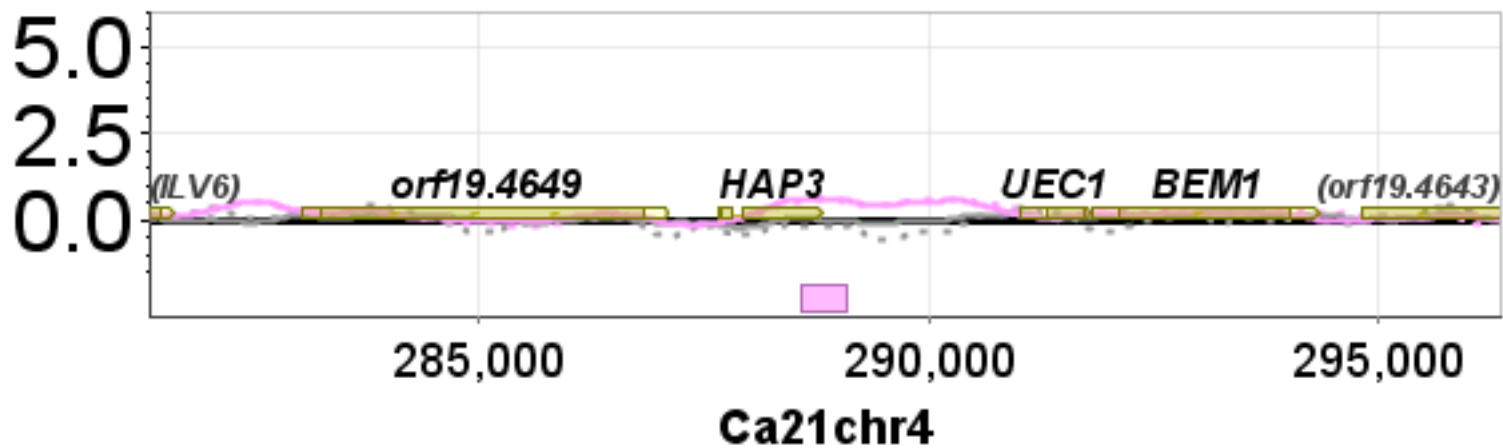

[0.624] Ca21chr6:263381-278380 [+] [ntar\_981, ntar\_980, orf19.3448, orf19.3447, orf19.3449]

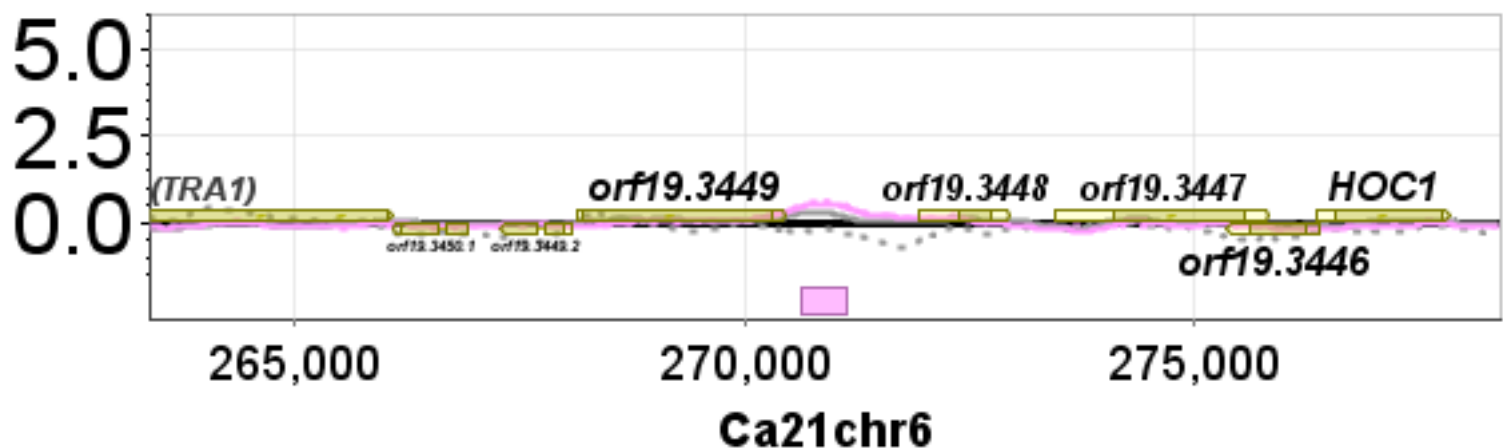

[0.623] Ca21chr2:400278-415277 [+] [orf19.1525, ntar\_323, SPR3, SNF2, FMO1]

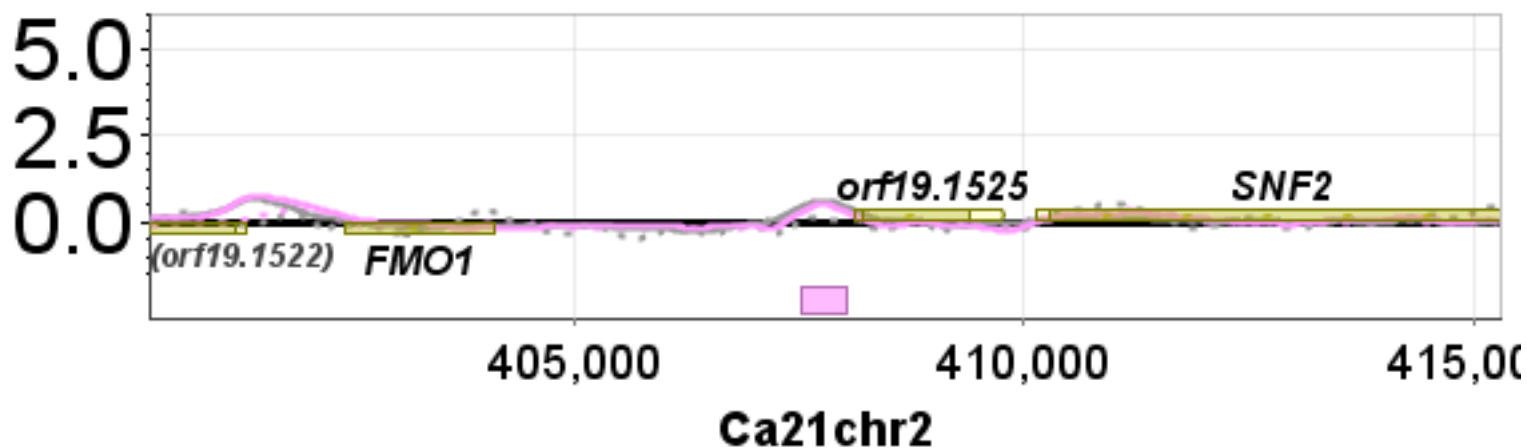

[0.622] Ca21chrR:1086190-1101189 [+] [GLN1, ntar\_1277, orf19.647.3, th(gug)1, orf19.645.1]

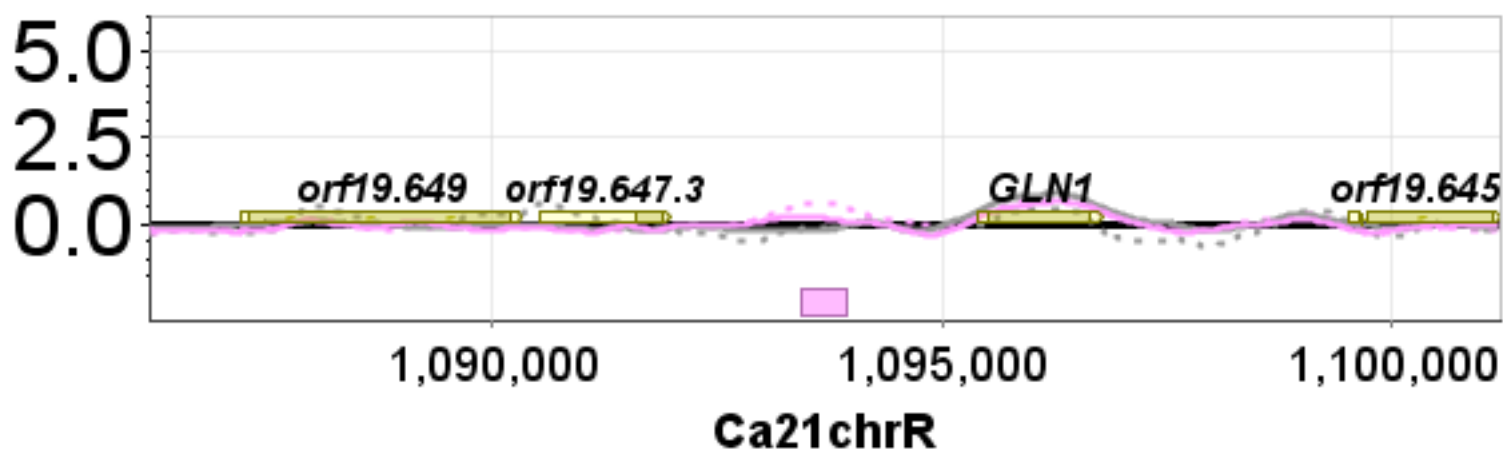

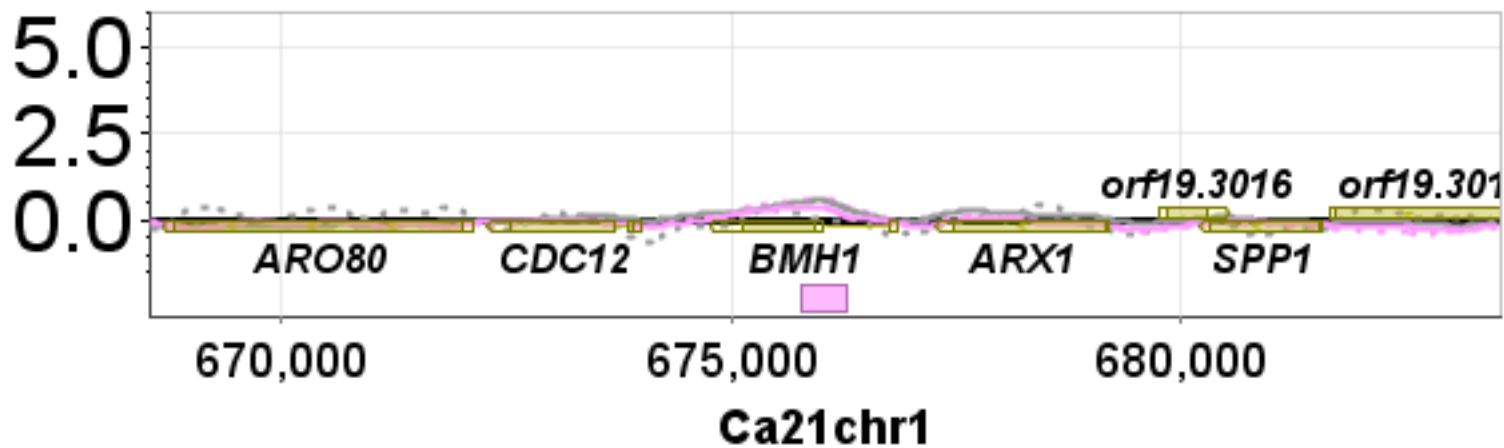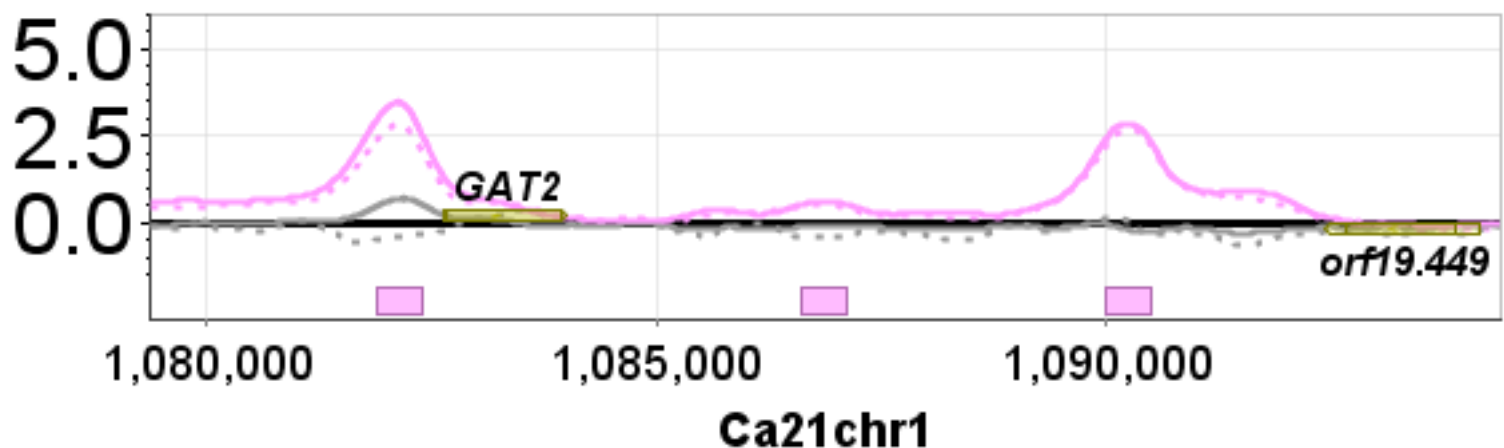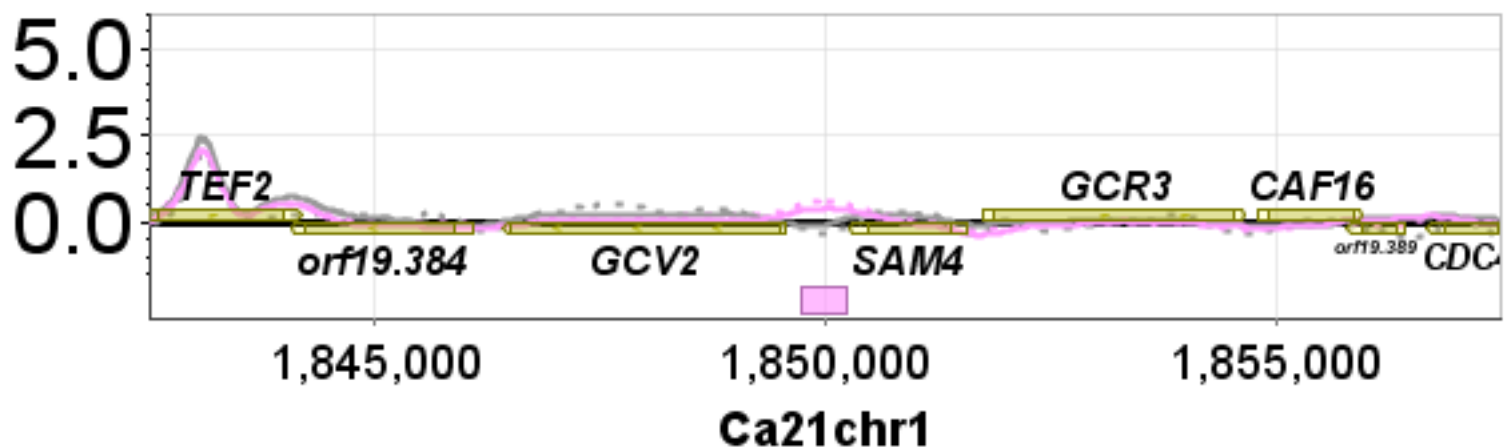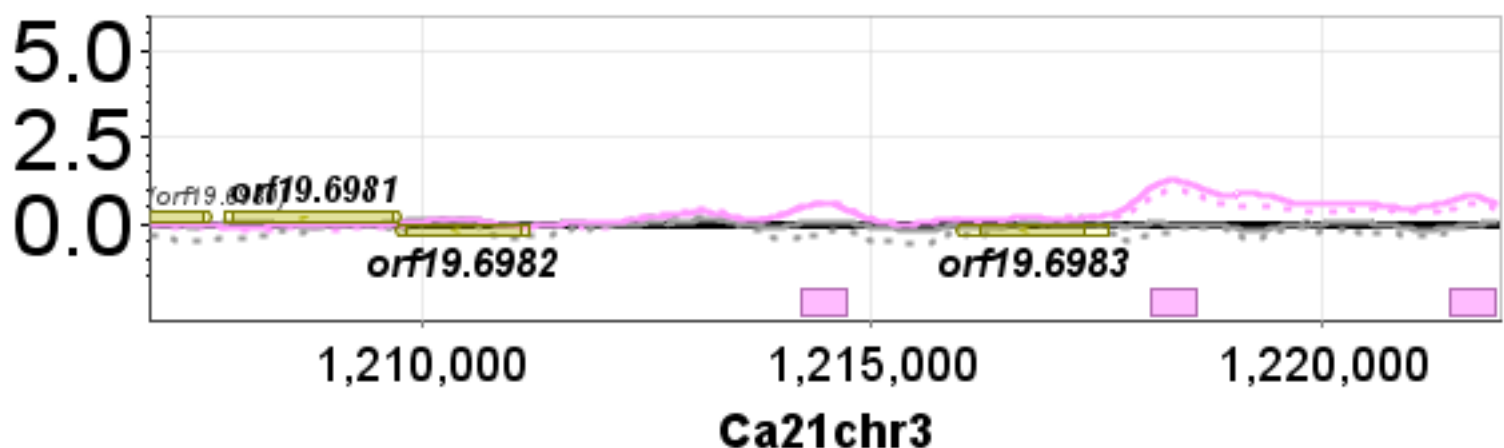



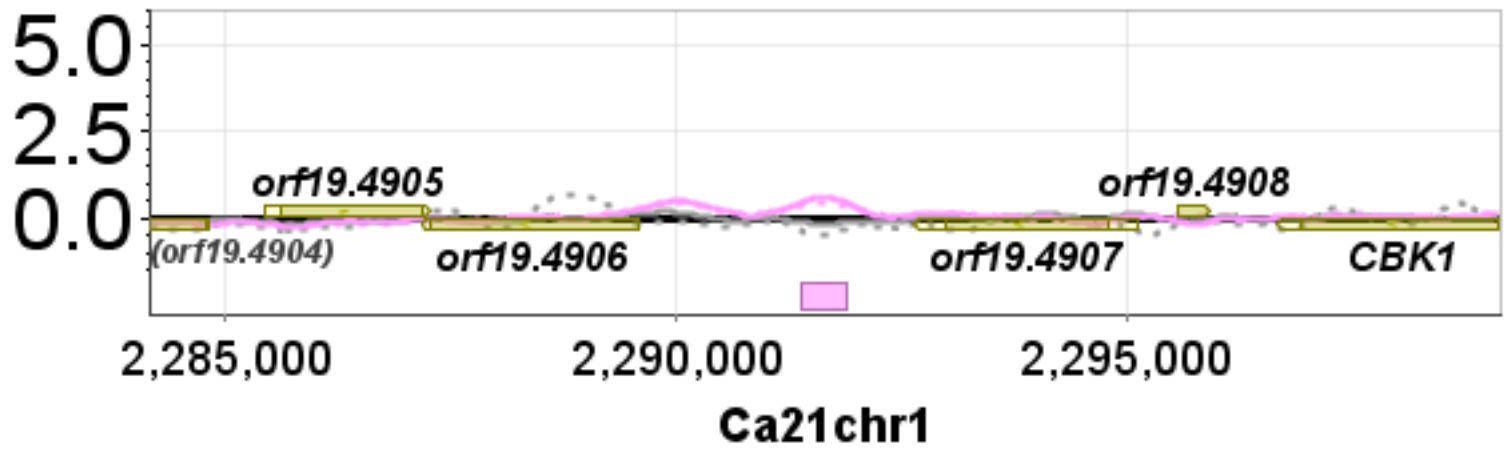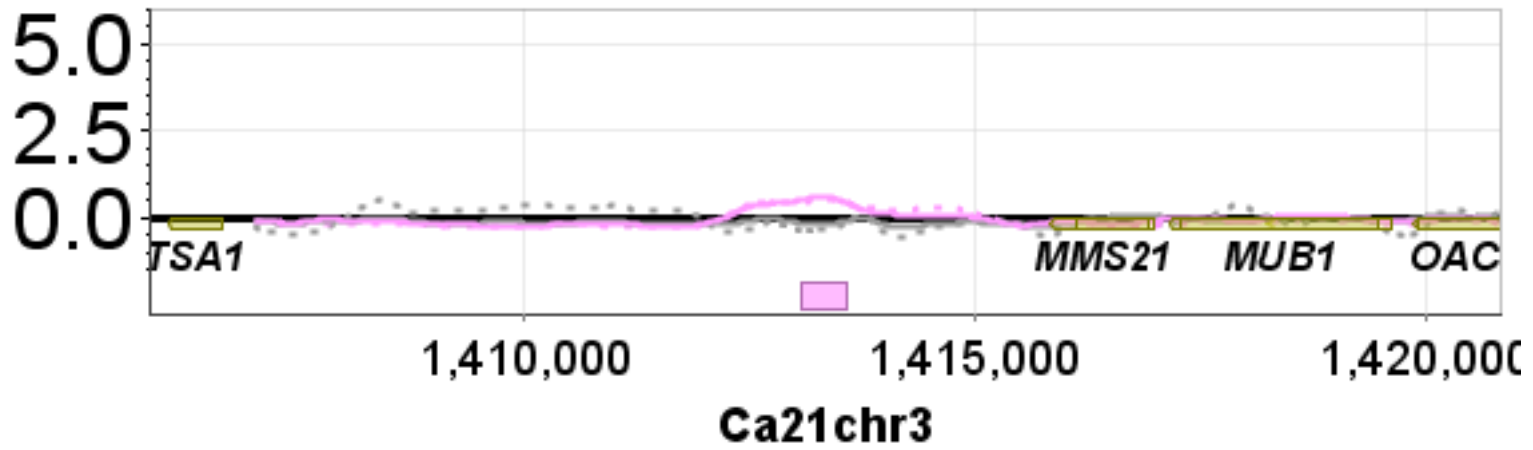

Supplement: NIHMS508843-supplement-Supp_File_S5.pdf [file NIHMS508843-supplement-Supp_File_S5.pdf]
