# Supplementary material
Source: PubMed Central journal article supplement (PMC3888361)

## **Full genome chromatin immunoprecipitation (ChIP-chip) mapping of Wor1 binding sites in opaque cells.**

Plots of 15kb regions centered on the set of 487 Wor1 binding sites in opaque cells, based on a reanalysis of the previously published Wor1 ChIP-chip data (Zordan, et al., 2007) using the same criteria as previously reported for the other five regulators (Lohse, et al., 2013). Smoothed enrichment data for the wild type strain is shown in orange, for the *wor1* deletion strain in grey. Data for both the Wor1 c-terminal peptide antibody (solid lines) and the Wor1 n-terminal peptide antibody (dashed lines) are shown. The 500bp called peaks of Wor1 enrichment are indicated by the orange boxes in the lower track in each image. Peaks are arranged in order of decreasing Wor1 enrichment. Enrichment ( $\log_2$ ) is indicated on the y-axis. Chromosomal locations and specific enrichment levels for the peak are indicated in the strip above each panel; when multiple peaks are present the enrichment value corresponds to the peak at the center of the plot. Yellow boxes correspond to genes; 5' or 3' untranslated regions are included as lighter shaded portions of the box. Genes plotted above the bold line read in the sense direction; genes plotted below the line read in the antisense direction. Plots produced using the SnapShot Function in MochiView v1.46 (Homann and Johnson, 2010).

[4.568] Ca21chr3:1581822-1596821 [+] [ntar\_667, ntar\_666, orf19.6805, ntar\_665, orf19.6807]

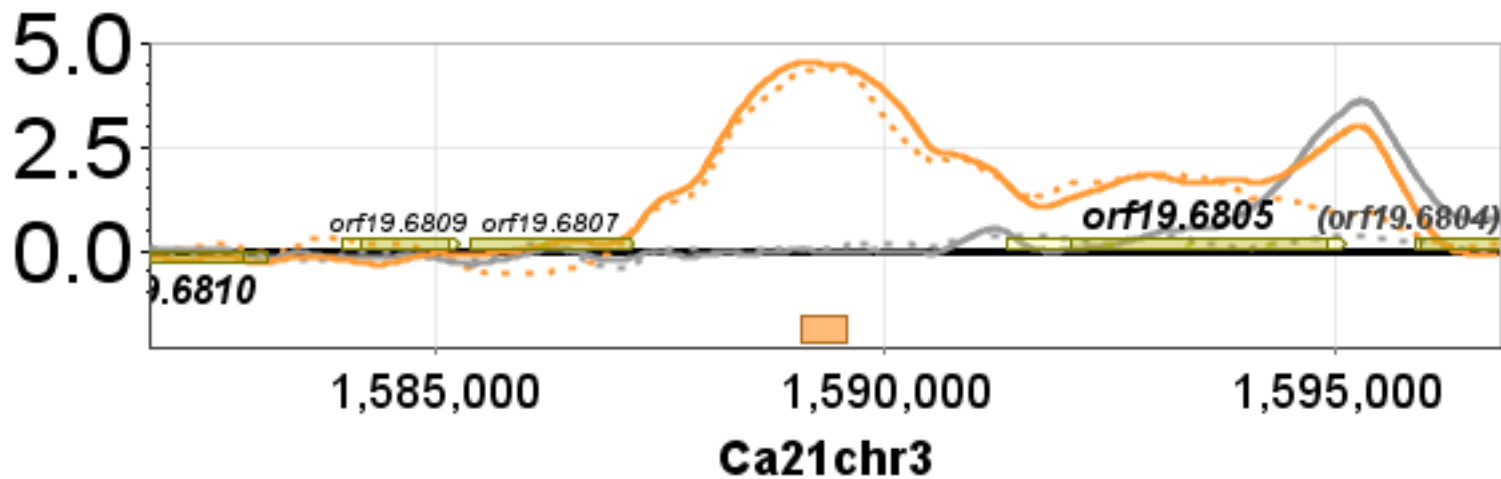

[4.084] Ca21chrR:584320-599319 [+] [orf19.2822, orf19.2821, RFG1]

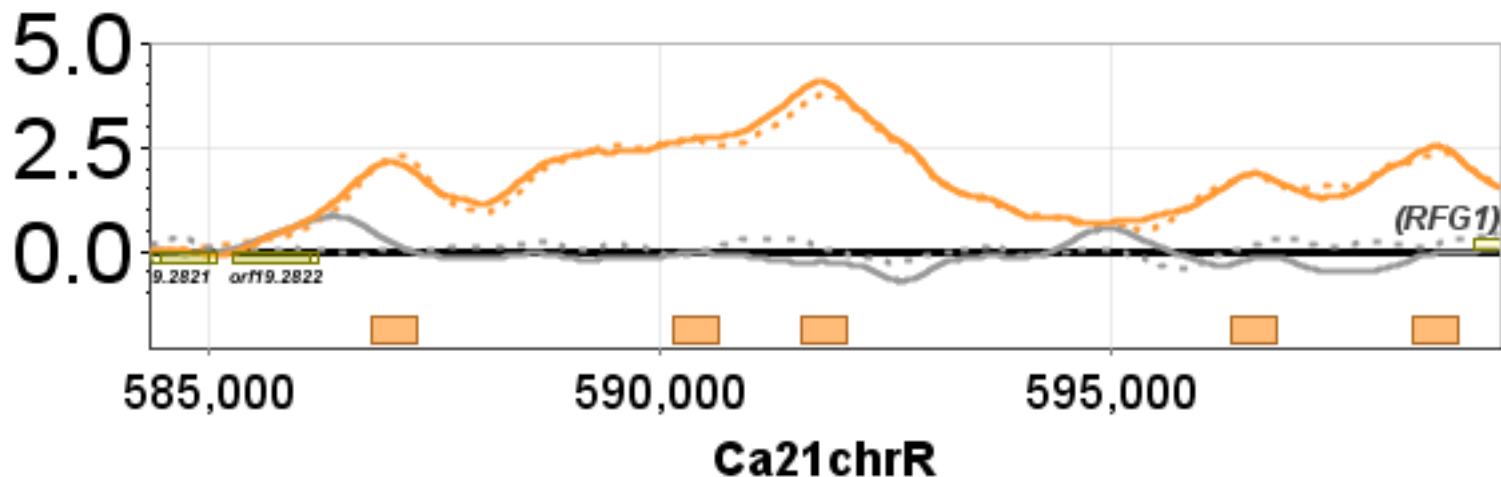

[3.992] Ca21chr1:2217048-2232047 [+] [ntar\_207, WOR1, orf19.4883, ntar\_206, orf19.4882]

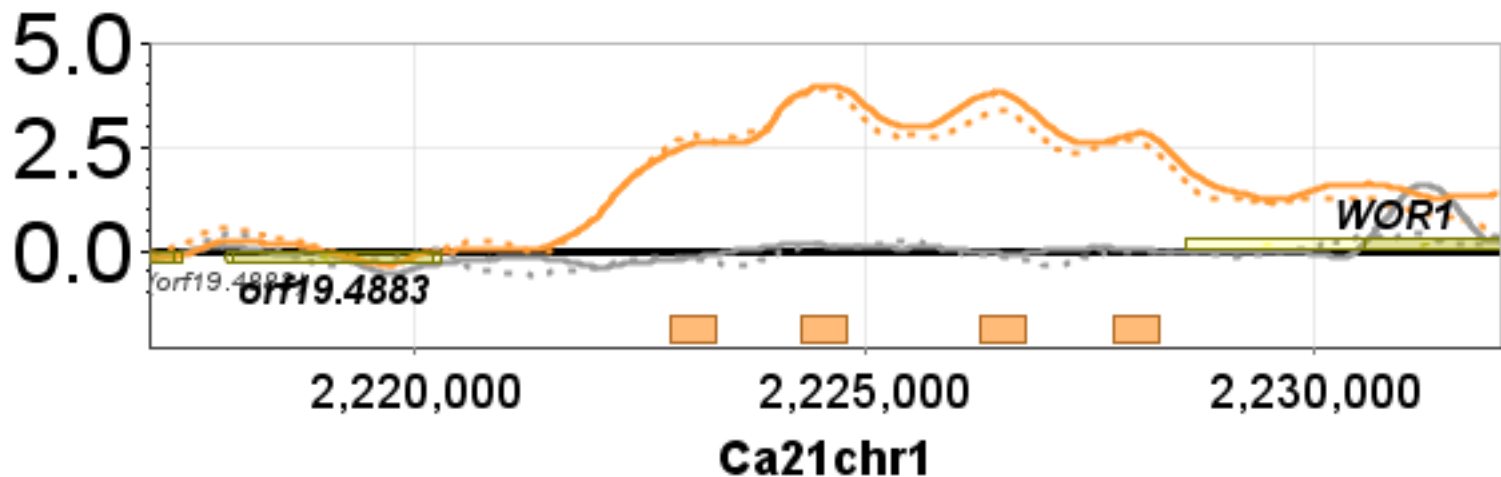

[3.81] Ca21chr1:2219024-2234023 [+] [WOR1, ntar\_207, orf19.4883]

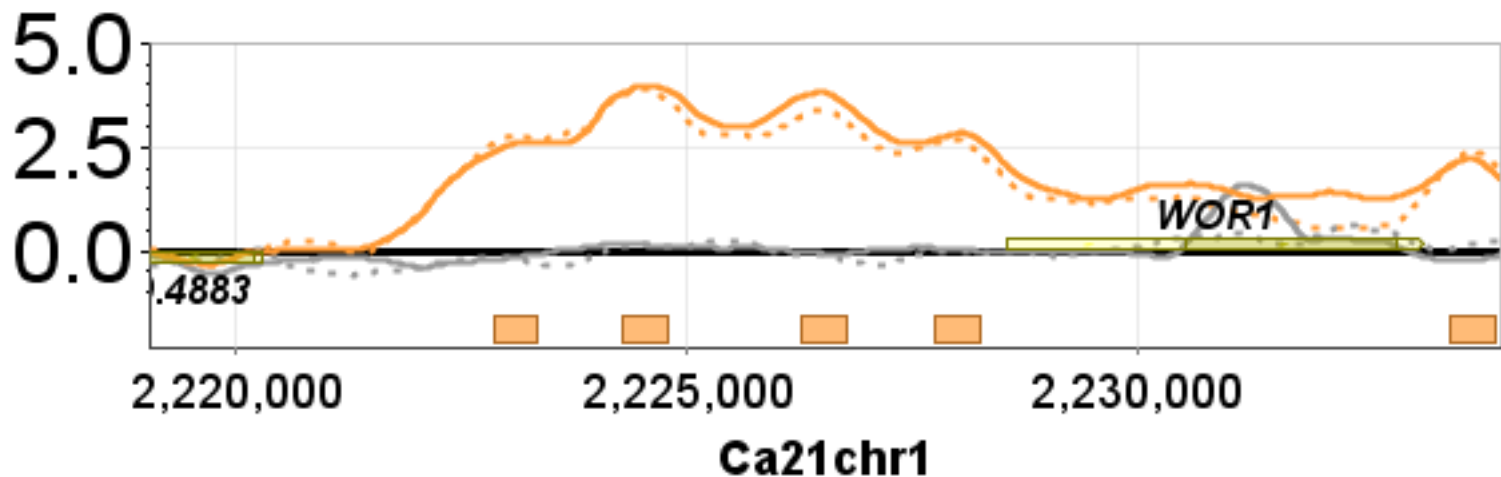

[3.601] Ca21chr3:1717806-1732805 [+] [orf19.6736, TCC1, ntar\_685, orf19.6732]

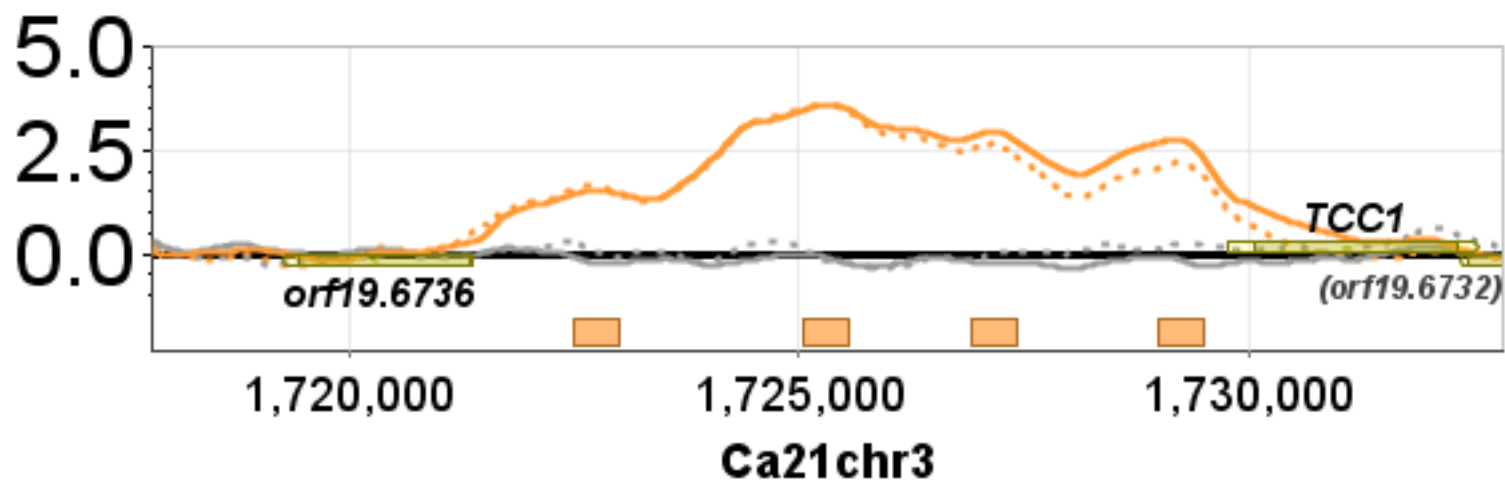

[3.556] Ca21chrR:867414-882413 [+] [orf19.467, IFF9]

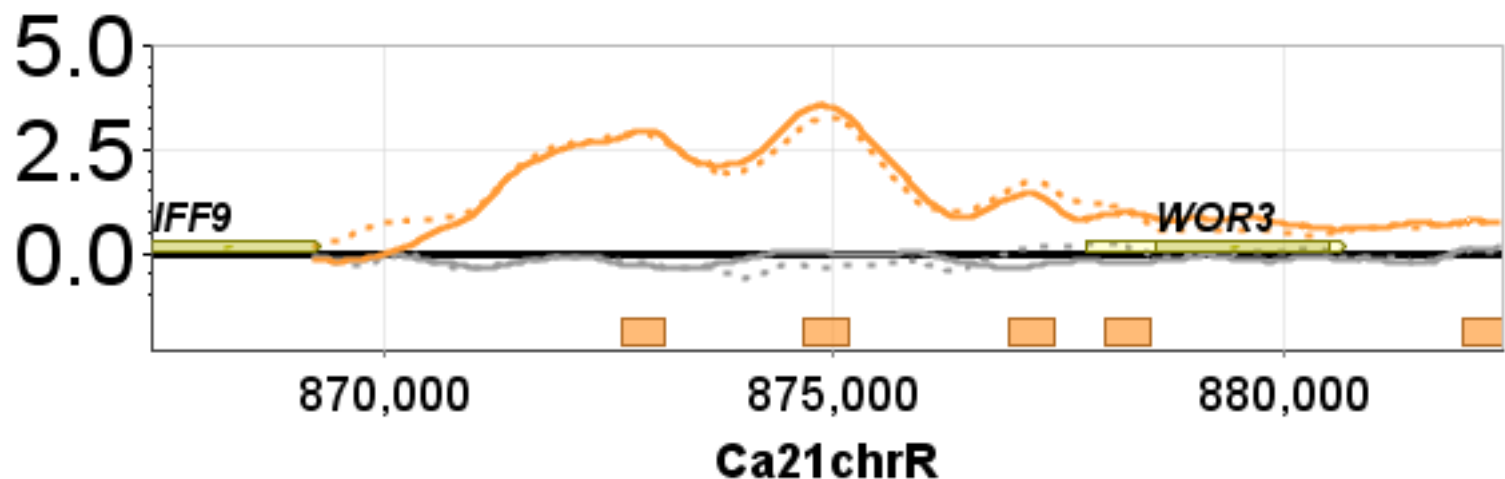

[3.434] Ca21chr3:1357939-1372938 [+] [CAM1, MNN9, orf19.7381, NOG1]

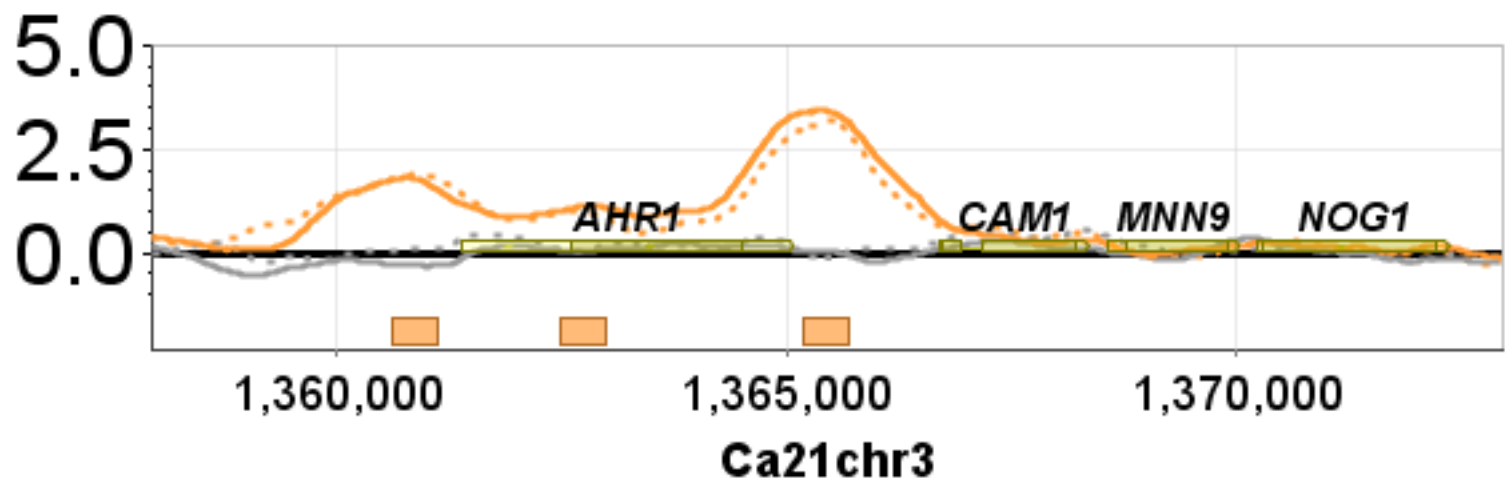

[3.378] Ca21chr3:1114156-1129155 [+] [ntar\_614, ntar\_615, ntar\_616, ntar\_617, WOR2]

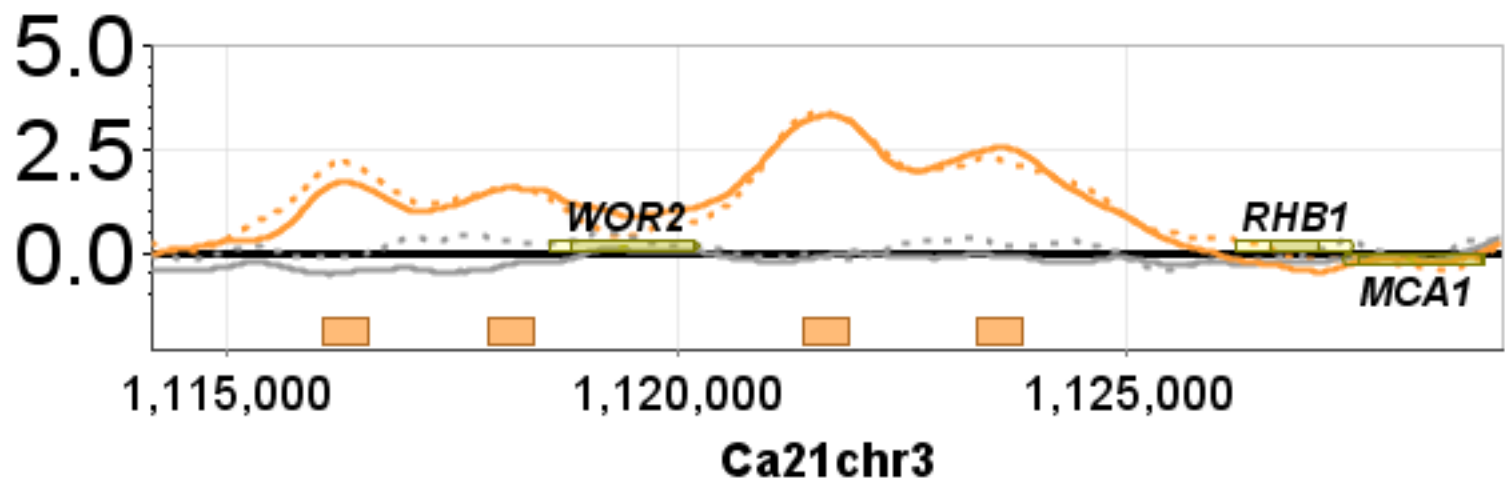

[3.227] Ca21chr1:1982707-1997706 [+] [IPT1, orf19.4768, orf19.4767, ntar\_186, orf19.4766]

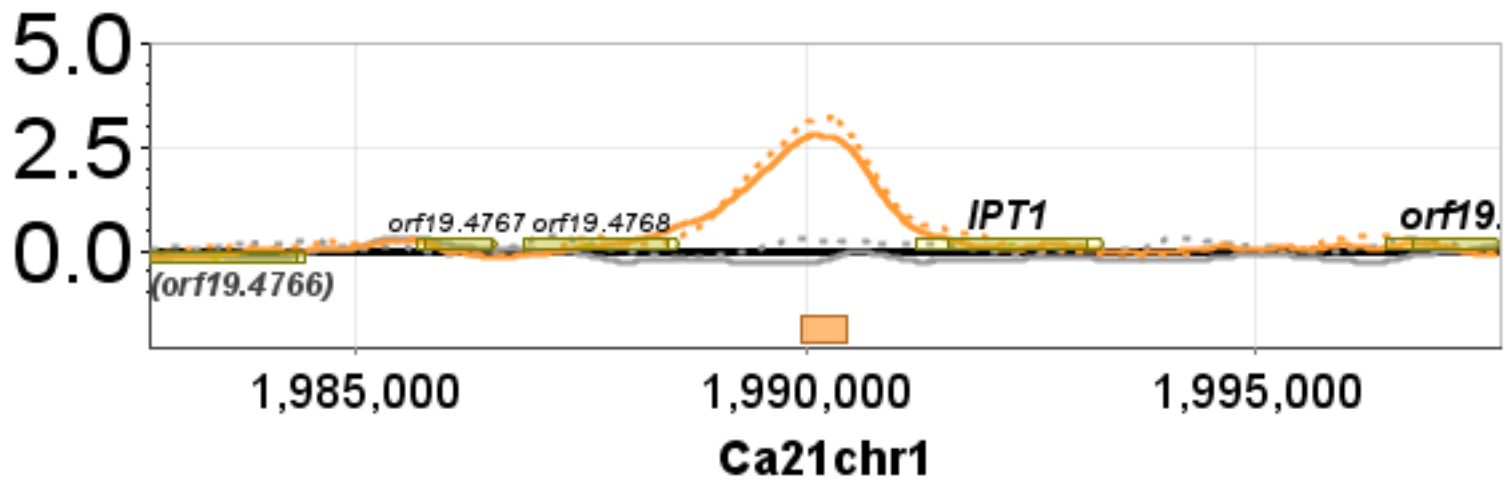

[3.124] Ca21chr1:564570-579569 [+] [orf19.2962, orf19.2963, orf19.2961, FRS2, ntar\_60]

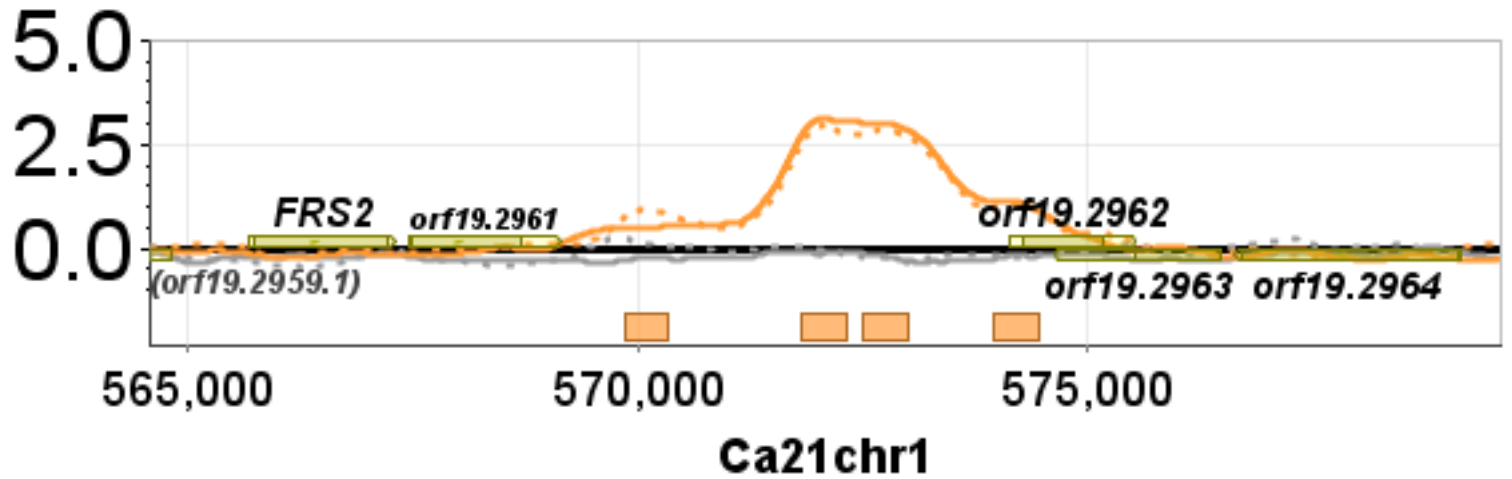

[3.048] Ca21chr1:2267281-2282280 [+] [ntar\_209, orf19.4900, GCA1, ntar\_210, orf19.4901]

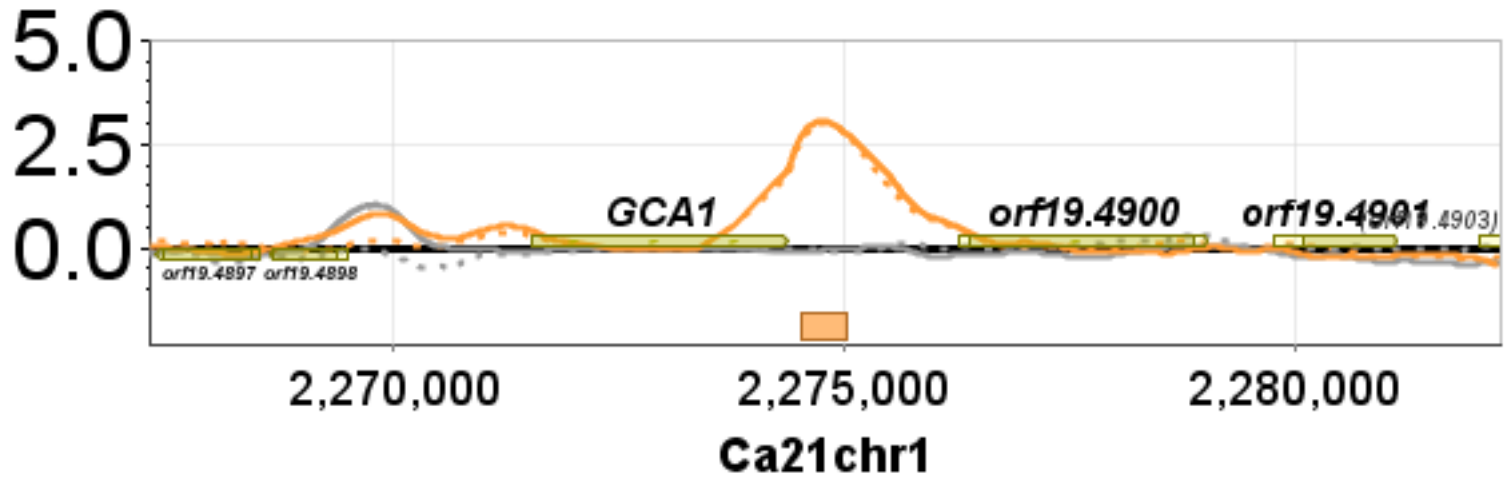

[3.023] Ca21chrR:2076773-2091772 [+] [ntar\_1396.5, ntar\_1397.1, ntar\_1396, ntar\_1398, ntar\_1395]

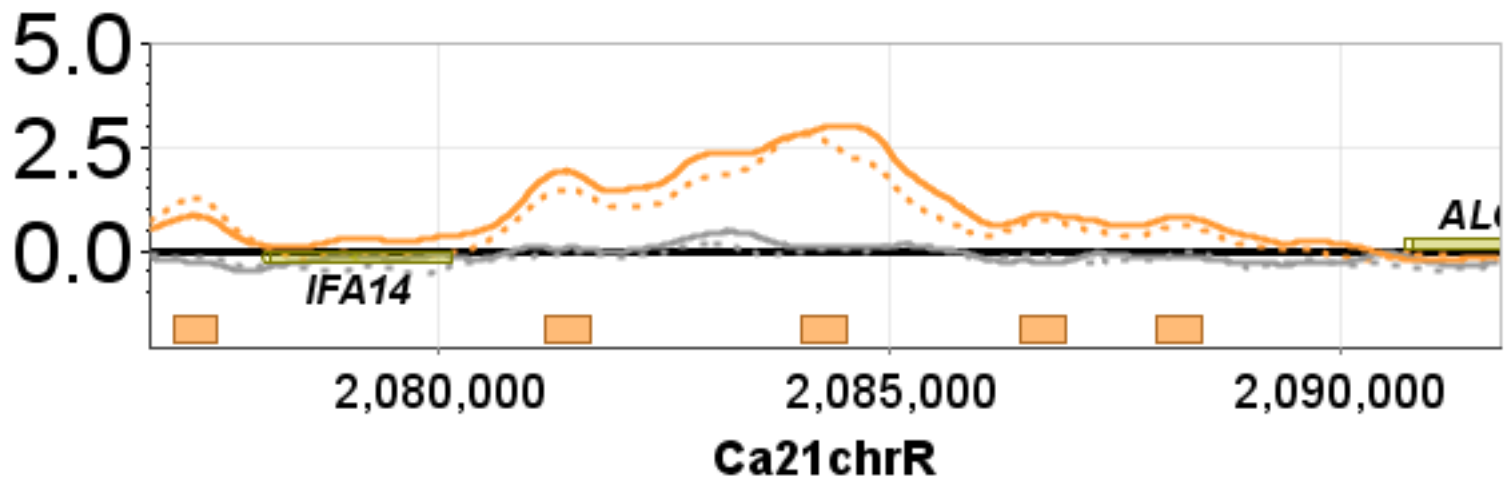

[2.965] Ca21chrR:865385-880384 [+] [orf19.467, IFF9]

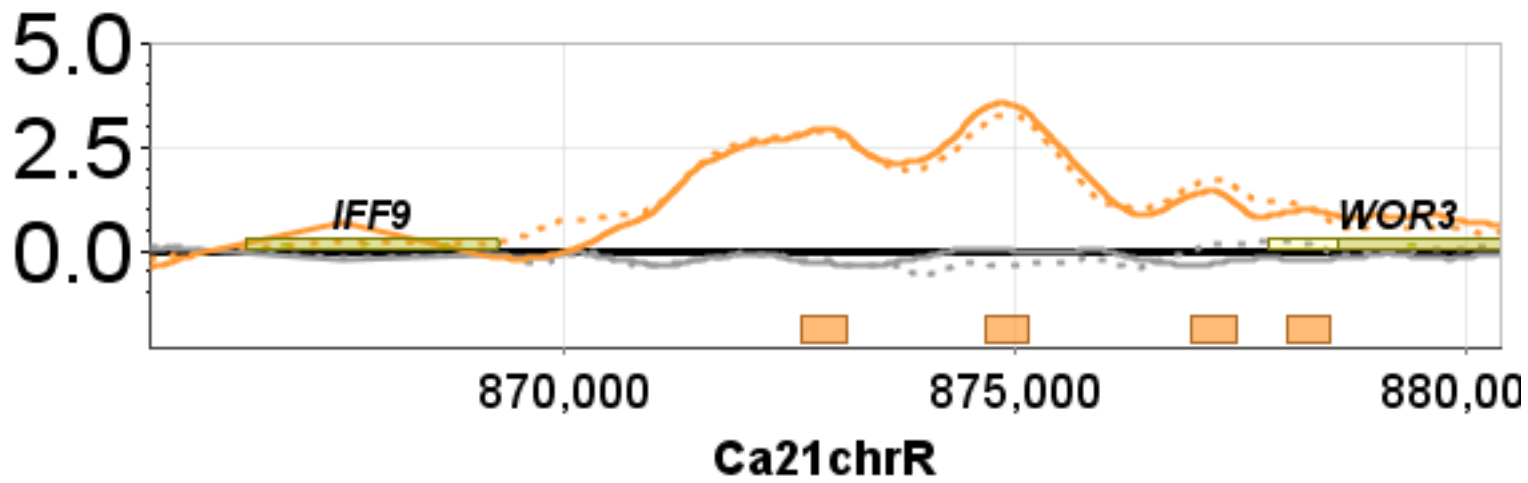

[2.959] Ca21chr3:1719682-1734681 [+] [TCC1, orf19.6736, orf19.6732, orf19.6731.1, orf19.6731]

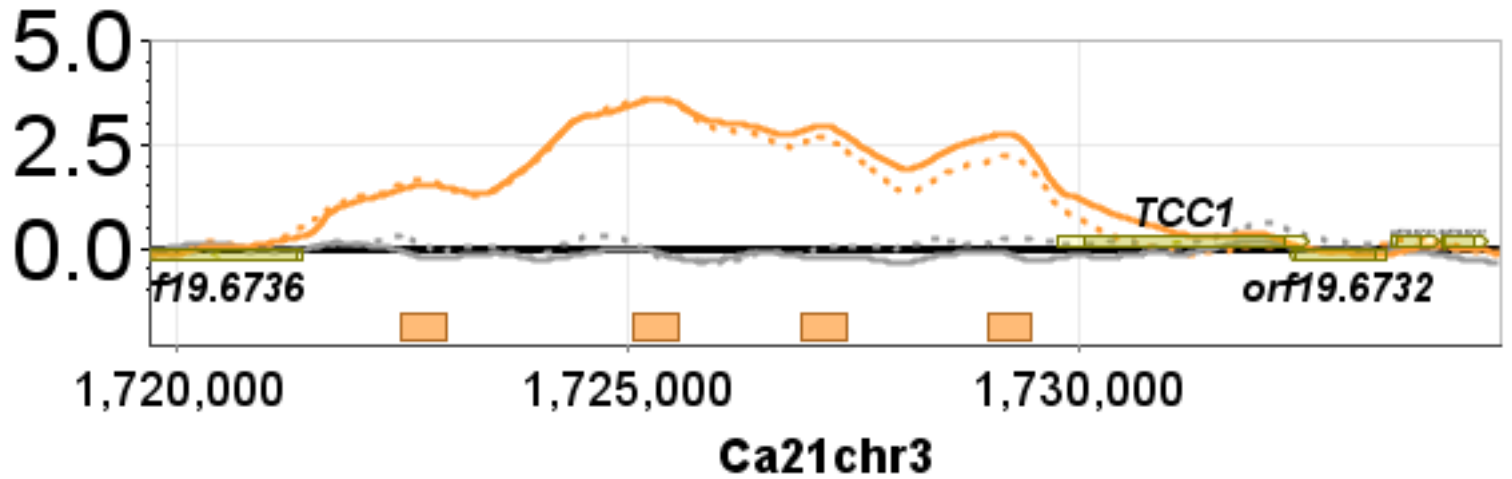

[2.939] Ca21chr2:1863232-1878231 [+] [ntar\_470, IFF6, ntar\_471, MET10, ntar\_469]

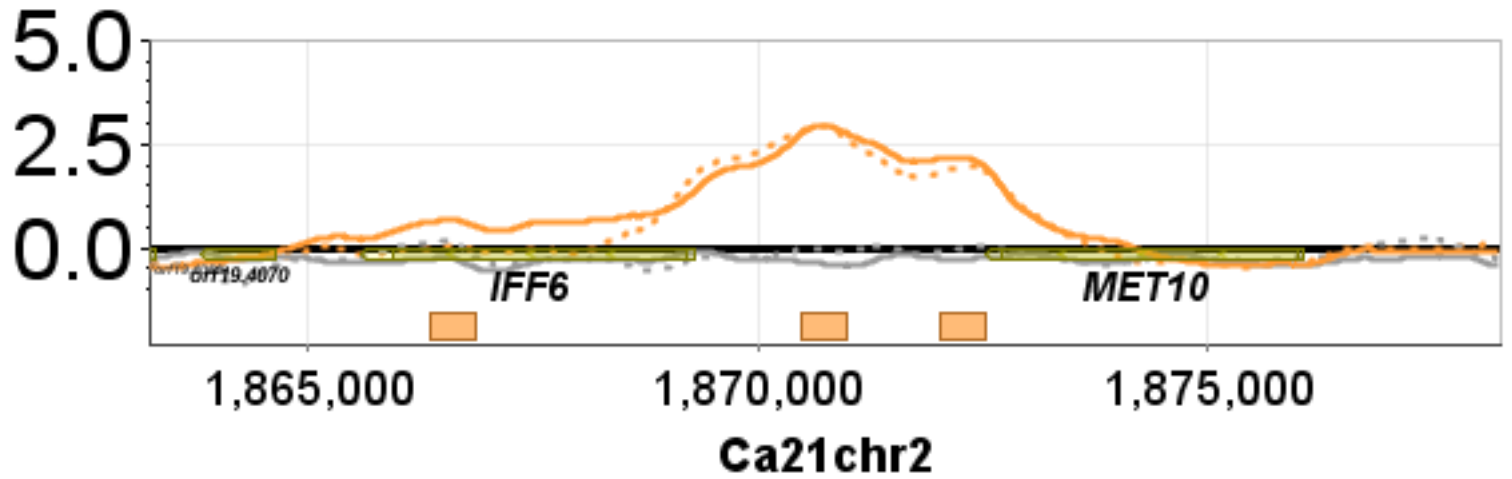

[2.901] Ca21chr7:904979-919978 [+] [ntar\_1151, ntar\_1152, orf19.7151, ntar\_1153, orf19.7152]

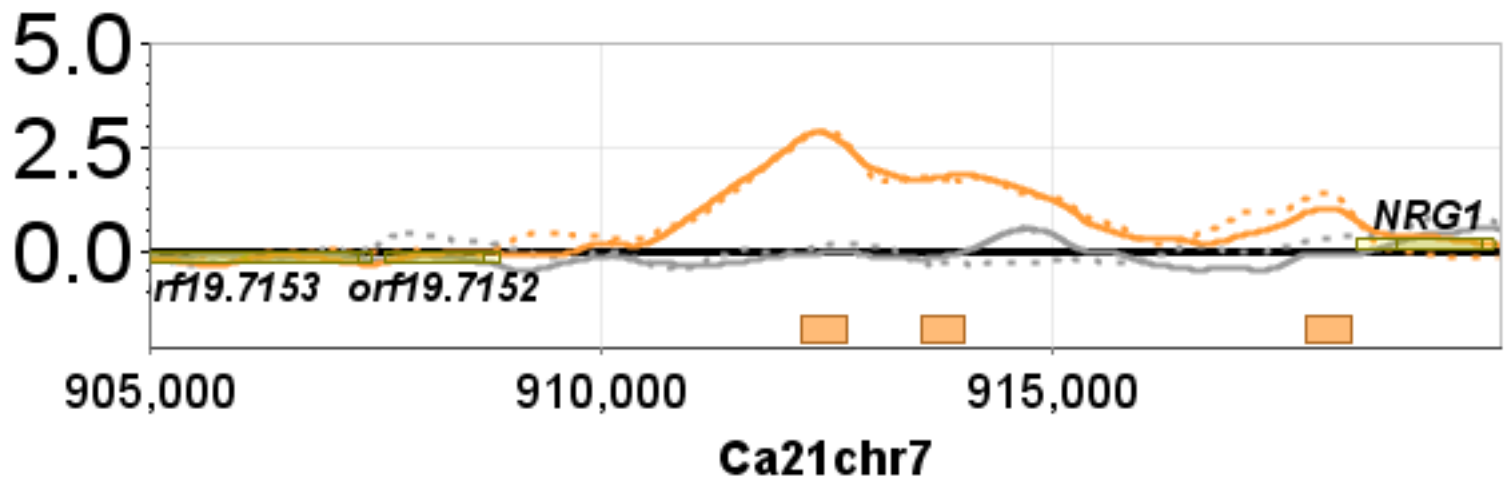

[2.889] Ca21chr2:736606-751605 [+] [ADAEC, orf19.867, ntar\_354, RAD32, orf19.864]

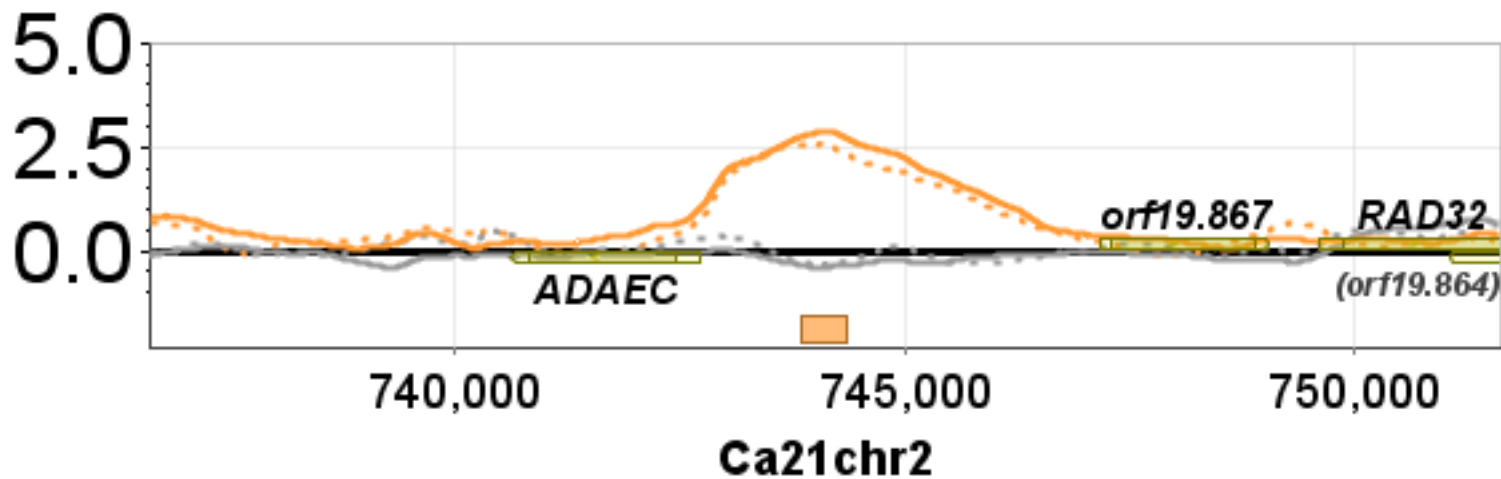

[2.871] Ca21chr5:247294-262293 [+] [orf19.1958, orf19.1959, ntar\_866, ntar\_867, ntar\_864]

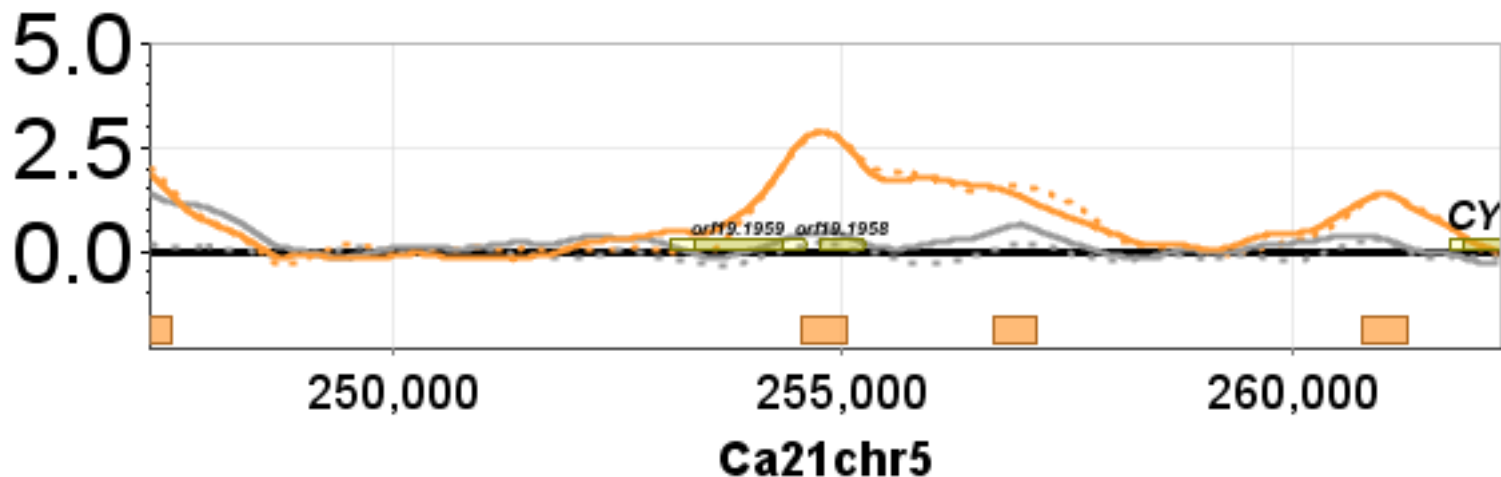

[2.852] Ca21chr1:565239-580238 [+] [orf19.2962, orf19.2963, orf19.2961, orf19.2964, orf19.2965]

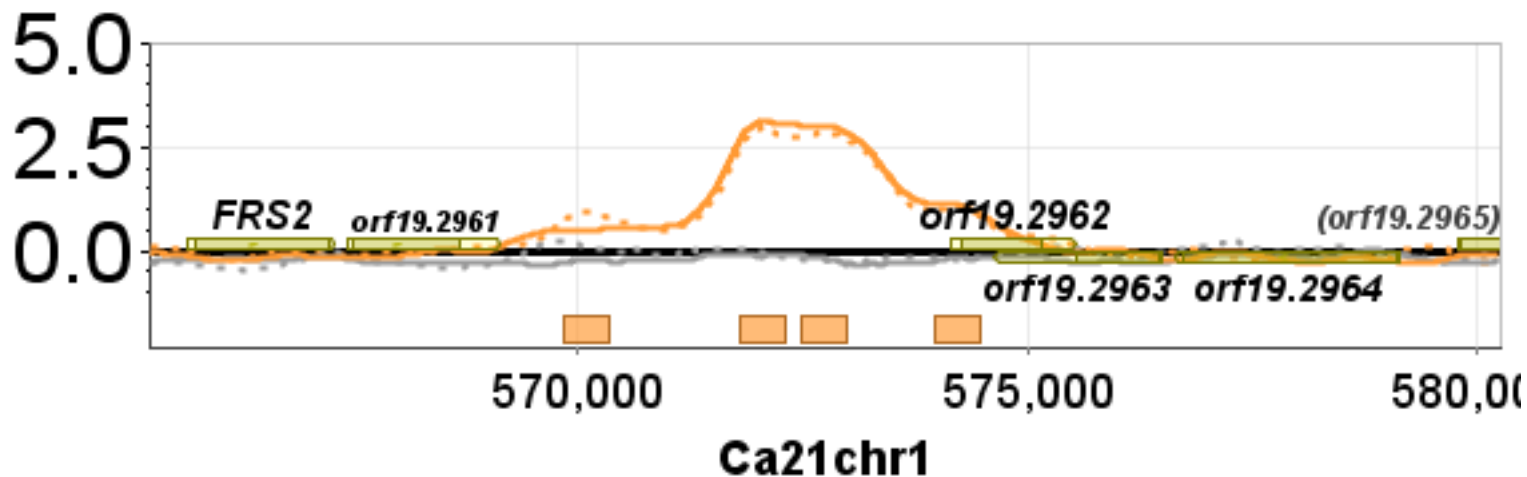

[2.847] Ca21chr1:2220515-2235514 [+] [WOR1, ntar\_207]

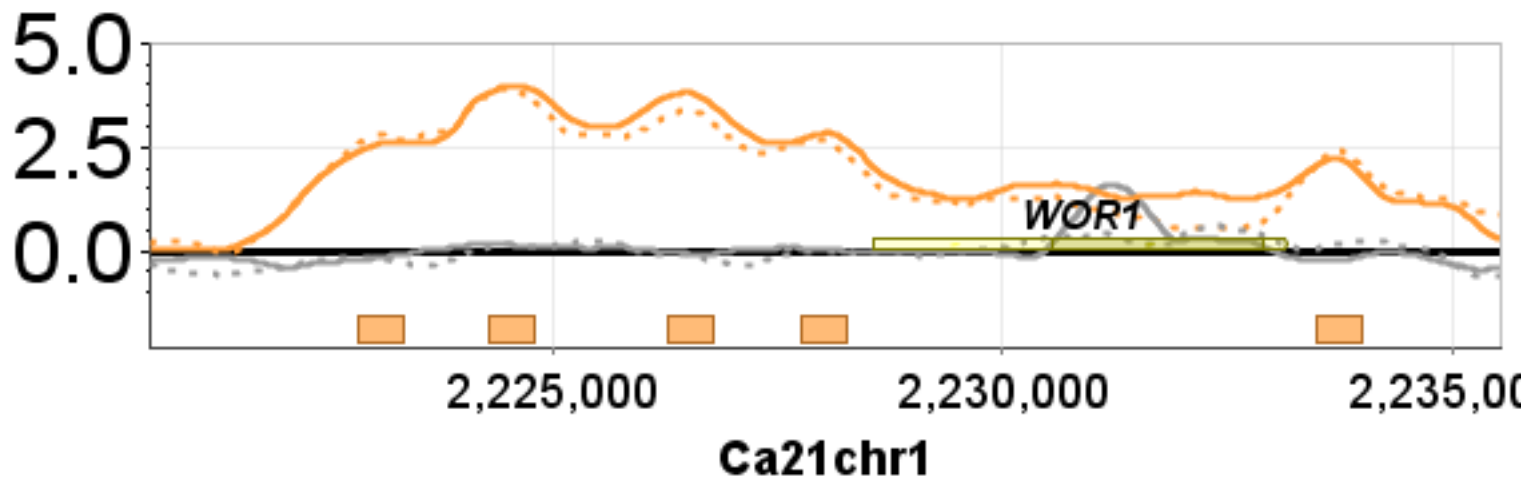

[2.845] Ca21chr2:778006-793005 [+] [orf19.849, orf19.850, orf19.848, tr(ucu)2, tf(gaa)2]

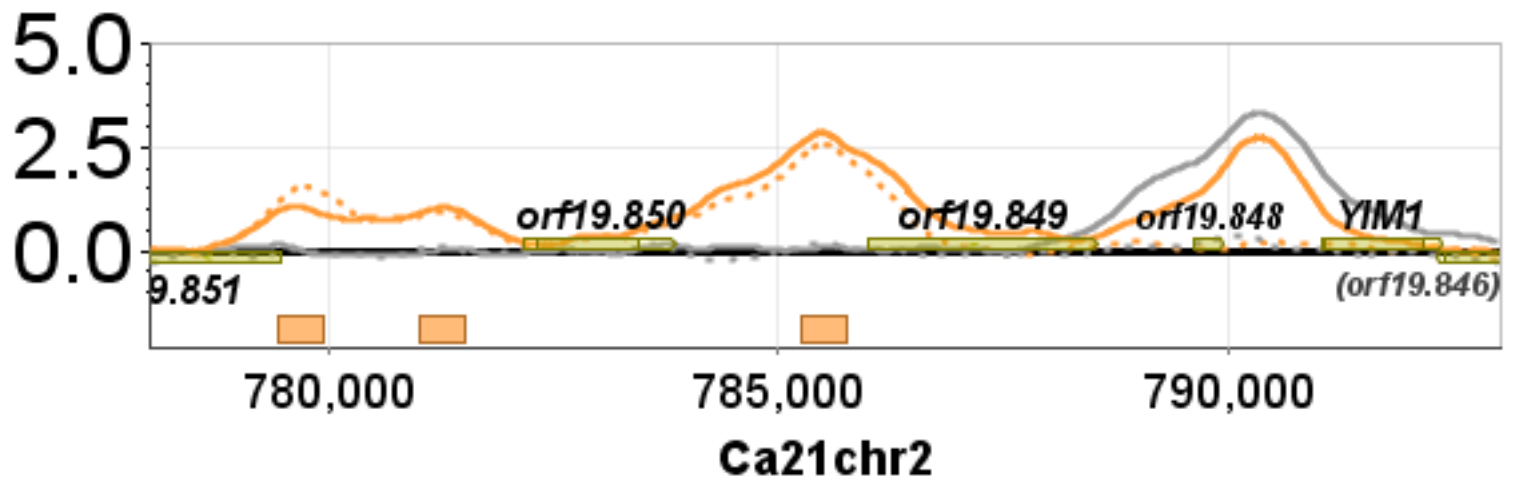

[2.777] Ca21chr1:2215600-2230599 [+] [ntar\_207, orf19.4883, WOR1, ntar\_206, orf19.4882]

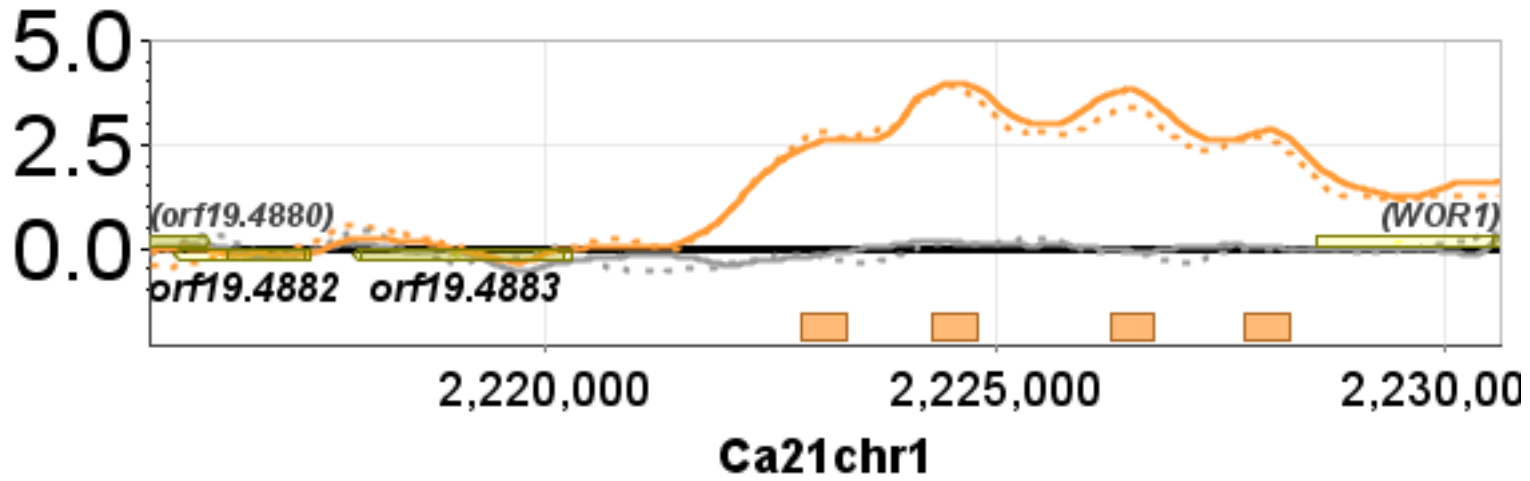

[2.767] Ca21chrR:259535-274534 [+] [ntar\_1179.1, ntar\_1179.2, ntar\_1178, ntar\_1180, ntar\_1179.3]

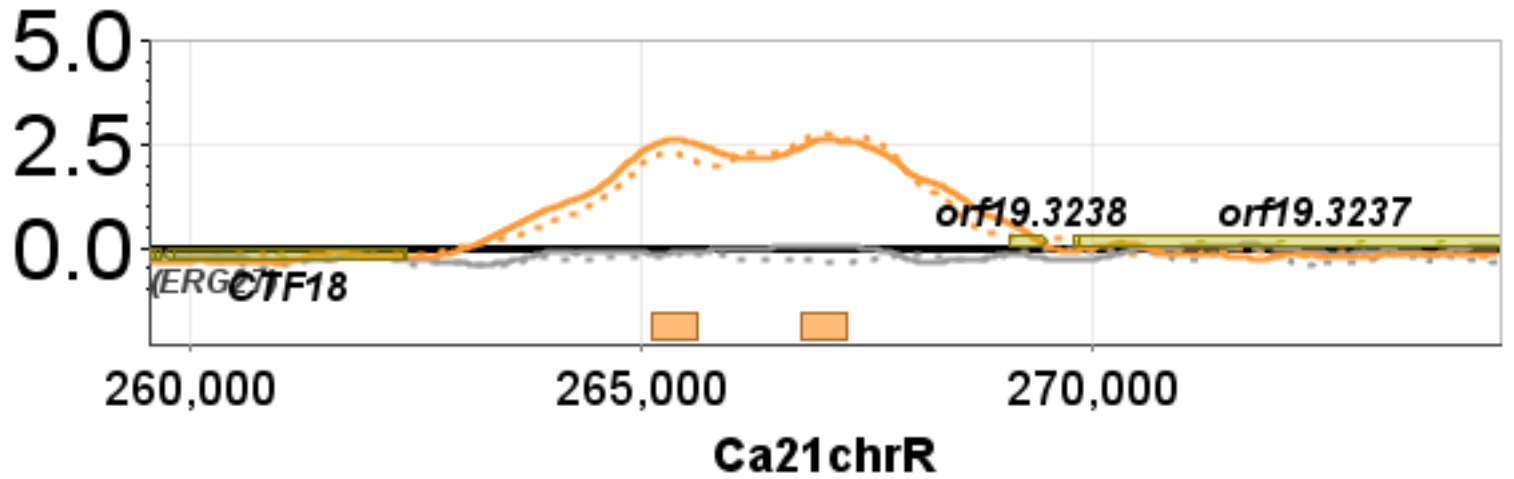

[2.754] Ca21chr1:1070156-1085155 [+] [GAT2, orf19.4057, orf19.4059, orf19.450]

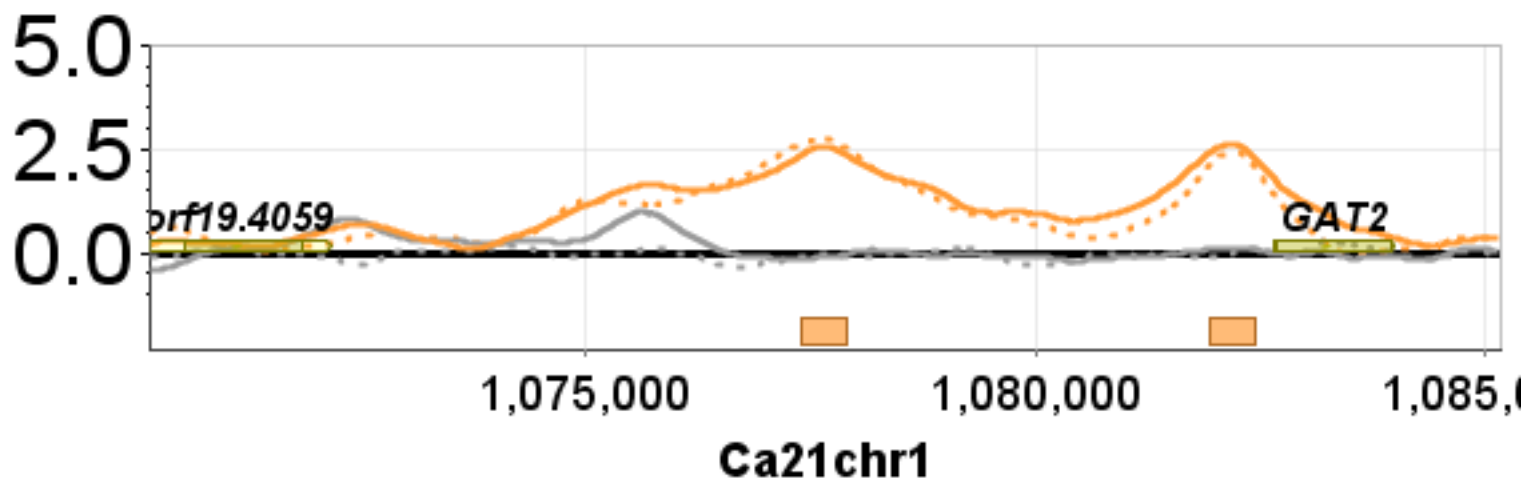

[2.732] Ca21chr3:1721742-1736741 [+] [TCC1, orf19.6732, orf19.6731.1, orf19.6731, ntar\_686]

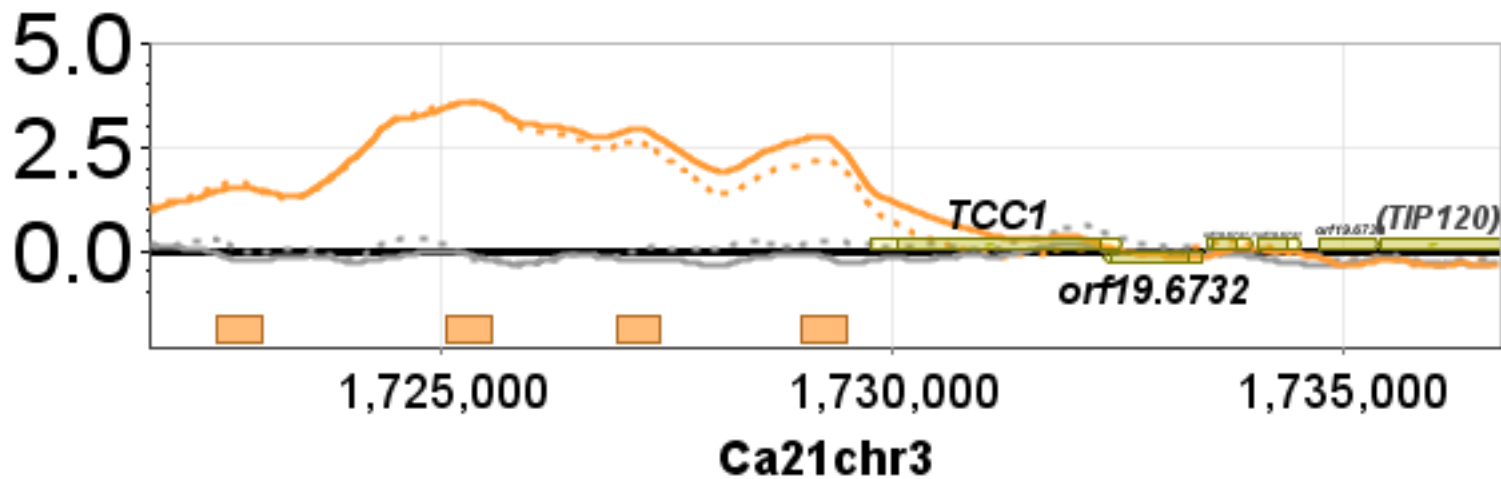

[2.726] Ca21chr5:585349-600348 [+] [MNN1, orf19.4280, orf19.4278, orf19.4281, orf19.4282]

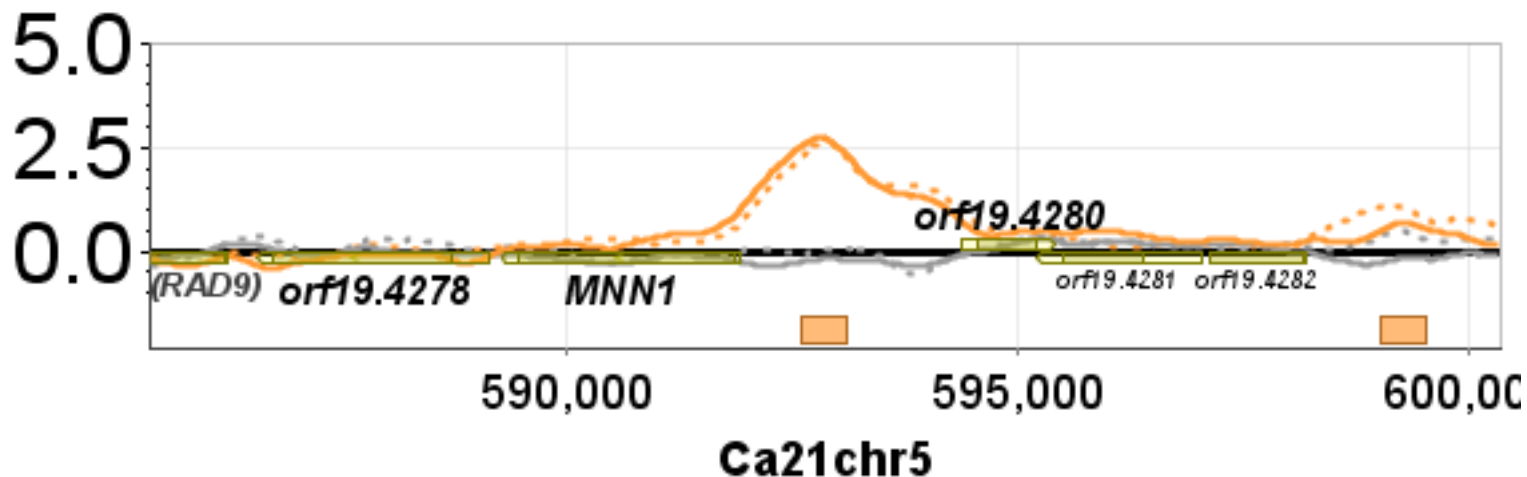

[2.714] Ca21chr1:2340226-2355225 [+] [ntar\_222, ntar\_221, orf19.1831, FCY23, ntar\_220]

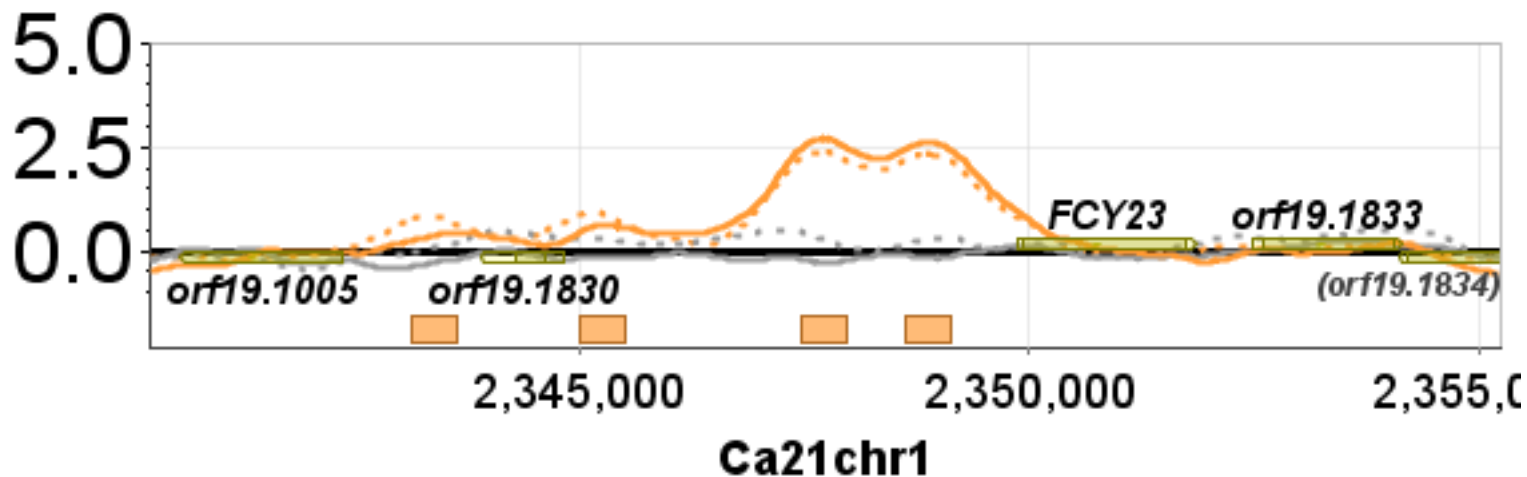

[2.66] Ca21chr5:110396-125395 [+] [orf19.934, orf19.933, ntar\_855, AGA1, orf19.932]

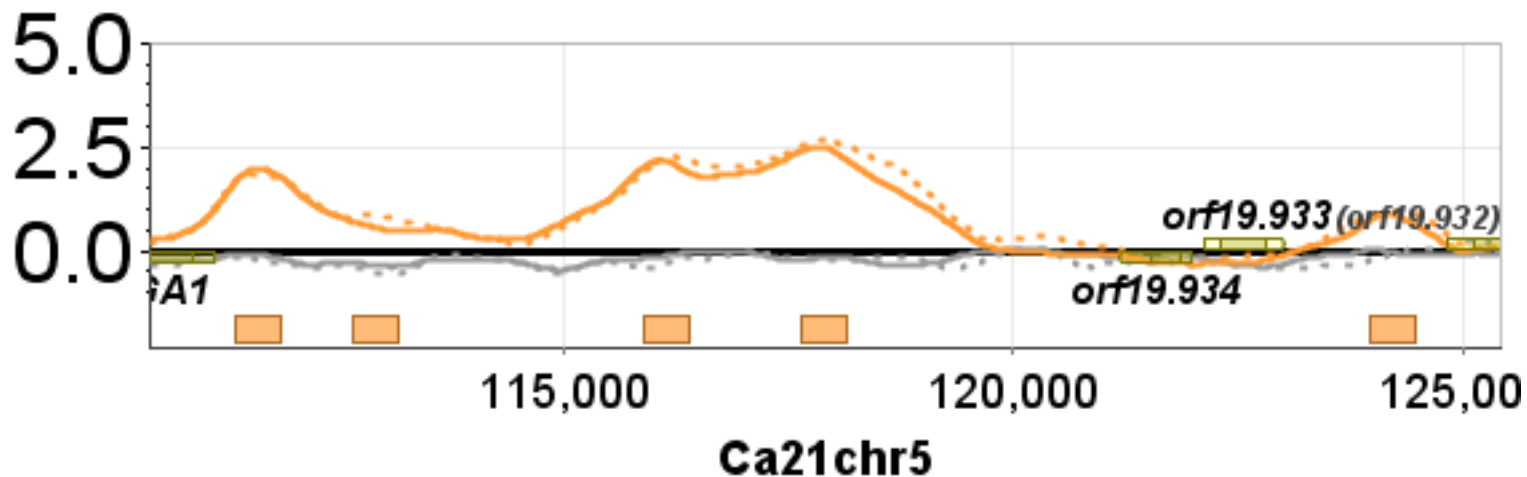



[2.66] Ca21chrR:582900-597899 [+] [orf19.2822, orf19.2821, orf19.2820]

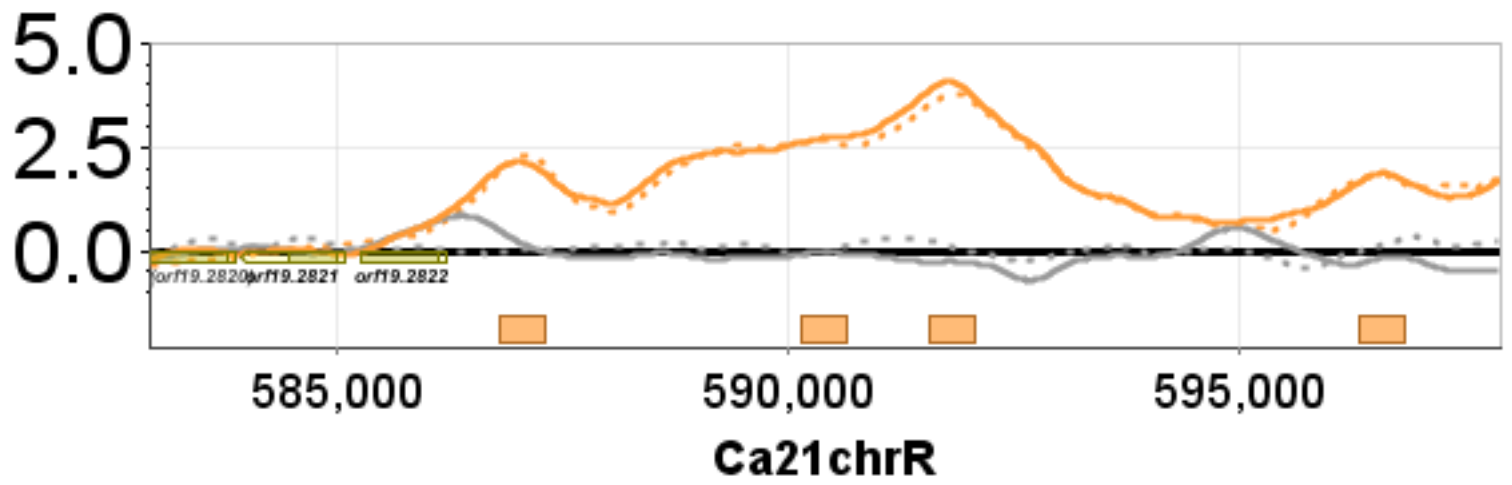

[2.622] Ca21chr3:1751754-1766753 [+] [orf19.6715, ntar\_688, orf19.6713, ABD1, orf19.6712]

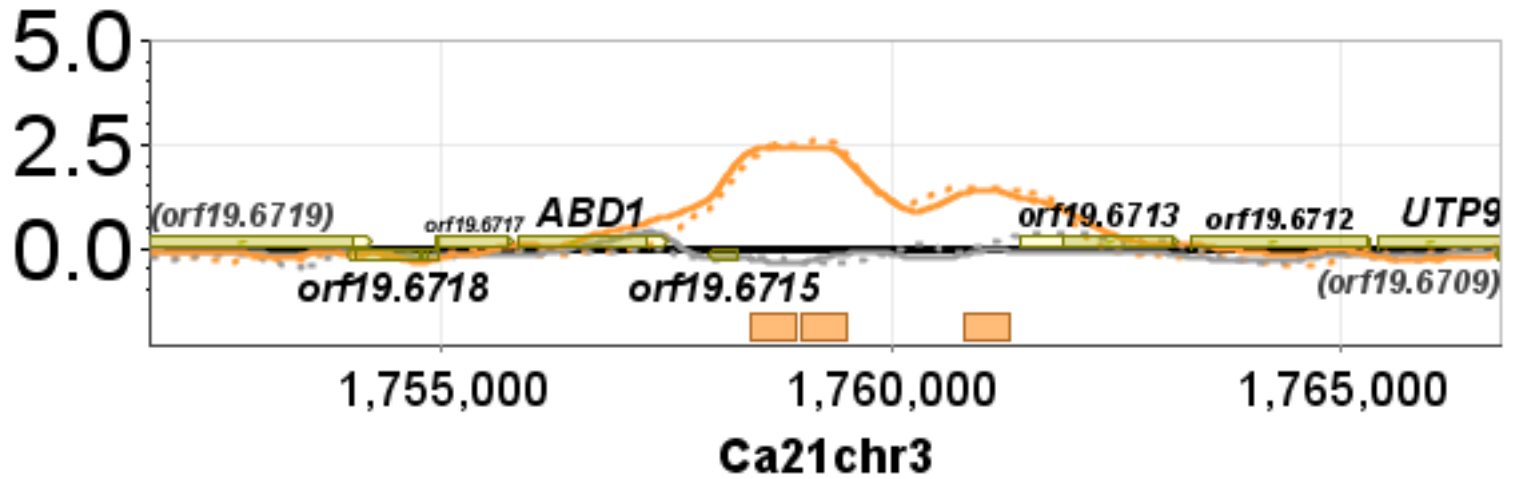

[2.61] Ca21chrR:257867-272866 [+] [ntar\_1177, ntar\_1176, ntar\_1178, ntar\_1175.5, ntar\_1179.1]

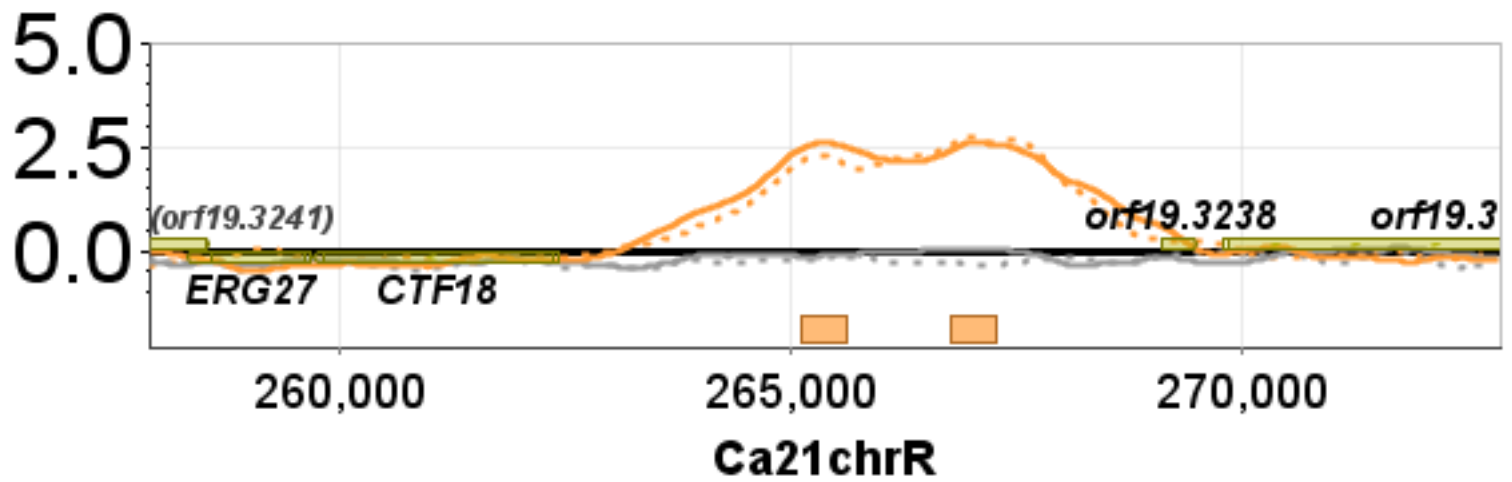

[2.605] Ca21chr1:440627-455626 [+] [ntar\_43, ntar\_42, GAL1, orf19.3671, SHA3]

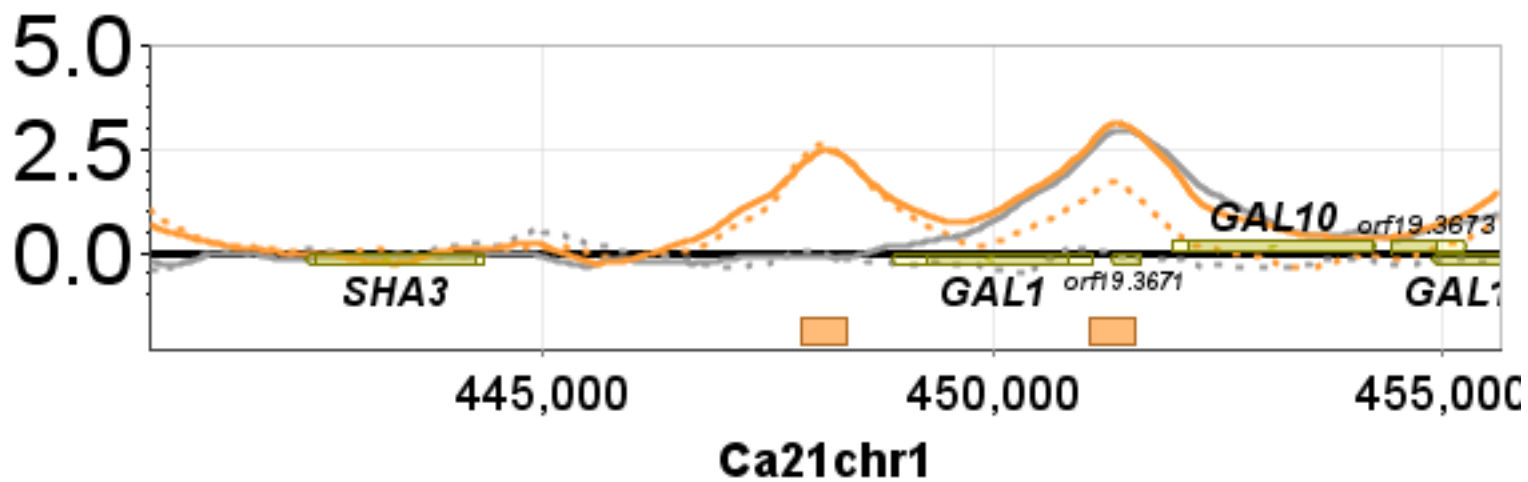

[2.604] Ca21chr1:1074704-1089703 [+] [GAT2, orf19.450, ntar\_104]

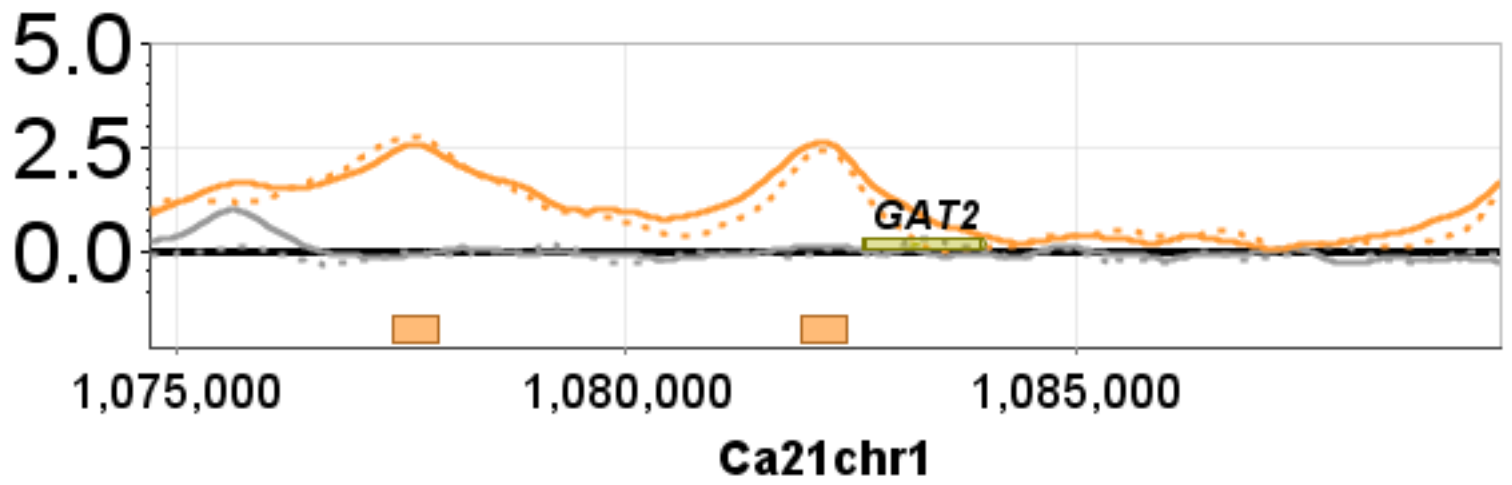

[2.602] Ca21chr1:2341378-2356377 [+] [orf19.1831, ntar\_222, FCY23, ntar\_221, ntar\_223]

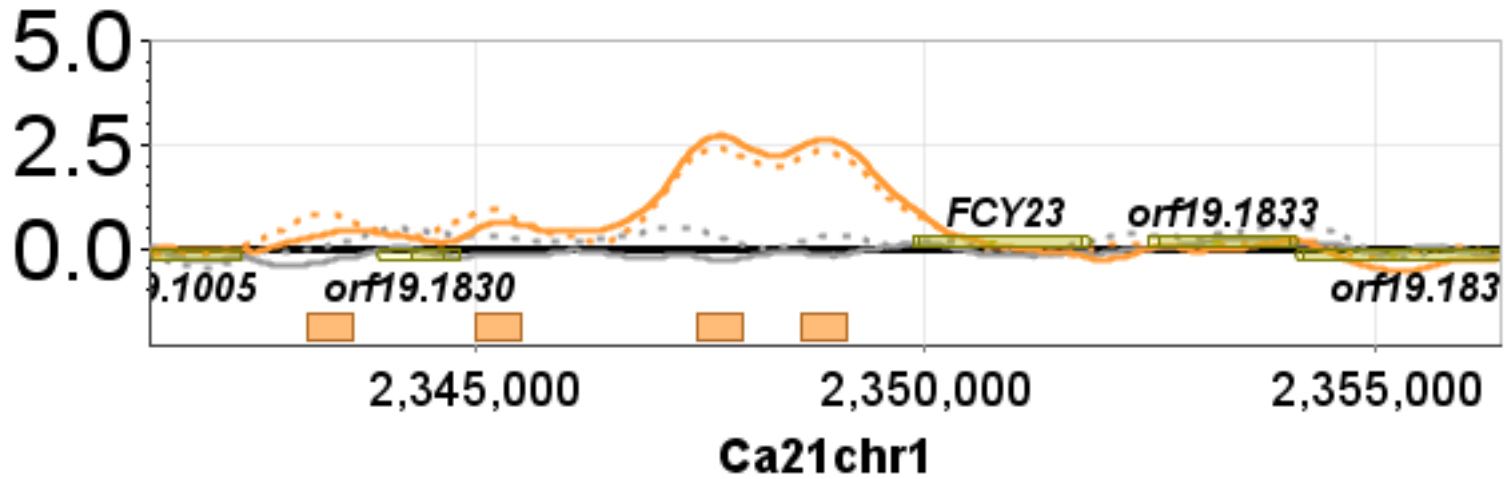

[2.588] Ca21chr4:462632-477631 [+] [PGA59, ntar\_757, ntar\_756, ntar\_755, ntar\_758]

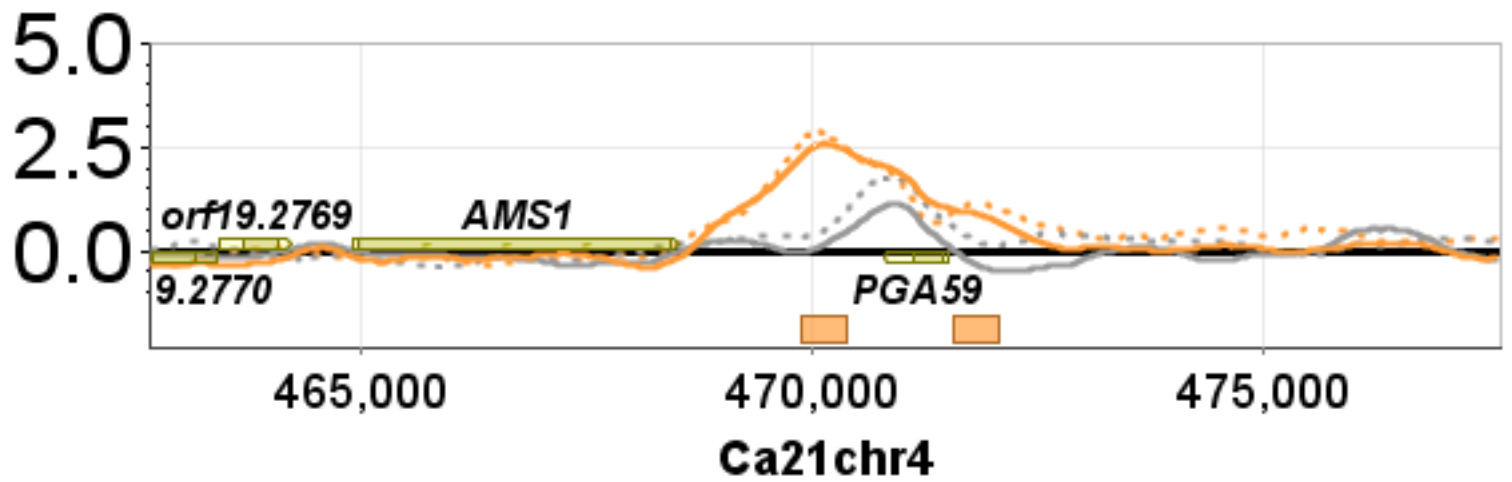

[2.565] Ca21chrR:1307687-1322686 [+] [orf19.3868, orf19.3869, ntar\_1302, ntar\_1301, ntar\_1300]

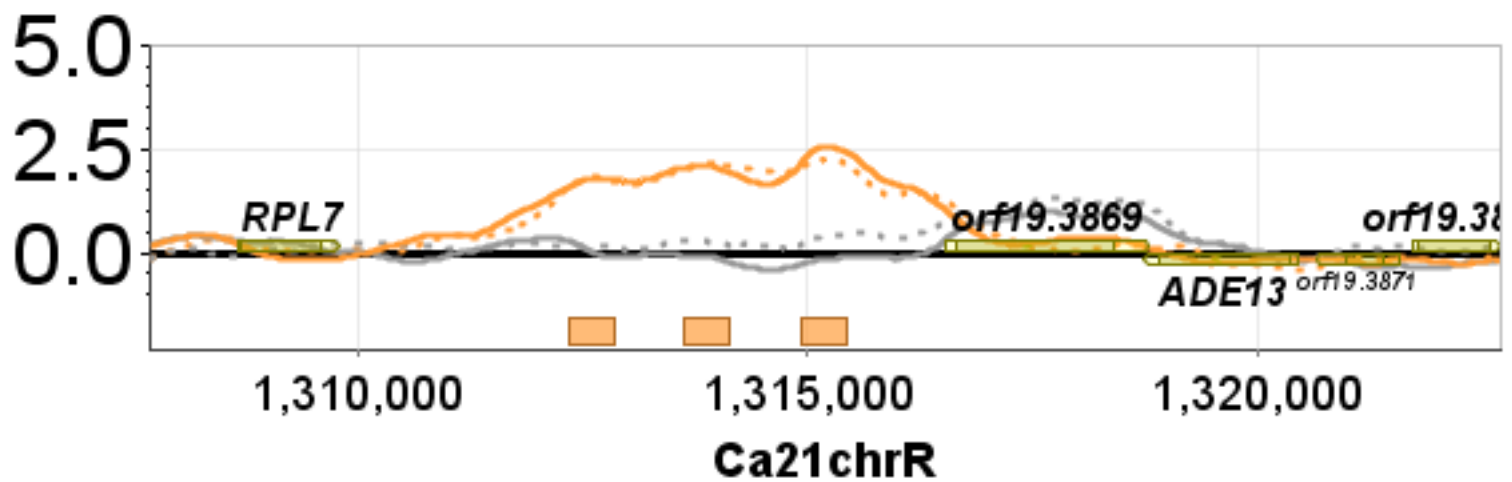

[2.556] Ca21chrR:27592-42591 [+] [orf19.7522, REP1, MKC1, POT1, orf19.7518]

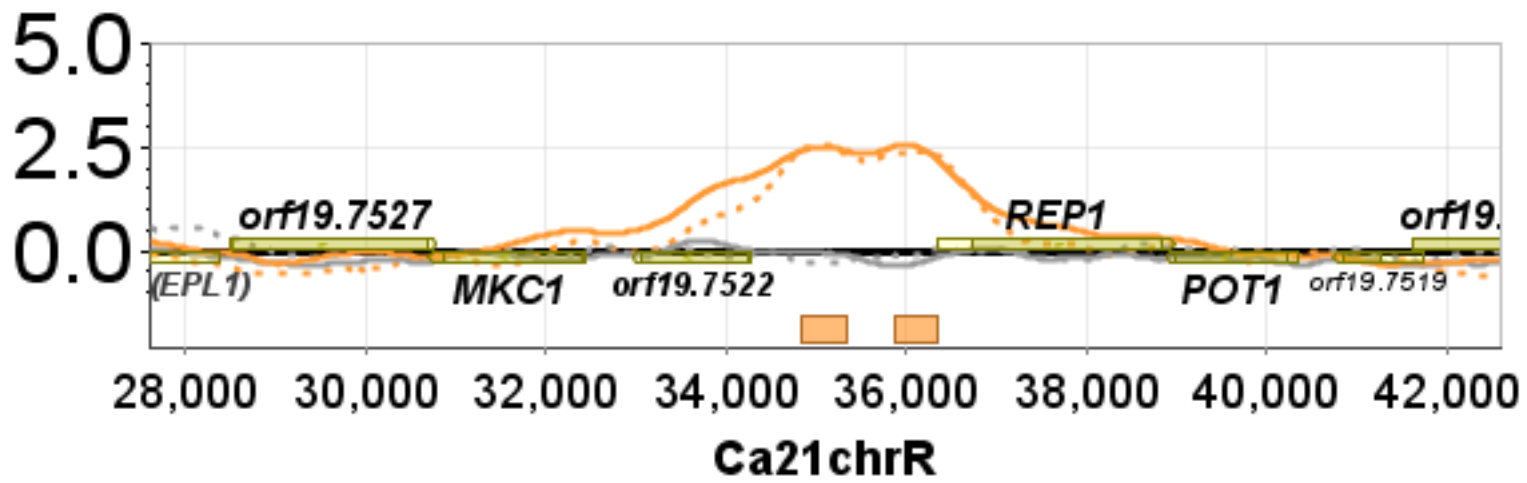

[2.554] Ca21chrR:1403673-1418672 [+] [ntar\_1310, RGS2, ntar\_1311, ntar\_1312, ntar\_1314]

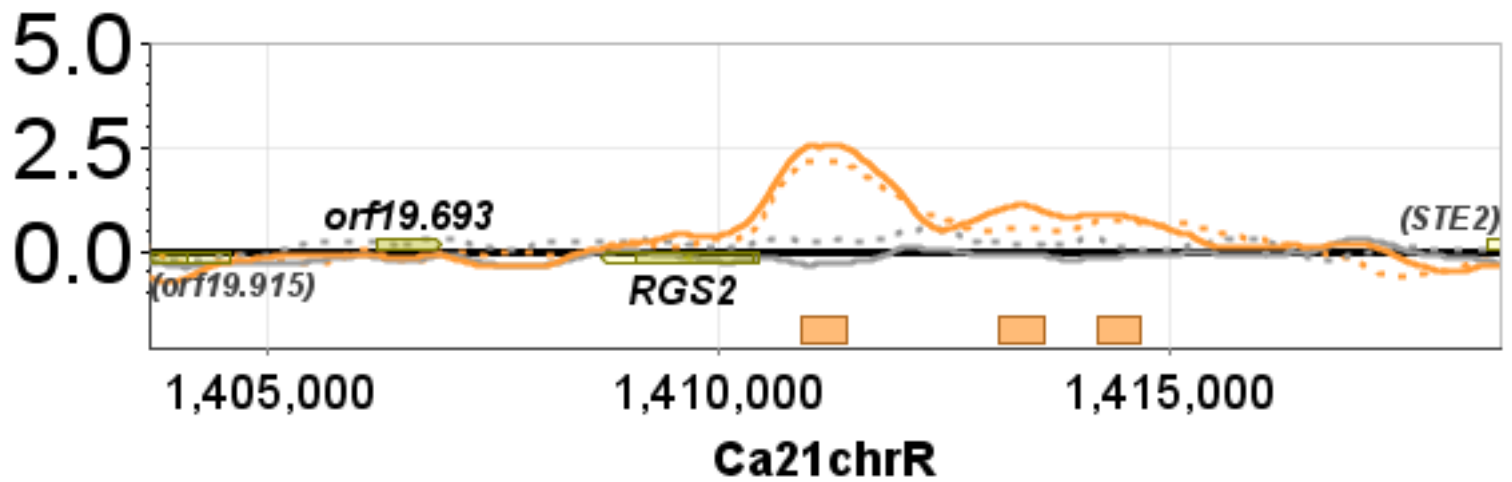

[2.546] Ca21chrR:28615-43614 [+] [REP1, orf19.7522, MKC1, POT1, orf19.7518]

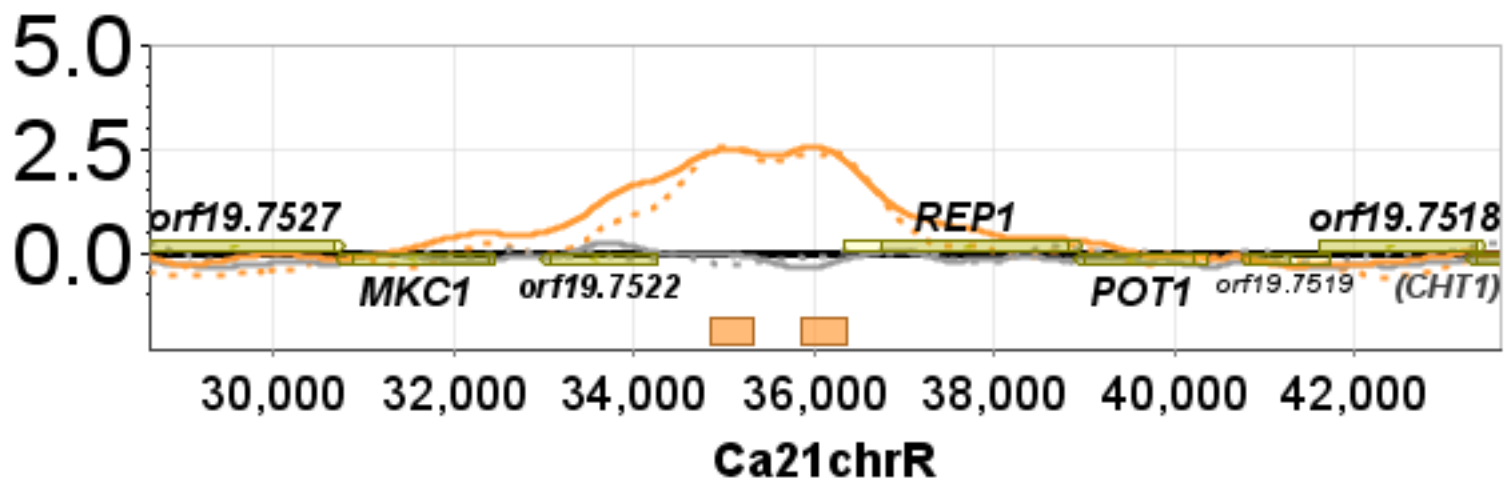

[2.541] Ca21chrR:591113-606112 [+] [RFG1, ntar\_1219]

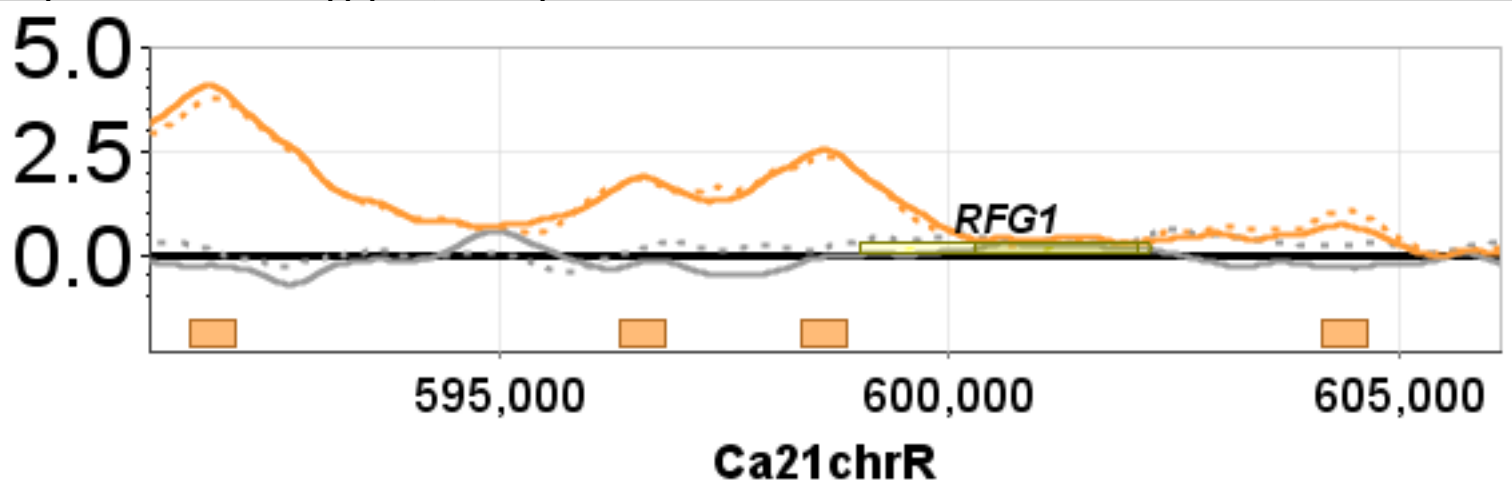

[2.54] Ca21chr1:1668749-1683748 [+] [VRG4, ADE4, ntar\_155, orf19.1229, ntar\_156]

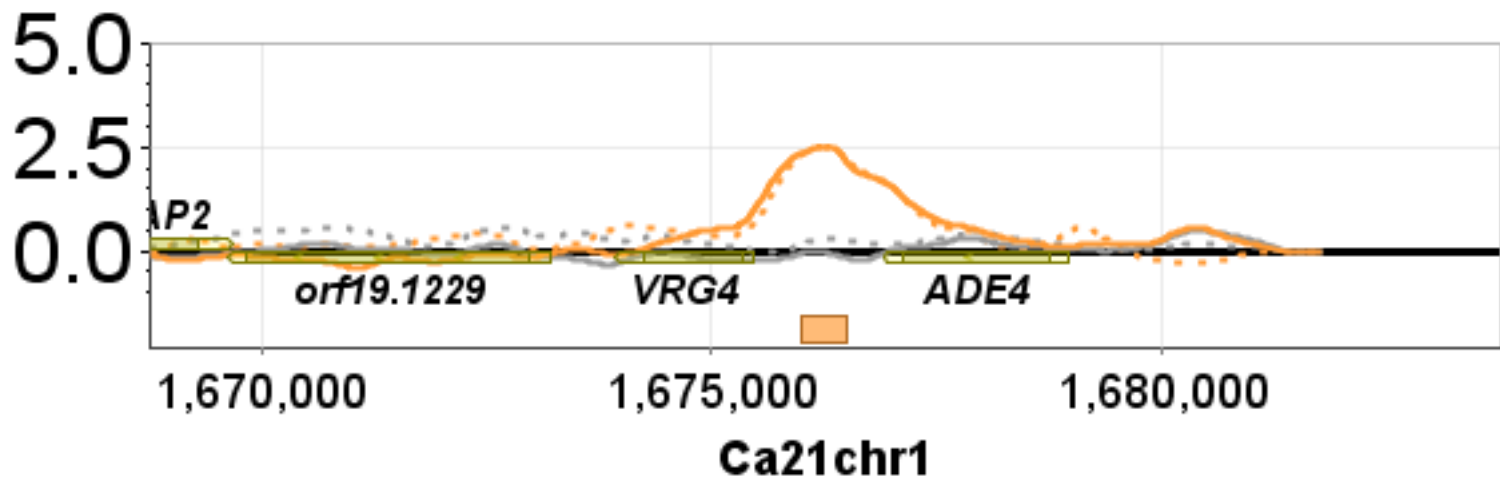

[2.533] Ca21chr3:1116085-1131084 [+] [ntar\_617, ntar\_616, ntar\_615, ntar\_614, ntar\_618]

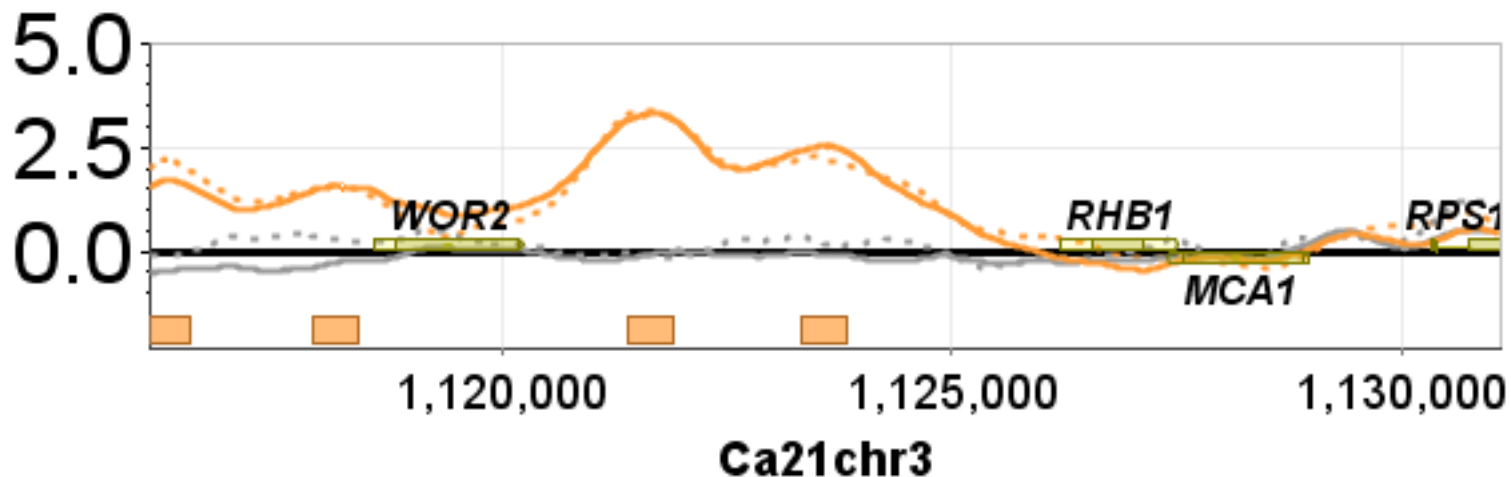

[2.52] Ca21chr4:1515831-1530830 [+] [CZF1, orf19.3128, CCT6, orf19.3125, orf19.3129]

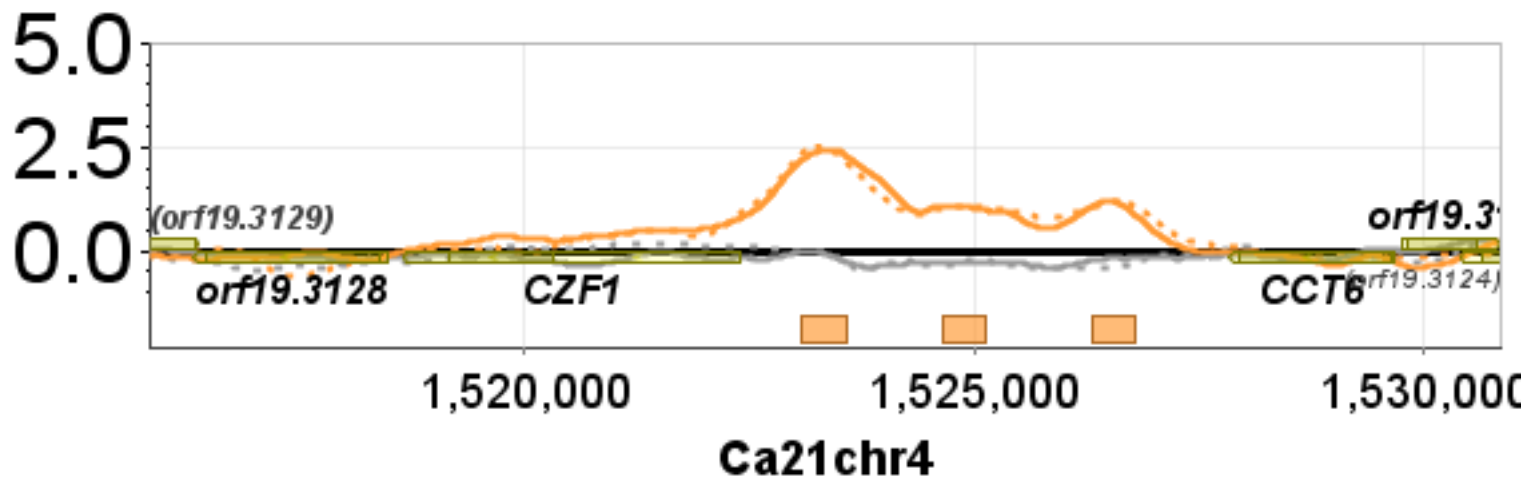

[2.518] Ca21chr1:2933554-2948553 [+] [orf19.4972, HYR1, orf19.4970]

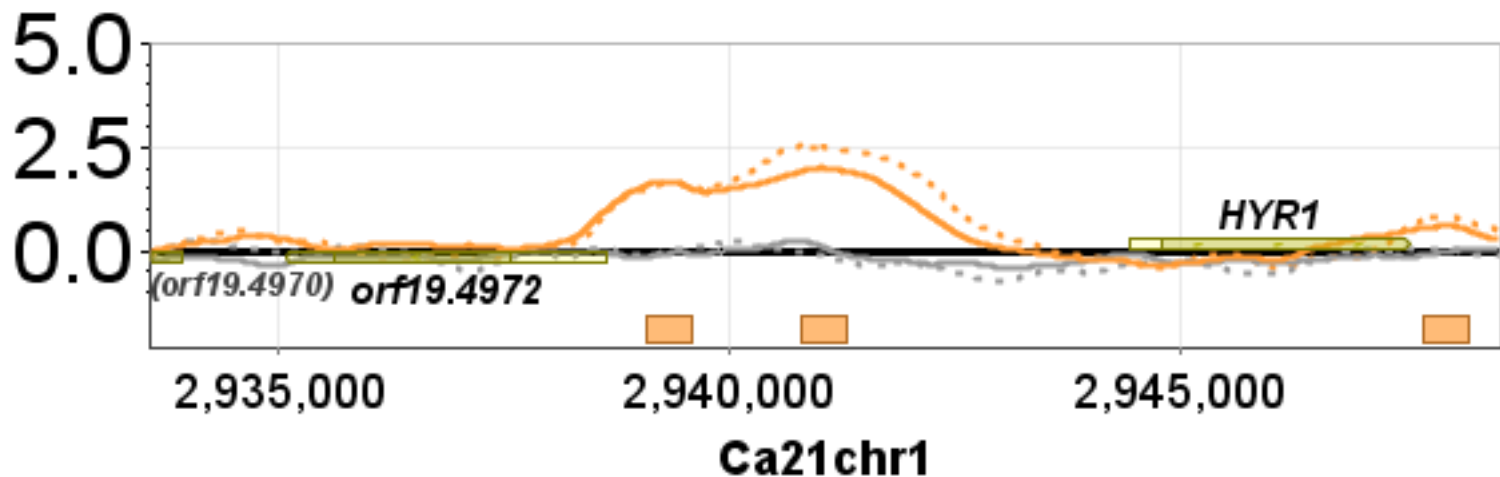

[2.504] Ca21chr5:763219-778218 [+] [te(uuc)5, orf19.2638, orf19.2639, orf19.2639.1, FUR1]

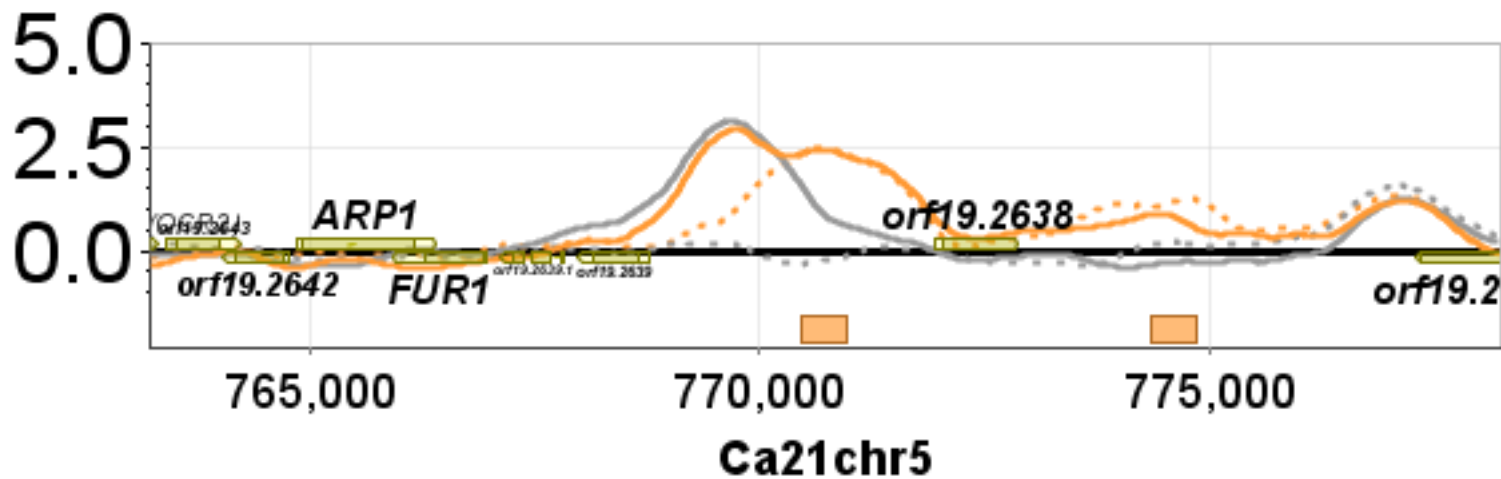

[2.485] Ca21chr6:661075-676074 [+] [MDR1, ntar\_1017, BMT6, orf19.5605, orf19.5606]

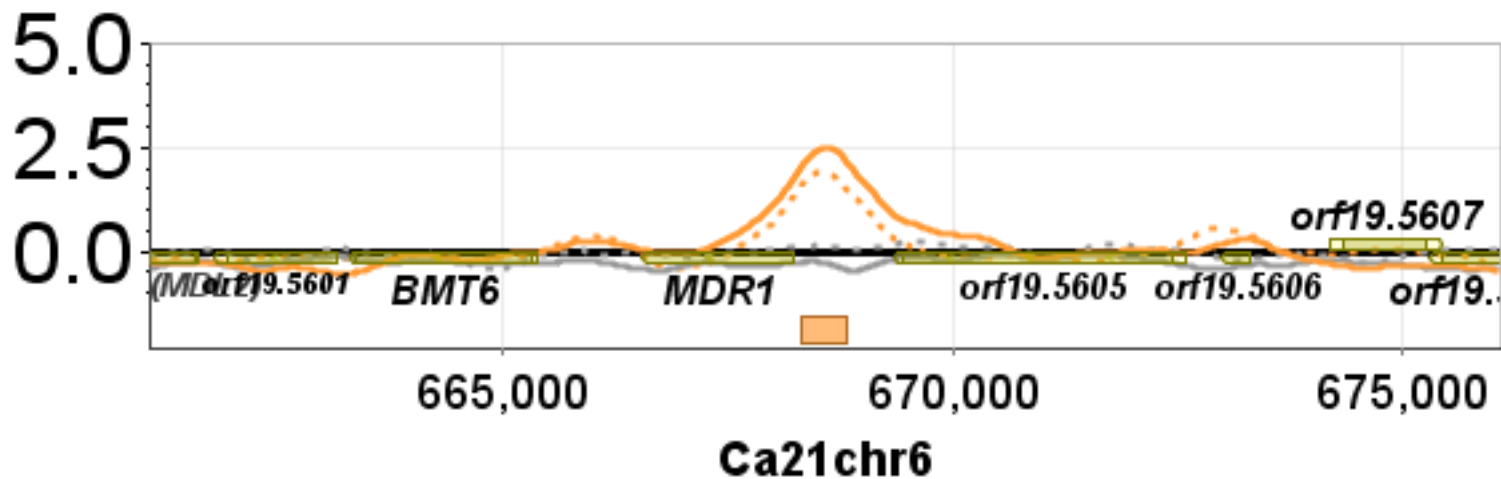

[2.478] Ca21chr4:856545-871544 [+] [JEN2, orf19.5308, orf19.5306, RHD3, orf19.5304]

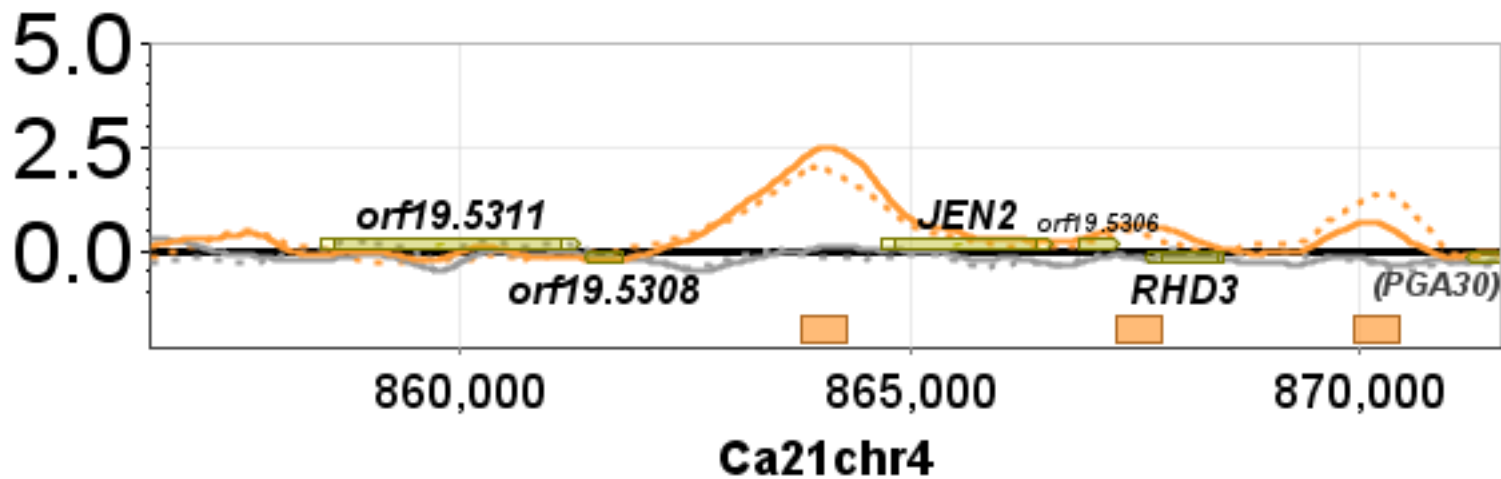

[2.461] Ca21chr4:270107-285106 [+] [ntar\_734, PGA53, ntar\_733, ntar\_735, orf19.4652]

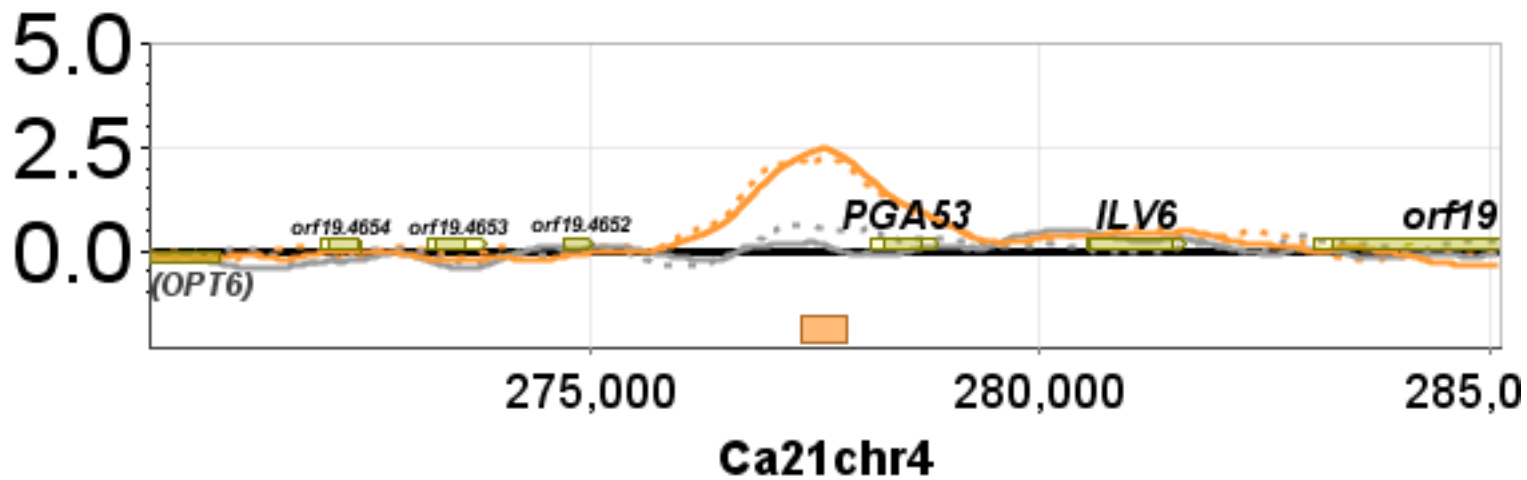

[2.455] Ca21chr3:1751202-1766201 [+] [orf19.6715, ntar\_688, orf19.6713, ABD1, orf19.6718]

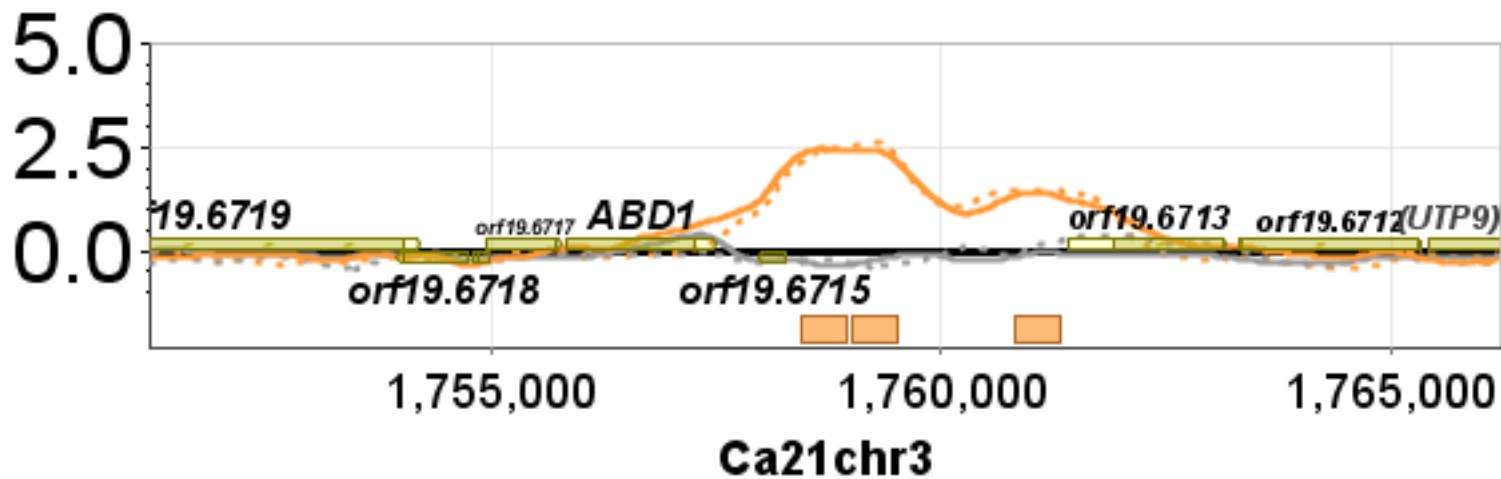

[2.406] Ca21chr1:2226232-2241231 [+] [MIR1, WOR1, orf19.4886, ECM21]

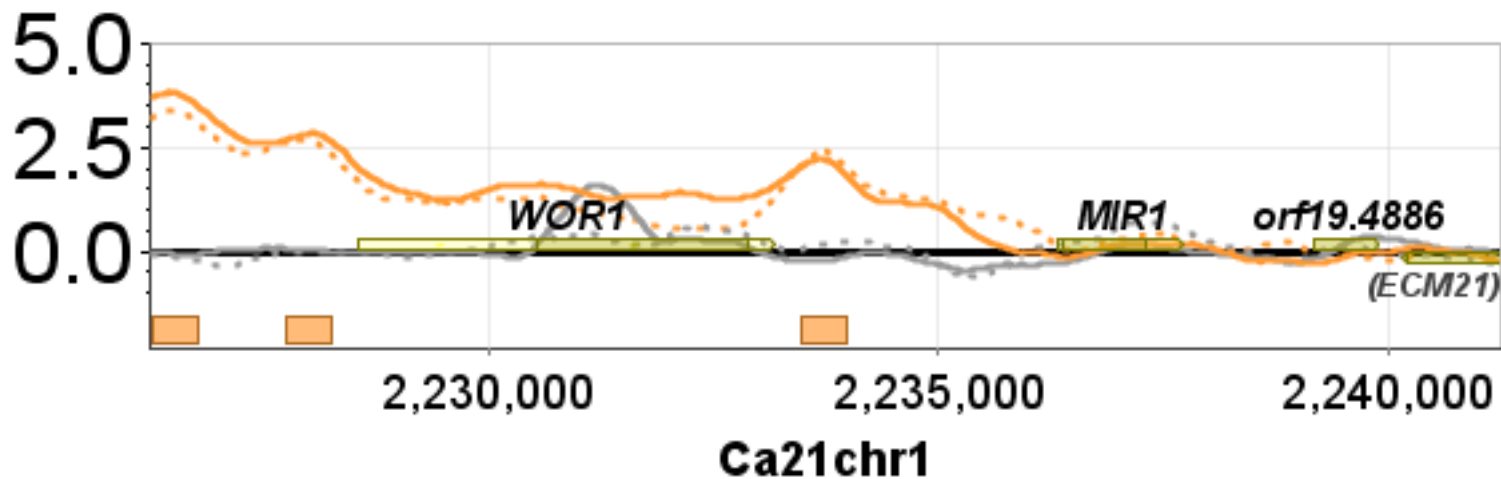

[2.402] Ca21chrR:1710499-1725498 [+] [ntar\_1351, ntar\_1353, ntar\_1352, tg(gcc)1, EFG1]

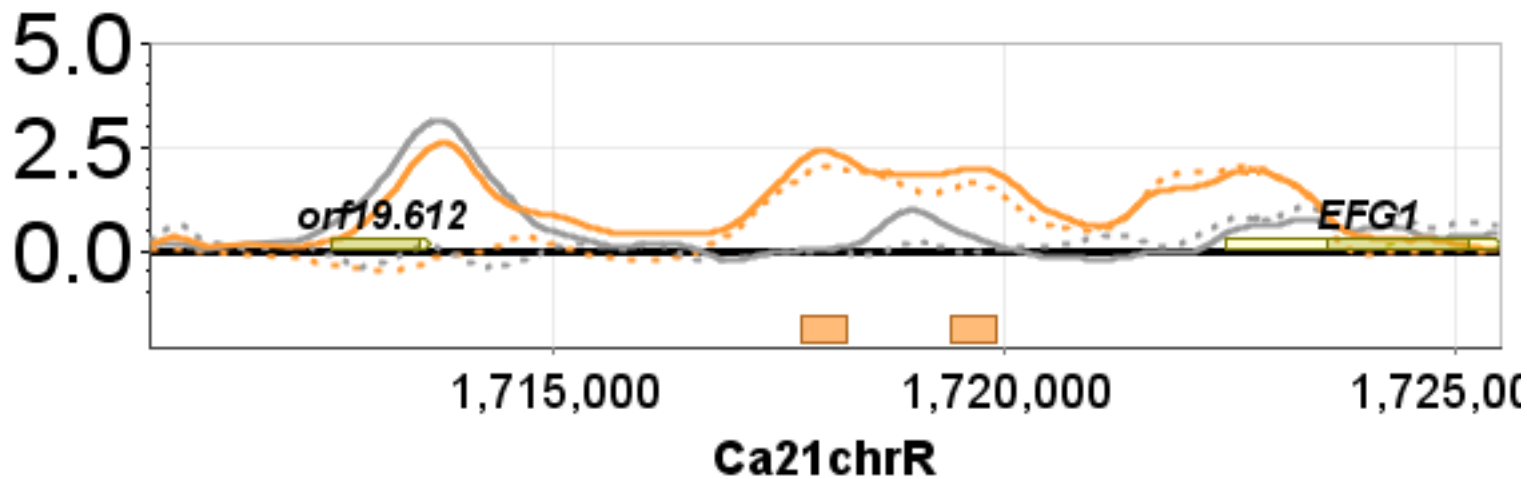

[2.324] Ca21chr3:1467593-1482592 [+] [ntar\_658, ntar\_659, AAF1, ECM15, th(gug)3]

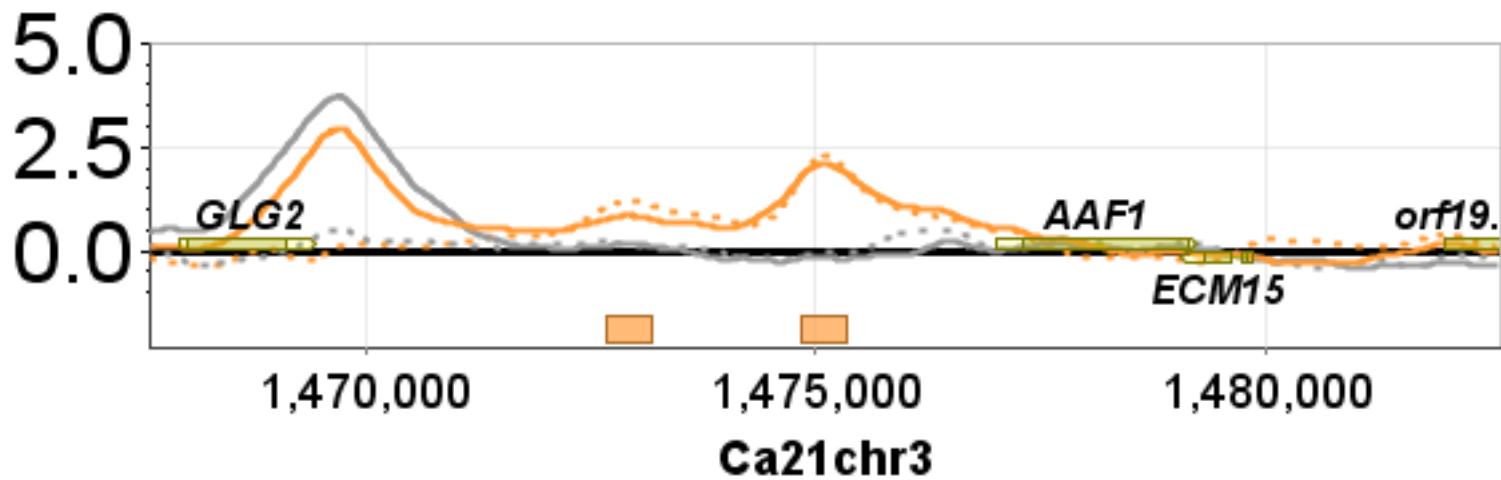

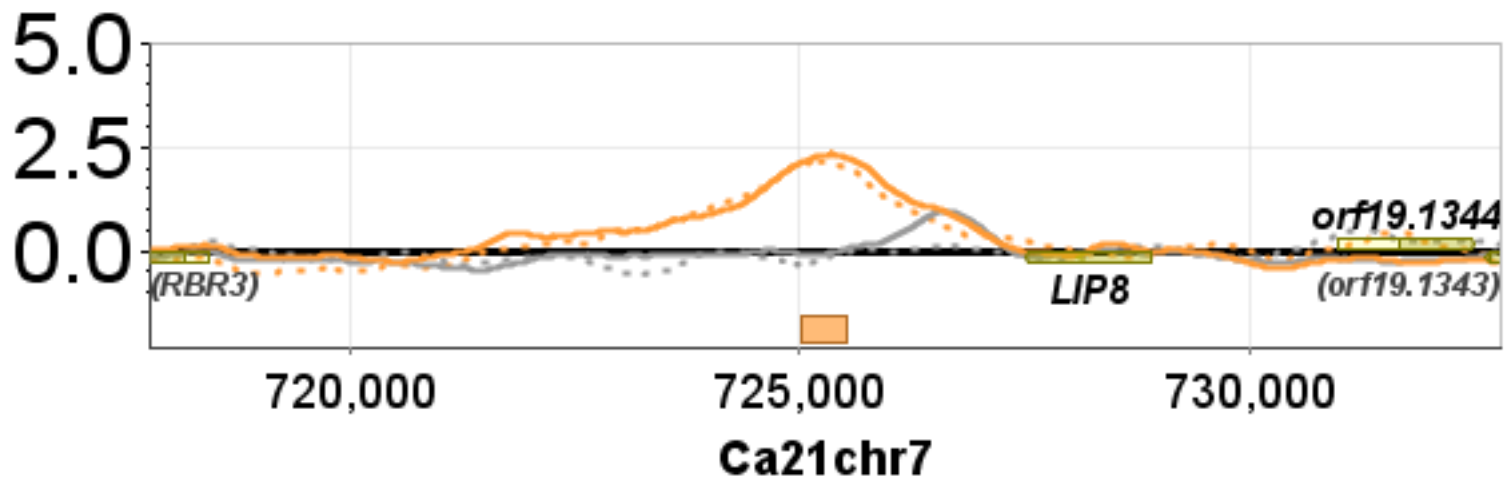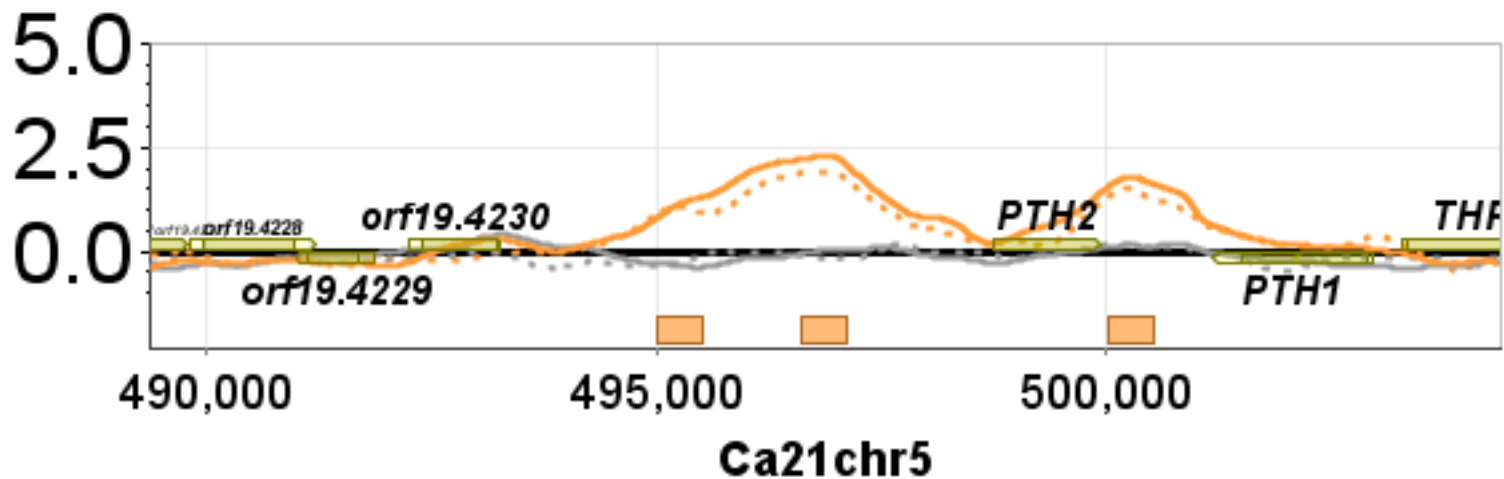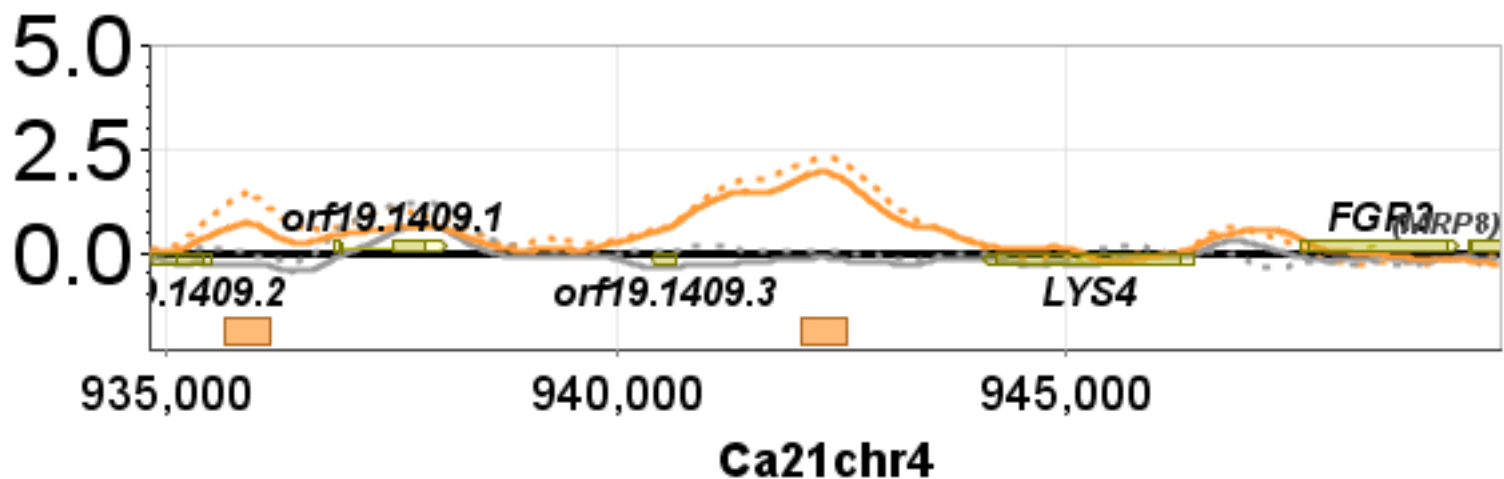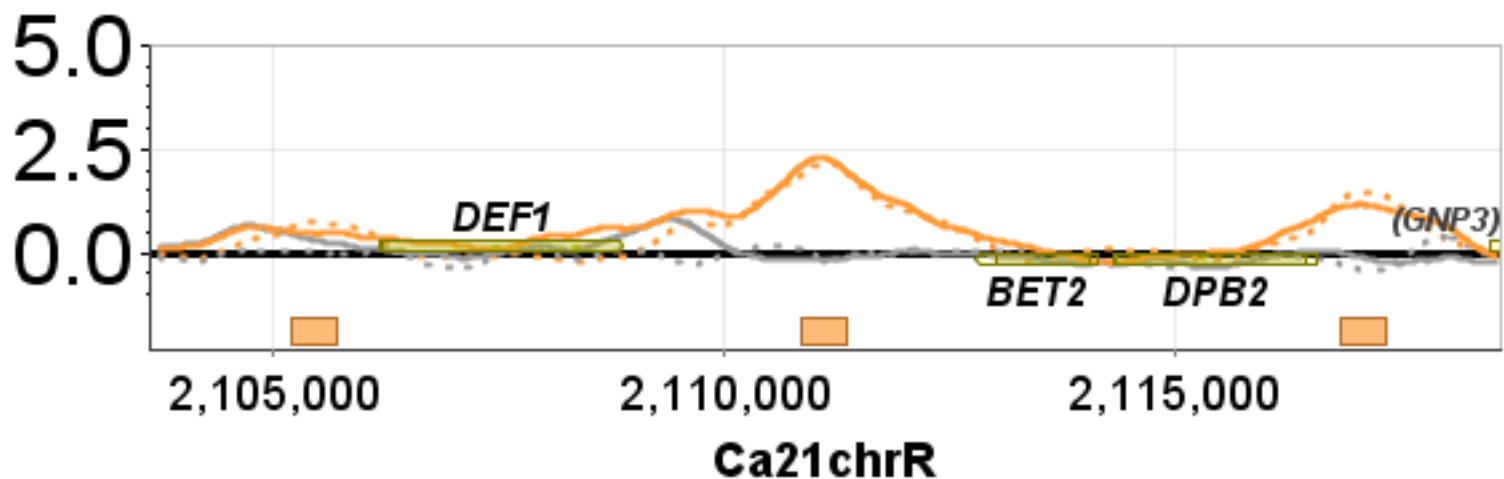

[2.3] Ca21chrR:579559-594558 [+] [orf19.2822, orf19.2821, orf19.2820, orf19.2818, orf19.2819]

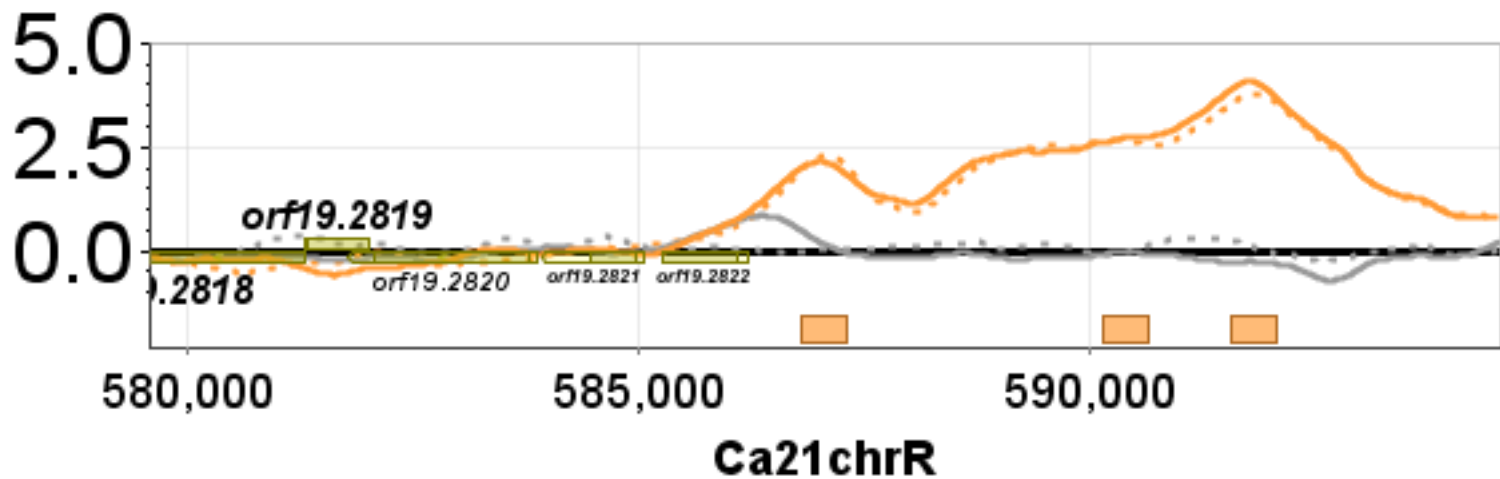

[2.261] Ca21chr5:108657-123656 [+] [AGA1, orf19.934, orf19.933]

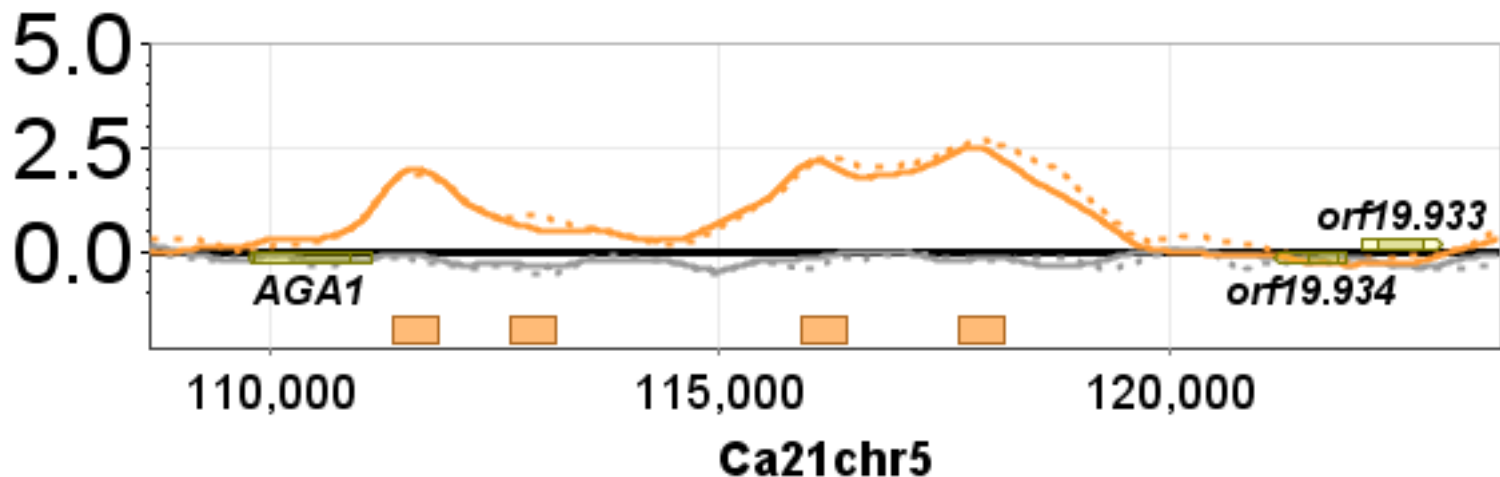

[2.234] Ca21chr1:1218177-1233176 [+] [orf19.2459, orf19.2460, PRN4, orf19.2458, PRN3]

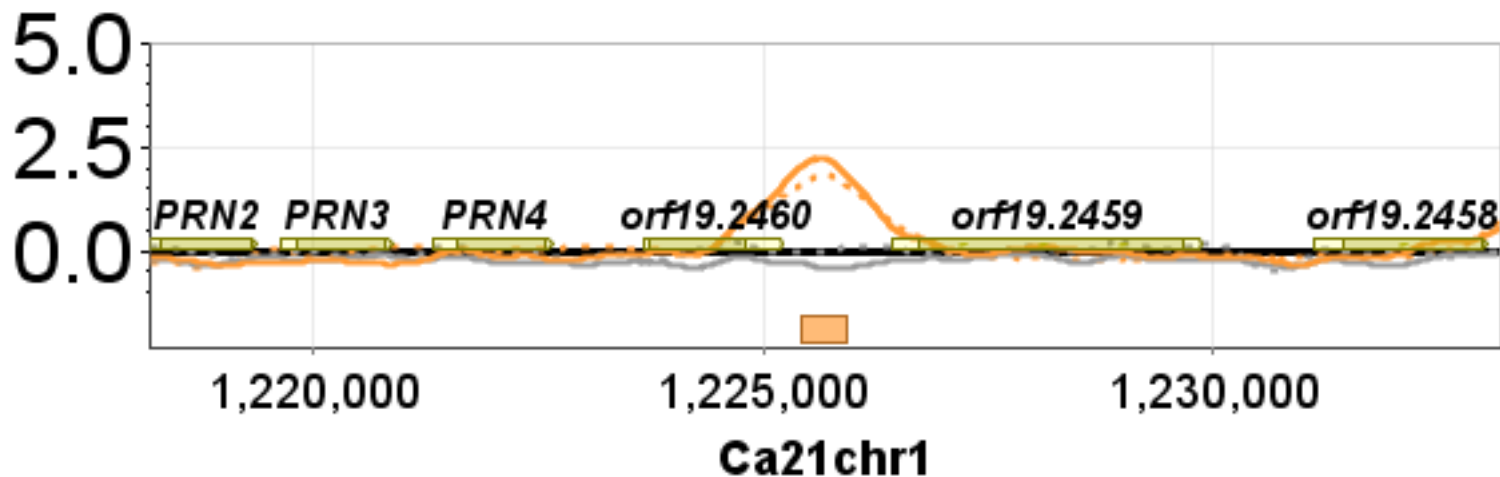

[2.214] Ca21chrR:437365-452364 [+] [OPT1, orf19.2604, orf19.2605, HEM1, HDA1]

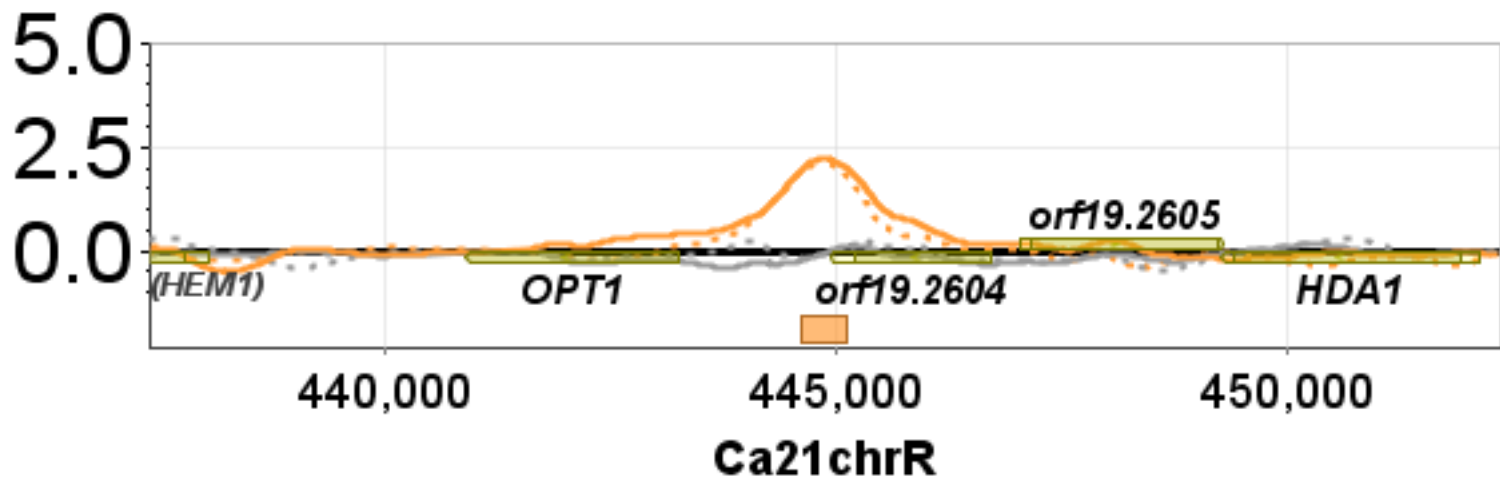



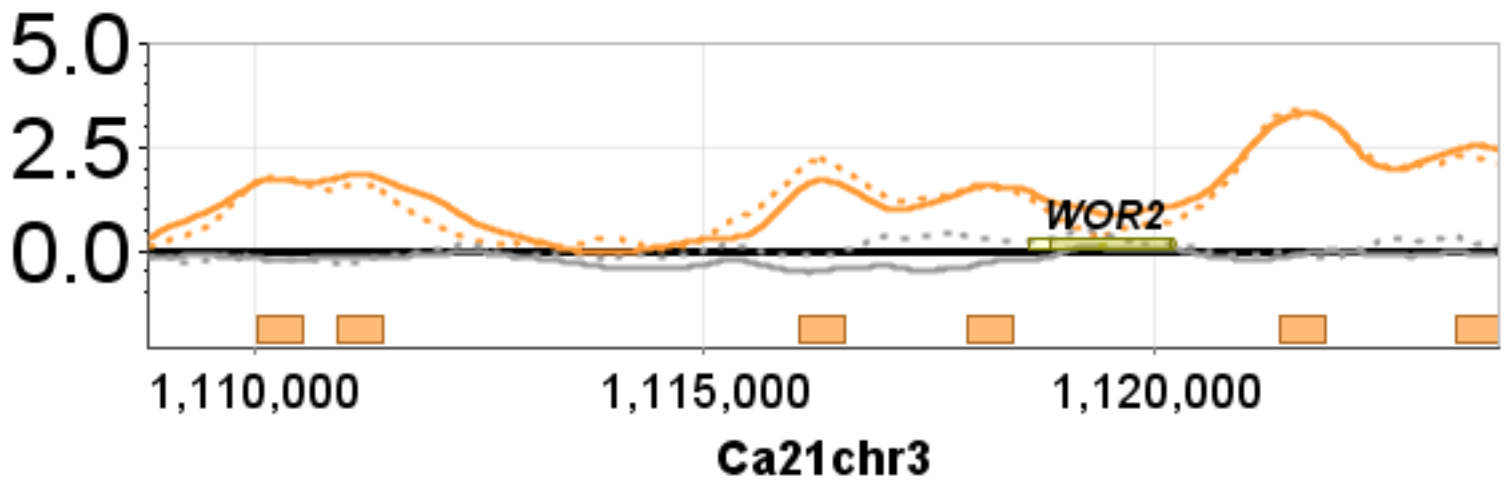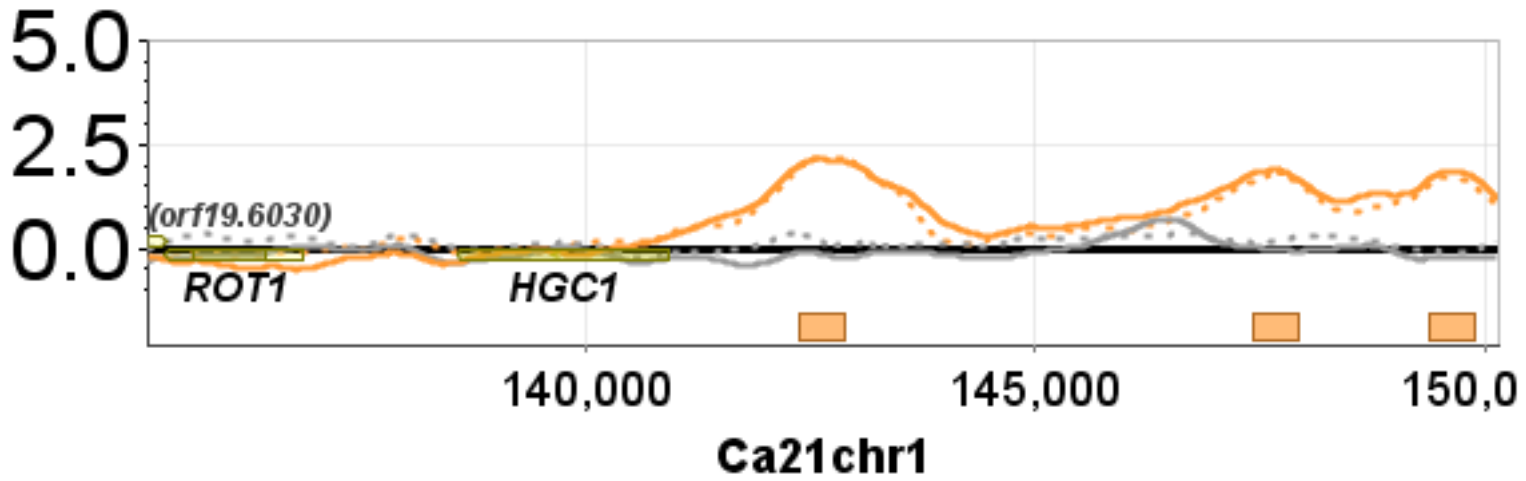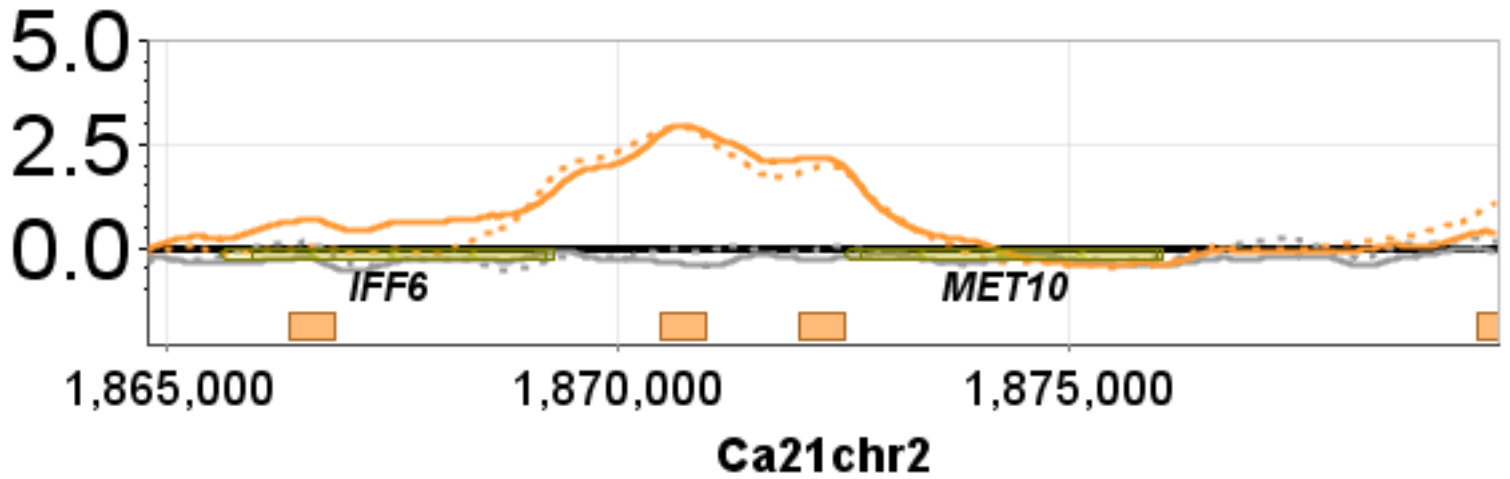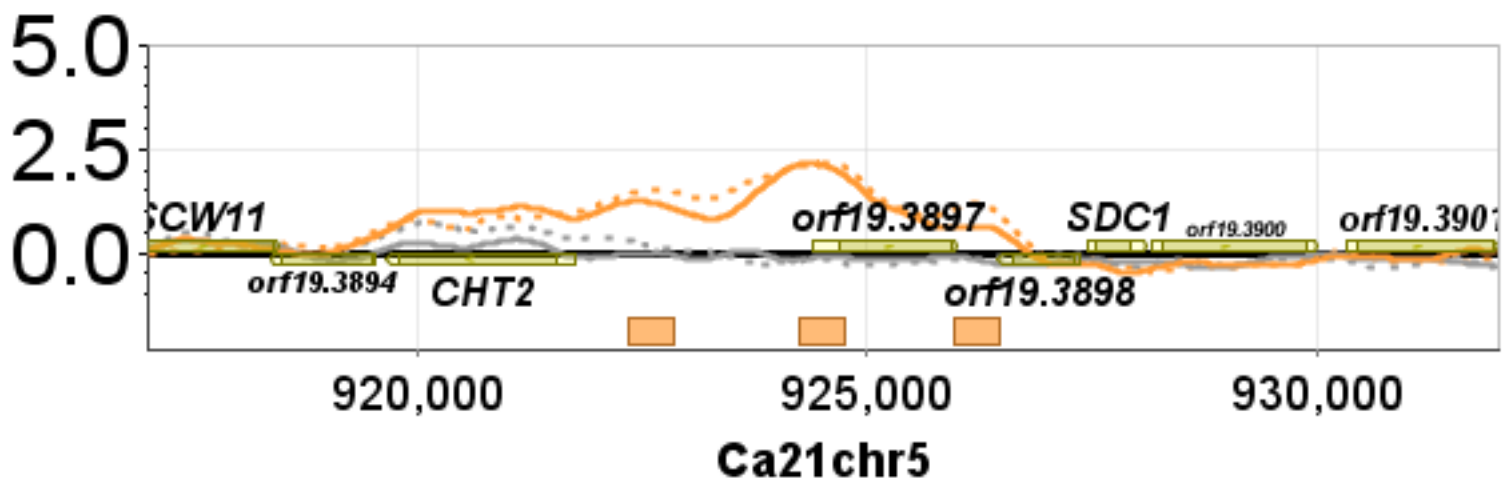

[2.175] Ca21chrR:1306385-1321384 [+] [ntar\_1302, orf19.3868, orf19.3869, ntar\_1301, ntar\_1300]

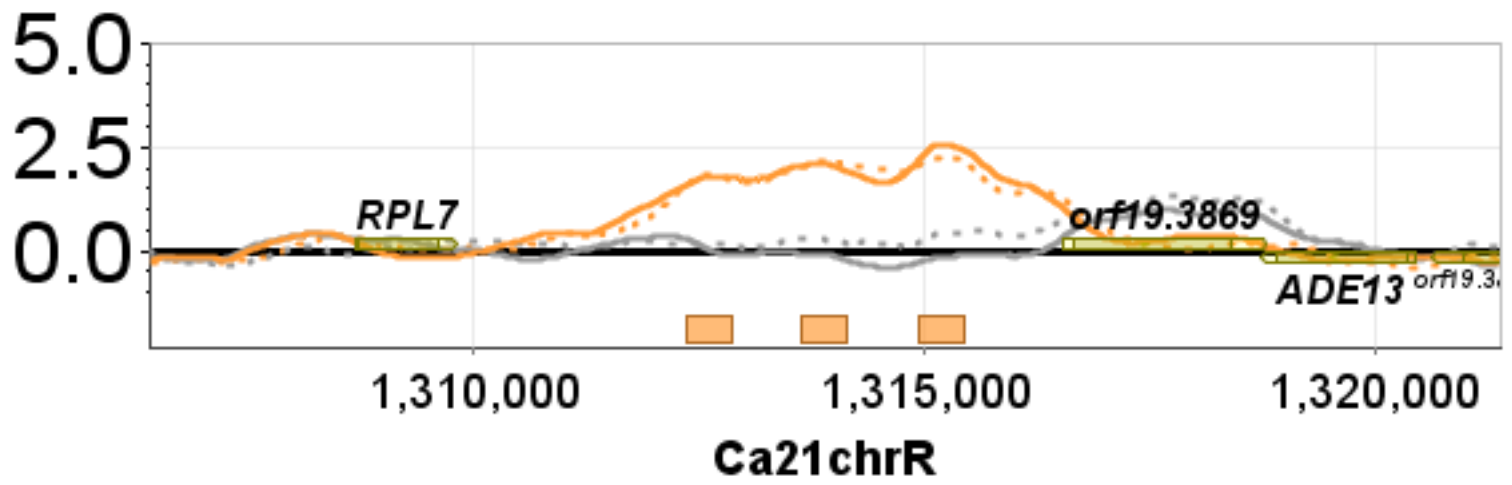

[2.168] Ca21chr5:888080-903079 [+] [orf19.1286, ntar\_940, orf19.1285, orf19.1287, ntar\_939]

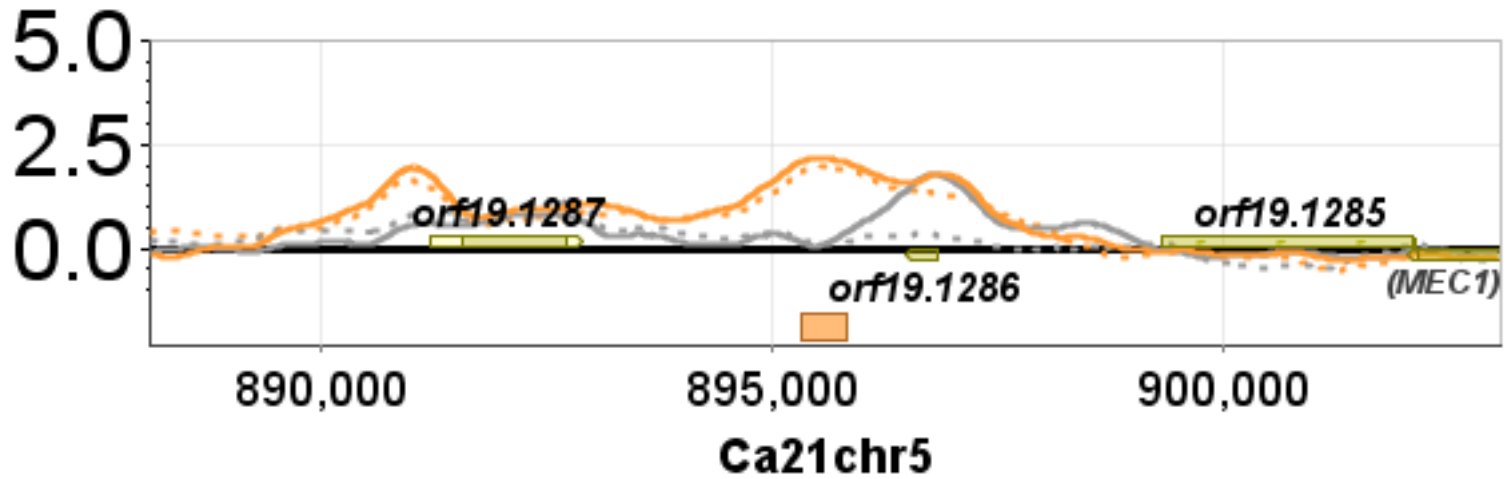

[2.15] Ca21chrR:772513-787512 [+] [orf19.4394, CIT1, orf19.4395, orf19.4396, ntar\_1246]

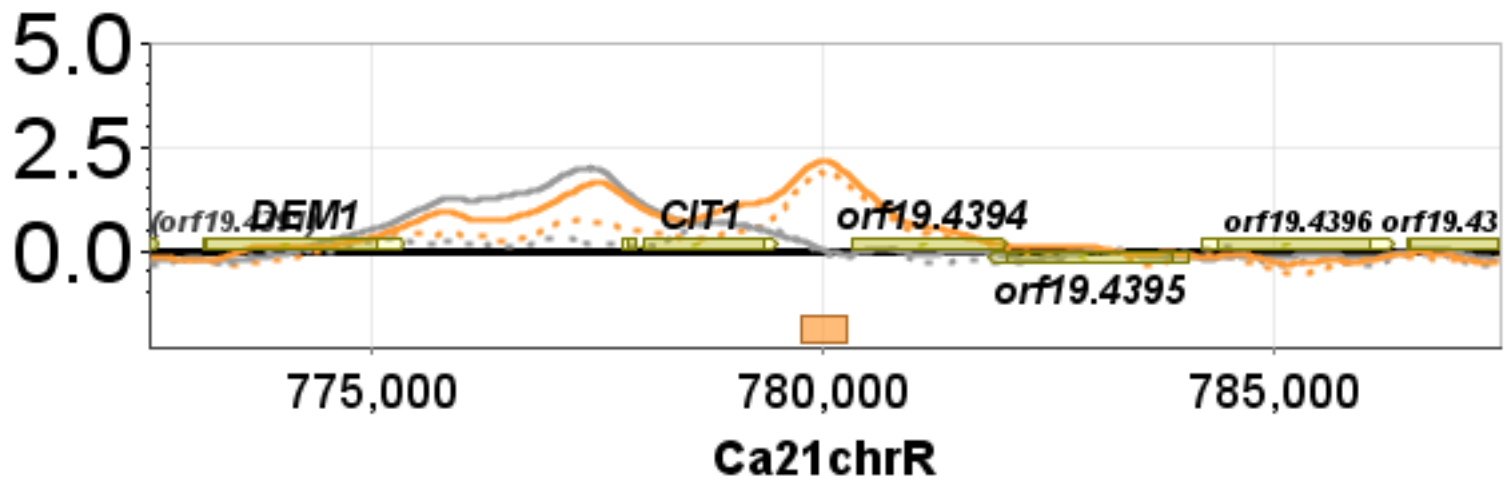

[2.142] Ca21chr1:286603-301602 [+] [orf19.3336, orf19.3335, ntar\_28, RPS21, orf19.3337]

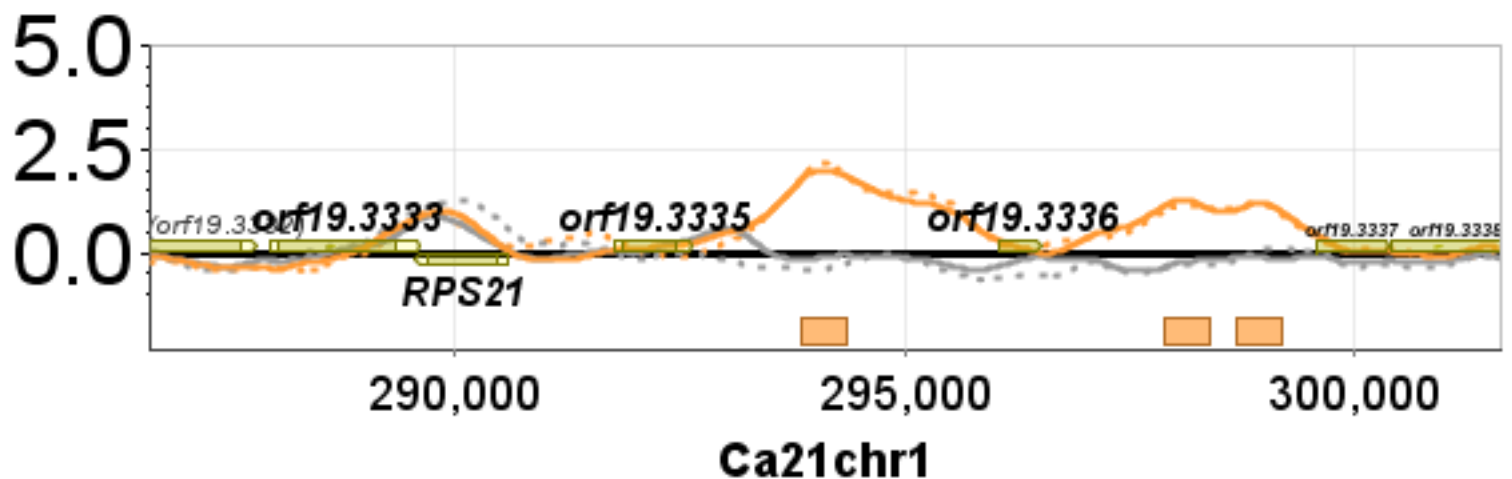

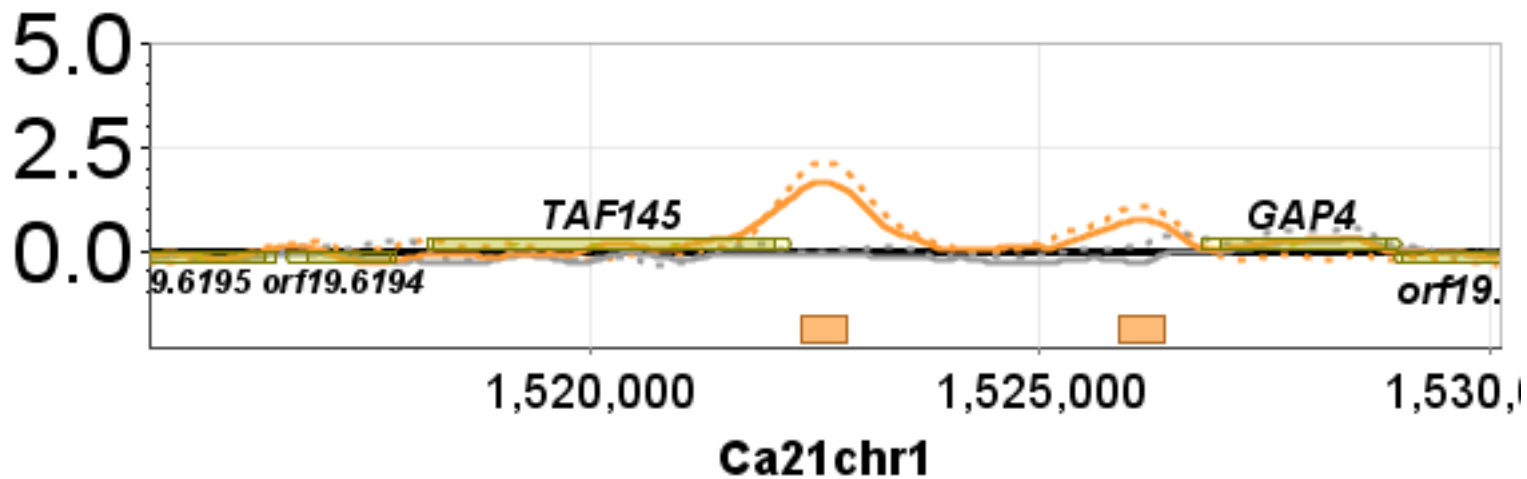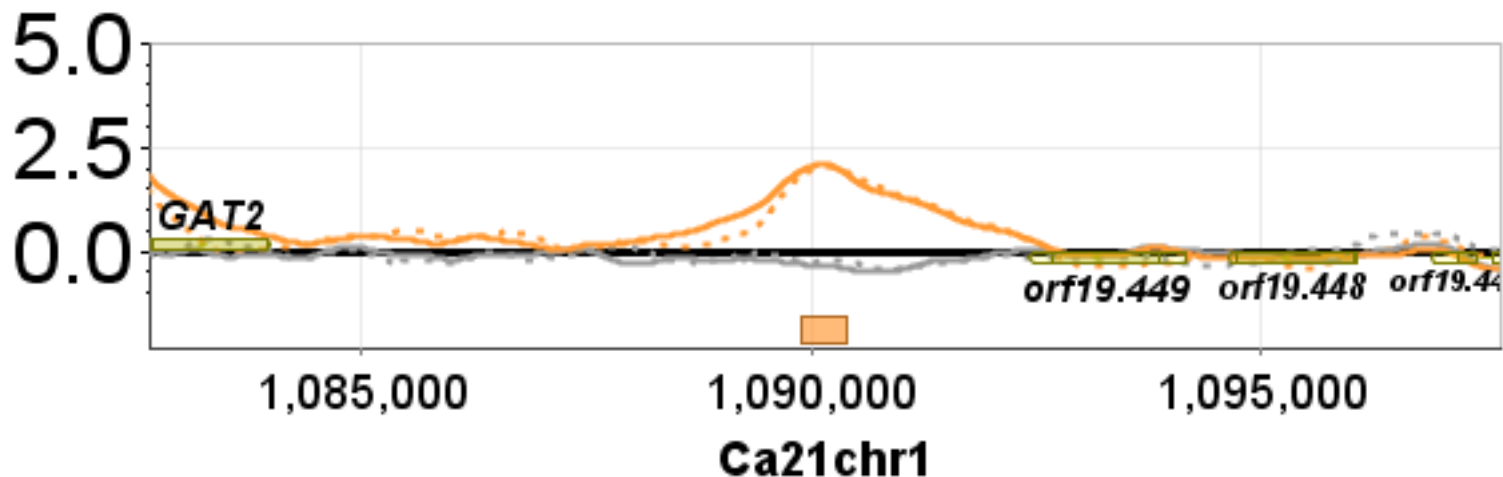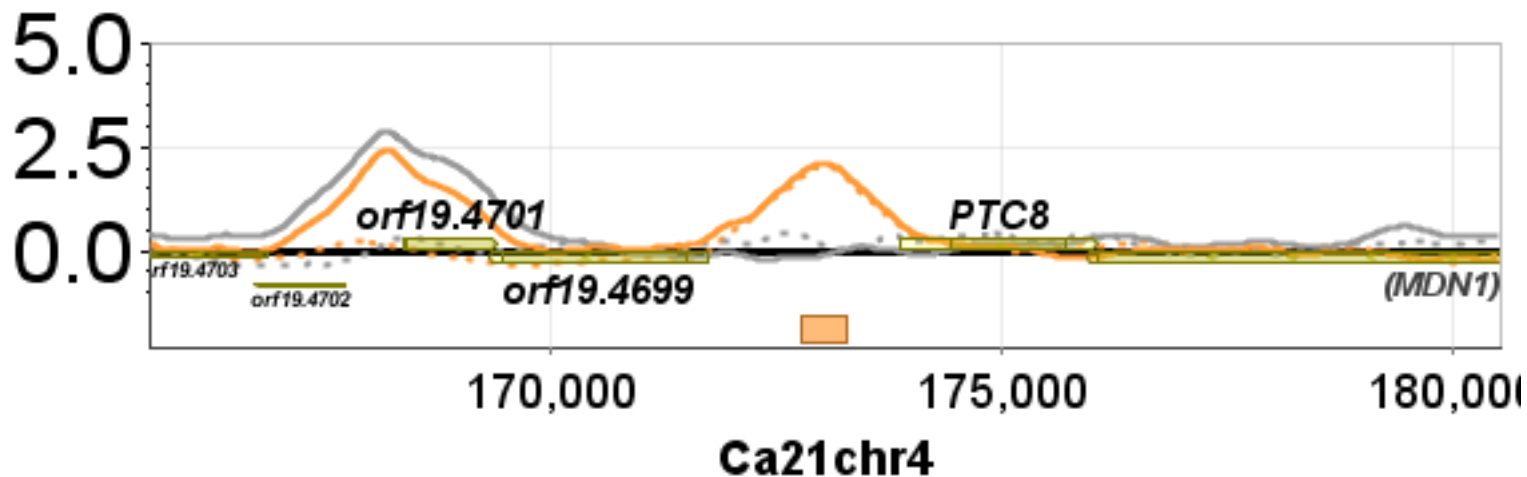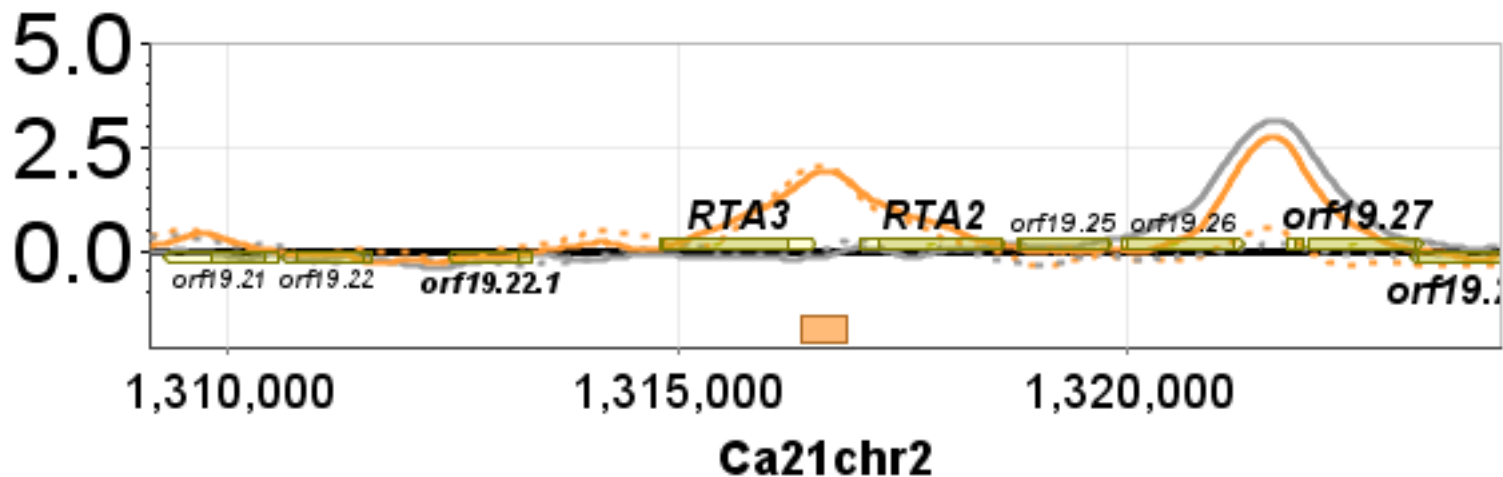

[2.037] Ca21chr2:1796258-1811257 [+] [PIR1, BUD20, orf19.217, orf19.223, orf19.225]

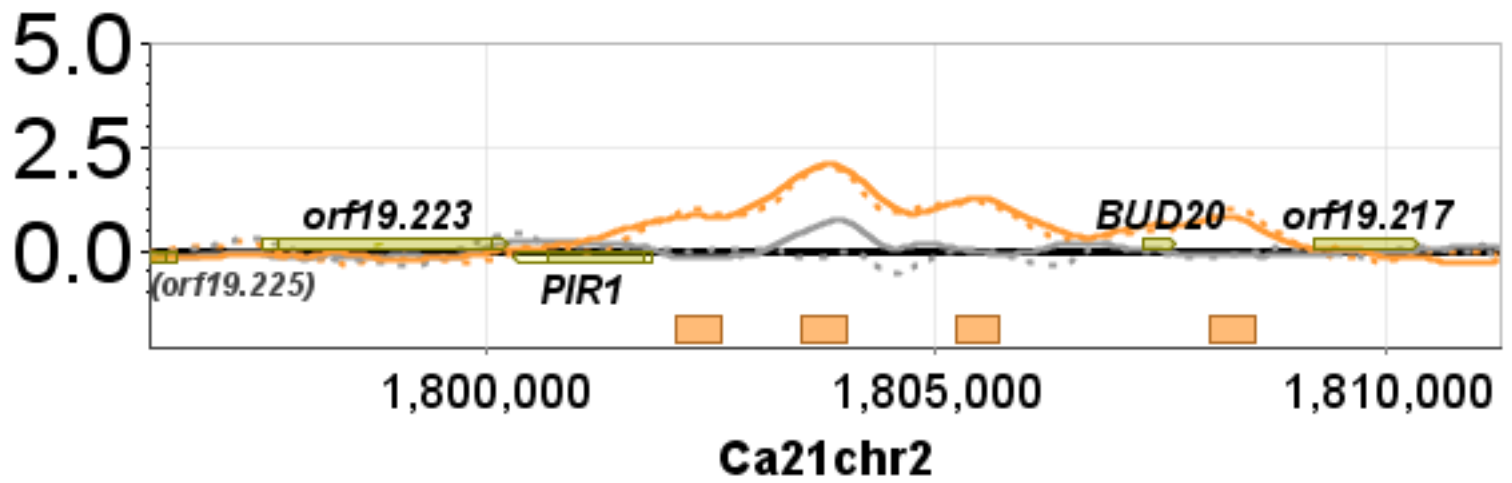

[2.027] Ca21chr2:1738959-1753958 [+] [YWP1, ntar\_452, ntar\_451, ntar\_449, ntar\_450]

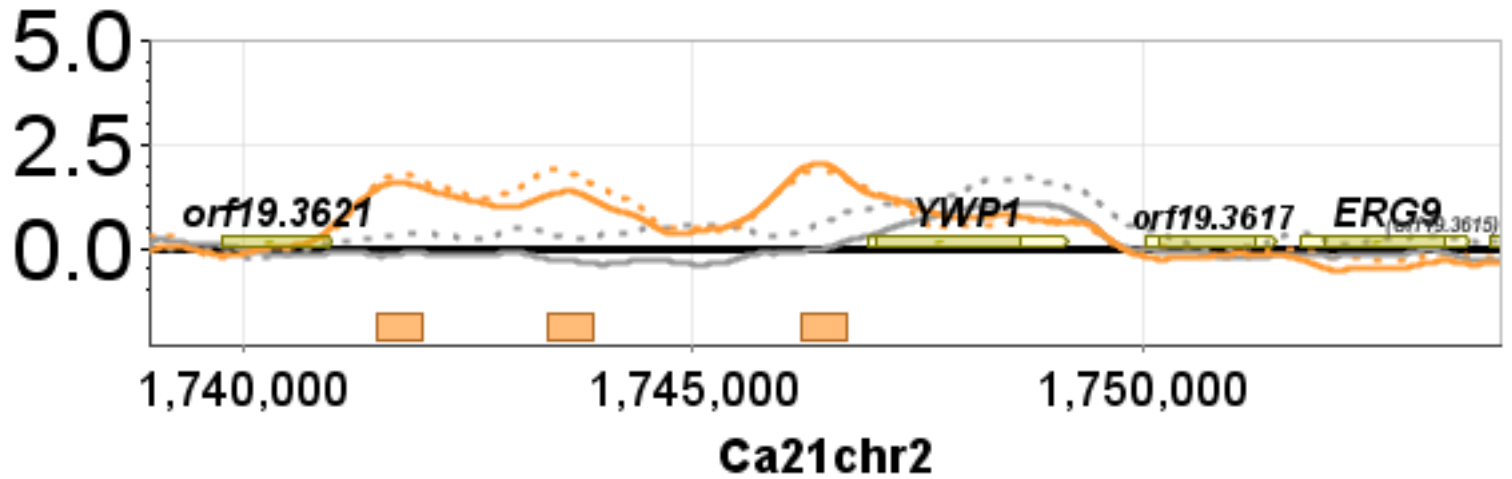

[2.022] Ca21chr1:2513489-2528488 [+] [PHO84, DPP1, ntar\_240, ntar\_241, ntar\_239]

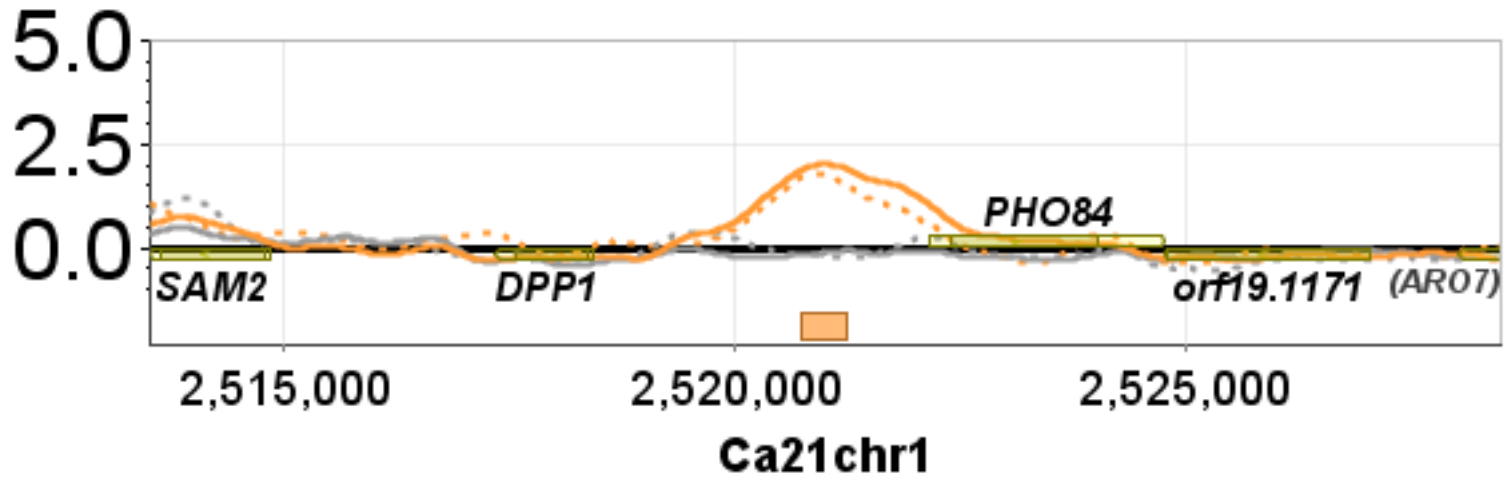

[2.019] Ca21chr2:926453-941452 [+] [ntar\_369, ADH3, LYS22, ntar\_368, ntar\_370]

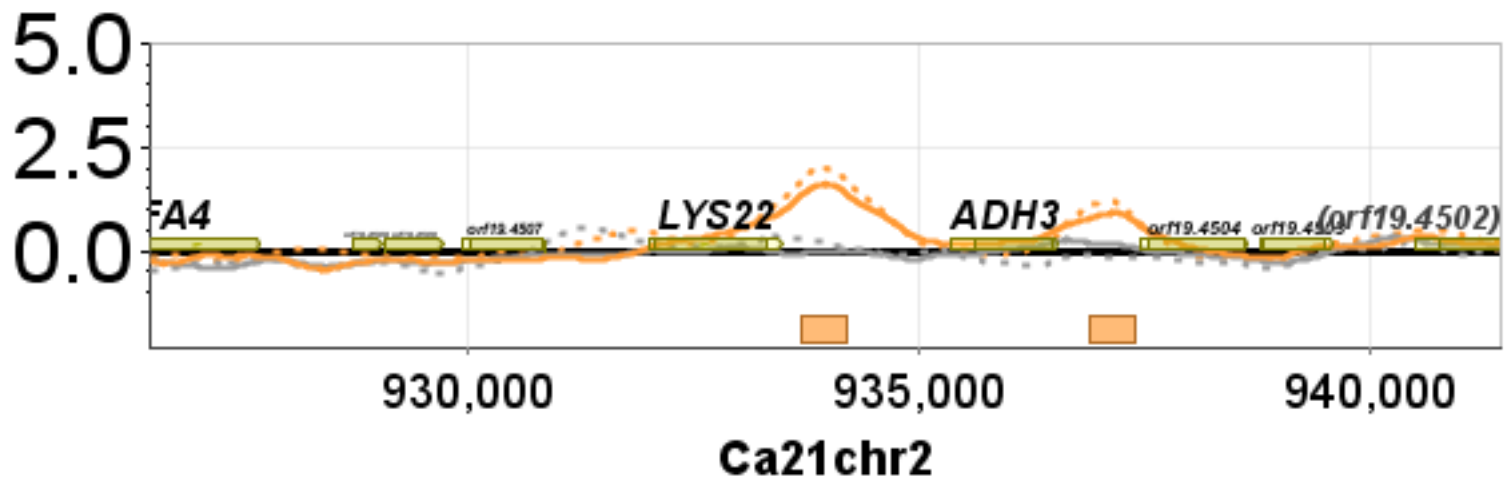

[2.015] Ca21chr5:239790-254789 [+] [CLN3, ntar\_865, ntar\_864, orf19.1959, orf19.1958]

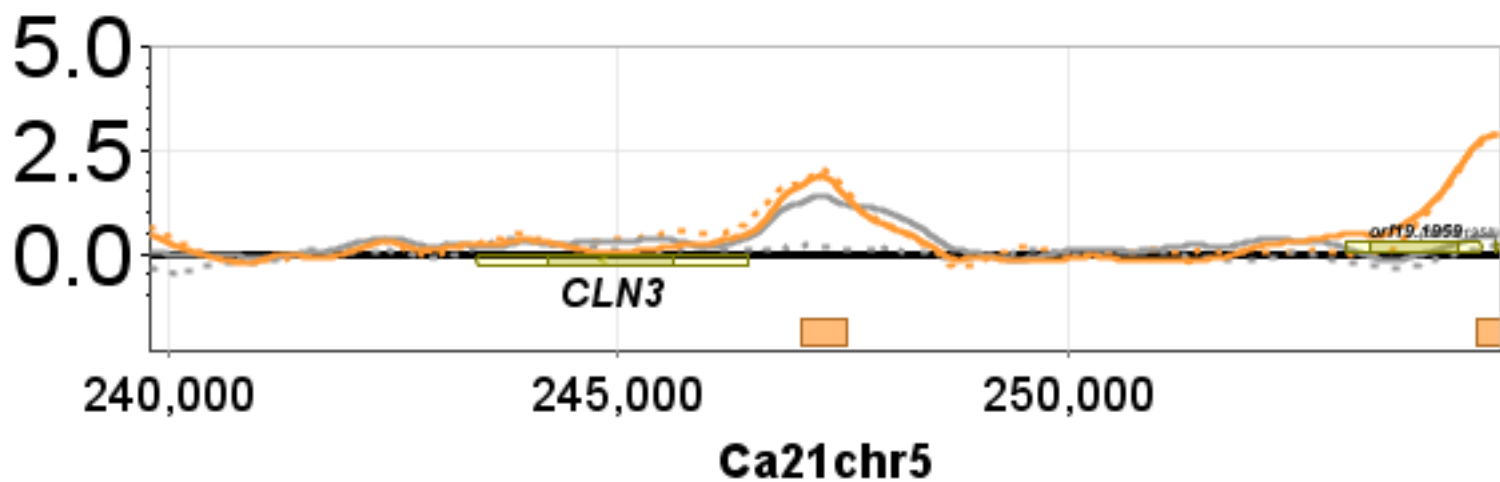

[2.005] Ca21chrR:623904-638903 [+] [PGA34, ntar\_1229, ntar\_1230, ntar\_1231, RPD3]

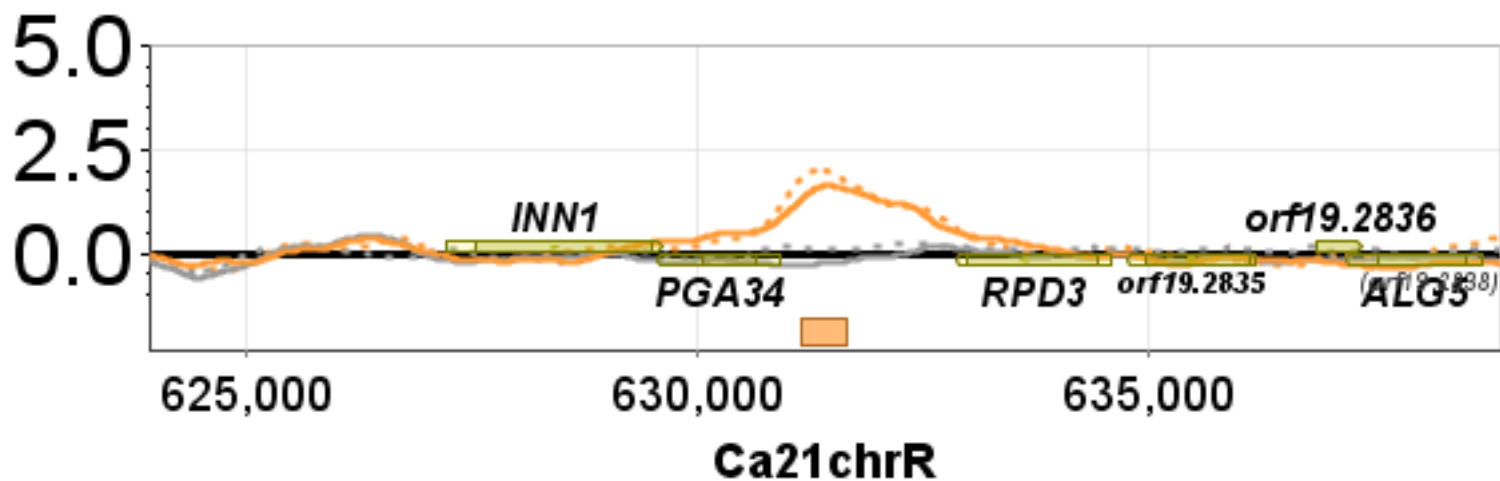

[1.995] Ca21chr2:1569299-1584298 [+] [YVC1, orf19.2210, orf19.2208, orf19.2211, orf19.2212]

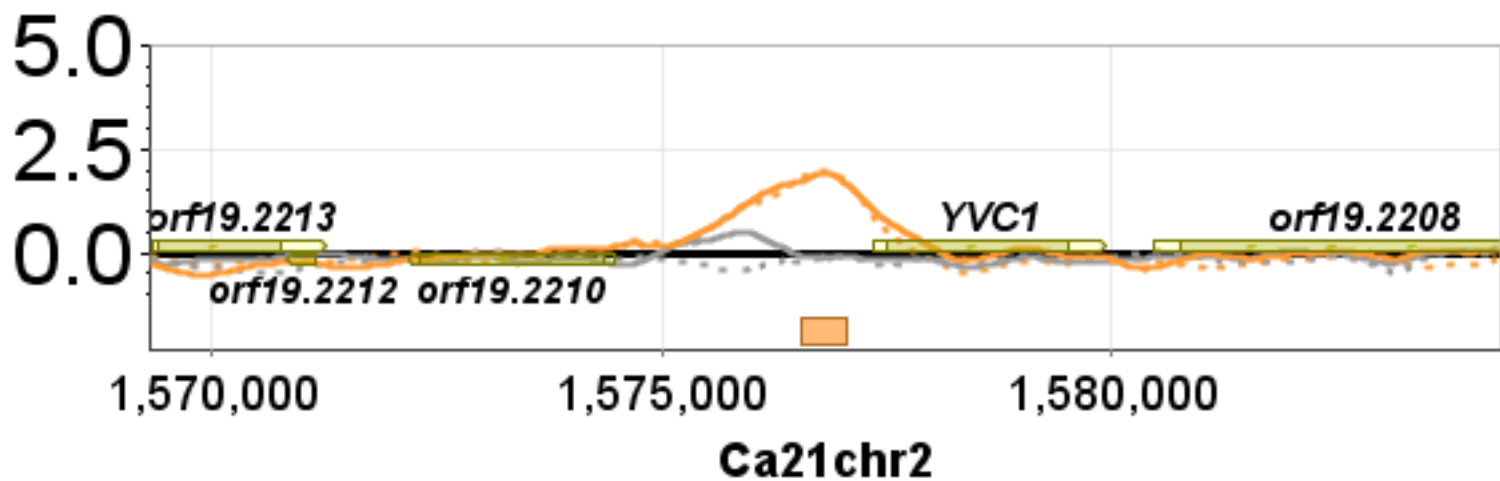

[1.985] Ca21chr5:104117-119116 [+] [AGA1, ntar\_854, orf19.936, orf19.937, orf19.938]

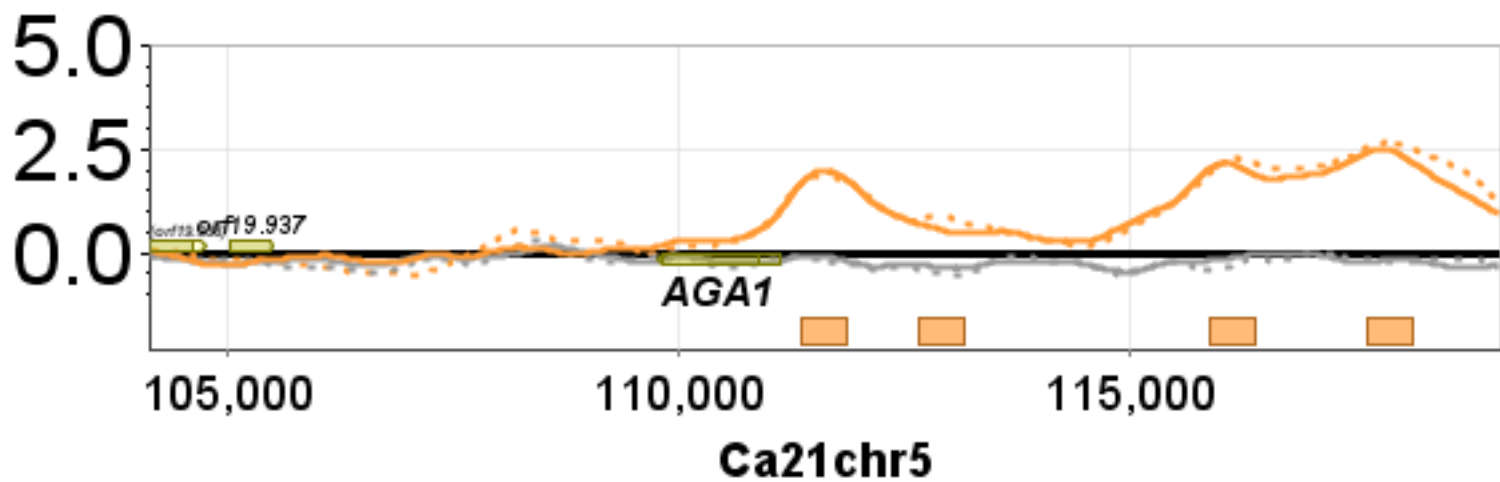

[1.984] Ca21chrR:974133-989132 [+] [orf19.533, RBR1, RBR2, ntar\_1259, orf19.530]

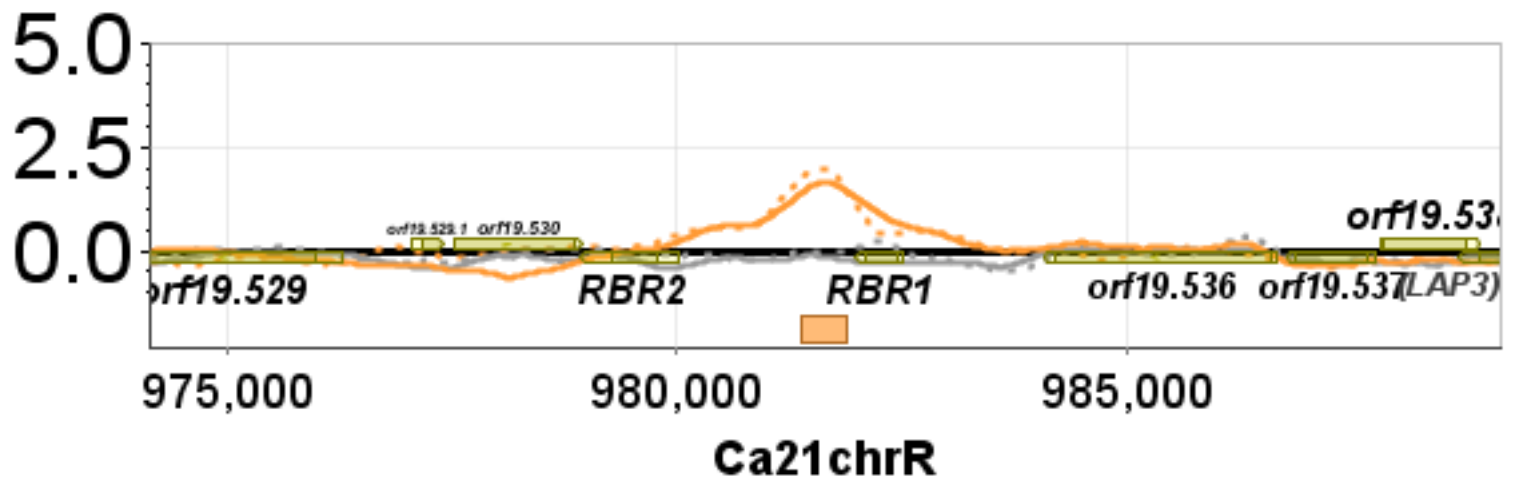

[1.98] Ca21chr1:1149802-1164801 [+] [ntar\_114, RPS27A, orf19.413, ntar\_115, orf19.414]

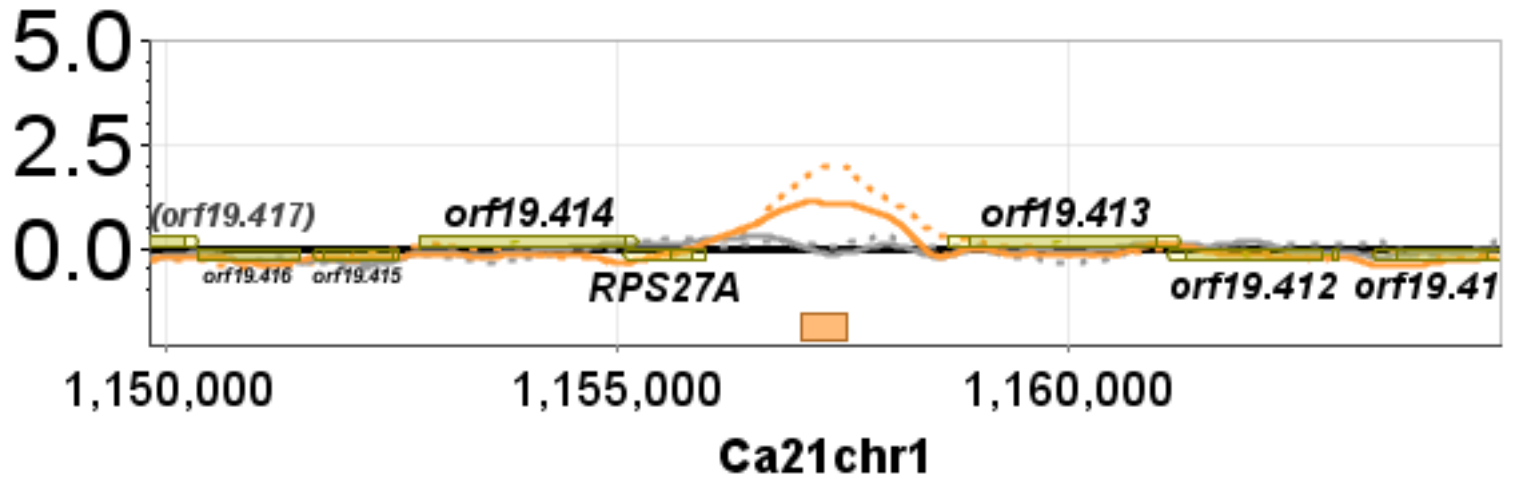

[1.973] Ca21chr2:1414831-1429830 [+] [orf19.2247, ARE2, orf19.2246, ntar\_427, orf19.2249]

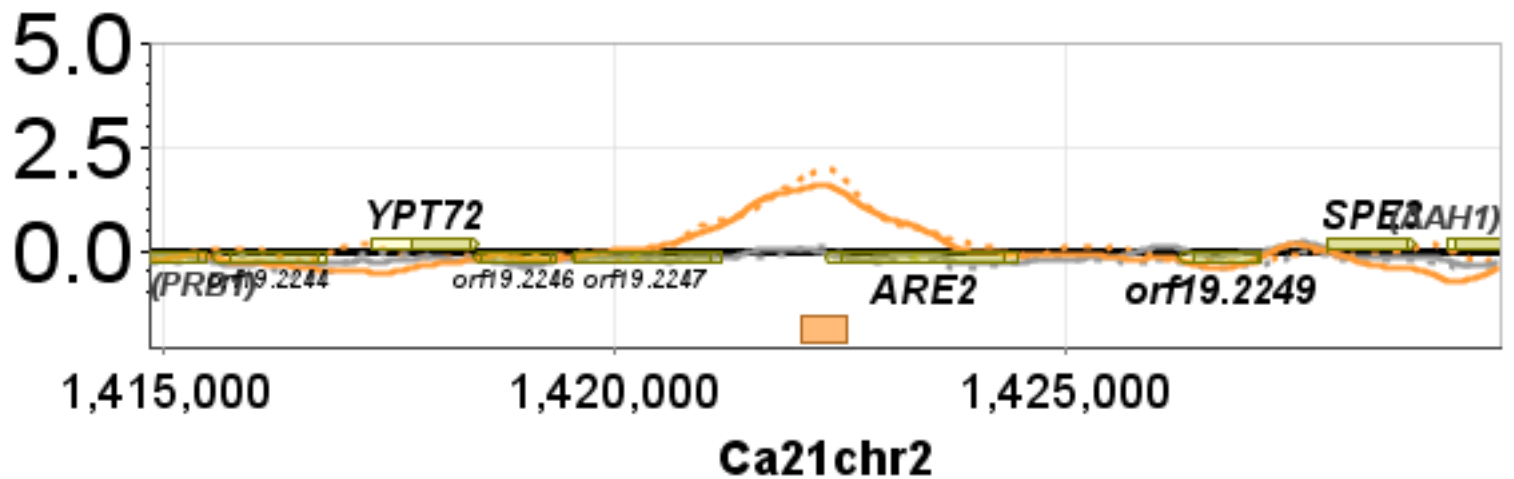

[1.957] Ca21chr5:713309-728308 [+] [ntar\_1412, orf19.4349, orf19.2657, orf19.4348]

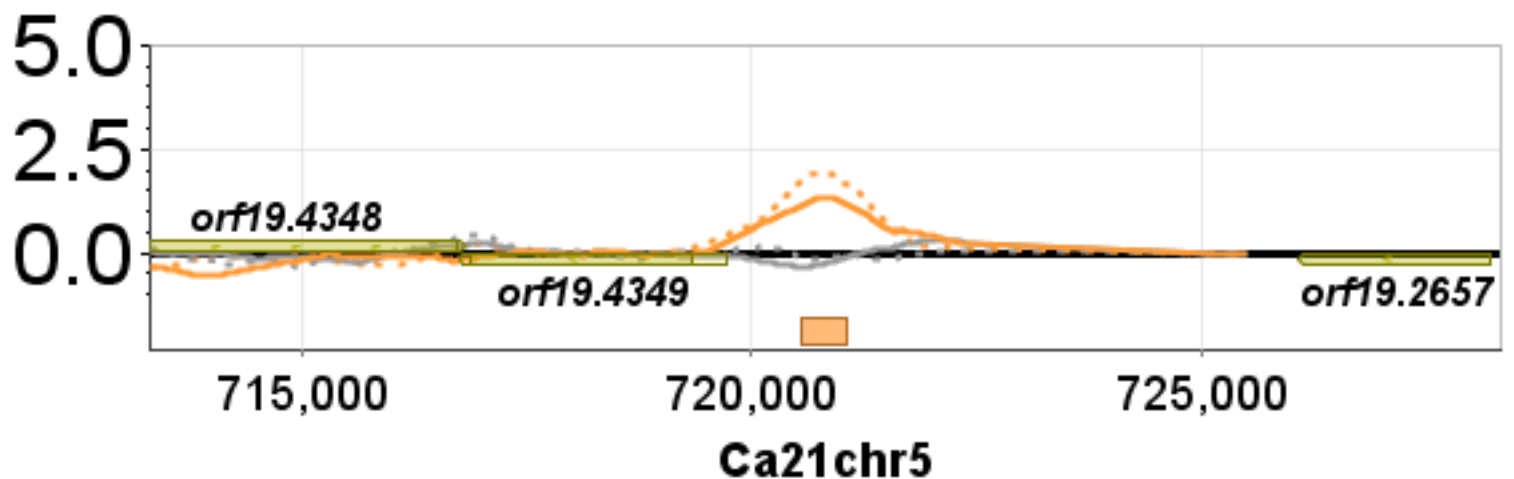

[1.943] Ca21chrR:2073927-2088926 [+] [ntar\_1394.5, ntar\_1395, IFA14, ntar\_1396, ntar\_1396.5]

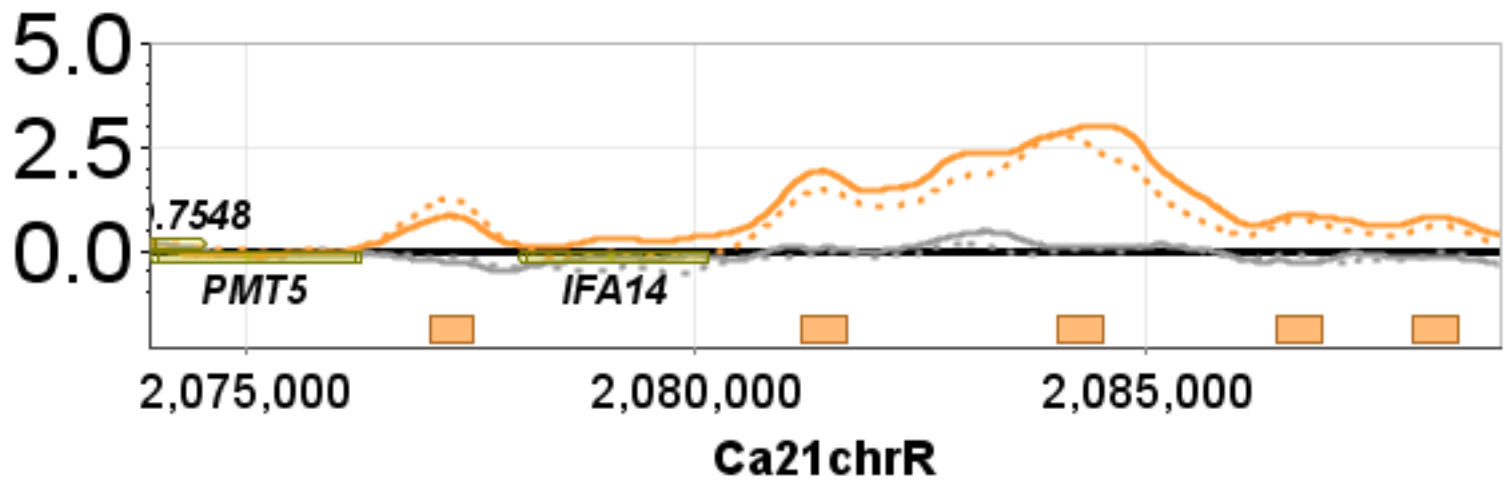

[1.937] Ca21chr6:148003-163002 [+] [SUN41, orf19.3643, CAN3]

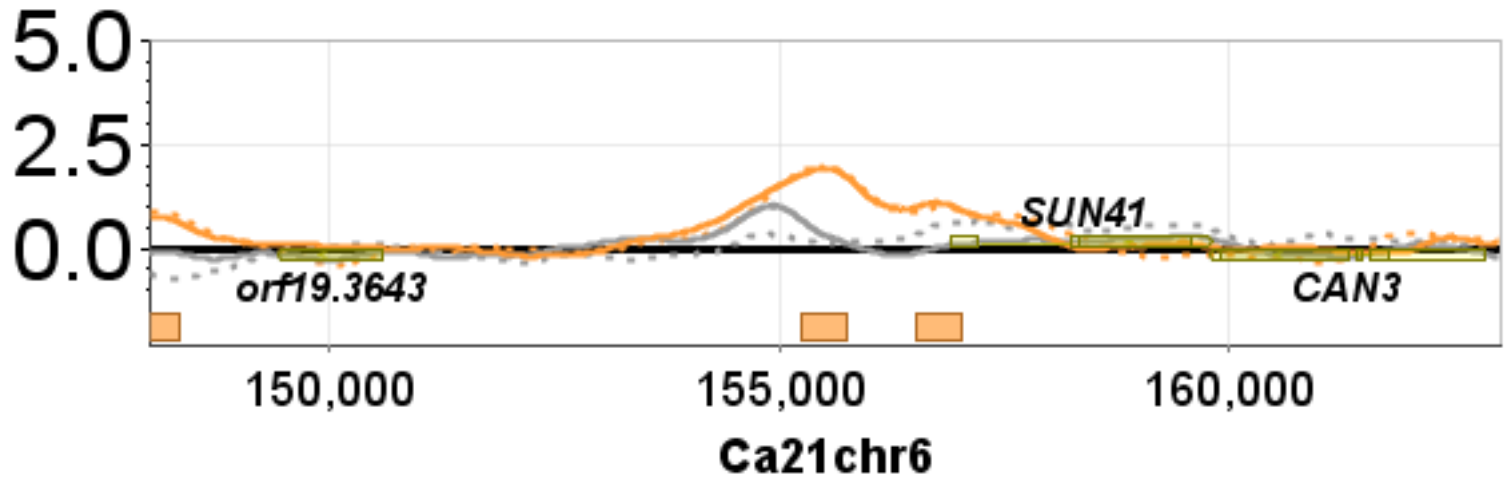

[1.936] Ca21chr2:725642-740641 [+] [ntar\_353, orf19.871, orf19.872, ntar\_354, ADAEC]

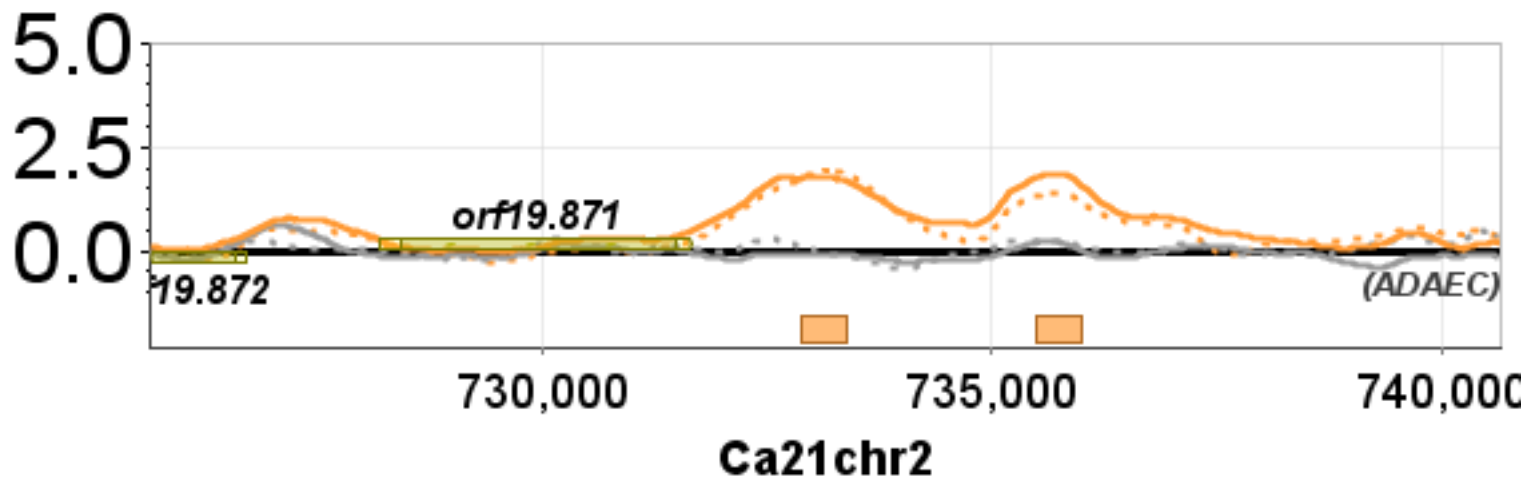

[1.915] Ca21chr2:1830466-1845465 [+] [ntar\_465, ntar\_466, orf19.204, ntar\_464, orf19.206]

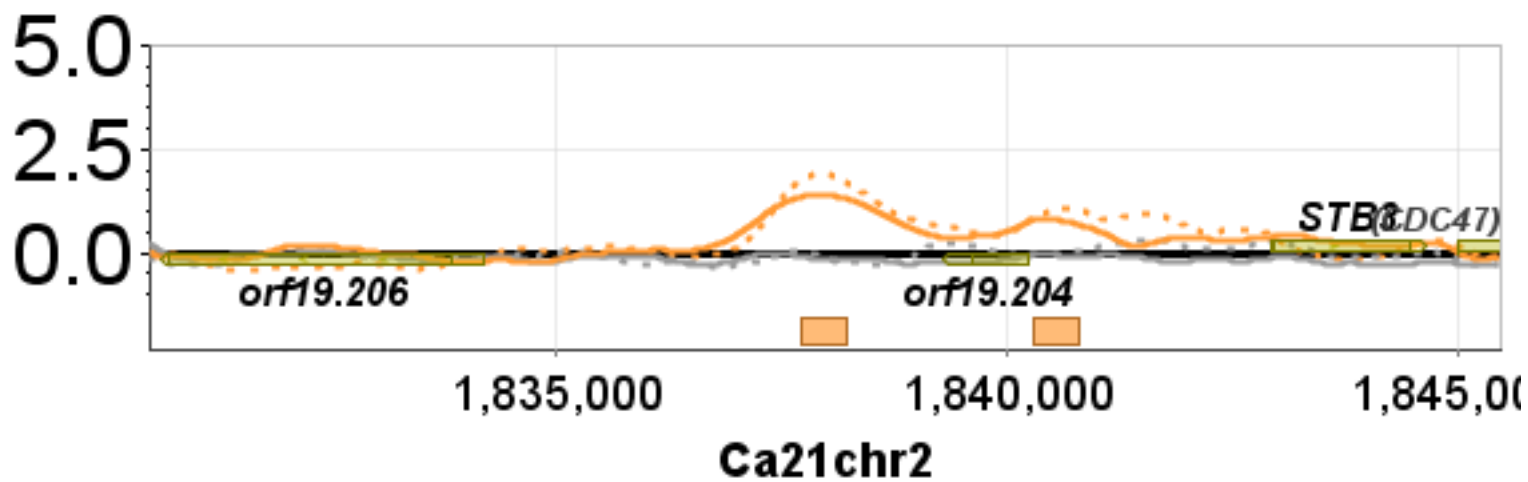

[1.905] Ca21chrR:2151455-2166454 [+] [INO1, CHT3, ntar\_1403, orf19.7583, orf19.7588]

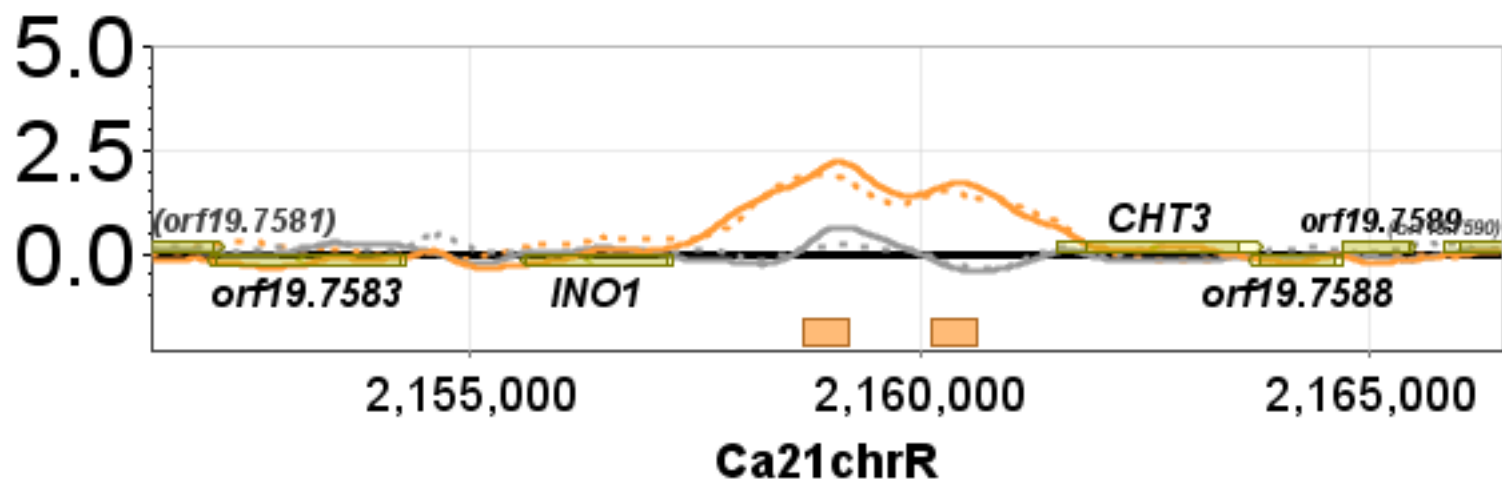

[1.903] Ca21chr4:868645-883644 [+] [PGA31, orf19.5300, ECM1, ntar\_792, PGA30]

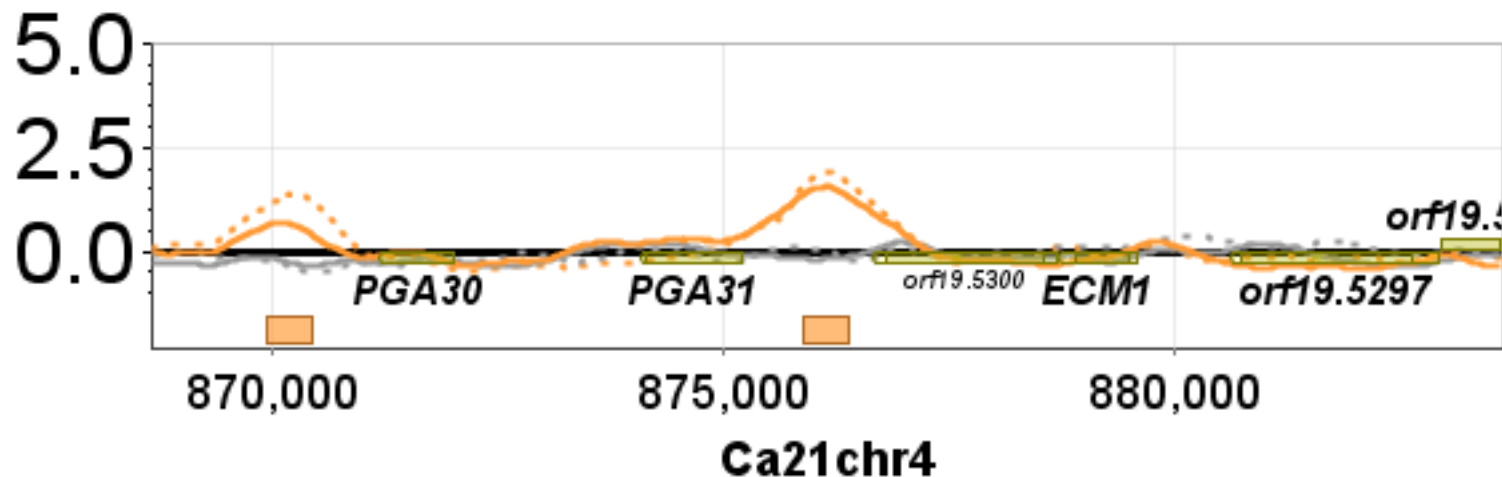

[1.897] Ca21chrR:1518664-1533663 [+] [CRZ2, ntar\_1331, URA2, ALS3]

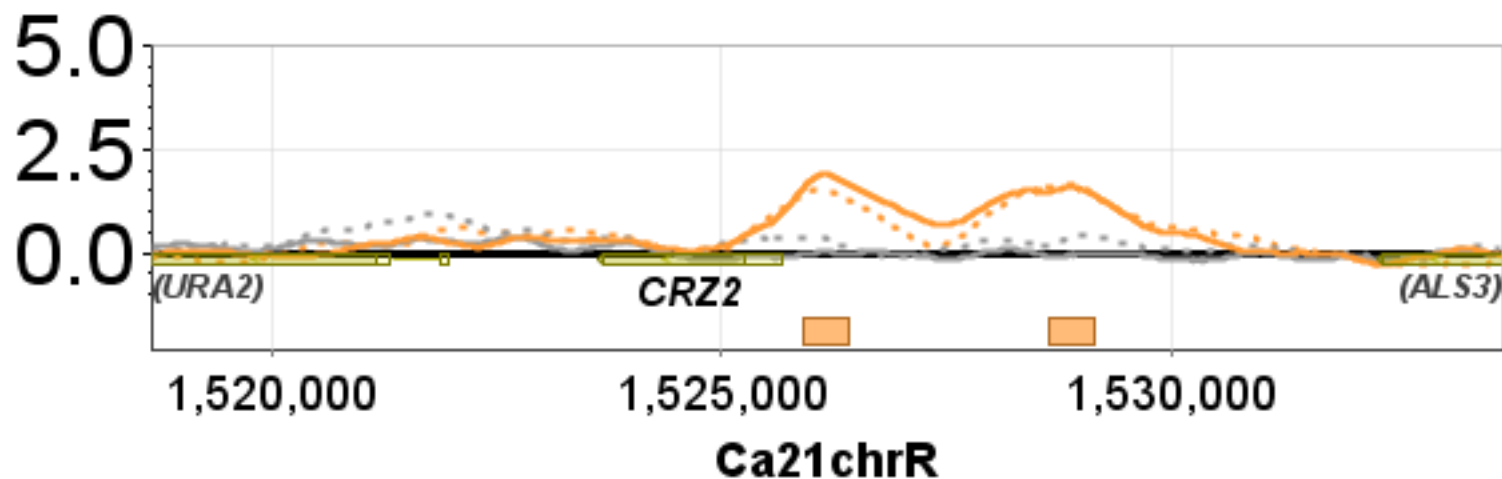

[1.891] Ca21chr3:1353361-1368360 [+] [orf19.7381, CAM1]

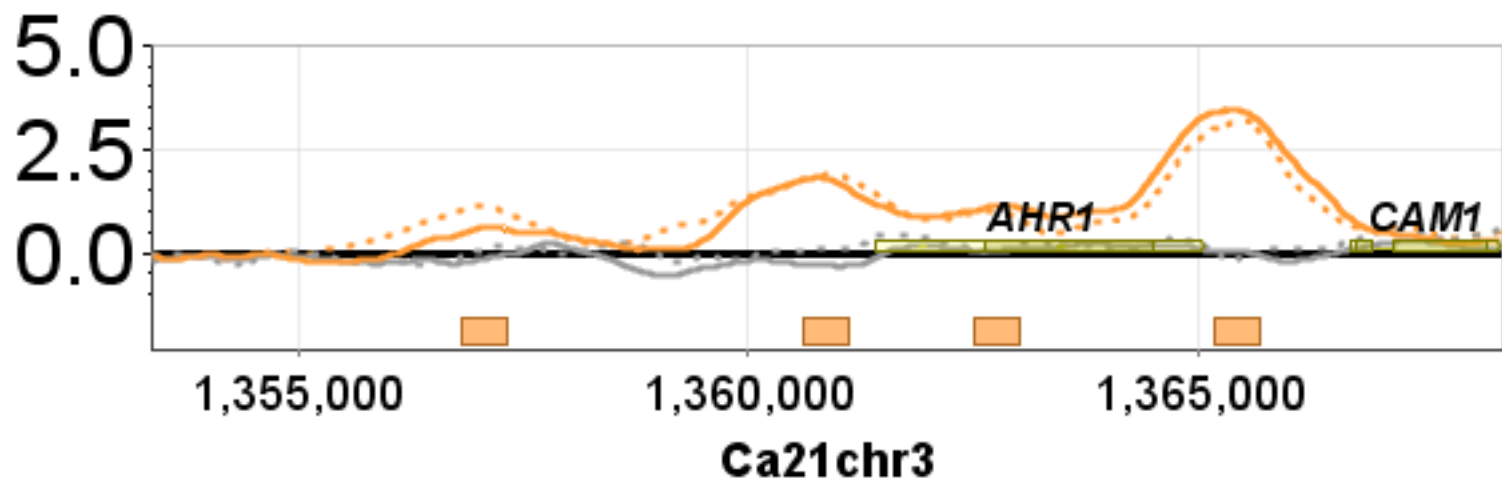



[1.889] Ca21chr1:140169-155168 [+] [ntar\_16, orf19.6027, HGC1, ERG2]

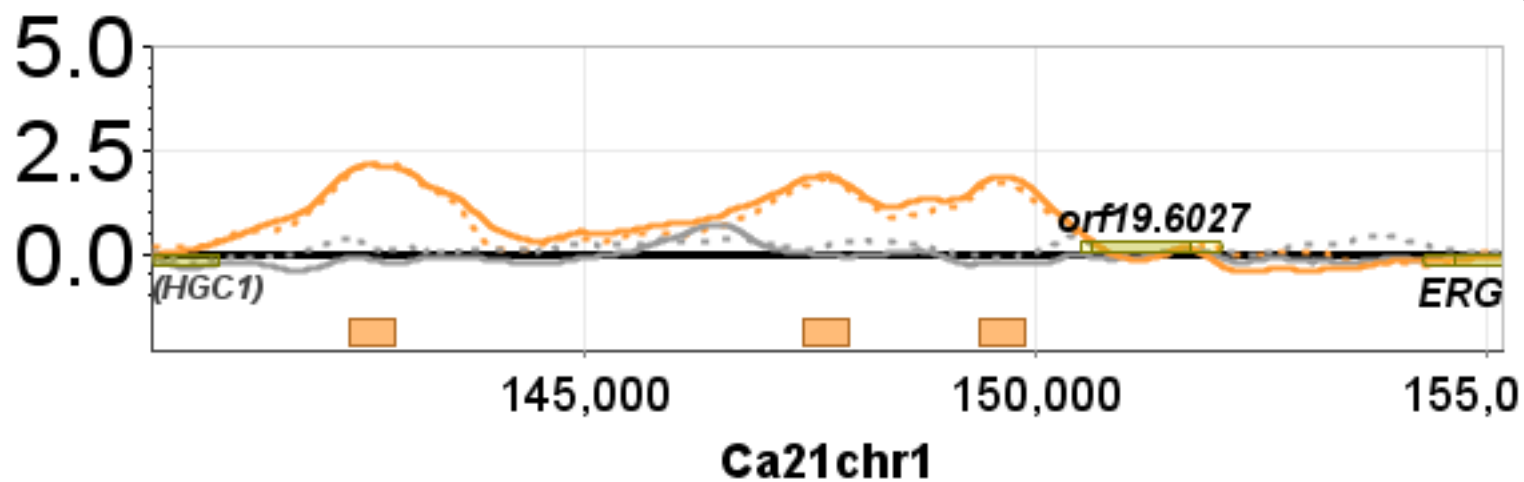

[1.875] Ca21chrR:589102-604101 [+] [RFG1, ntar\_1219]

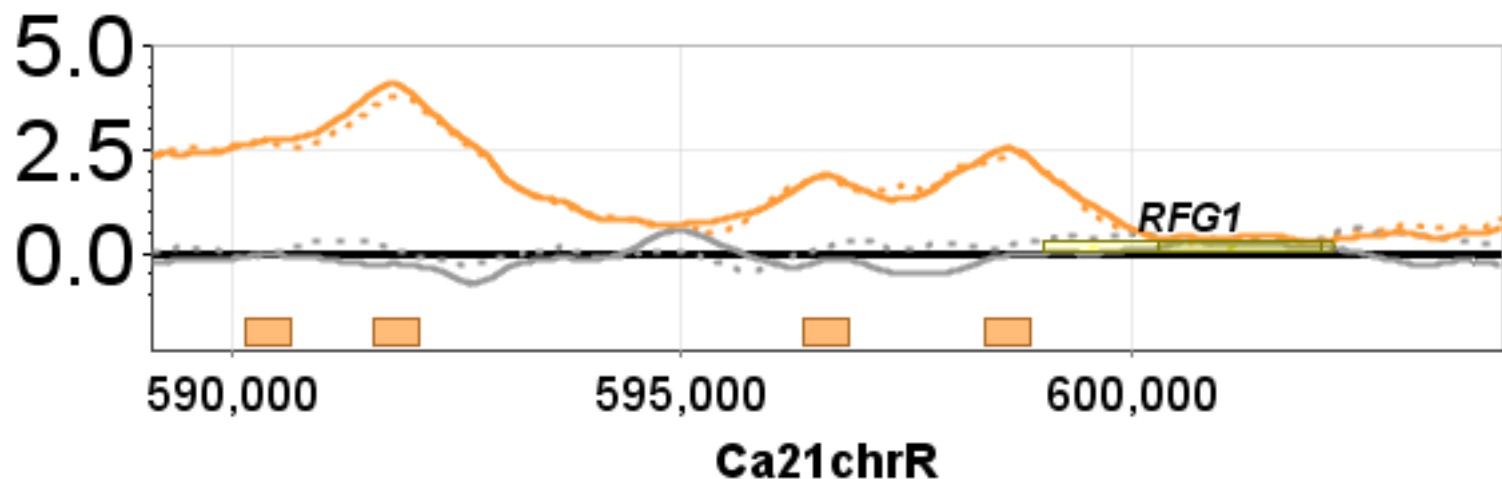

[1.871] Ca21chr5:725799-740798 [+] [RMS1, BUB3, orf19.2657, orf19.2653]

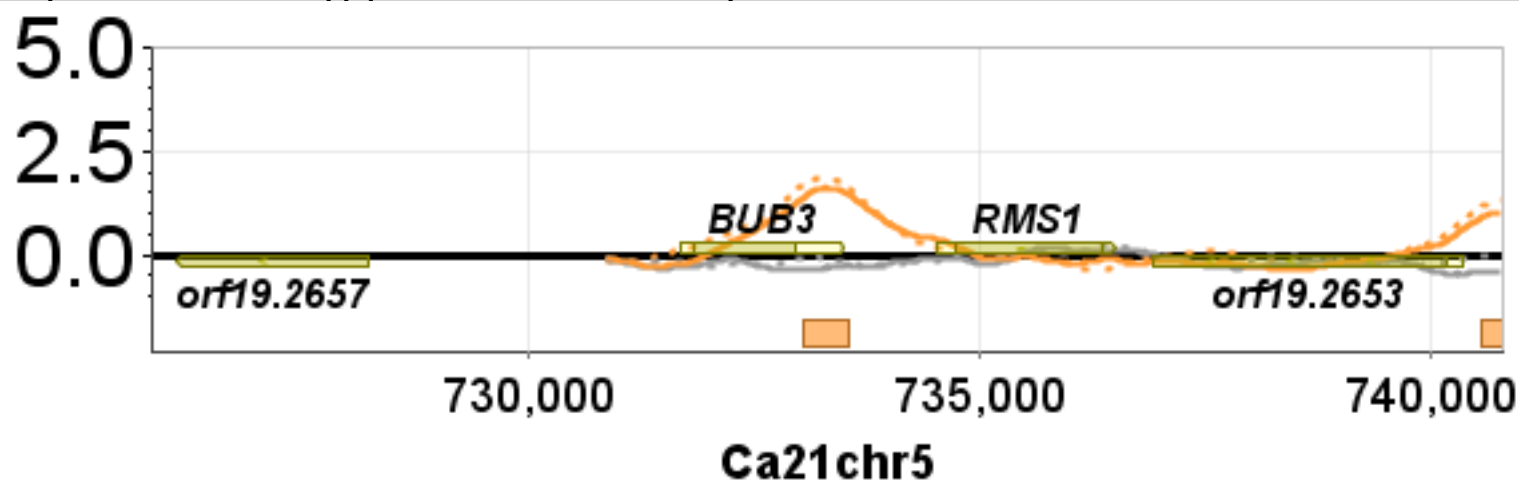

[1.87] Ca21chr7:440744-455743 [+] [ntar\_1102, ntar\_1103, CUP9, ntar\_1101, HSP90]

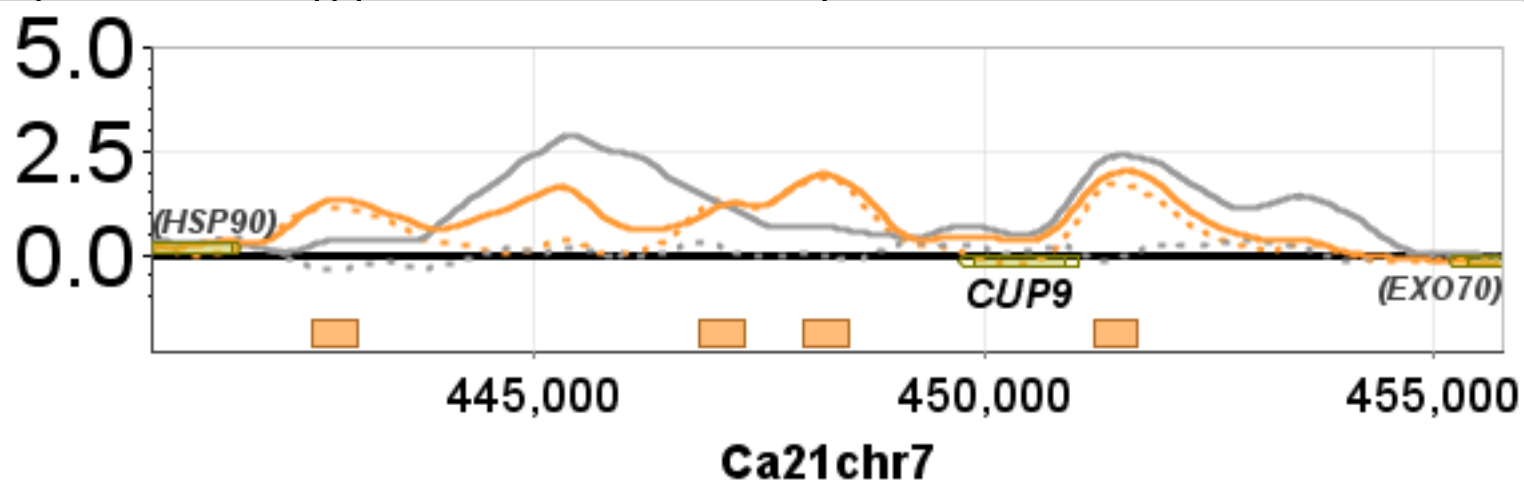

[1.868] Ca21chr2:728249-743248 [+] [ntar\_353, ntar\_354, ADAEC, orf19.871]

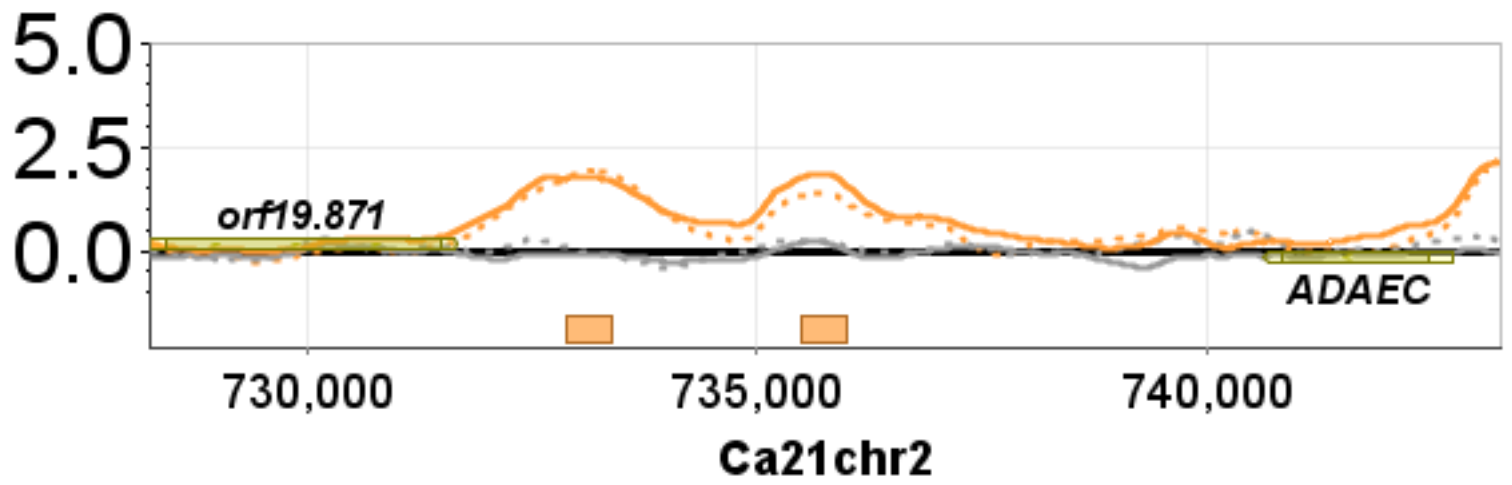

[1.866] Ca21chr1:3051500-3066499 [+] [orf19.5026, ntar\_274, ntar\_275, ta(aqc)7, LCB2]

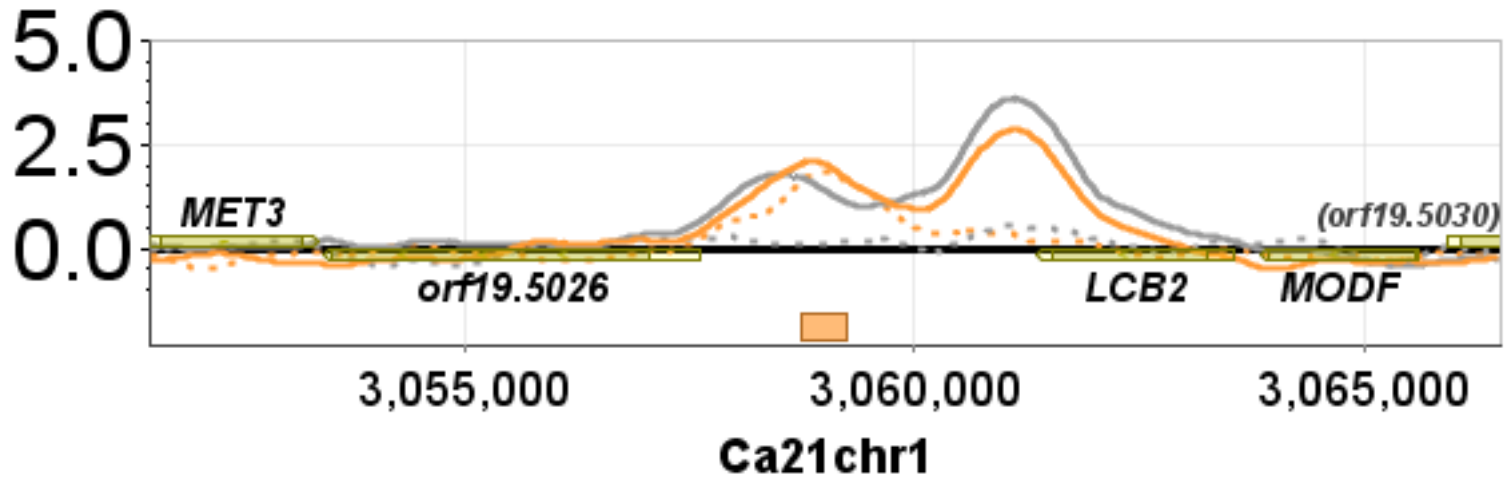

[1.862] Ca21chr3:1103684-1118683 [+] [ntar\_613, orf19.5991, WOR2, orf19.5989]

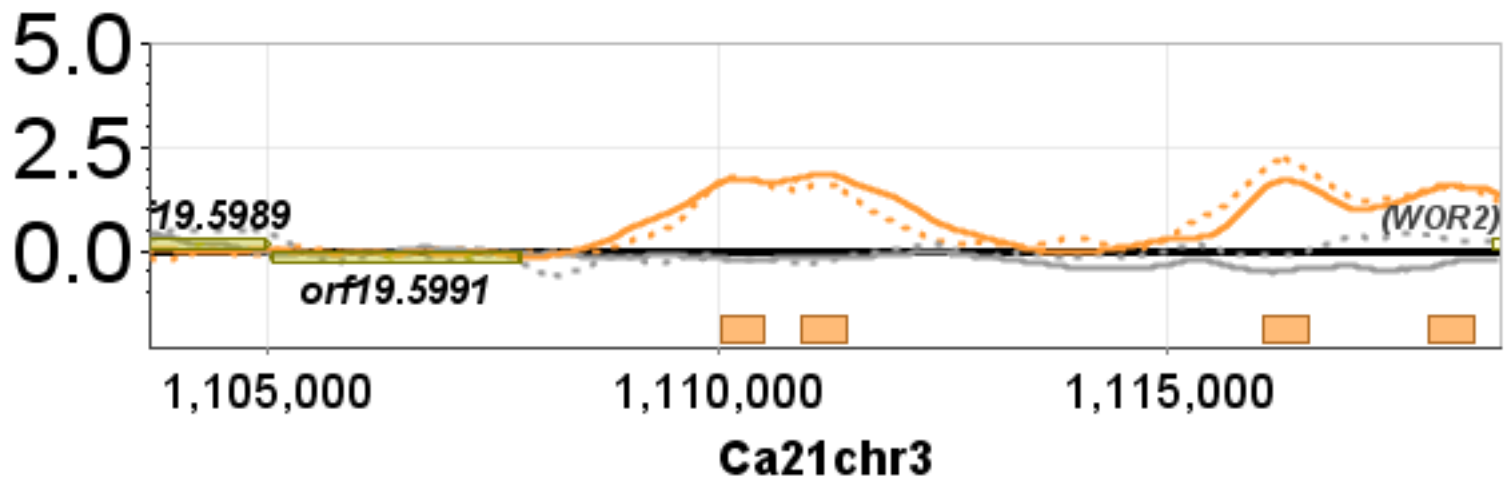

[1.858] Ca21chr1:142134-157133 [+] [orf19.6027, ntar\_16, ERG2, orf19.6025, orf19.6024]

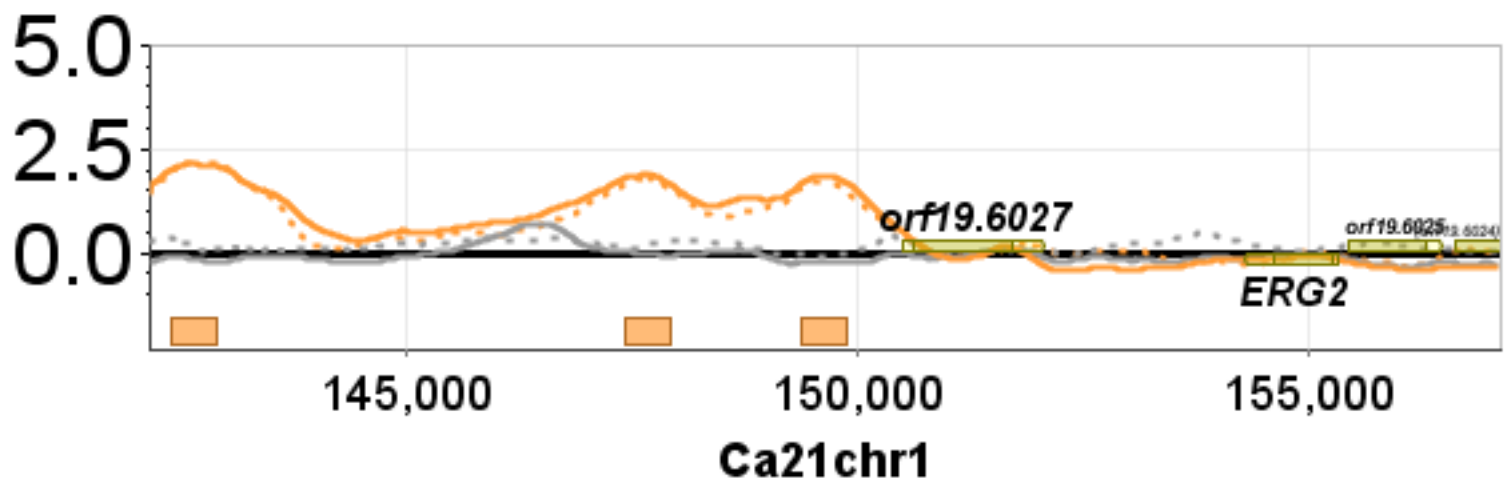

[1.853] Ca21chr4:792263-807262 [+] [orf19.1301, orf19.1302, orf19.1303, orf19.1300, RPN6]

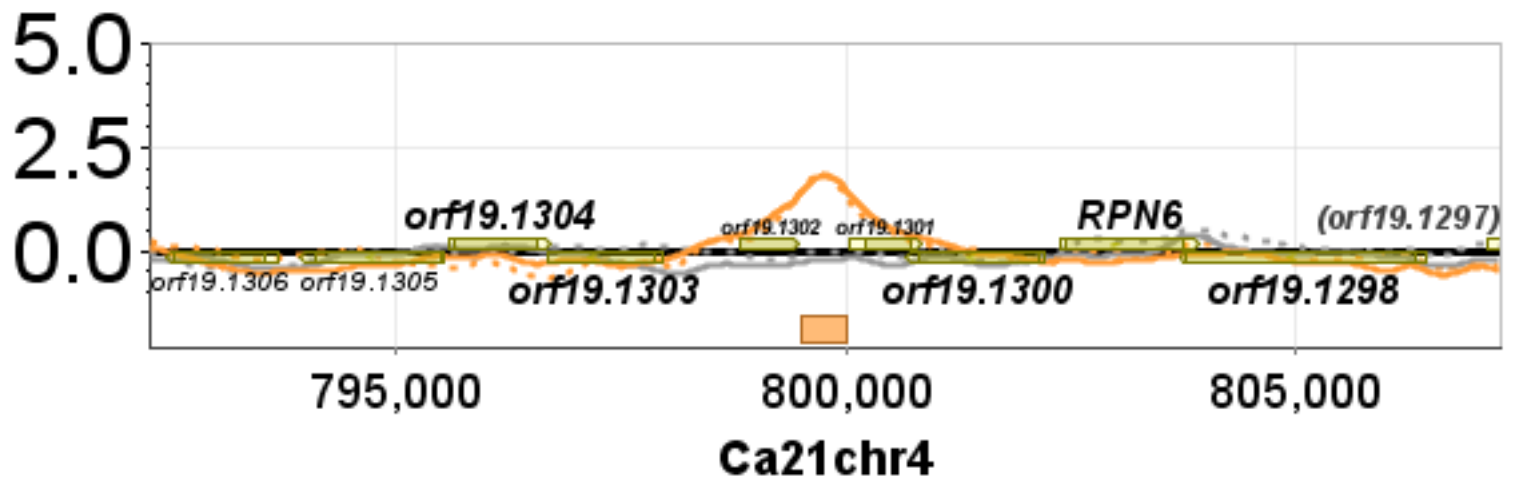

[1.835] Ca21chr7:906300-921299 [+] [ntar\_1151, ntar\_1152, orf19.7151, ntar\_1153, NRG1]

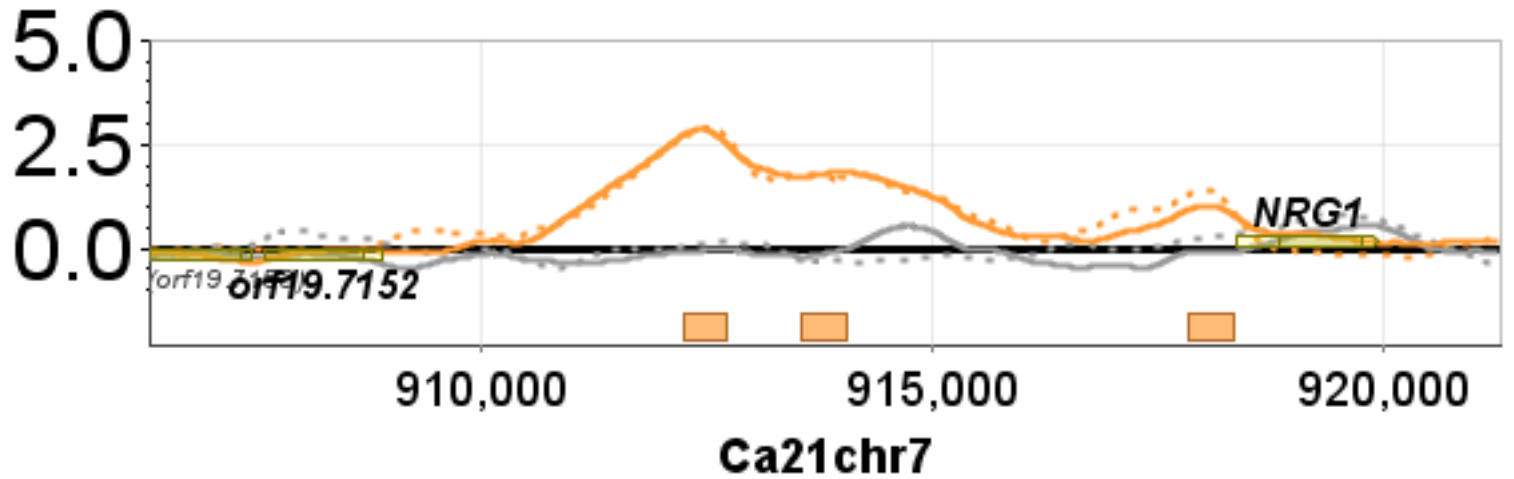

[1.831] Ca21chr5:848597-863596 [+] [orf19.1105.3, PGA56, orf19.1105, orf19.3220, orf19.1106]

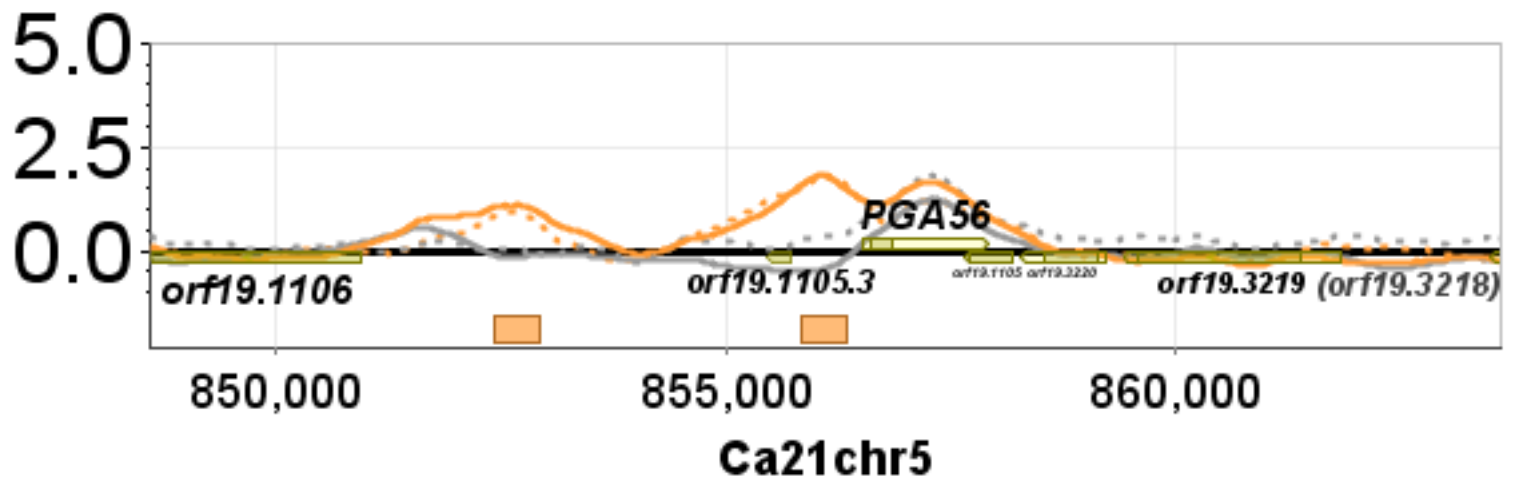

[1.831] Ca21chrR:1305098-1320097 [+] [ntar\_1302, ntar\_1301, ntar\_1300, orf19.3868, RPL7]

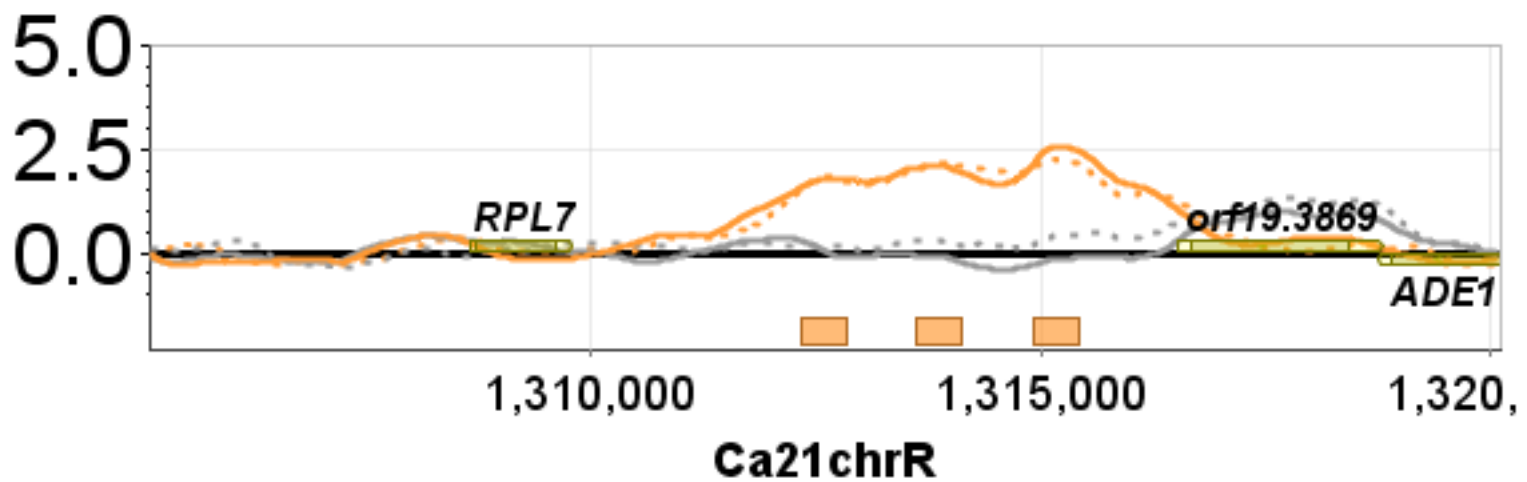

[1.815] Ca21chr3:566209-581208 [+] [orf19.255, orf19.257, orf19.258, orf19.254, orf19.259]

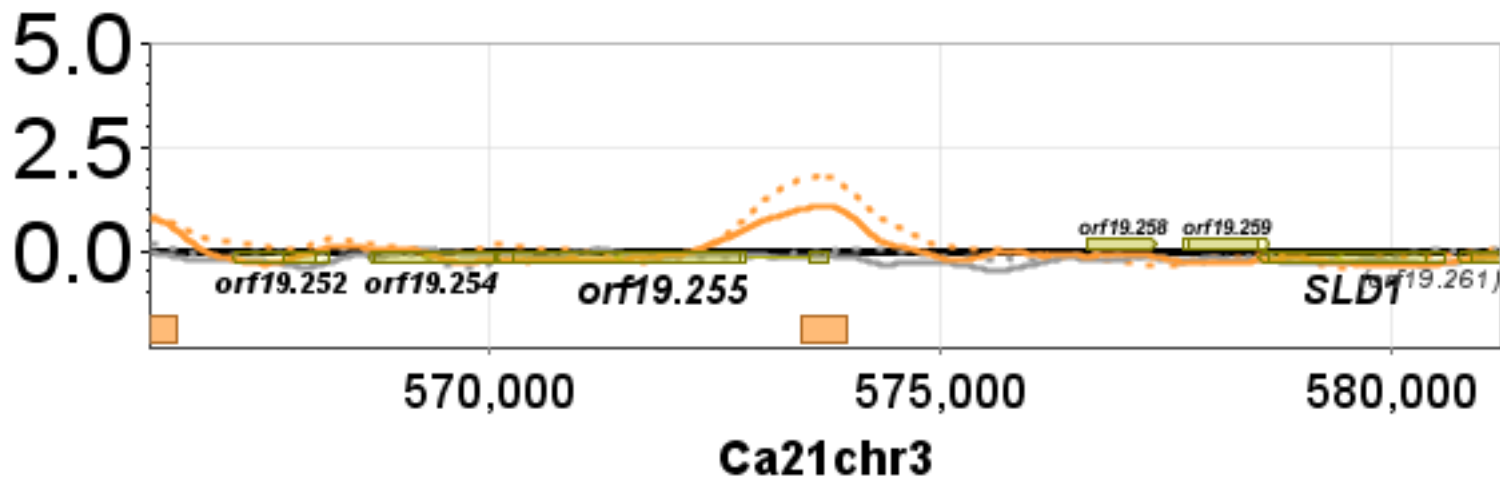

[1.804] Ca21chr1:3102311-3117310 [+] [RBE1, RPL4B, ntar\_278, FTR1, orf19.7216]

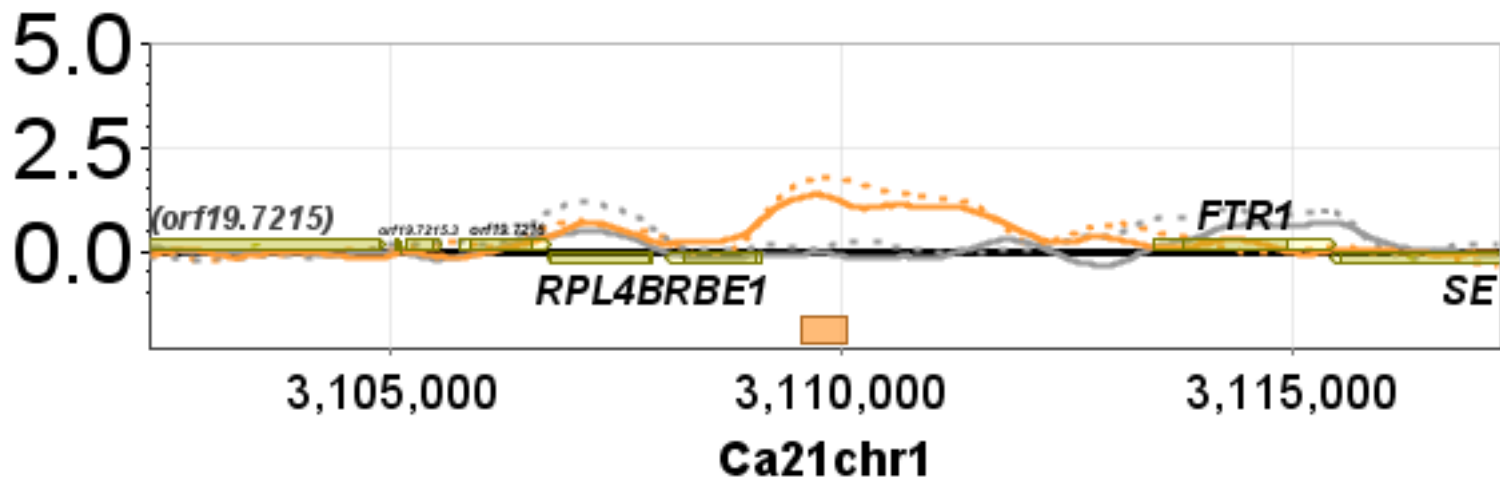

[1.784] Ca21chr5:492758-507757 [+] [ntar\_890, PTH2, PTH1, THR4, orf19.4234]

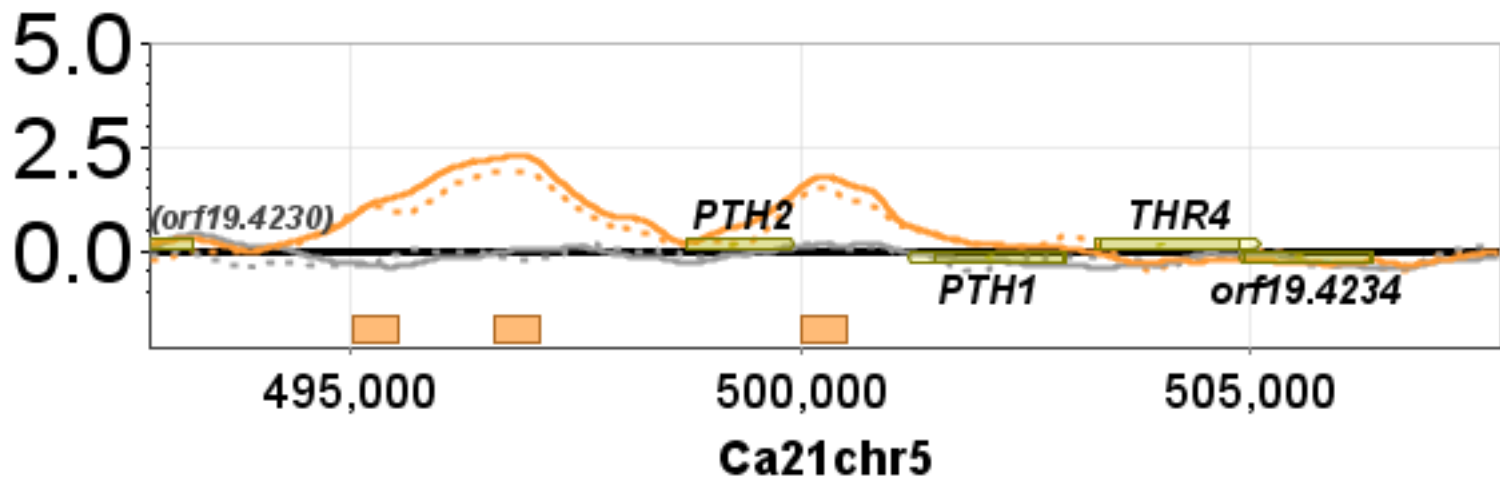

[1.77] Ca21chr3:123801-138800 [+] [ntar\_534, ntar\_533, PMA1, ntar\_532, ntar\_531]

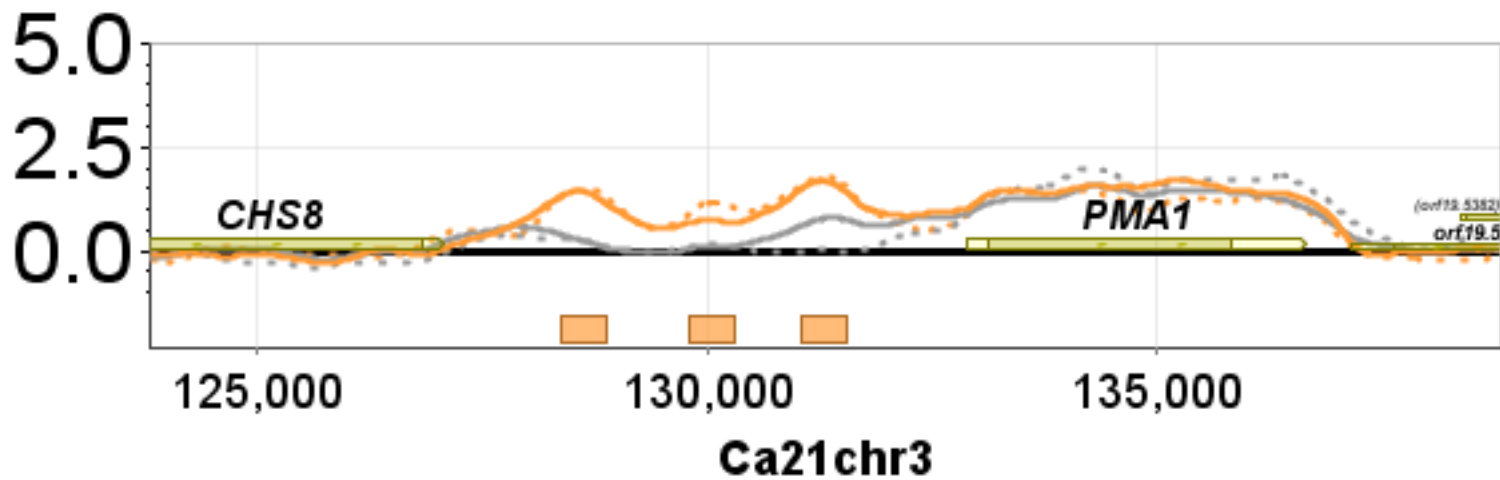

[1.766] Ca21chr3:1102778-1117777 [+] [ntar\_613, orf19.5991, orf19.5989, orf19.5987]

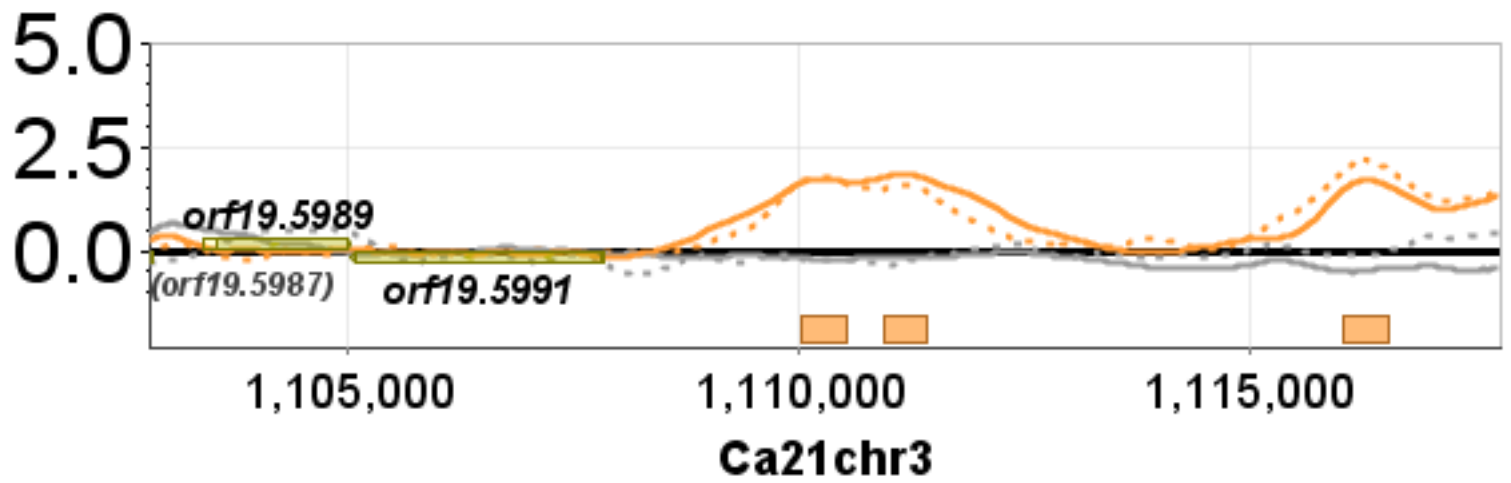

[1.761] Ca21chr4:193632-208631 [+] [DAG7, ntar\_726, PGA57, orf19.4686, orf19.4685]

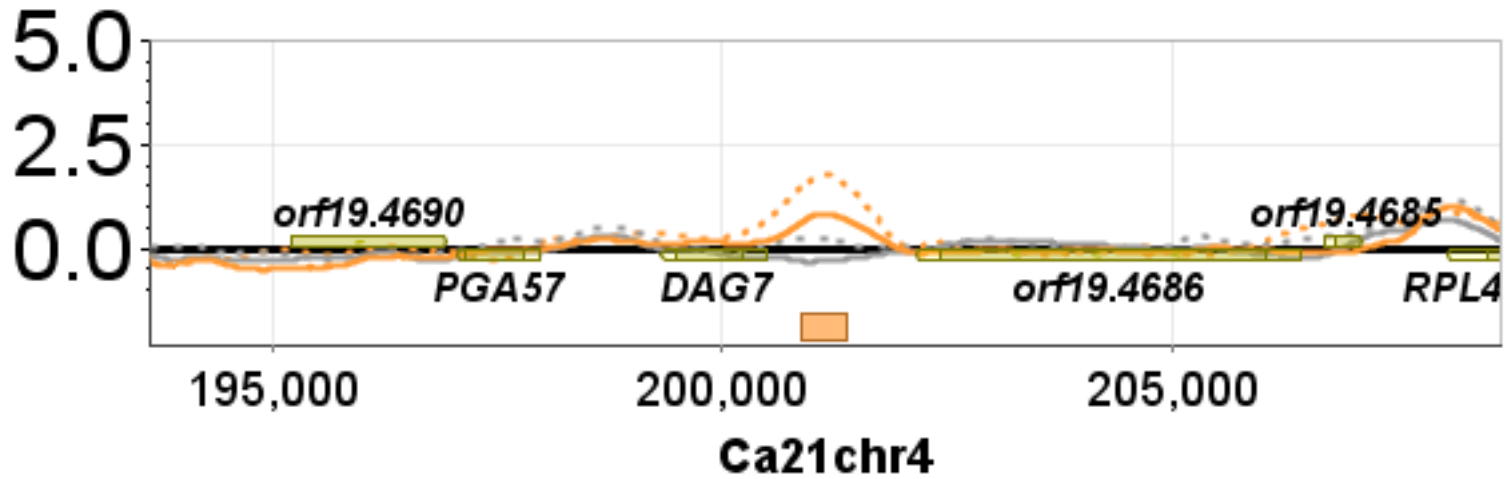

[1.761] Ca21chrR:1188983-1203982 [+] [orf19.5843, ntar\_1289, orf19.6653, DBP8, tc(gca)1]

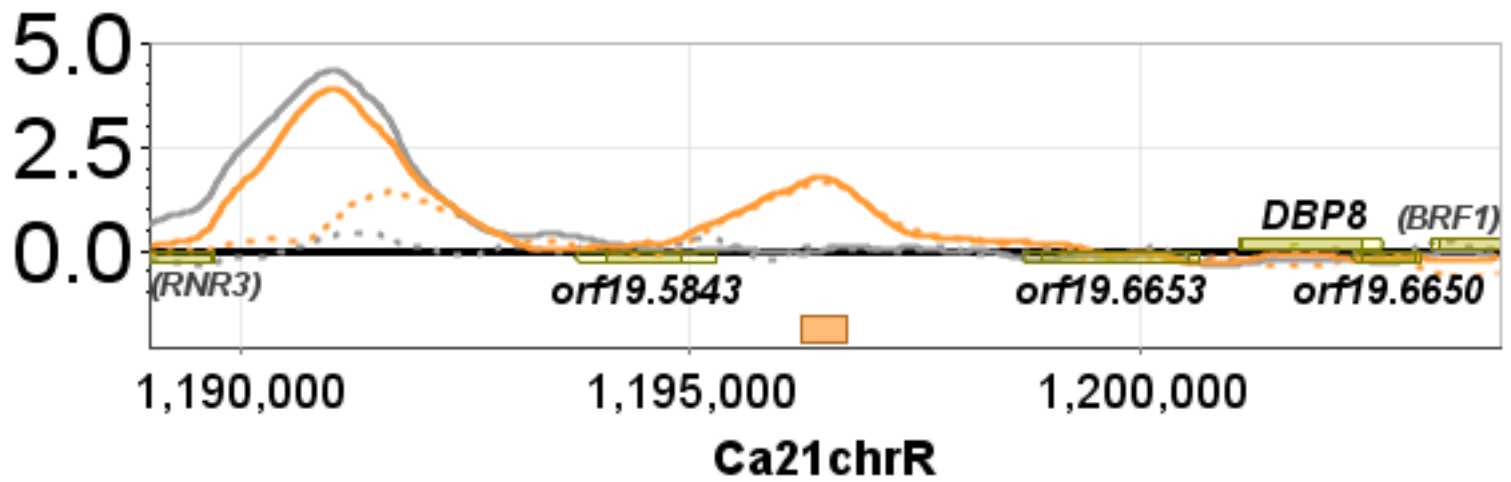

[1.76] Ca21chr2:10918-25917 [+] [orf19.1906, EMC9, ntar\_288, NDT80, LEU5]

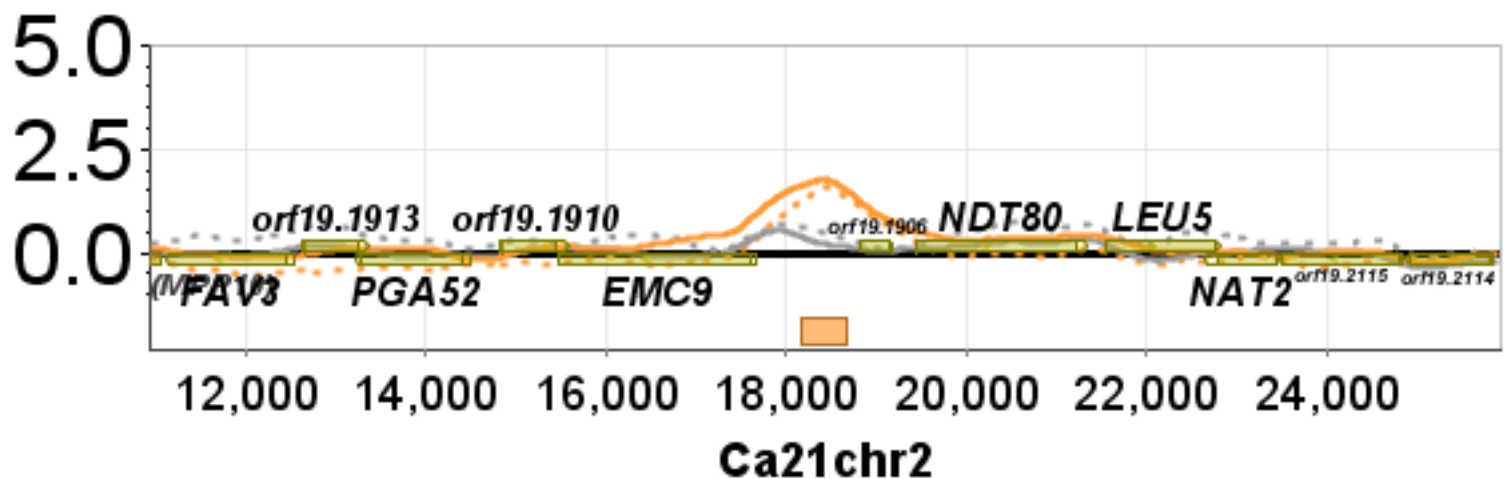

[1.755] Ca21chr1:2093739-2108738 [+] [ntar\_197, orf19.4818, orf19.4819, RAM2, ntar\_198]

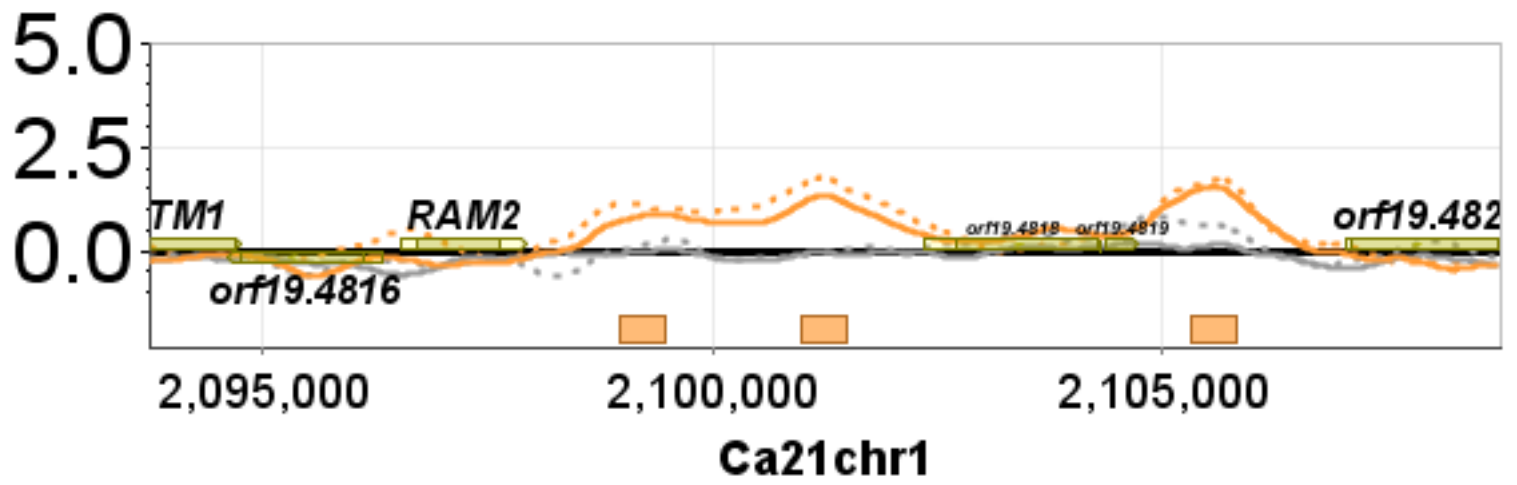

[1.752] Ca21chr7:357574-372573 [+] [orf19.6556, ntar\_1094, ntar\_1093, orf19.6555, orf19.6554]

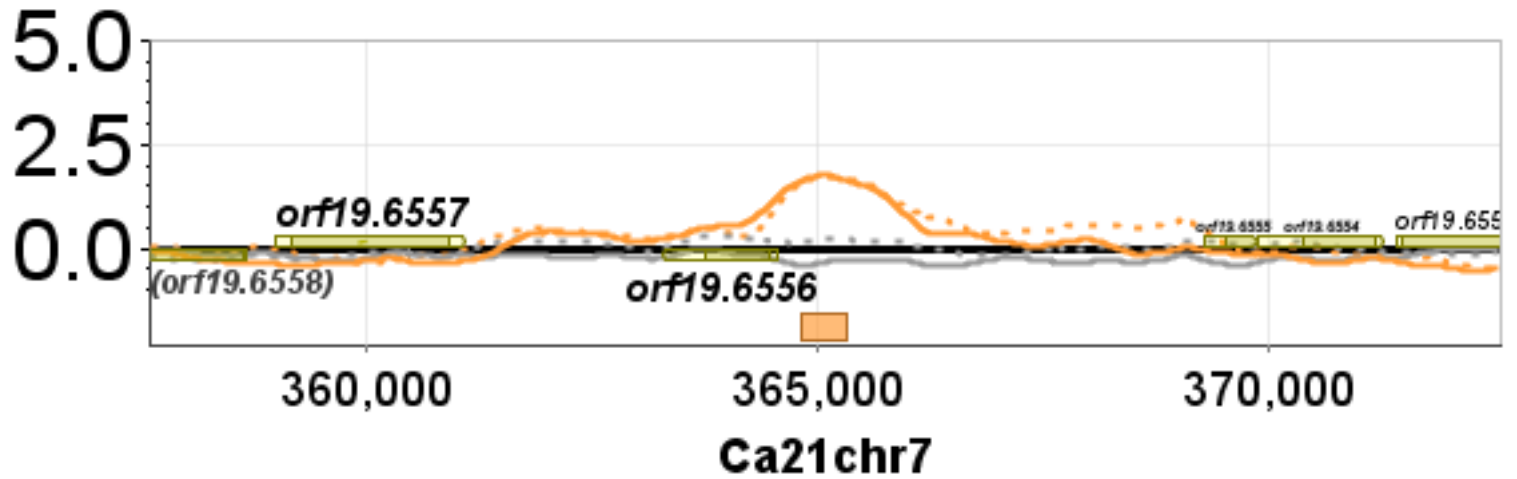

[1.747] Ca21chr3:1137855-1152854 [+] [CDR1, DYN1, SAP3, ntar\_620]

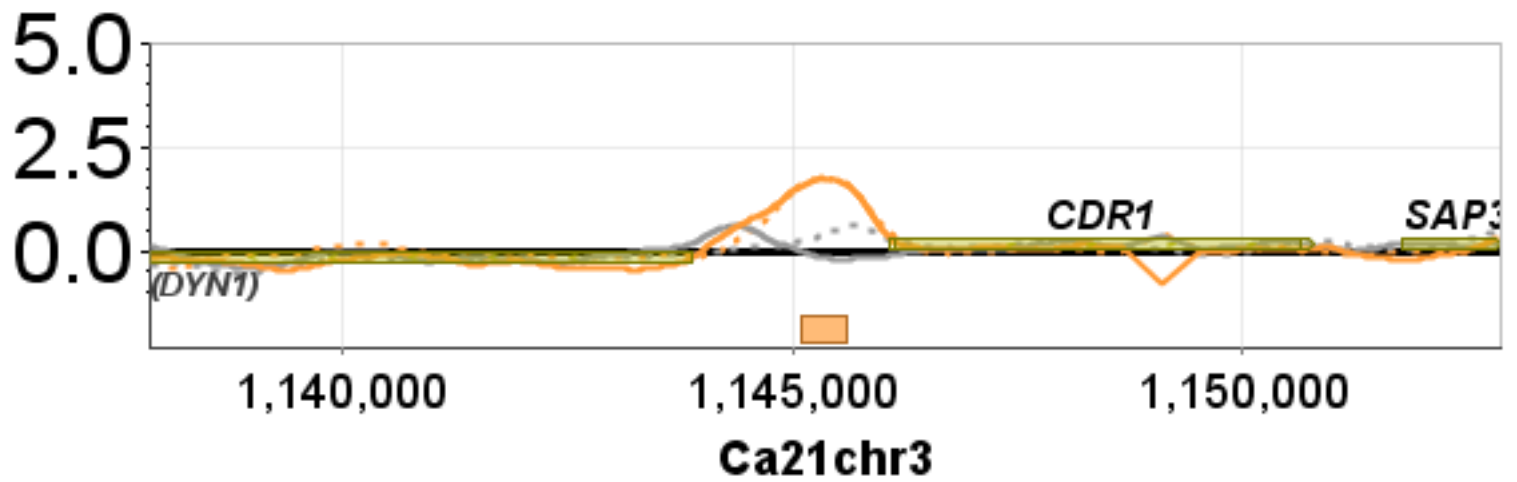

[1.742] Ca21chr7:443961-458960 [+] [CUP9, ntar\_1102, ntar\_1103, EXO70, ntar\_1101]

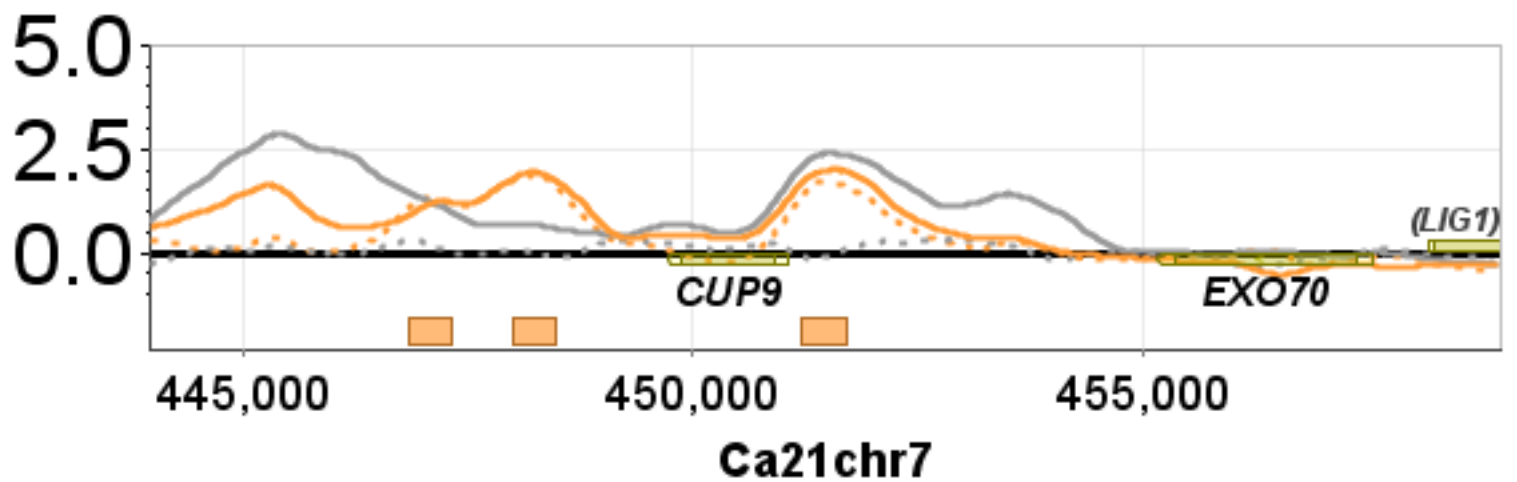

[1.734] Ca21chrR:167985-182984 [+] [ntar\_1167, BMT3, orf19.3281, orf19.3280, tt(agu)3]

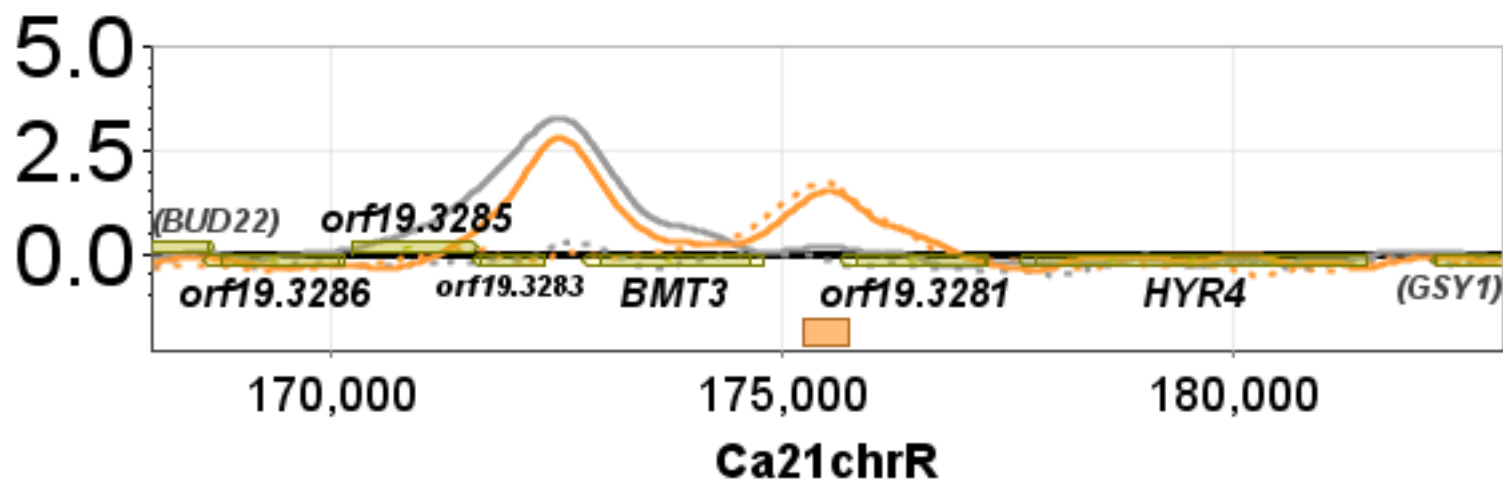

[1.728] Ca21chrR:869709-884708 [+] [orf19.467, ntar\_1253, ntar\_1254, ntar\_1255, HST7]

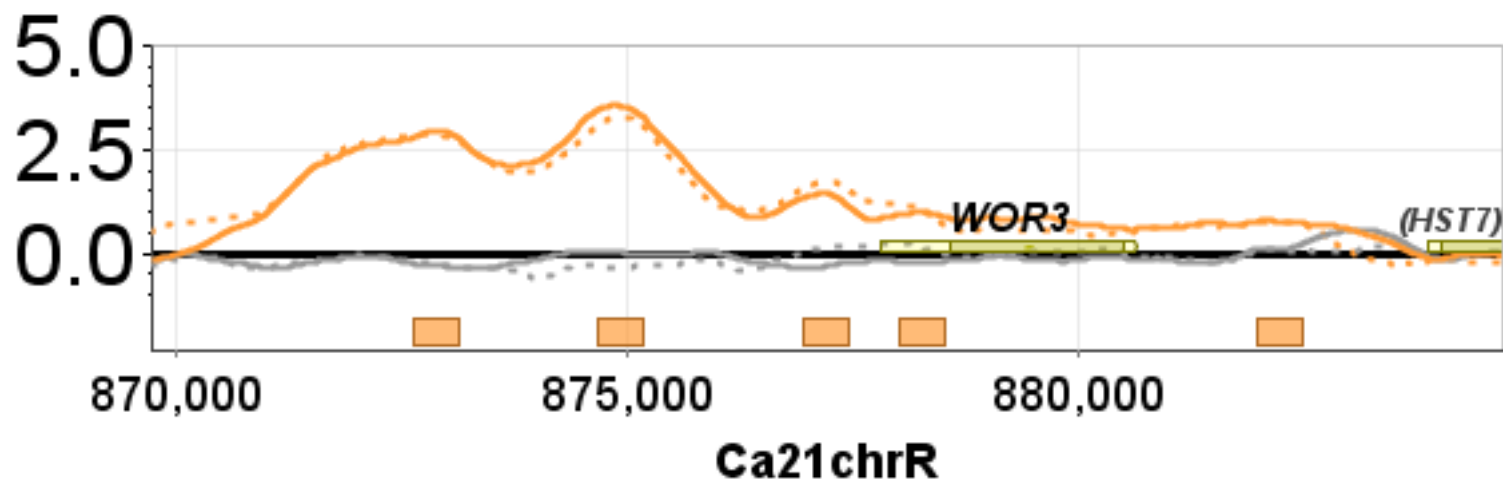

[1.723] Ca21chr1:3063912-3078911 [+] [ntar\_277, SIM1, SSK1, orf19.5033, orf19.5034]

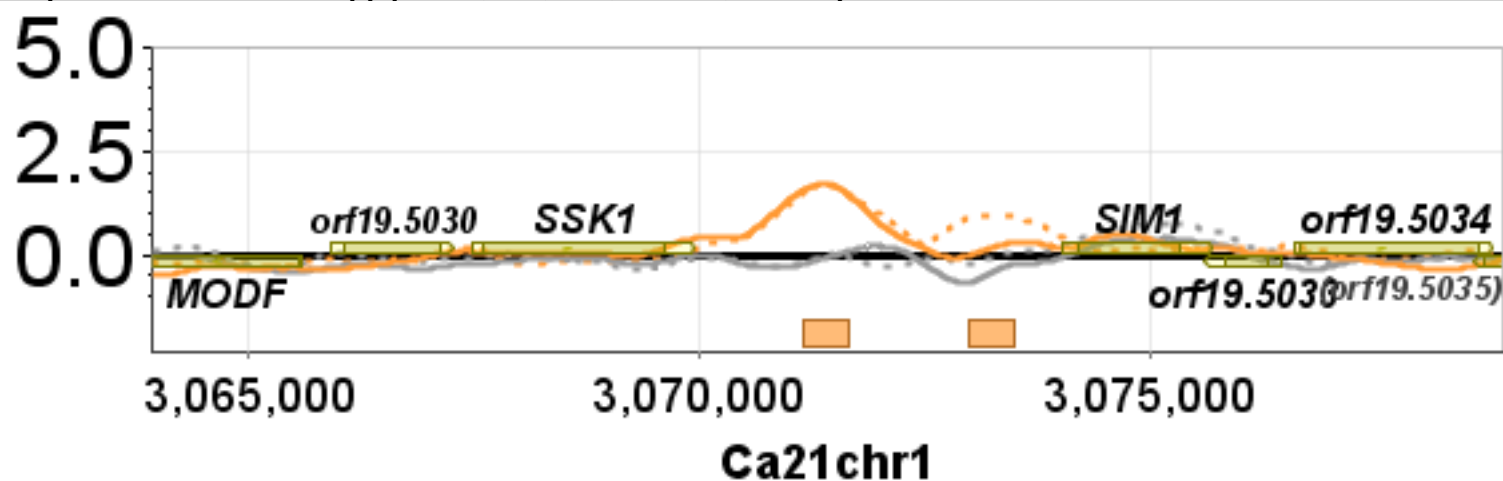

[1.717] Ca21chrR:2152873-2167872 [+] [CHT3, INO1, orf19.7588, orf19.7589, ntar\_1404]

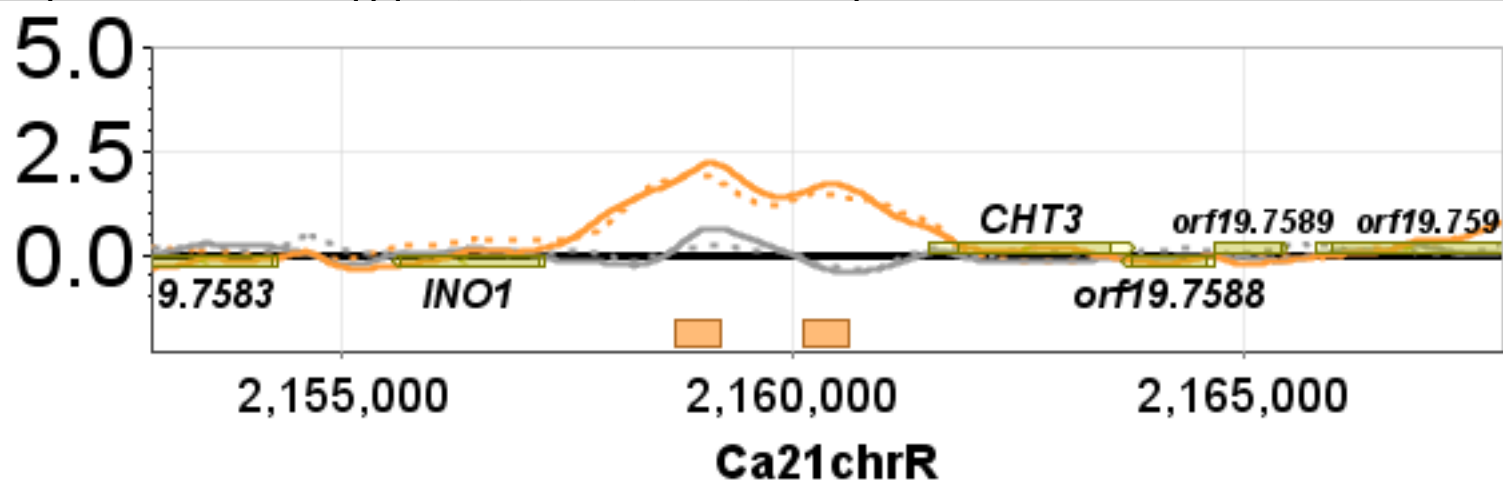

[1.707] Ca21chr6:354057-369056 [+] [PTK2, ntar\_996, SUR7, FGR37, RPL32]

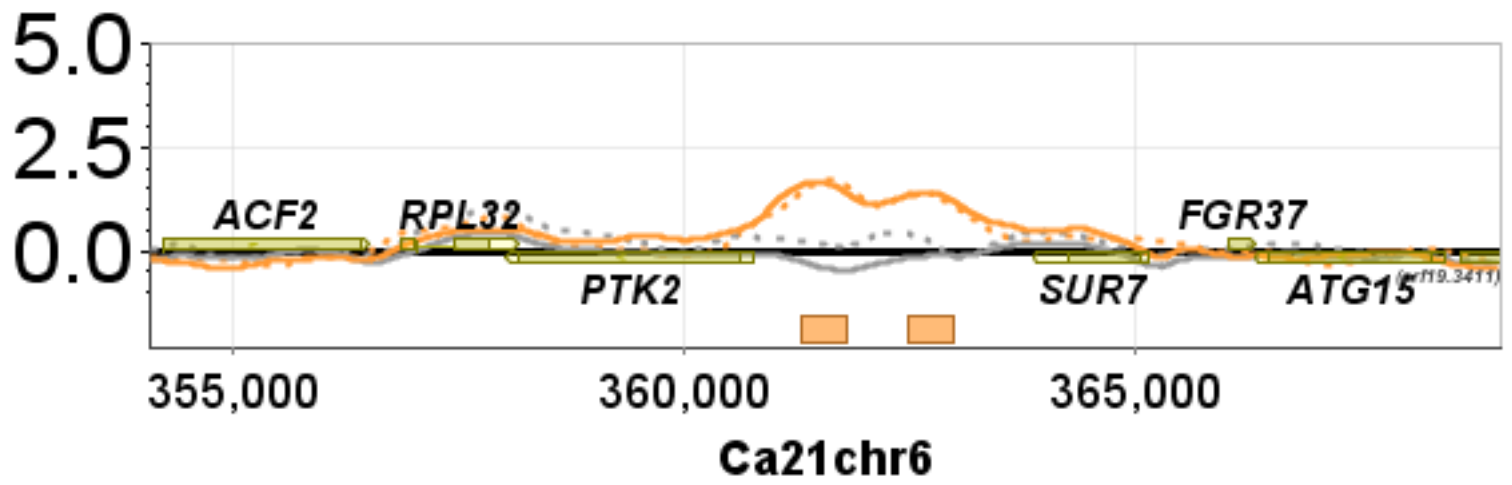

[1.698] Ca21chr1:443819-458818 [+] [GAL1, orf19.3671, GAL10, orf19.3673, ntar\_43]

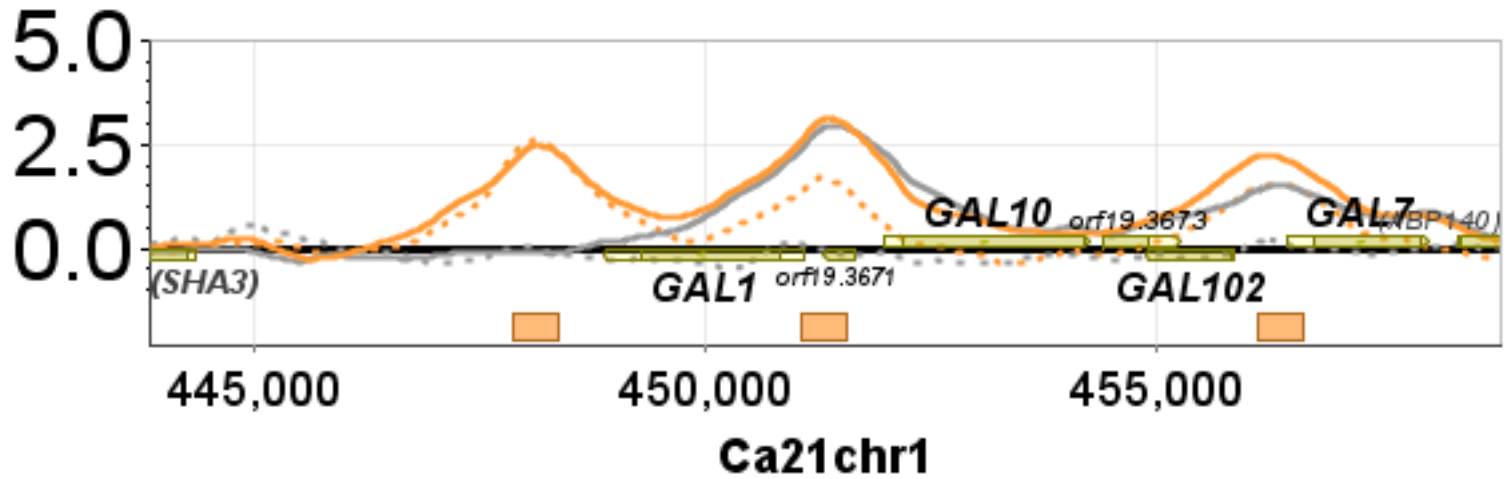

[1.698] Ca21chr1:1327545-1342544 [+] [ntar\_127, orf19.177, orf19.6280]

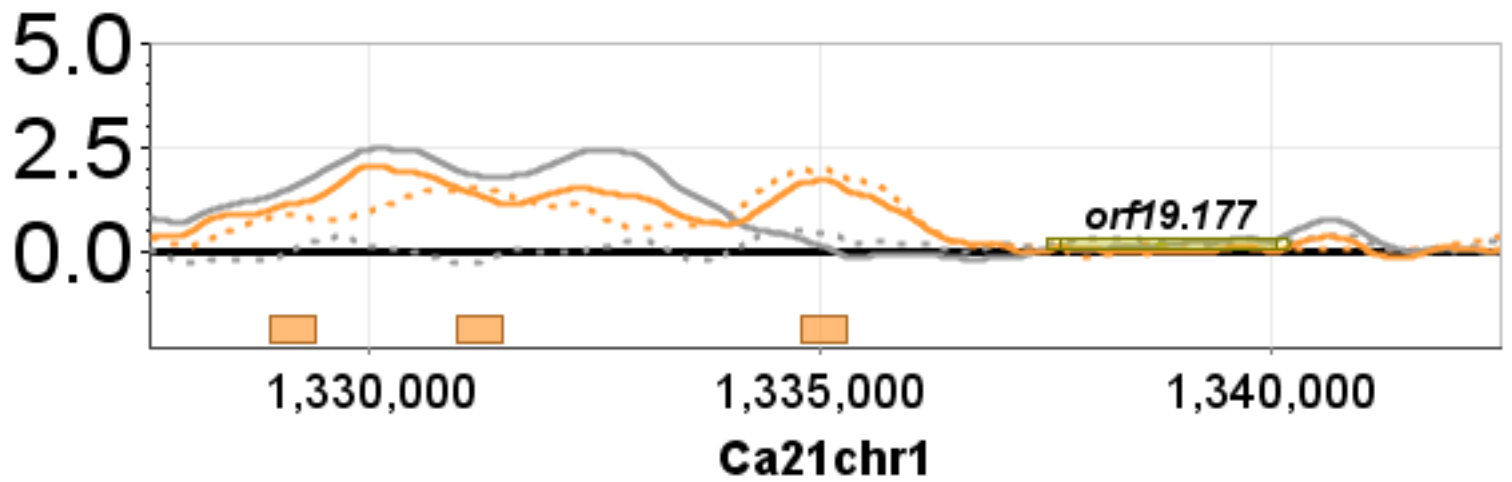

[1.672] Ca21chr3:1715248-1730247 [+] [orf19.6736, ntar\_685, orf19.6737, tf(gaa)5, tr(ucu)5]

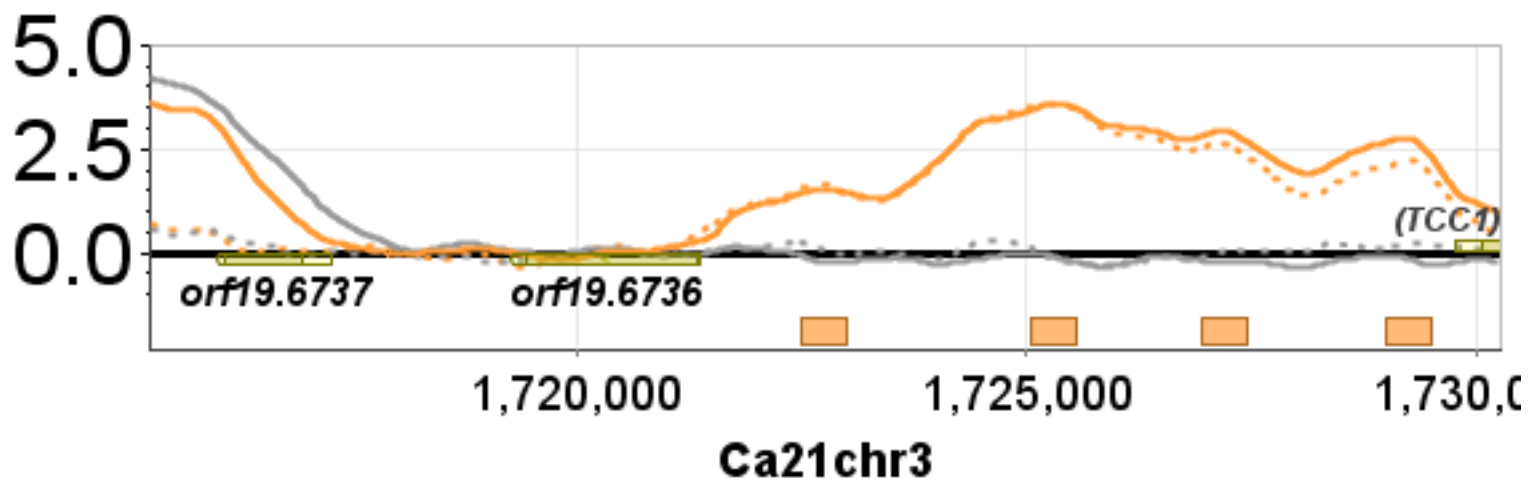



[1.663] Ca21chr1:2931847-2946846 [+] [orf19.4972, HYR1, orf19.4970]

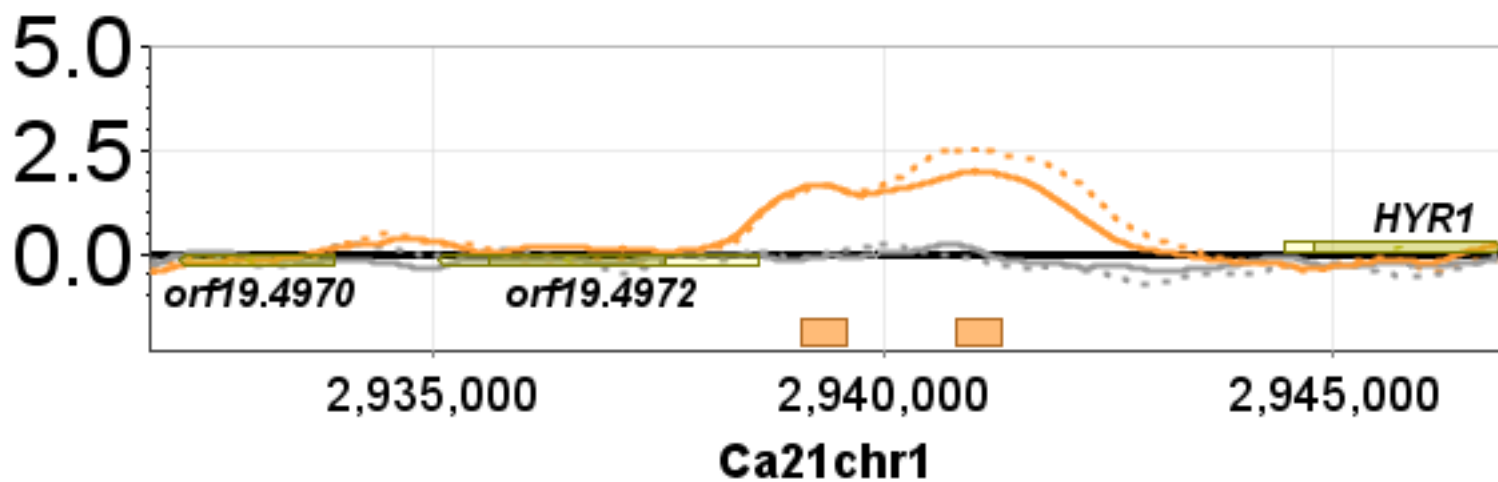

[1.658] Ca21chr1:836655-851654 [+] [orf19.4476, CSH1, KTR4, orf19.4478, orf19.4474]

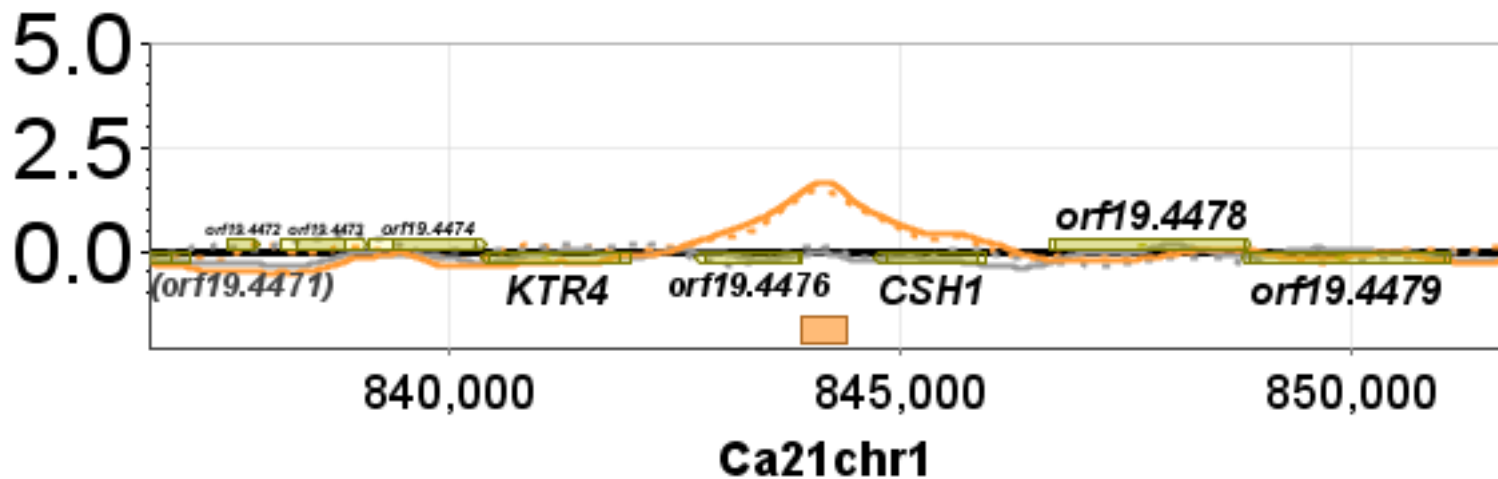

[1.654] Ca21chr1:432675-447674 [+] [HGT2, SHA3, ntar\_41, ntar\_40, ntar\_42]

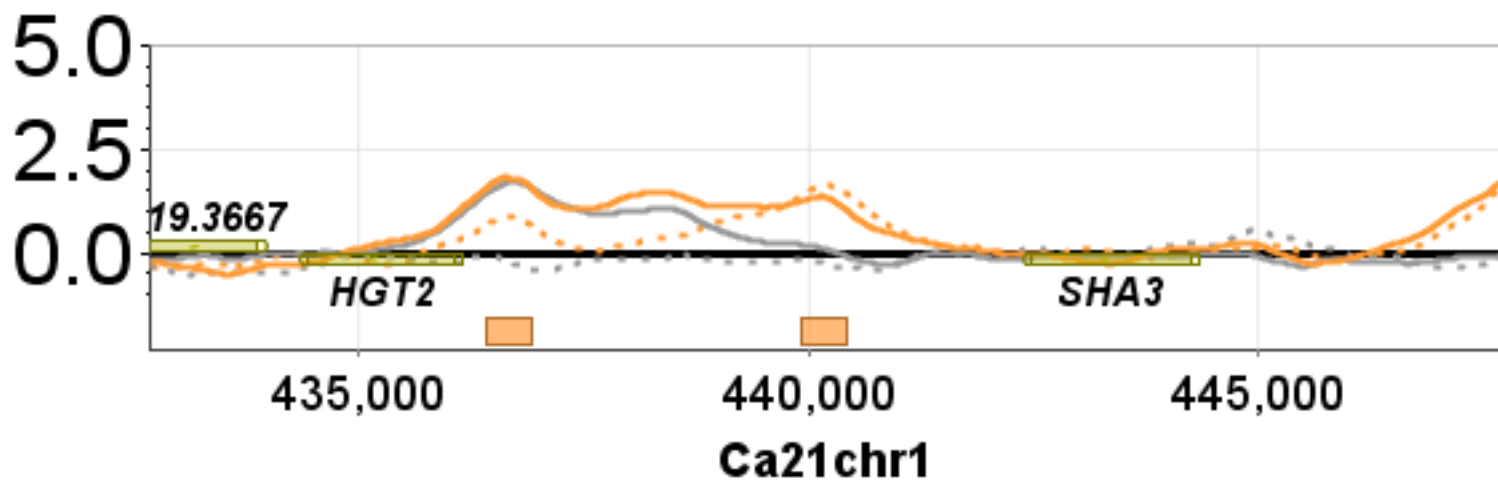

[1.649] Ca21chr1:490113-505112 [+] [orf19.3694, orf19.2925, orf19.2926, PGA5, MNN11]

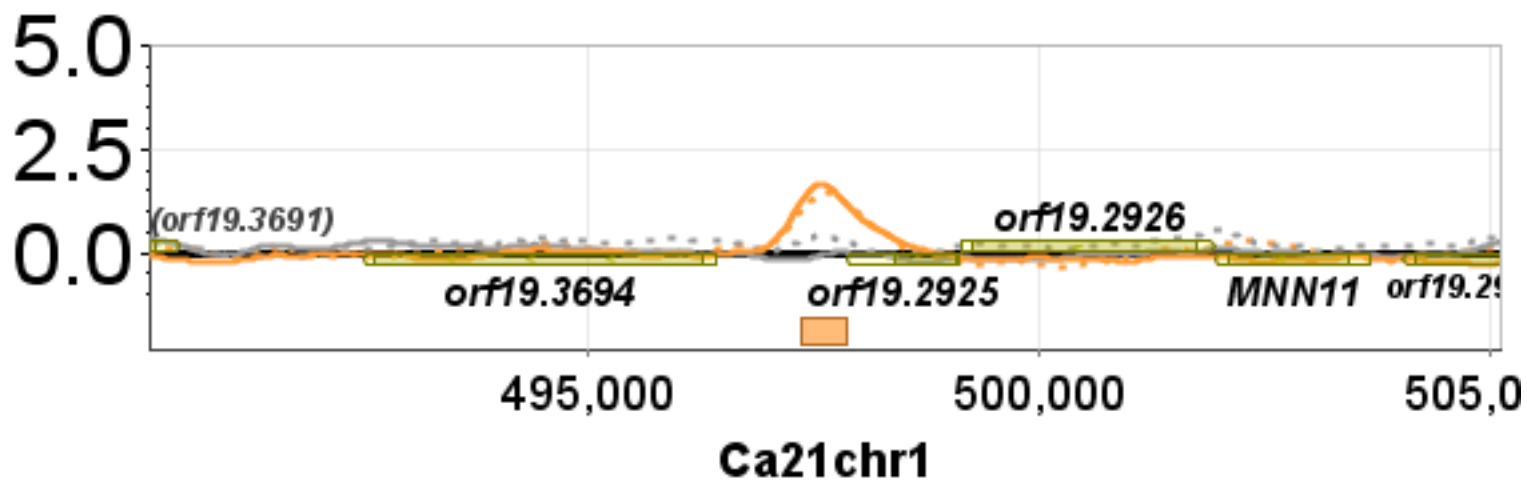

[1.649] Ca21chr3:1167950-1182949 [+] [ntar\_627, ntar\_626, orf19.6968, USO6, orf19.6966]

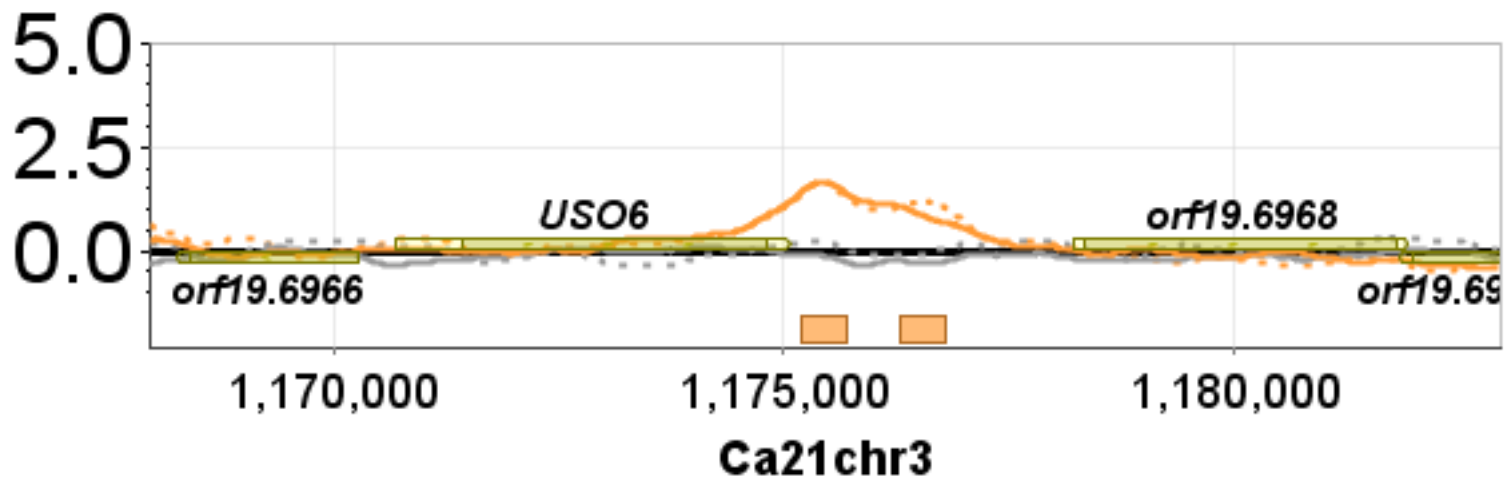

[1.649] Ca21chrR:44514-59513 [+] [orf19.7513, orf19.7512, PCK1, ntar\_1158, orf19.7511]

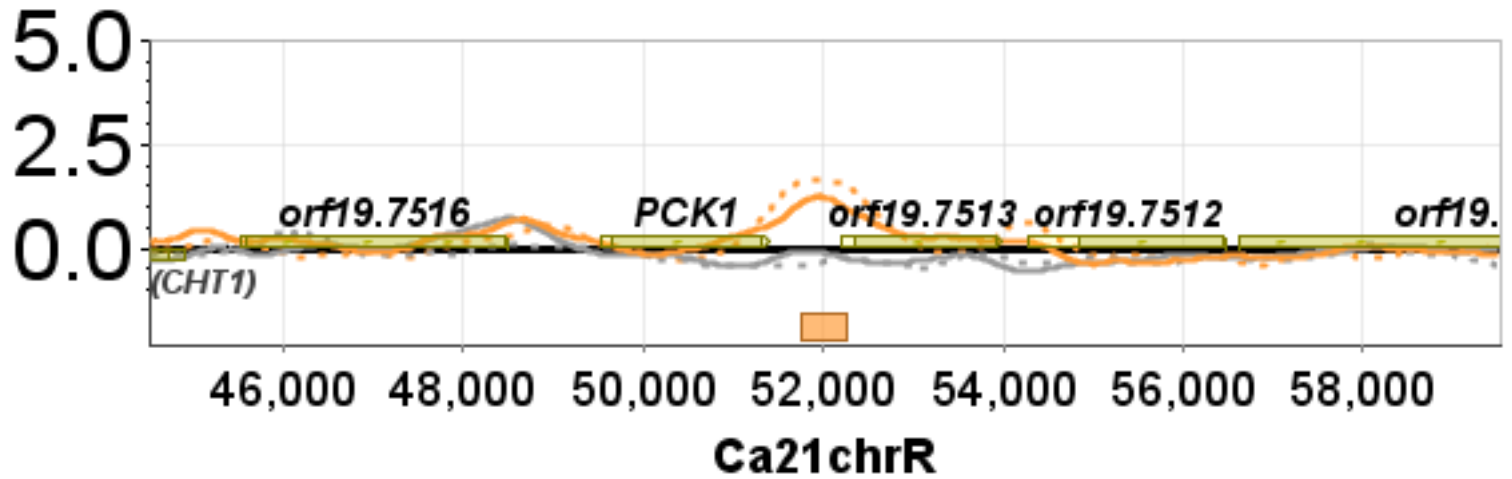

[1.644] Ca21chr6:758205-773204 [+] [orf19.5728, FGR17, orf19.5727, orf19.5725, orf19.5730]

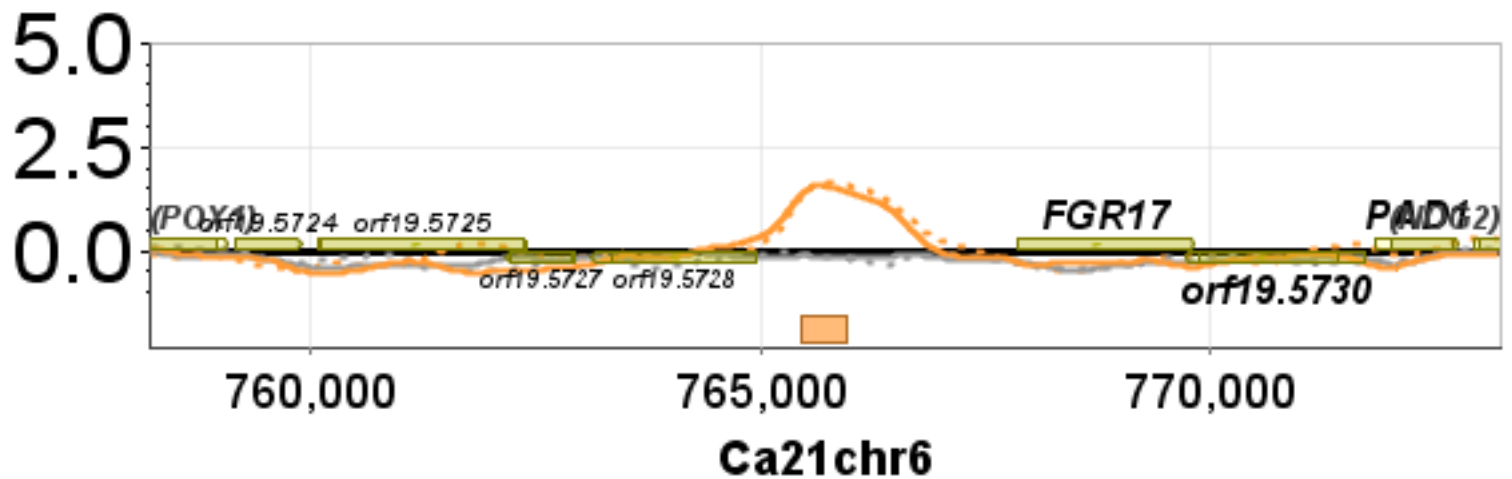

[1.618] Ca21chrR:1712162-1727161 [+] [ntar\_1352, ntar\_1353, ntar\_1351, EFG1, tg(gcc)1]

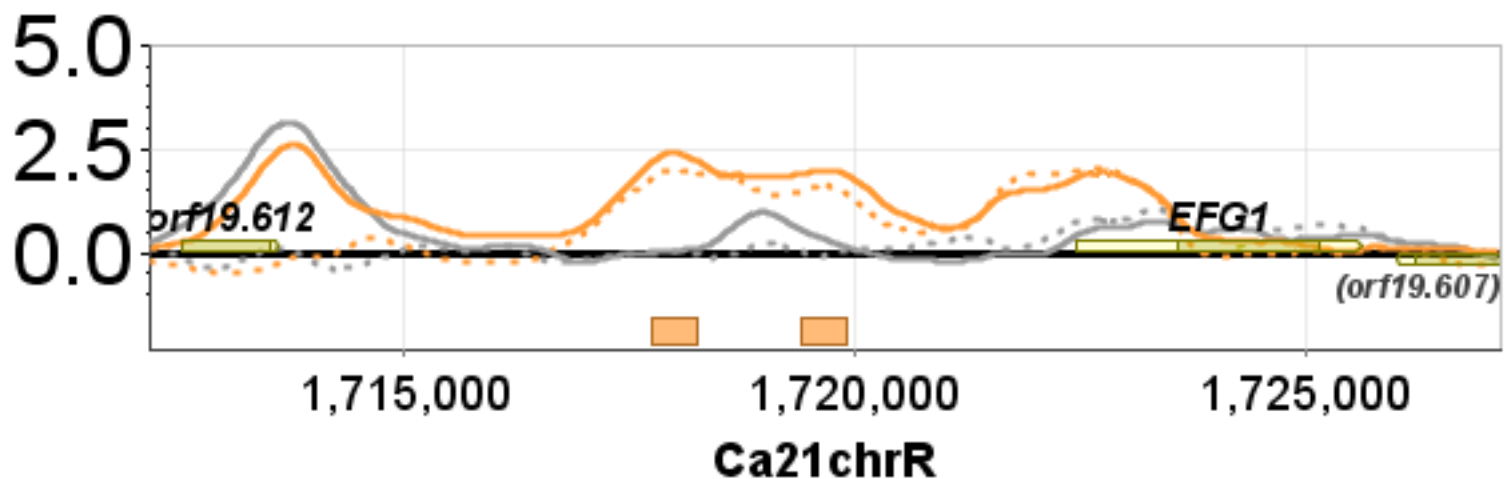

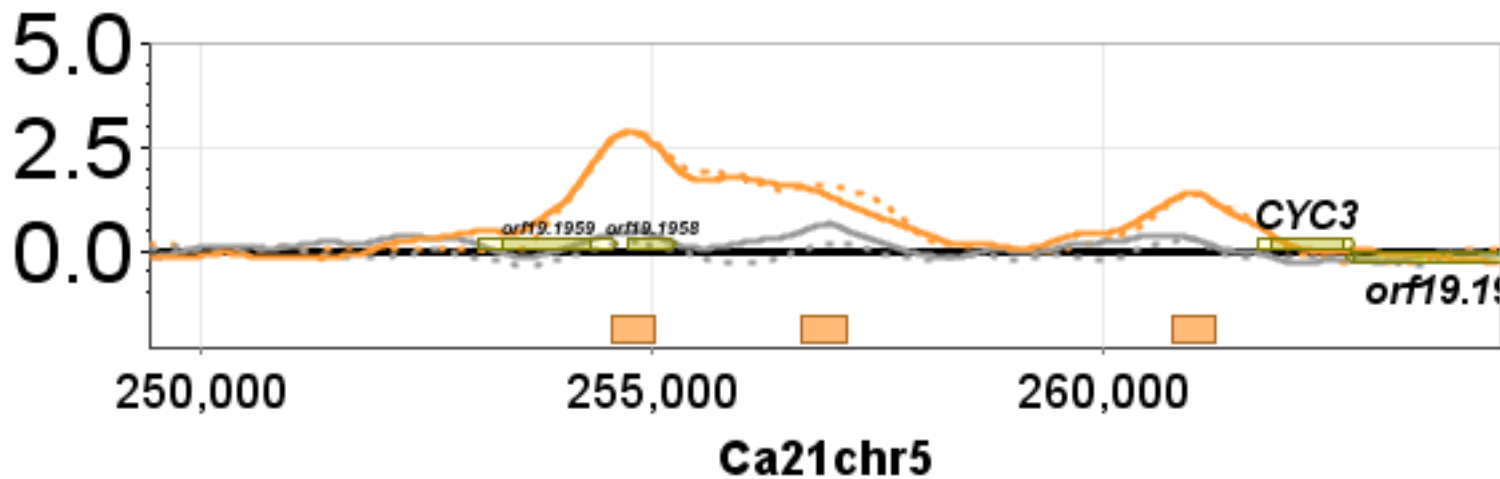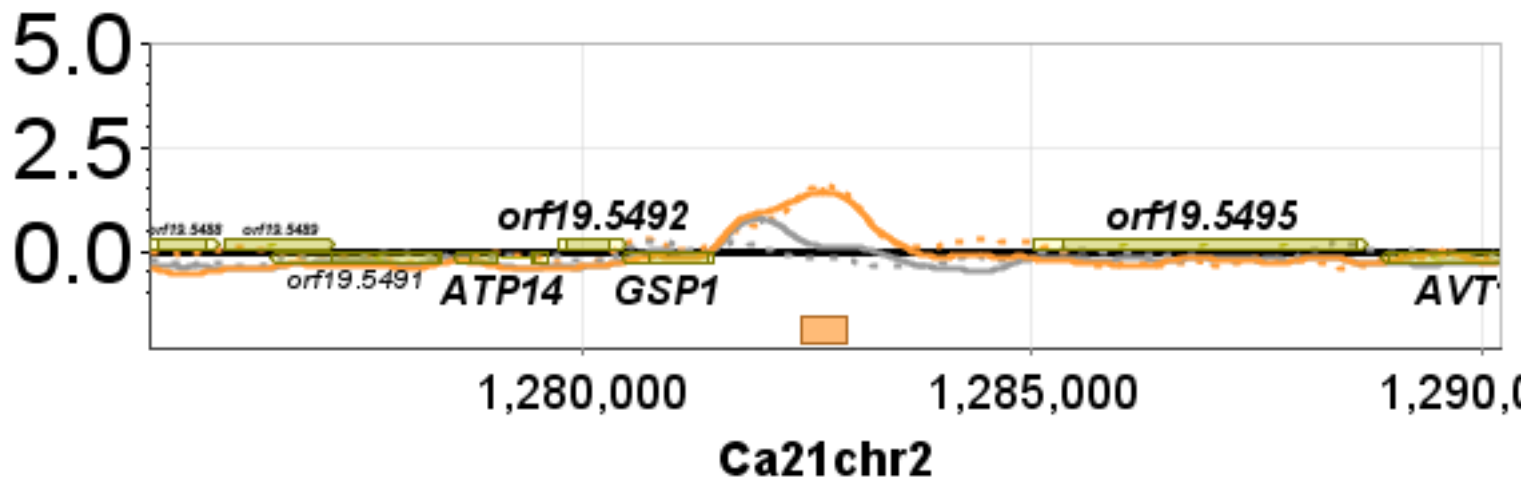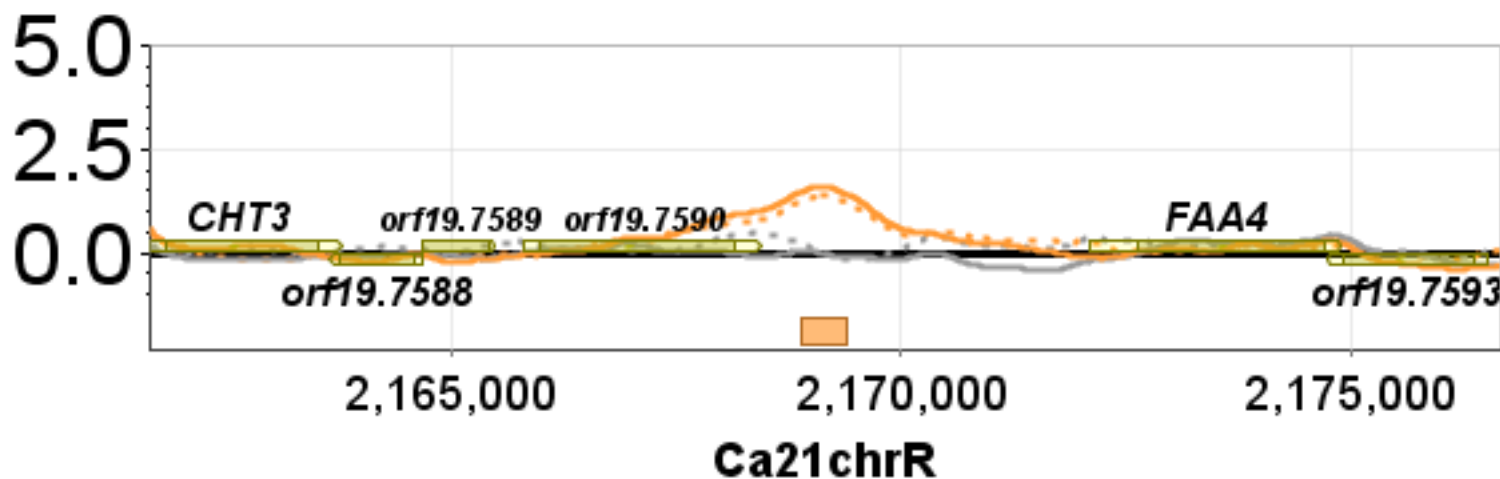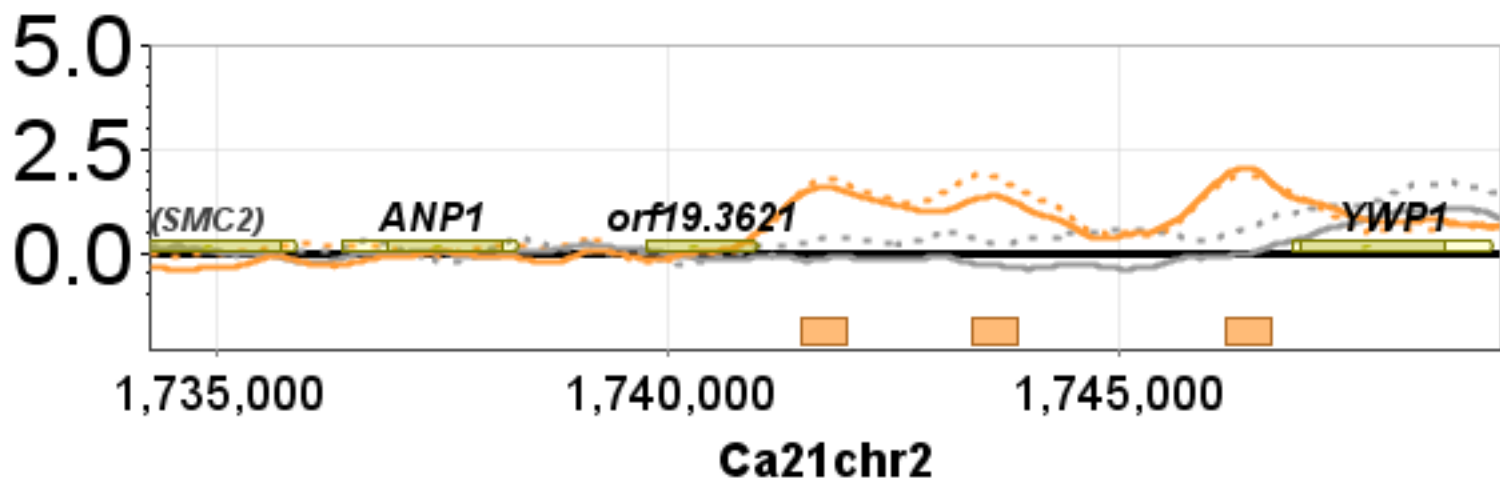

[1.588] Ca21chr4:282575-297574 [+] [UEC1, ntar\_739, ntar\_740, BEM1, HAP3]

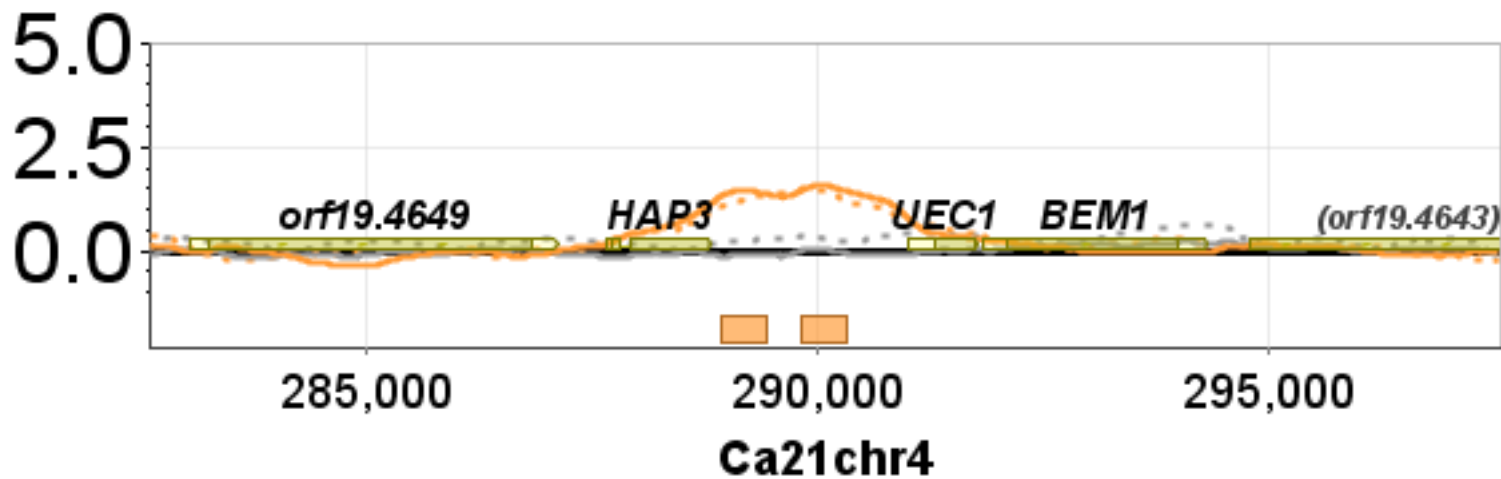

[1.582] Ca21chr5:1108288-1123287 [+] [orf19.4000, orf19.4001, orf19.3999, orf19.3998, ADH1]

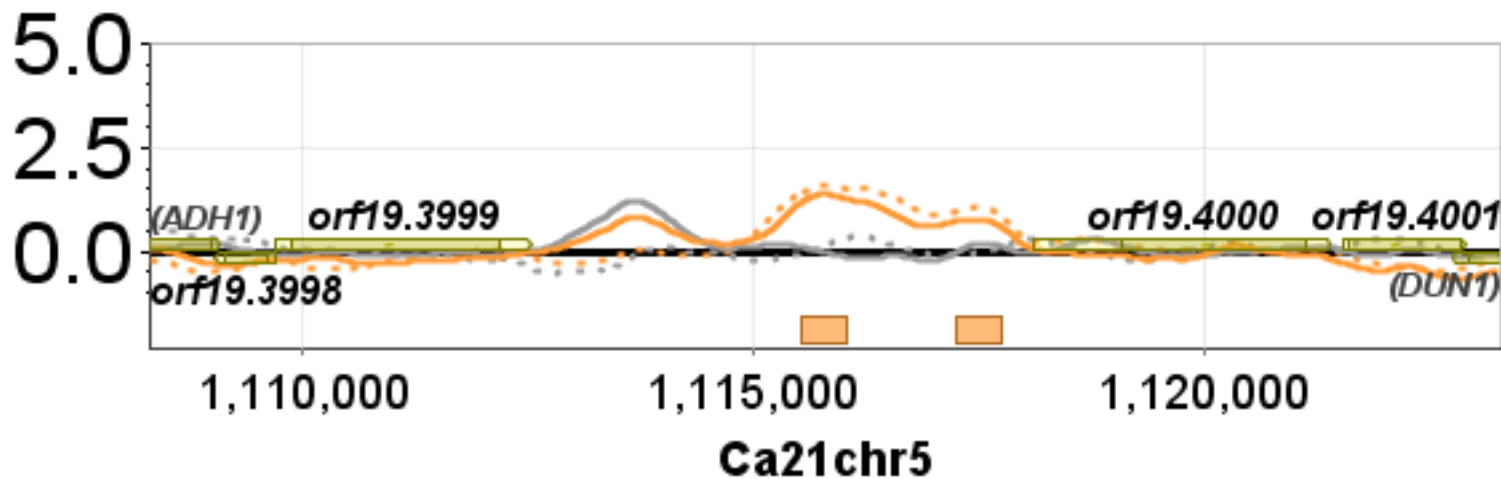

[1.573] Ca21chrR:1521381-1536380 [+] [ntar\_1331, CRZ2, URA2, ALS3, ntar\_1332]

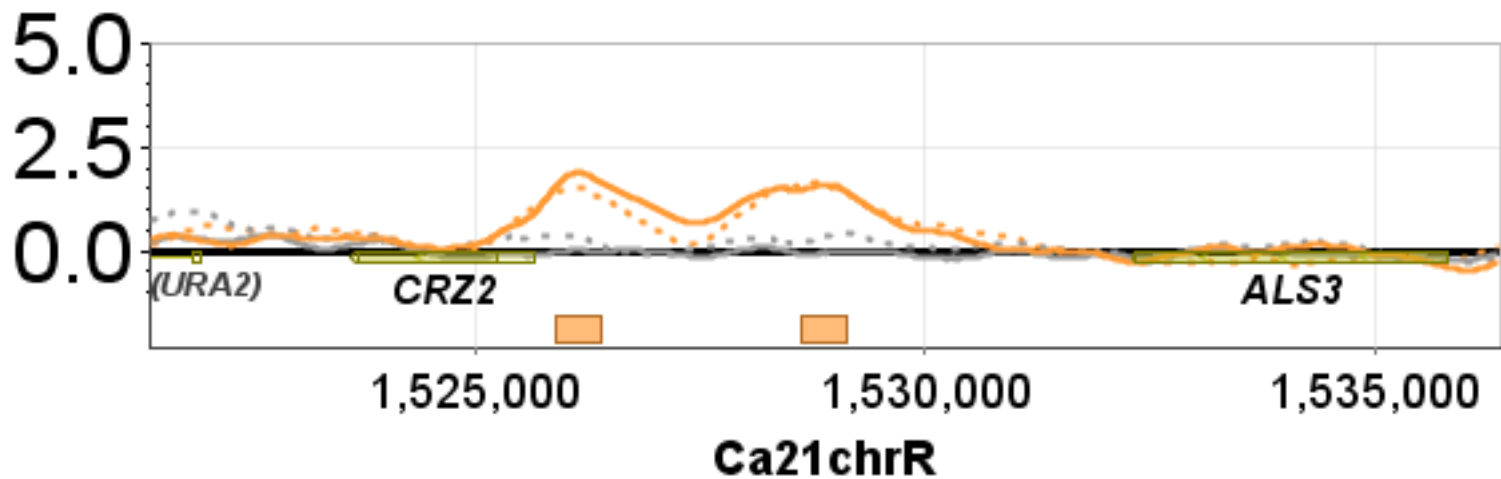

[1.57] Ca21chr1:532069-547068 [+] [PUT4, HNM4, ntar\_58, ntar\_57, ntar\_56]

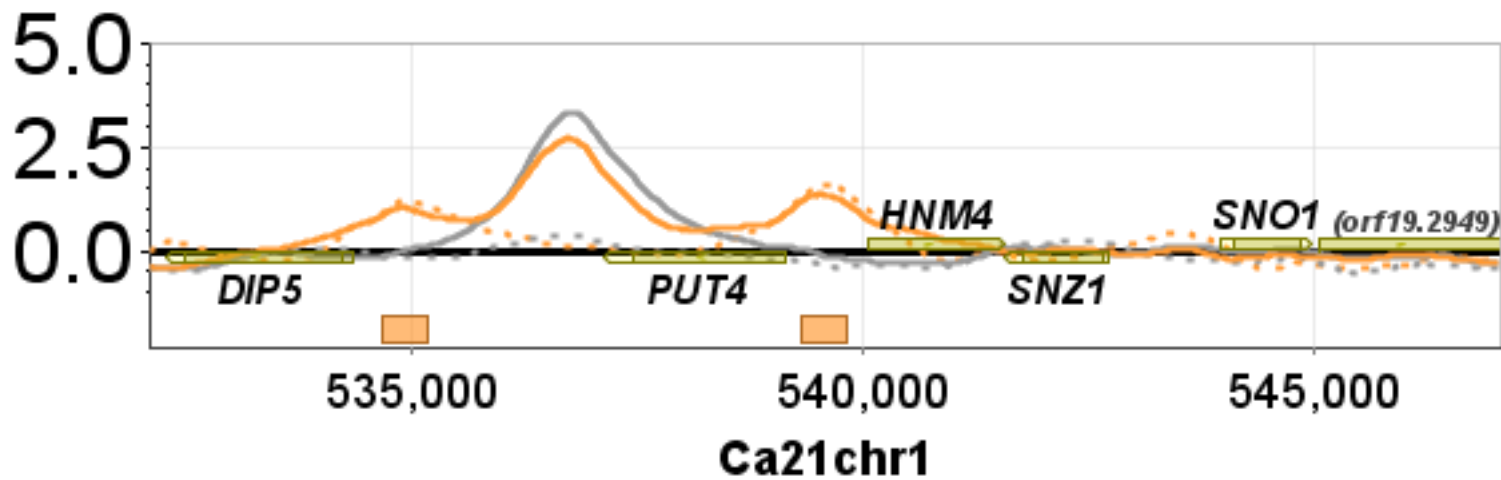

[1.565] Ca21chr3:1110663-1125662 [+] [WOR2, ntar\_614, ntar\_615, ntar\_616, ntar\_617]

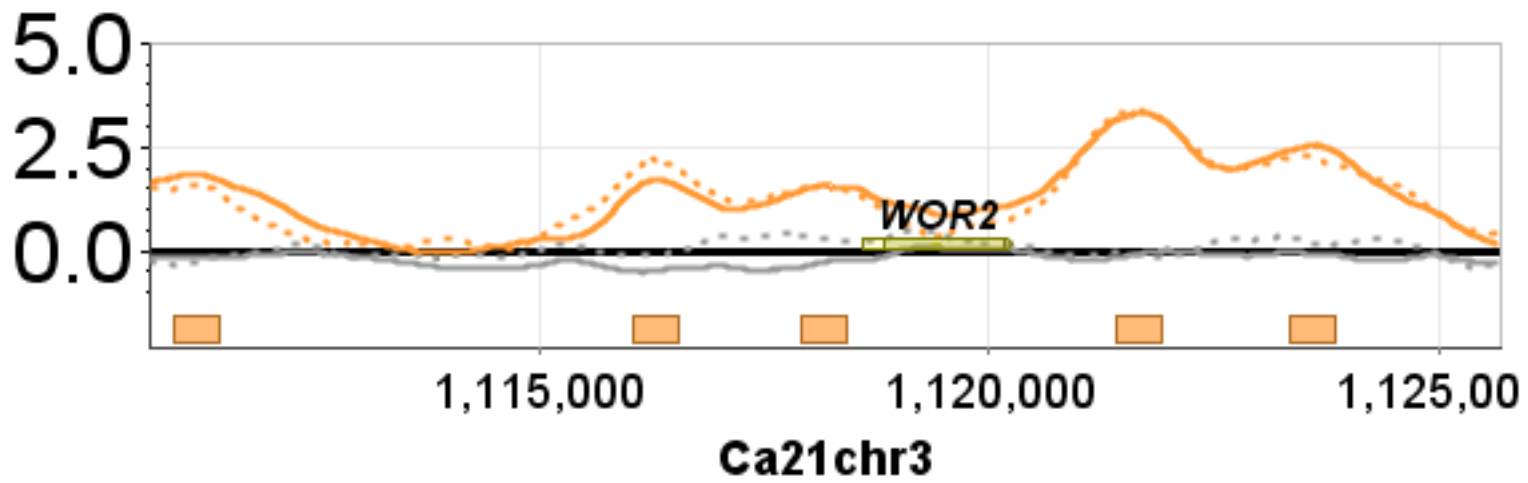

[1.565] Ca21chrR:1471489-1486488 [+] [orf19.1842, ALG6, ntar\_1329, ts(aqa)2, orf19.1841]

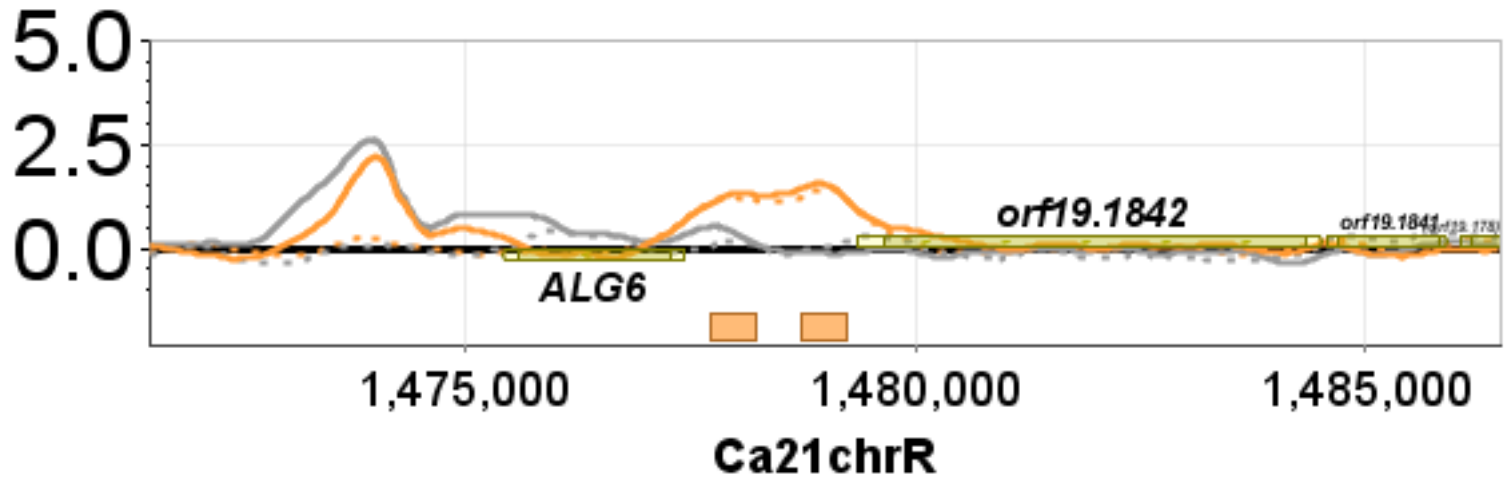

[1.562] Ca21chr2:772192-787191 [+] [orf19.851, orf19.850, SAP98, orf19.849, SAP99]

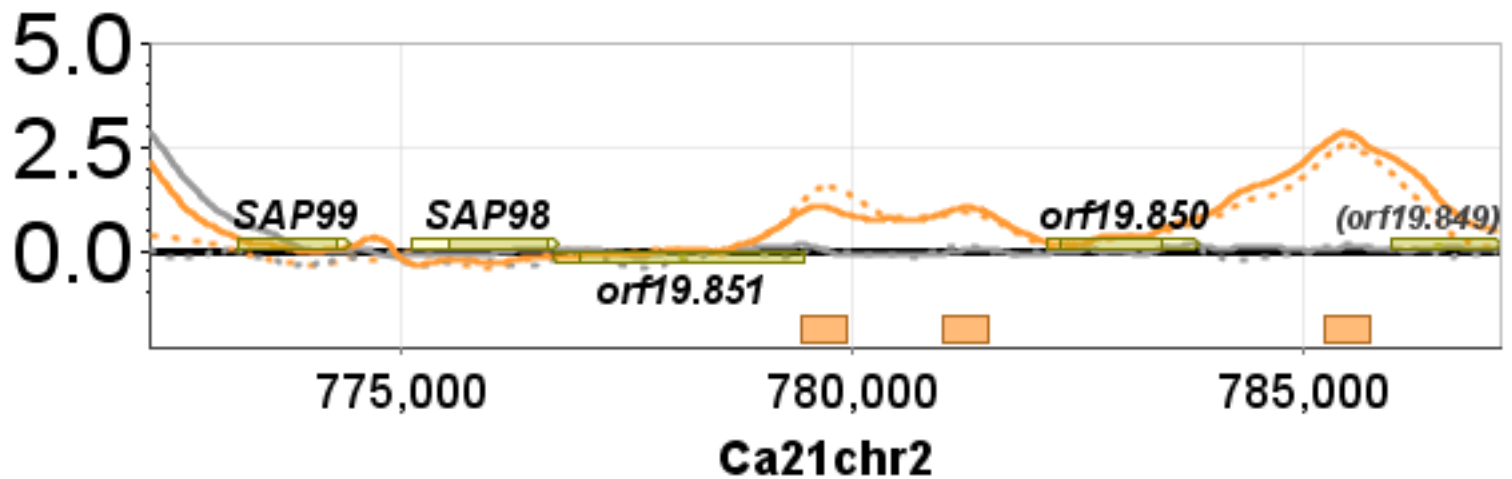

[1.55] Ca21chr1:2098061-2113060 [+] [ntar\_198, orf19.4819, orf19.4820, orf19.4818, ntar\_197]

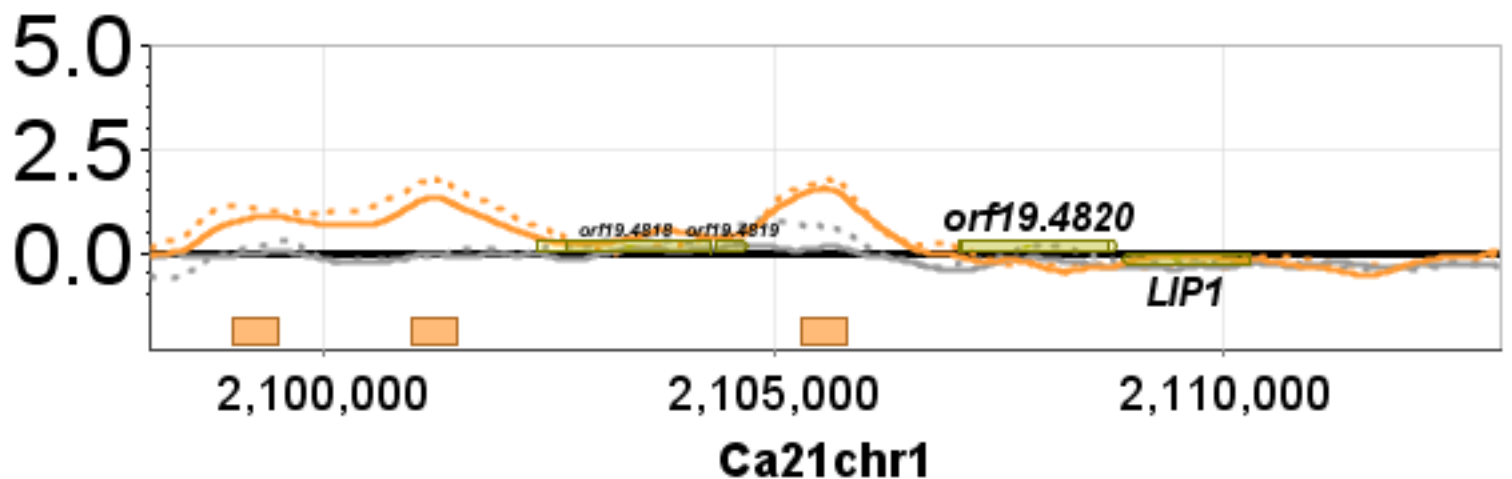

[1.544] Ca21chr4:835591-850590 [+] [ntar\_789, ntar\_788, PYC2, orf19.787, orf19.787.1]

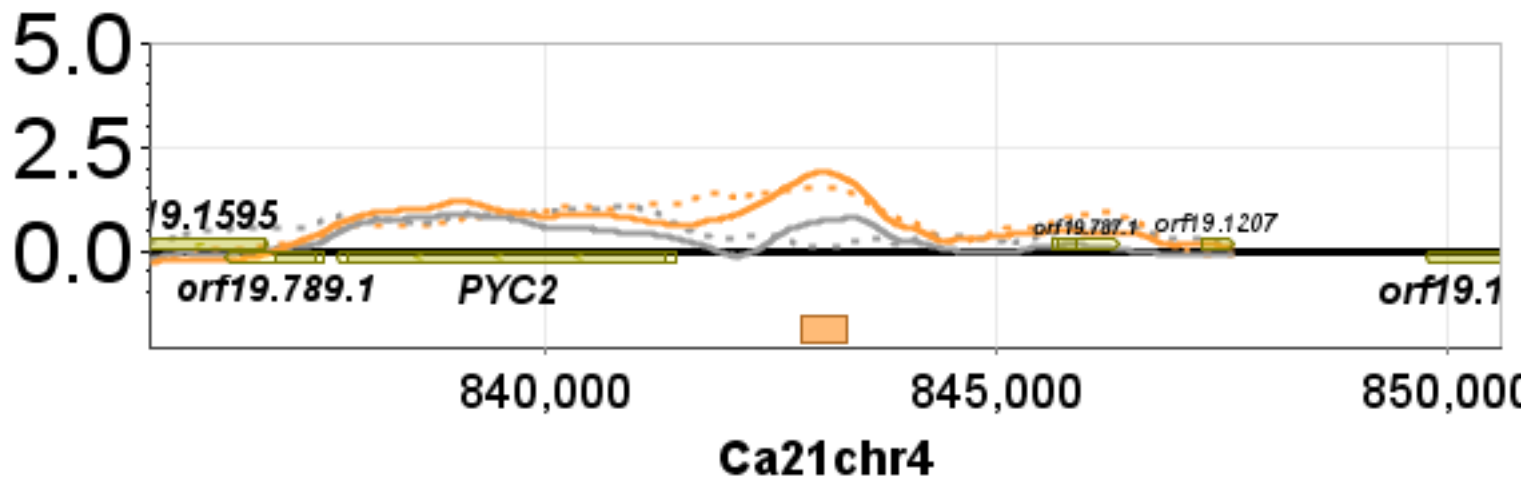

[1.543] Ca21chr5:915107-930106 [+] [CHT2, orf19.3897, orf19.3894, ntar\_941, orf19.3898]

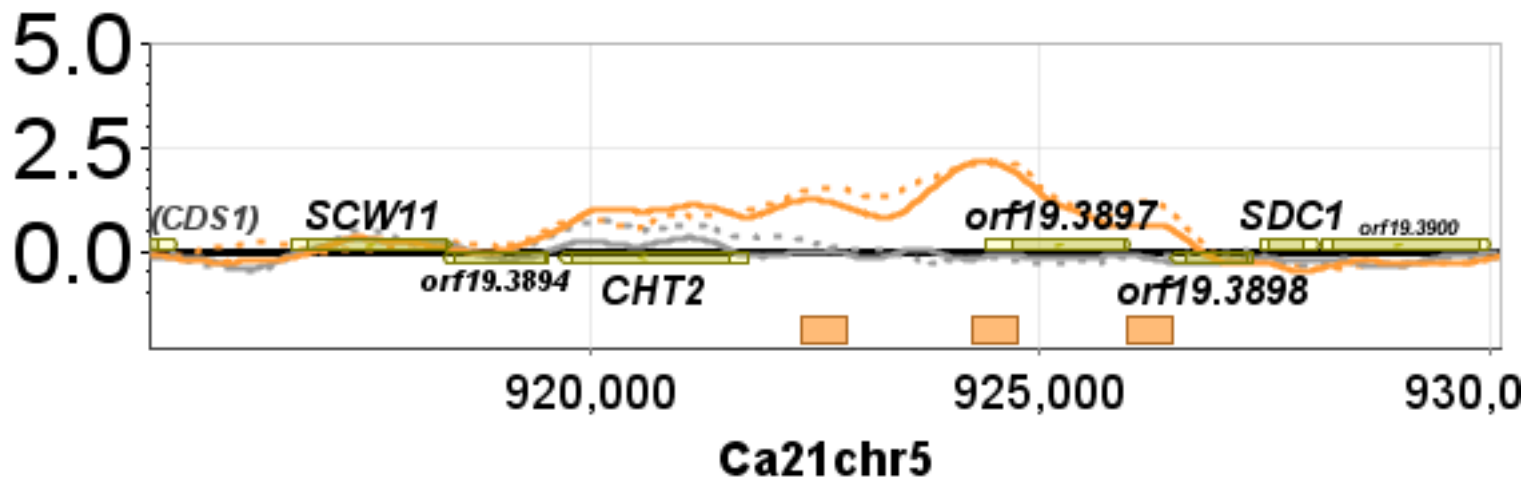

[1.54] Ca21chr3:1146850-1161849 [+] [RPL8B, orf19.6003, ntar\_620, SAP3, ntar\_621]

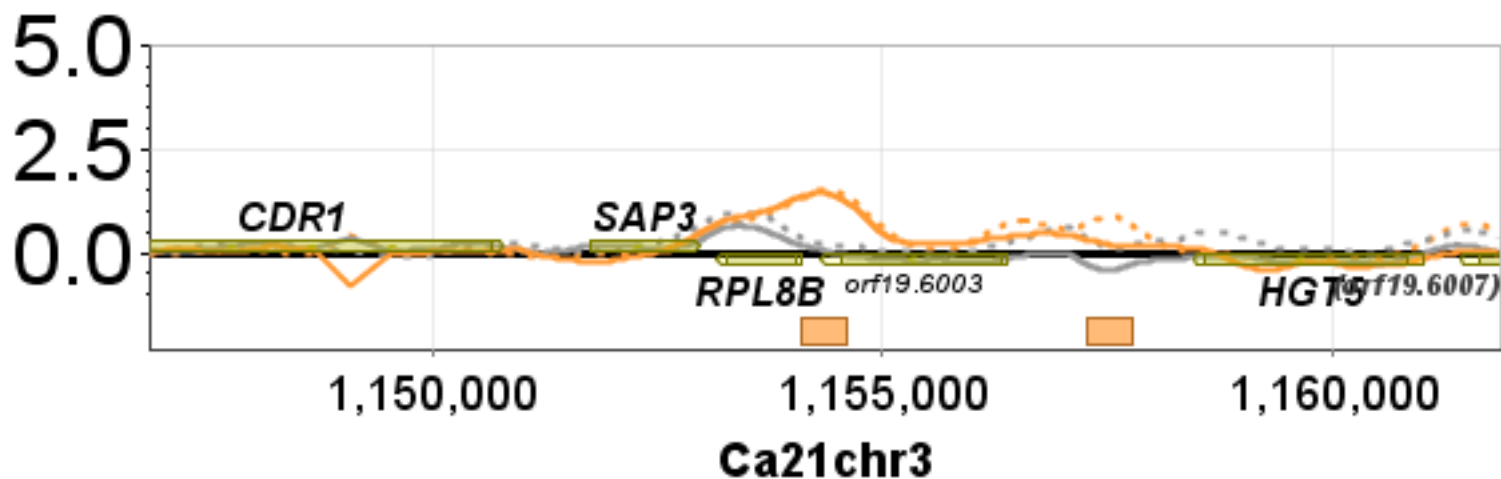

[1.532] Ca21chr1:448890-463889 [+] [GAL7, GAL102, ABP140, orf19.3673, orf19.3677]

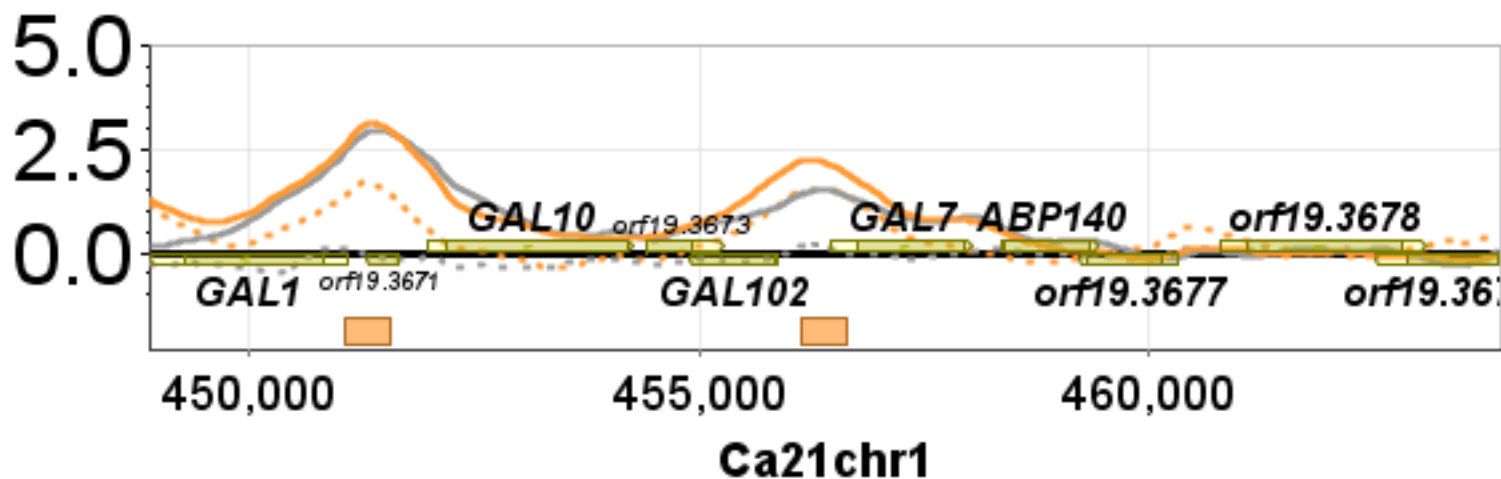

[1.532] Ca21chr1:1323717-1338716 [+] [ntar\_127, orf19.177, orf19.1821]

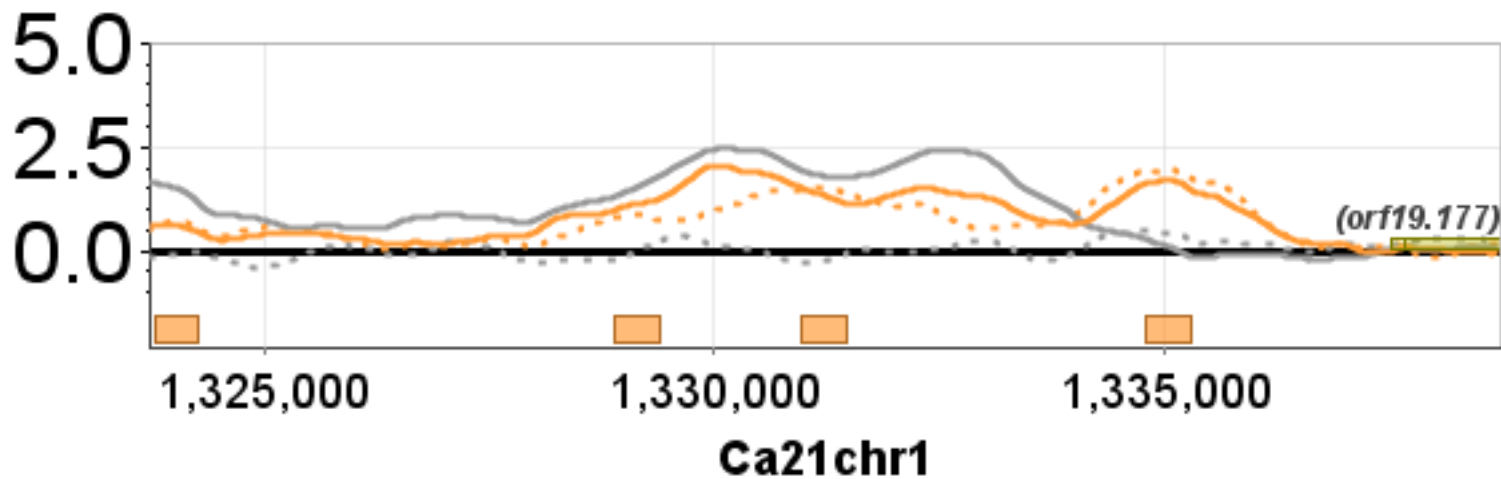

[1.532] Ca21chr6:29586-44585 [+] [ntar\_969, orf19.1189, CPH2, ntar\_968, orf19.1186]

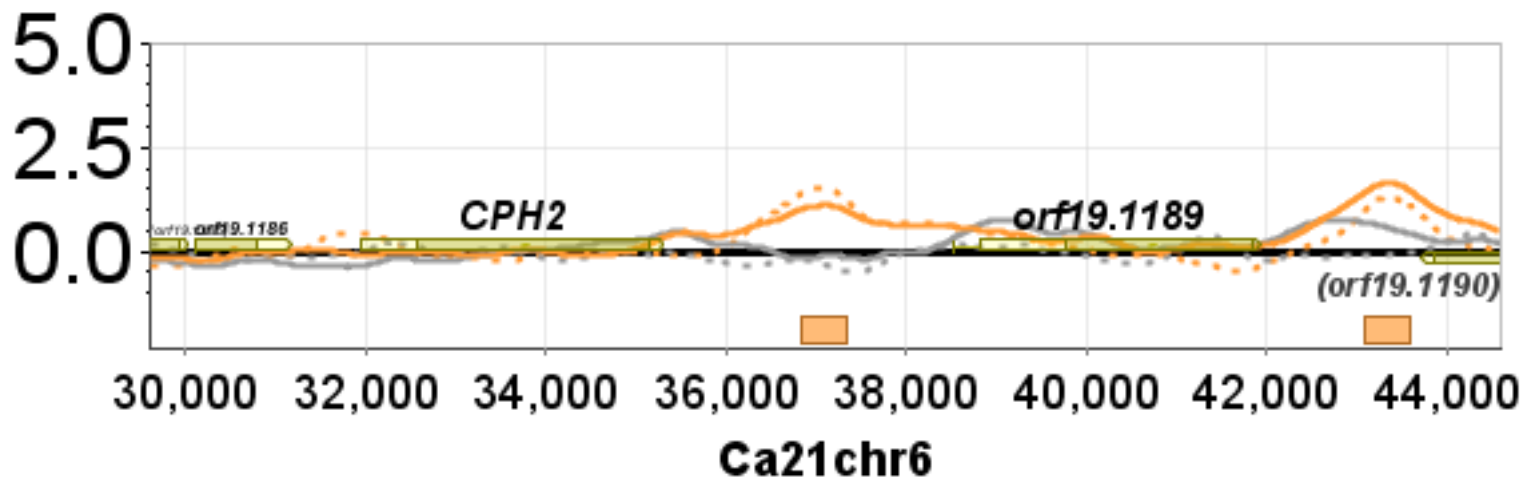

[1.525] Ca21chr1:2044896-2059895 [+] [orf19.4792, ntar\_195, orf19.4793, orf19.4791, orf19.4789]

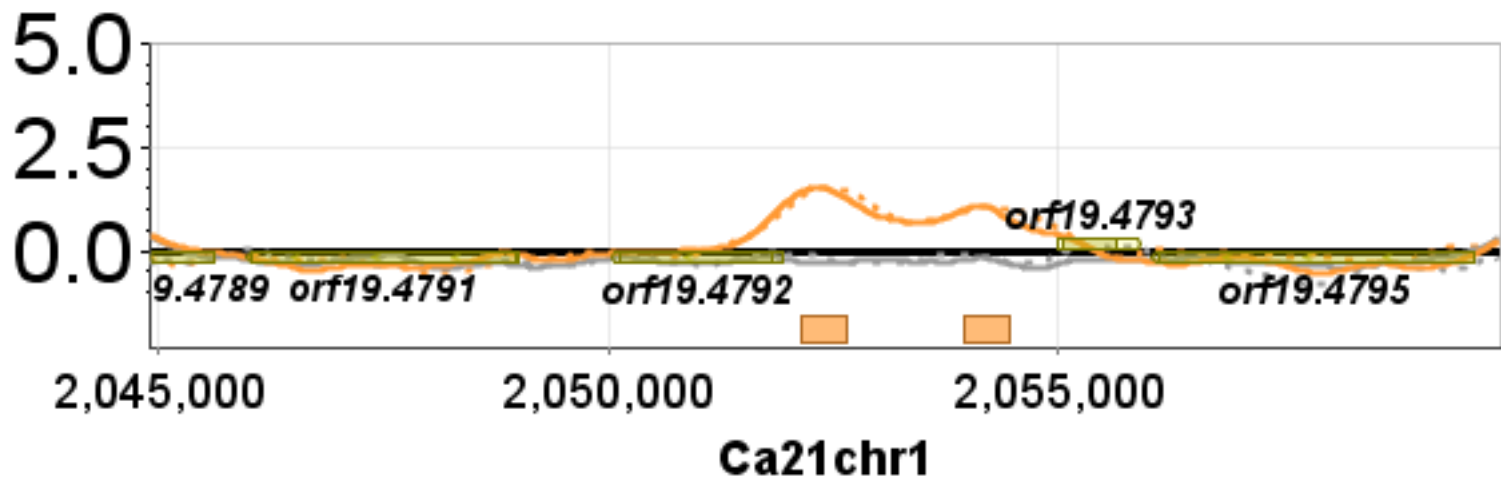

[1.524] Ca21chr1:3143568-3158567 [+] [orf19.7239, NPL3, NCR1, orf19.7243, orf19.7237]

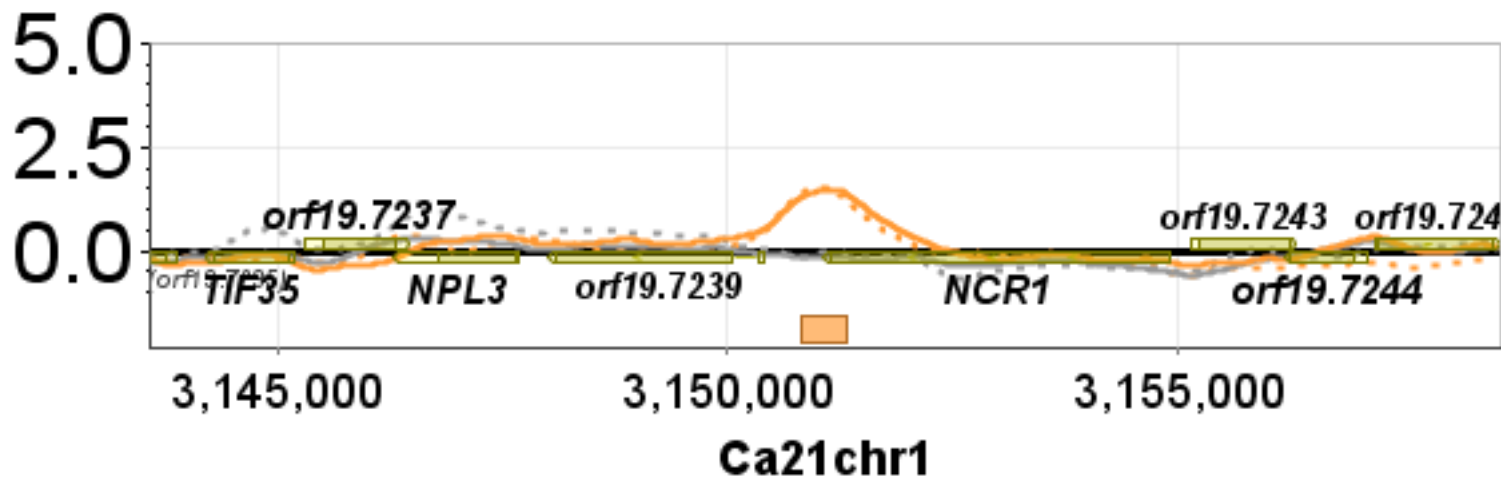

[1.52] Ca21chrR:792077-807076 [+] [VTC3, ntar\_1247, ntar\_1248, orf19.4382, orf19.4380.1]

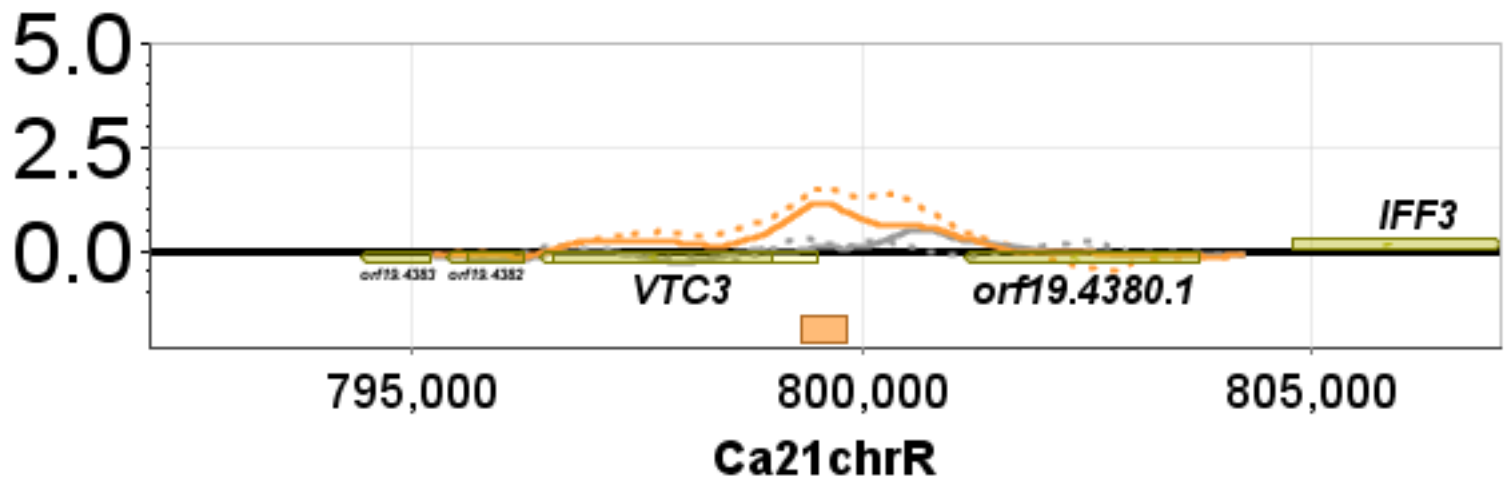

[1.509] Ca21chr2:1137934-1152933 [+] [ts(aqa)4, orf19.6873.1, RPS8A, orf19.6874, ntar\_395]

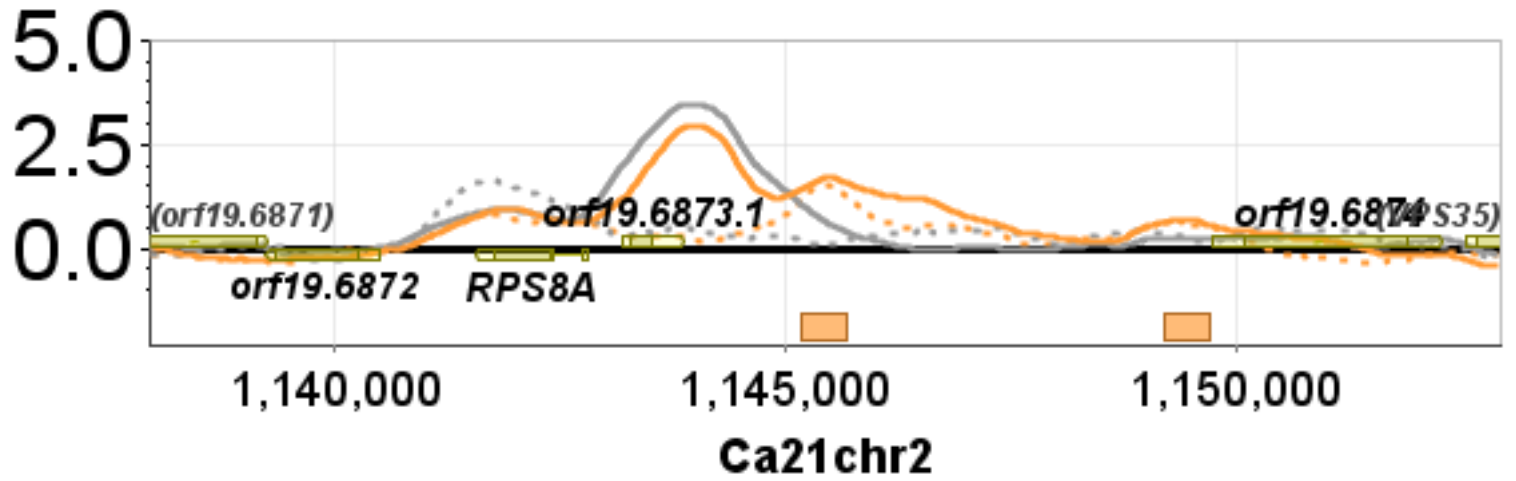

[1.509] Ca21chrR:548721-563720 [+] [ntar\_1215, ntar\_1216, orf19.173, ntar\_1213, ntar\_1214]

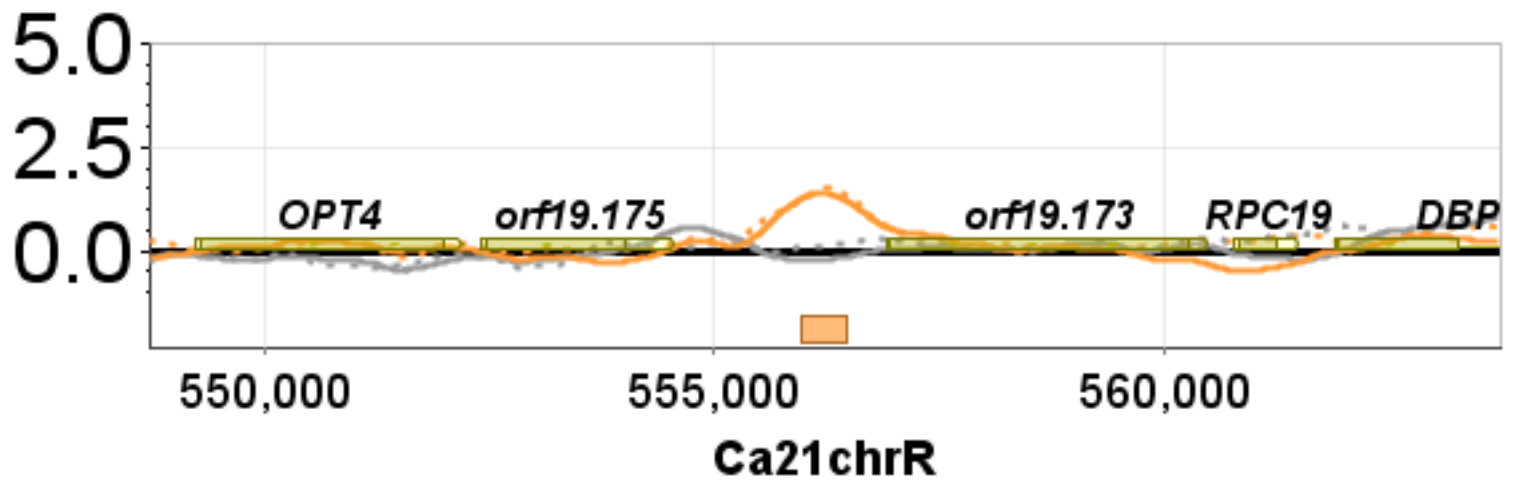

[1.502] Ca21chr5:295381-310380 [+] [CFL4, orf19.1933, orf19.1934, CFL5, orf19.1935]

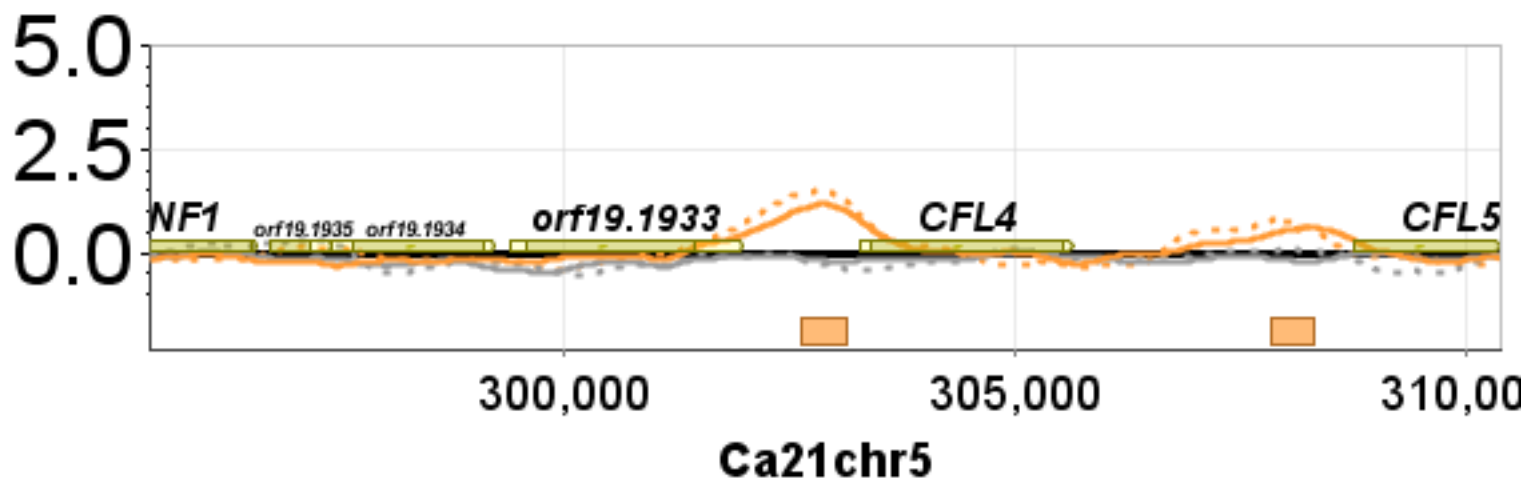



[1.5] Ca21chr3:121139-136138 [+] [ntar\_532, ntar\_533, ntar\_531, ntar\_534, PMA1]

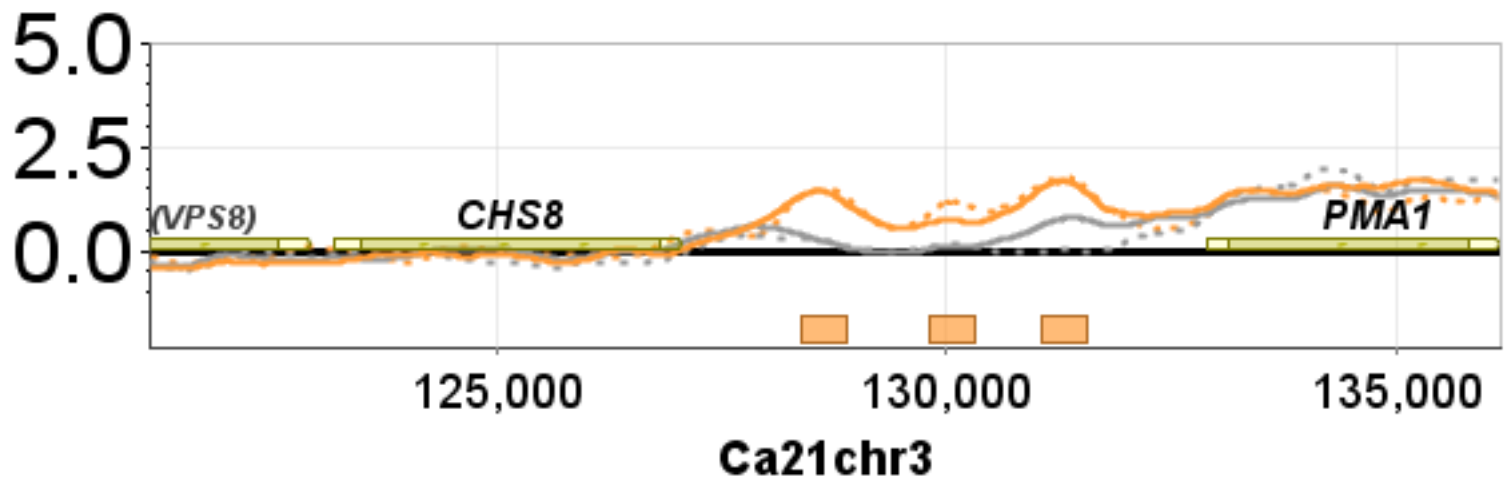

[1.494] Ca21chrR:1697098-1712097 [+] [orf19.3713, orf19.3712, orf19.3714, orf19.3711, ASF1]

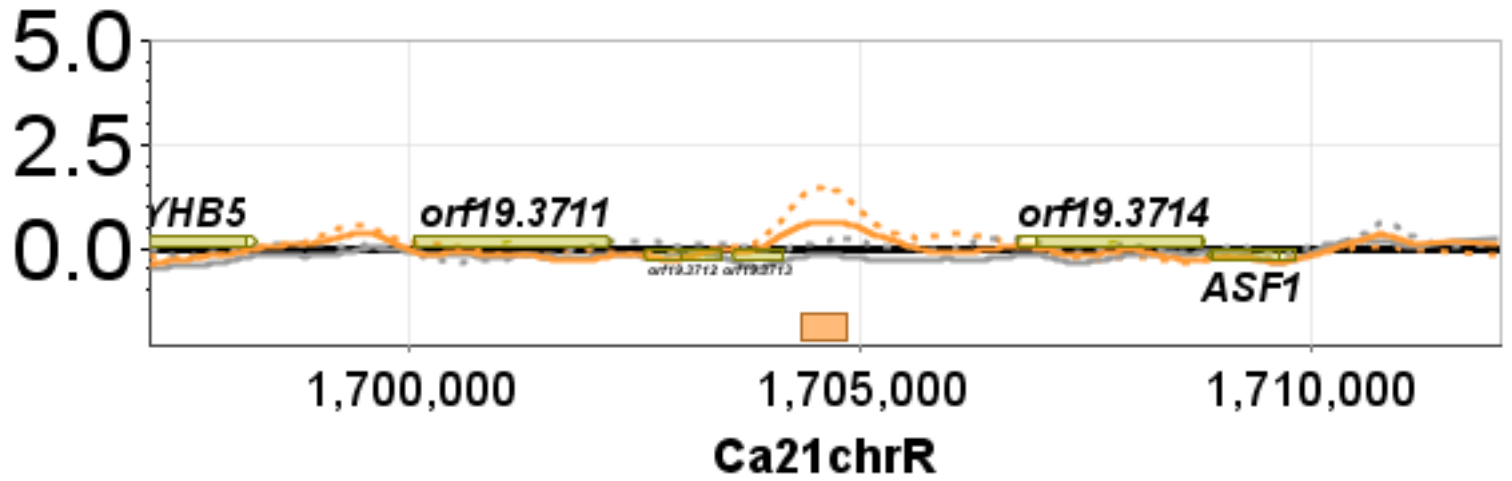

[1.488] Ca21chr5:156170-171169 [+] [IFF8, SPE2, TFB3, RMT2, HYR3]

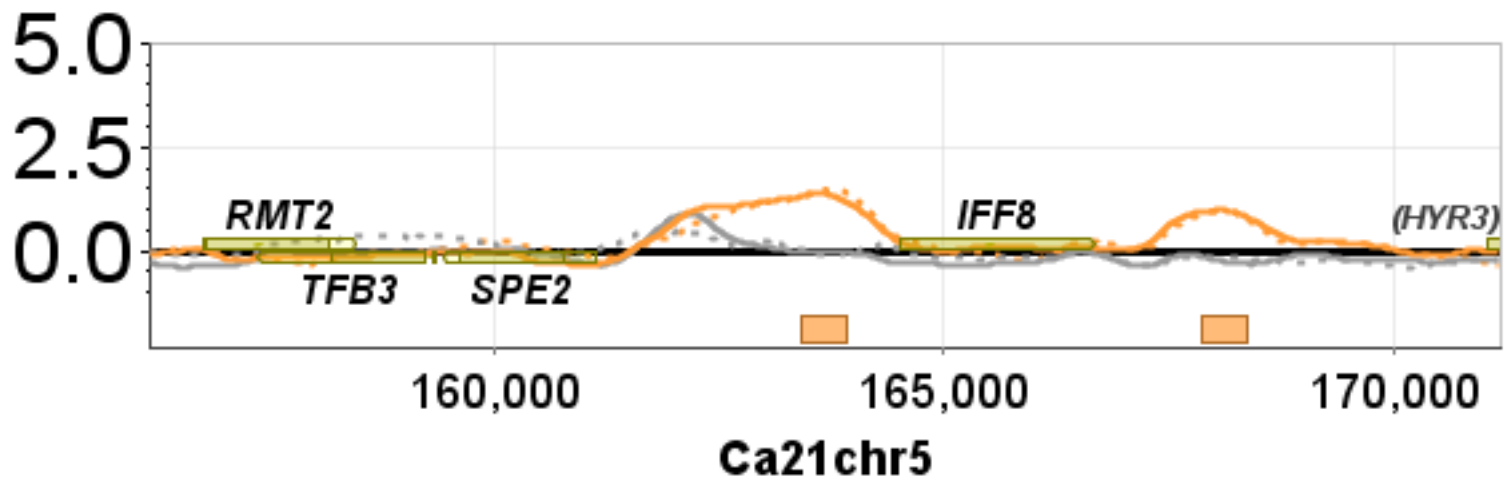

[1.486] Ca21chrR:2109597-2124596 [+] [DPB2, GNP3, BET2, orf19.7566]

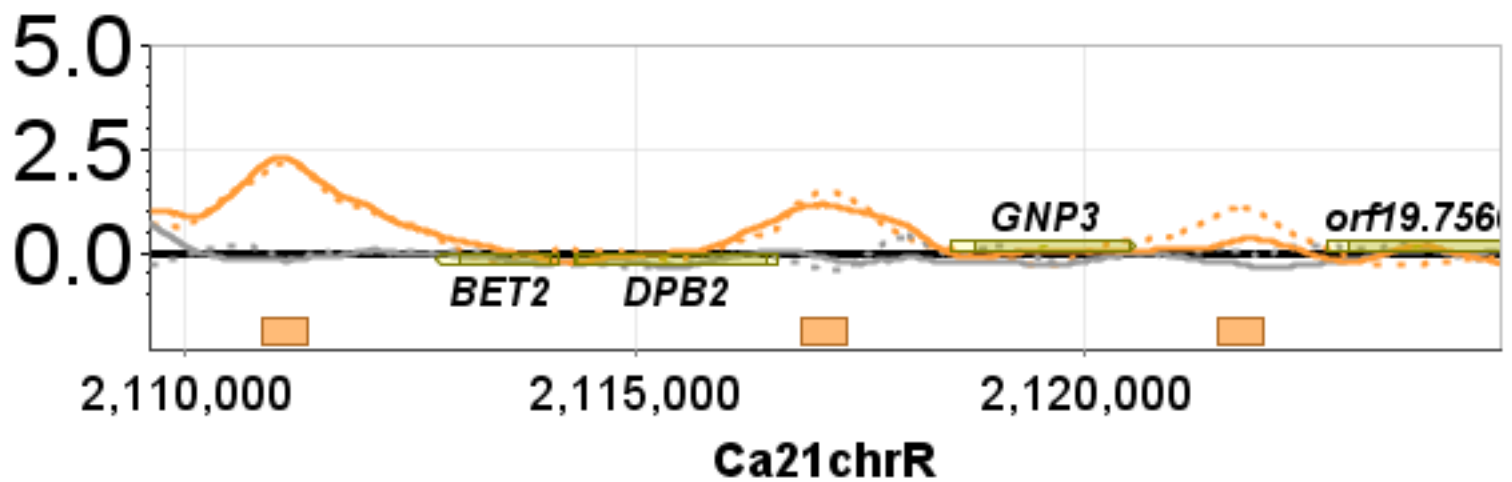

[1.486] Ca21chrR:2197391-2212390 [+] [PTP3, ntar\_1407, PGA11, orf19.7608, TRX1]

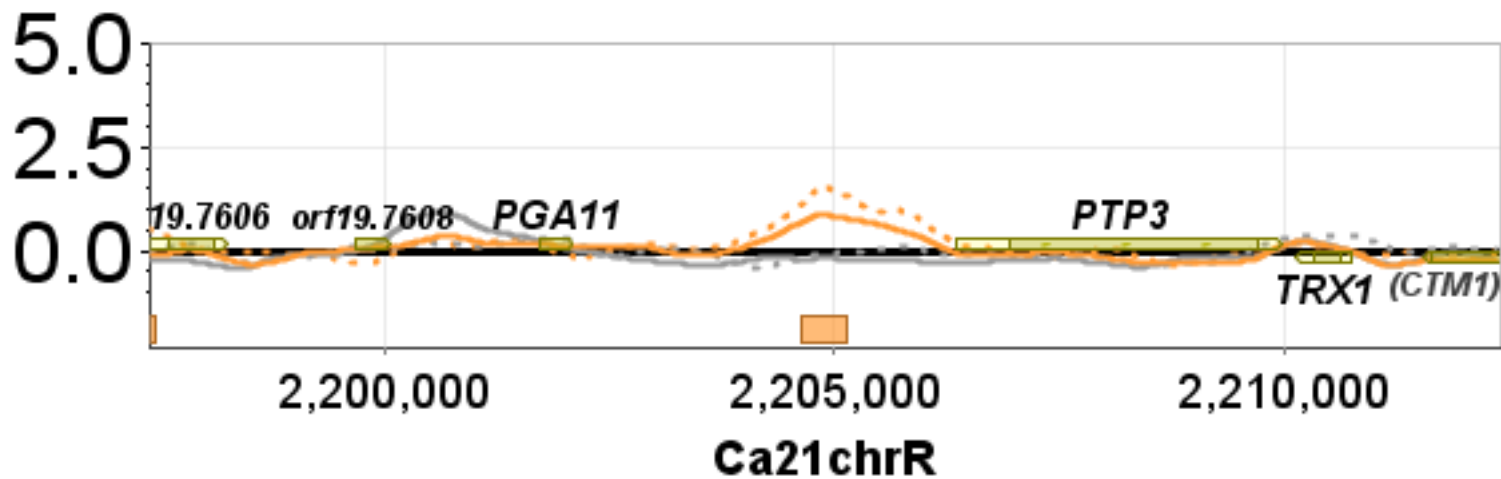

[1.478] Ca21chr2:516347-531346 [+] [ZRT2, ntar\_335, ntar\_334, FGR22, orf19.1584]

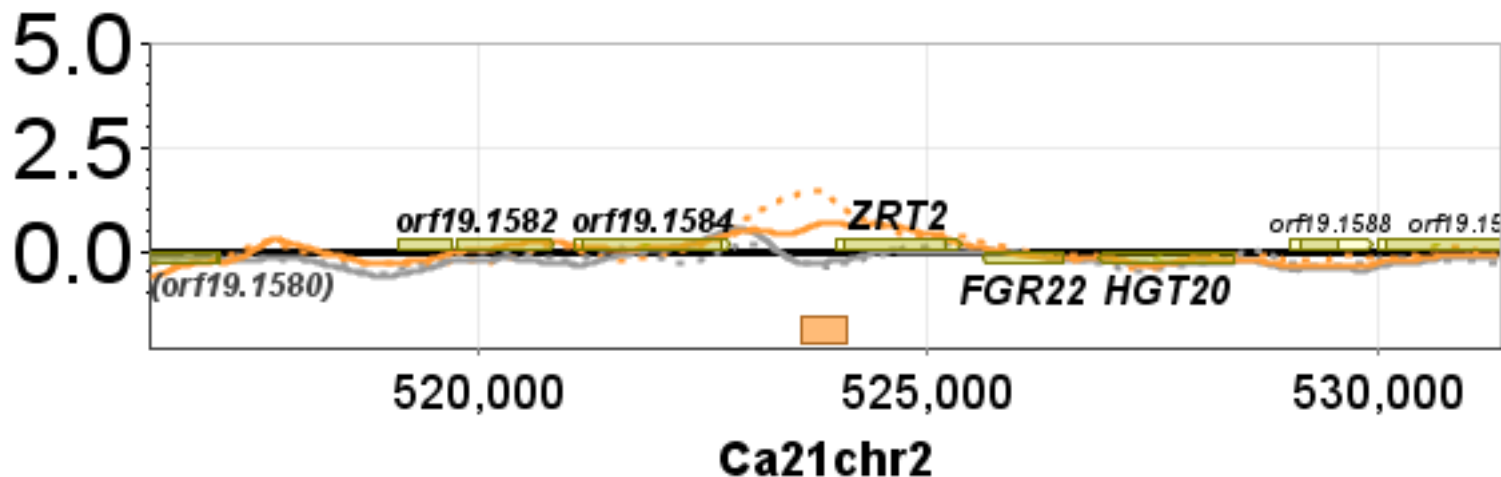

[1.478] Ca21chr7:471033-486032 [+] [ntar\_1106, TRS33, WHI3, ntar\_1105, orf19.6498]

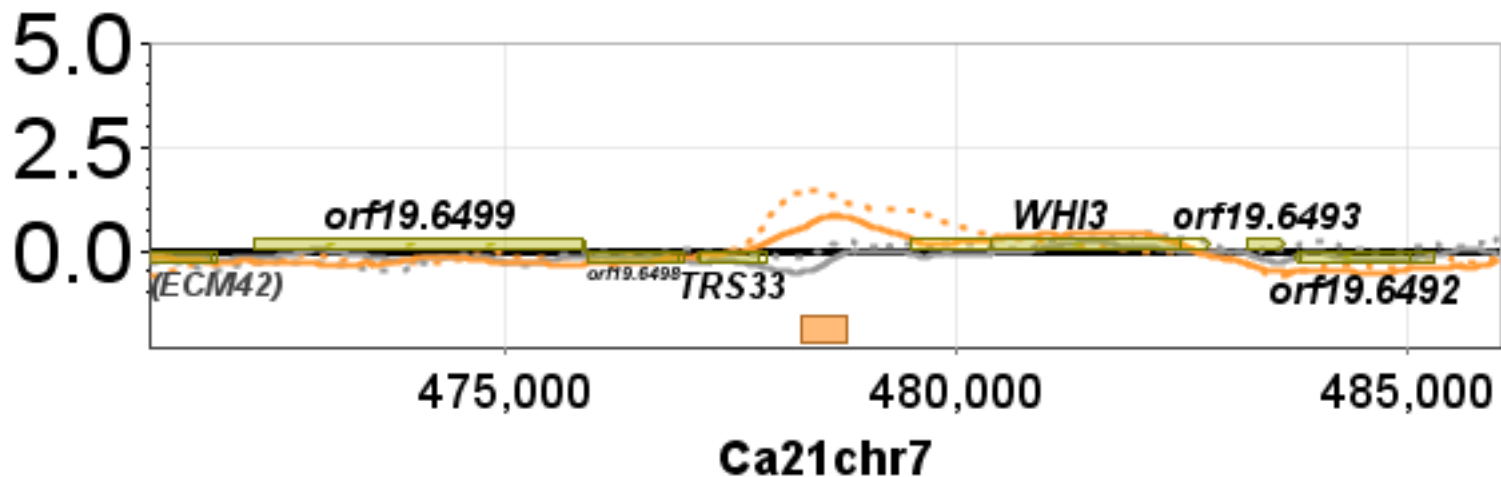

[1.473] Ca21chr3:1753564-1768563 [+] [orf19.6713, orf19.6712, orf19.6715, ntar\_688, UTP9]

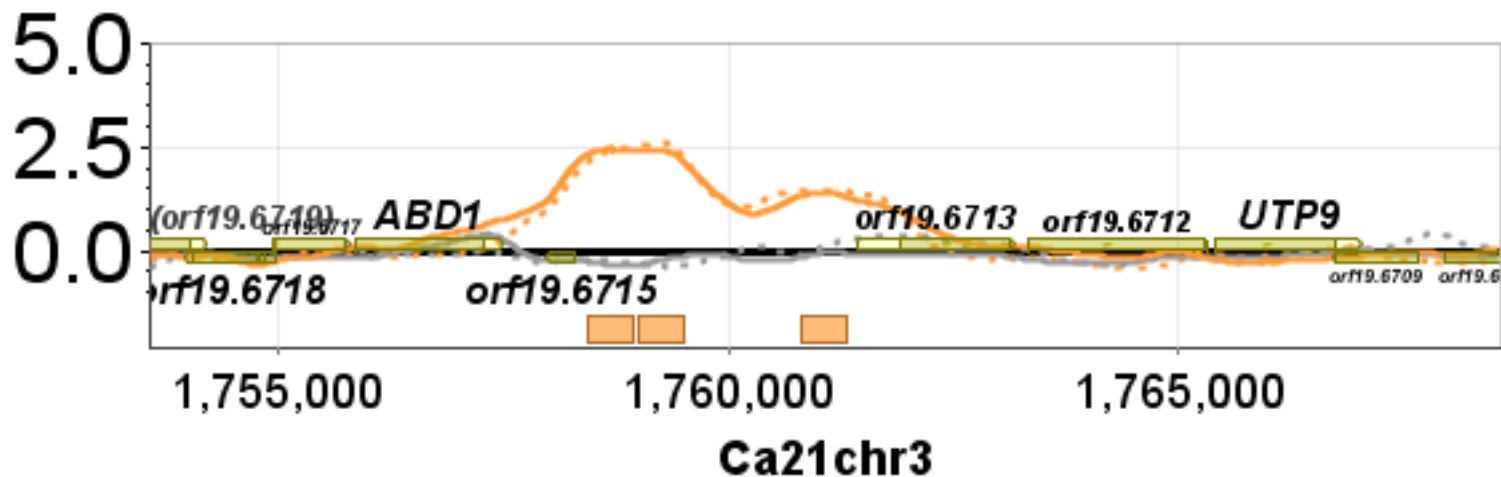

[1.47] Ca21chr1:2991729-3006728 [+] [ntar\_268, CUP2, CYB2, orf19.5003, RAD54]

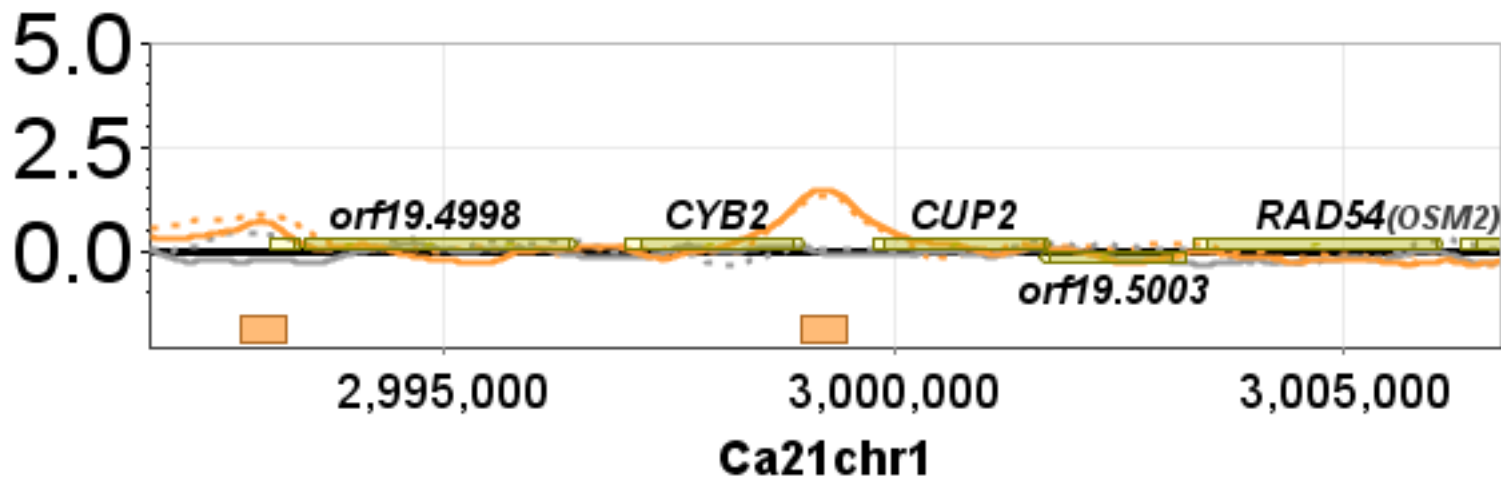

[1.466] Ca21chr7:139801-154800 [+] [ntar\_1062, orf19.7041, orf19.7042, orf19.7043, orf19.7038]

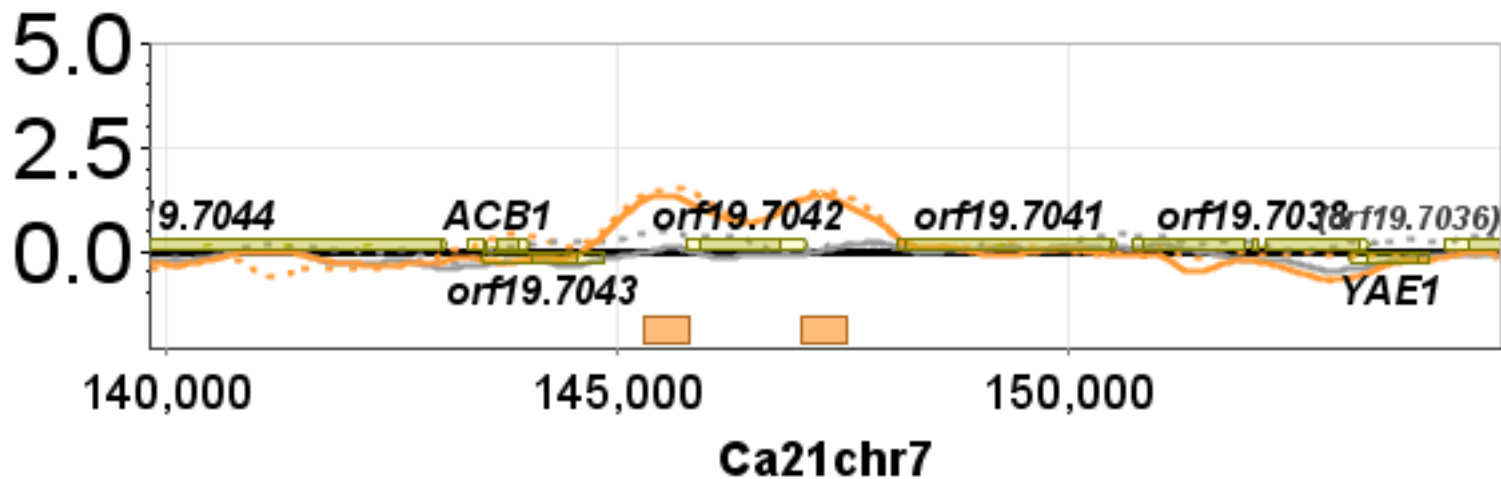

[1.461] Ca21chrR:2051240-2066239 [+] [RTA4, ntar\_1390, PLB3, ntar\_1389, orf19.6596]

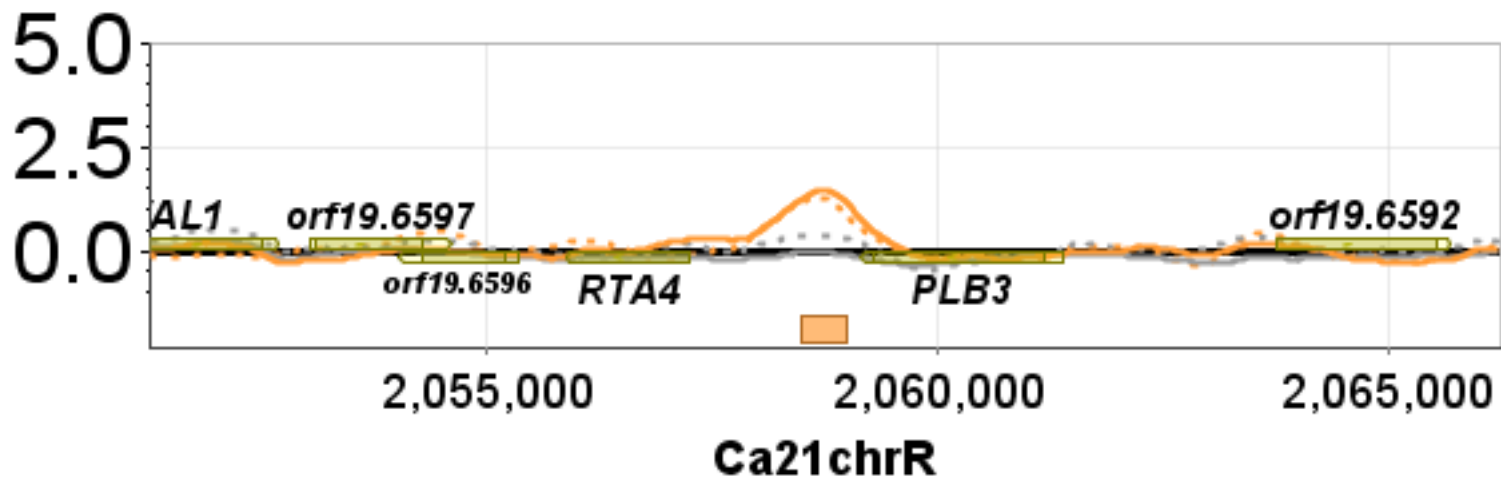

[1.459] Ca21chr3:601921-616920 [+] [FAA21, orf19.273, TFC4, ADH4, orf19.275]

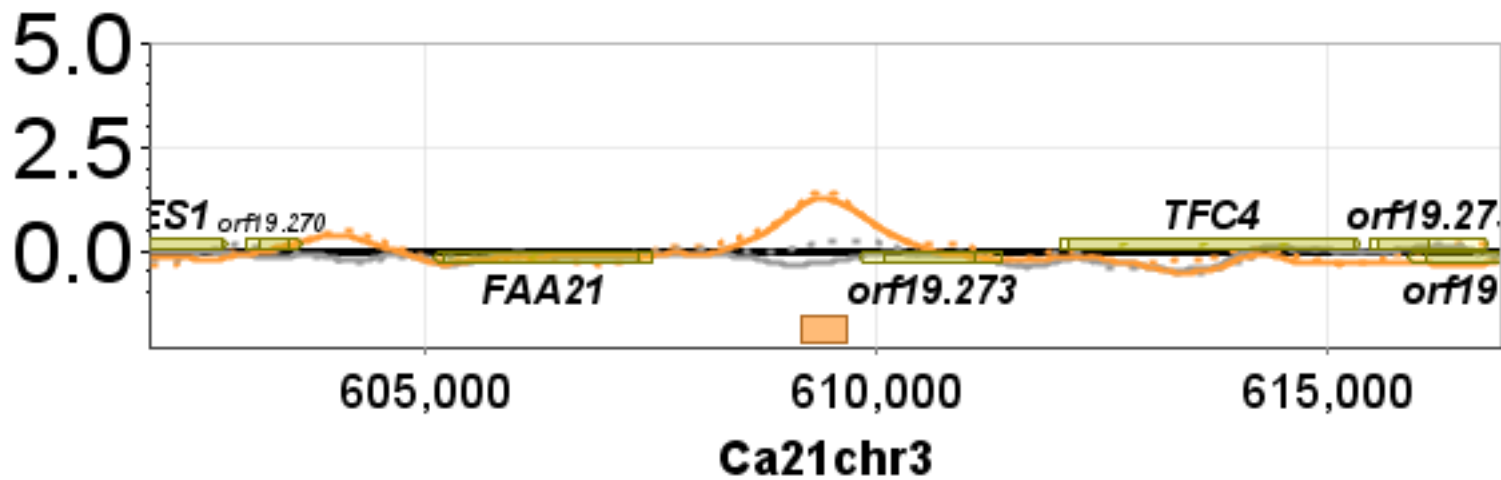

[1.455] Ca21chr7:666369-681368 [+] [SSP96, PGA28, orf19.5143, orf19.5147, DFR1]

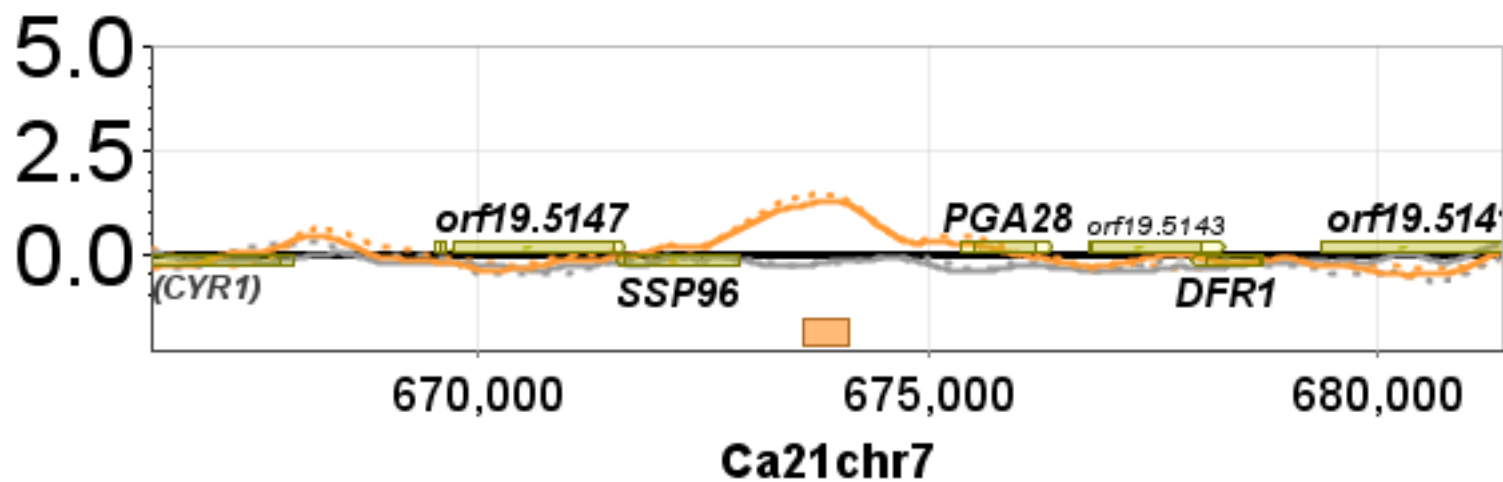

[1.451] Ca21chr3:1246821-1261820 [+] [orf19.6996, orf19.6995, BAT22, orf19.6997, GTT1]

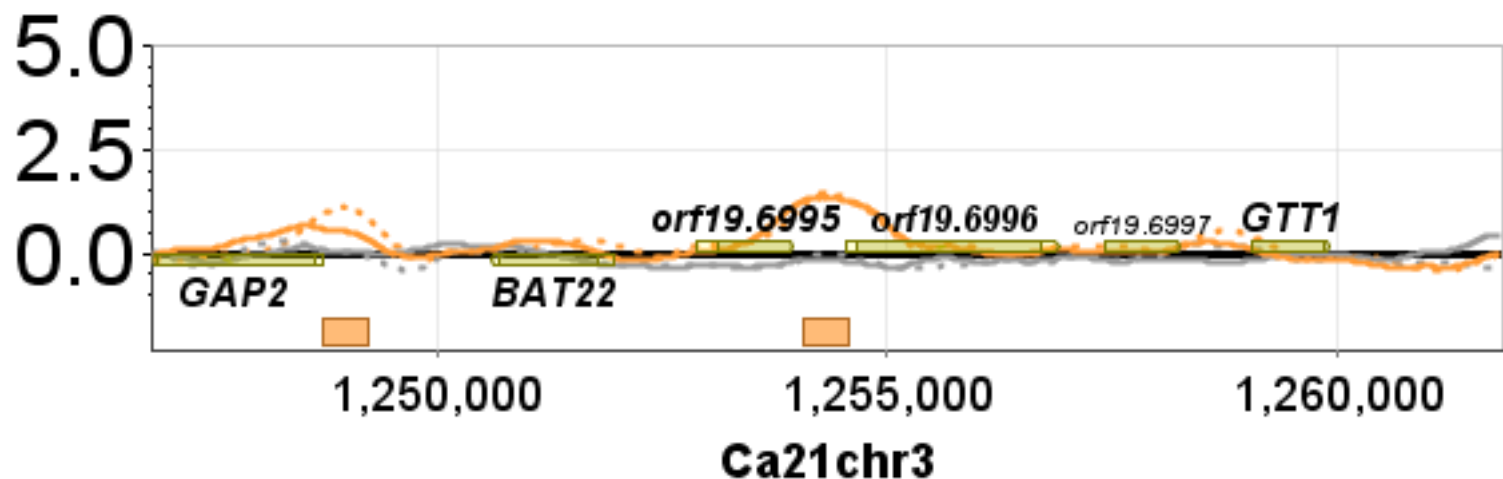

[1.446] Ca21chr2:1195663-1210662 [+] [orf19.5210.1, ntar\_397, orf19.5210, IDP1, orf19.5212]

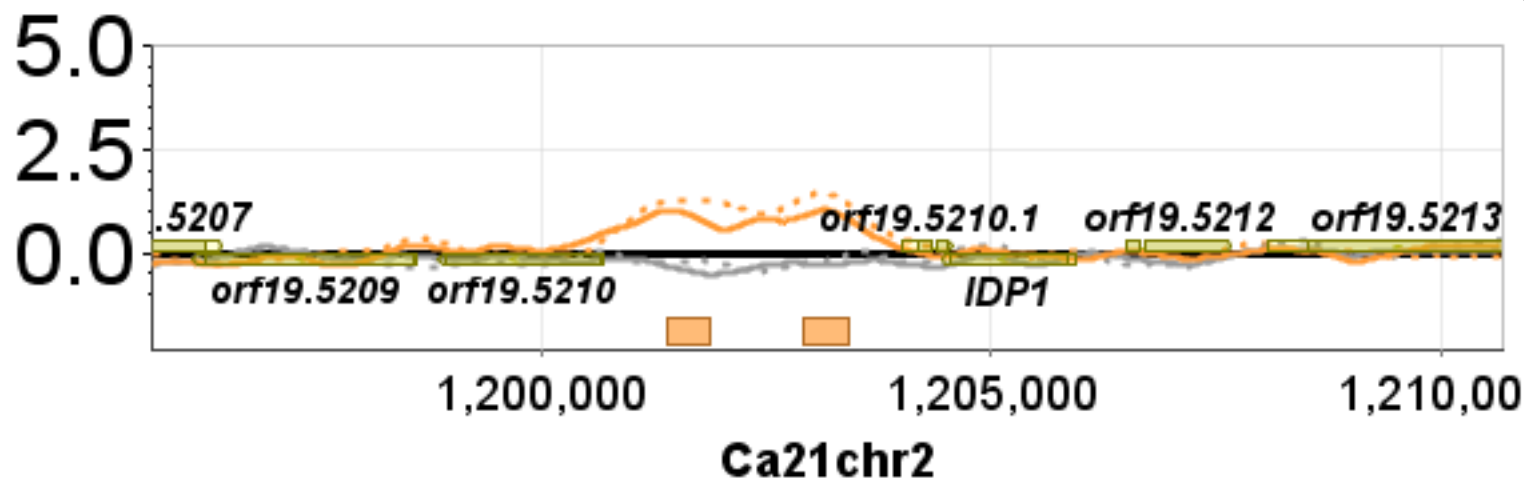

[1.441] Ca21chr4:281695-296694 [+] [ntar\_739, HAP3, UEC1, ntar\_740, BEM1]

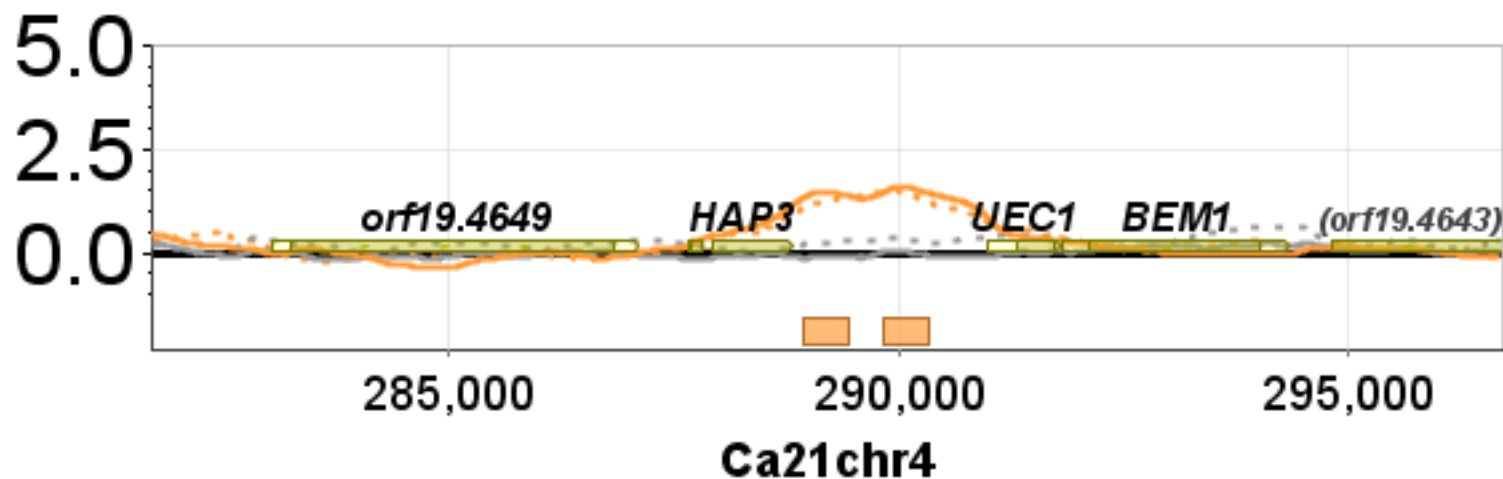

[1.439] Ca21chr1:1278516-1293515 [+] [HAC1, orf19.2431, ntar\_123, orf19.2433, orf19.2430]

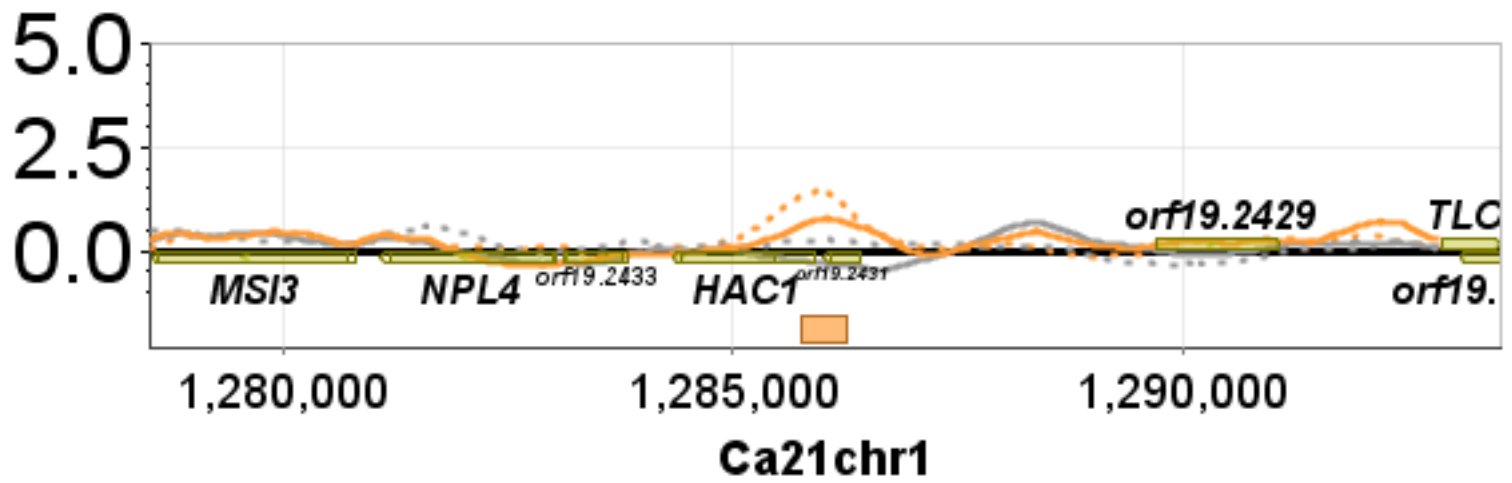

[1.433] Ca21chr5:701013-716012 [+] [ntar\_915, ntar\_914, orf19.4347, orf19.4346, ntar\_916]

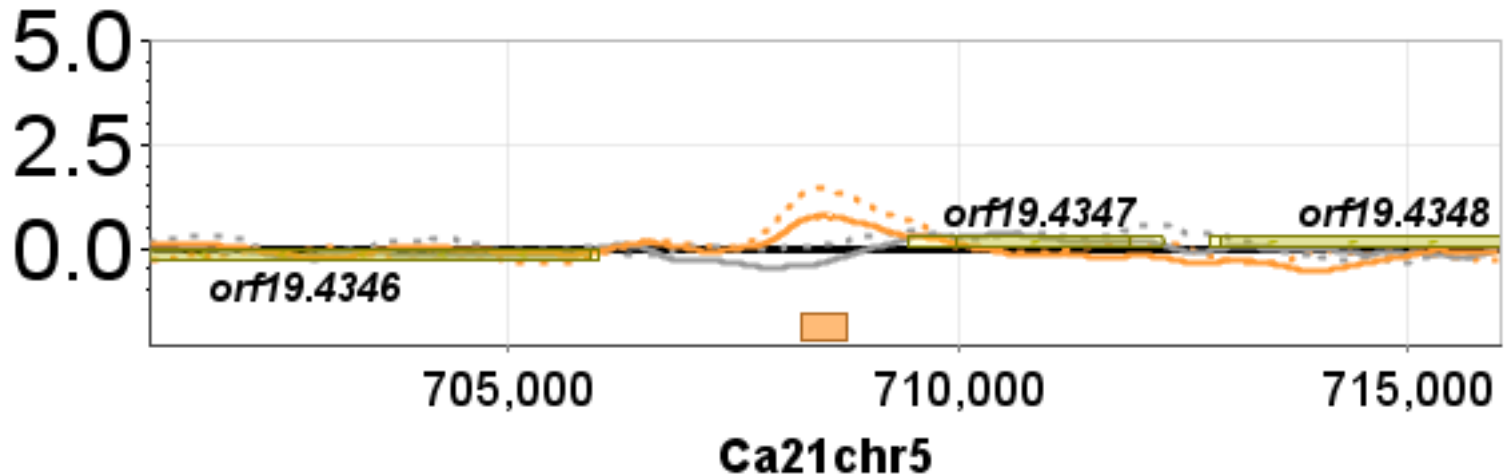

[1.428] Ca21chr7:621580-636579 [+] [ENA21, PMT1, orf19.5169, LIP9, TAF19]

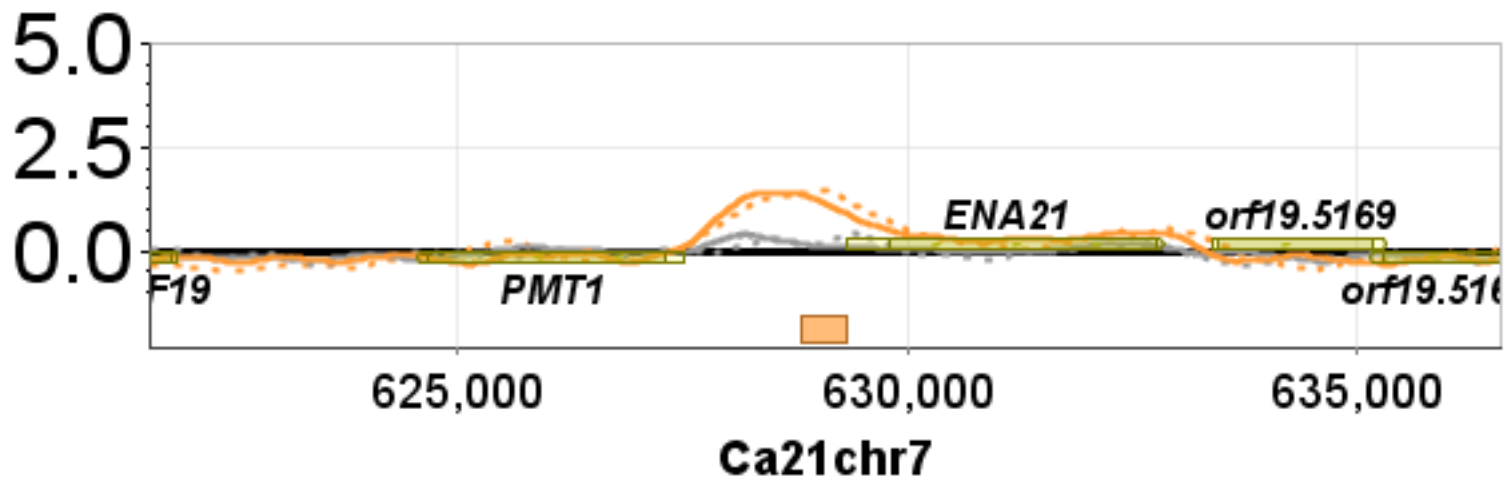

[1.424] Ca21chr3:977056-992055 [+] [orf19.5924, orf19.5921, orf19.5925, orf19.5920, ARG11]

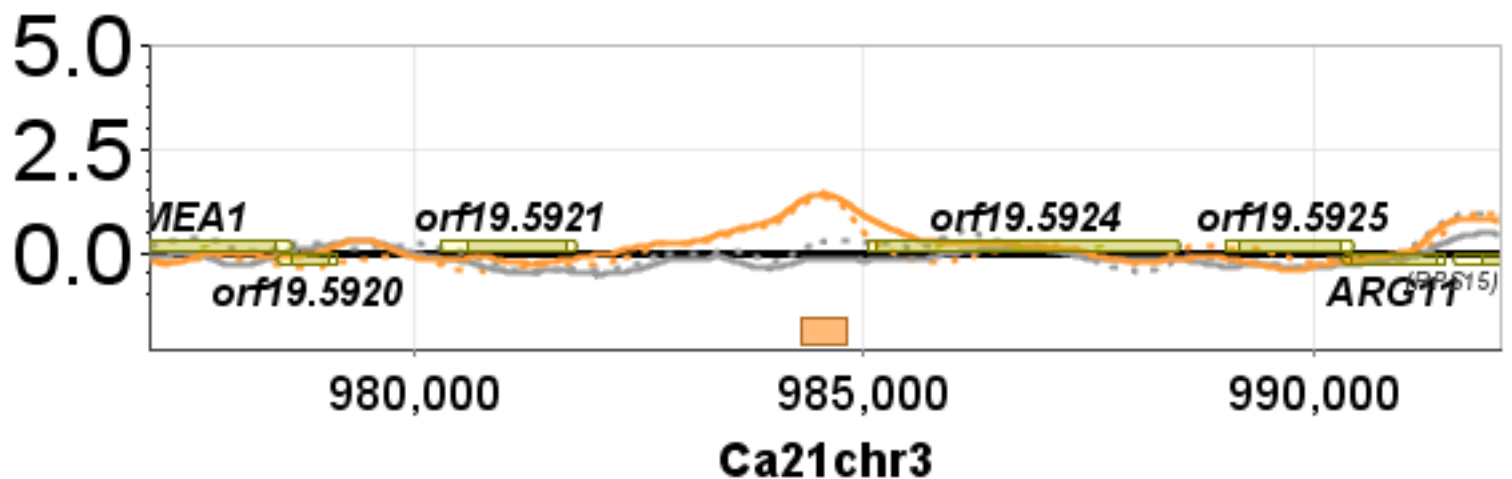

[1.421] Ca21chr1:1731334-1746333 [+] [ntar\_163, orf19.5069, ntar\_164, ntar\_165, ntar\_166]

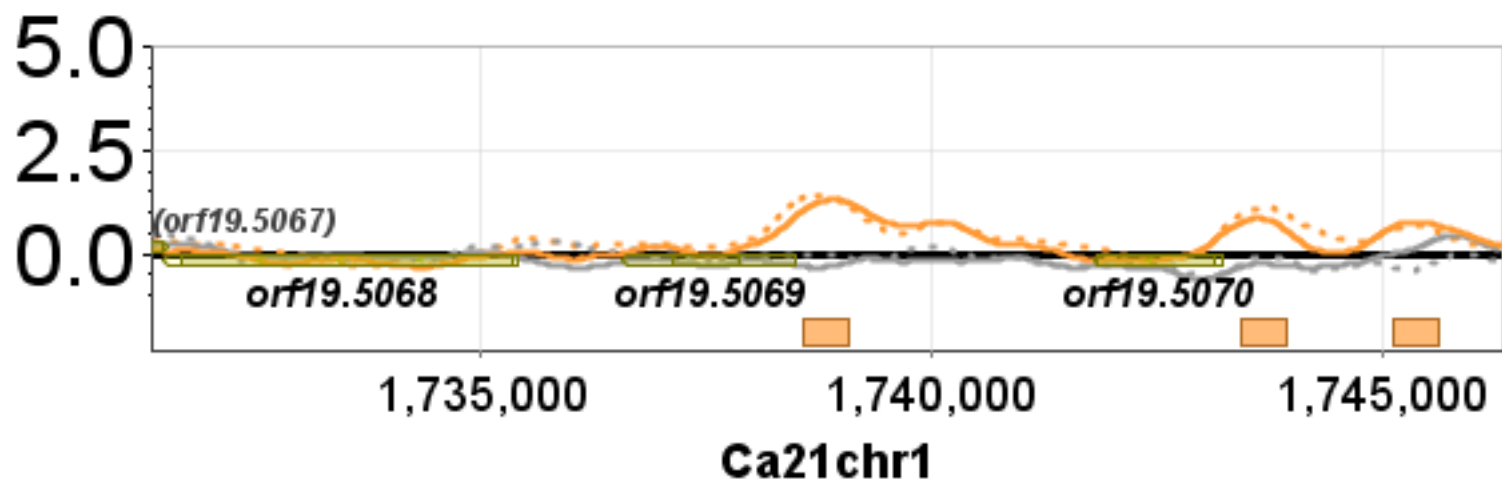

[1.419] Ca21chr4:928407-943406 [+] [orf19.1409.2, orf19.1409.1, VAC7, orf19.1409.3, ntar\_798]

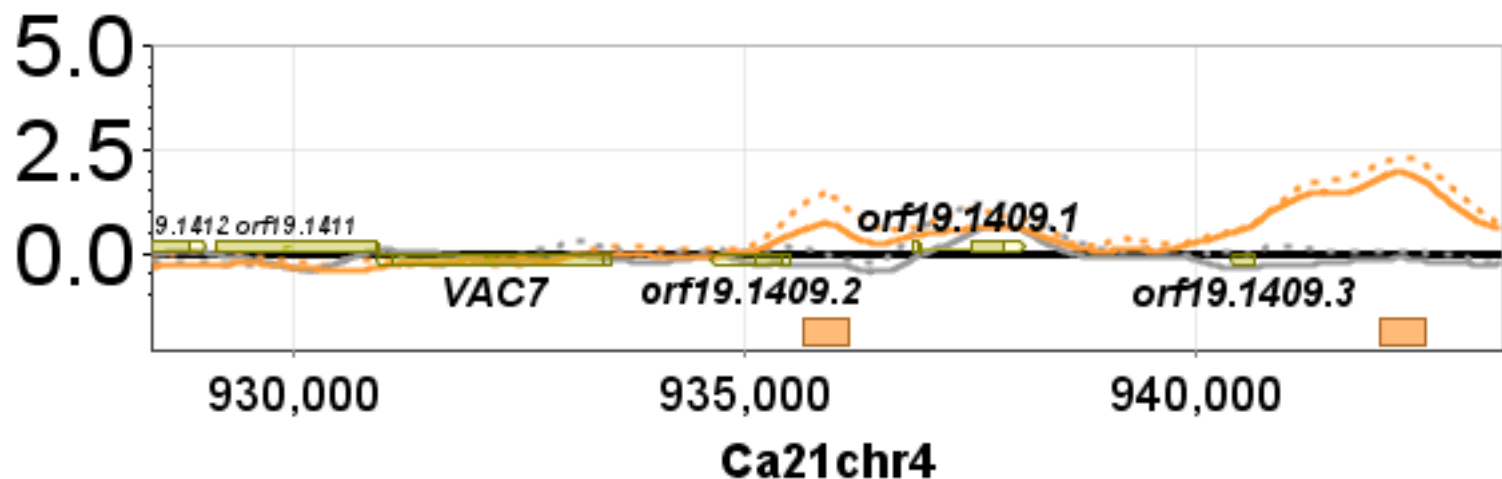

[1.418] Ca21chr6:355243-370242 [+] [ntar\_996, PTK2, SUR7, FGR37, ATG15]

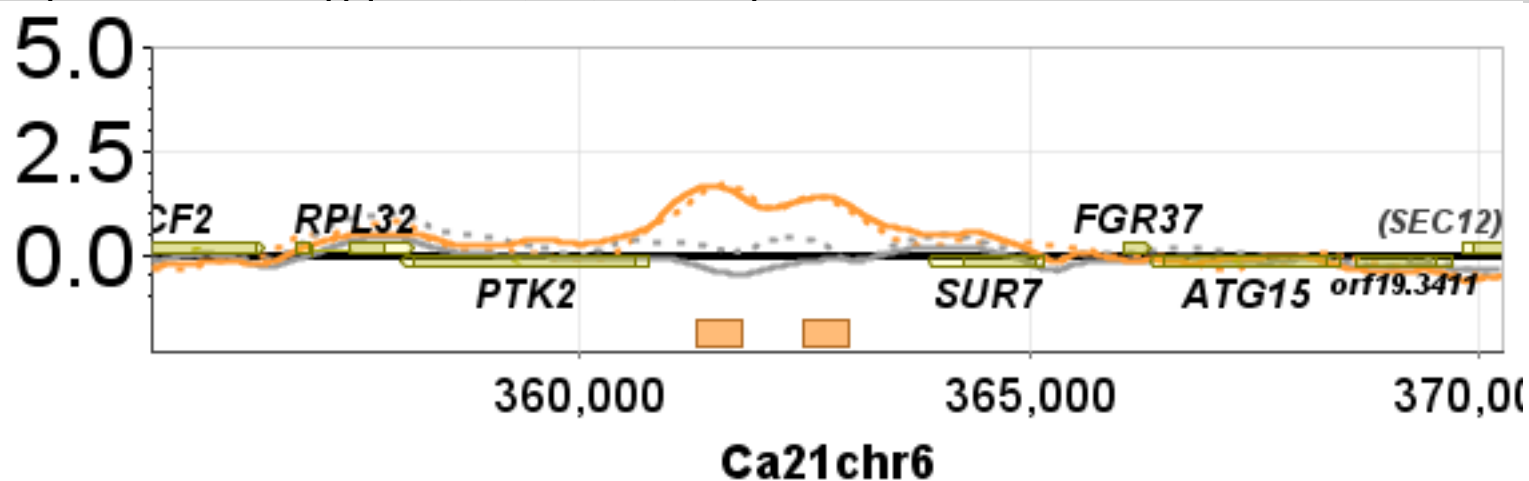

[1.411] Ca21chr4:559793-574792 [+] [orf19.2725, orf19.2724, orf19.2726, ntar\_770, ntar\_769]

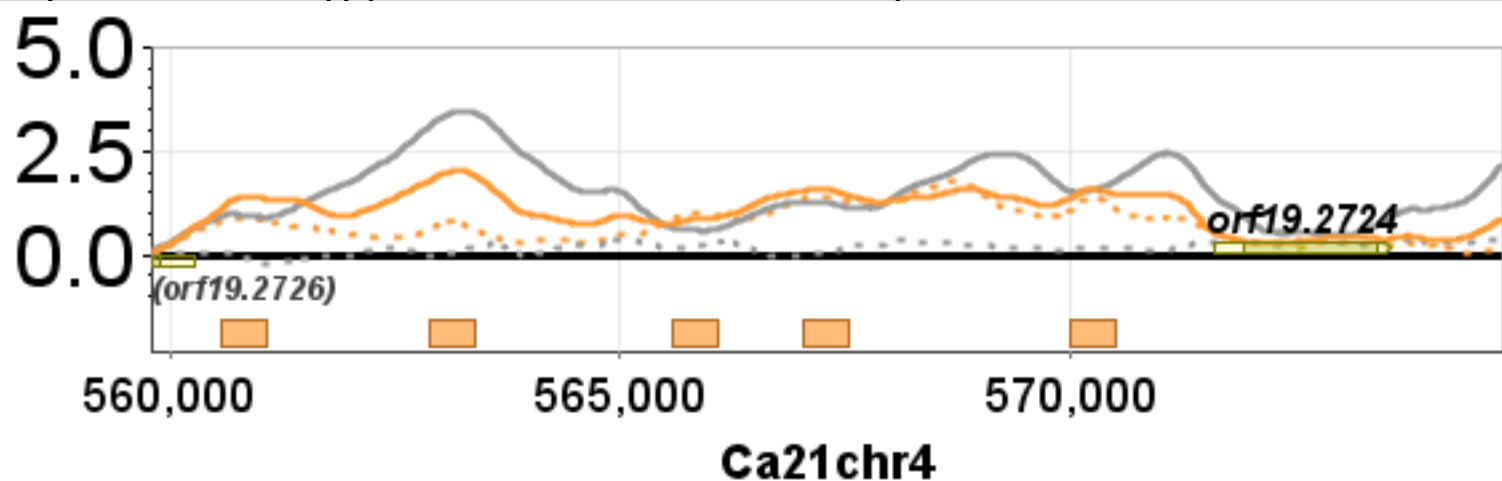

[1.396] Ca21chr4:562764-577763 [+] [orf19.2724, orf19.2725, ntar\_770, HIT1]

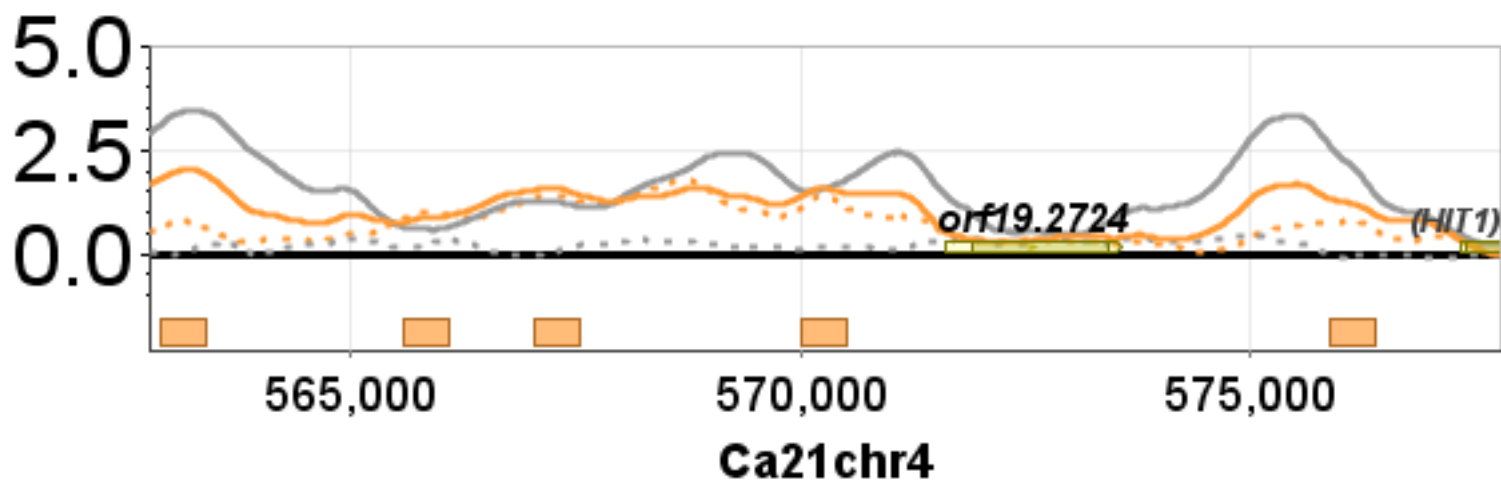

[1.394] Ca21chr4:862678-877677 [+] [orf19.5304, RHD3, PGA30, orf19.5306, PGA31]

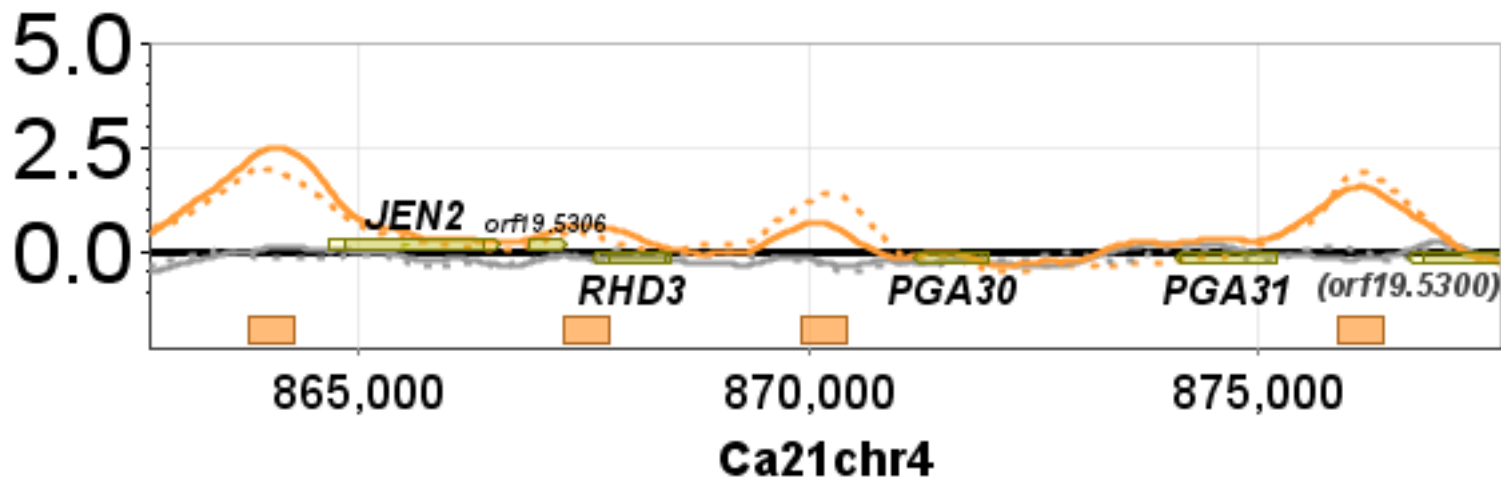

[1.389] Ca21chr2:446003-461002 [+] [OPI1, orf19.1544, ntar\_329, HEX3, orf19.1545]

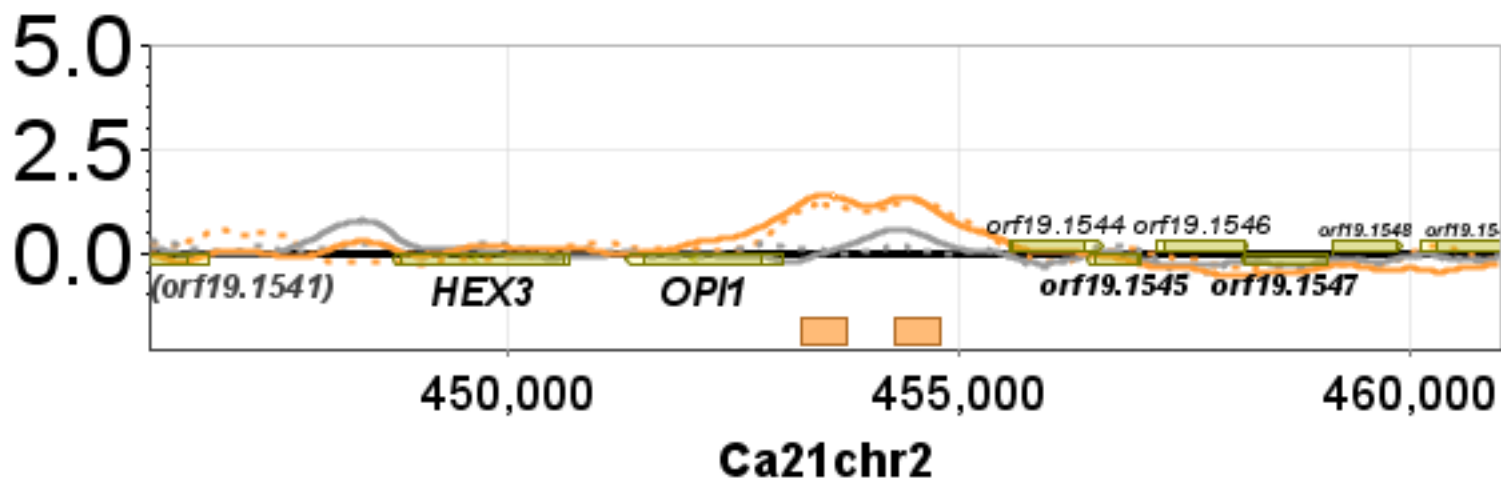

[1.38] Ca21chr5:253520-268519 [+] [CYC3, ntar\_867, orf19.1956, ntar\_866, ntar\_1424]

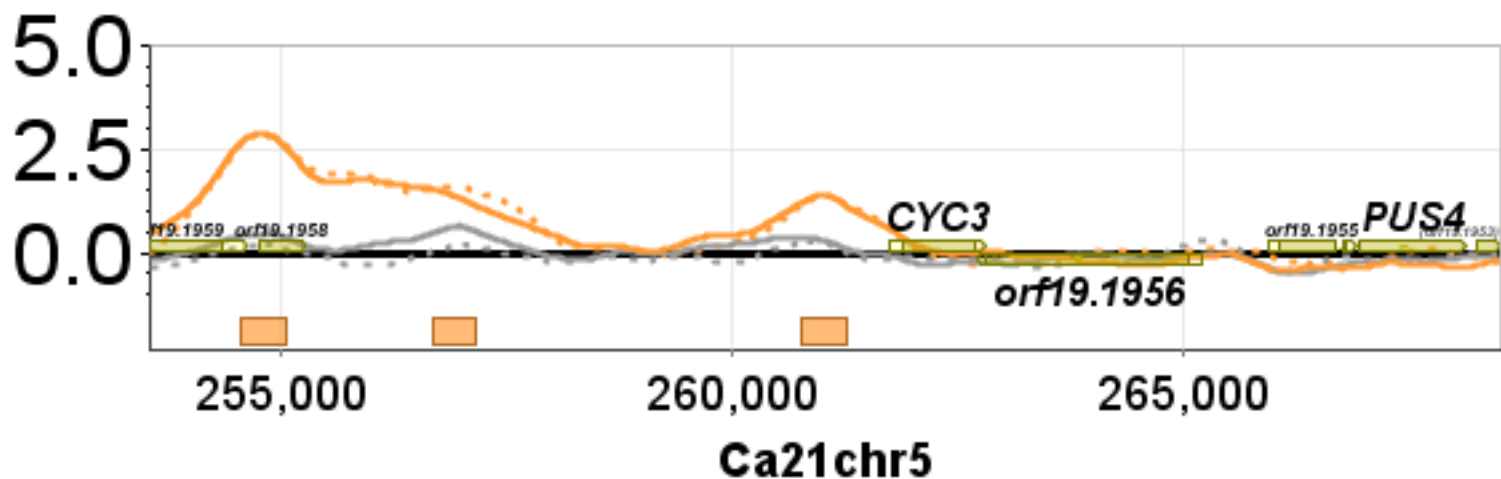

[1.375] Ca21chr2:1736143-1751142 [+] [ntar\_448, ntar\_450, ntar\_449, ntar\_446, ntar\_451]

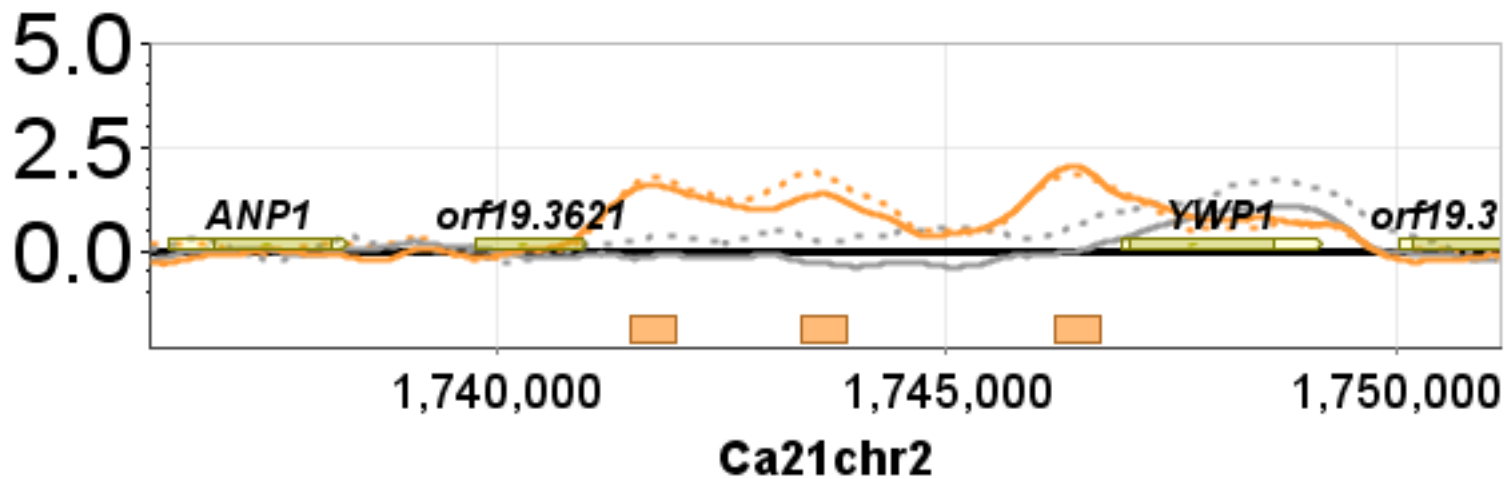

[1.374] Ca21chr3:995452-1010451 [+] [orf19.5933, orf19.5932, orf19.5934, orf19.5935, orf19.5931]

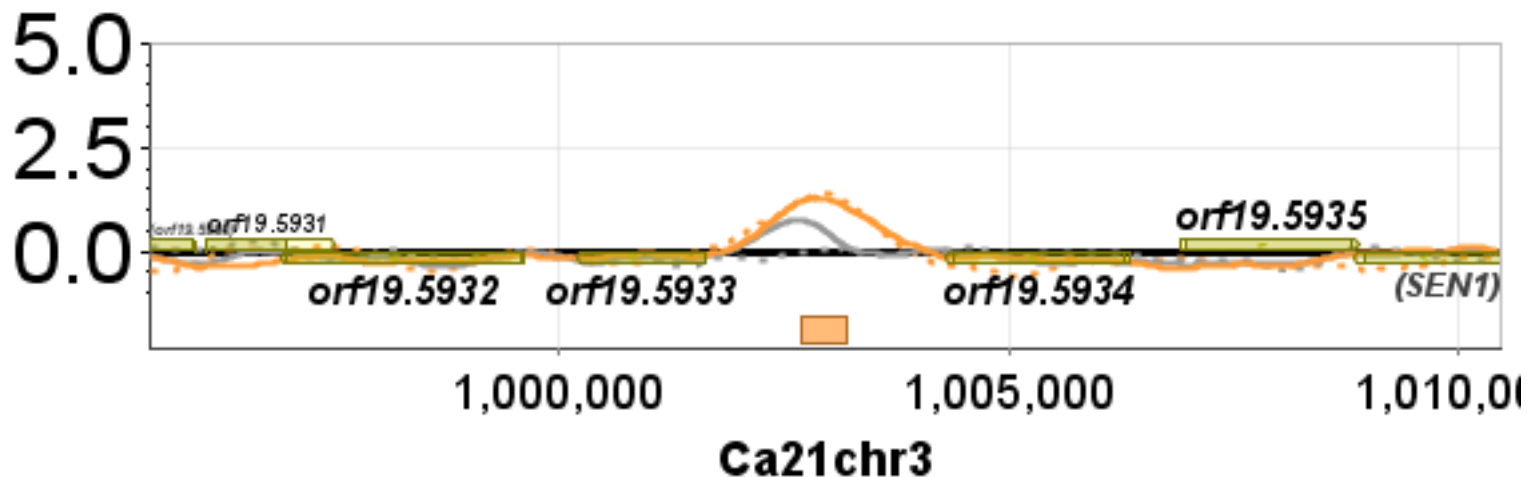

[1.37] Ca21chr5:648217-663216 [+] [orf19.4321, ntar\_909, orf19.4320, ntar\_908, DAP2]

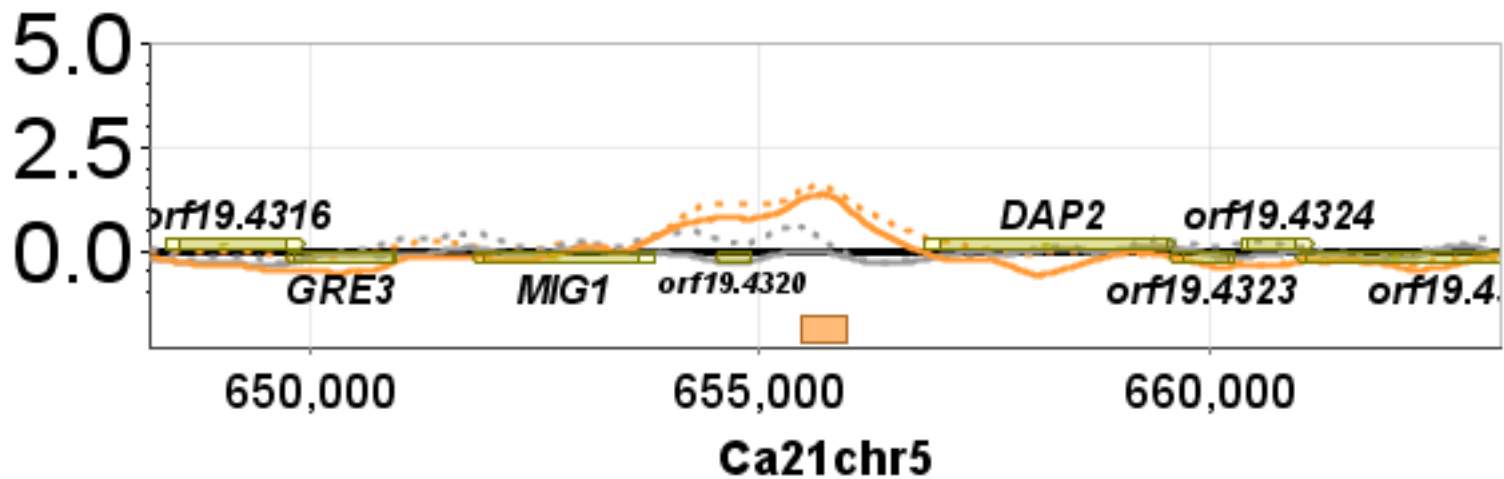

[1.369] Ca21chr1:2615731-2630730 [+] [orf19.5267, ntar\_246, orf19.5268, orf19.5269, orf19.5266]

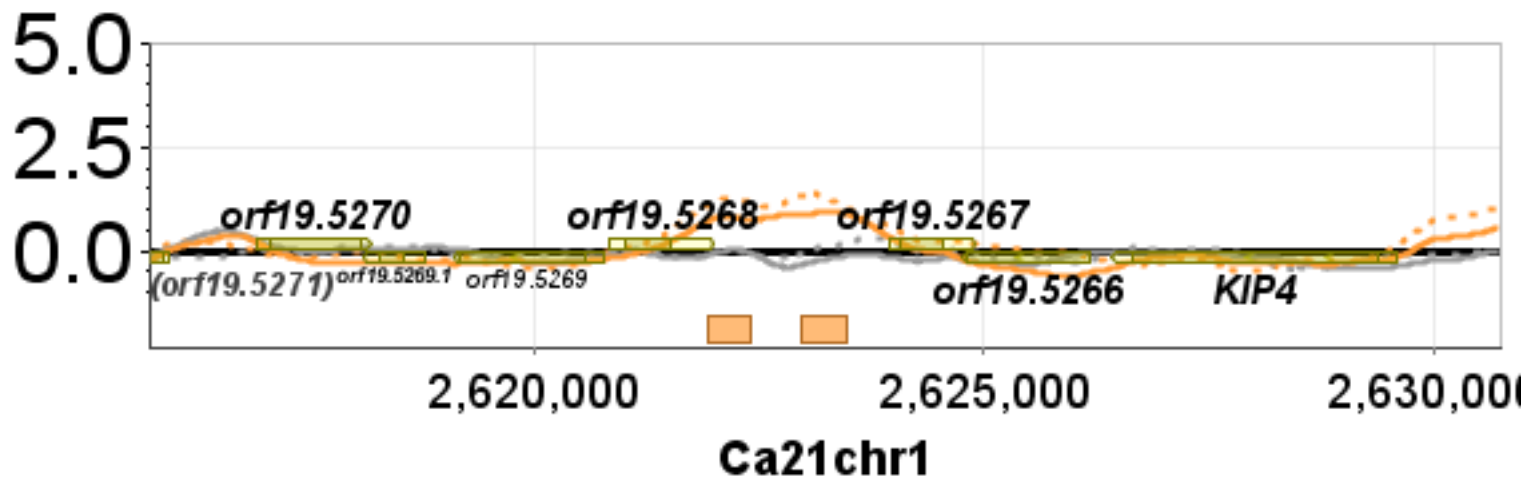



[1.364] Ca21chr6:575019-590018 [+] [orf19.5556, MNN4-4, orf19.5555, ntar\_1010, ntar\_1011]

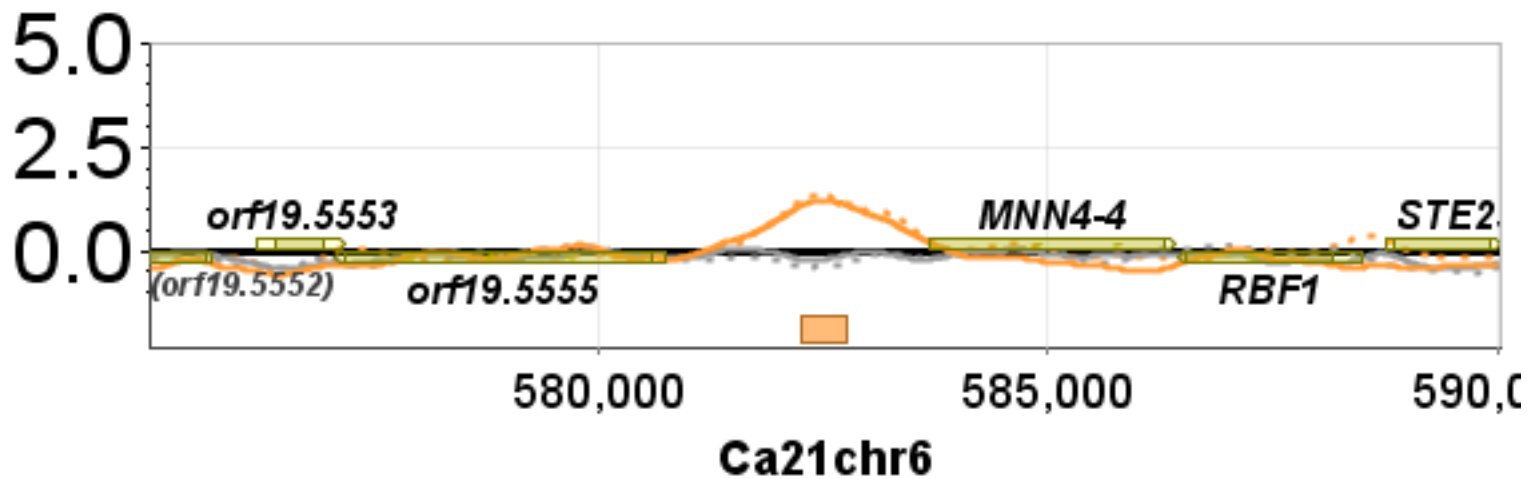

[1.353] Ca21chrR:71781-86780 [+] [orf19.7502, orf19.7501, CDA2, PXA1, orf19.7504]

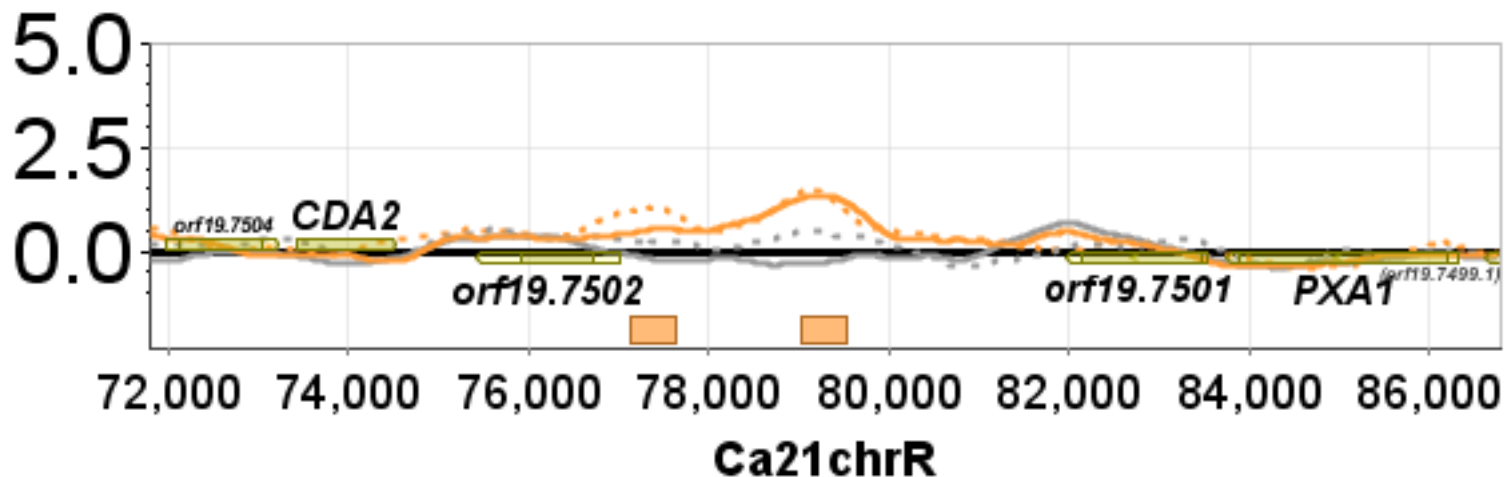

[1.349] Ca21chr3:965542-980541 [+] [orf19.5917.3, STP3, orf19.5918, MEA1, orf19.5915]

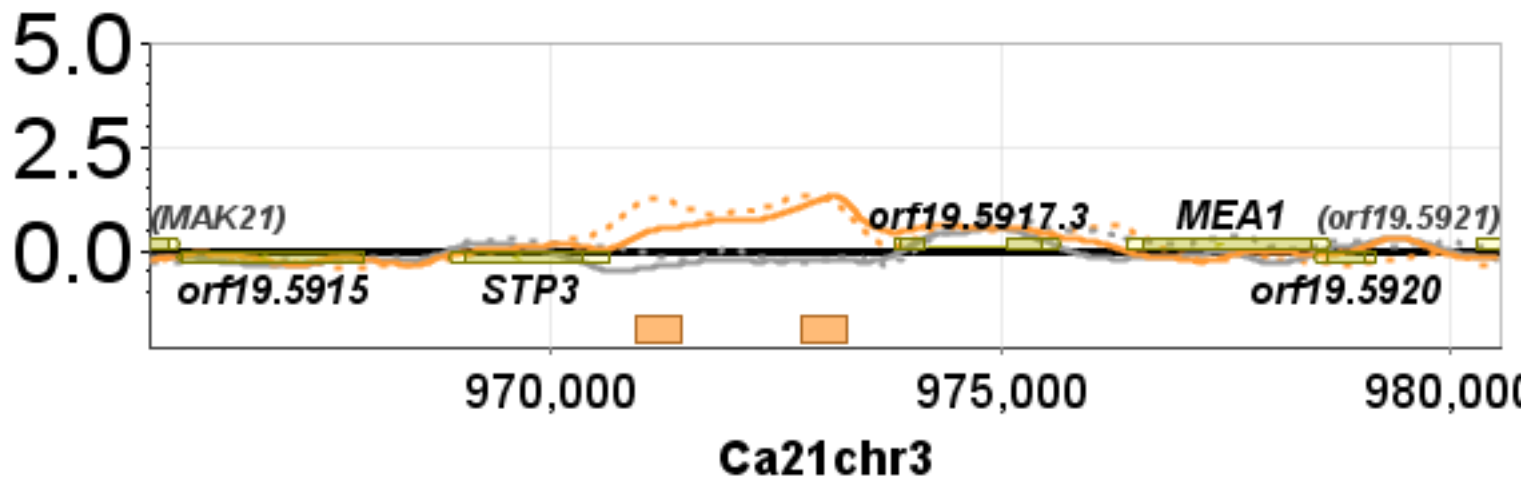

[1.346] Ca21chr2:424272-439271 [+] [orf19.1536, orf19.1535, ntar\_327, TLG2, orf19.1534]

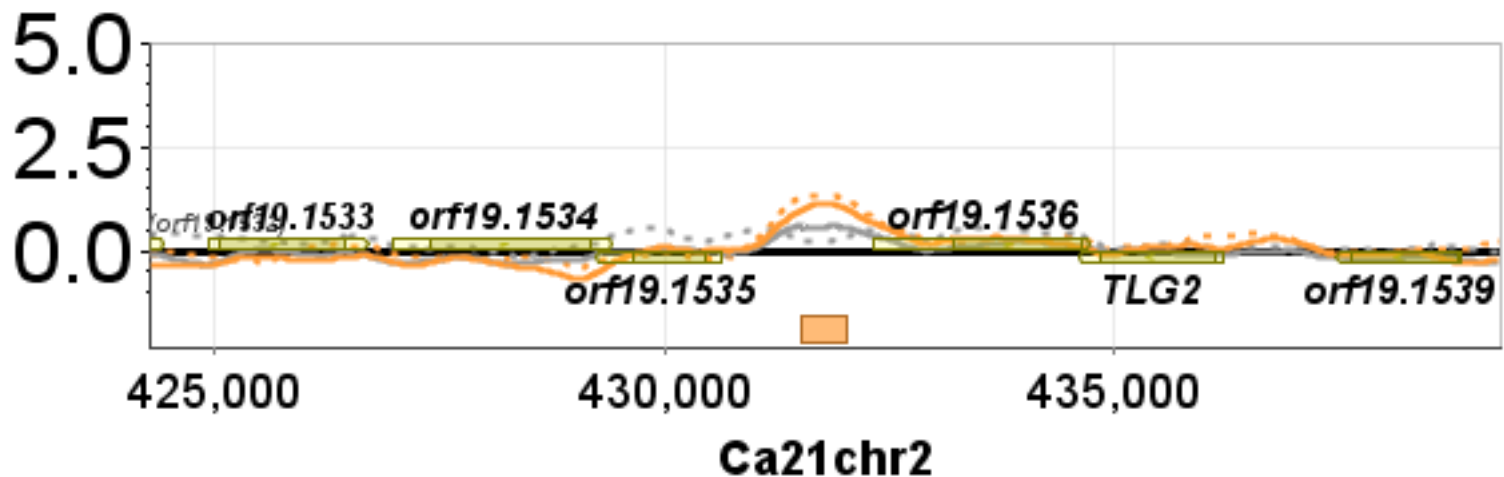

[1.345] Ca21chr1:2819118-2834117 [+] [ntar\_255, BNI1, orf19.4928, ntar\_256, orf19.4929]

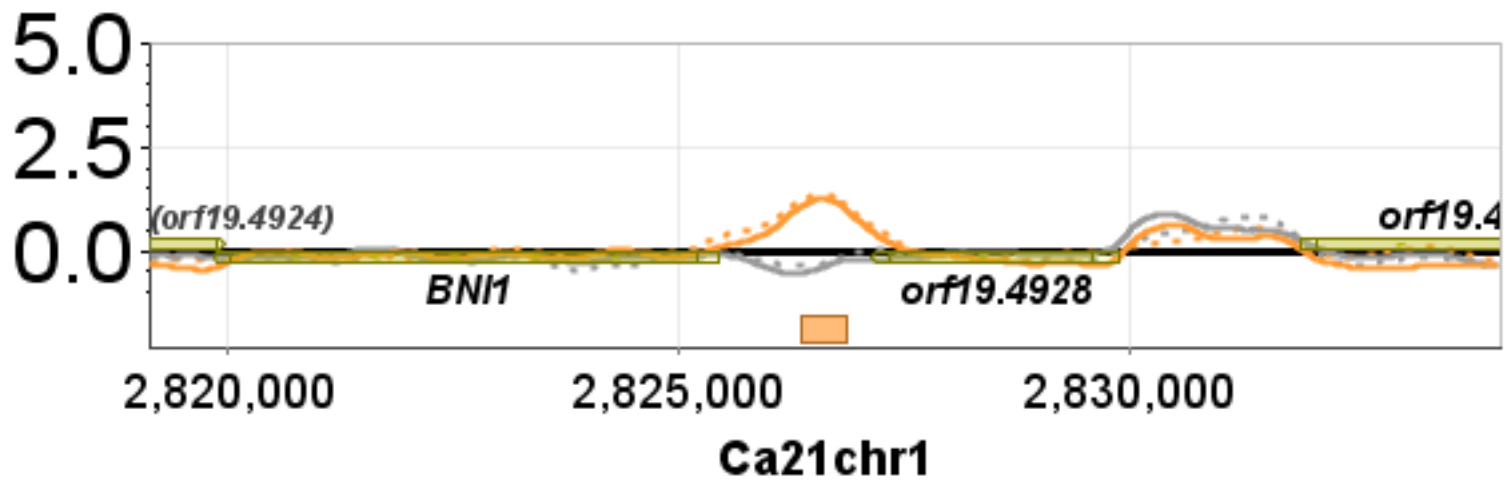

[1.339] Ca21chr1:1242663-1257662 [+] [orf19.2452, PGA45, orf19.2449, PHO87, ntar\_122]

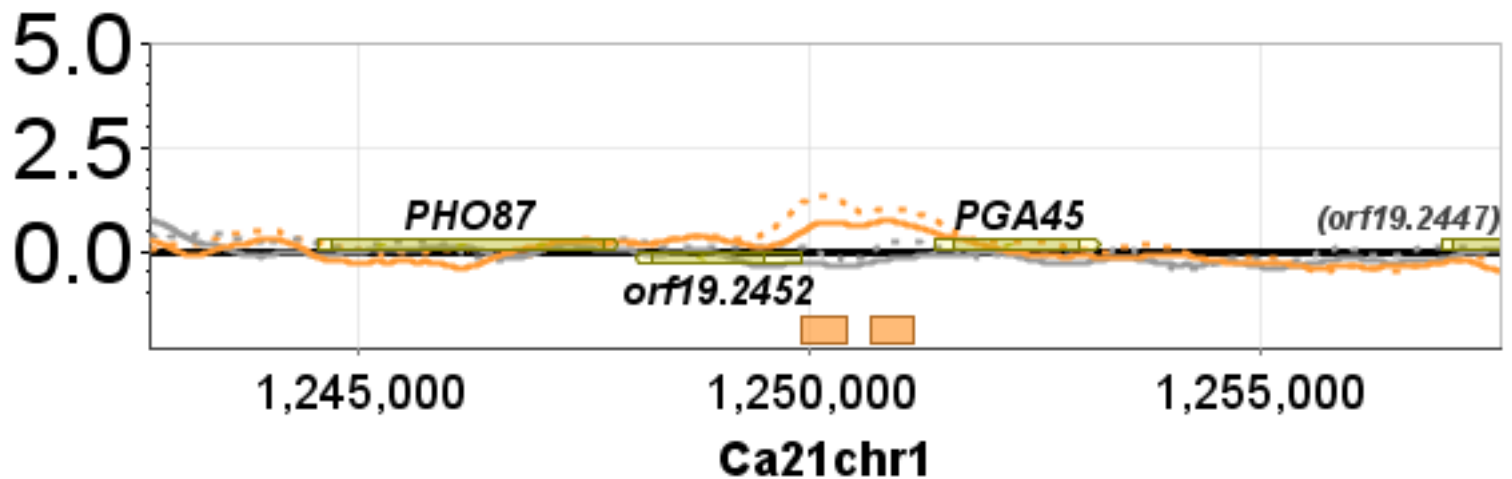

[1.338] Ca21chr3:1405885-1420884 [+] [ALS6, MMS21, ntar\_654, MUB1, TSA1]

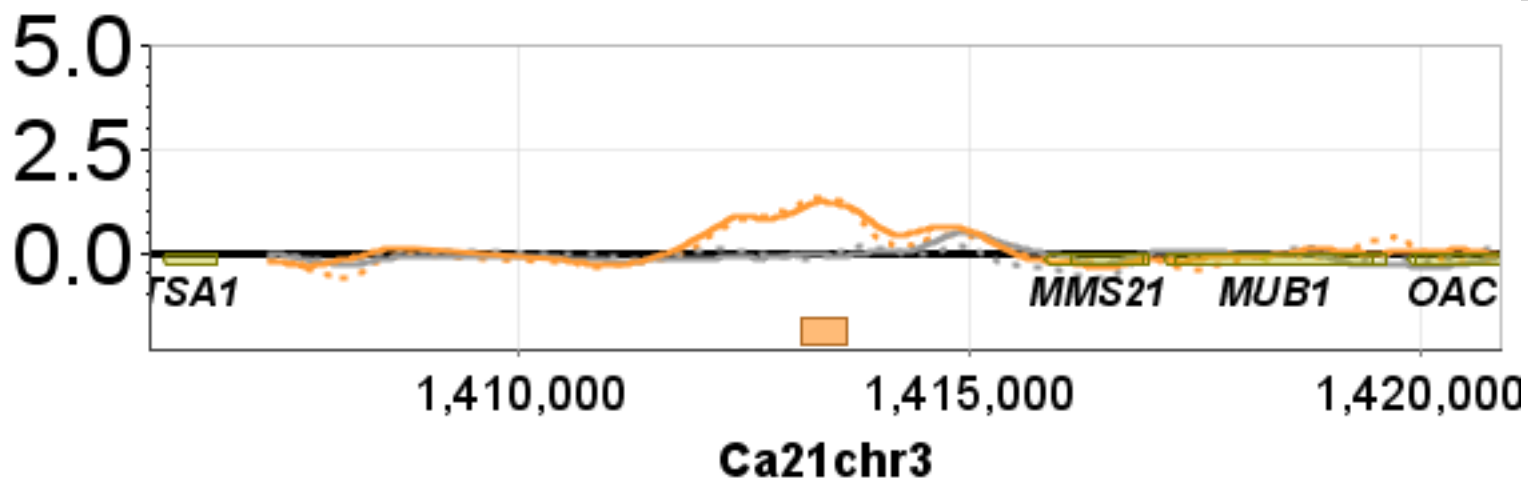

[1.336] Ca21chr5:201760-216759 [+] [GIT2, URA4, orf19.1975, TRX2, TFS1]

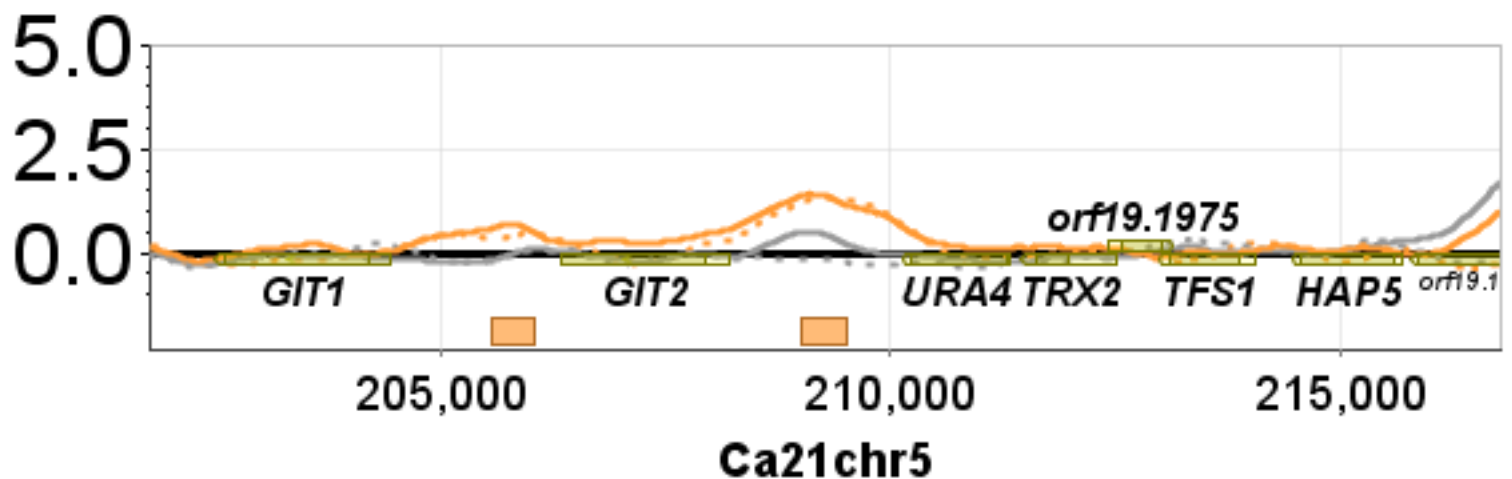

[1.33] Ca21chr1:705286-720285 [+] [EHT1, ntar\_74, orf19.3041, TPS2, ntar\_73]

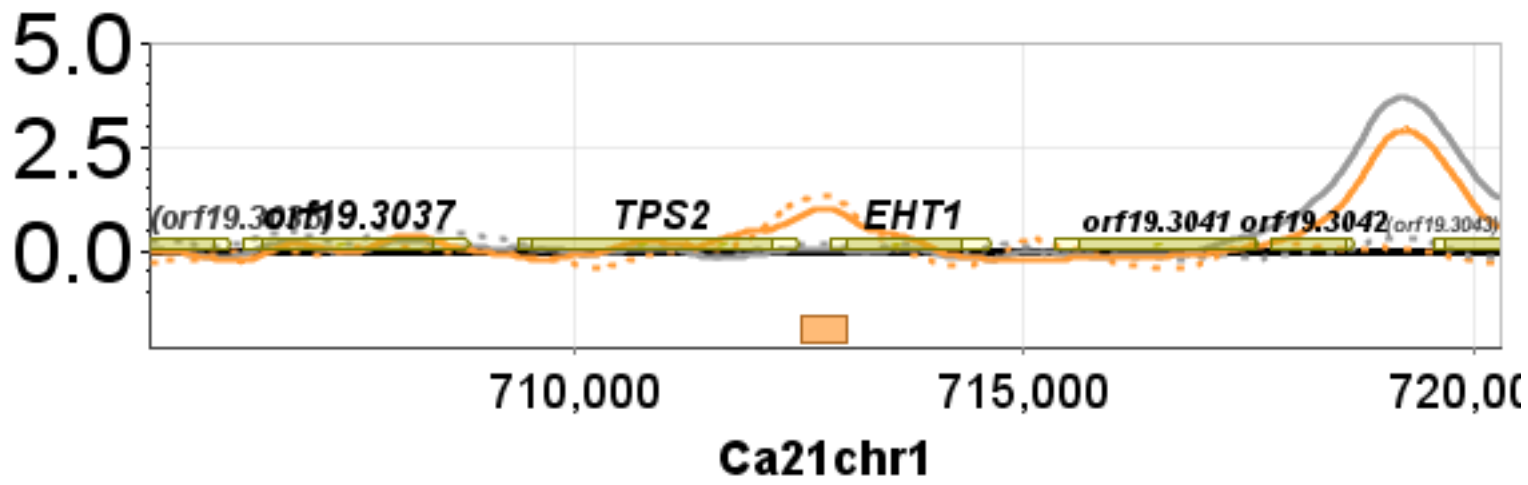

[1.328] Ca21chr5:860045-875044 [+] [orf19.3216, orf19.3218, ntar\_932, orf19.3215, ntar\_931]

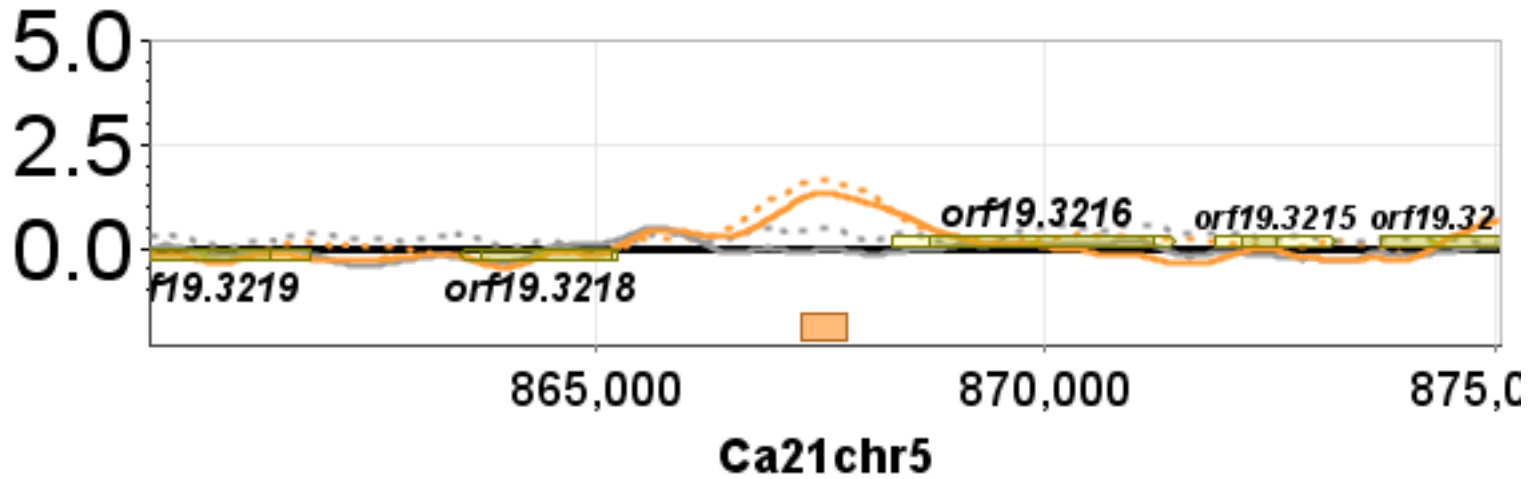

[1.326] Ca21chr5:620777-635776 [+] [GAP1, orf19.4305, orf19.4305.1, orf19.4306, orf19.4307]

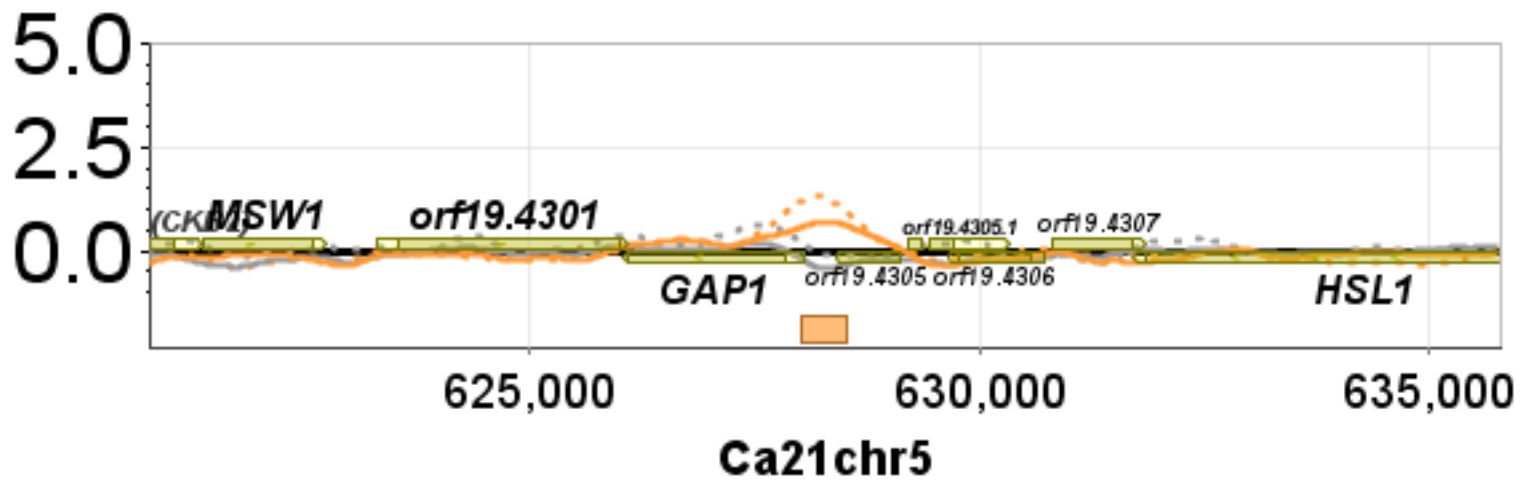

[1.326] Ca21chr7:138061-153060 [+] [orf19.7042, orf19.7043, ACB1, ntar\_1062, orf19.7041]

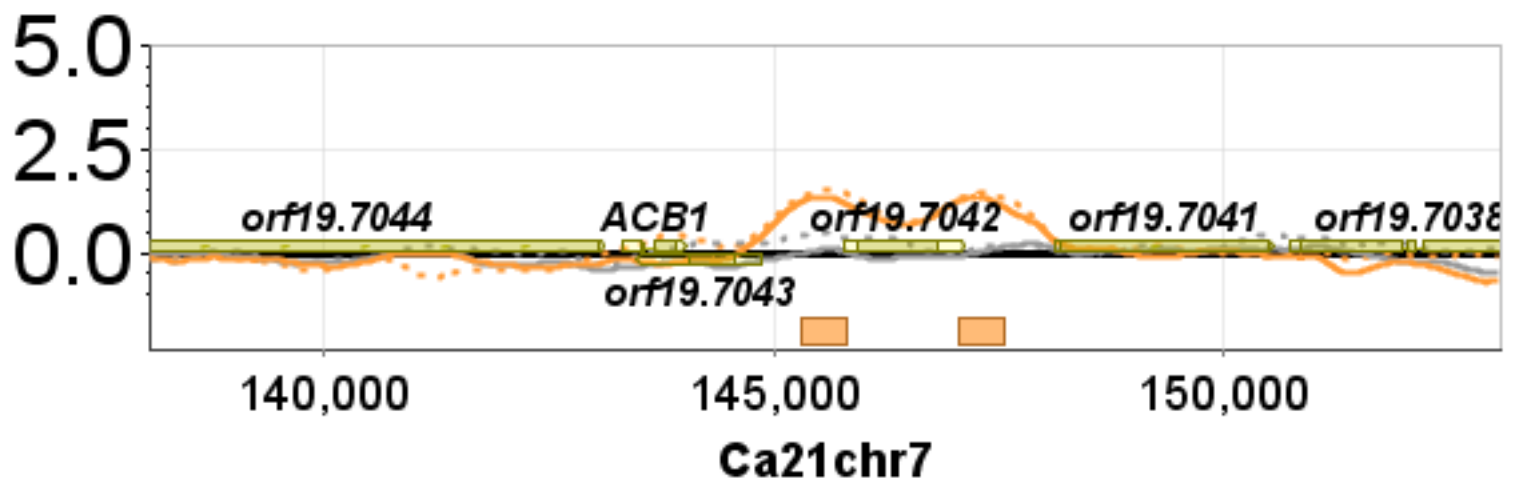

[1.322] Ca21chr4:1527752-1542751 [+] [ARR3, orf19.3122.2, GST1, RPT5, orf19.3123.2]

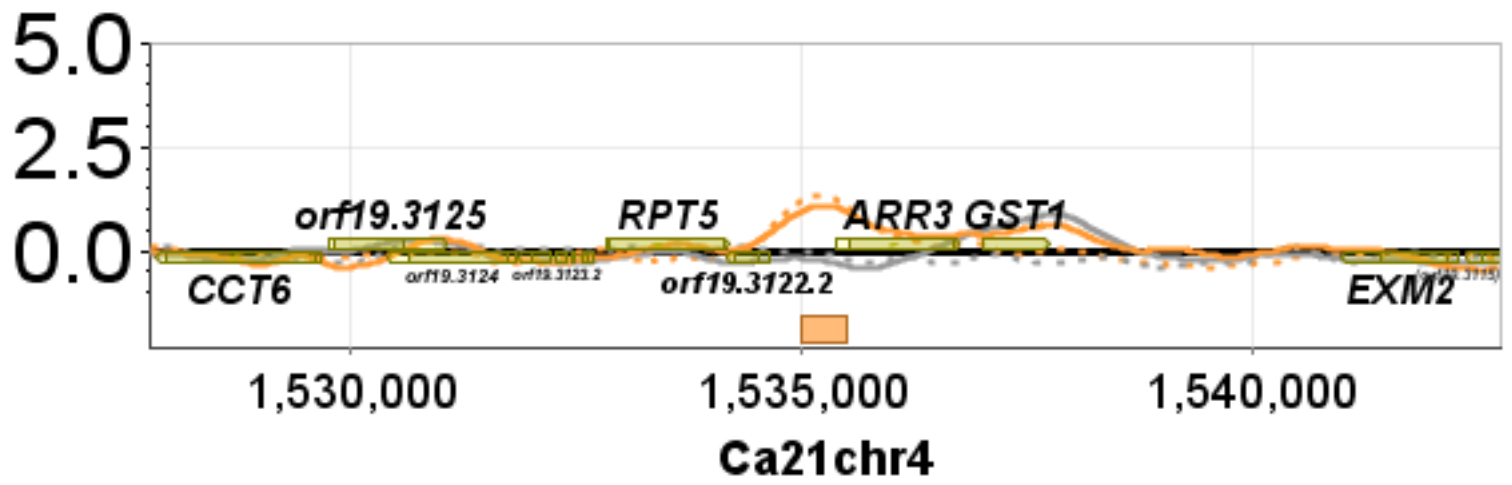

[1.319] Ca21chr5:733336-748335 [+] [orf19.2653, TEF4, CAM1-1, orf19.2650.1, RMS1]

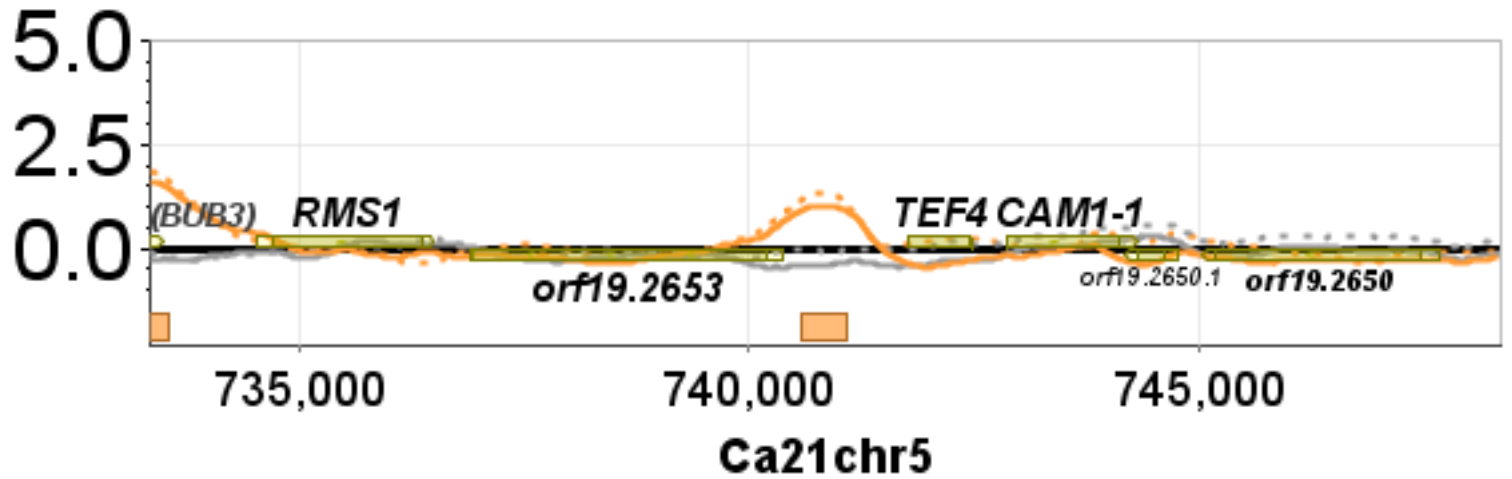

[1.318] Ca21chr1:1570343-1585342 [+] [RME1, ntar\_141, orf19.4437, ntar\_140, ntar\_139]

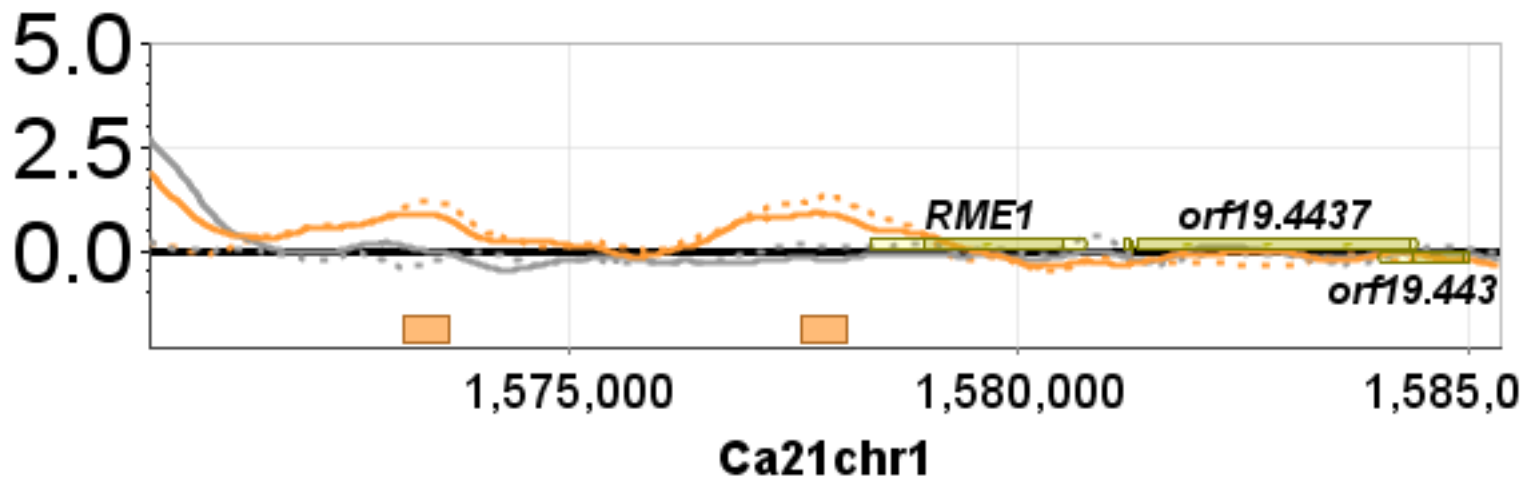

[1.315] Ca21chr6:35841-50840 [+] [orf19.1190, orf19.1191, orf19.1189, ntar\_969, DNA2]

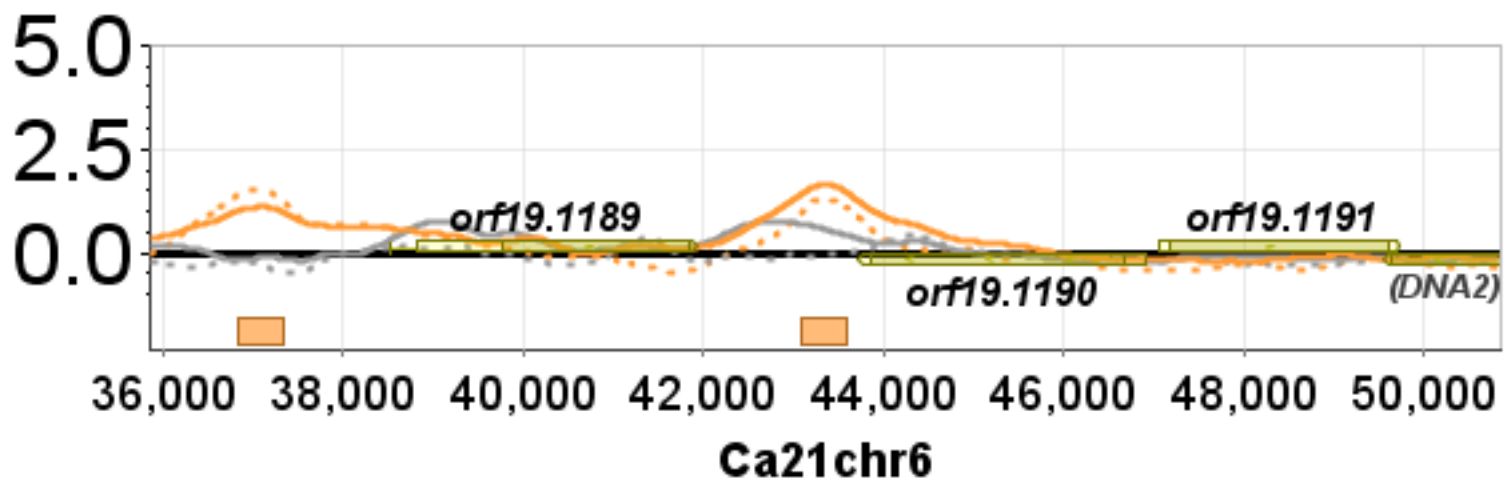

[1.312] Ca21chr7:439588-454587 [+] [ntar\_1102, ntar\_1103, ntar\_1101, CUP9, HSP90]

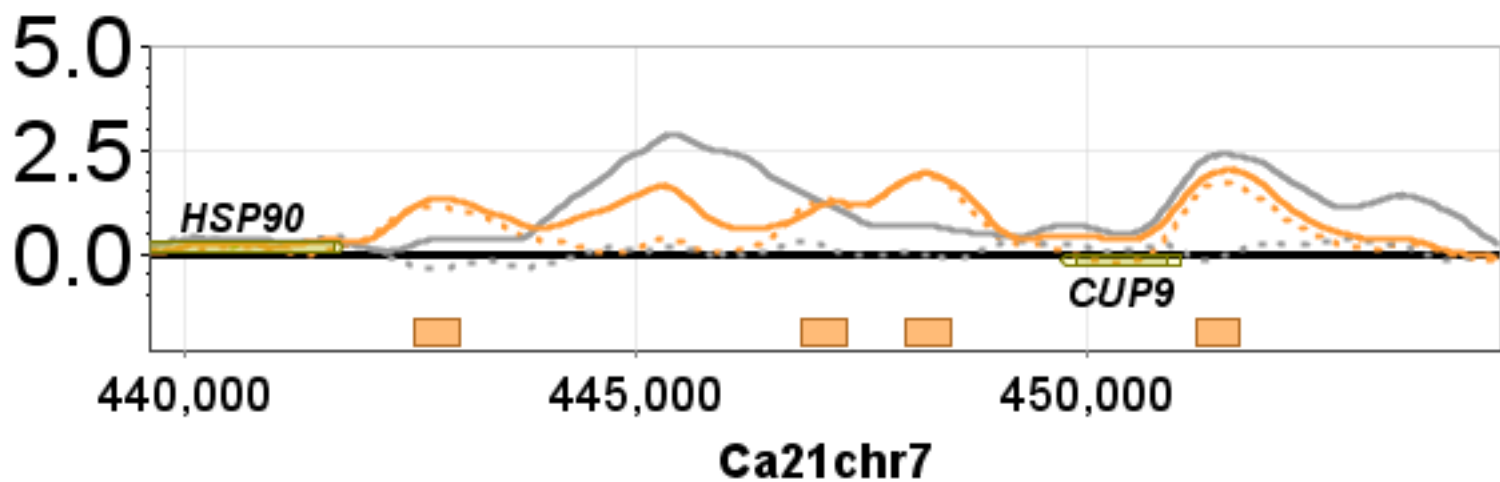

[1.311] Ca21chr3:1665277-1680276 [+] [ntar\_680, orf19.6769, orf19.6770, ntar\_679, orf19.6766]

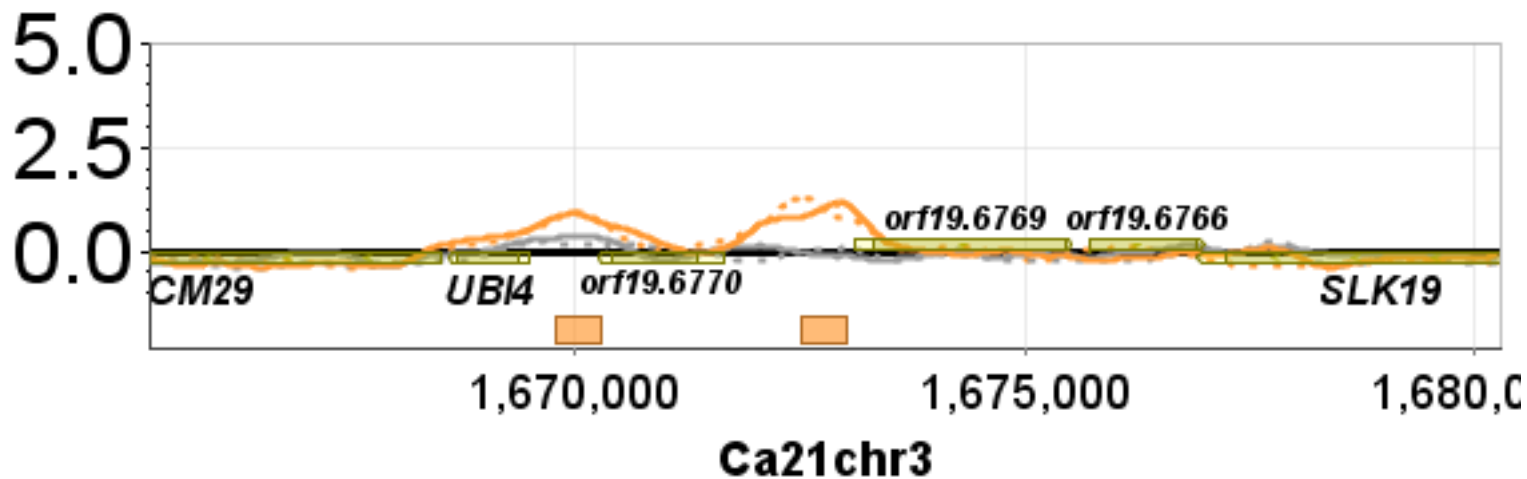

[1.31] Ca21chrR:1462460-1477459 [+] [ARO10, ntar\_1328, orf19.1848.1, orf19.1844, ts(aga)2]

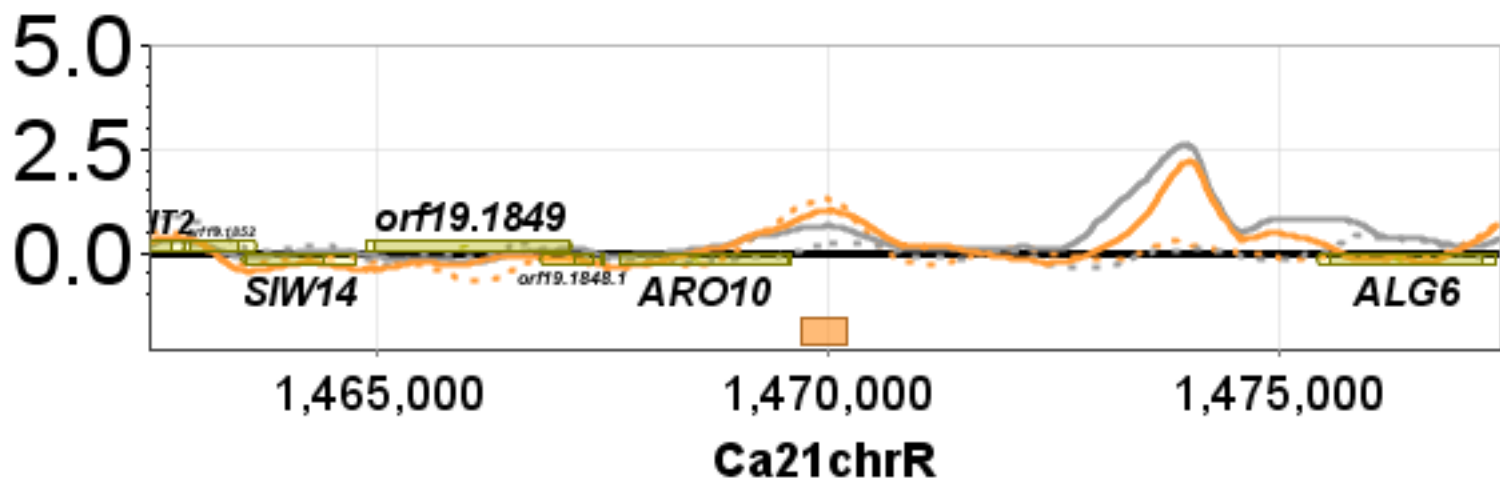

[1.308] Ca21chr5:820266-835265 [+] [FAV2, orf19.1121, orf19.1122, orf19.1123, orf19.1124]

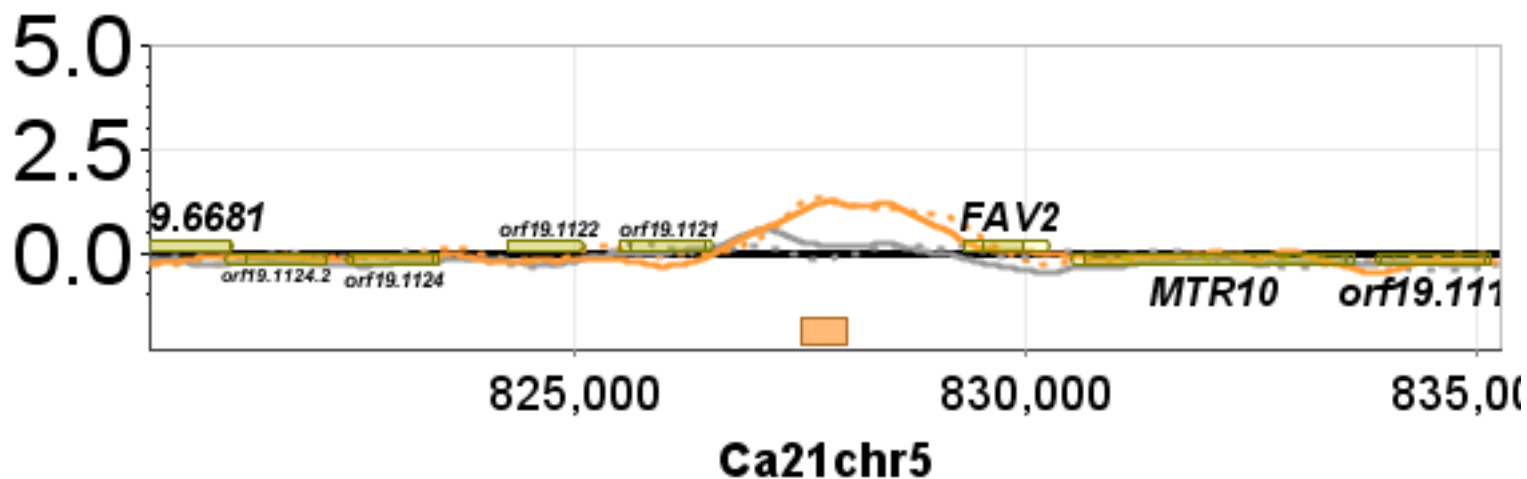

[1.305] Ca21chr7:107387-122386 [+] [GAC1, orf19.7054, ntar\_1413, ntar\_1056, ntar\_1057]

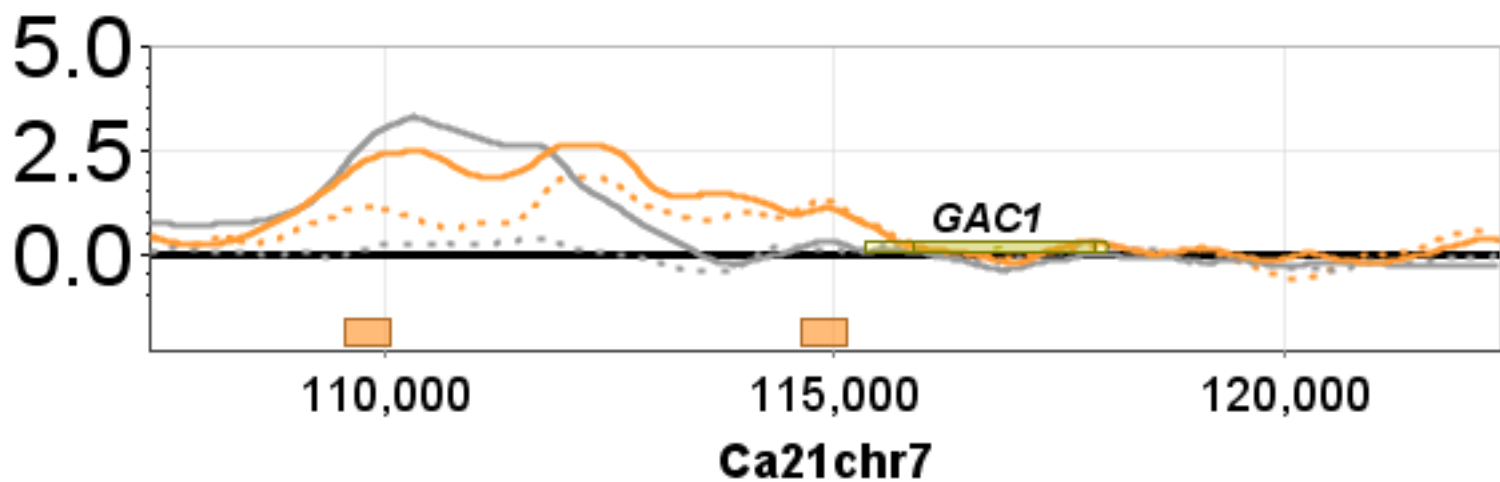

[1.302] Ca21chr5:687959-702958 [+] [ntar\_913, orf19.4342, orf19.4341, orf19.4340.1, orf19.4340]

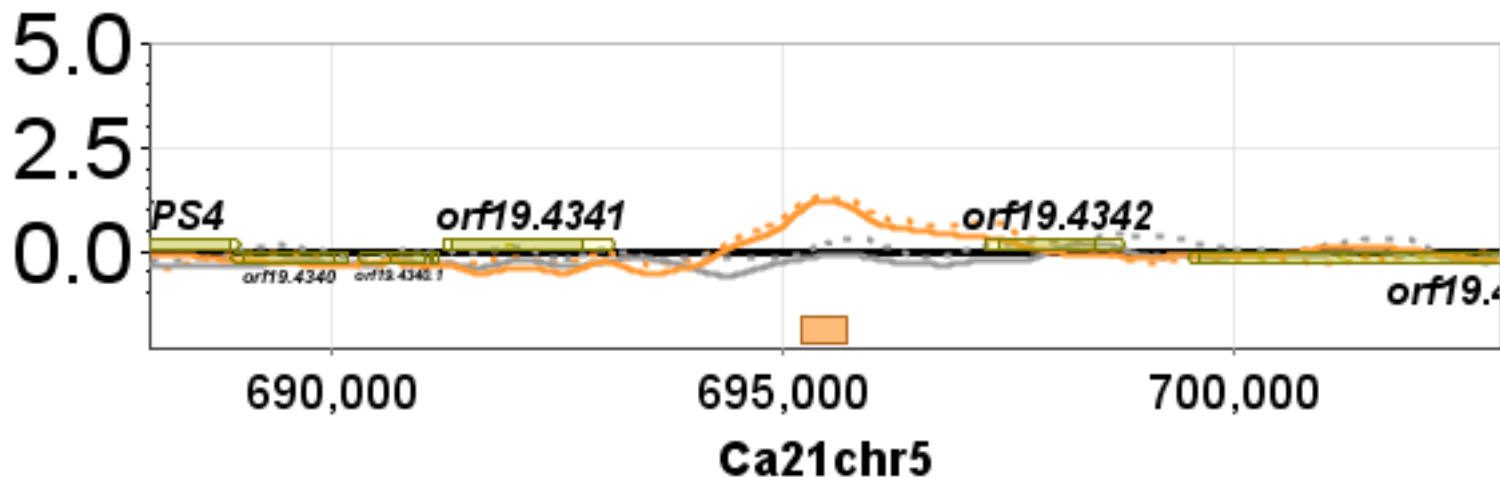

[1.302] Ca21chr6:201382-216381 [+] [CAN2, CIP1, orf19.114, orf19.109, orf19.107]

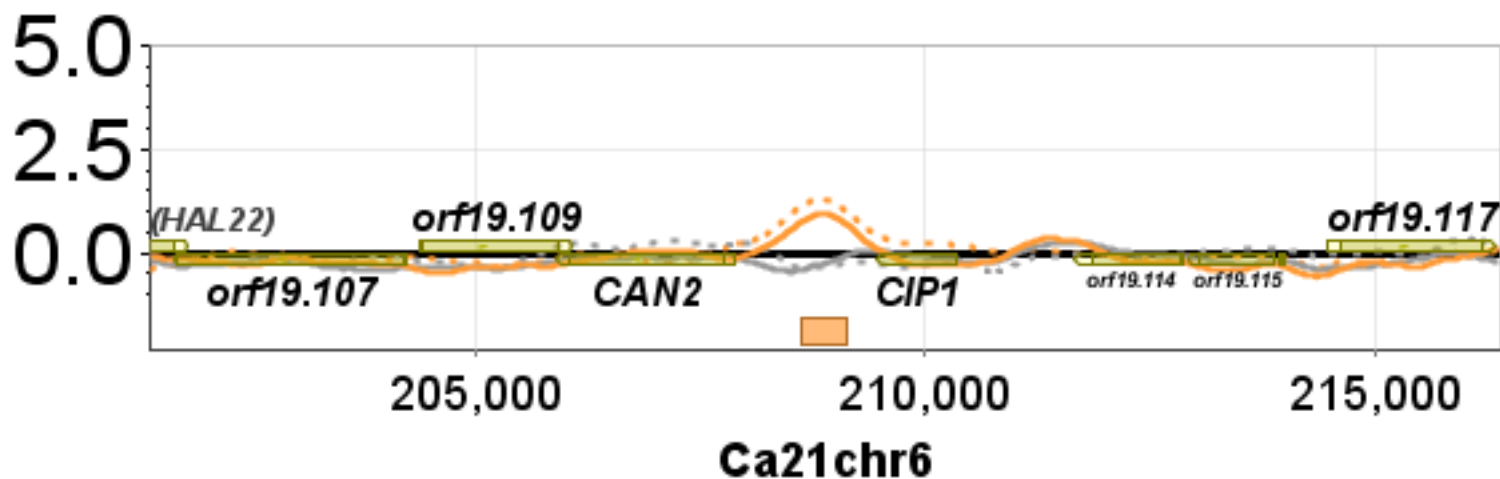

[1.294] Ca21chr1:2284281-2299280 [+] [orf19.4906, orf19.4907, orf19.4908, ntar\_213, ntar\_214]

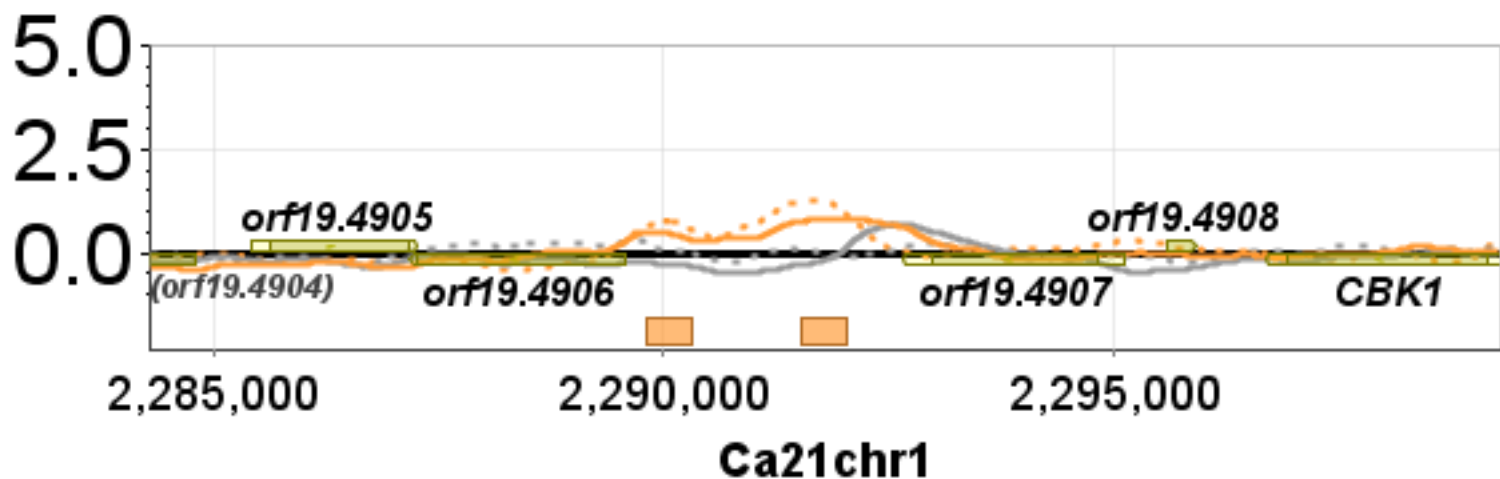

[1.291] Ca21chr1:290628-305627 [+] [orf19.3337, orf19.3336, orf19.3338, orf19.3335, ntar\_28]

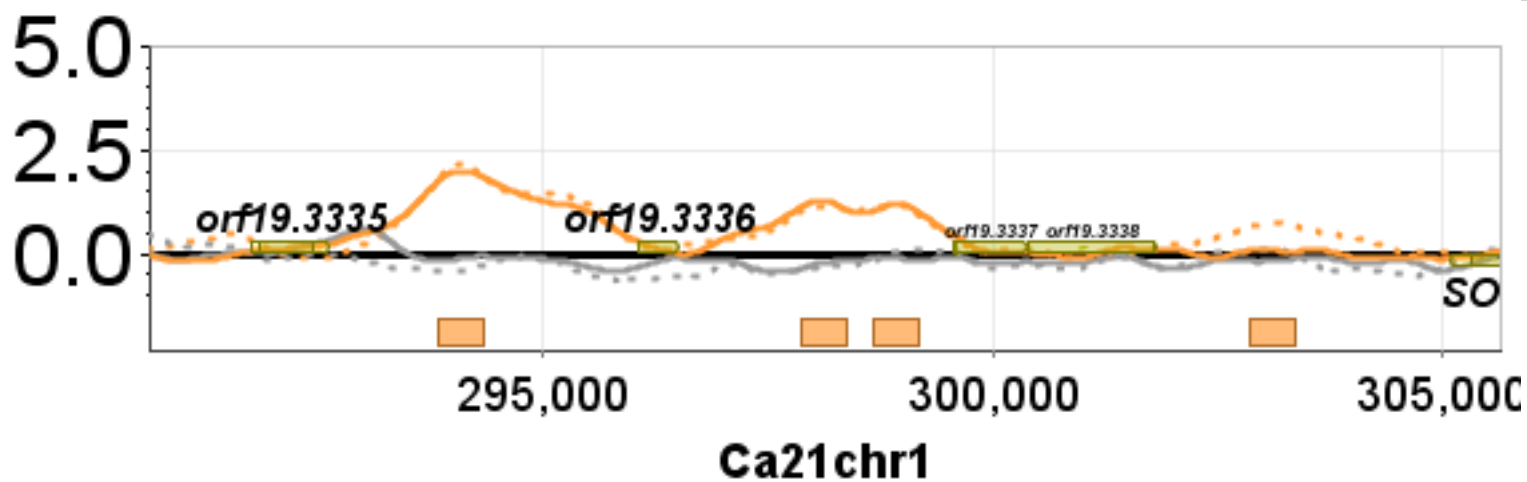

[1.287] Ca21chr3:239393-254392 [+] [ntar\_543, ntar\_544, orf19.3156, orf19.3158, UTP20]

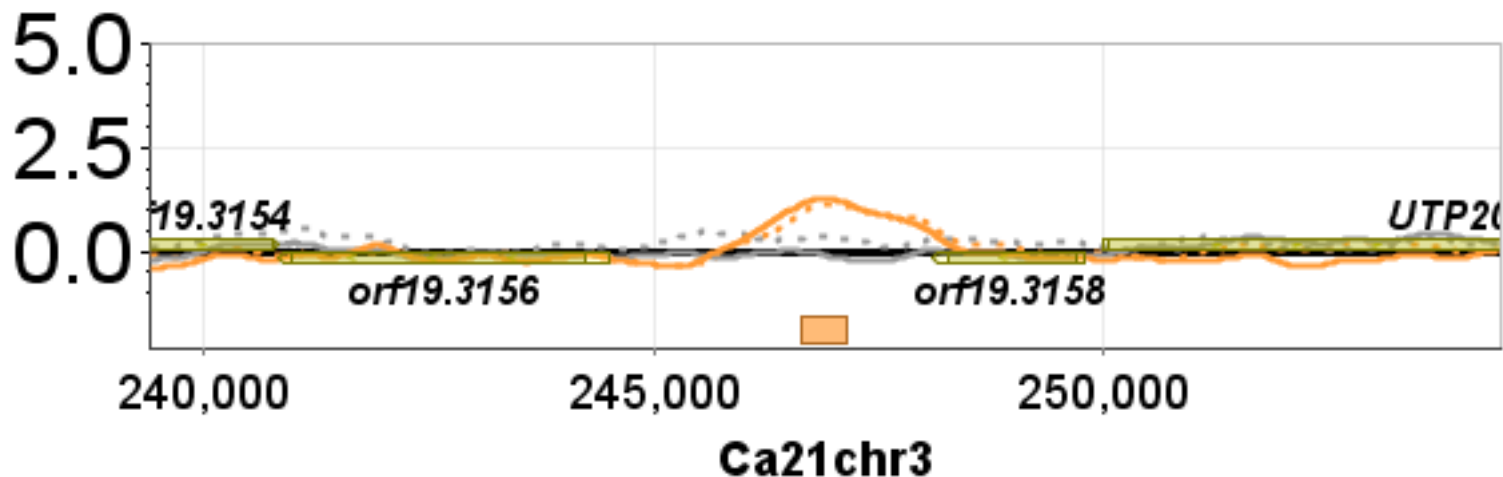

[1.286] Ca21chrR:1035601-1050600 [+] [orf19.6311, ntar\_1270, RPS3, orf19.6310, MNT4]

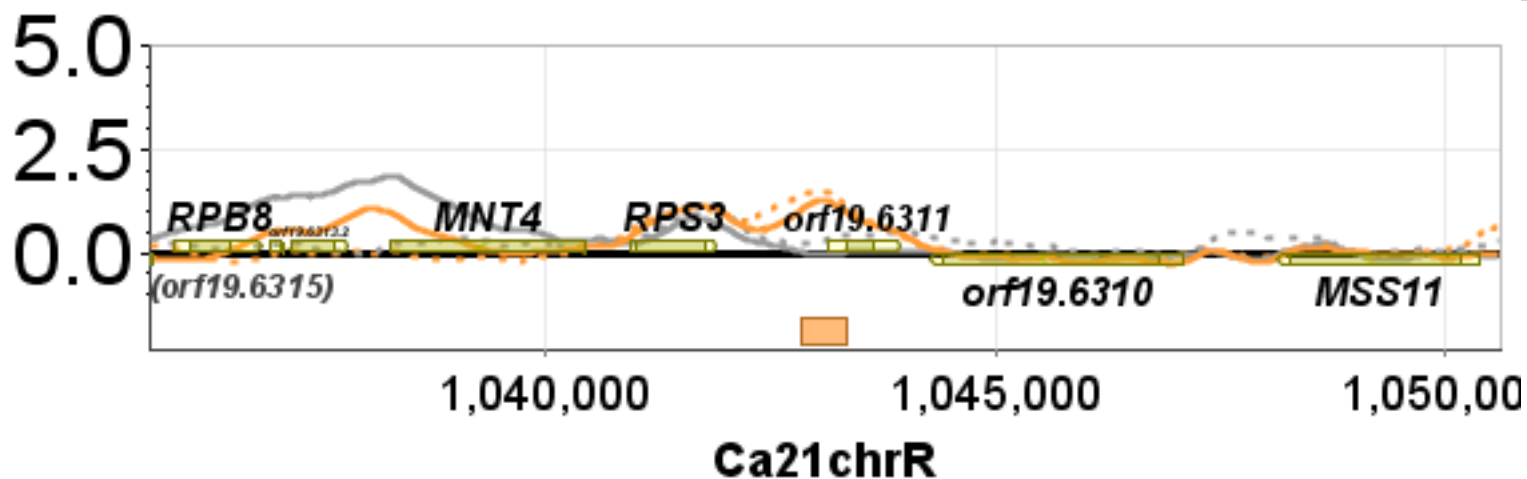

[1.284] Ca21chr1:2395120-2410119 [+] [orf19.2332, orf19.2333, ADA2, RPS17B, BIG1]

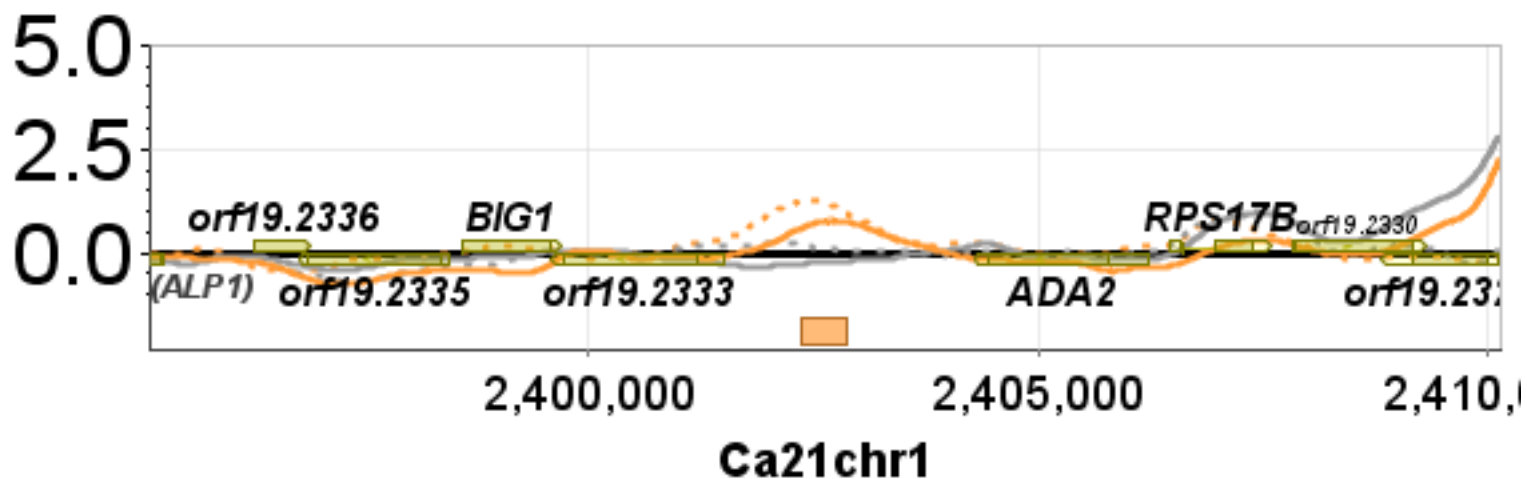

[1.284] Ca21chr2:447031-462030 [+] [orf19.1544, OPI1, orf19.1545, orf19.1546, ntar\_329]

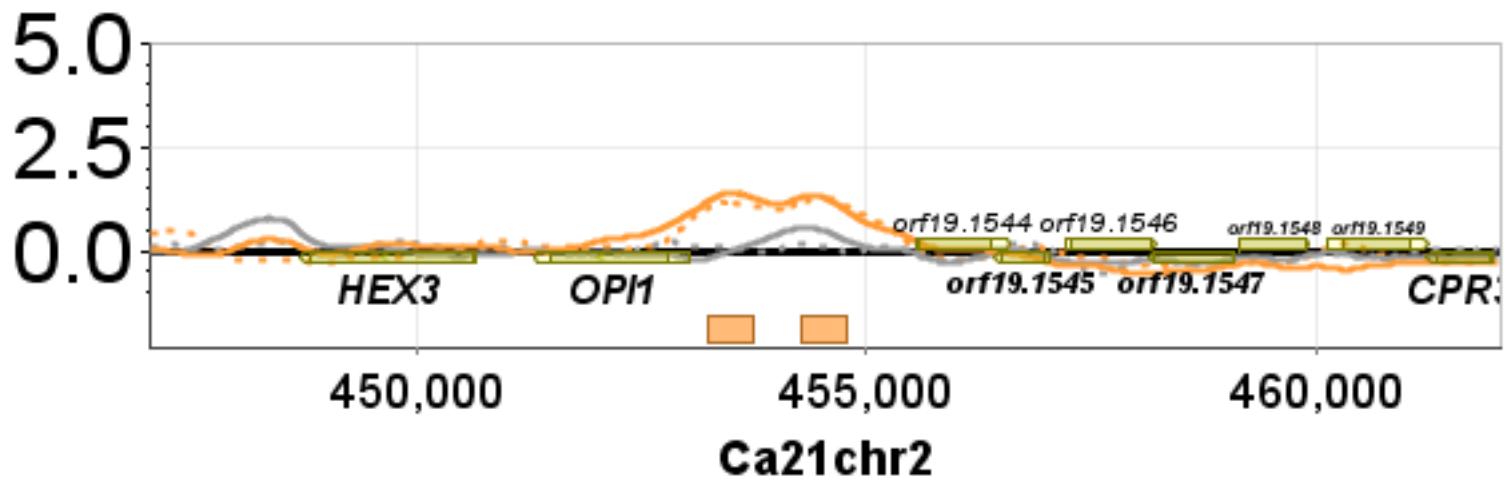

[1.283] Ca21chr2:1194135-1209134 [+] [ntar\_397, orf19.5210, orf19.5210.1, orf19.5209, IDP1]

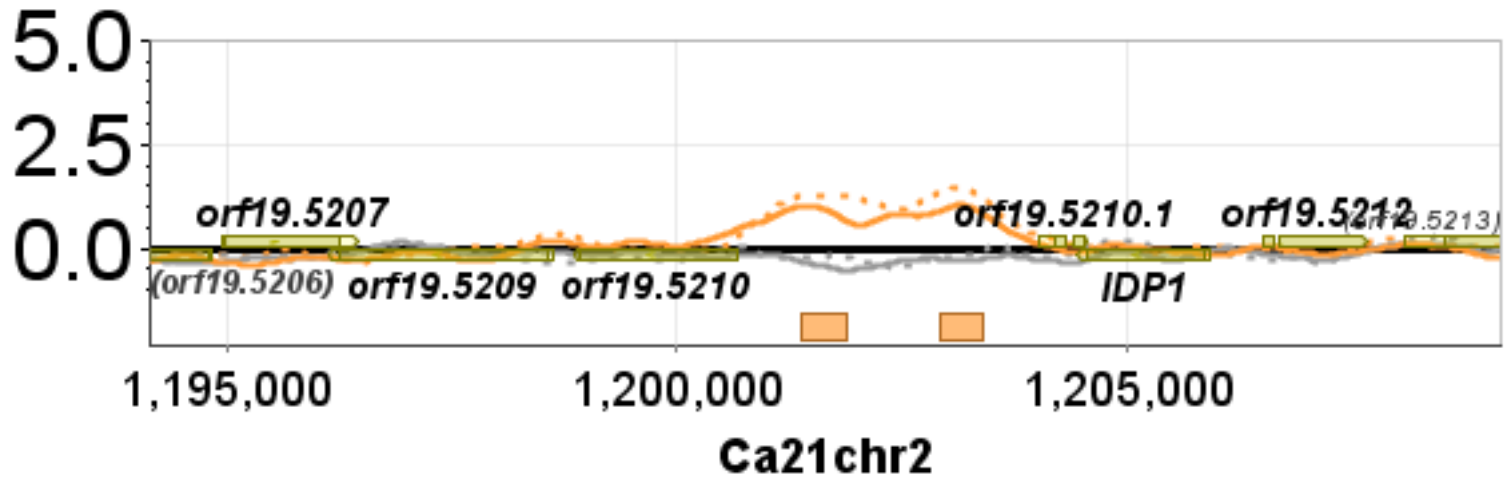

[1.272] Ca21chr2:1797962-1812961 [+] [BUD20, PIR1, orf19.217, orf19.216.1, orf19.223]

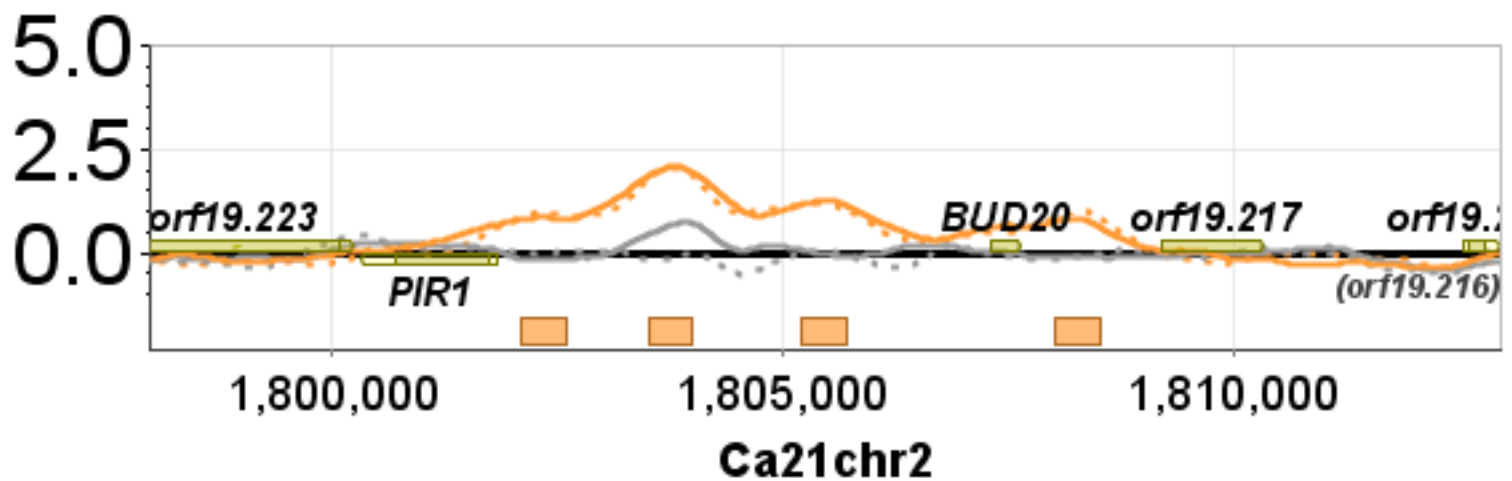

[1.272] Ca21chrR:2069792-2084791 [+] [ntar\_1394.2, ntar\_1394.1, PMT5, IFA14, orf19.7548]

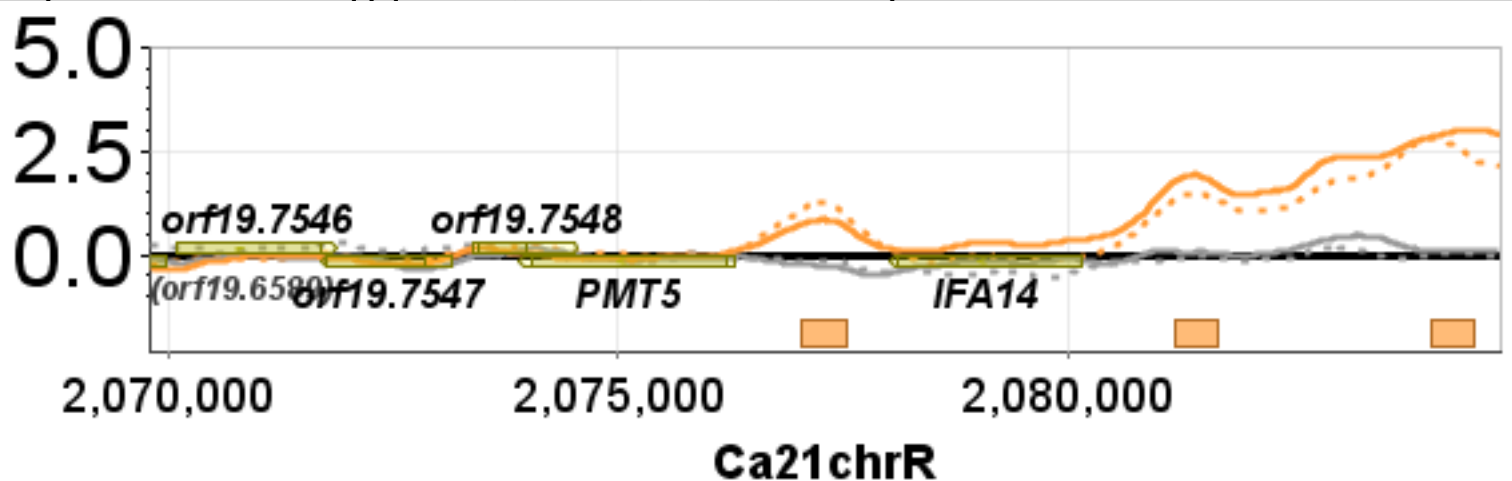



[1.268] Ca21chr1:1226073-1241072 [+] [orf19.2458, orf19.2457, orf19.2459, orf19.2455]

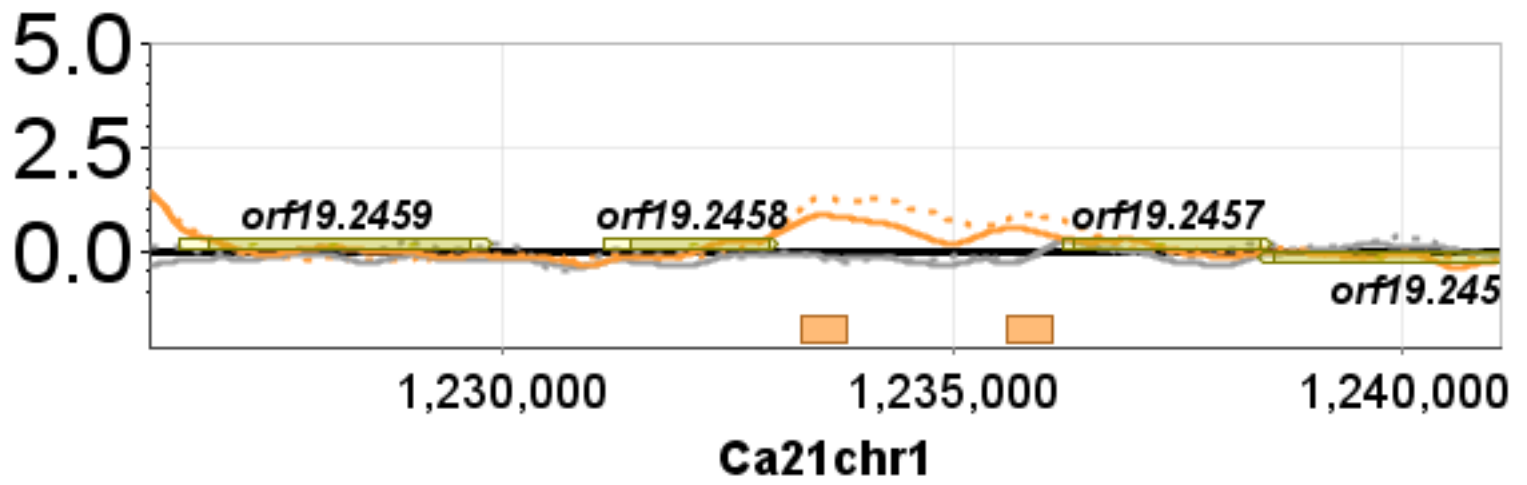

[1.256] Ca21chr1:2614678-2629677 [+] [ntar\_246, orf19.5268, orf19.5269, orf19.5267, orf19.5269.1]

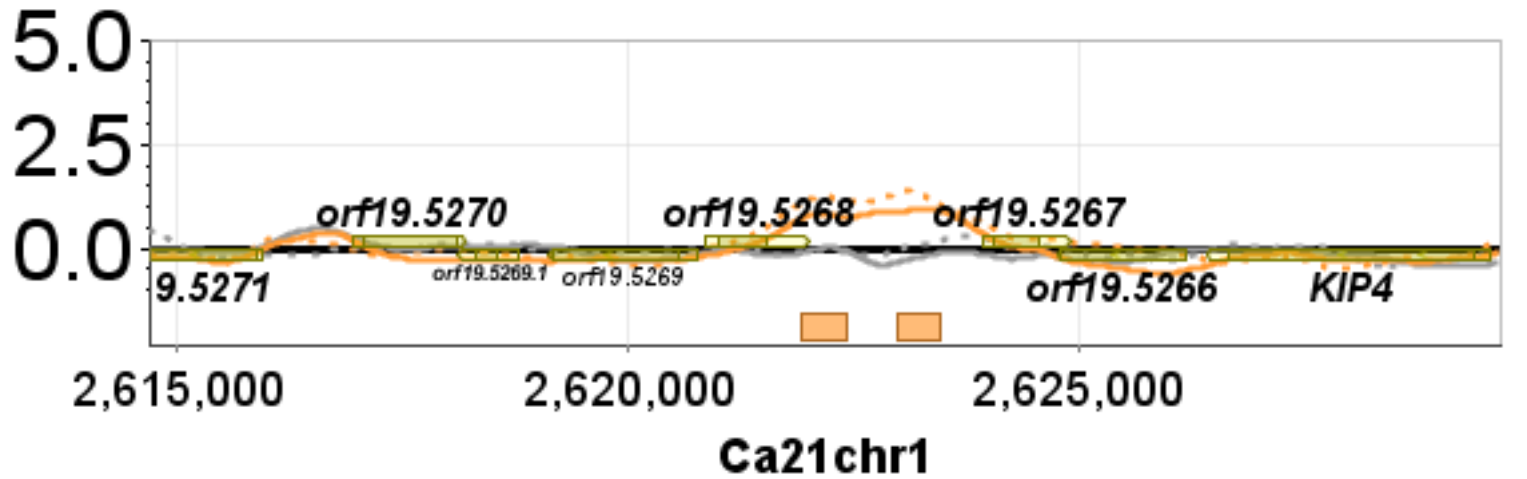

[1.252] Ca21chr5:767104-782103 [+] [ntar\_917, ntar\_918, orf19.2638, orf19.2637, te(uuc)5]

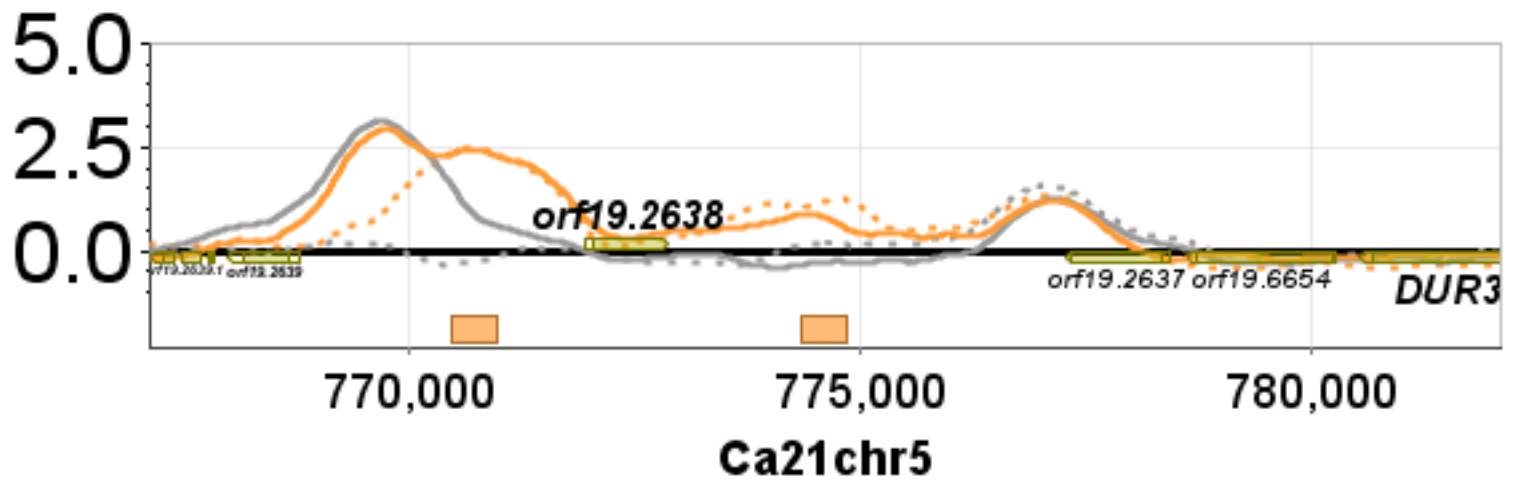

[1.246] Ca21chrR:106859-121858 [+] [orf19.7489, orf19.7488, orf19.7487, ntar\_1159, ntar\_1160]

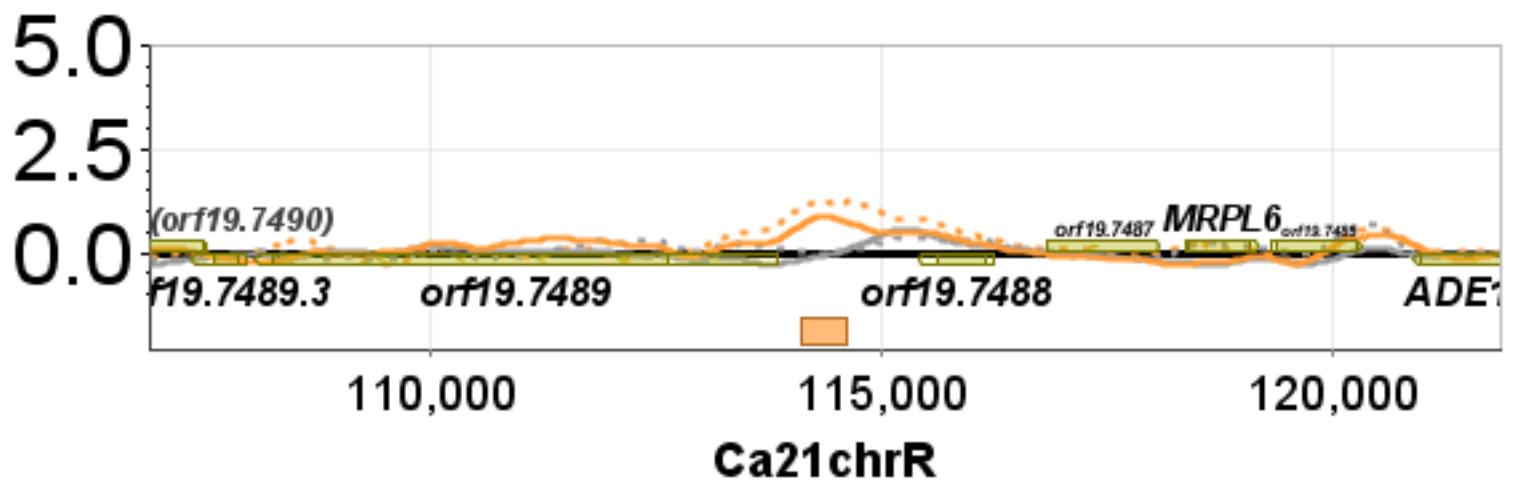

[1.241] Ca21chr3:963704-978703 [+] [STP3, orf19.5917.3, orf19.5915, orf19.5918, MEA1]

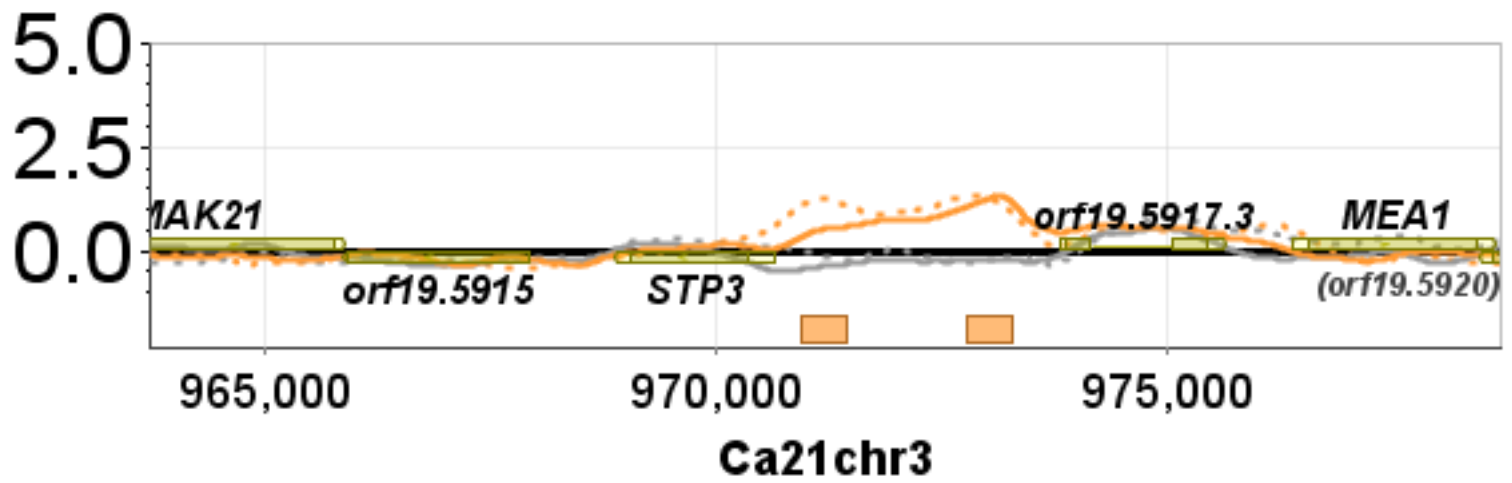

[1.235] Ca21chr1:913759-928758 [+] [orf19.6840, orf19.6838, ntar\_90, orf19.6837, orf19.5194.1]

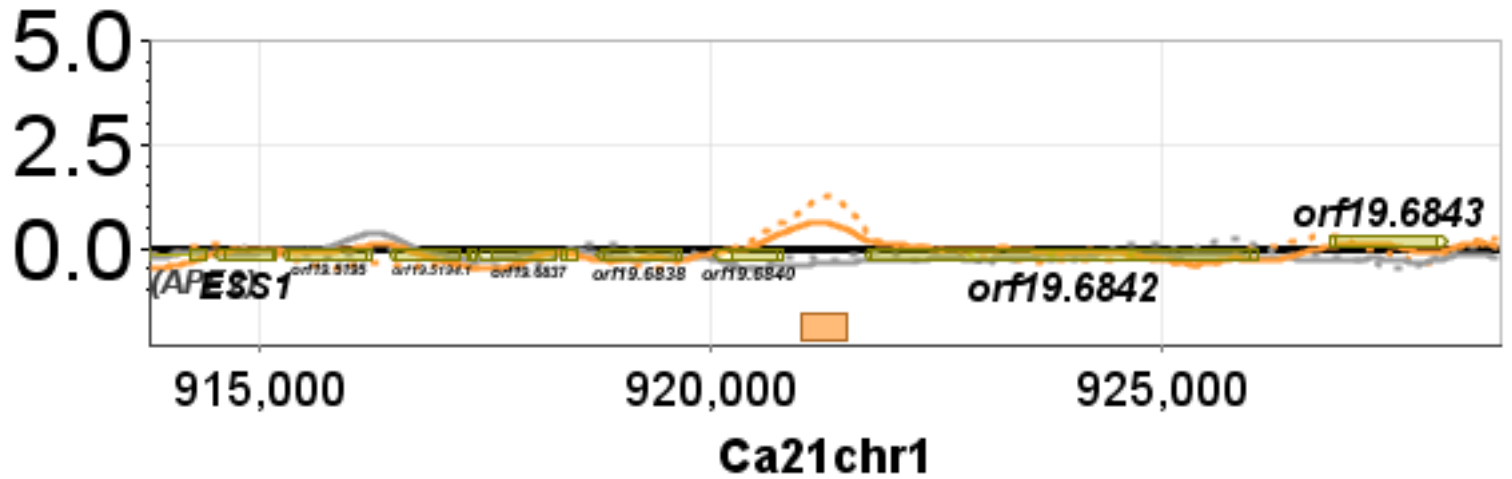

[1.234] Ca21chrR:1470475-1485474 [+] [ALG6, orf19.1842, ntar\_1329, ts(aga)2, orf19.1844]

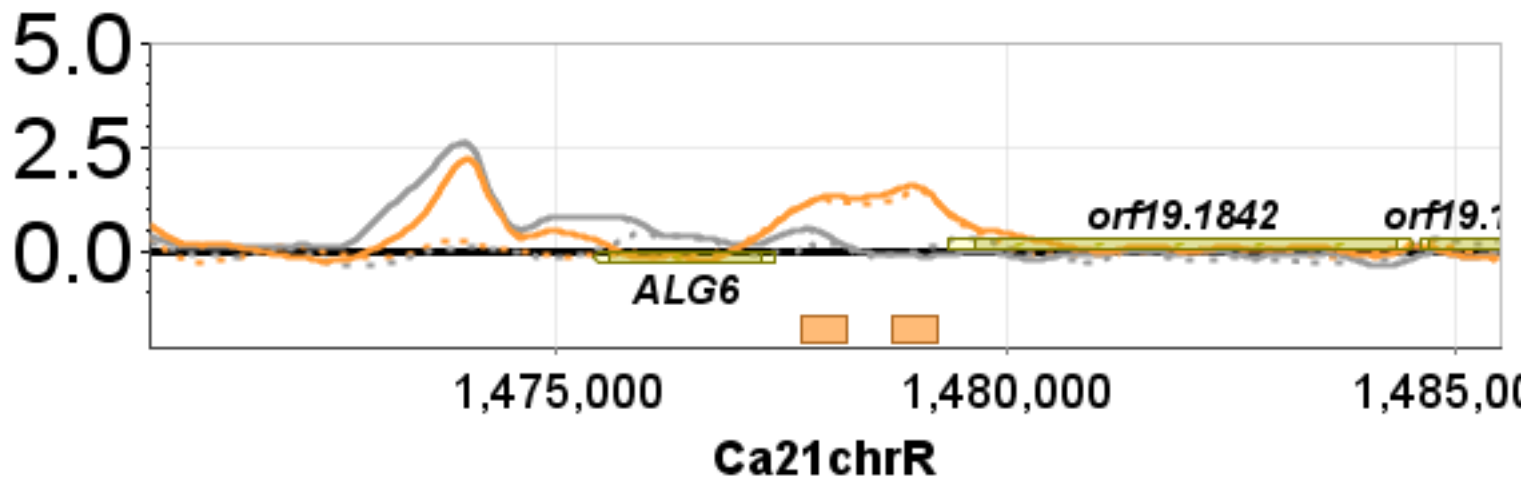

[1.228] Ca21chr4:85494-100493 [+] [orf19.4189, orf19.4190, RLP24, NMD5, ntar\_709]

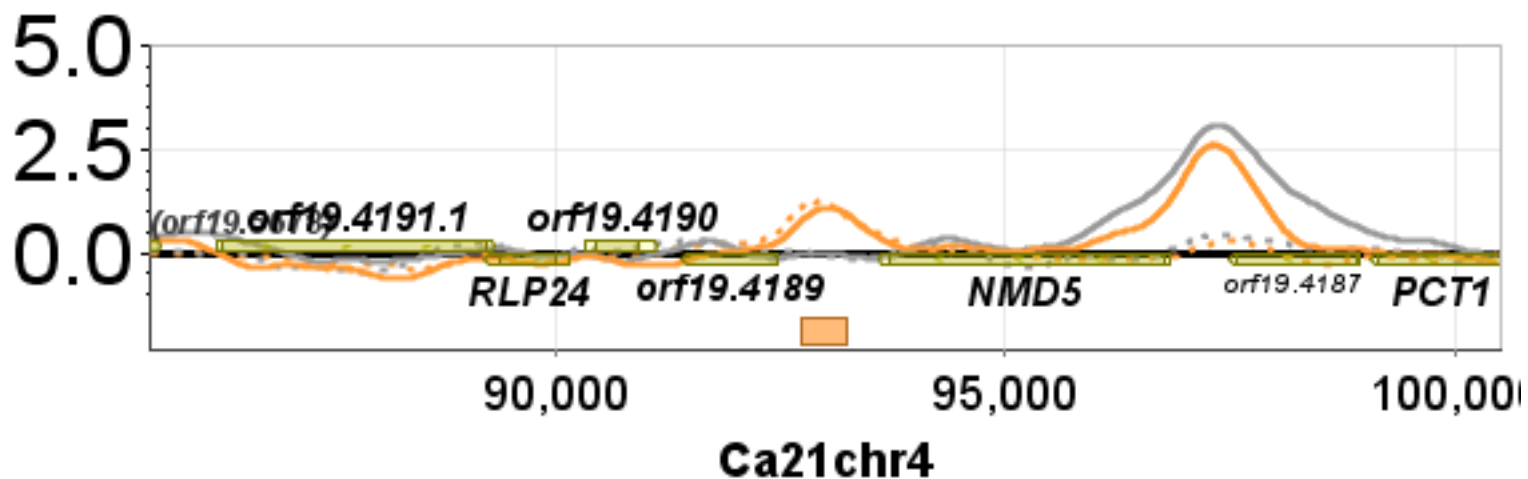

[1.227] Ca21chr1:984007-999006 [+] [ntar\_96, SYG1, ERG3, IFE1, orf19.764]

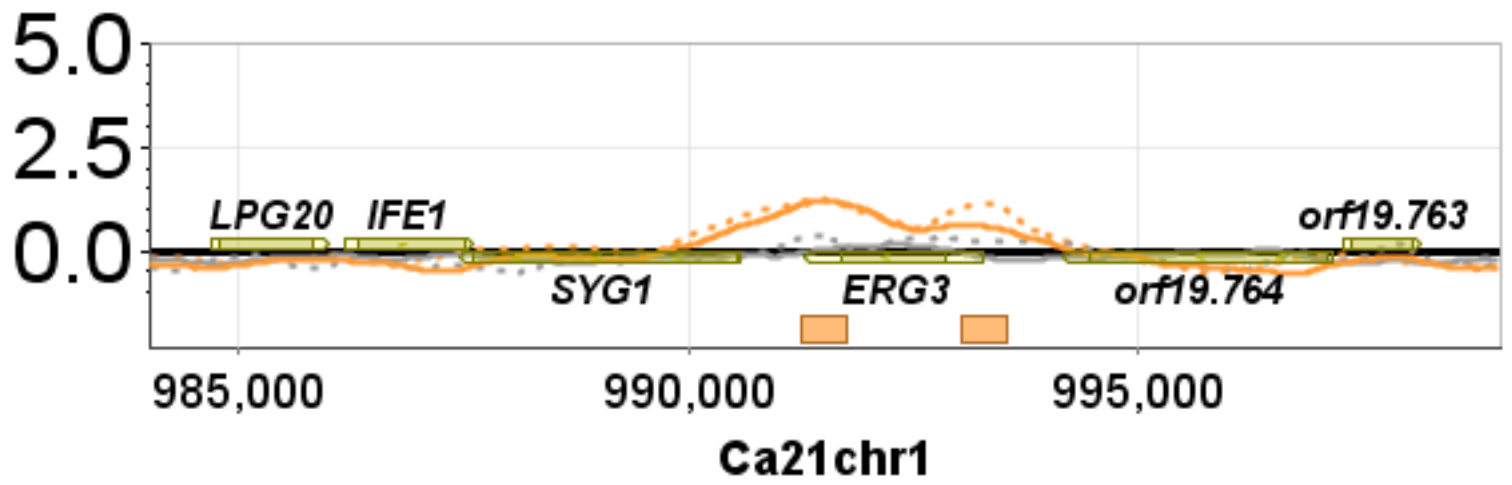

[1.221] Ca21chr1:1565924-1580923 [+] [ntar\_140, ntar\_139, ntar\_138, tl(aaq)2, RME1]

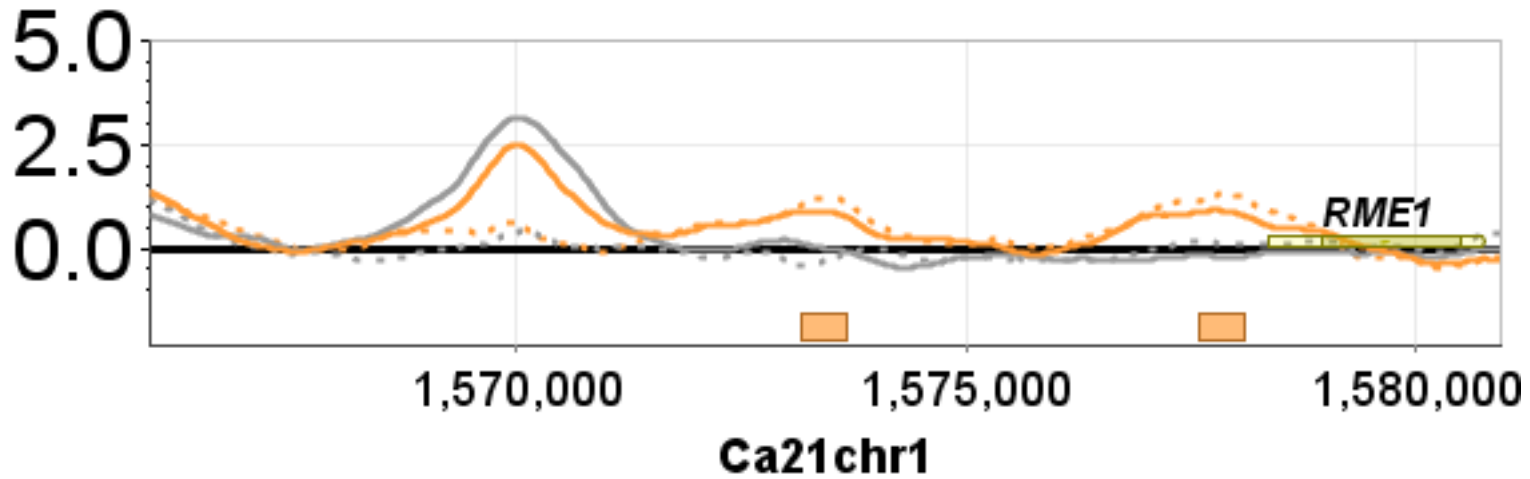

[1.22] Ca21chr4:1519048-1534047 [+] [CCT6, orf19.3125, CZF1, orf19.3124, orf19.3123.2]

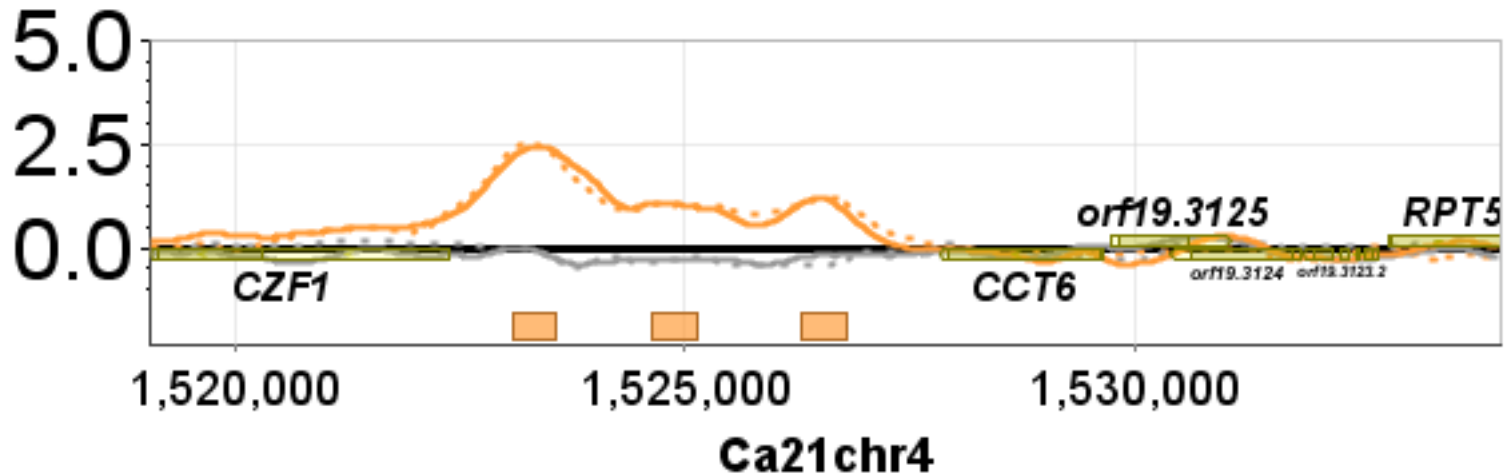

[1.215] Ca21chr2:929651-944650 [+] [orf19.4504, ntar\_370, ntar\_371, orf19.4503, ADH3]

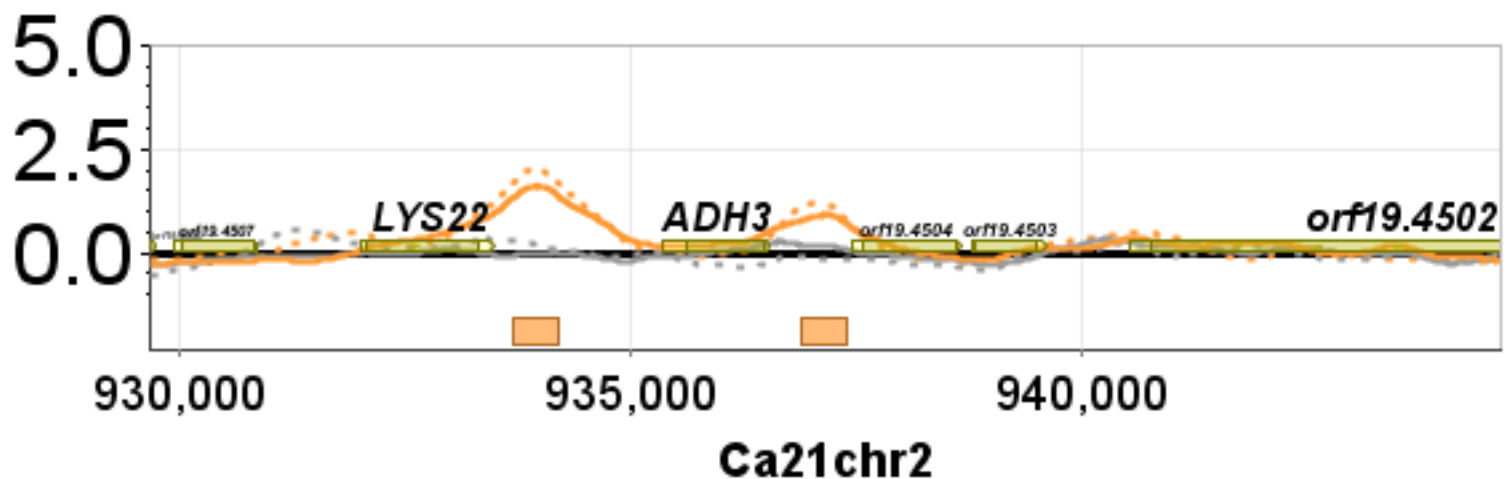

[1.209] Ca21chr1:1492001-1507000 [+] [RBT4, orf19.6203, orf19.6205, orf19.6199]

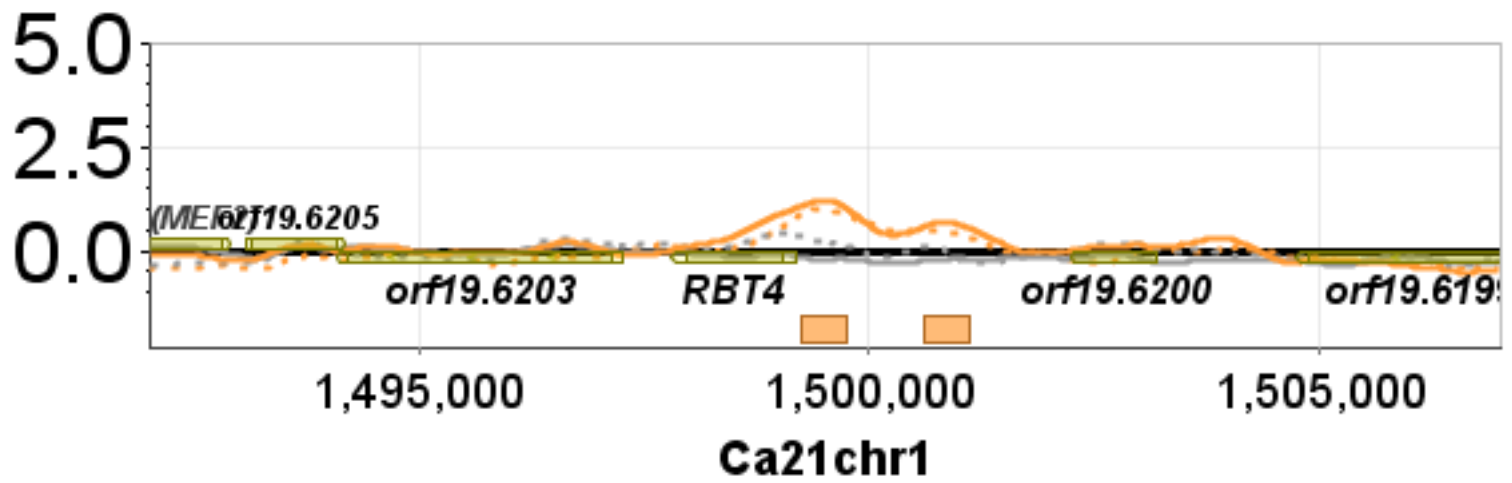

[1.206] Ca21chr1:291435-306434 [+] [orf19.3337, orf19.3338, orf19.3336, SOD2, orf19.3335]

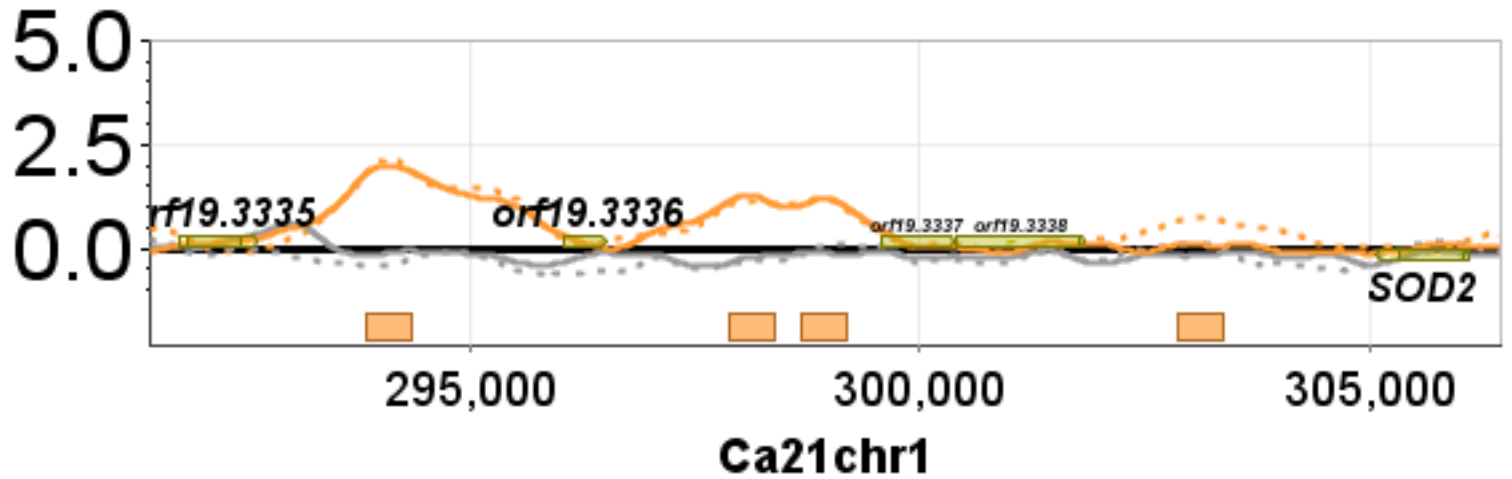

[1.202] Ca21chr6:822145-837144 [+] [orf19.5757, SAL6, orf19.5755, ntar\_1032, orf19.5754]

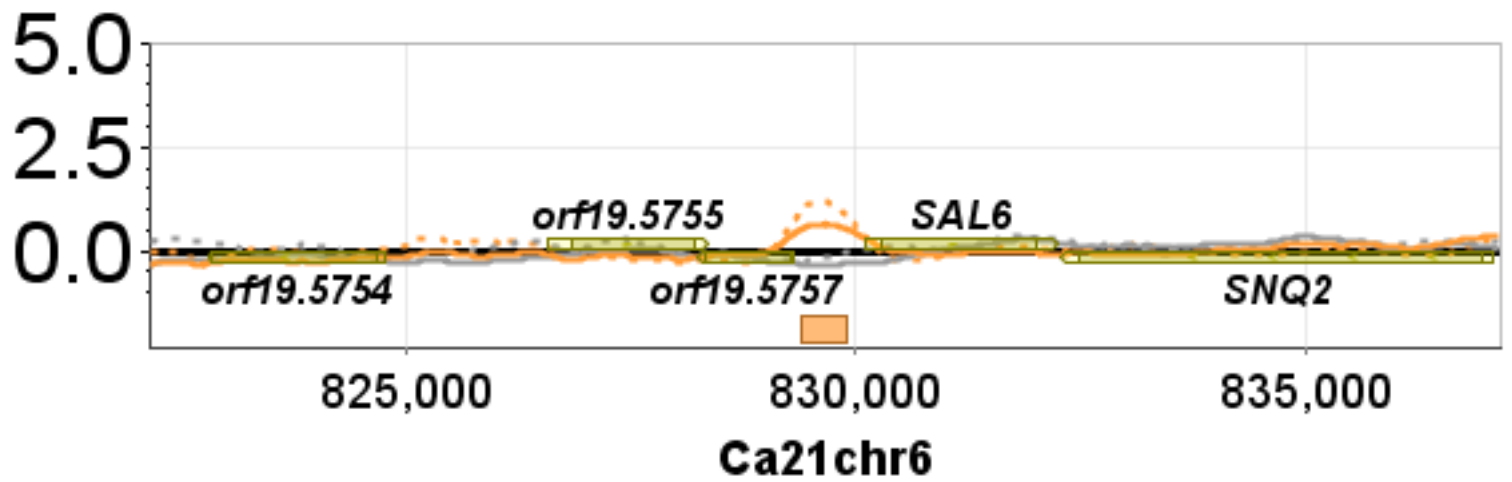

[1.197] Ca21chr3:1465421-1480420 [+] [th(gug)3, ntar\_658, ntar\_659, AAF1, GLG2]

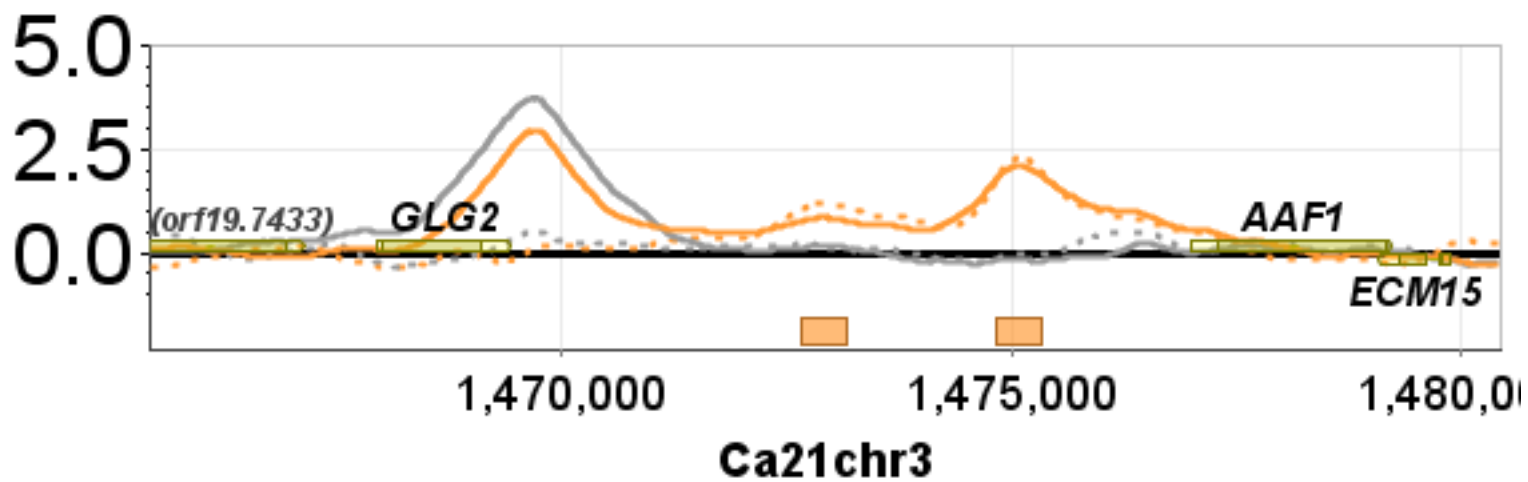

[1.195] Ca21chr2:468394-483393 [+] [ECM3, orf19.1562, ntar\_330, ntar\_331, orf19.1564]

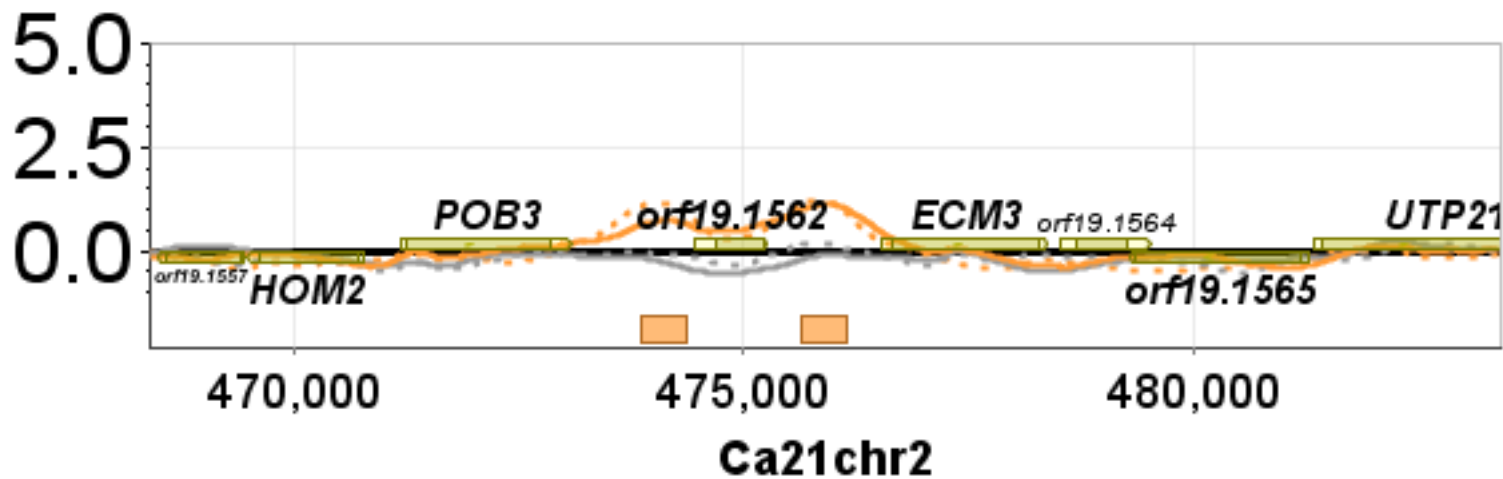

[1.193] Ca21chr1:2186842-2201841 [+] [SFU1, SWE1, DBP3, ERO1]

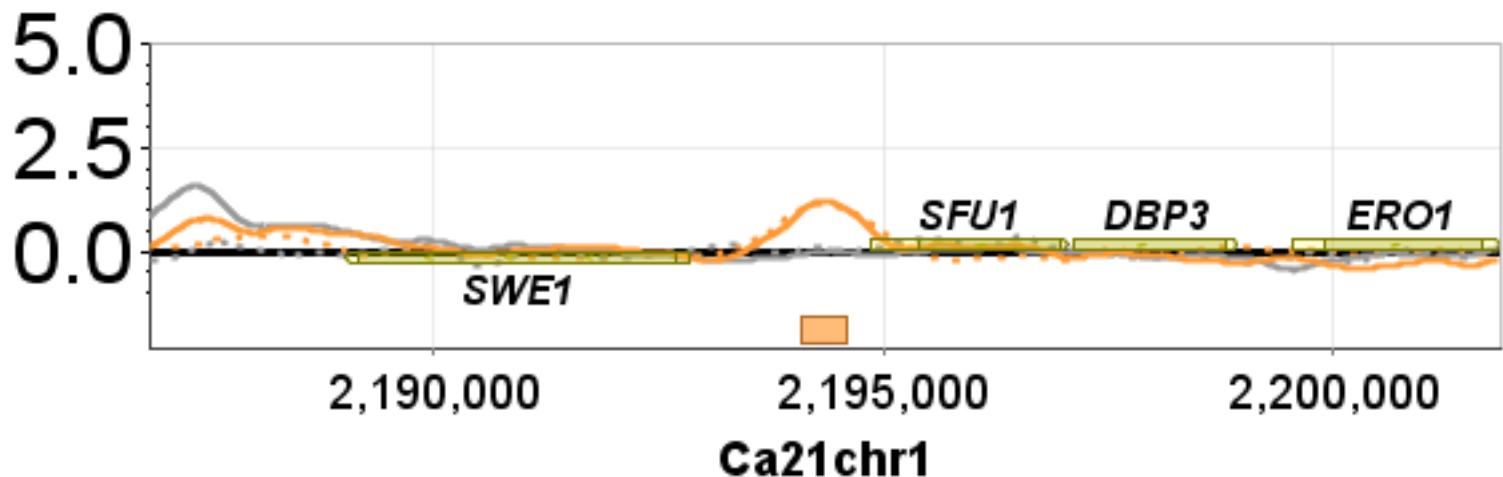

[1.19] Ca21chr1:527419-542418 [+] [DIP5, ntar\_55, tr(ucu)4, orf19.2943.5, ntar\_54]

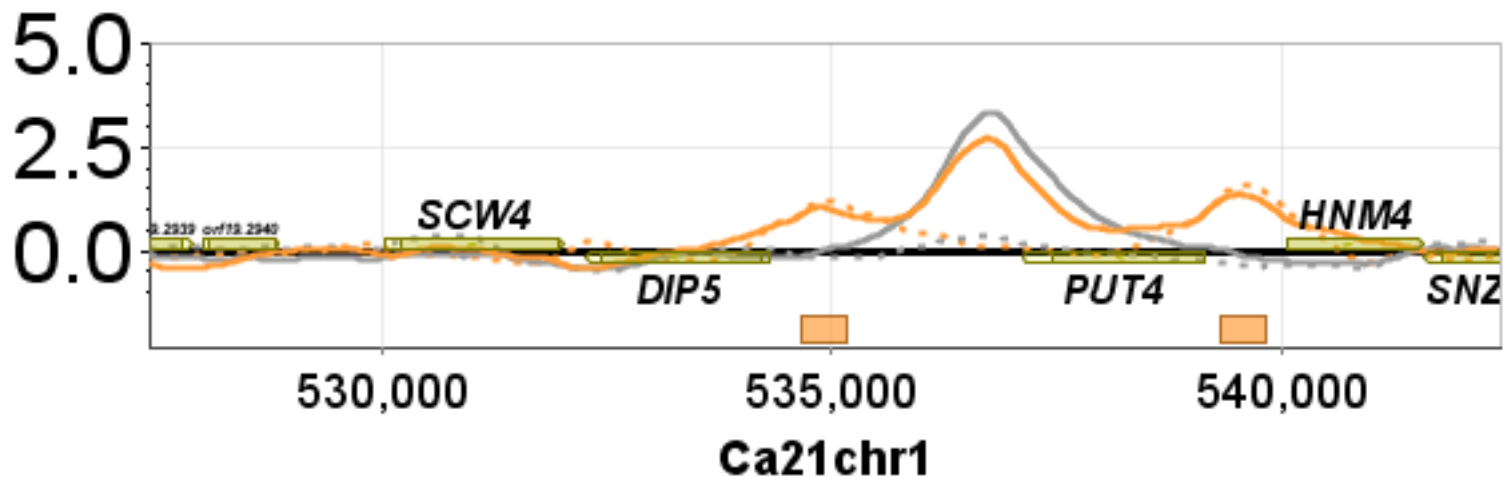

[1.19] Ca21chrR:1367270-1382269 [+] [orf19.721, BCR1, GST3, orf19.719, orf19.725]

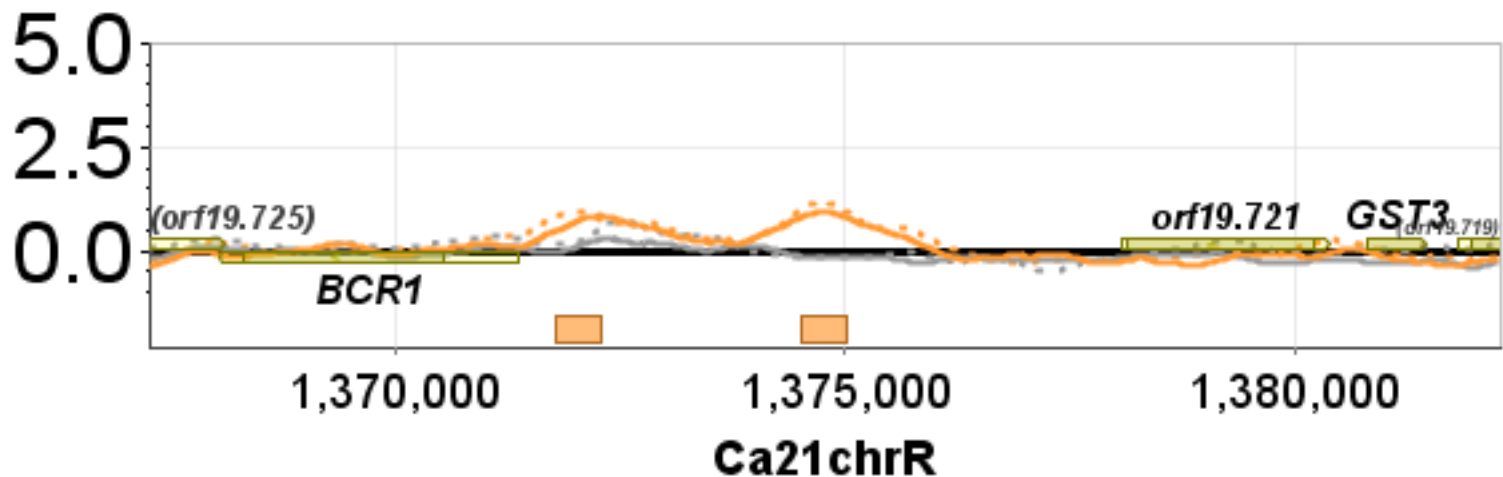

[1.188] Ca21chr5:918728-933727 [+] [ntar\_941, orf19.3898, SDC1, orf19.3897, orf19.3900]

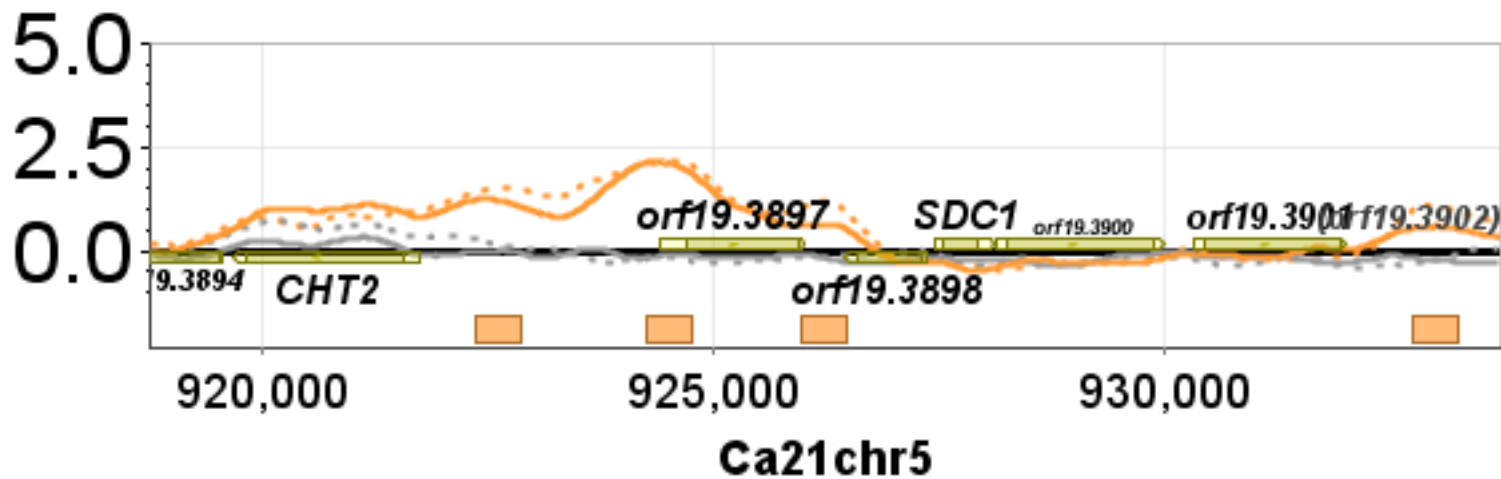

[1.185] Ca21chrR:1252129-1267128 [+] [ntar\_1291, ntar\_1292, SFL1, orf19.457]

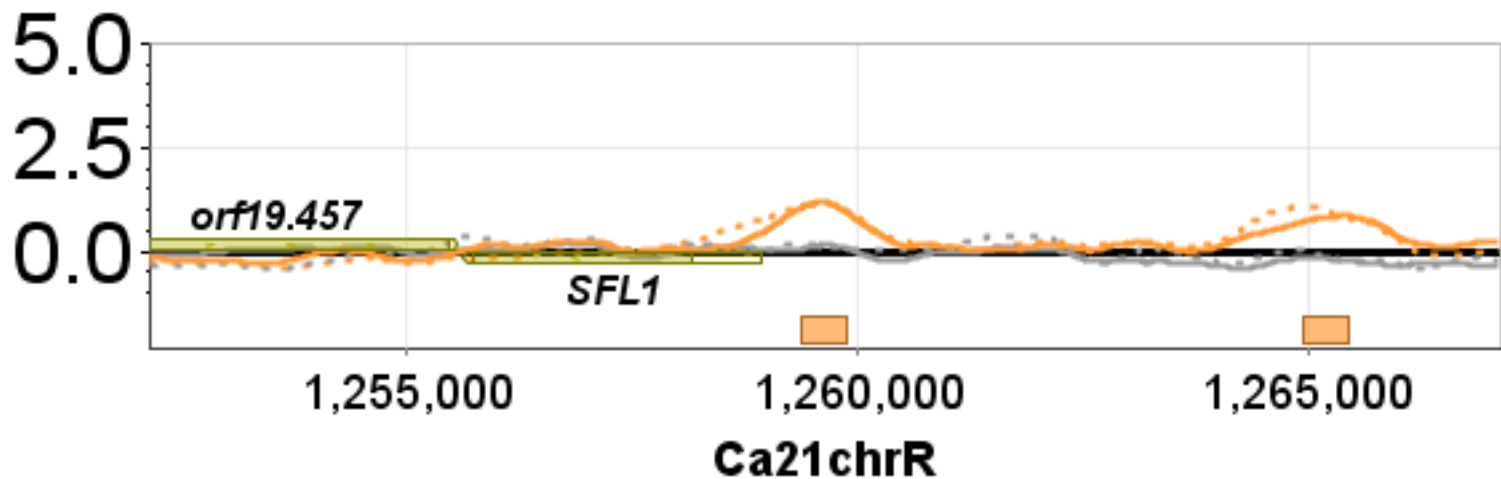

[1.183] Ca21chr4:1449824-1464823 [+] [ntar\_833, MNN4, ntar\_832, ntar\_831, ntar\_830]

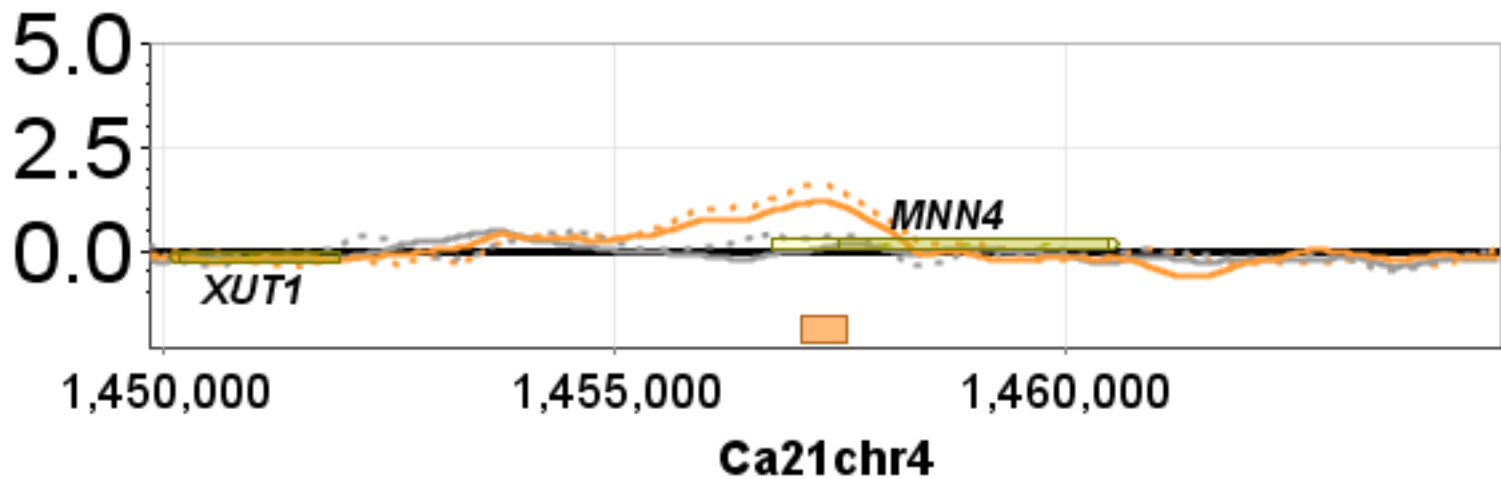

[1.182] Ca21chr3:1169052-1184051 [+] [ntar\_627, ntar\_626, orf19.6968, USO6, orf19.6966]

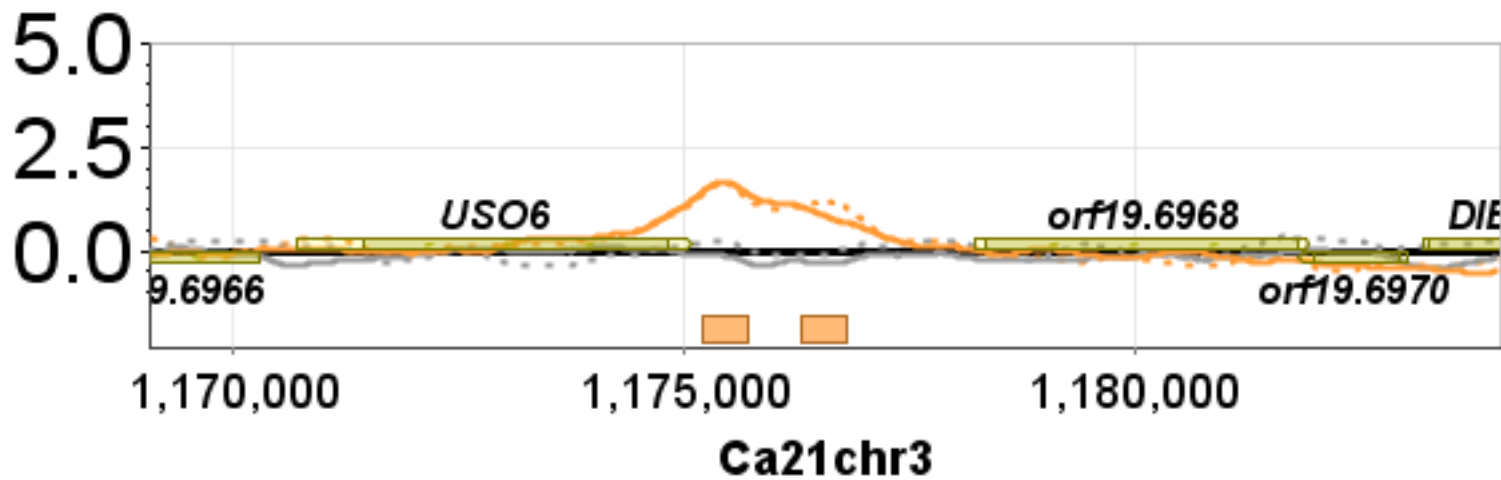

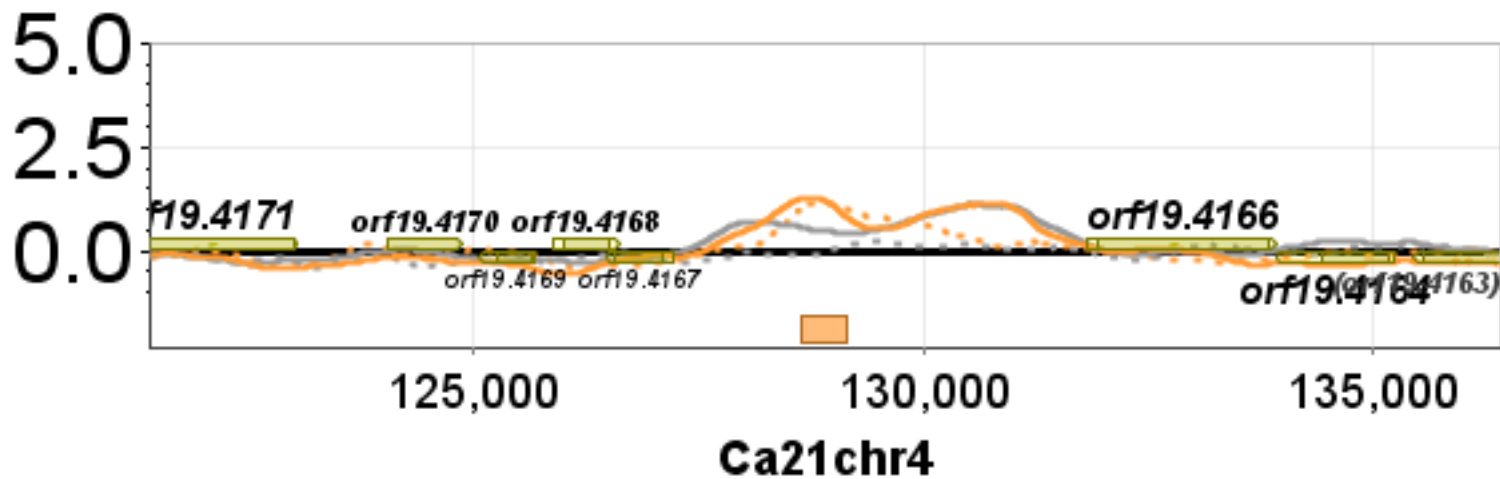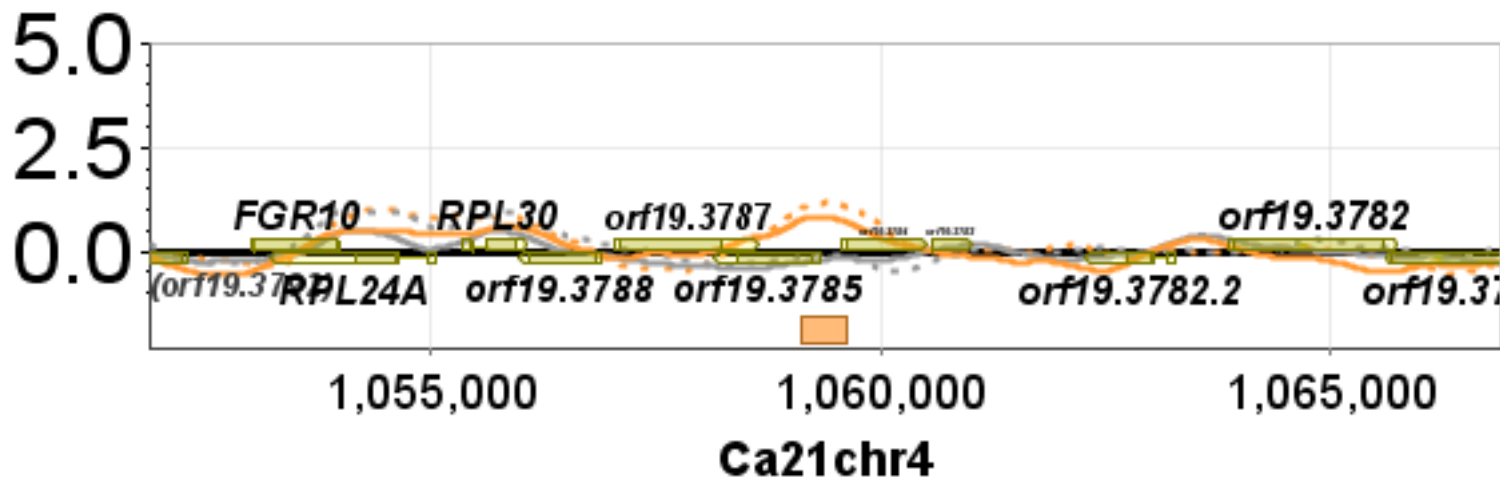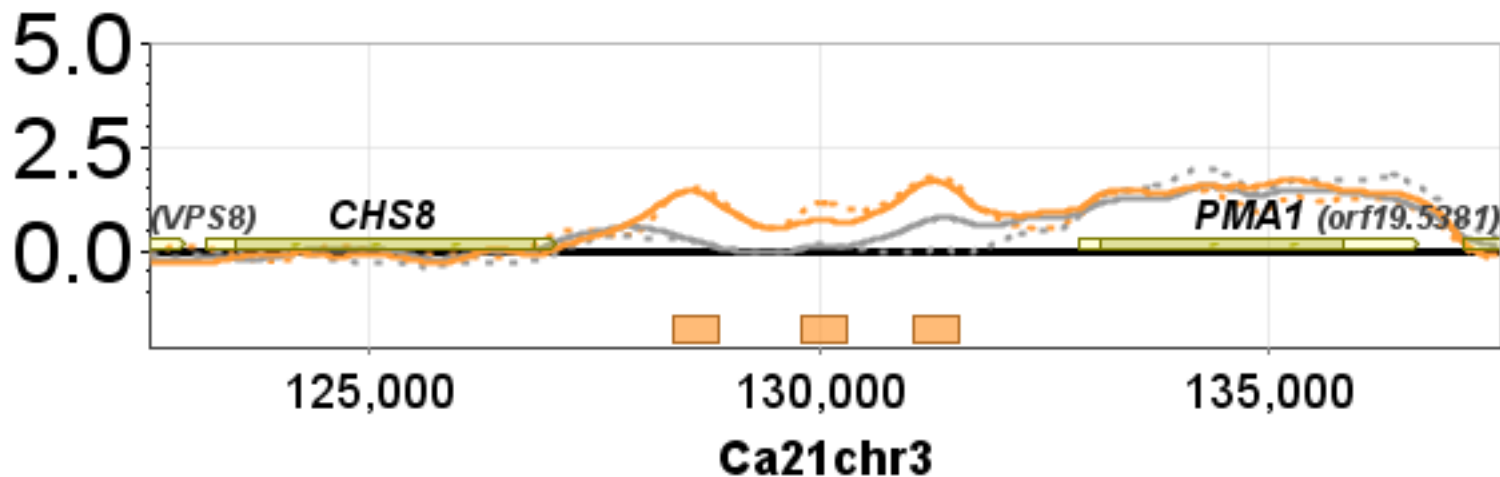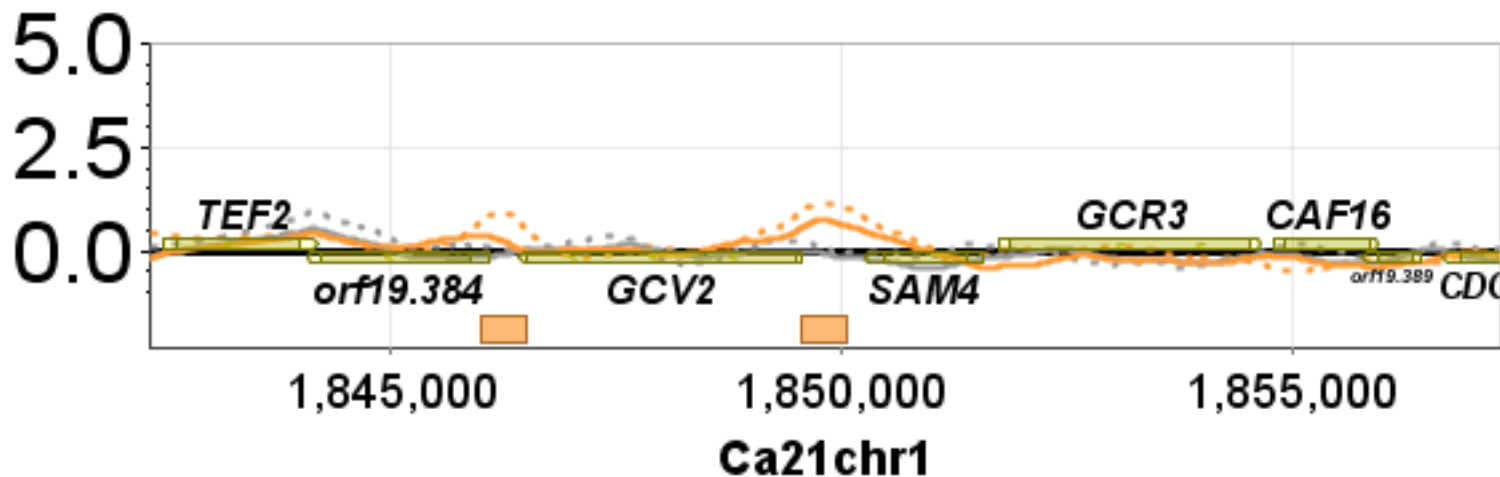

[1.158] Ca21chr1:2307072-2322071 [+] [GLY1, orf19.988, orf19.985, orf19.989, DJP1]

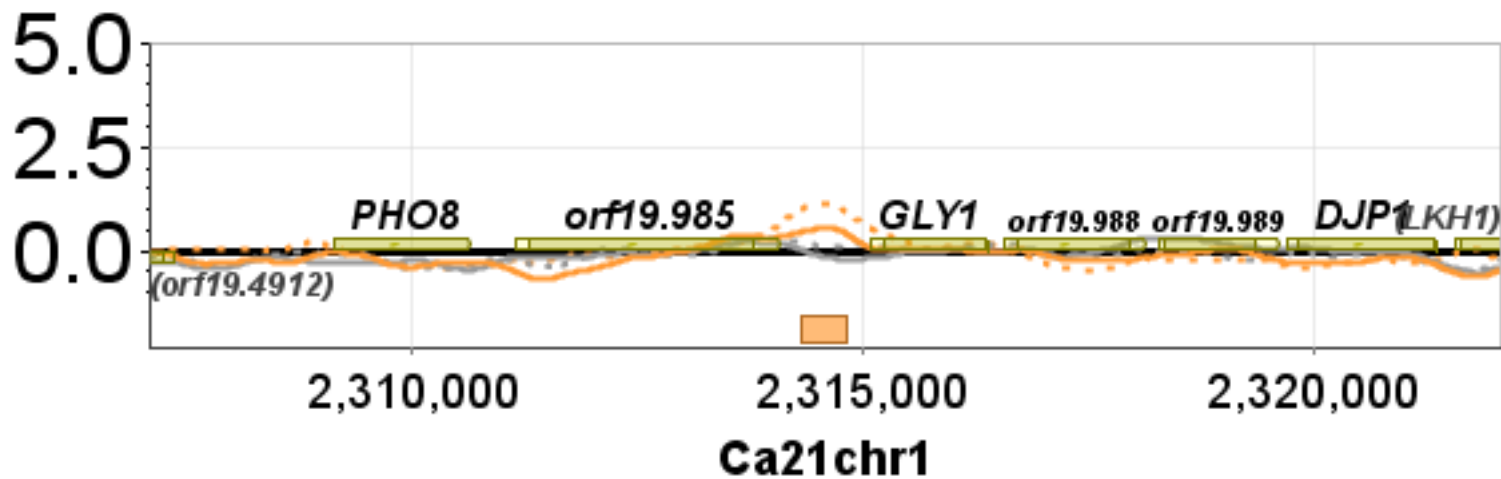

[1.149] Ca21chr1:985774-1000773 [+] [ERG3, ntar\_96, SYG1, orf19.764, orf19.763]

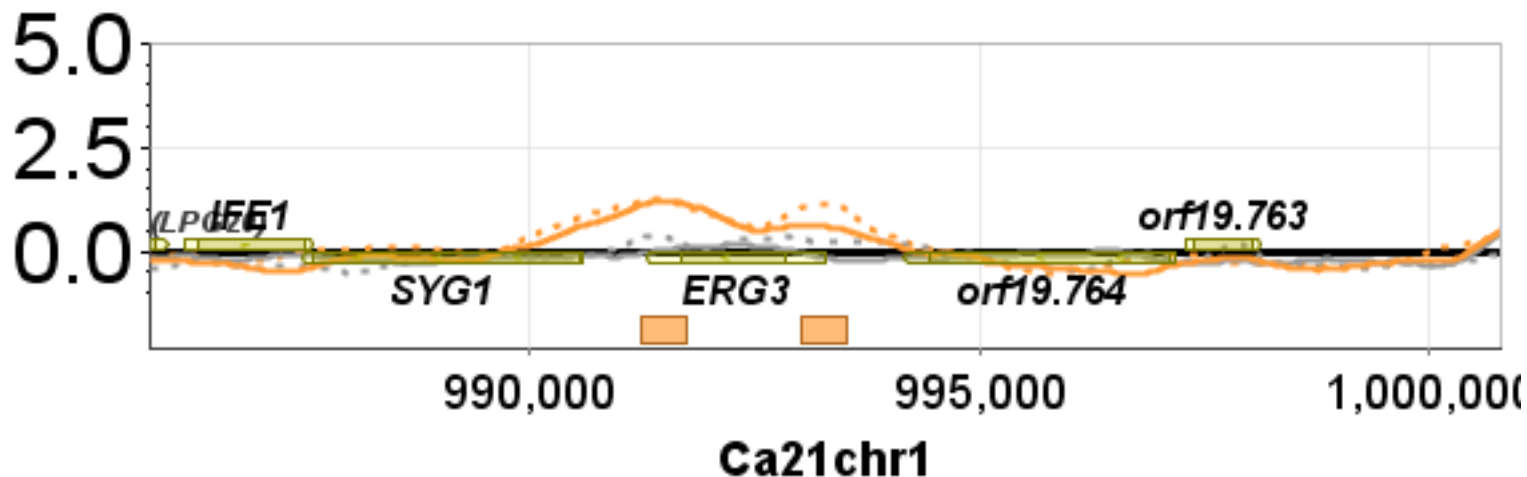

[1.148] Ca21chr2:308974-323973 [+] [ntar\_313, orf19.1486, orf19.1485, orf19.1484, orf19.1483]

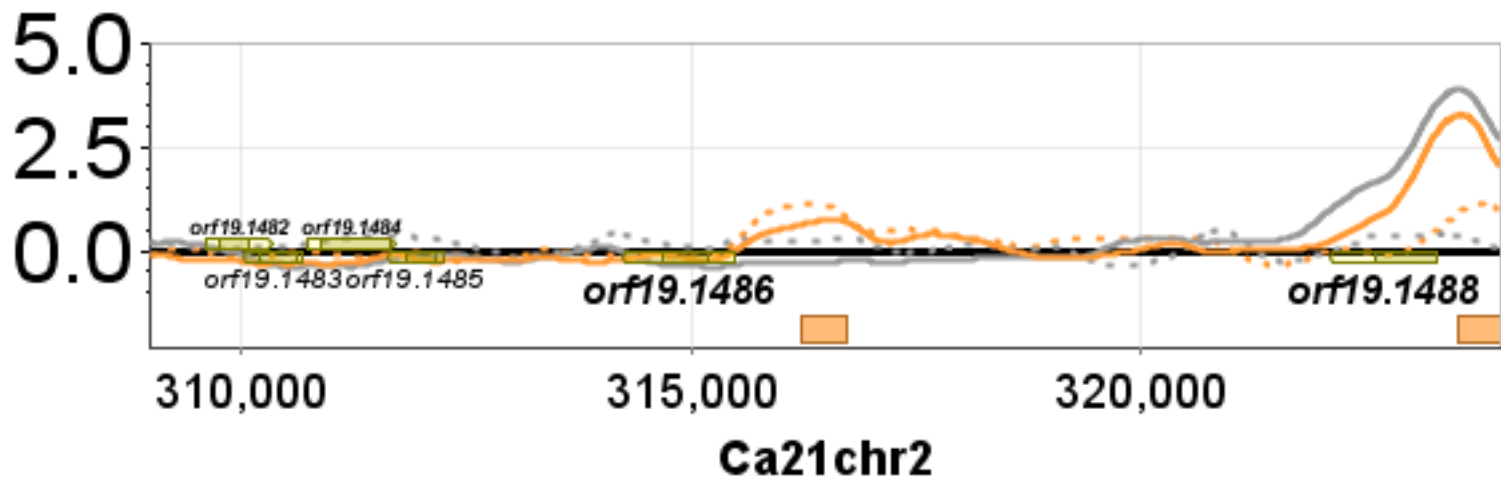

[1.146] Ca21chr1:2091735-2106734 [+] [RAM2, ntar\_197, orf19.4816, orf19.4818, orf19.4819]

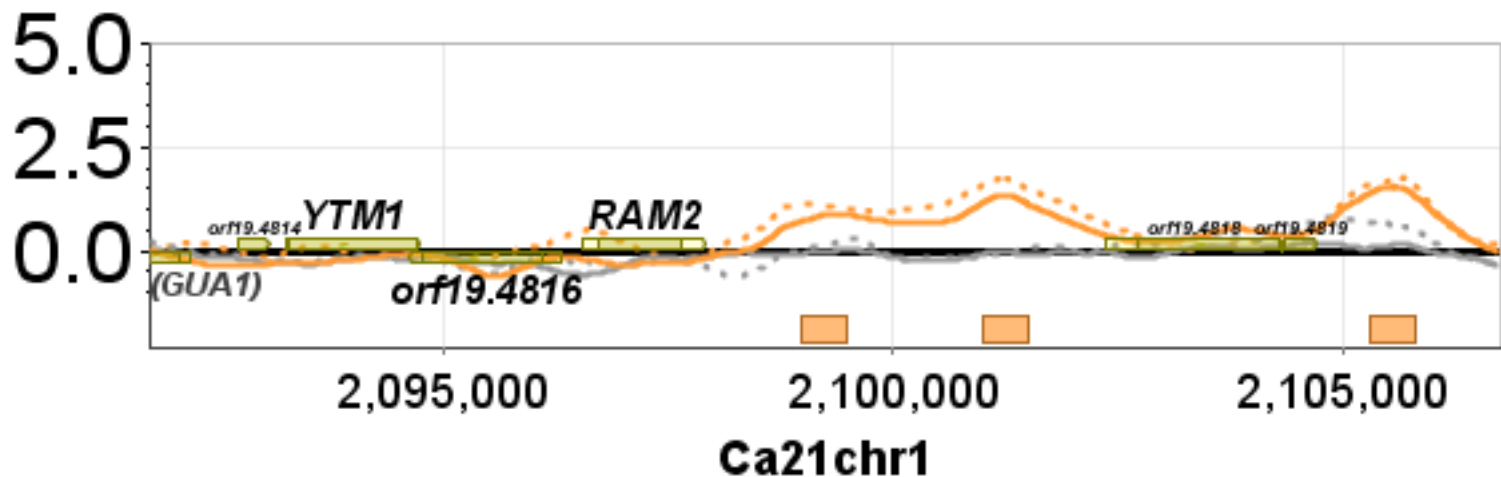



[1.142] Ca21chr4:464334-479333 [+] [PGA59, ntar\_758, ntar\_757, ntar\_756, ntar\_755]

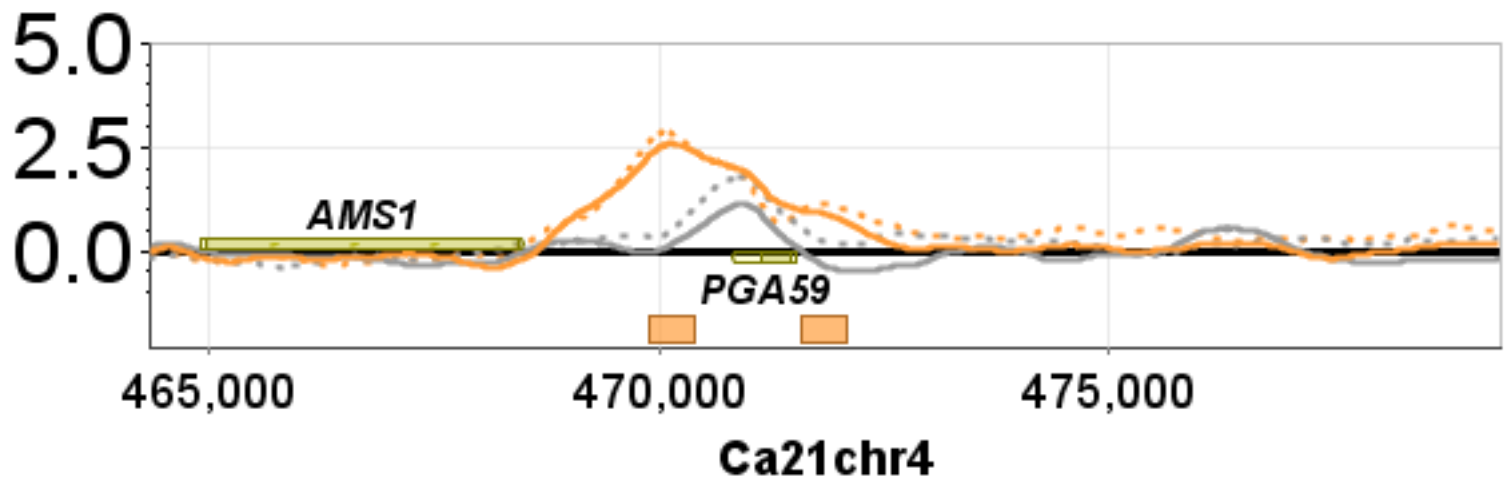

[1.142] Ca21chrR:1086017-1101016 [+] [GLN1, ntar\_1277, orf19.647.3, th(quq)1, orf19.645.1]

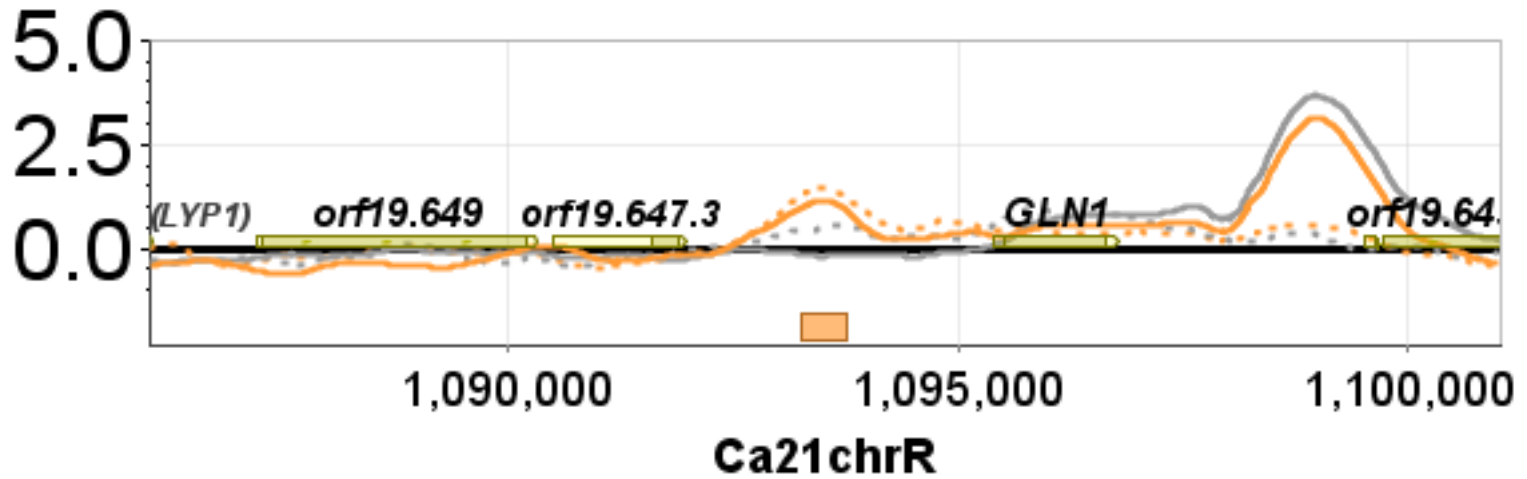

[1.141] Ca21chr2:466615-481614 [+] [orf19.1562, ECM3, POB3, ntar\_330, HOM2]

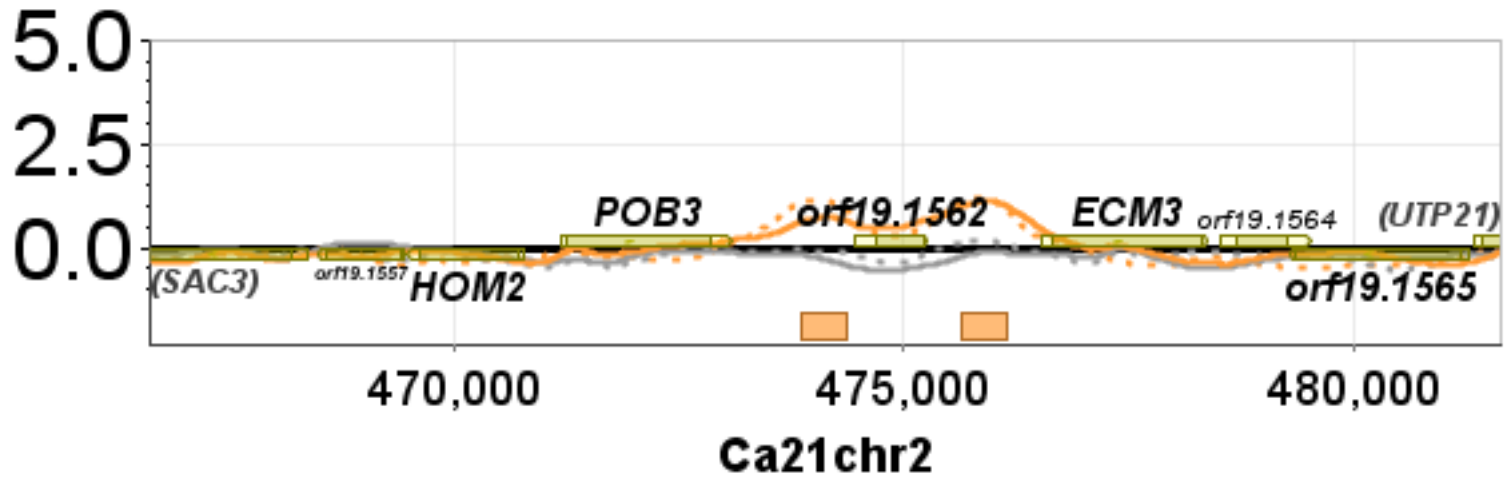

[1.141] Ca21chrR:481043-496042 [+] [orf19.3751, RAD51, SEF1, IFC3]

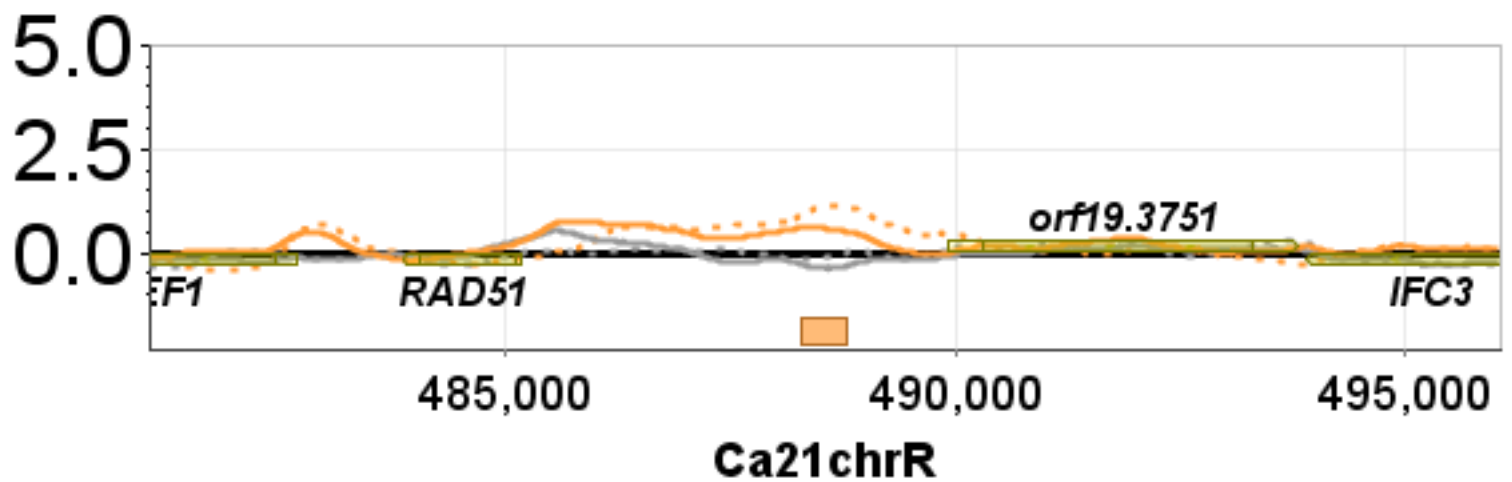

[1.138] Ca21chr3:1349575-1364574 [+] [orf19.7381, orf19.7380]

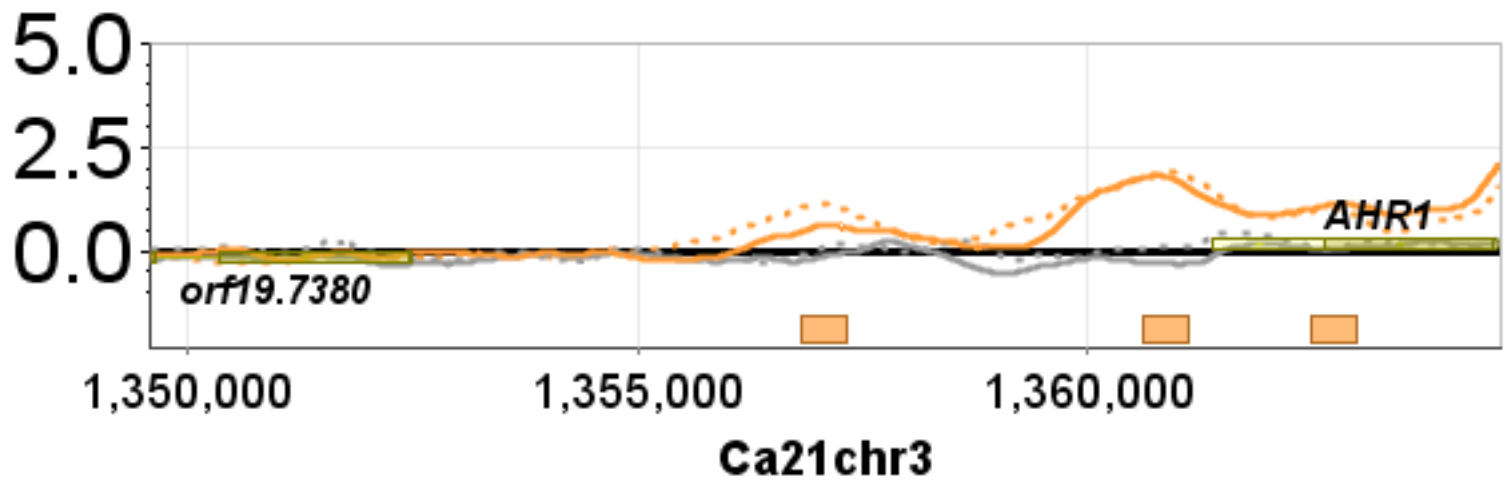

[1.136] Ca21chr1:1736183-1751182 [+] [orf19.5070, ntar\_166, ntar\_165, NRP1, ntar\_164]

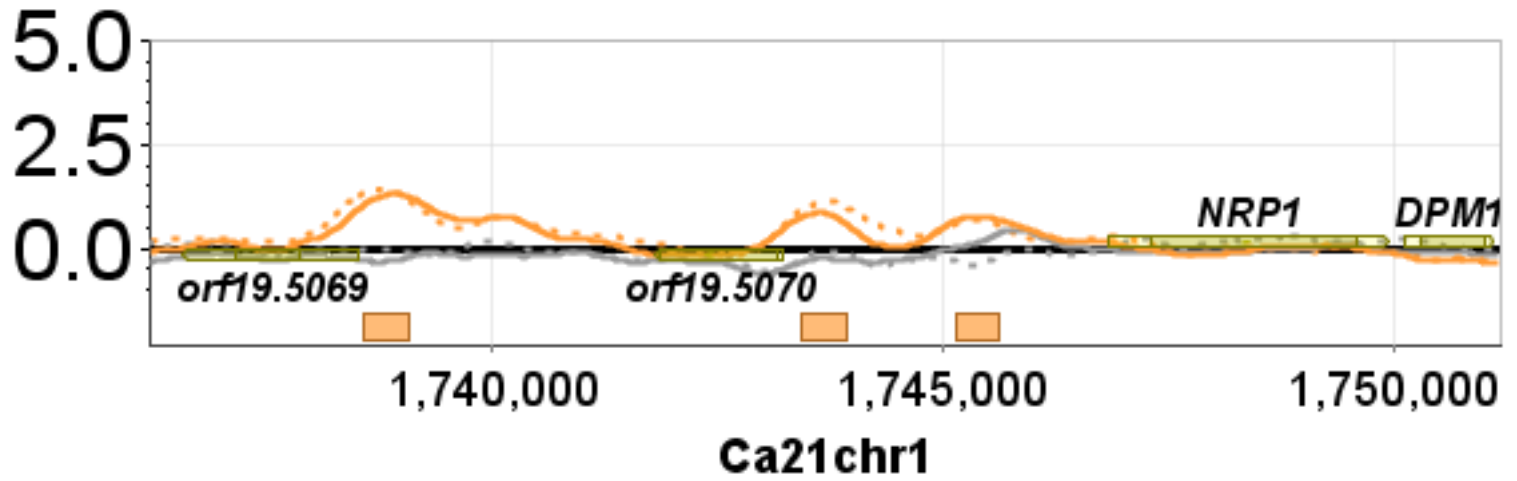

[1.133] Ca21chr7:435284-450283 [+] [ntar\_1101, ntar\_1103, ntar\_1102, HSP90, RAD14]

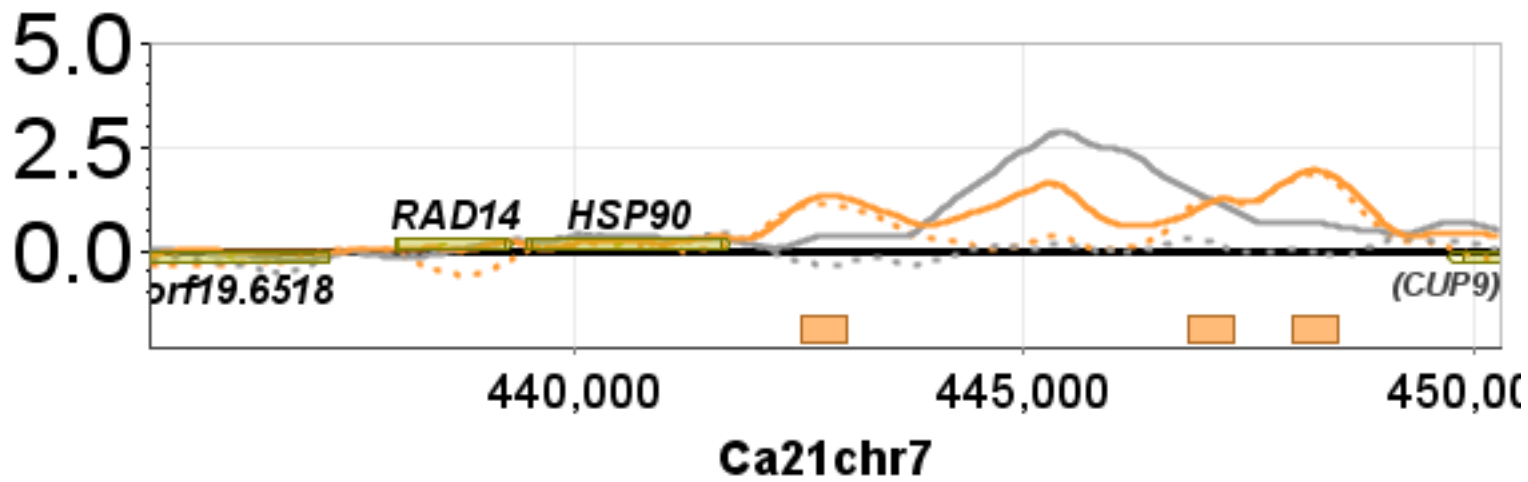

[1.129] Ca21chr6:294495-309494 [+] [orf19.3434, OYE23, orf19.3435, orf19.3432, orf19.3436]

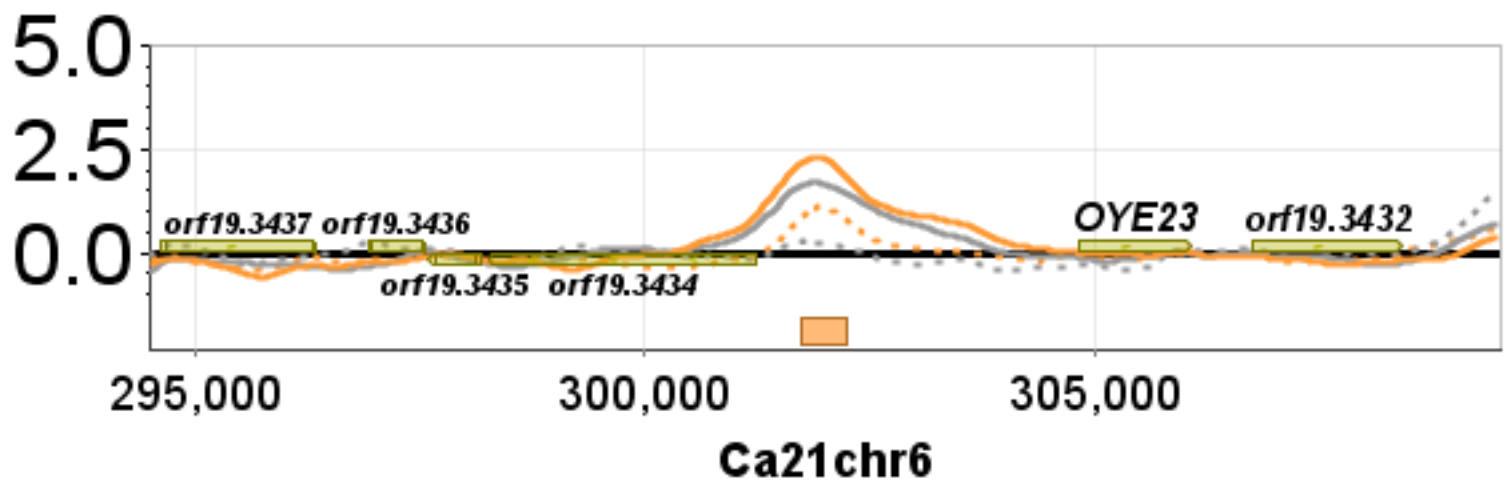

[1.126] Ca21chr5:408254-423253 [+] [ntar\_881, HAL9, TAC1, ST11, ZNC1]

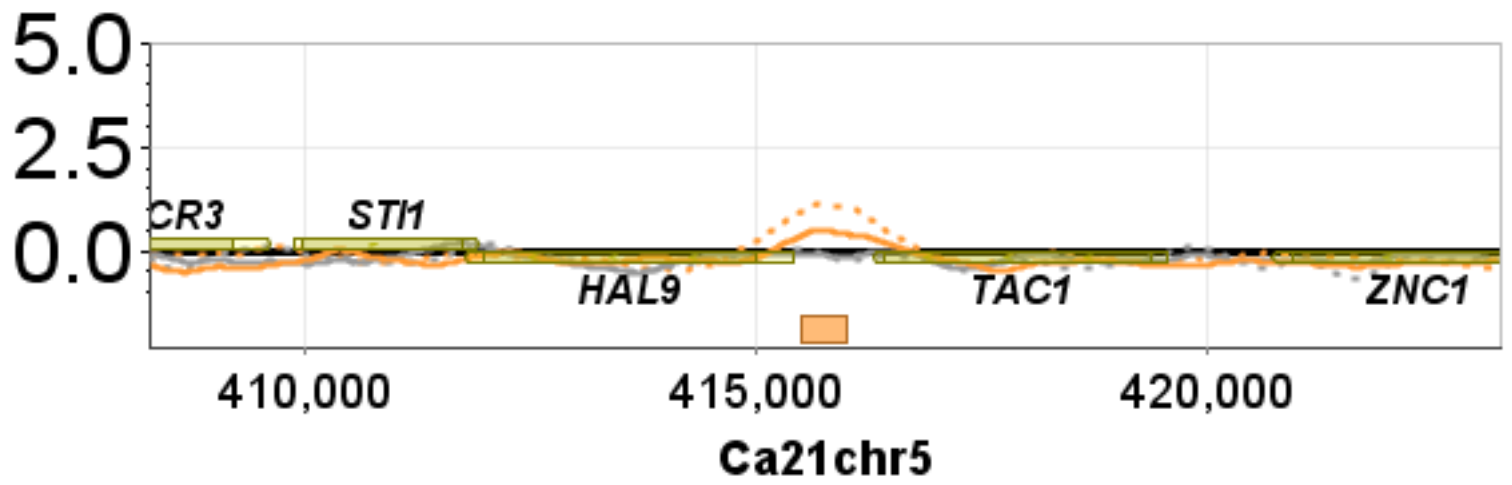

[1.125] Ca21chr7:102323-117322 [+] [ntar\_1413, orf19.7055, orf19.7056, orf19.7054, GAC1]

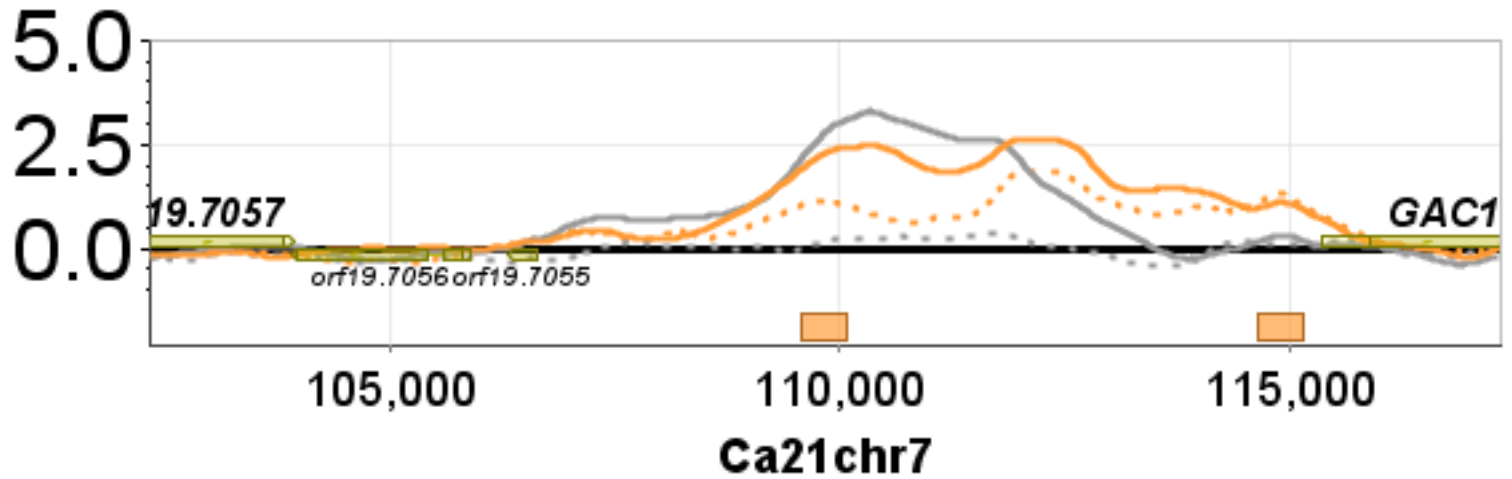

[1.123] Ca21chr4:689465-704464 [+] [orf19.1440, ntar\_779, ntar\_778, IPK1, orf19.1440.1]

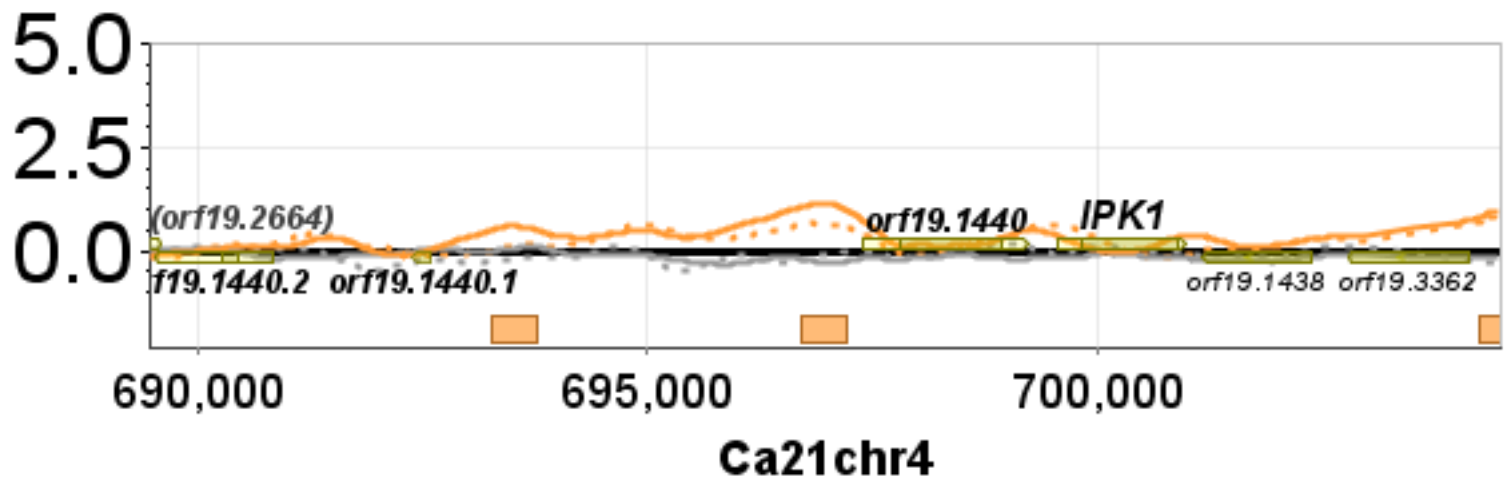

[1.122] Ca21chr3:1502835-1517834 [+] [FUN31, orf19.7450, orf19.7449, orf19.7452, LYS9]

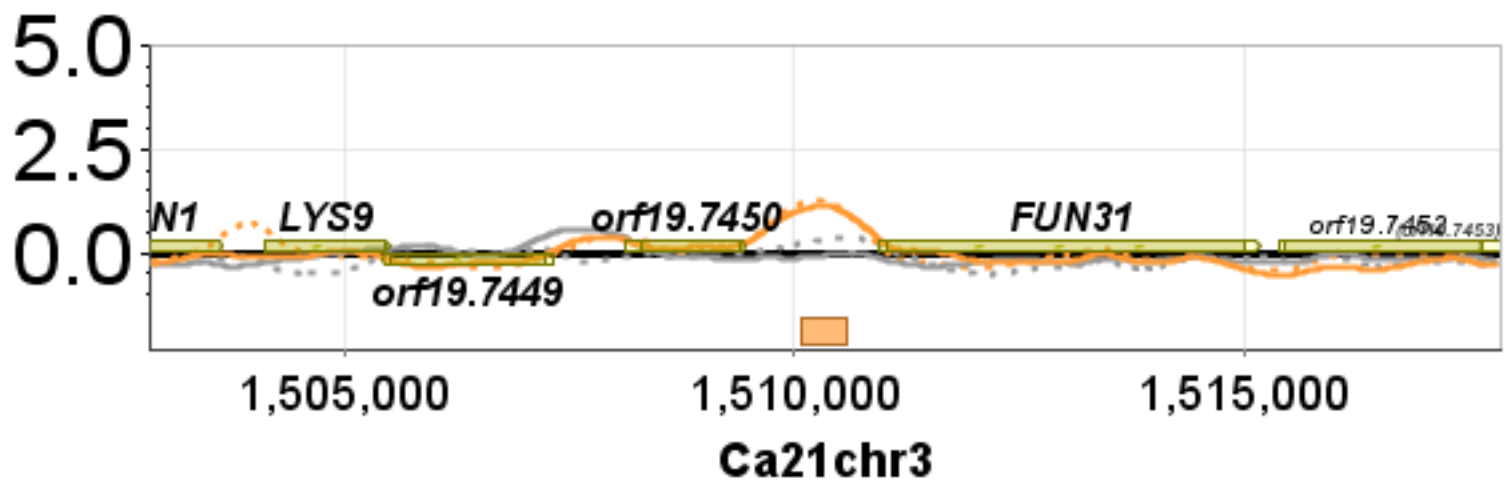

[1.112] Ca21chr3:1355247-1370246 [+] [orf19.7381, CAM1, MNN9, NOG1]

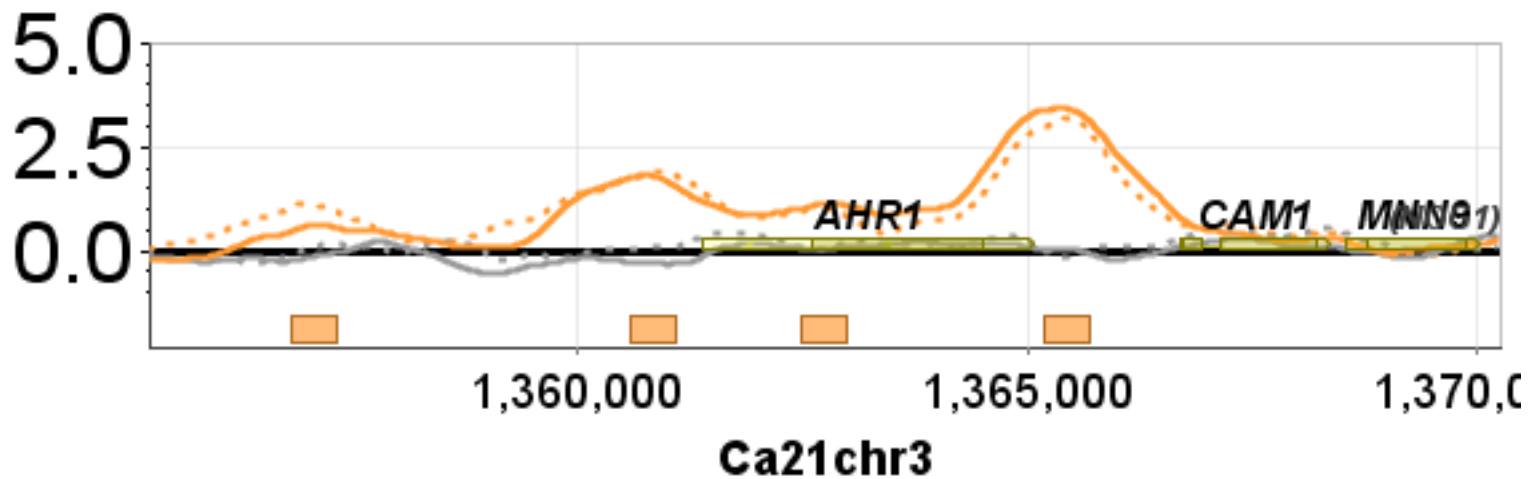

[1.115] Ca21chr2:316263-331262 [+] [tl(caa)1, orf19.1488, ntar\_314, MSB2, ntar\_313]

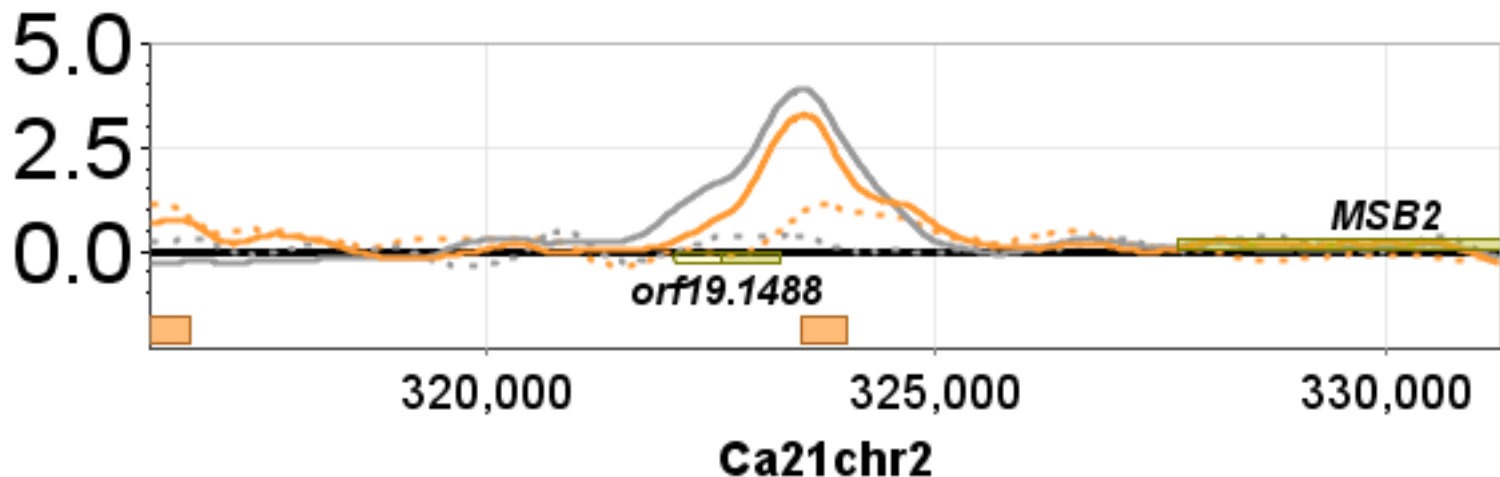

[1.111] Ca21chr3:1241474-1256473 [+] [GAP2, BAT22, orf19.6995, orf19.6992, orf19.6996]

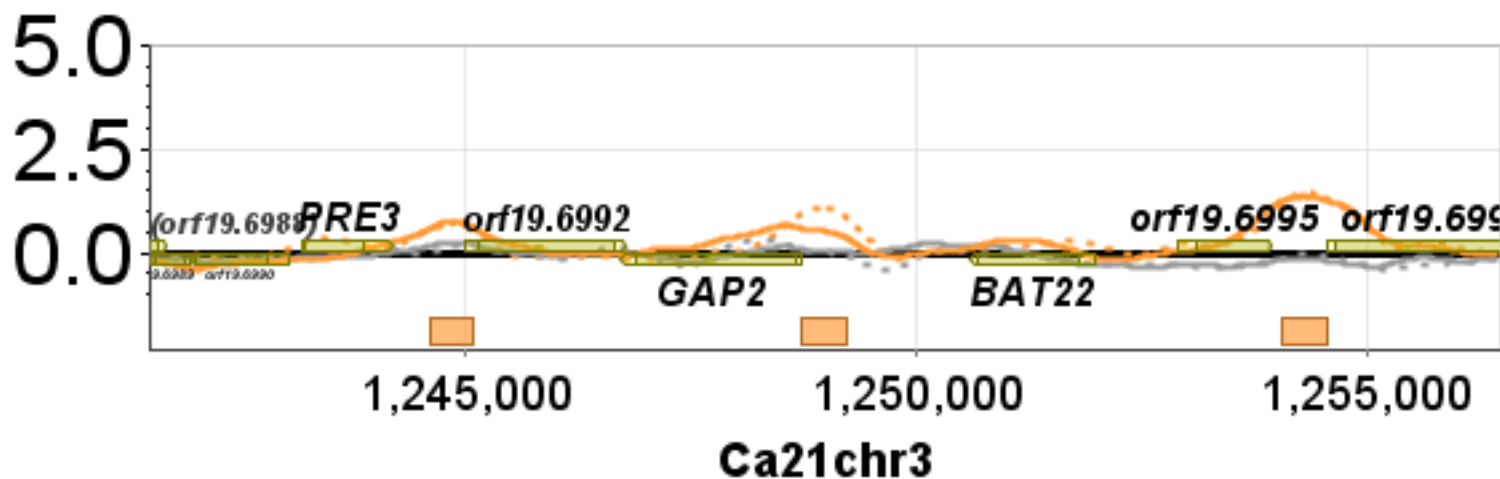

[1.109] Ca21chr2:1645603-1660602 [+] [PHM7, orf19.2169, orf19.2168.3, ntar\_438, orf19.2168]

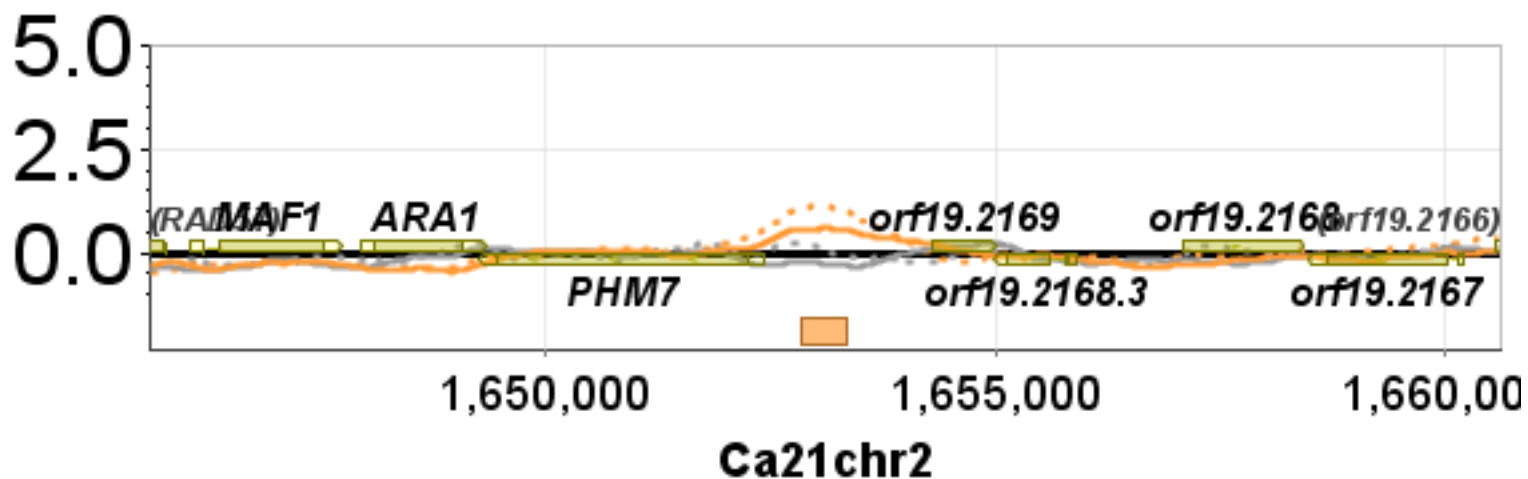

[1.108] Ca21chr1:2241562-2256561 [+] [orf19.4889, CLA4, orf19.4888, ntar\_208, ECM21]

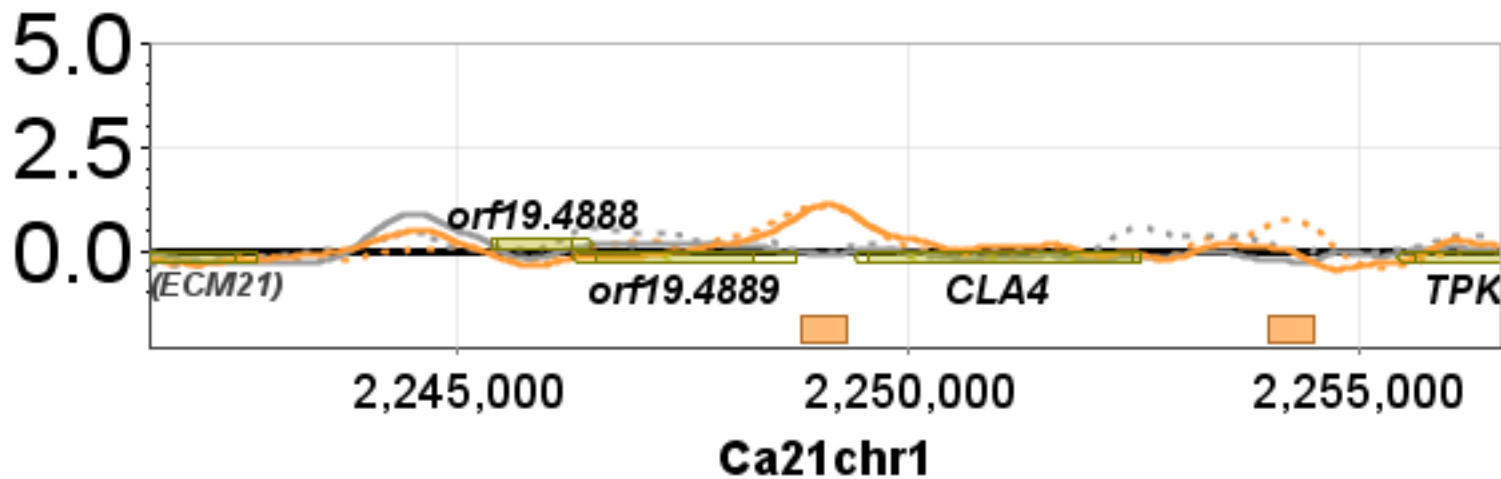

[1.107] Ca21chrR:1405871-1420870 [+] [ntar\_1311, ntar\_1310, ntar\_1312, ntar\_1314, RGS2]

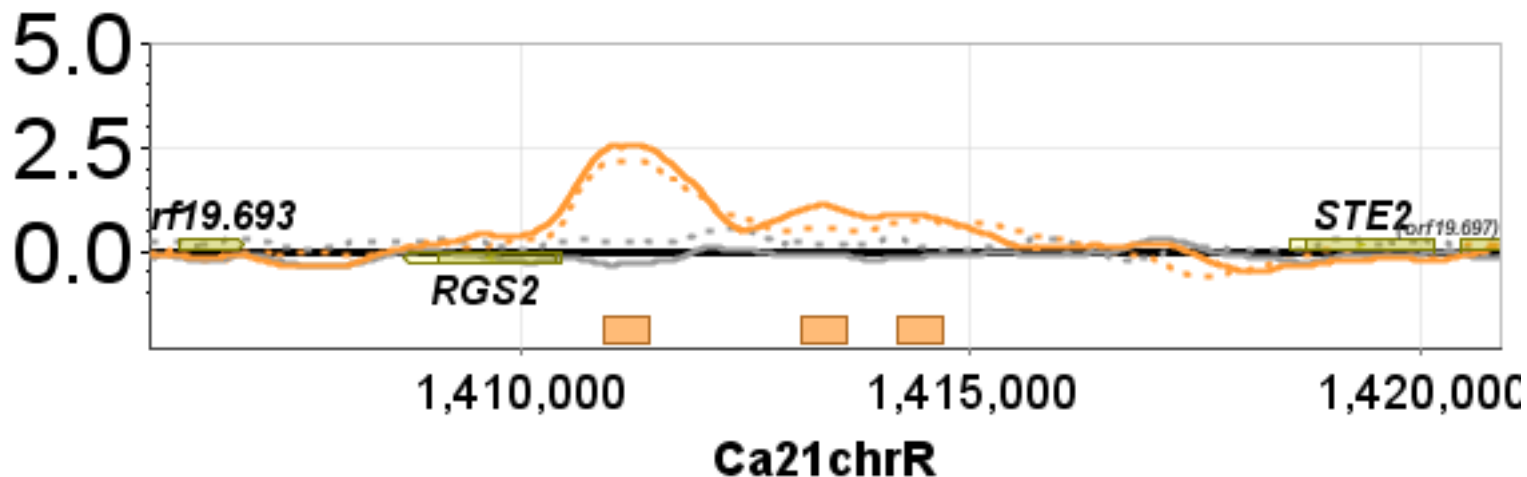

[1.107] Ca21chrR:2114231-2129230 [+] [orf19.7566, GNP3, orf19.7567, DPB2, orf19.7568]

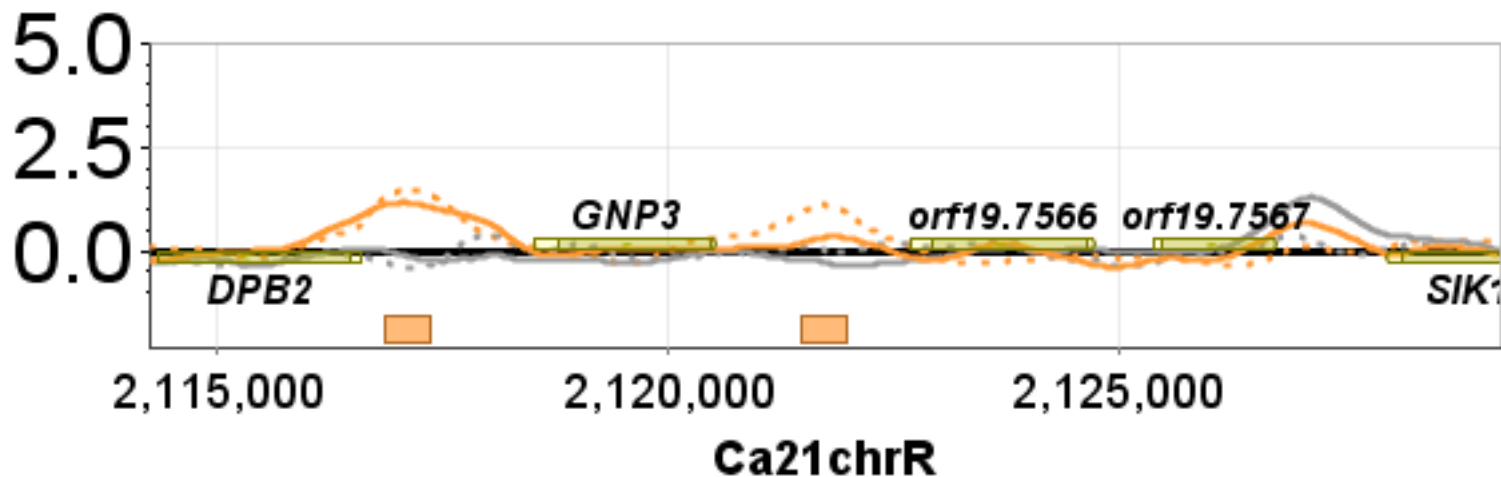

[1.105] Ca21chr5:845199-860198 [+] [orf19.1106, orf19.1105.3, PGA56, ntar\_930, orf19.1107]

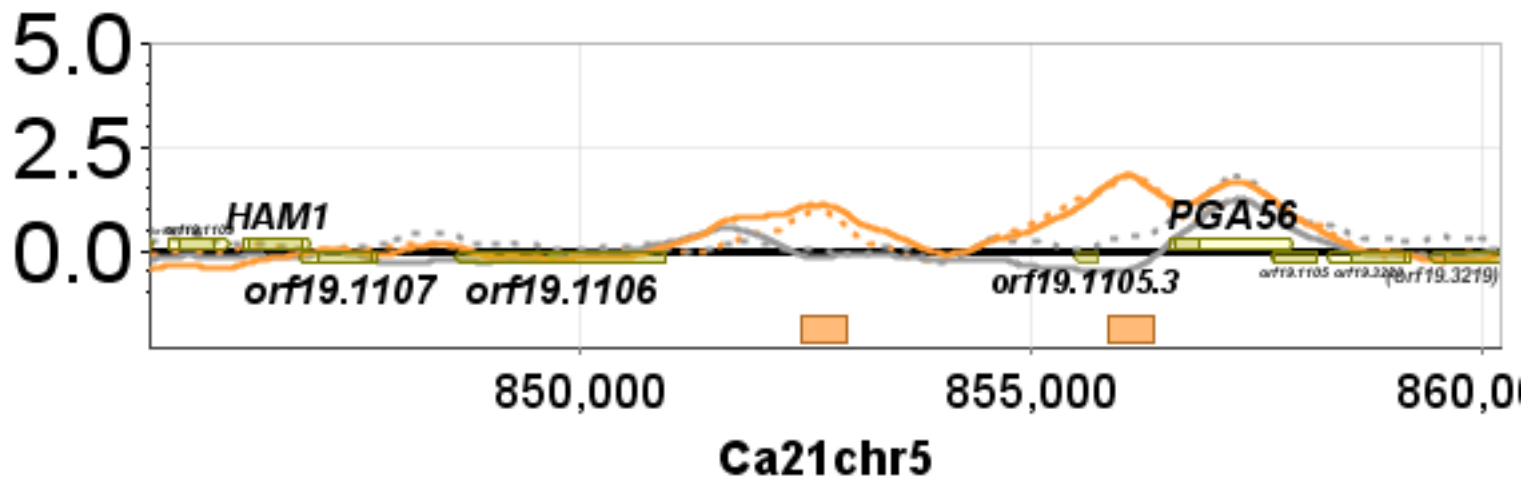

[1.105] Ca21chrR:1990450-2005449 [+] [ntar\_1377, orf19.7337, ntar\_1378, ntar\_1379, orf19.7336]

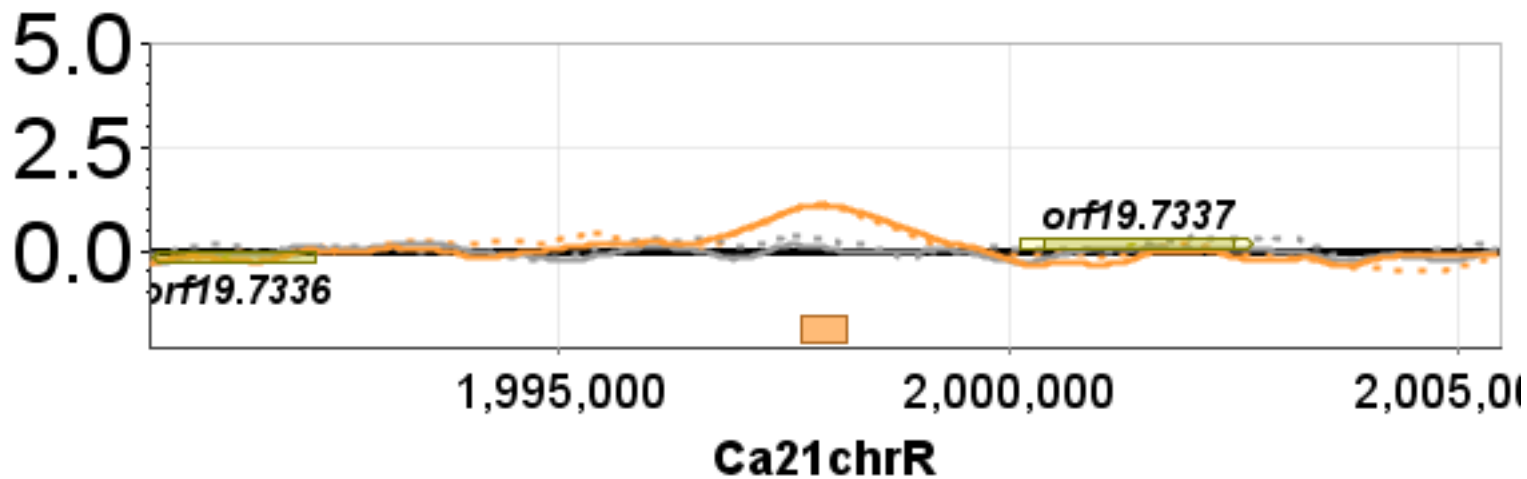

[1.104] Ca21chrR:144263-159262 [+] [orf19.7468, ARG1, ntar\_1166, ACC1, IFF4]

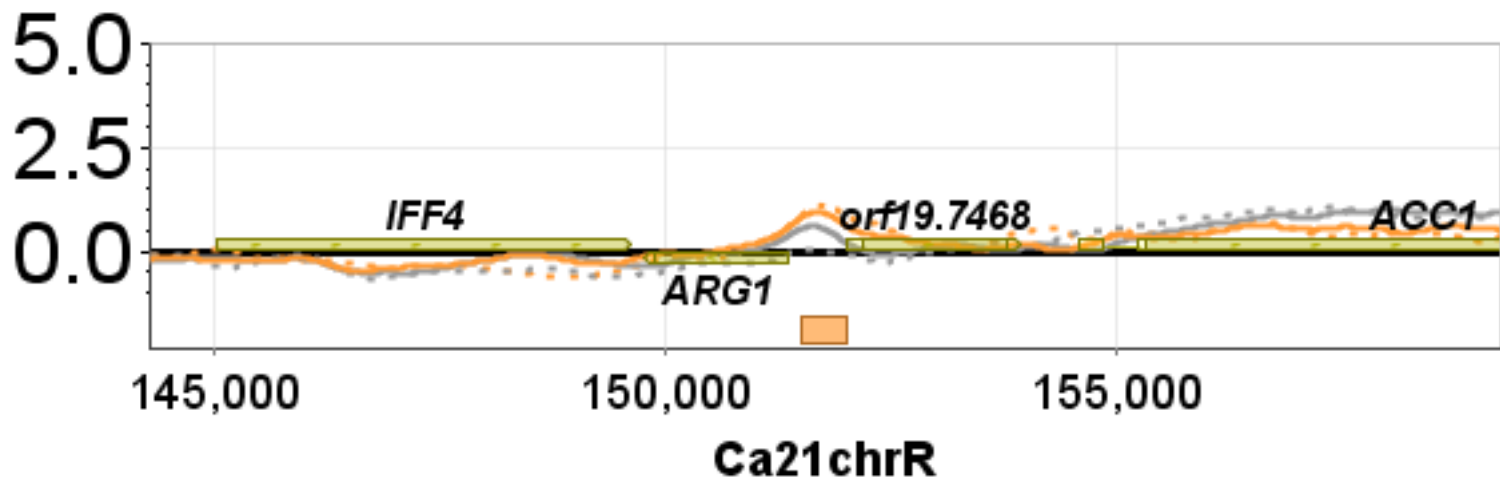

[1.102] Ca21chr5:925512-940511 [+] [orf19.3902, ntar\_944, ntar\_943, ntar\_942, orf19.3901]

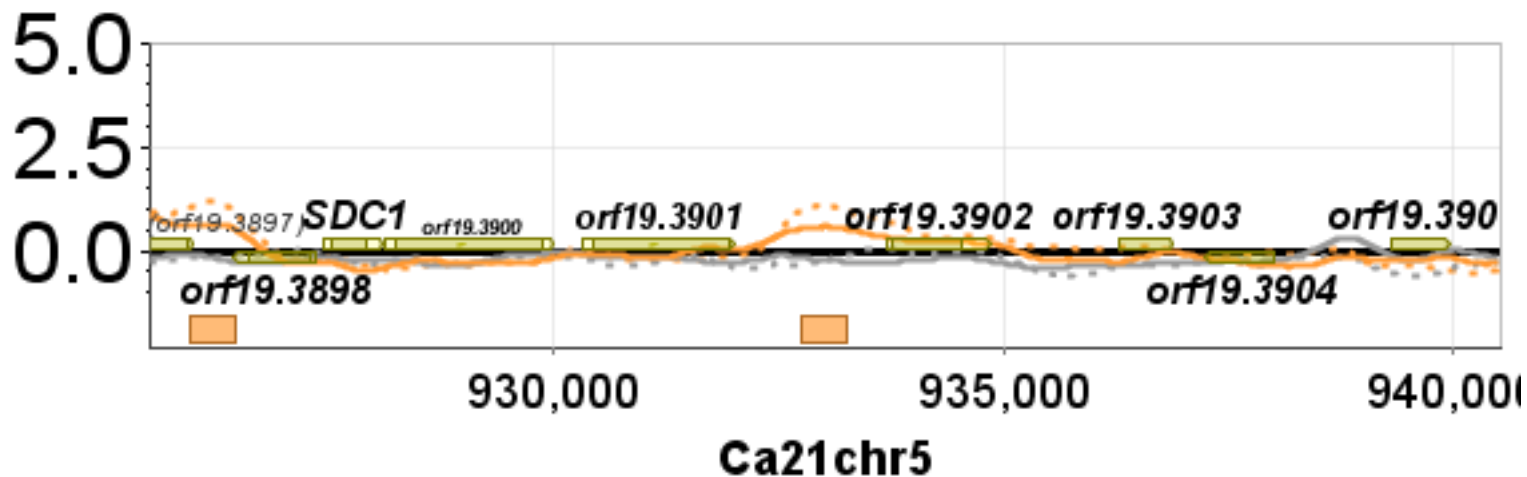

[1.1] Ca21chr5:1050080-1065079 [+] [orf19.3970, orf19.3971, ntar\_953, orf19.3972, orf19.3973]

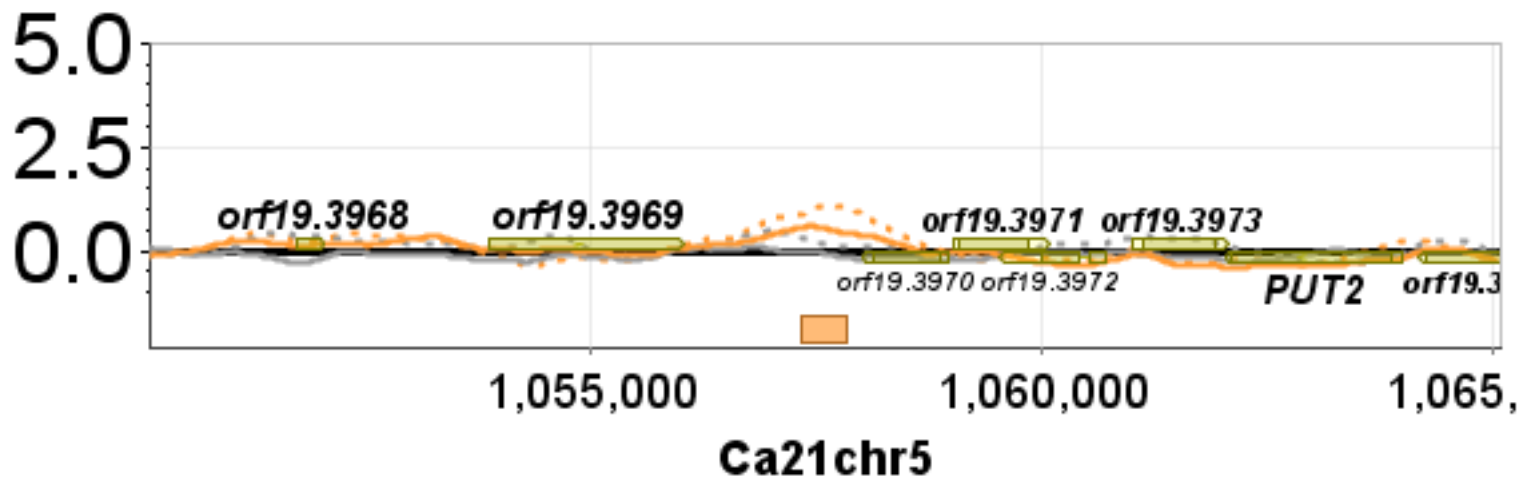

[1.099] Ca21chr6:149268-164267 [+] [SUN41, CAN3, orf19.3643]

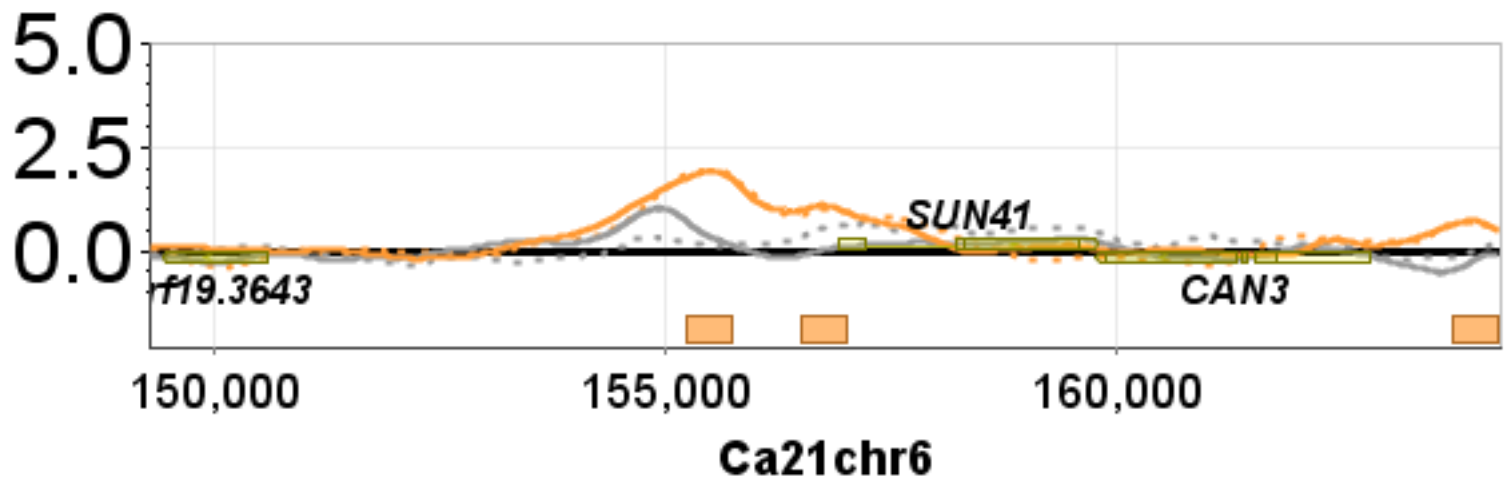

[1.097] Ca21chr1:2623513-2638512 [+] [Intar\_247, orf19.5264, KIP4, SER33, orf19.5262]

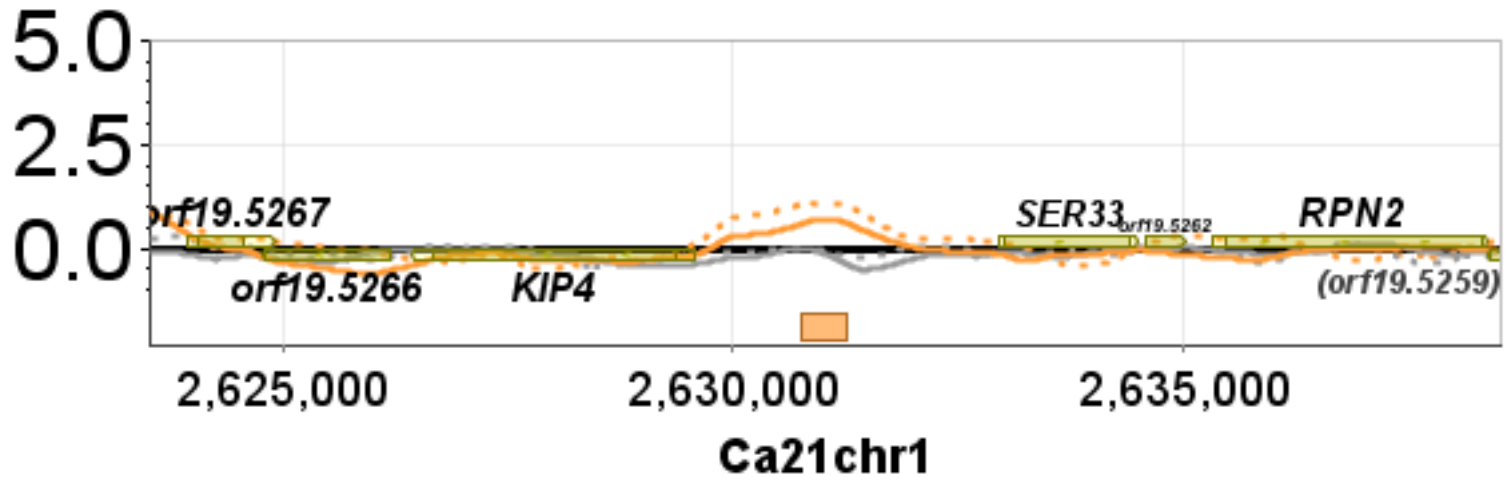

[1.097] Ca21chrR:2206586-2221585 [+] [HCR1, CTM1, orf19.7614, orf19.7615, orf19.7617]

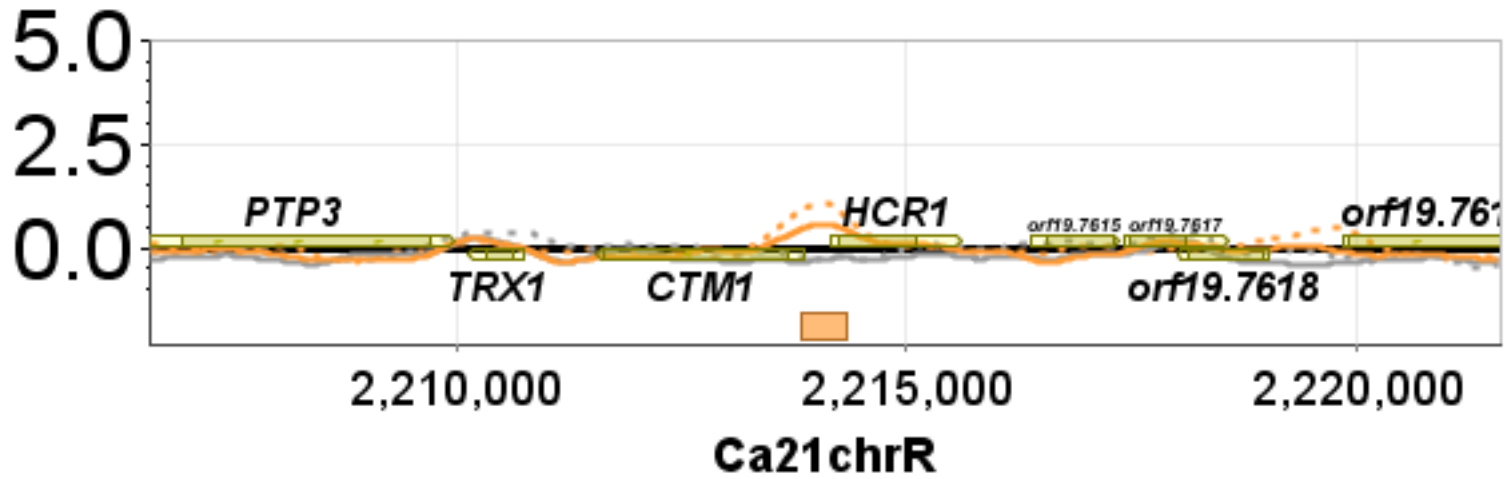

[1.095] Ca21chr1:223082-238081 [+] [orf19.3302, ntar\_18, ntar\_19, ntar\_20, orf19.3303]

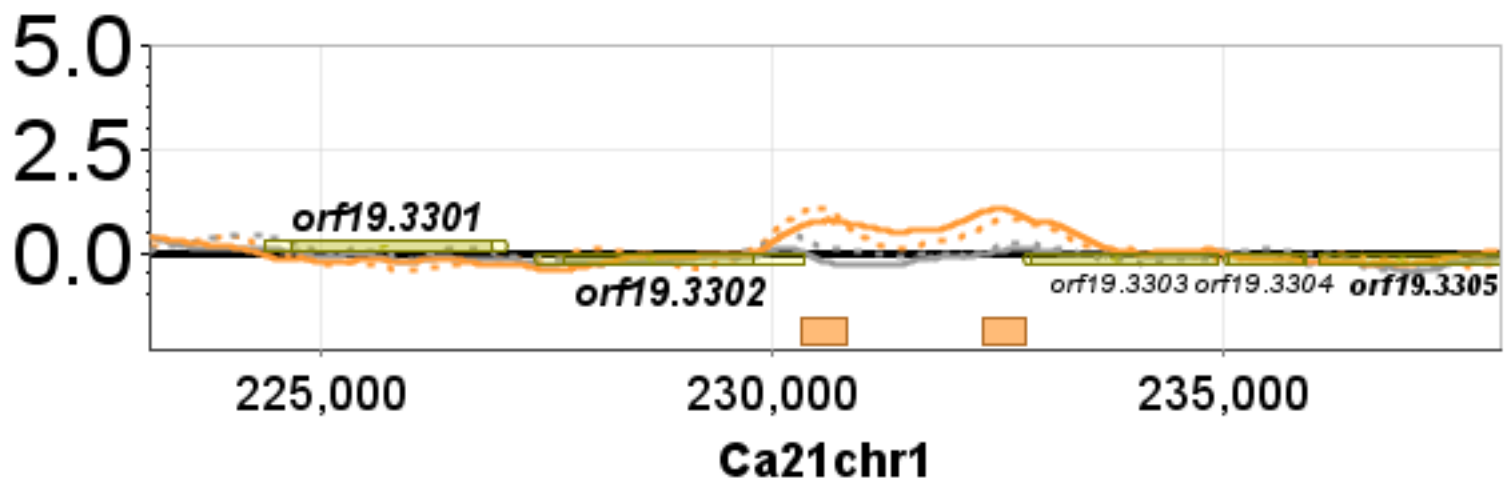

[1.09] Ca21chr1:1518635-1533634 [+] [GAP4, orf19.4455, TAF145, RIA1]

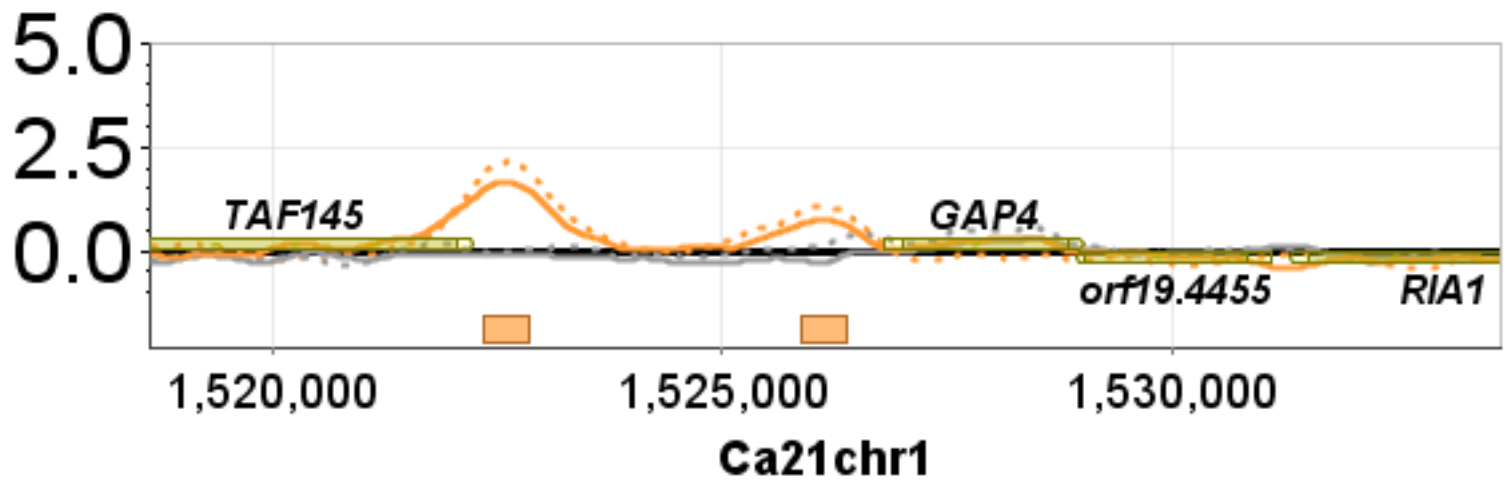

[1.088] Ca21chr2:155829-170828 [+] [orf19.2024, ntar\_296, HGT7, orf19.2025, orf19.2026]

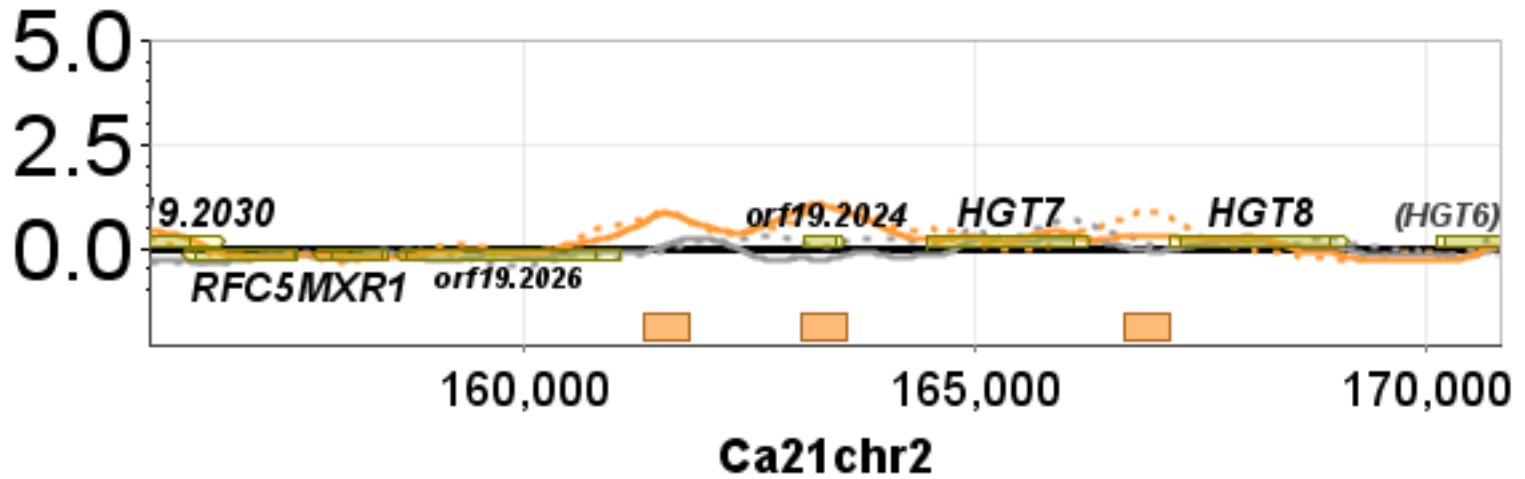

[1.086] Ca21chr4:1517389-1532388 [+] [CZF1, CCT6, orf19.3125, orf19.3128, orf19.3124]

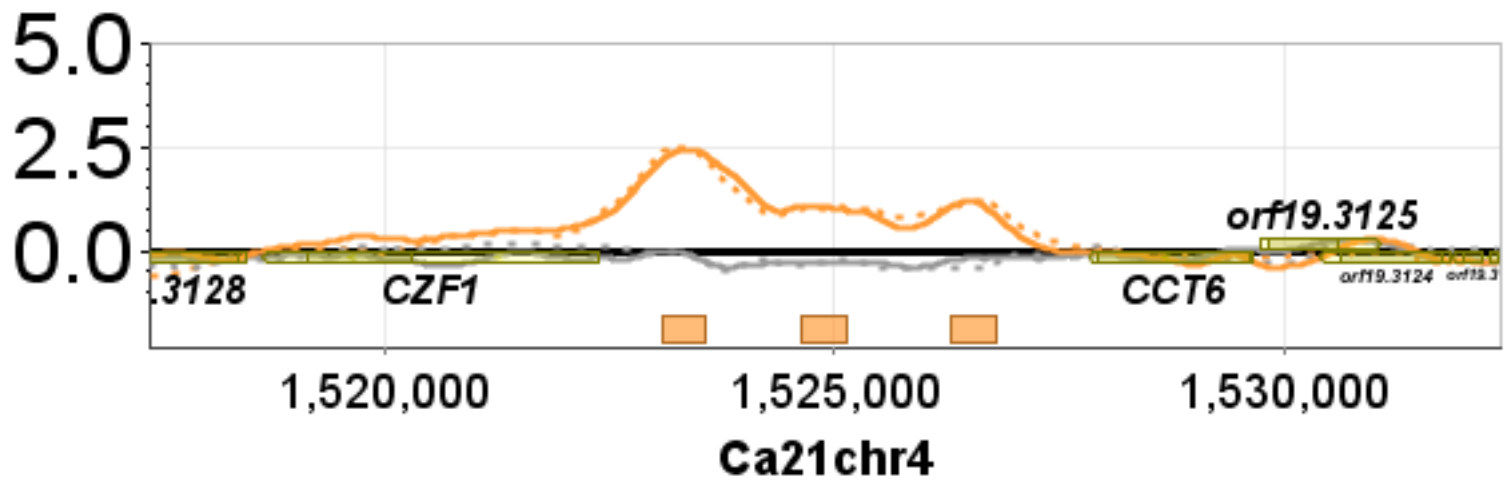

[1.083] Ca21chr2:1373570-1388569 [+] [ntar\_423, LSP1, orf19.3148, ntar\_421, ntar\_422]

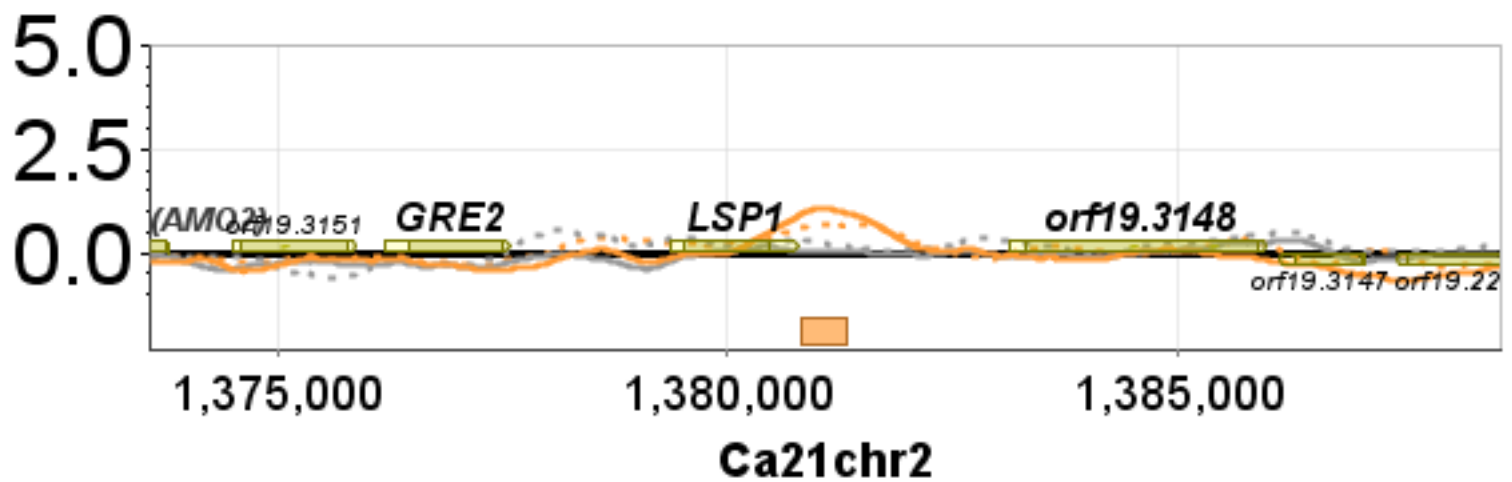



[1.081] Ca21chr1:2046696-2061695 [+] [orf19.4793, ntar\_195, orf19.4792, orf19.4791, orf19.4795]

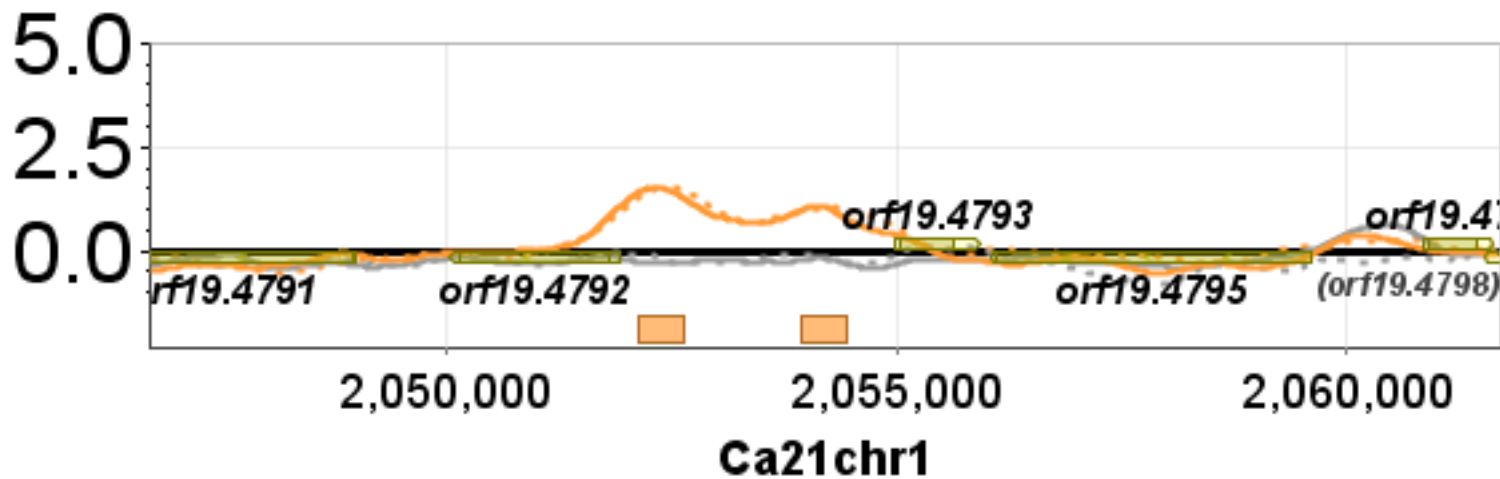

[1.08] Ca21chr2:1833055-1848054 [+] [orf19.204, STB3, ntar\_465, ntar\_466, CDC47]

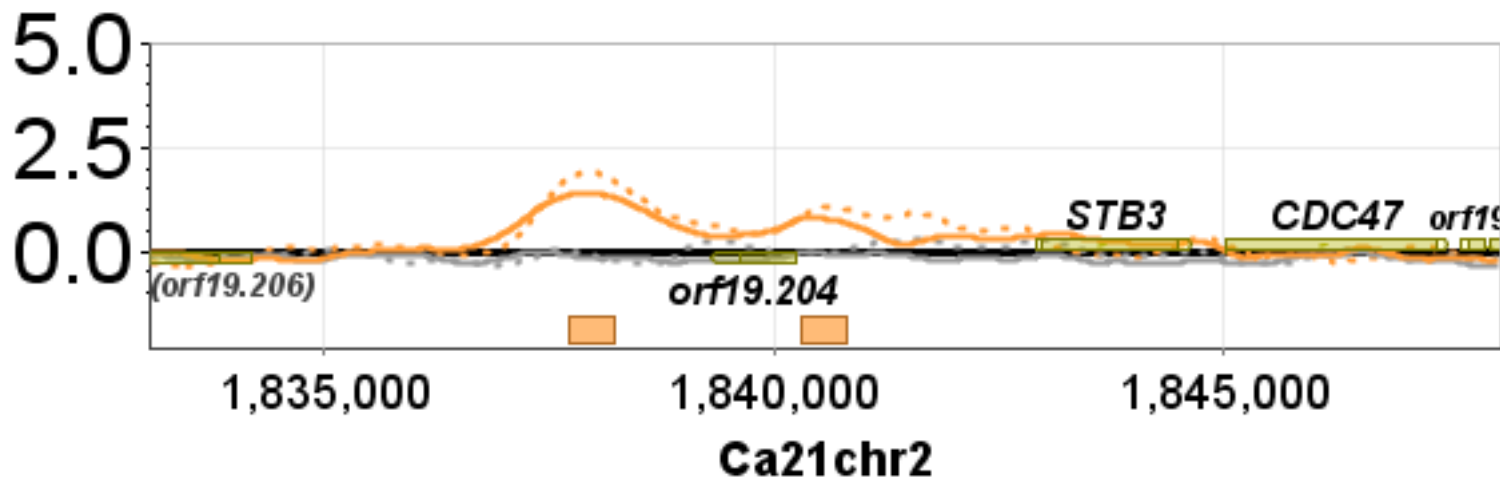

[1.08] Ca21chr4:208146-223145 [+] [HGT17, RAT1, MLP1, RPL40B, ntar\_727]

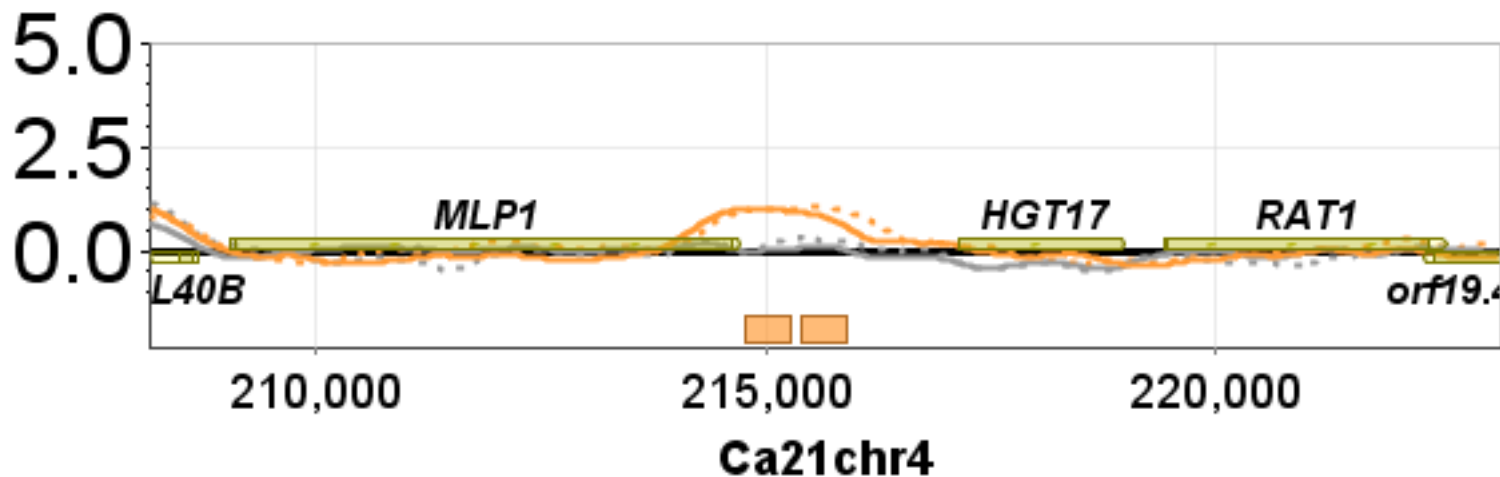

[1.078] Ca21chr3:1215278-1230277 [+] [ntar\_633, orf19.6984, orf19.6983, TEA1, ntar\_632]

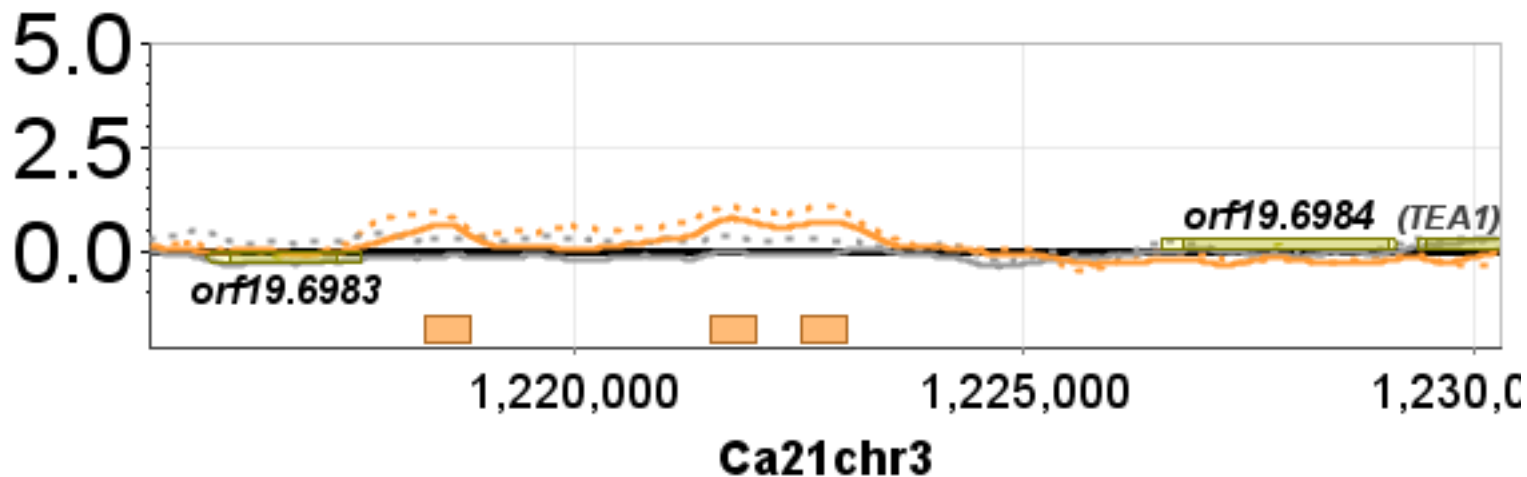

[1.074] Ca21chrR:596882-611881 [+] [ntar\_1219, ntar\_1220, RFG1, orf19.2825, ntar\_1222]

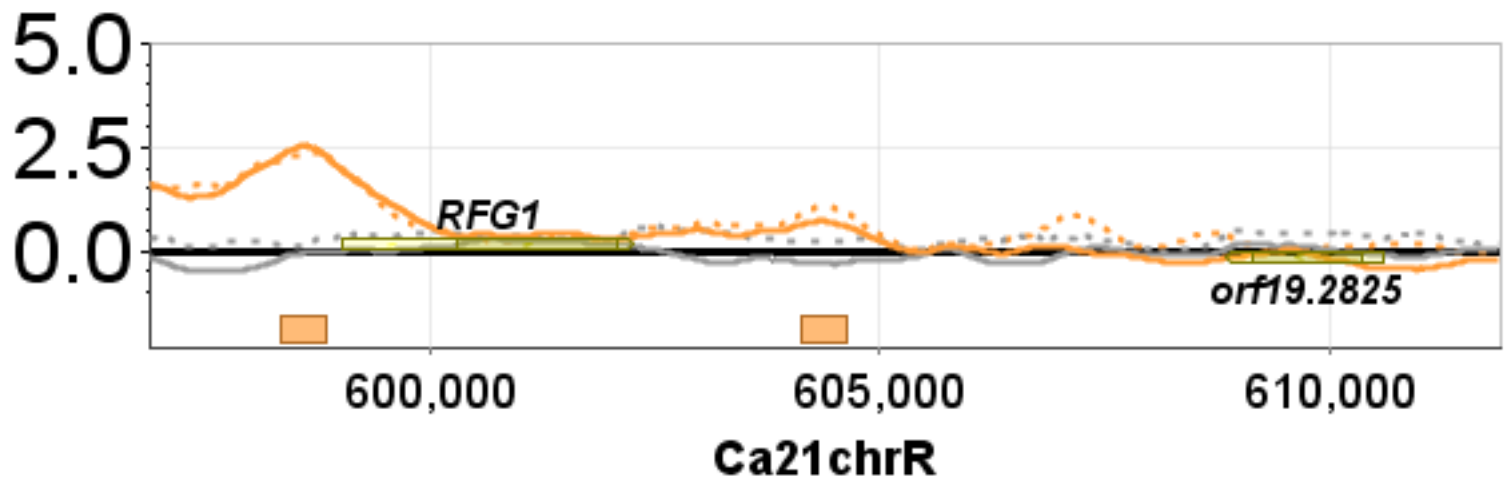

[1.074] Ca21chrR:1257713-1272712 [+] [ntar\_1292, ntar\_1291, SFL1]

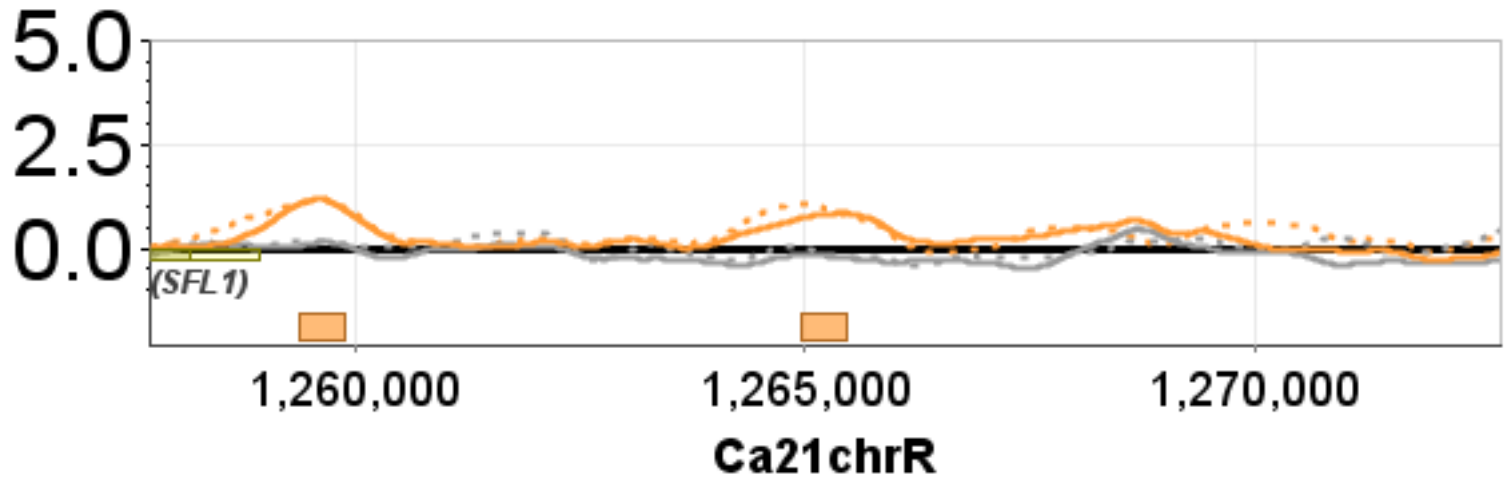

[1.073] Ca21chr1:566710-581709 [+] [orf19.2962, orf19.2963, orf19.2964, orf19.2965, orf19.2961]

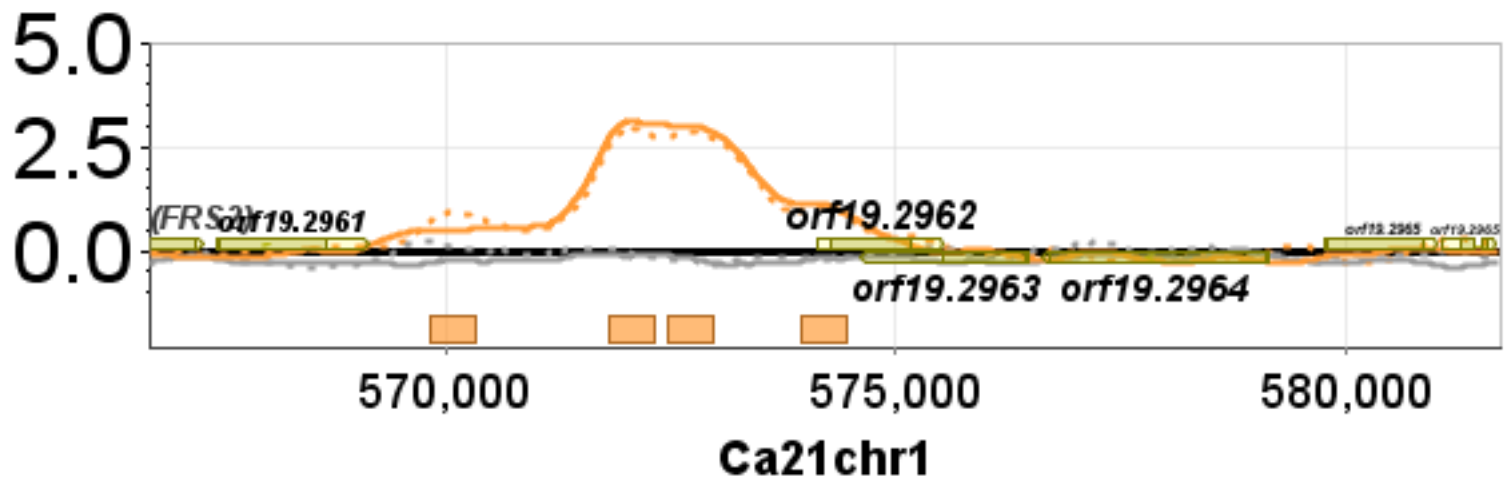

[1.07] Ca21chr1:231461-246460 [+] [ntar\_21, orf19.3305, orf19.3306, orf19.3304, orf19.3307]

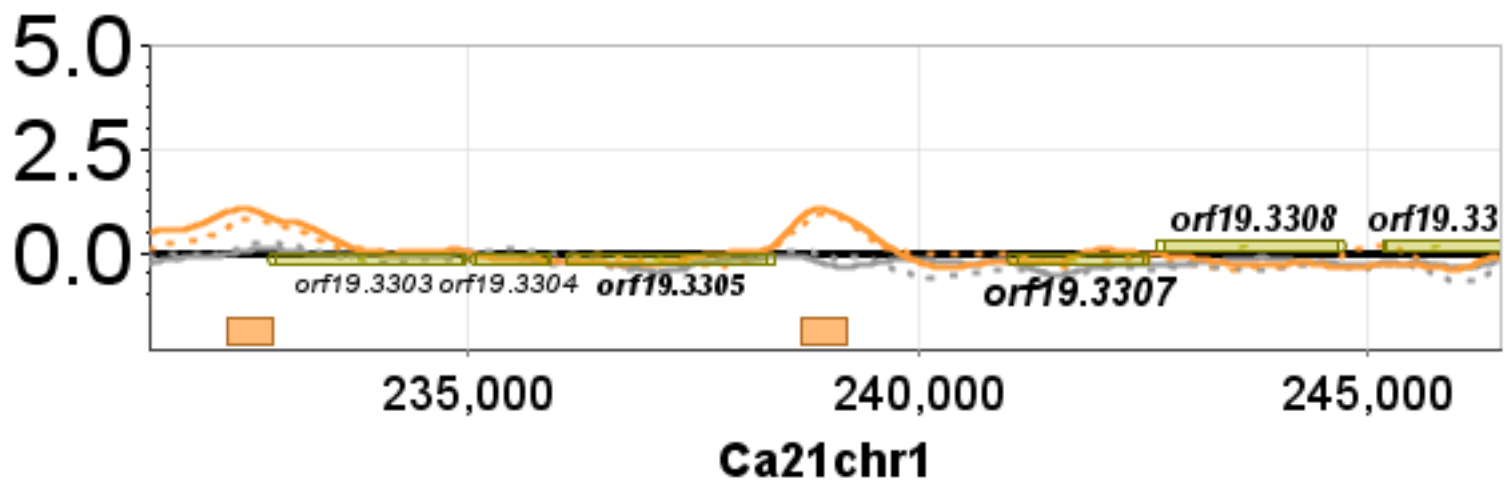

[1.067] Ca21chr2:1927028-1942027 [+] [orf19.1604, ntar\_481, PMS1, orf19.1406, ntar\_482]

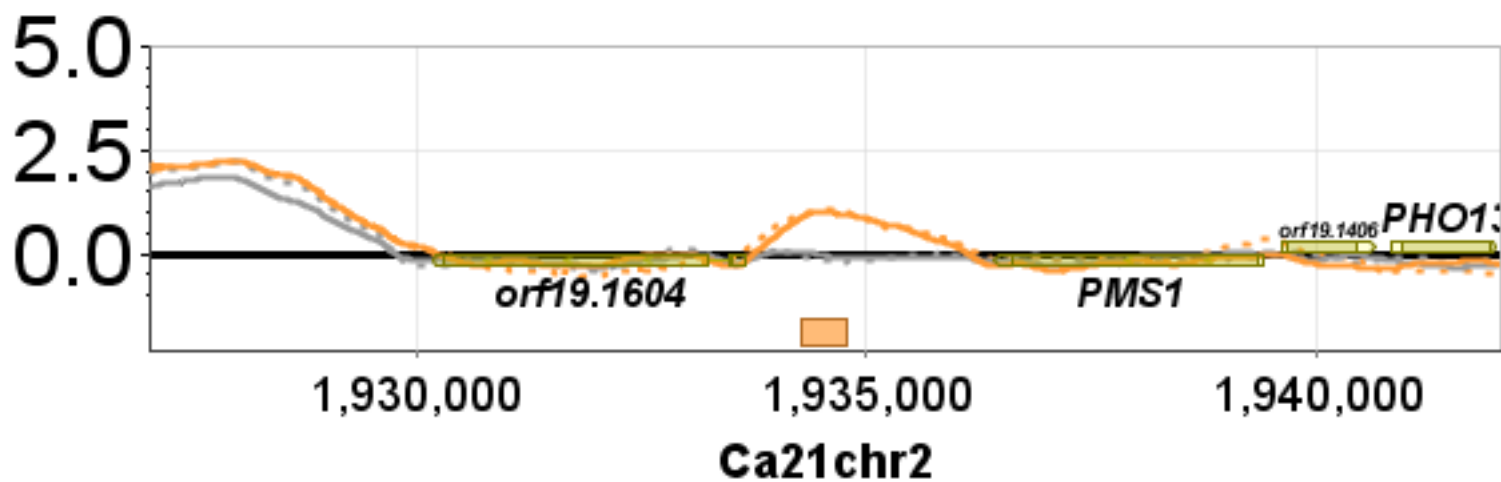

[1.06] Ca21chr2:365869-380868 [+] [ROD1, ntar\_319, orf19.1510, ntar\_318, orf19.1508]

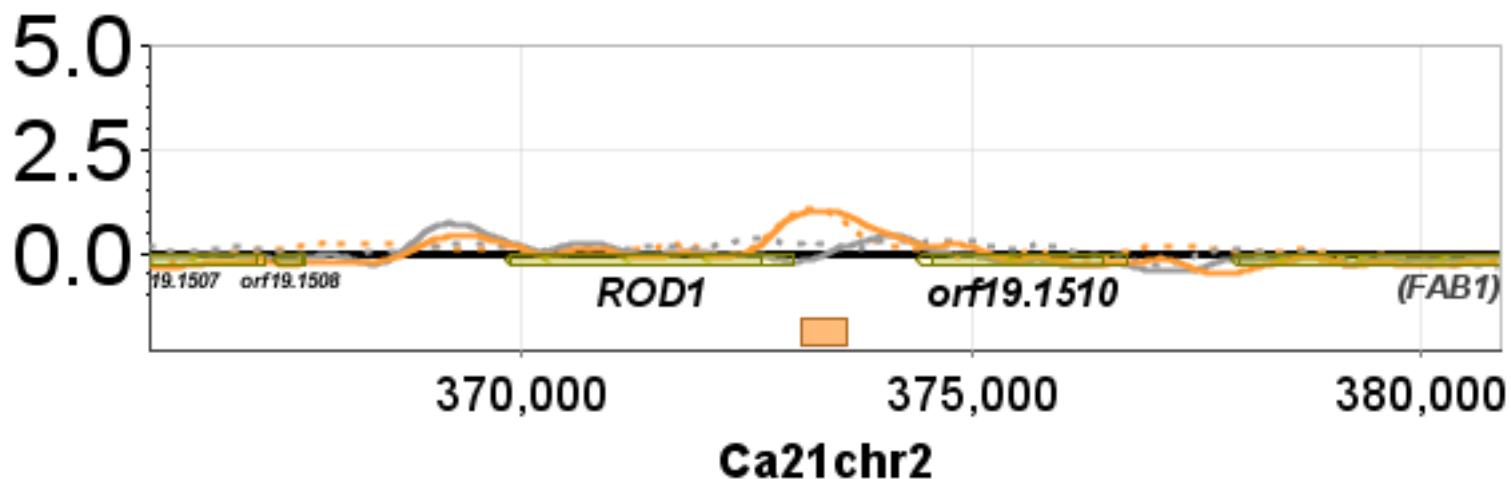

[1.057] Ca21chr2:1872306-1887305 [+] [MIT1, orf19.4078, MET10, SLP2, orf19.4080]

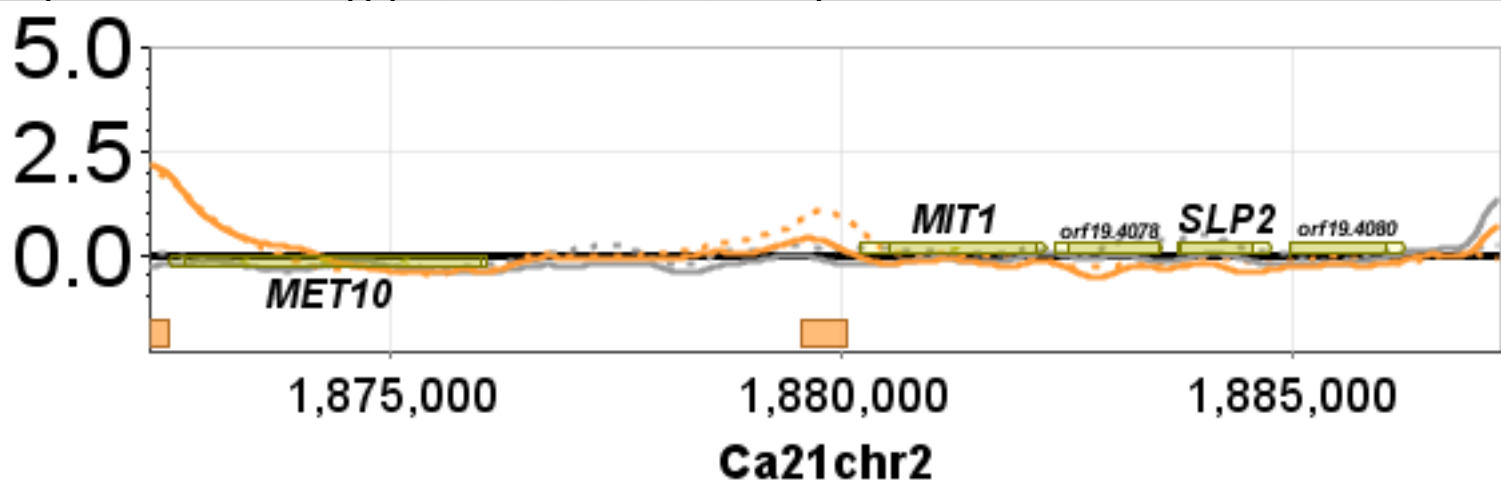

[1.057] Ca21chr5:487765-502764 [+] [orf19.4230, orf19.4229, PTH2, ntar\_890, ntar\_889]

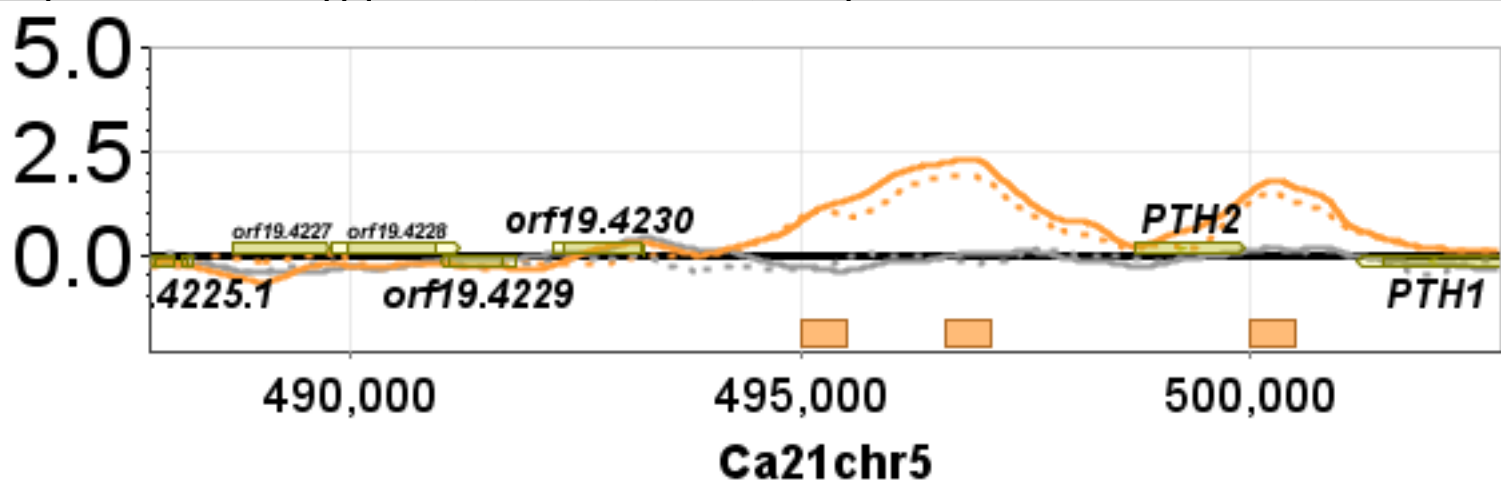

[1.052] Ca21chr3:1159951-1174950 [+] [orf19.6008, ntar\_625, orf19.6966, USO6, ntar\_624]

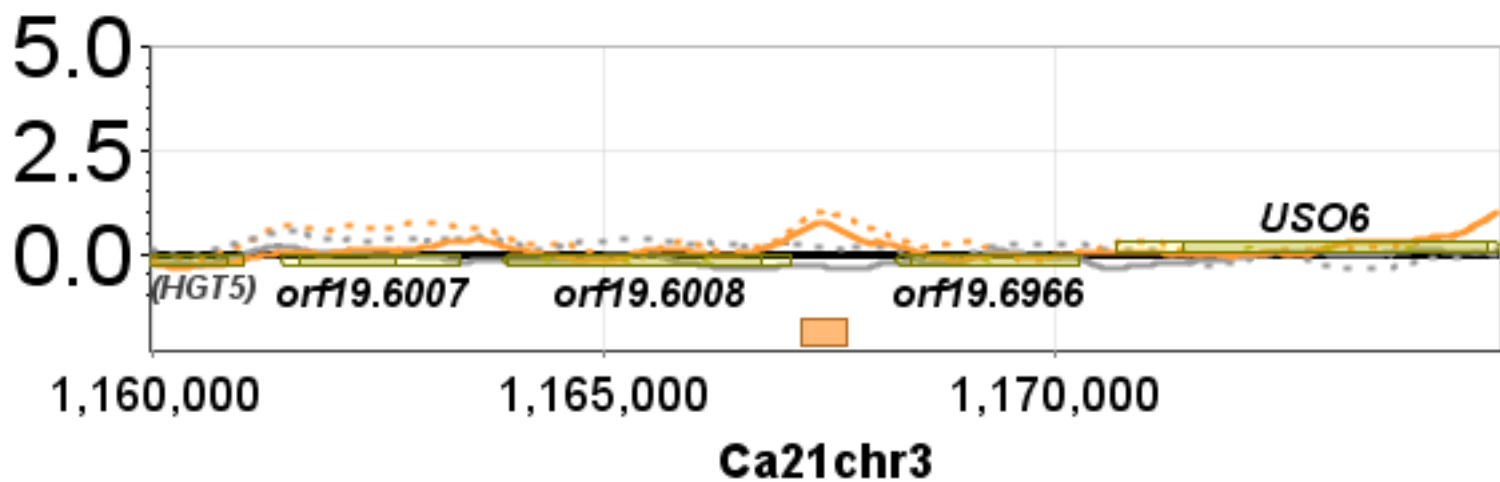

[1.051] Ca21chr4:1310156-1325155 [+] [PGA49, PPS1, ntar\_823, VPS11, ntar\_822]

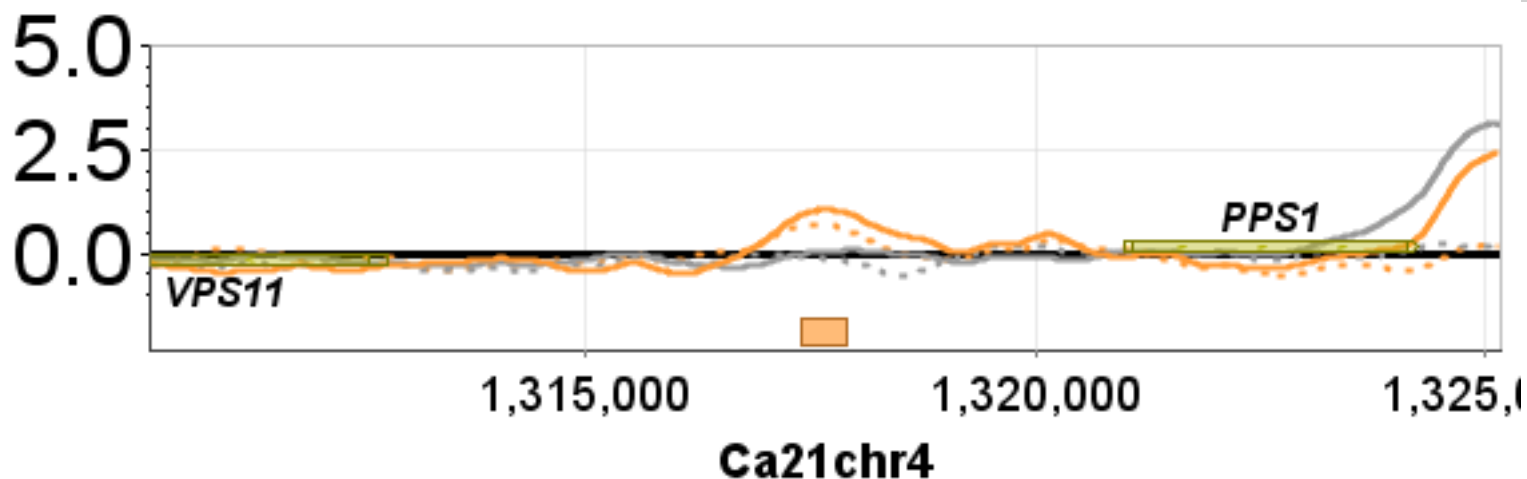

[1.049] Ca21chr5:1109997-1124996 [+] [orf19.4000, orf19.4001, DUN1, orf19.3999]

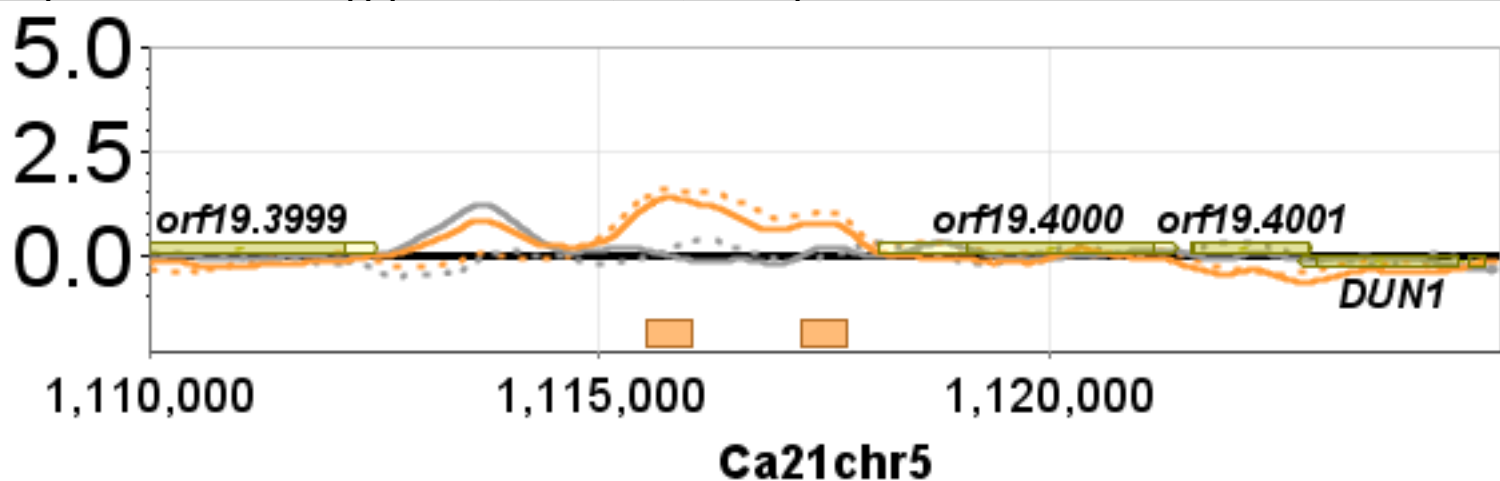

[1.048] Ca21chr1:2433197-2448196 [+] [ntar\_229, orf19.2308, orf19.2309, RPL2, orf19.2307]

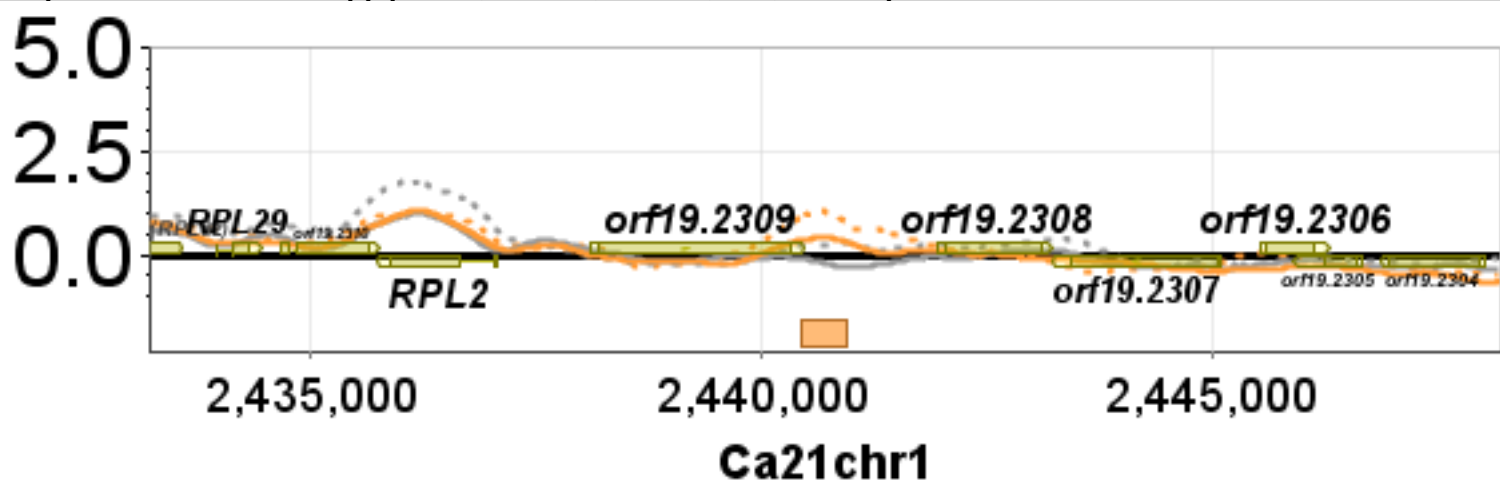

[1.047] Ca21chr1:225083-240082 [+] [ntar\_19, ntar\_20, ntar\_18, orf19.3302, orf19.3303]

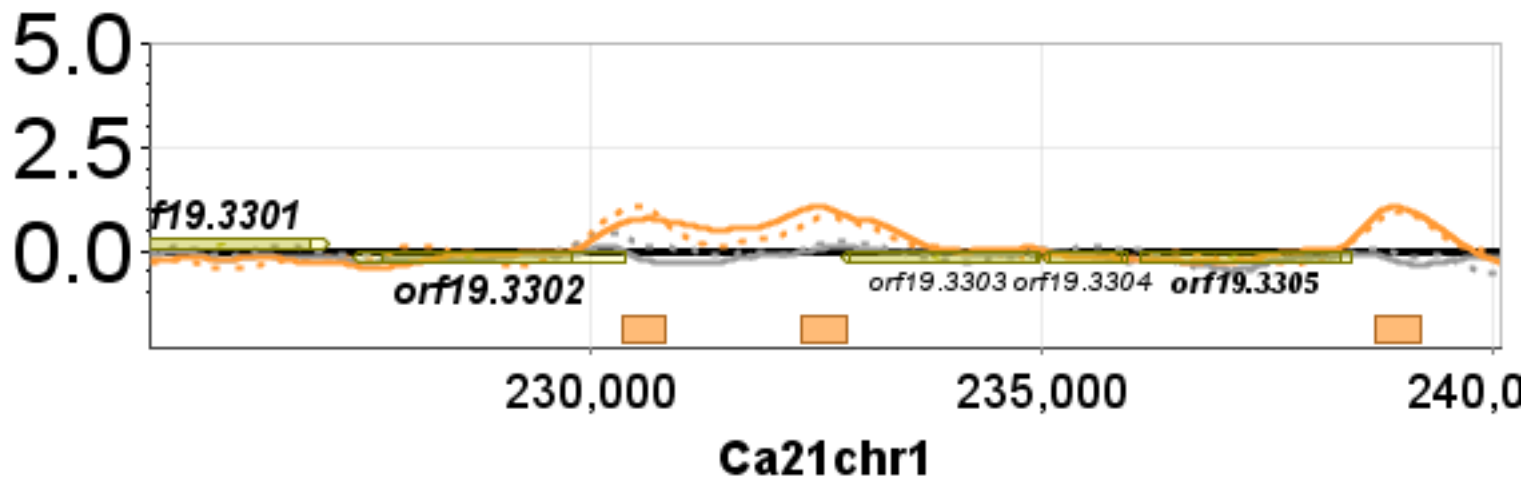

[1.045] Ca21chr2:773769-788768 [+] [orf19.850, orf19.851, orf19.849, SAP98, SAP99]

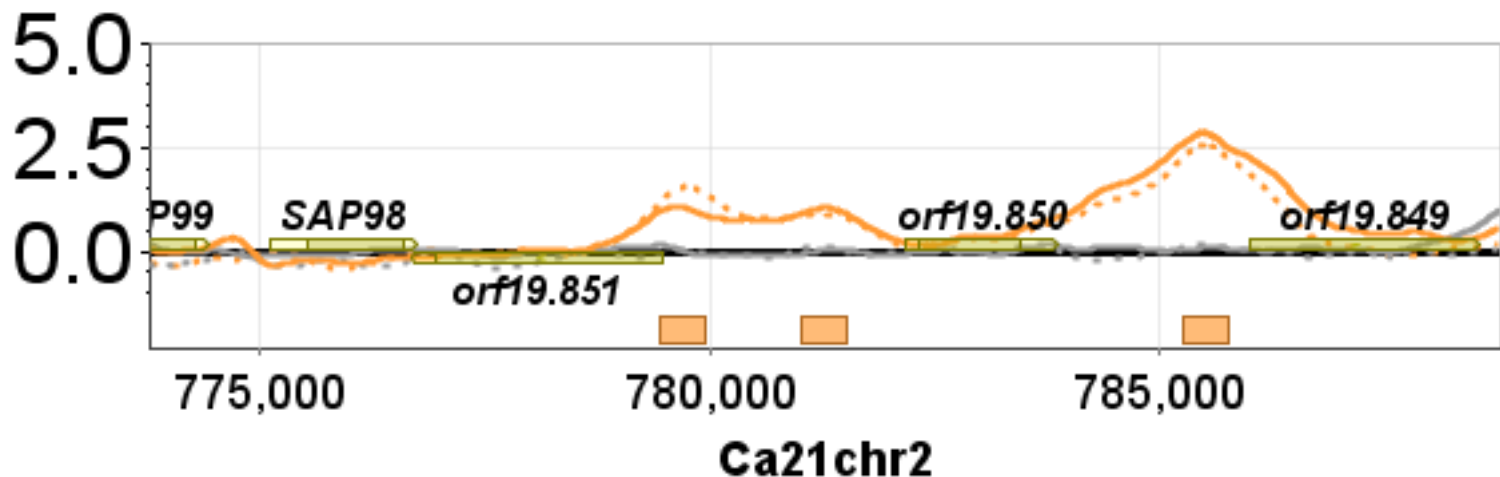

[1.045] Ca21chrR:69886-84885 [+] [orf19.7502, CDA2, orf19.7504, orf19.7501, PXA1]

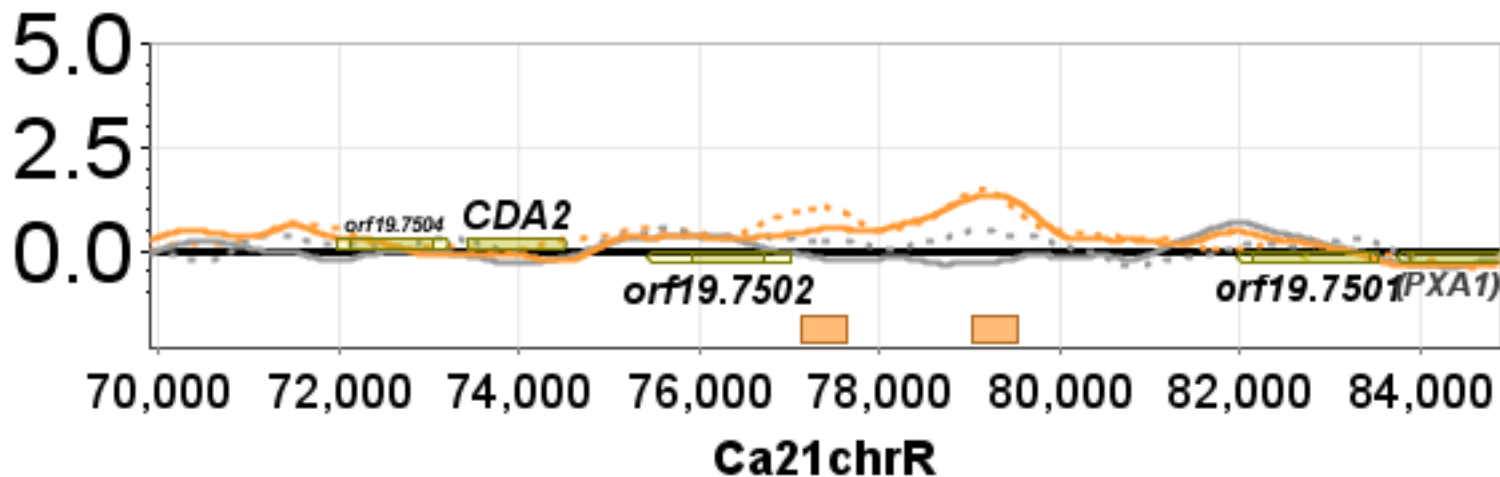

[1.043] Ca21chr2:2026571-2041570 [+] [FCY21, ntar\_489, ntar\_487, ntar\_488, orf19.1356]

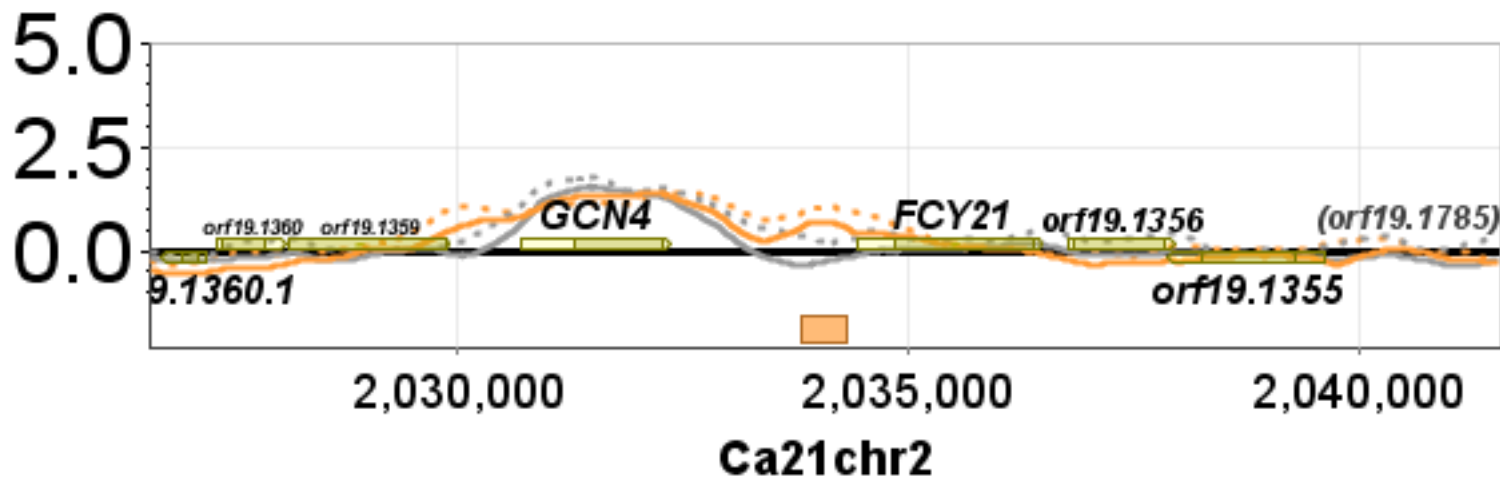

[1.042] Ca21chr6:609046-624045 [+] [orf19.5576, orf19.5578, orf19.5575, orf19.5579, orf19.5580]

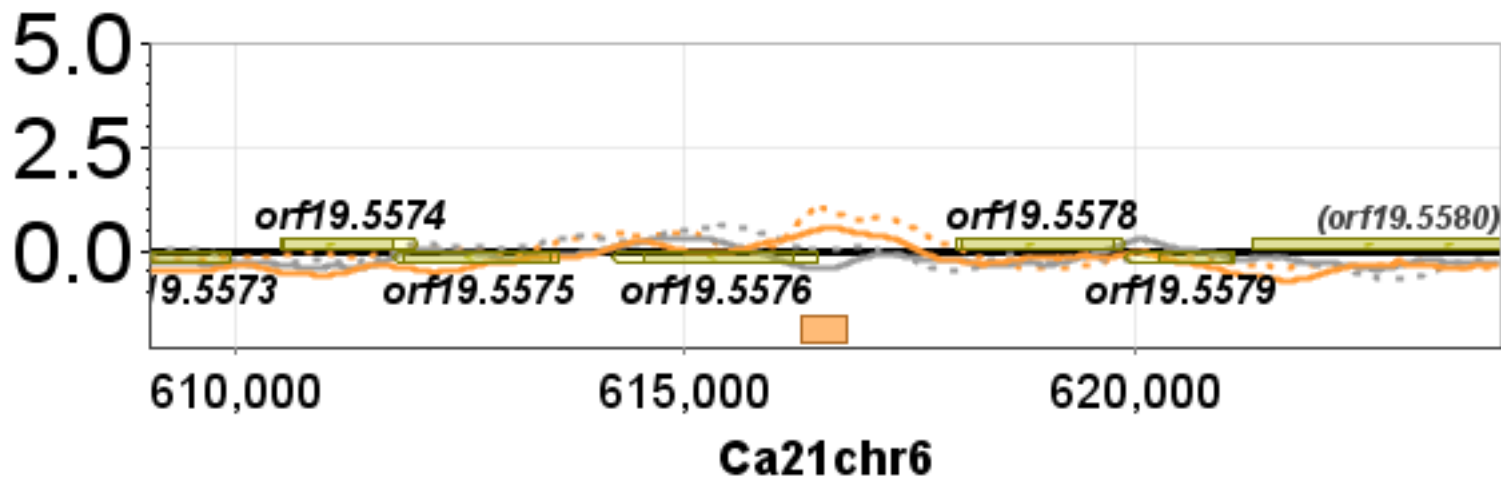

[1.035] Ca21chr3:409764-424763 [+] [orf19.1658, orf19.1656, ALG8, tk(uuu)1, DBP5]

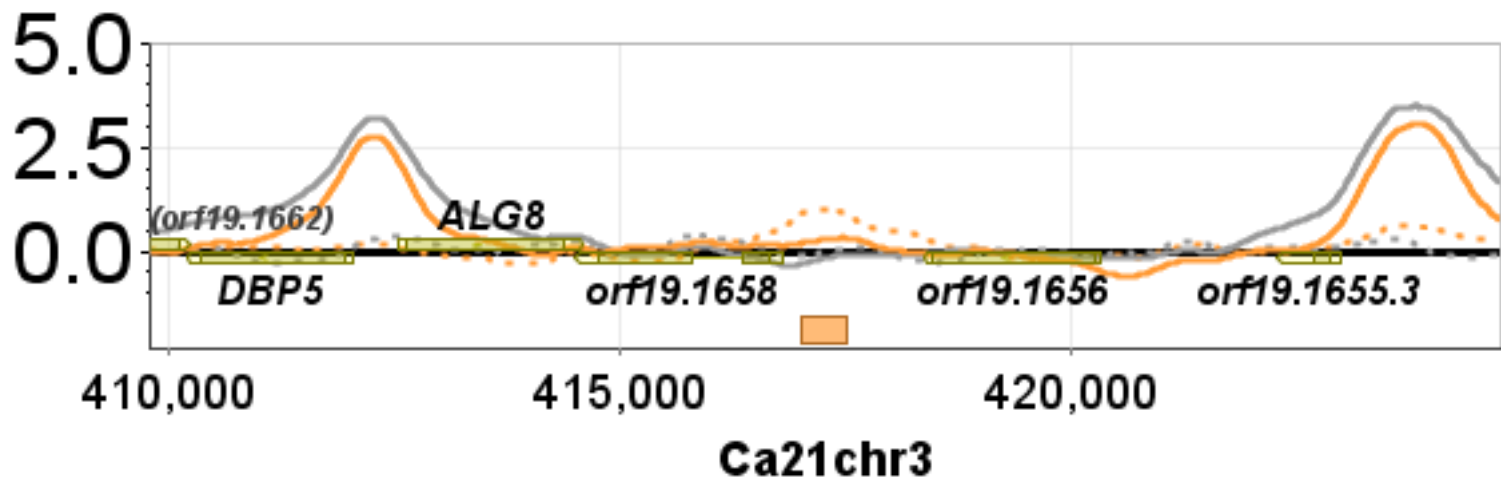

[1.035] Ca21chr7:320102-335101 [+] [ntar\_1090, BEM2, ALK6, orf19.6575, ntar\_1089]

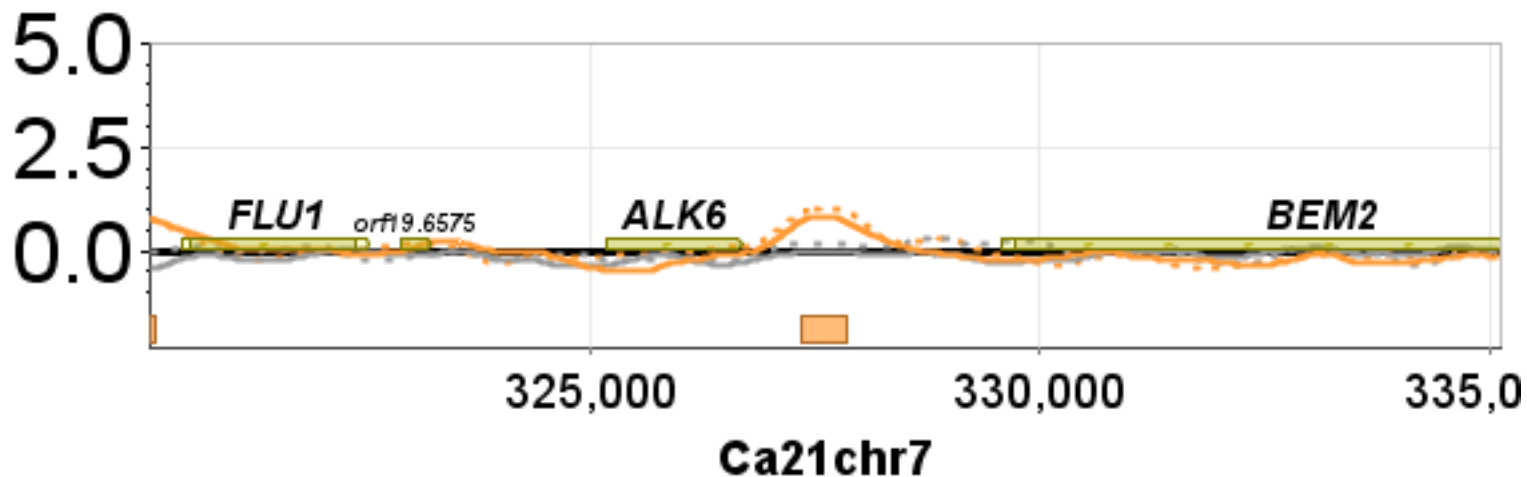

[1.034] Ca21chrR:1629887-1644886 [+] [orf19.2625, orf19.2624, RGD3, ECM22, orf19.729]

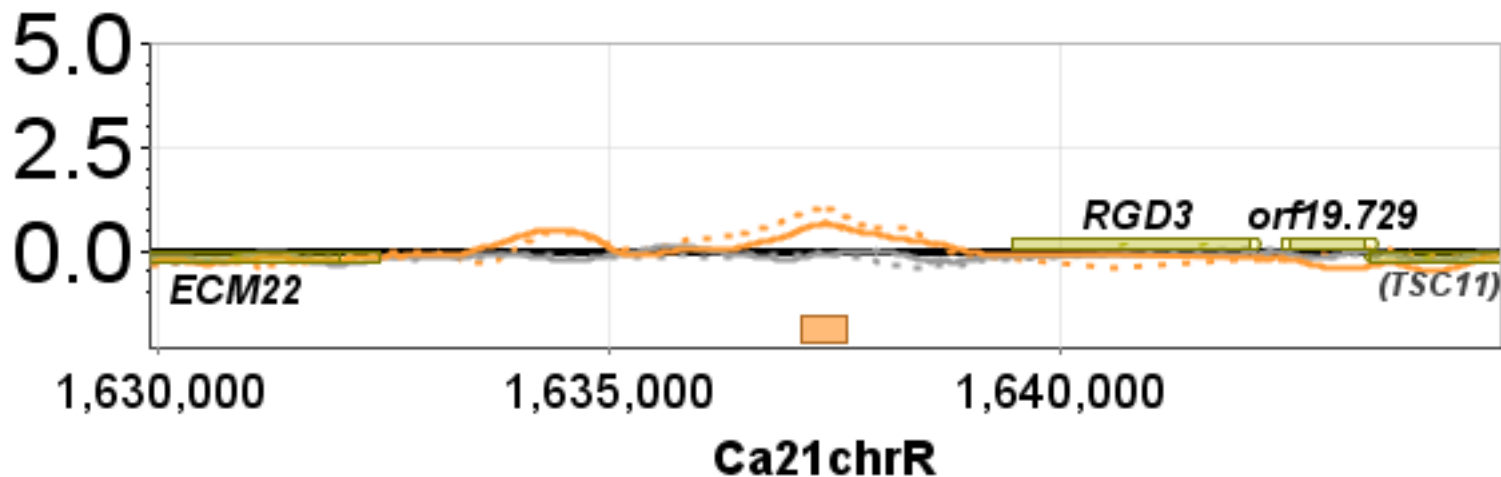

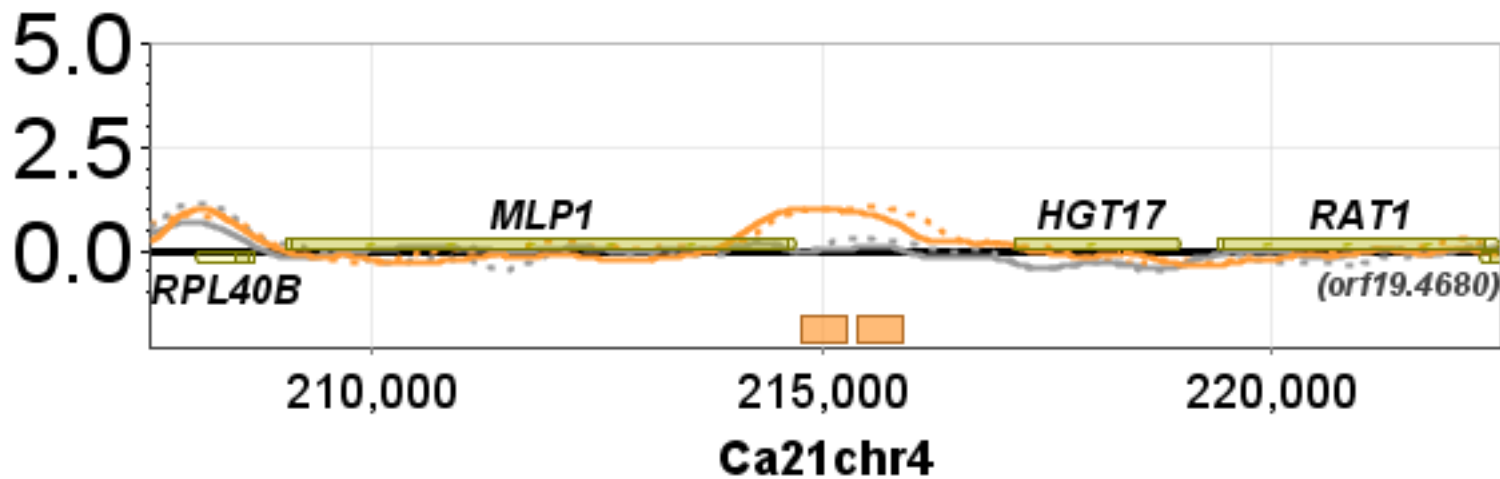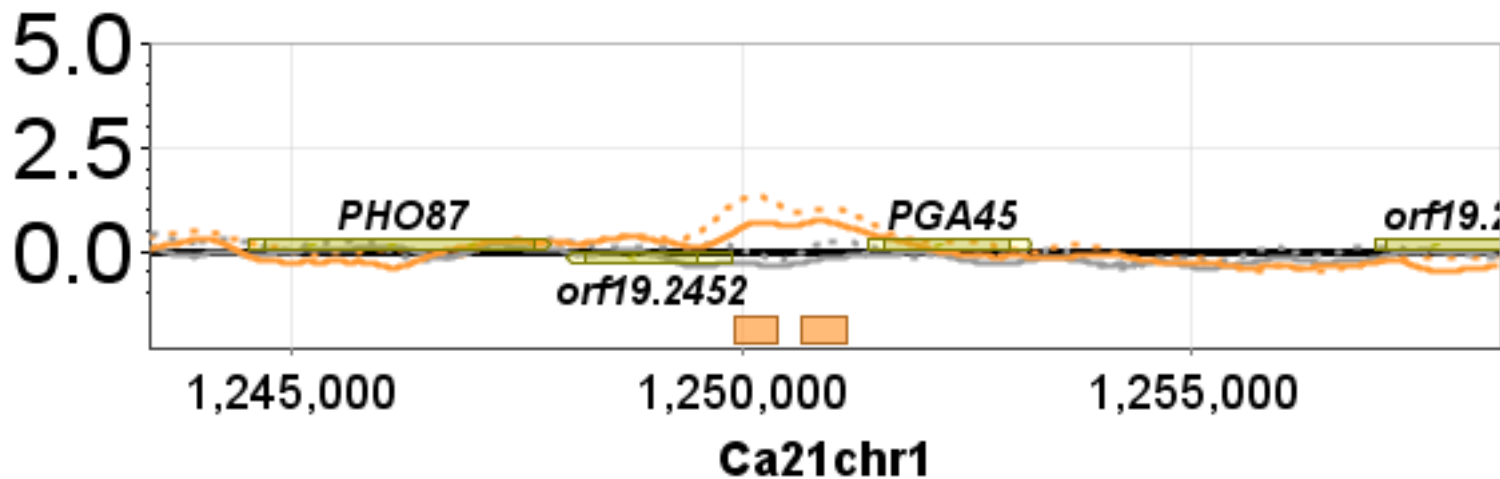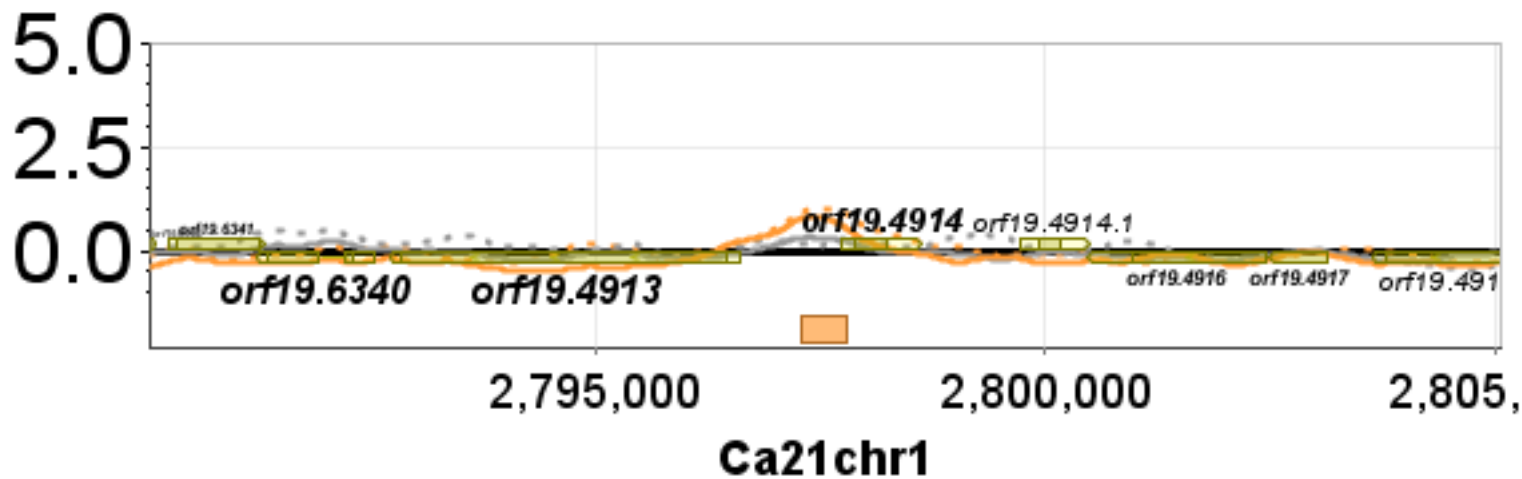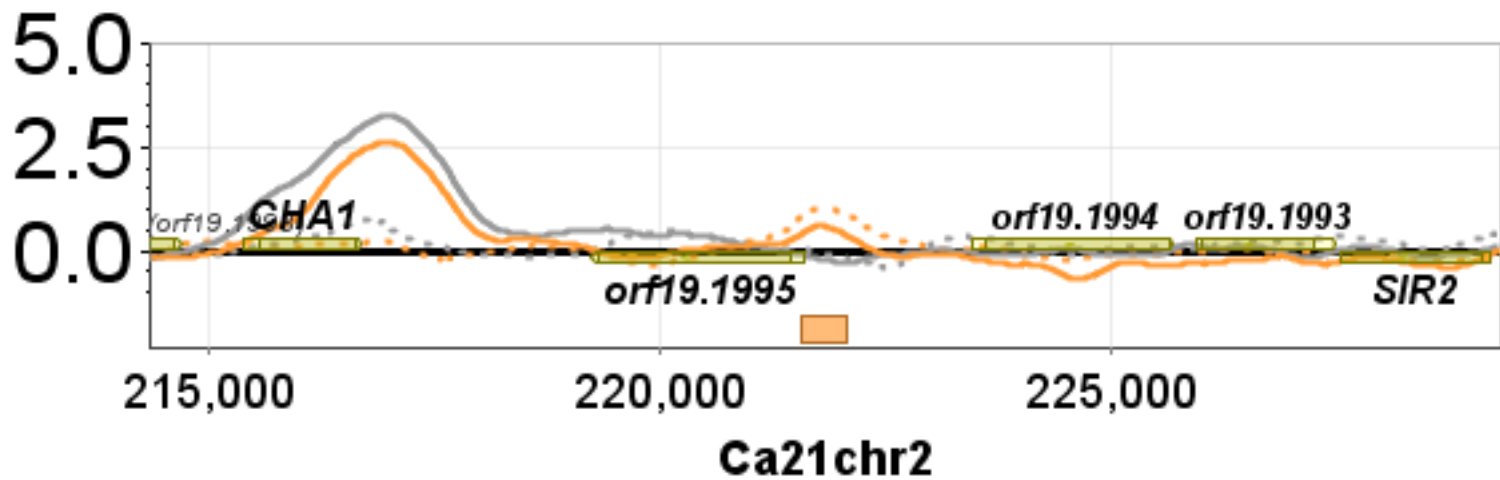

[1.025] Ca21chrR:1281085-1296084 [+] [orf19.3854, orf19.3852, CDC28, ntar\_1295, orf19.3858]

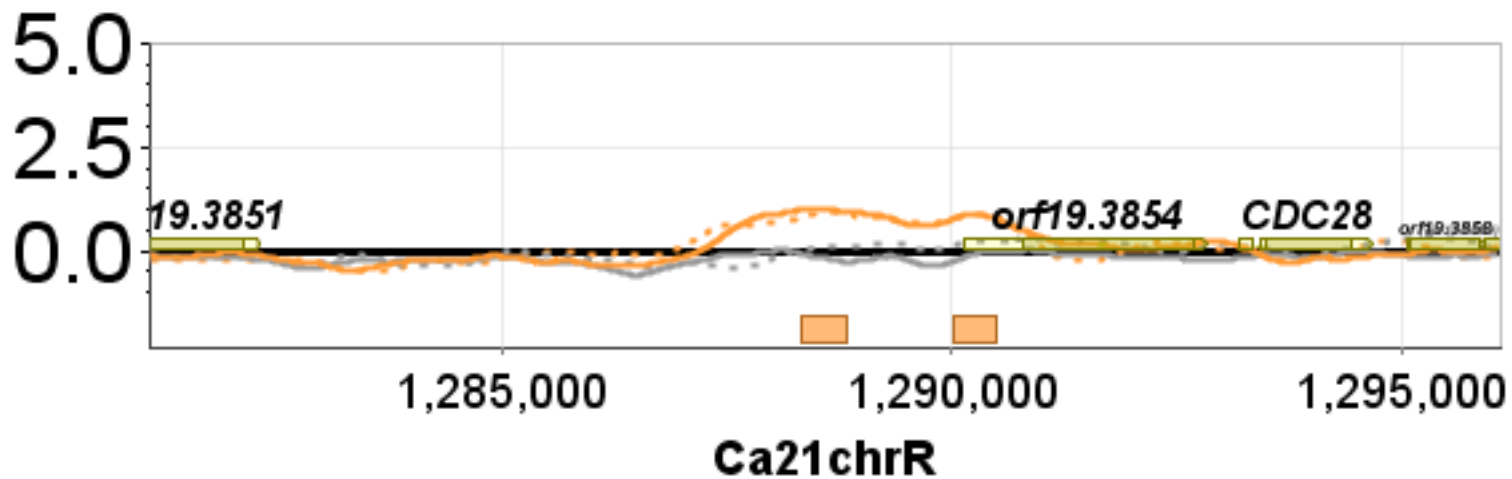

[1.019] Ca21chr4:558351-573350 [+] [orf19.2725, orf19.2726, orf19.2724, ntar\_769, GRX3]

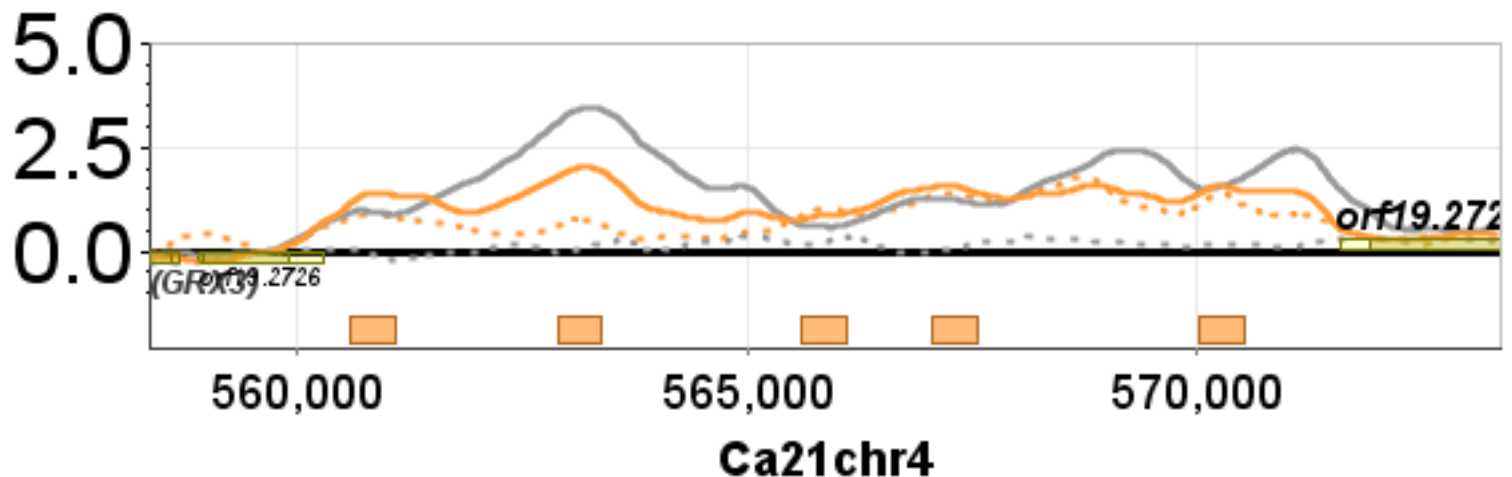

[1.014] Ca21chr1:658860-673859 [+] [ECM33, ntar\_67, orf19.3009, orf19.3010, ARO80]

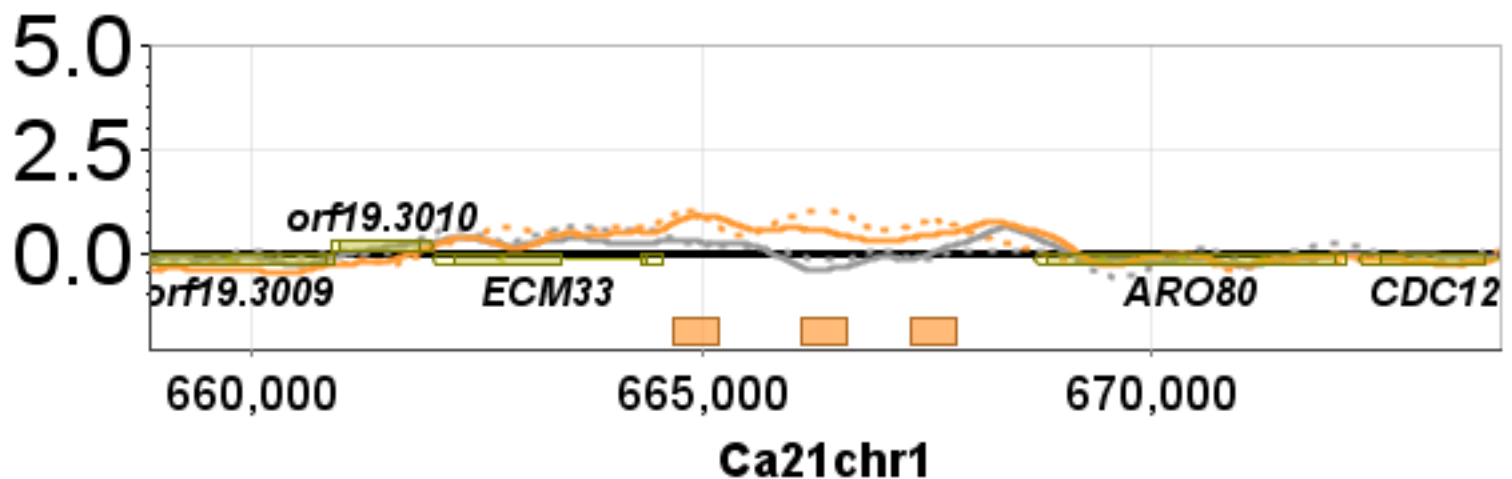

[1.013] Ca21chr7:910587-925586 [+] [NRG1, ntar\_1153, orf19.7151, ntar\_1152, ntar\_1151]

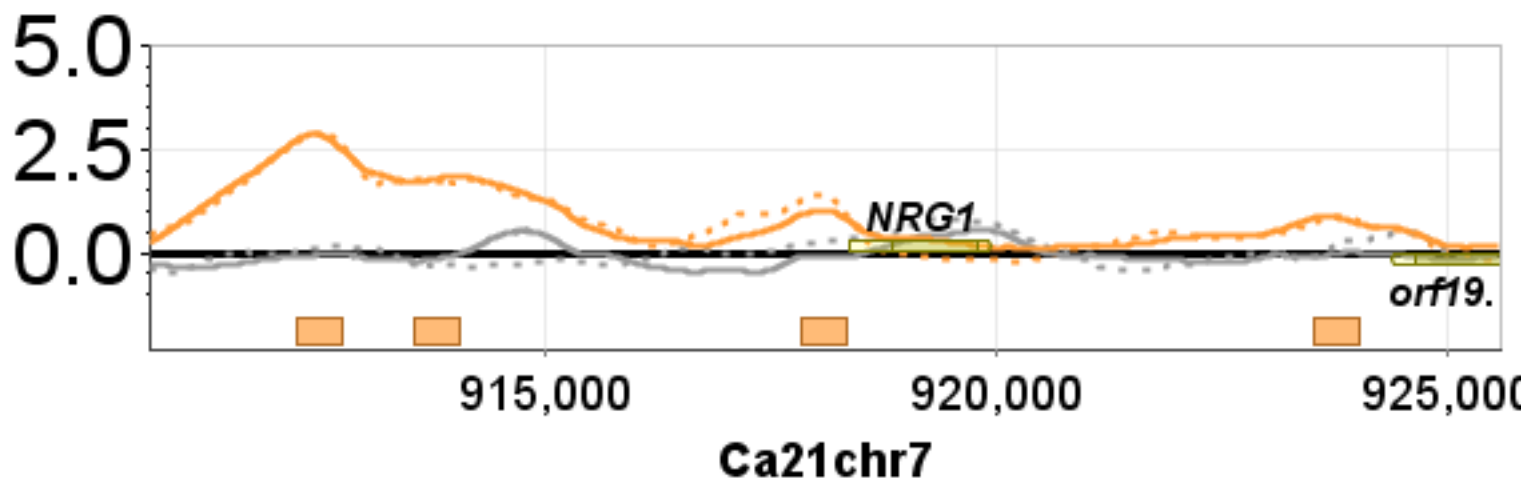



[1.009] Ca21chr3:1205587-1220586 [+] [orf19.6982, ntar\_632, orf19.6983, orf19.6981, orf19.6980]

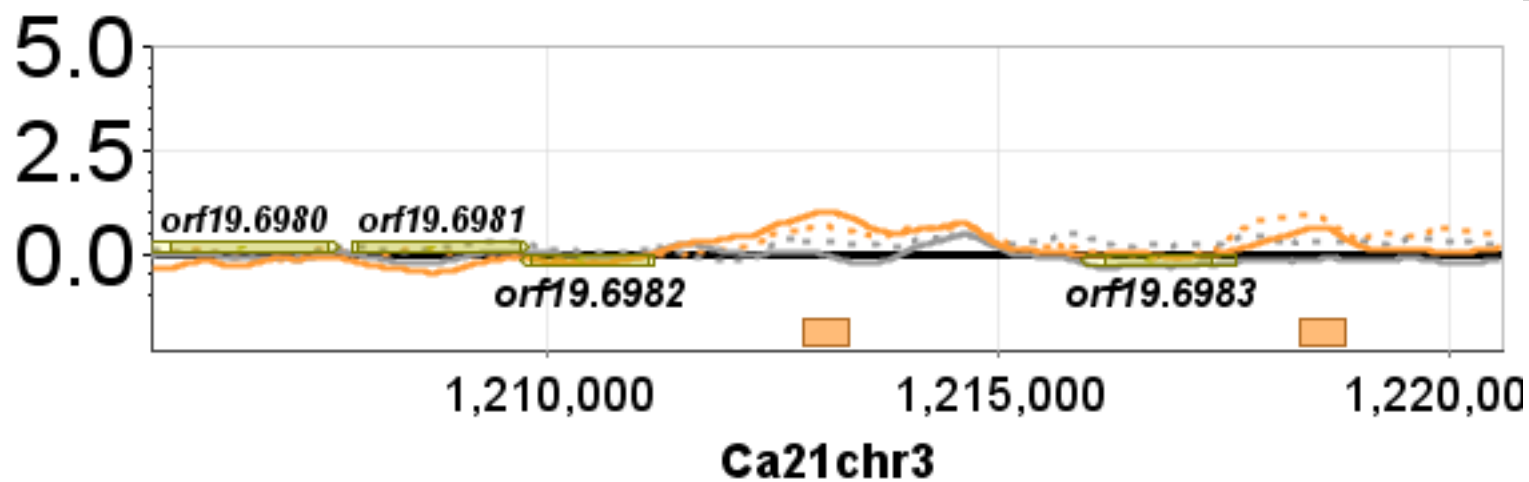

[1.008] Ca21chr3:326037-341036 [+] [ntar\_553, ntar\_552, CAS4, orf19.1691, TOS1]

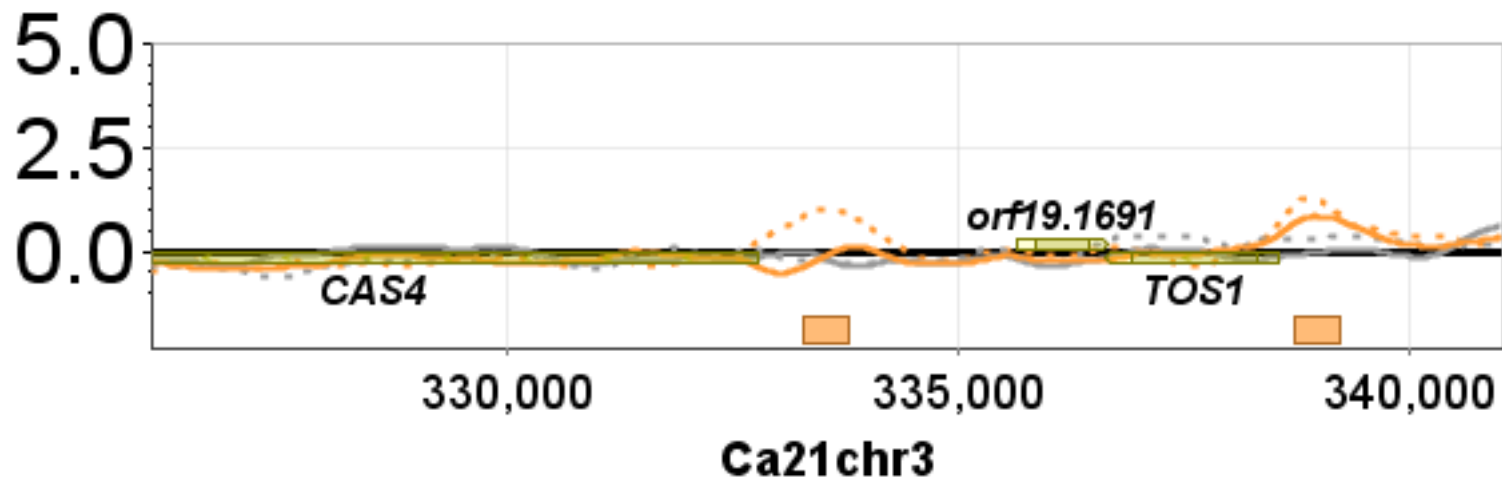

[1.008] Ca21chr4:1158041-1173040 [+] [ntar\_812, ntar\_811, orf19.1793, orf19.1792, orf19.1791]

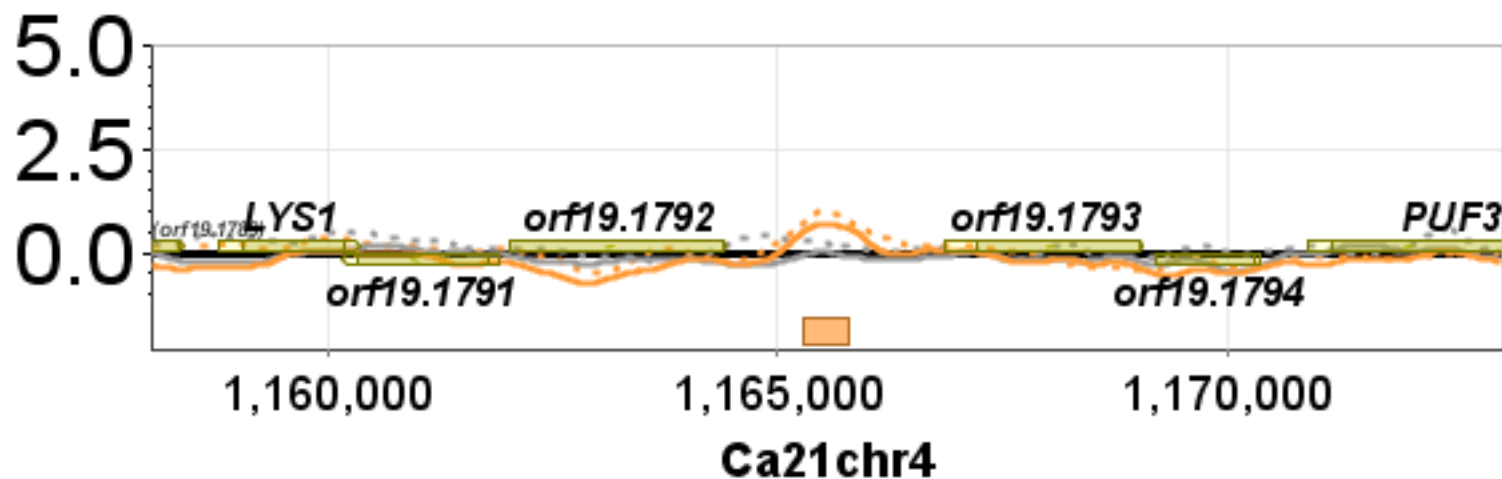

[1.007] Ca21chr2:1800785-1815784 [+] [orf19.217, BUD20, orf19.216.1, orf19.216, PIR1]

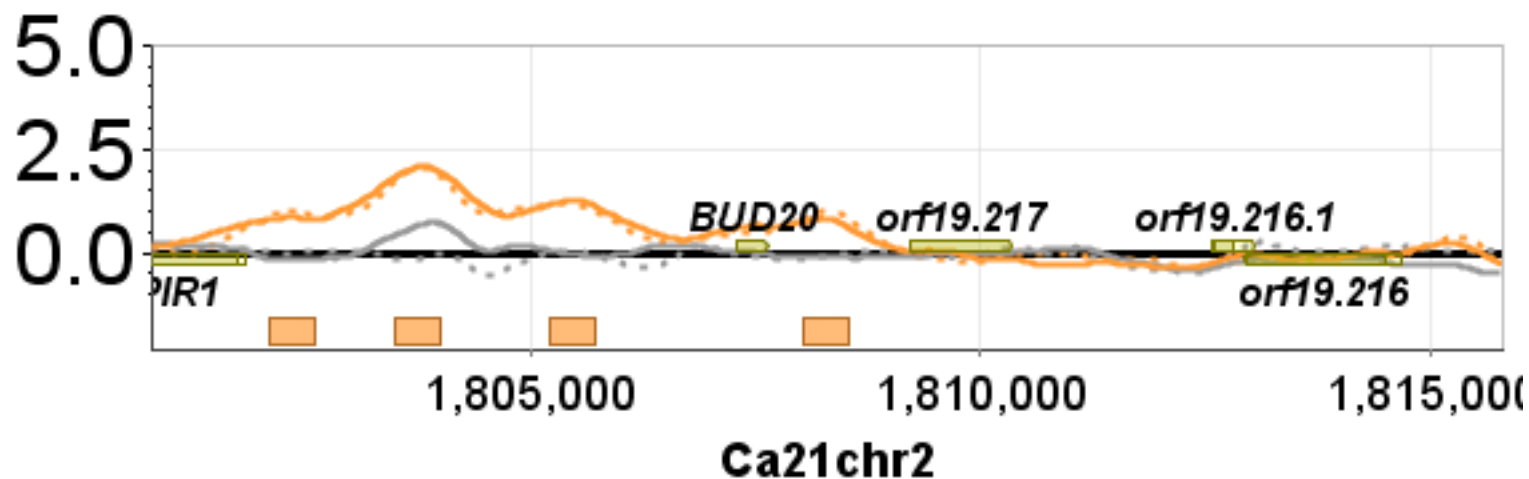

[1.007] Ca21chr4:1095672-1110671 [+] [ntar\_807, ntar\_808, ntar\_806, orf19.741, ntar\_804]

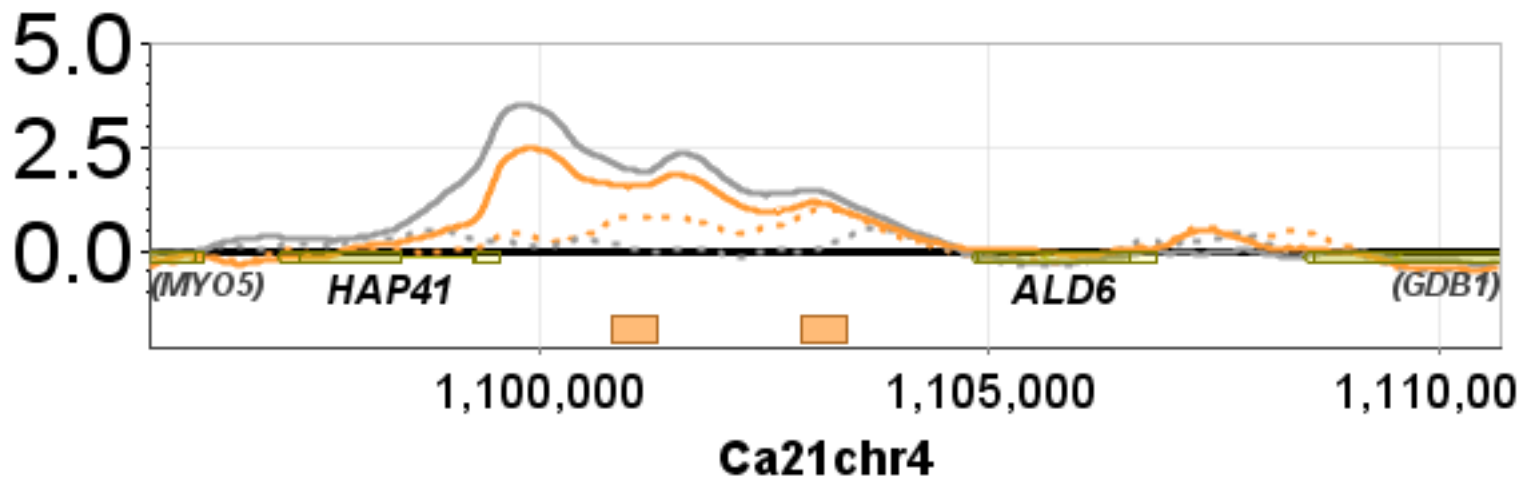

[1.005] Ca21chr3:145467-160466 [+] [ntar\_535, ntar\_536, MIH1, orf19.5376, HOS2]

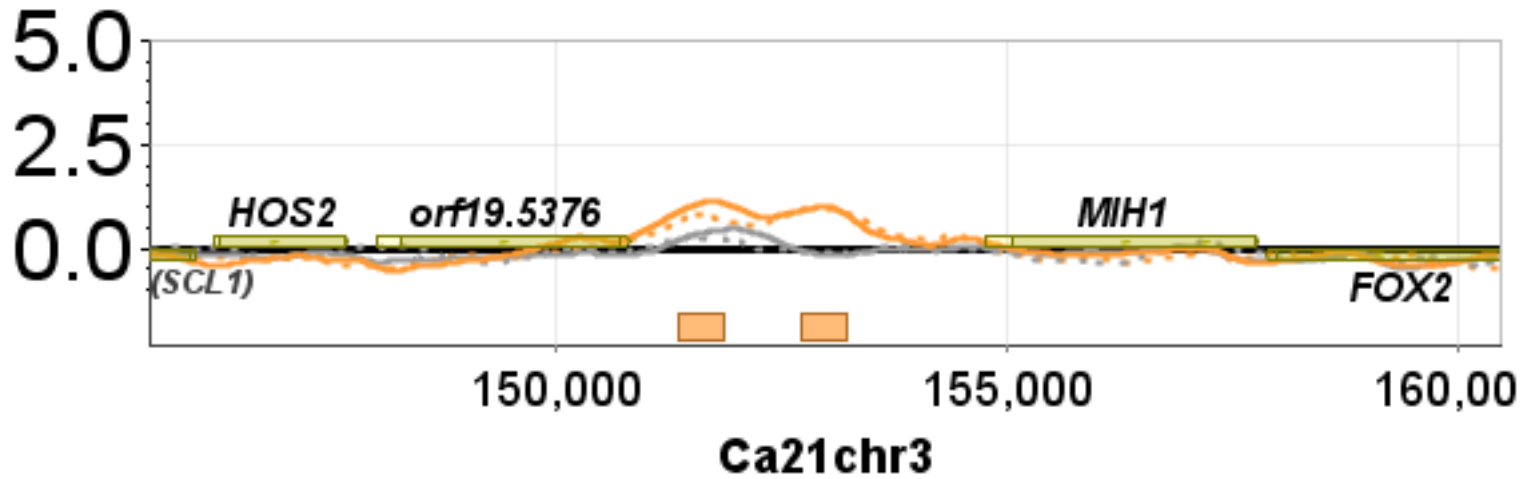

[1.001] Ca21chr2:1074253-1089252 [+] [ntar\_391, ntar\_390, orf19.3555, AAT1, tq(uug)3]

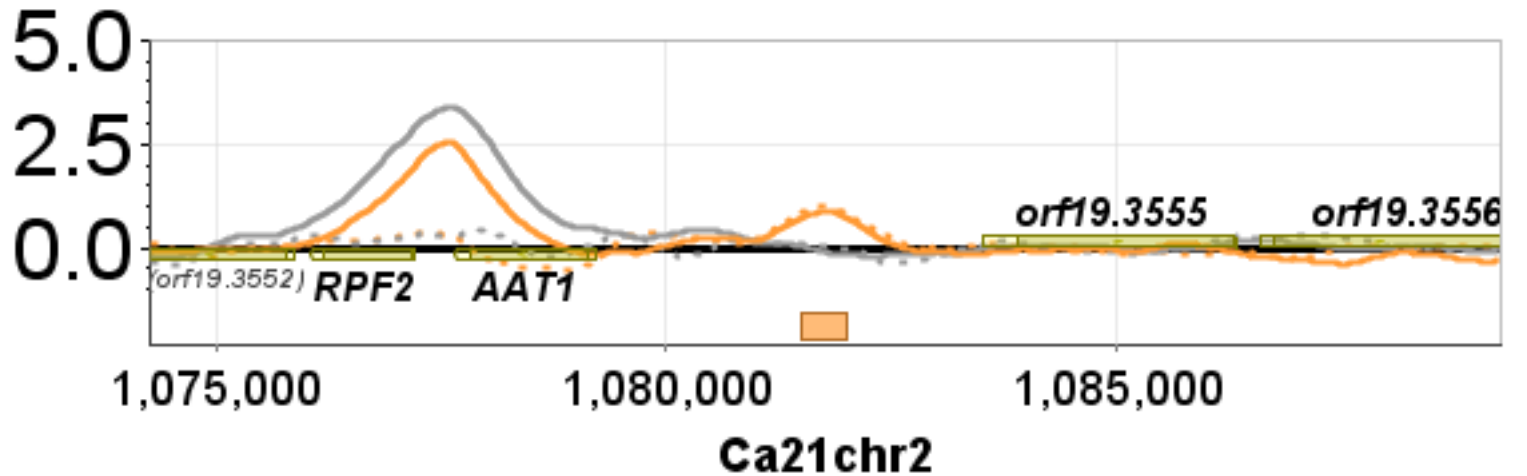

[1.0] Ca21chr2:609359-624358 [+] [PR26, SHE9, PI-PLC, SMP3, IDH2]

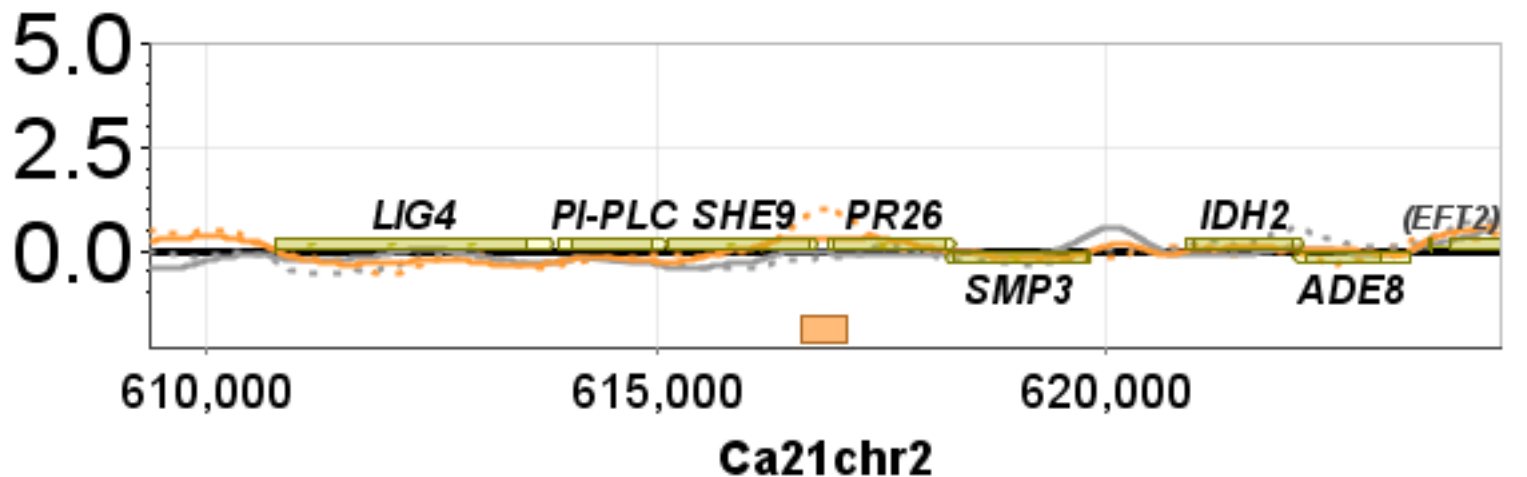

[0.994] Ca21chr2:1387134-1402133 [+] [ntar\_424, orf19.2231, RPL11, orf19.2230, orf19.2229]

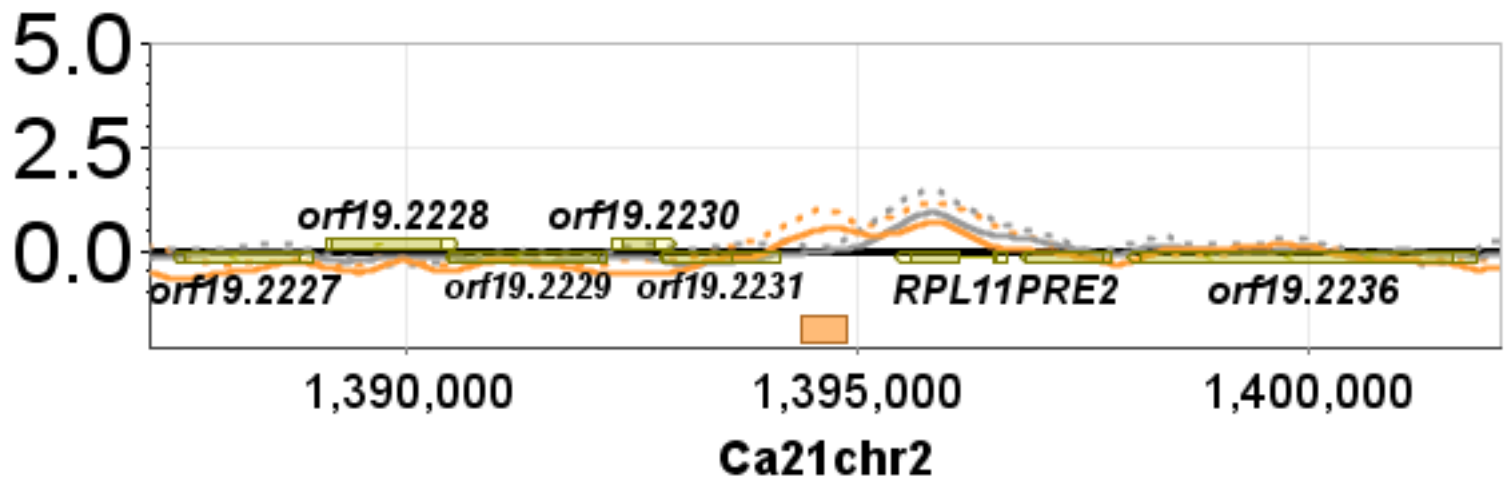

[0.994] Ca21chr3:373191-388190 [+] [ntar\_558, UTR2, BRO1, orf19.1672, AFG3]

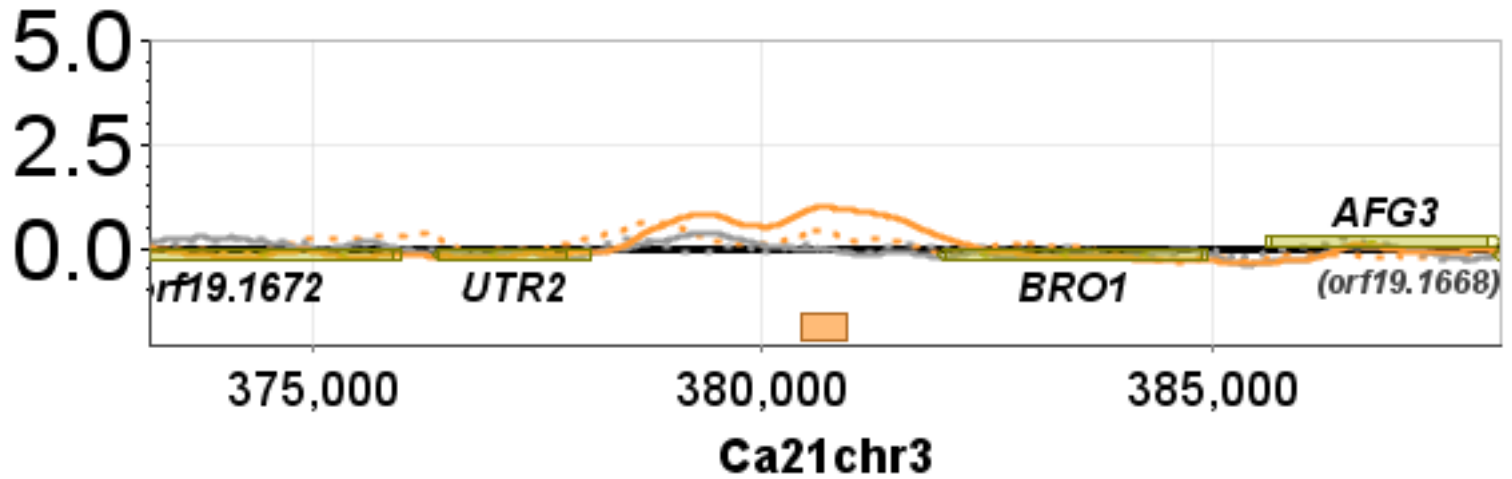

[0.994] Ca21chr4:824495-839494 [+] [FGR28, ntar\_787, RAM1, orf19.1595, ntar\_786]

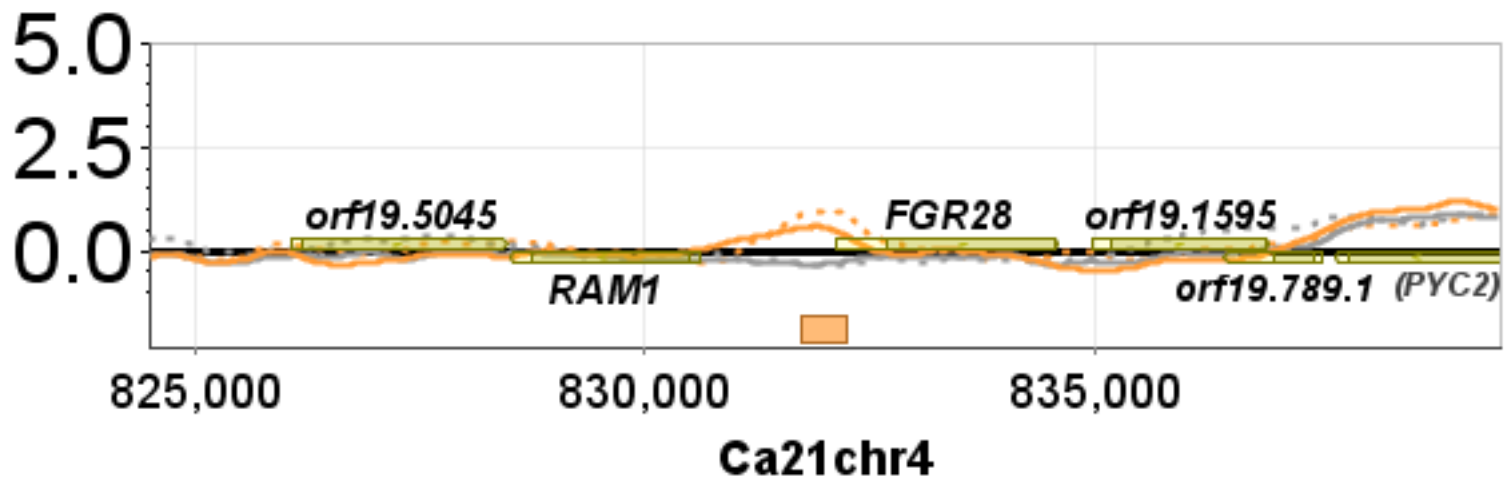

[0.993] Ca21chr2:1213645-1228644 [+] [orf19.4122, orf19.4121, LAS1, TES1, orf19.5216]

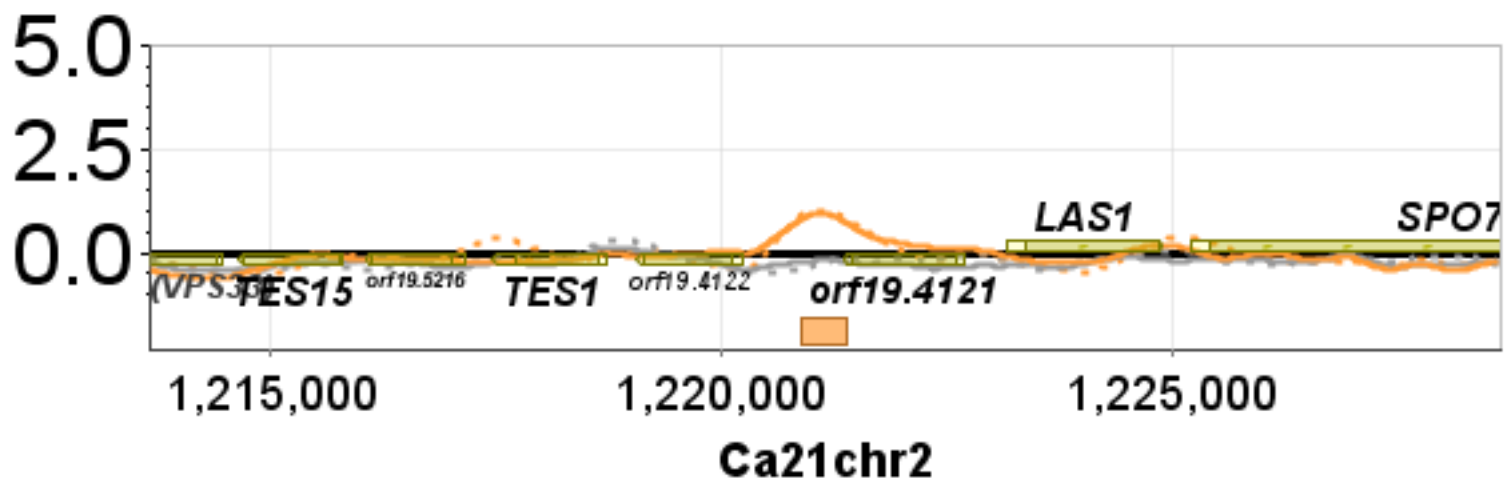

[0.992] Ca21chr2:2047785-2062784 [+] [MP65, orf19.1778, orf19.1777, orf19.1780, orf19.1782]

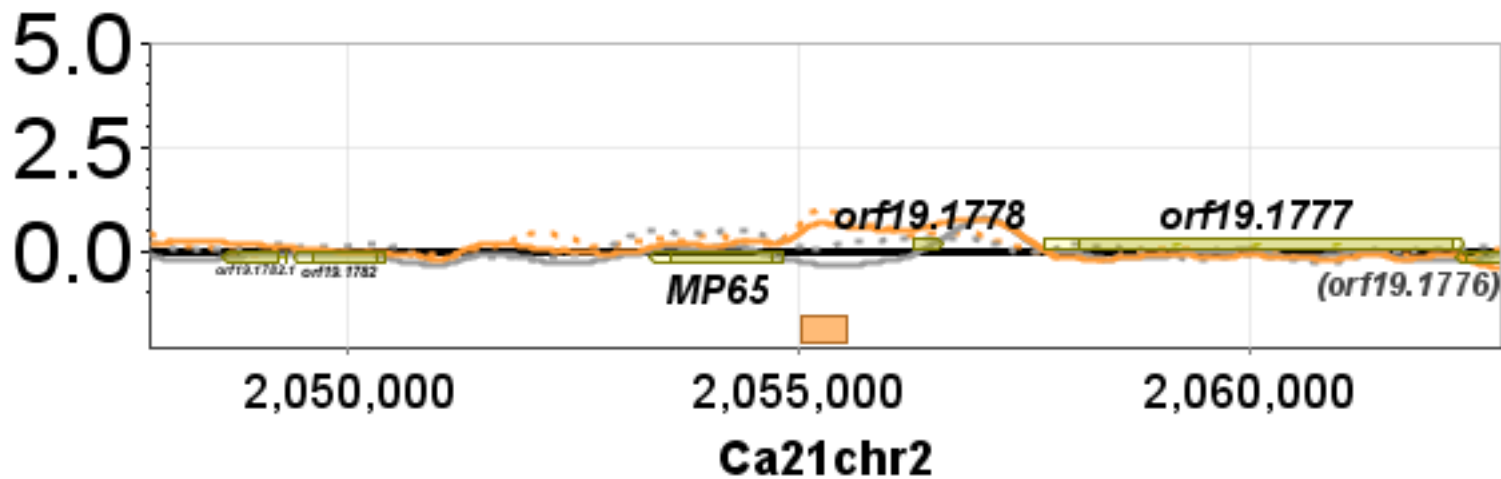

[0.989] Ca21chr4:631733-646732 [+] [PGA54, ntar\_775, orf19.2684, ntar\_774, ntar\_773]

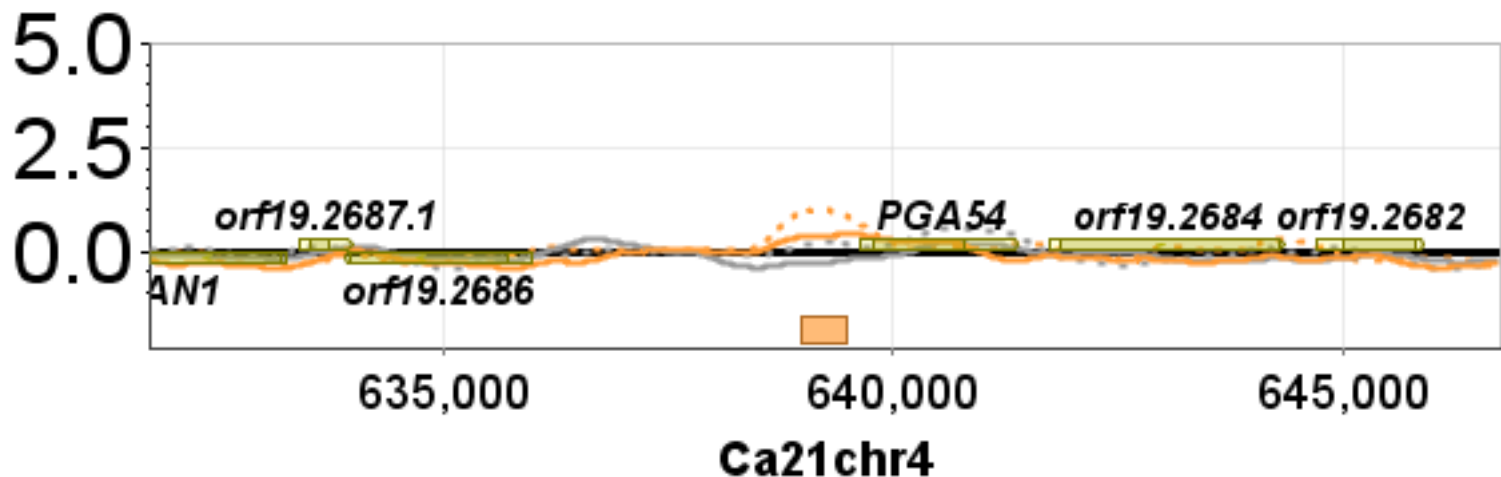

[0.987] Ca21chr1:2467452-2482451 [+] [ntar\_233, orf19.675, orf19.675.1, orf19.674, orf19.676]

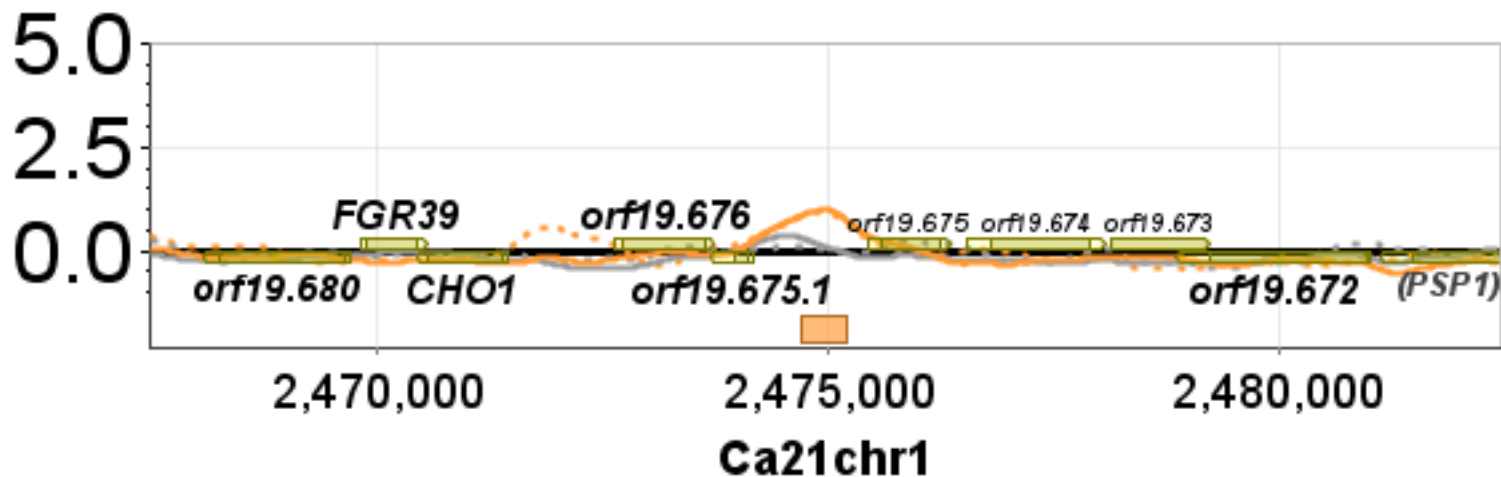

[0.987] Ca21chr6:501047-516046 [+] [orf19.5513, orf19.5514, orf19.5515, orf19.5516, orf19.5510]

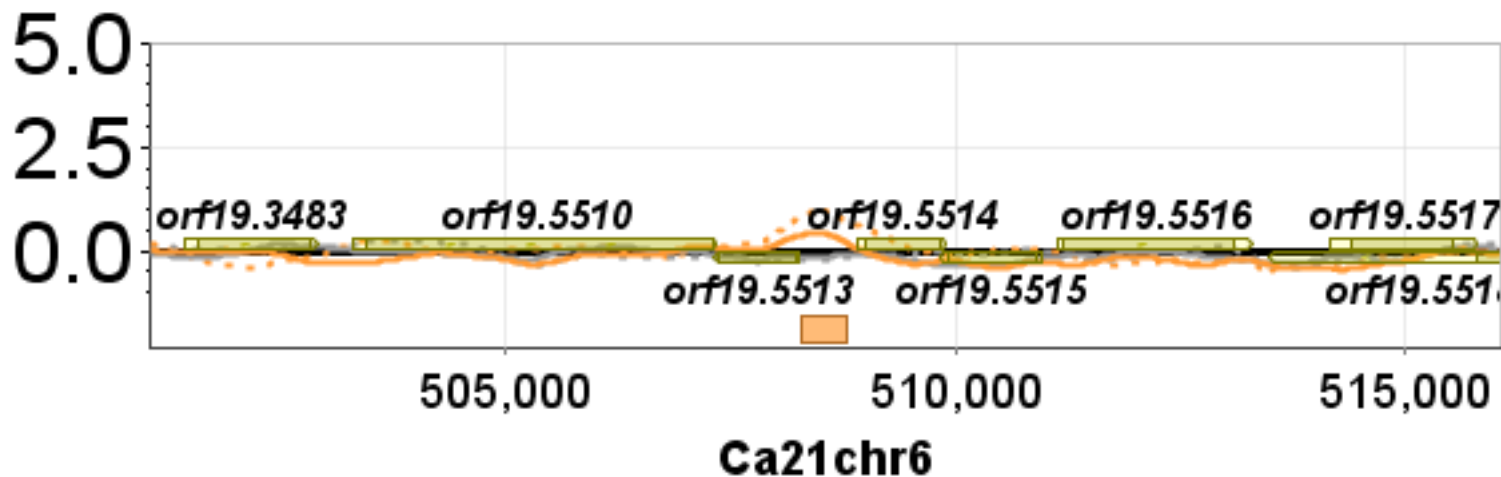

[0.985] Ca21chr1:657447-672446 [+] [ECM33, ntar\_67, orf19.3009, orf19.3010, COQ4]

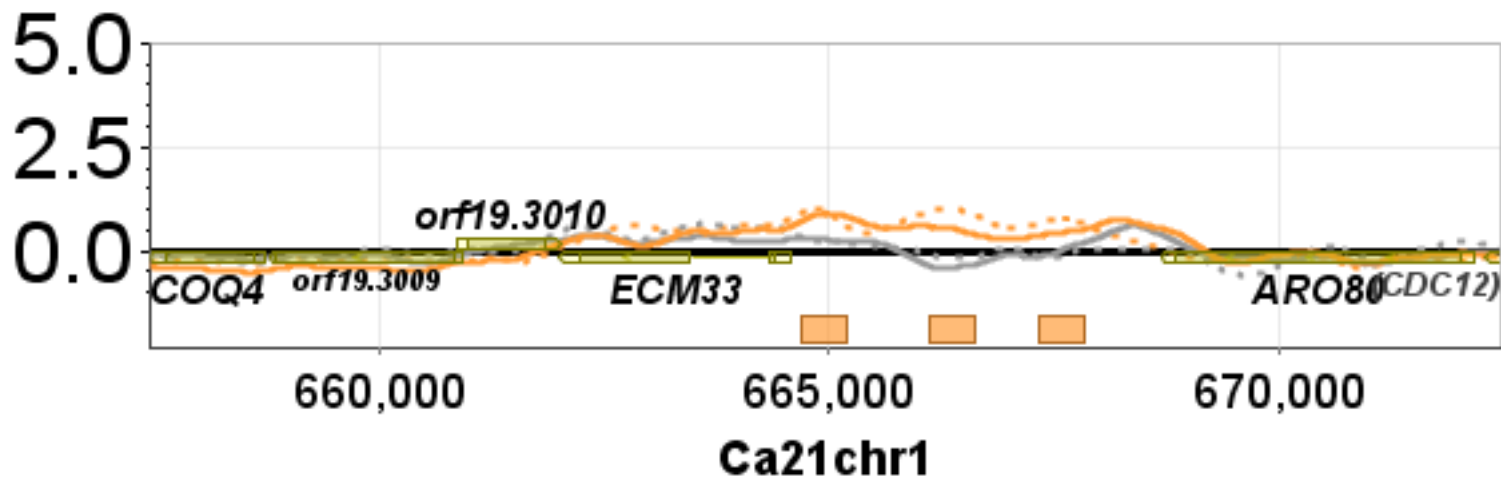

[0.985] Ca21chr7:763233-778232 [+] [orf19.6705, GYP7, orf19.6704, ntar\_1141, orf19.6707]

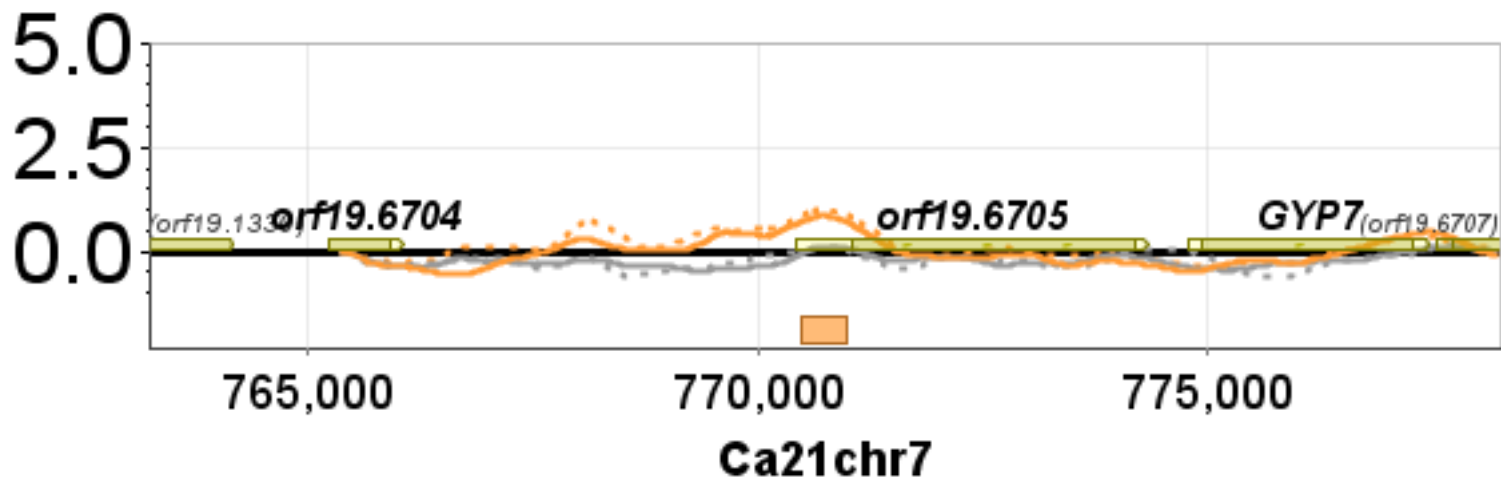

[0.984] Ca21chrR:870764-885763 [+] [orf19.467, ntar\_1253, ntar\_1254, ntar\_1255, HST7]

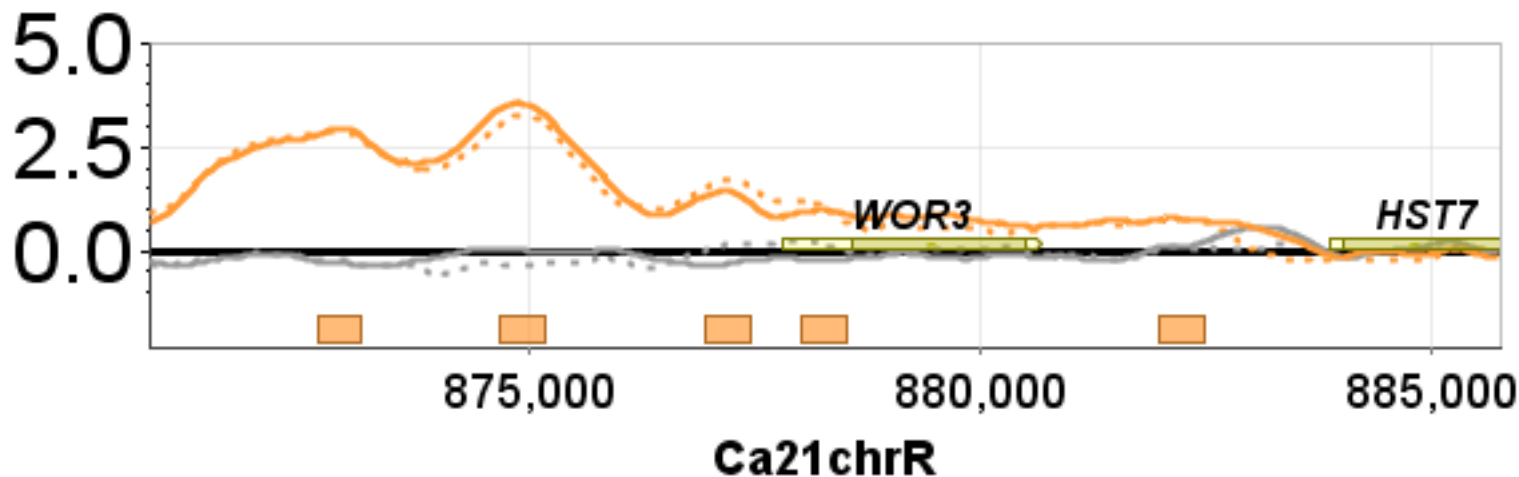

[0.983] Ca21chr2:1794857-1809856 [+] [PIR1, orf19.223, BUD20, orf19.225, orf19.217]

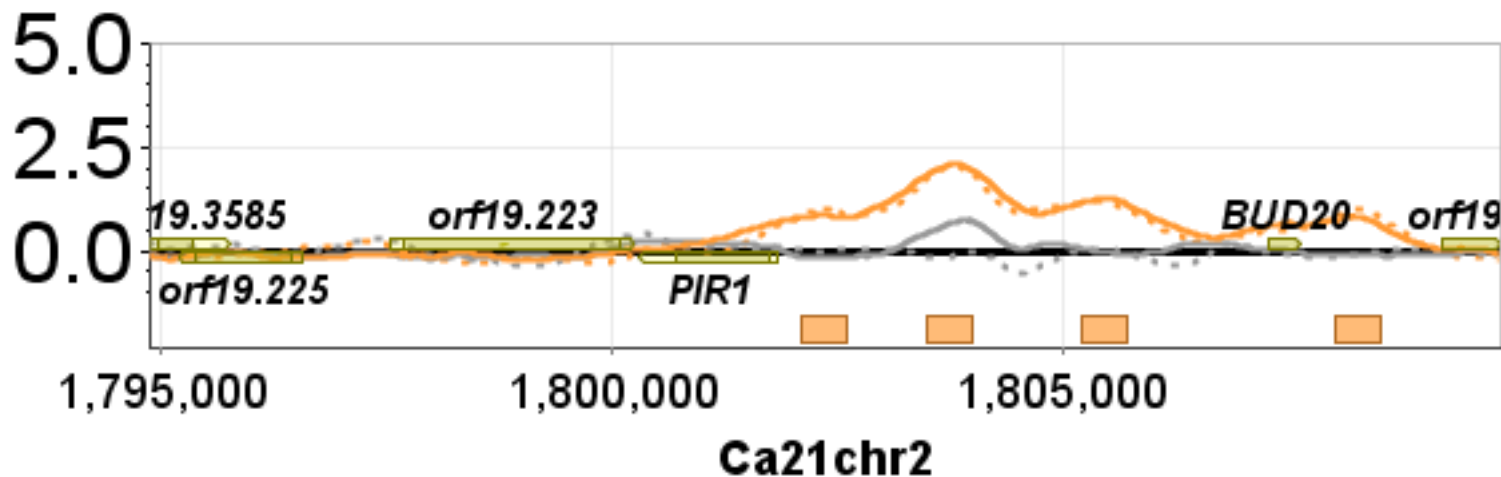

[0.981] Ca21chr5:160607-175606 [+] [HYR3, IFF8, SPE2, ntar\_858, CTF8]

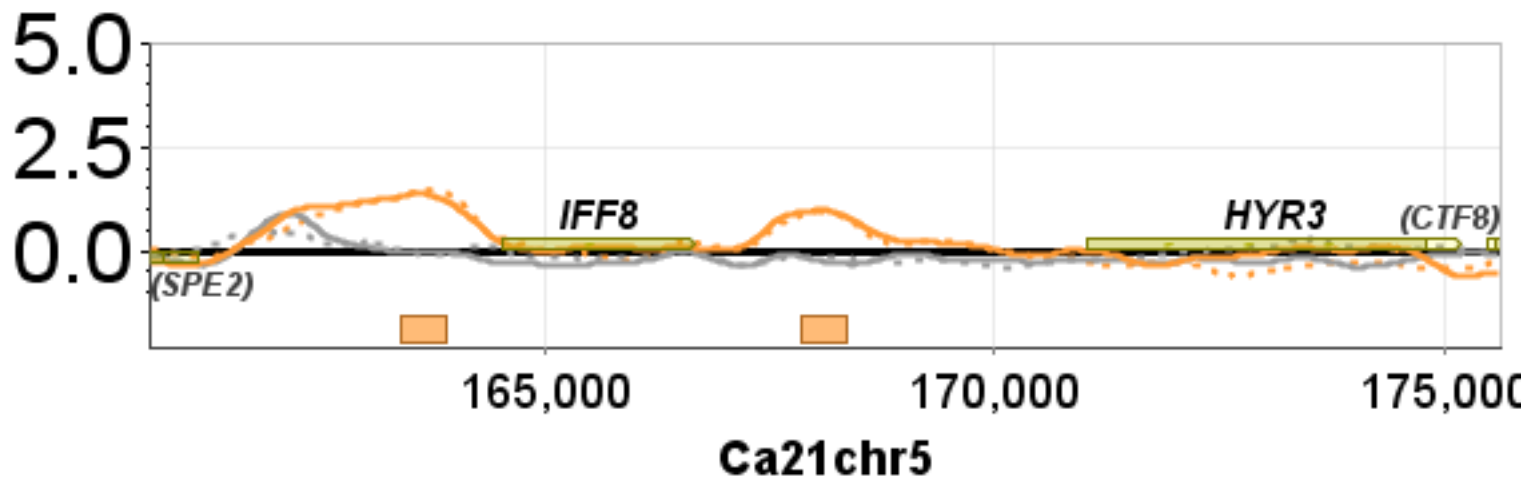

[0.979] Ca21chr1:1993769-2008768 [+] [SSU81, ntar\_188, ntar\_189, ntar\_190, AOX2]

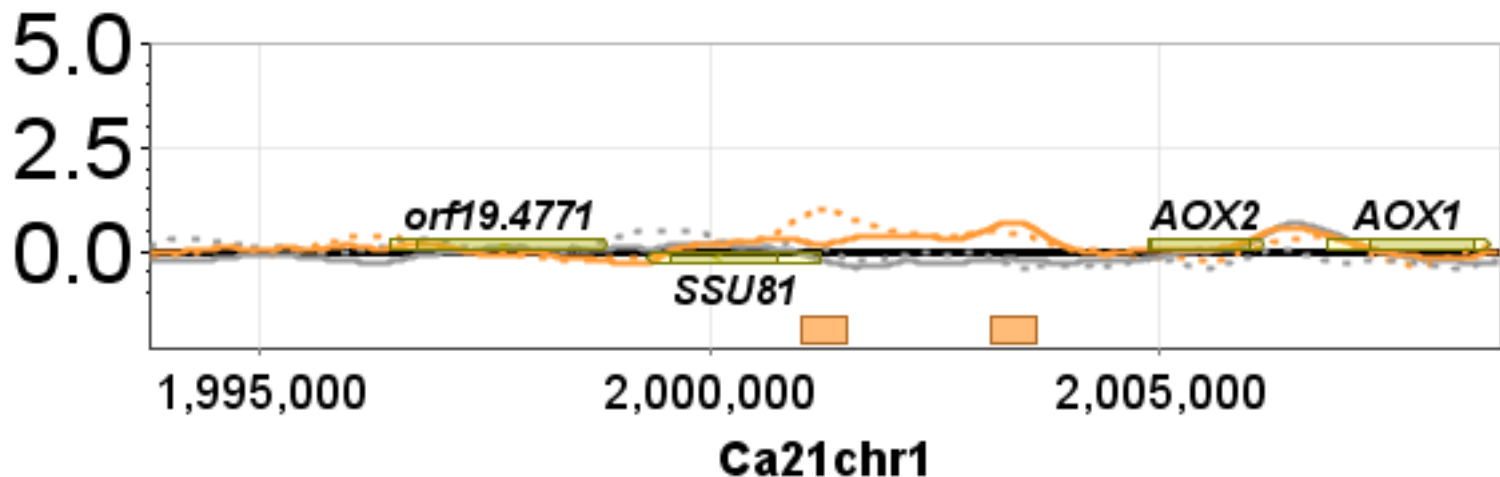

[0.973] Ca21chr7:33462-48461 [+] [HGT12, orf19.7095, orf19.7096, HGT13, orf19.7092]

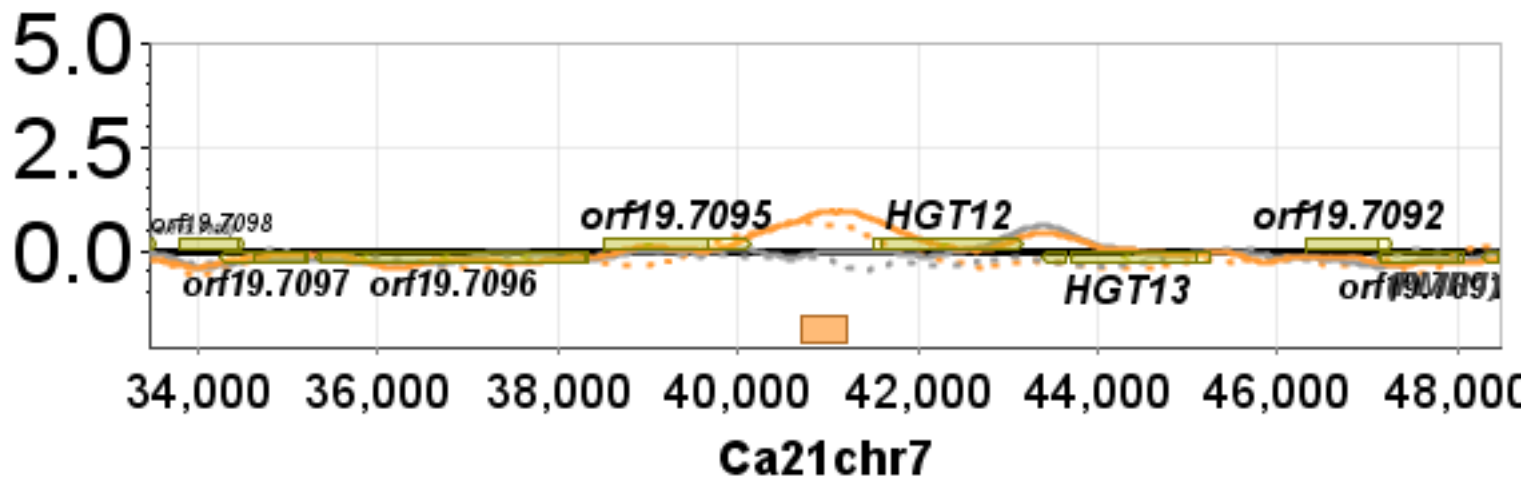

[0.969] Ca21chr7:15895-30894 [+] [FAR1, orf19.7106, ntar\_1053, orf19.7104, orf19.7107]

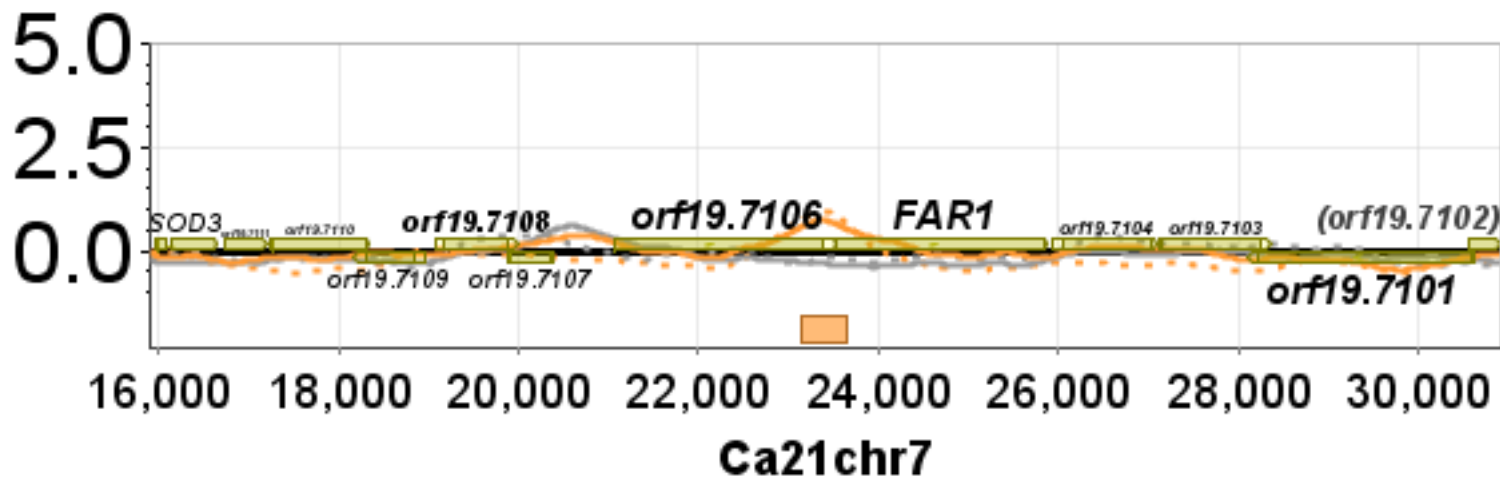

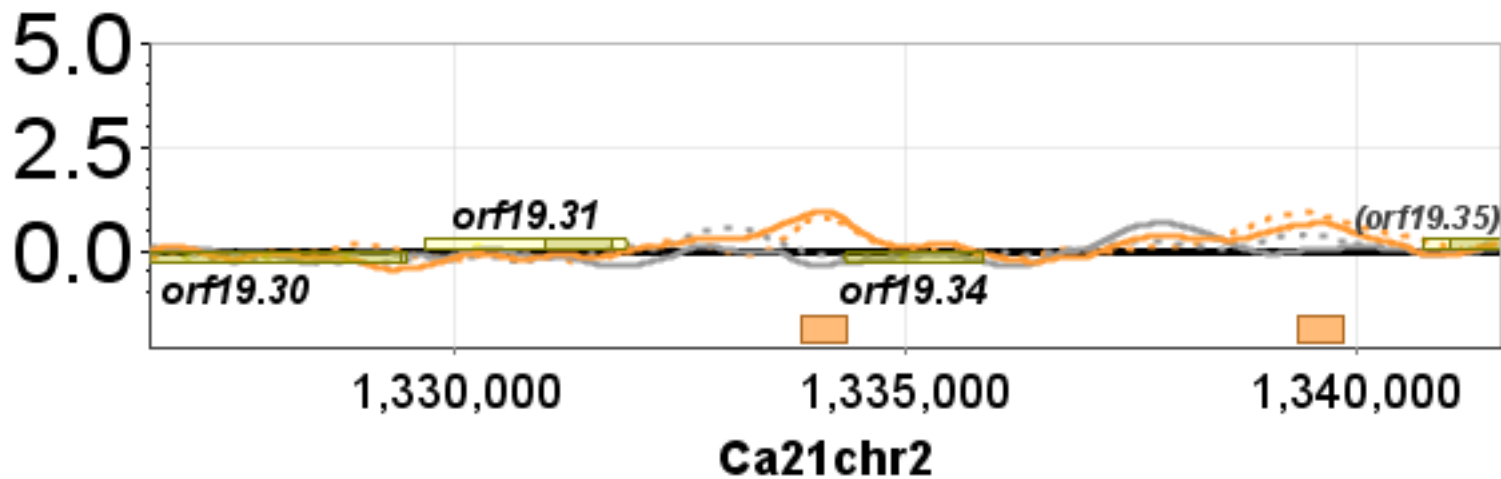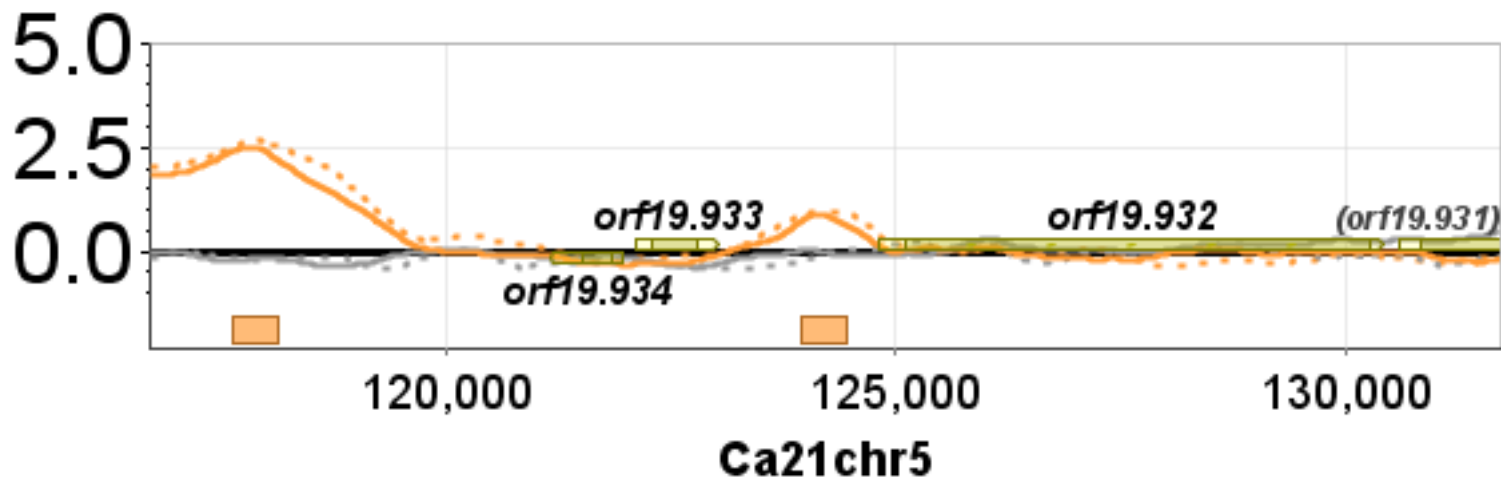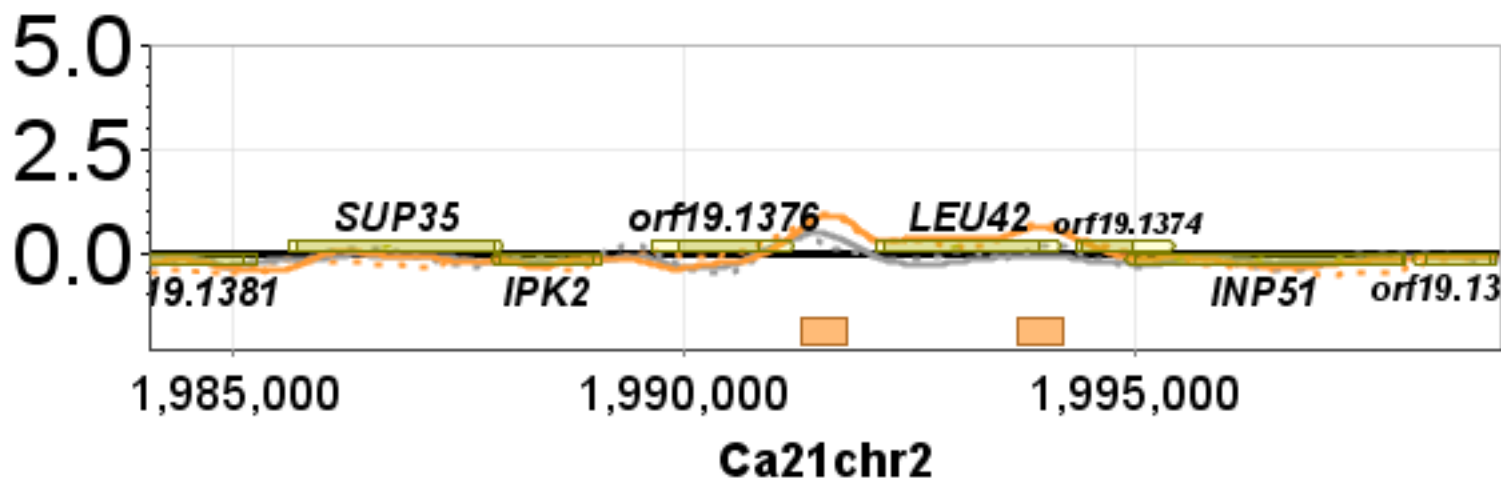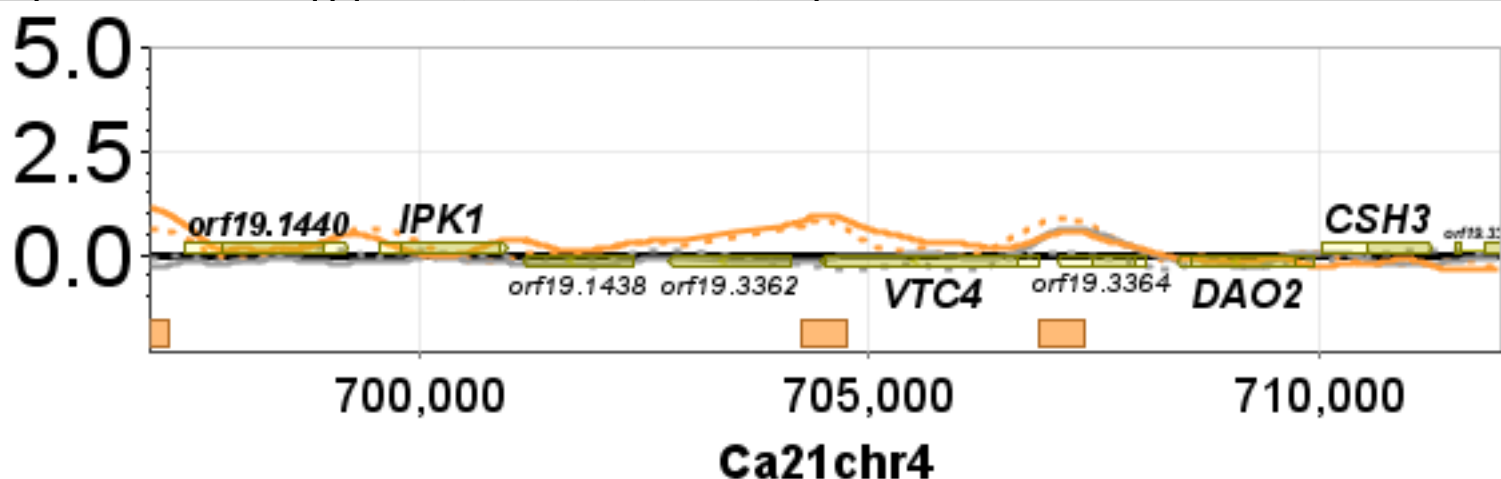

[0.955] Ca21chr1:1389469-1404468 [+] [orf19.6259, GLT1, orf19.6260, BPH1]

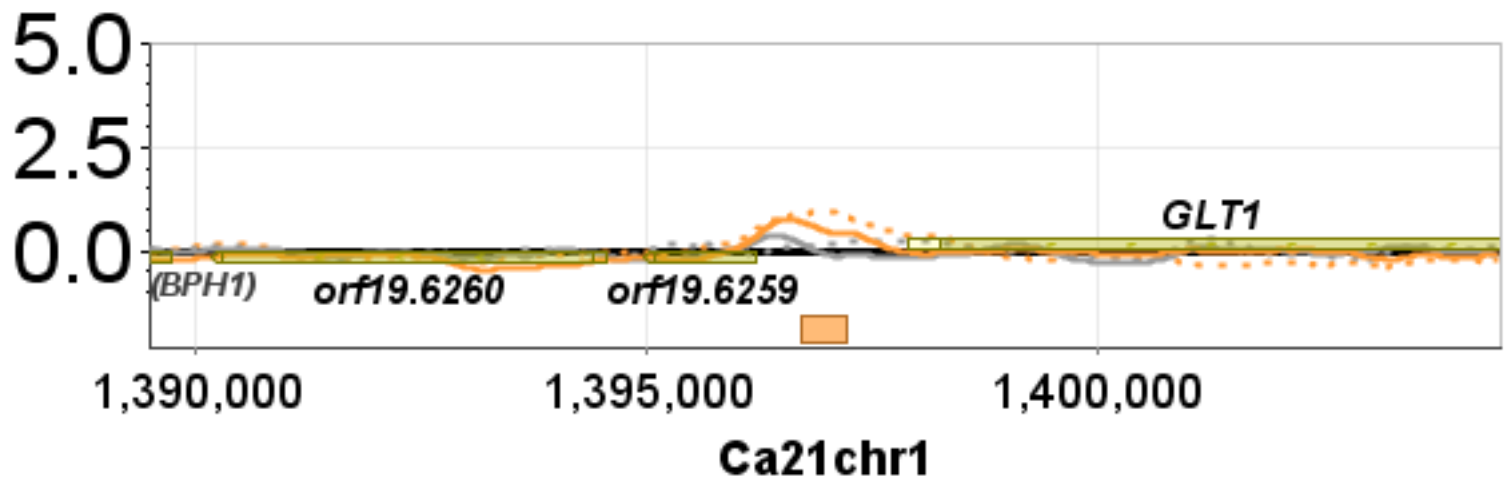

[0.952] Ca21chr1:3065758-3080757 [+] [Intar\_277, SIM1, orf19.5033, orf19.5034, SSK1]

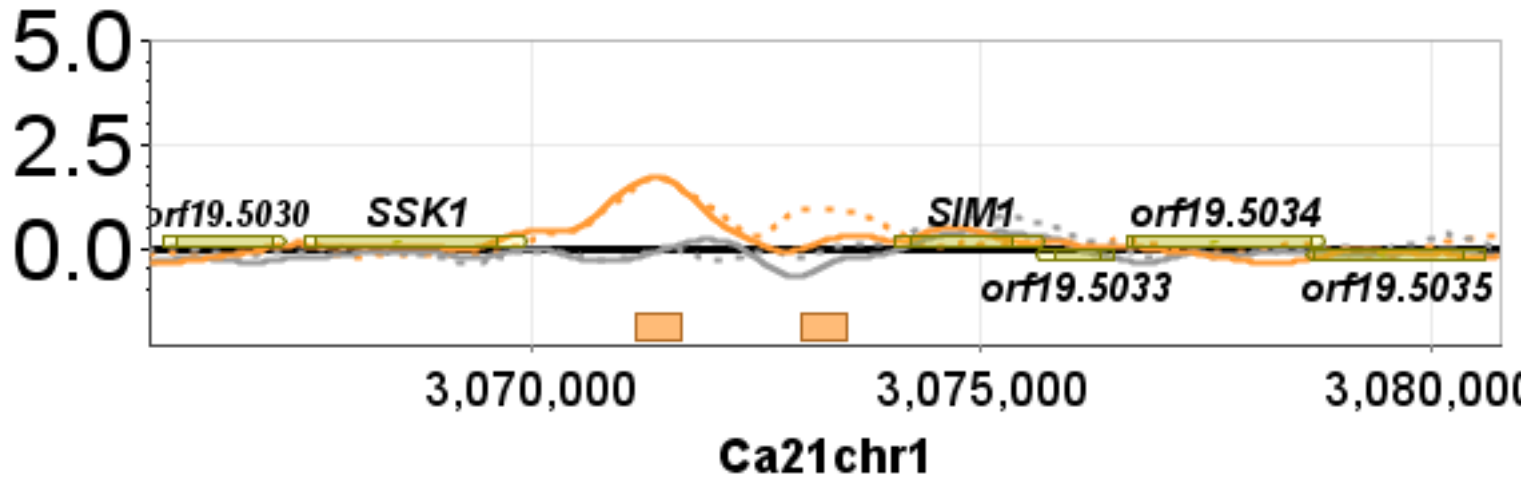

[0.952] Ca21chrR:1364538-1379537 [+] [BCR1, orf19.725, orf19.721, PPZ1]

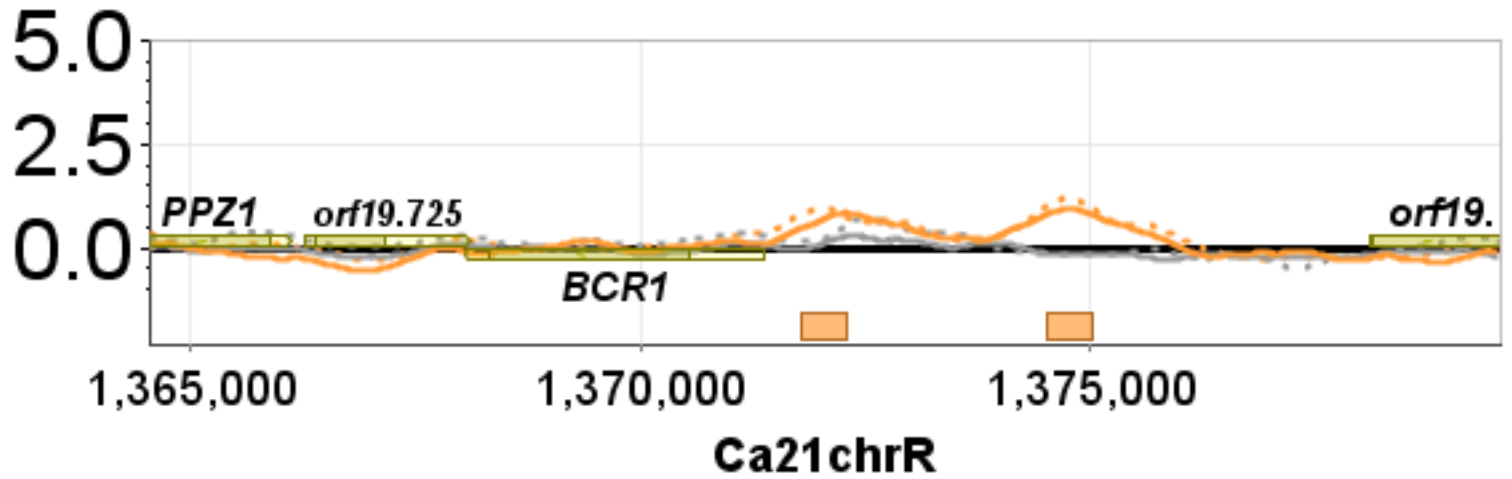

[0.951] Ca21chr2:821334-836333 [+] [SCH9, orf19.828, ntar\_358, RPL39, orf19.827]

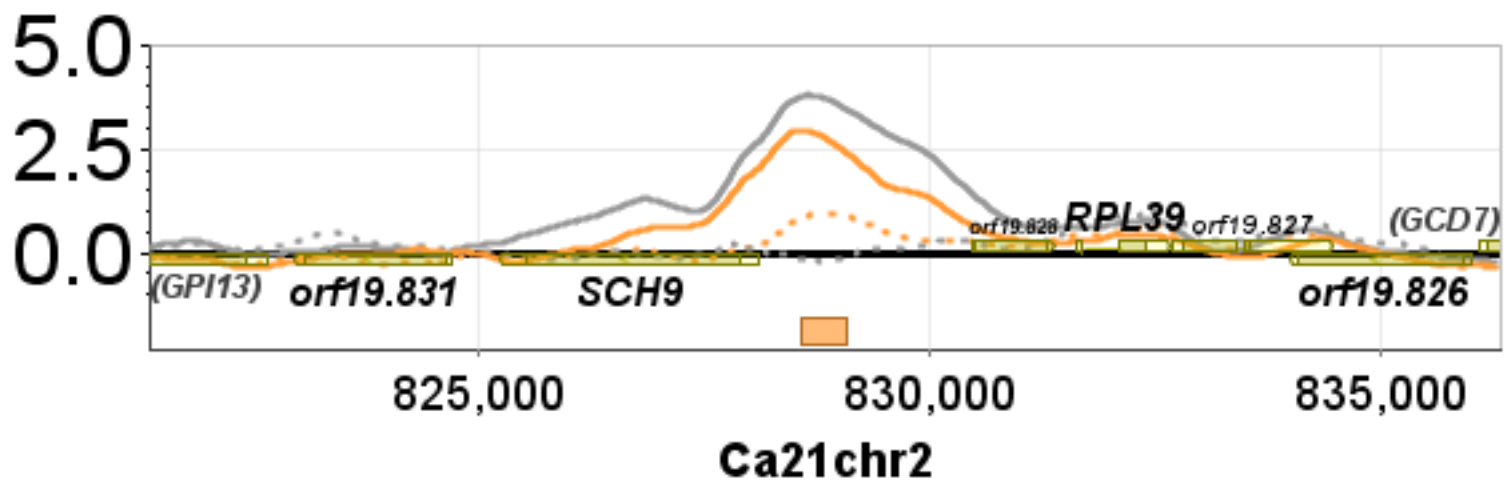



[0.945] Ca21chr4:434095-449094 [+] [ZCF25, orf19.4567, orf19.4566, orf19.4569, orf19.4570]

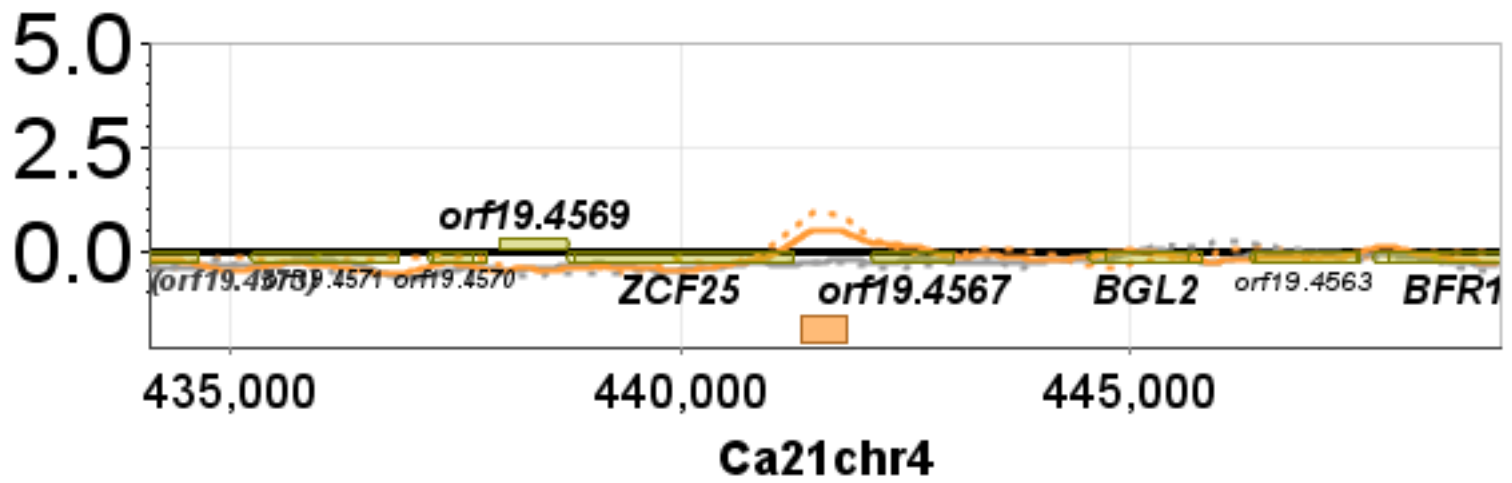

[0.941] Ca21chr2:1002757-1017756 [+] [ntar\_381, ntar\_382, orf19.4128, ntar\_383, orf19.182]

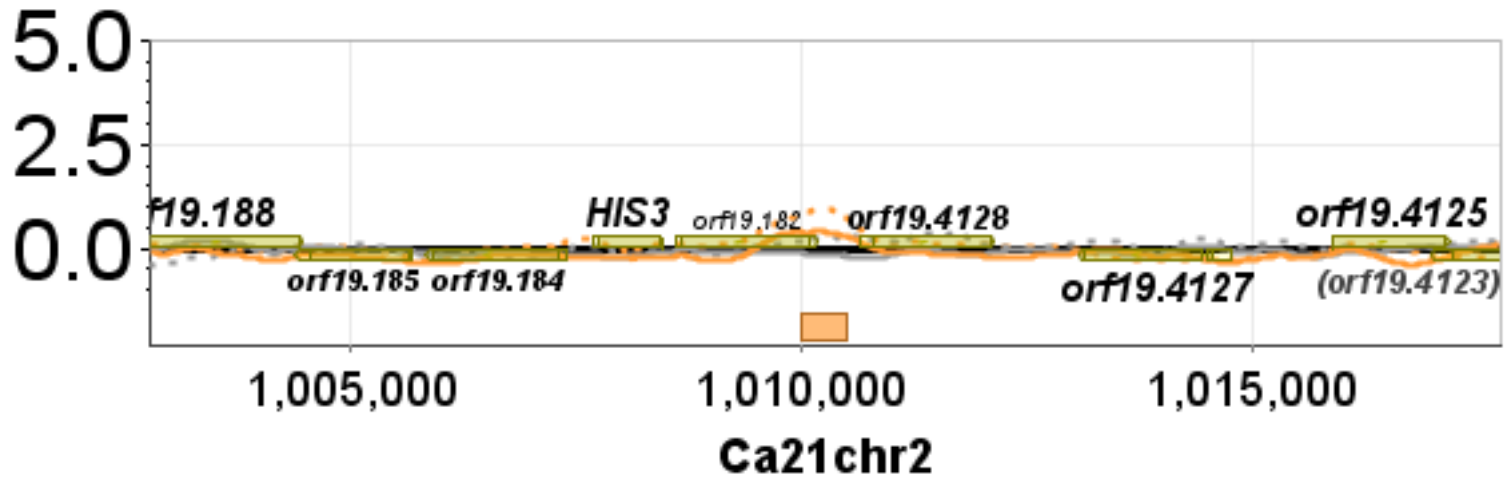

[0.94] Ca21chr4:1417967-1432966 [+] [orf19.2892, orf19.2893, VMA8, orf19.2891, SOU1]

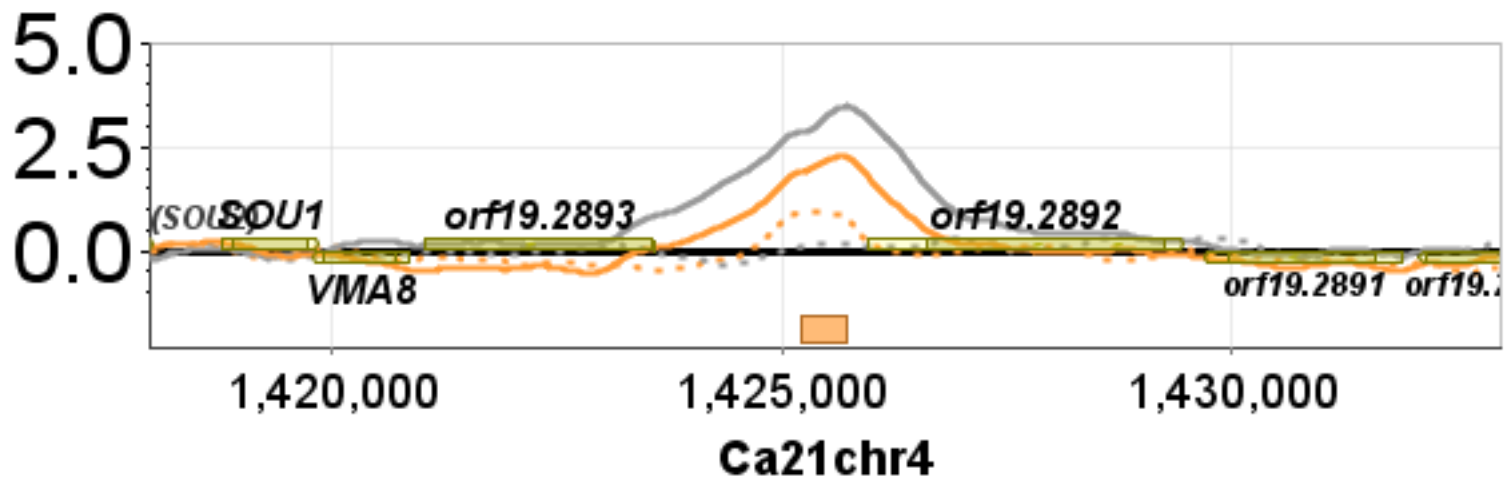

[0.939] Ca21chr1:1838762-1853761 [+] [orf19.384, GCV2, TEF2, ntar\_173, SAM4]

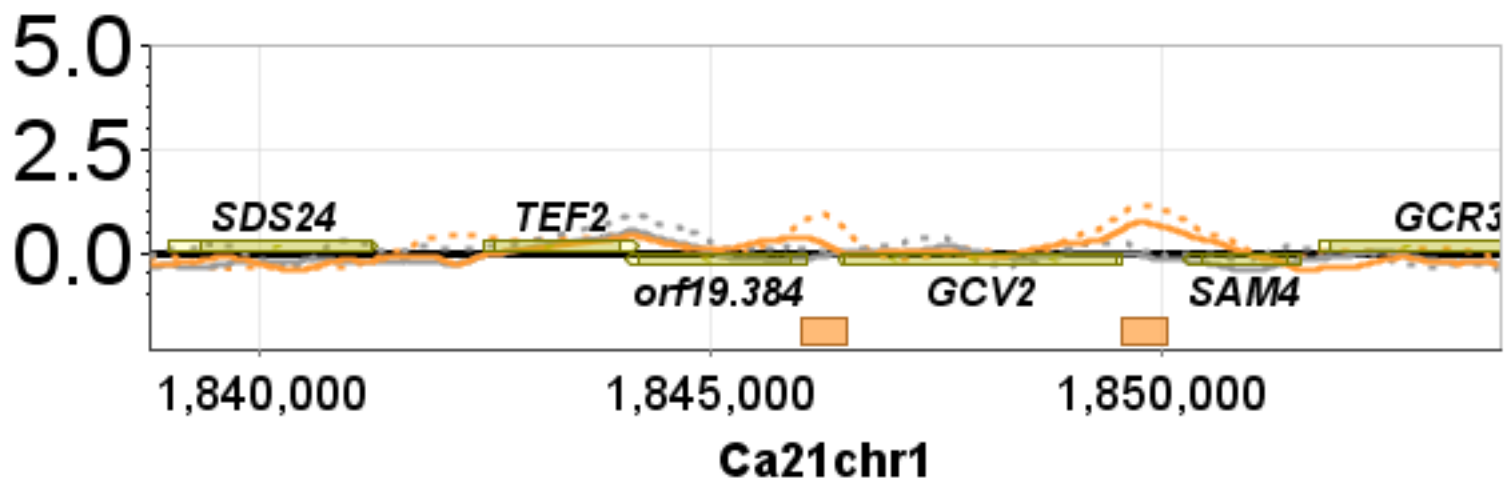

[0.938] Ca21chr5:867817-882816 [+] [ntar\_934, orf19.3213, orf19.3214, ntar\_933, orf19.3215]

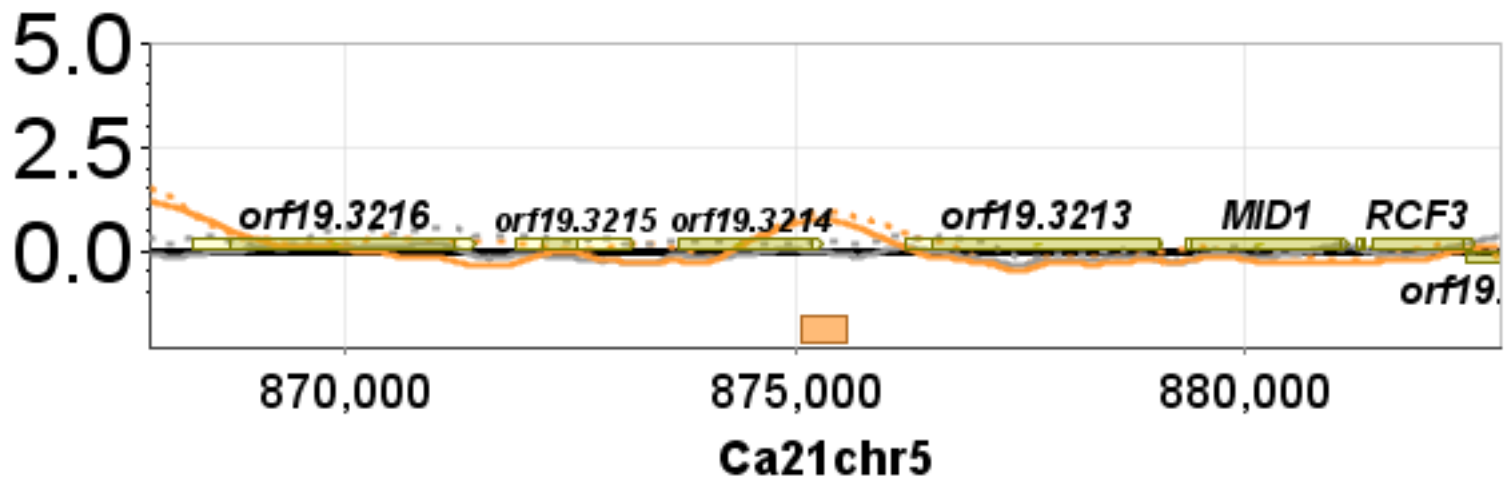

[0.926] Ca21chr1:1019425-1034424 [+] [ntar\_99, orf19.750, orf19.751, ntar\_98, orf19.752]

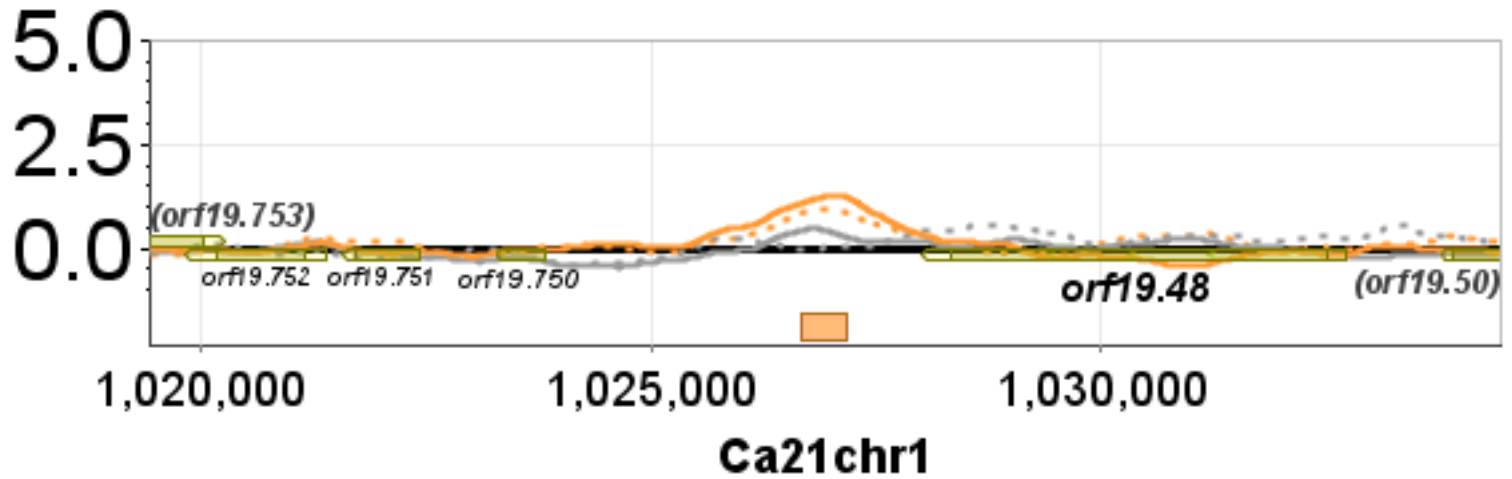

[0.924] Ca21chr3:1296290-1311289 [+] [SKN1, ntar\_644, KRE6, orf19.7361, orf19.7360]

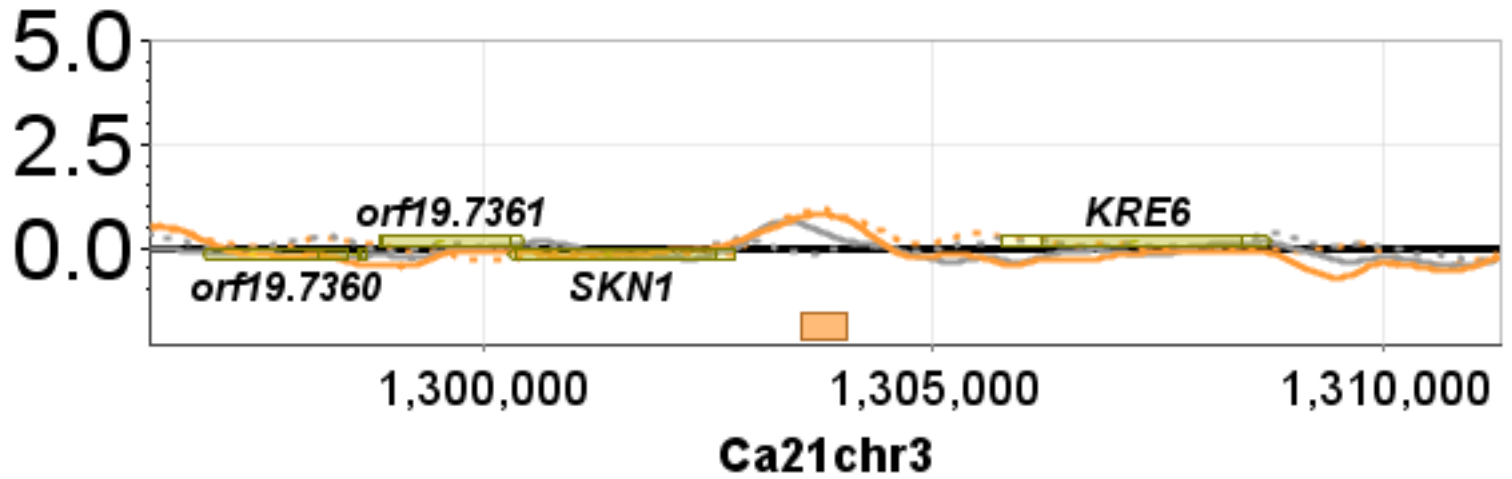

[0.923] Ca21chr3:1597776-1612775 [+] [POS5, SSN6, RPD31, orf19.6802, HUT1]

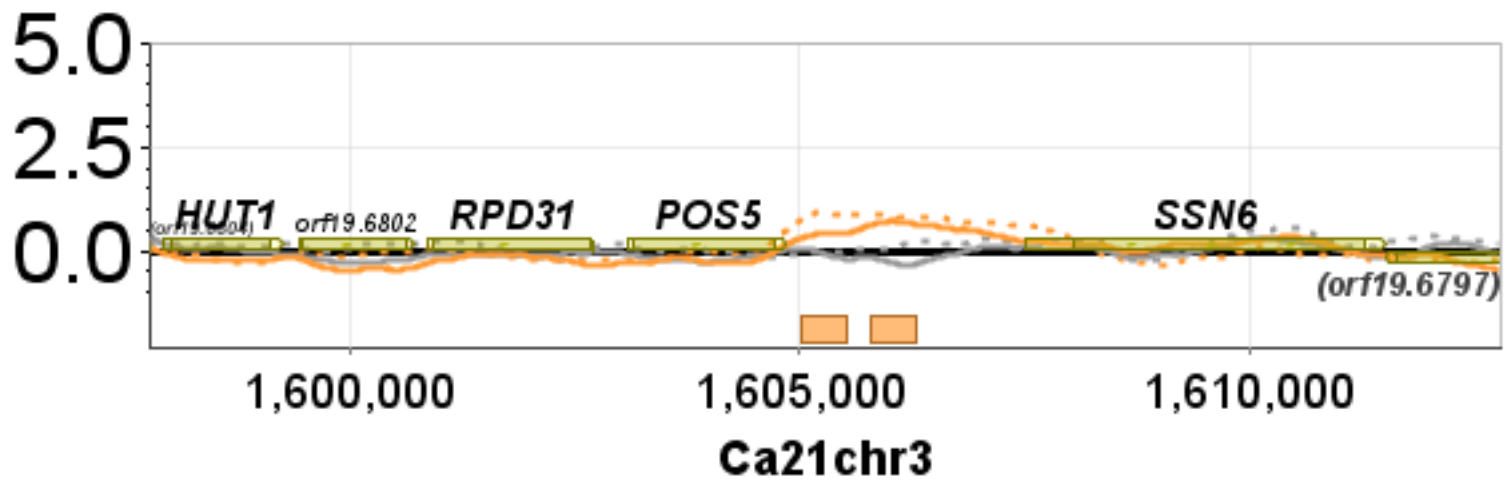

[0.923] Ca21chr6:49306-64305 [+] [GNP1, DNA2, orf19.1195, orf19.1196, orf19.1198]

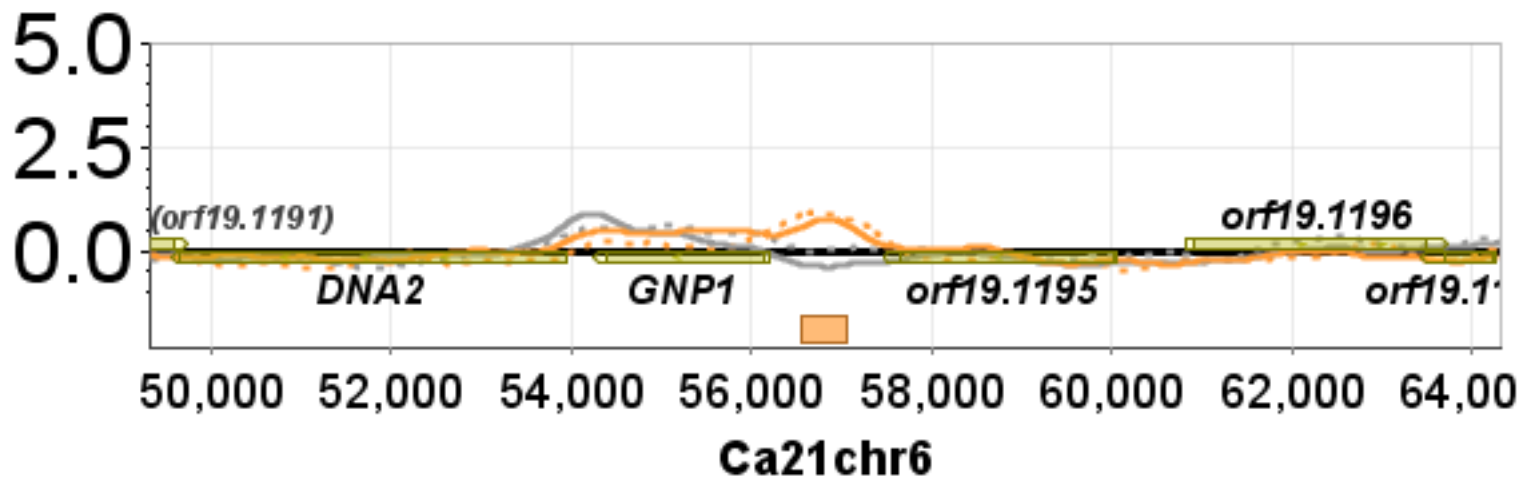

[0.917] Ca21chr1:562599-577598 [+] [orf19.2961, orf19.2962, FRS2, ntar\_60, orf19.2959.1]

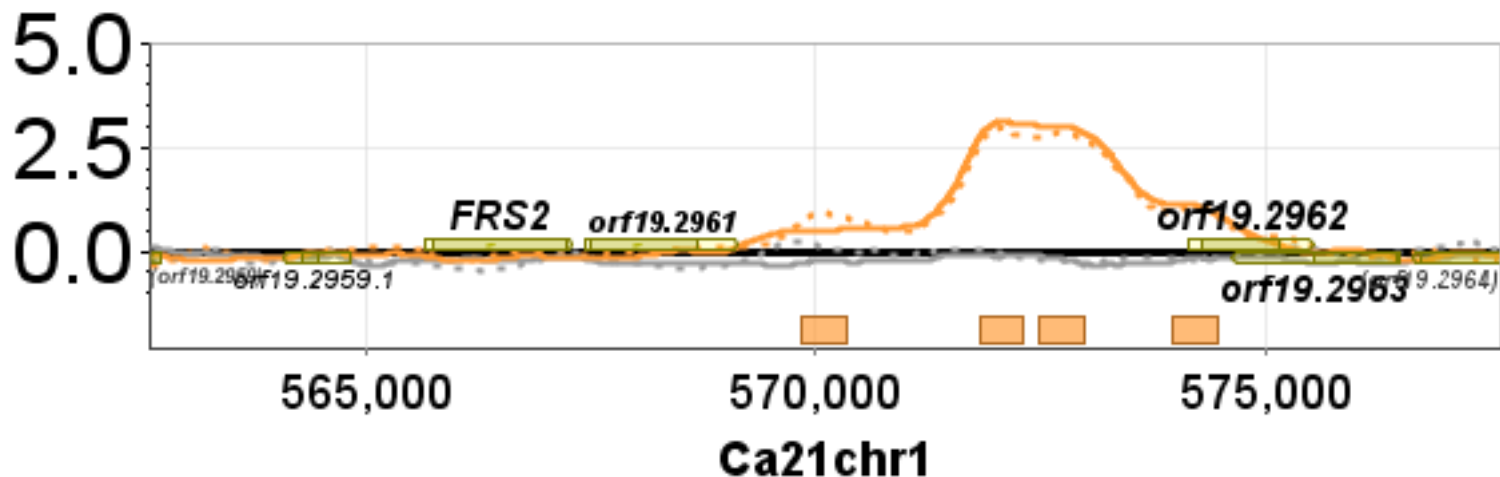

[0.917] Ca21chrR:837923-852922 [+] [KRE1, orf19.4376, orf19.4378, PRP13, ntar\_1252]

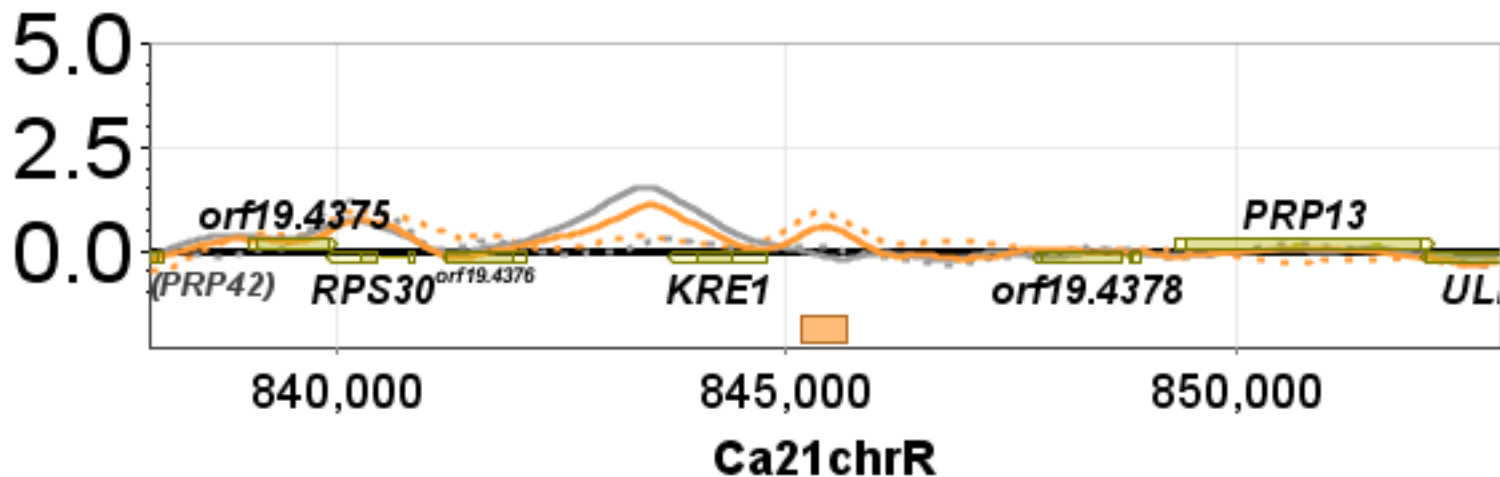

[0.916] Ca21chr3:1050513-1065512 [+] [orf19.5960, ntar\_608, ntar\_607, orf19.5961, SNF3]

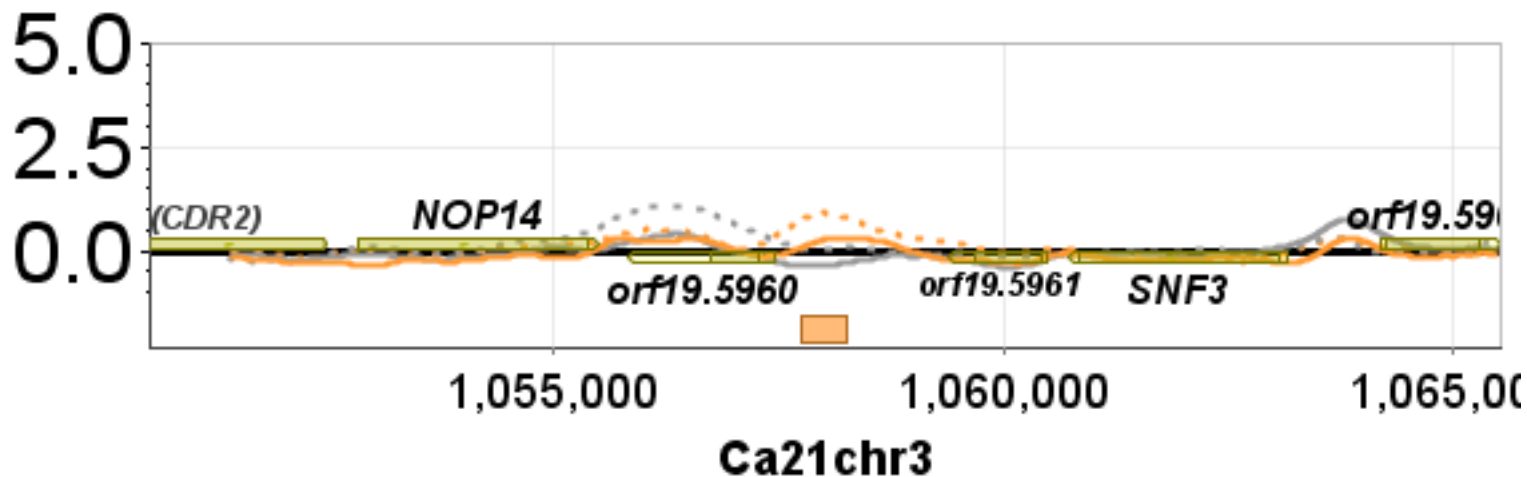

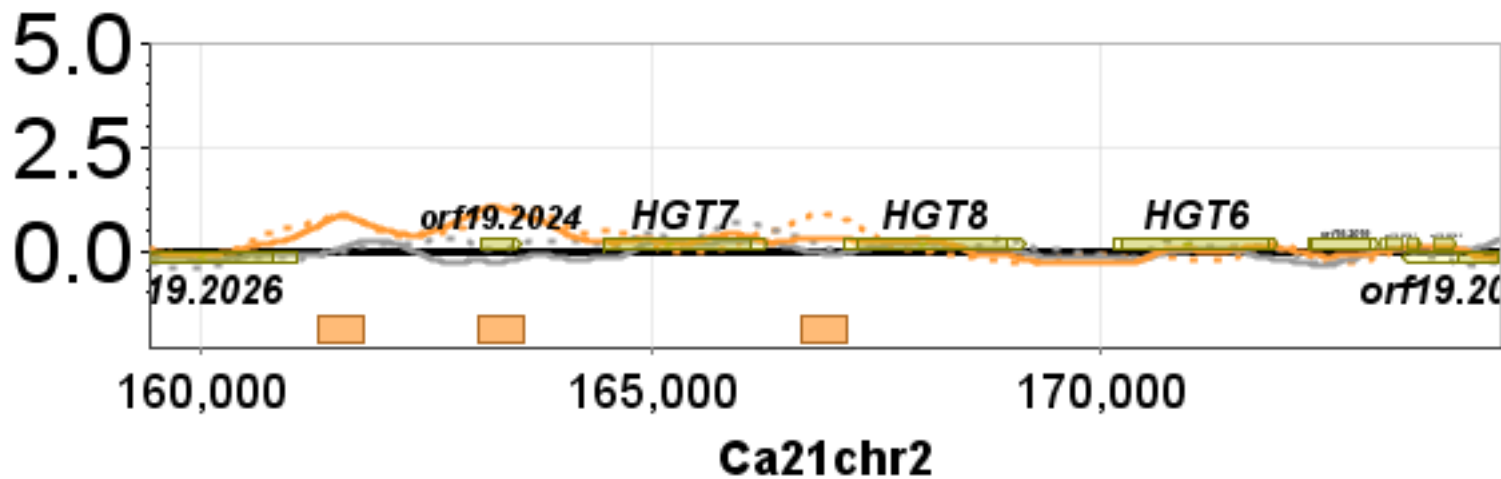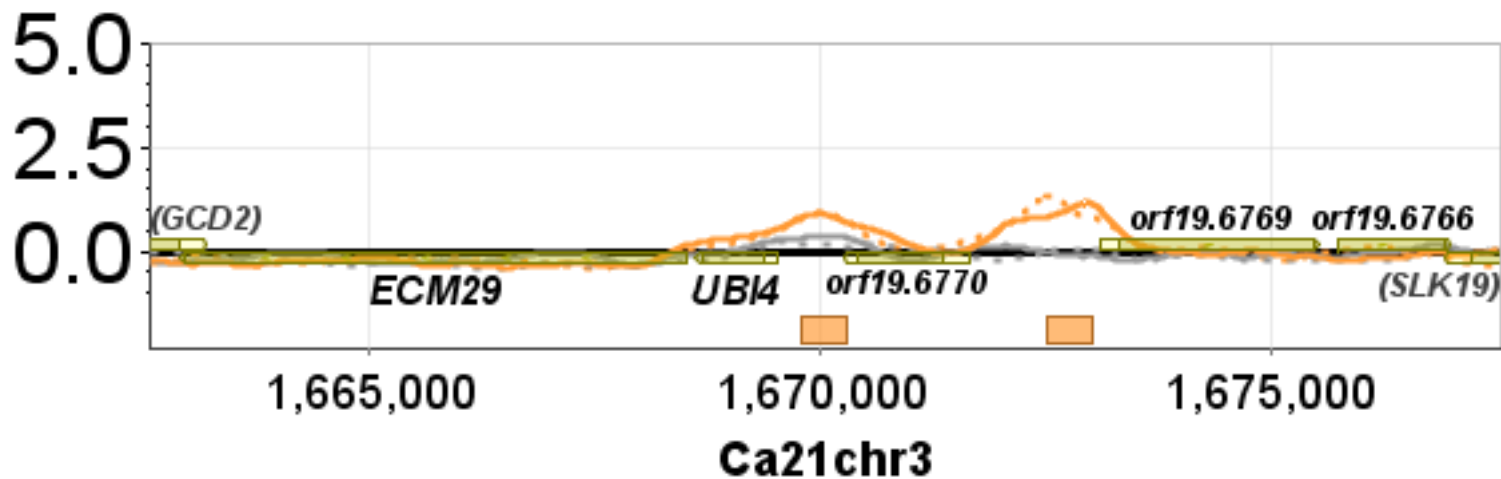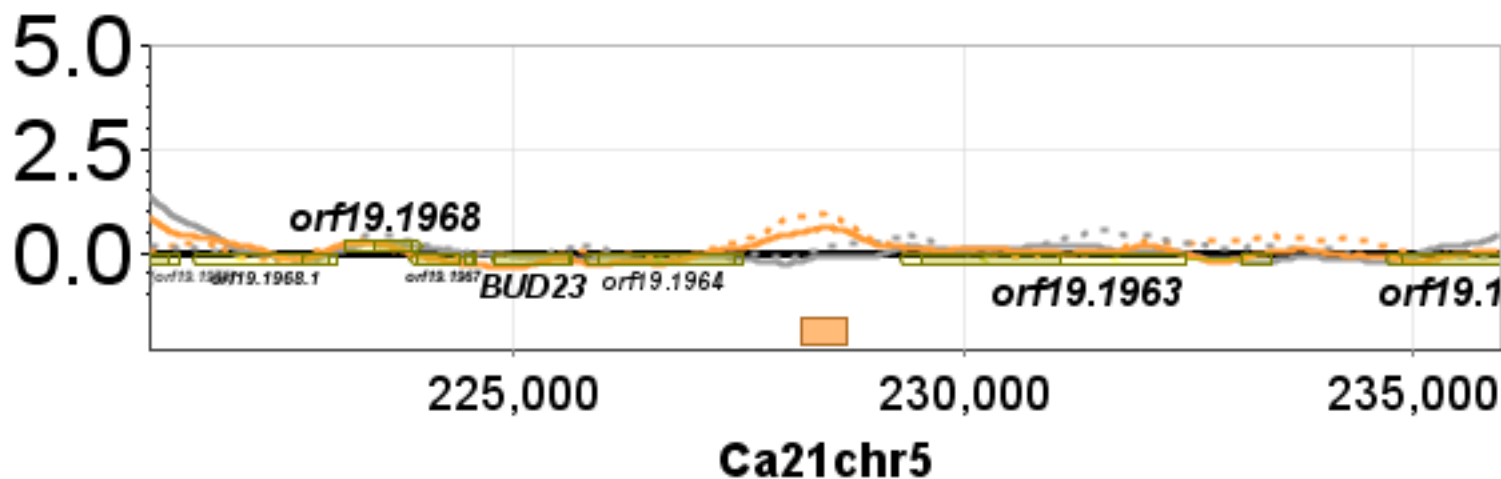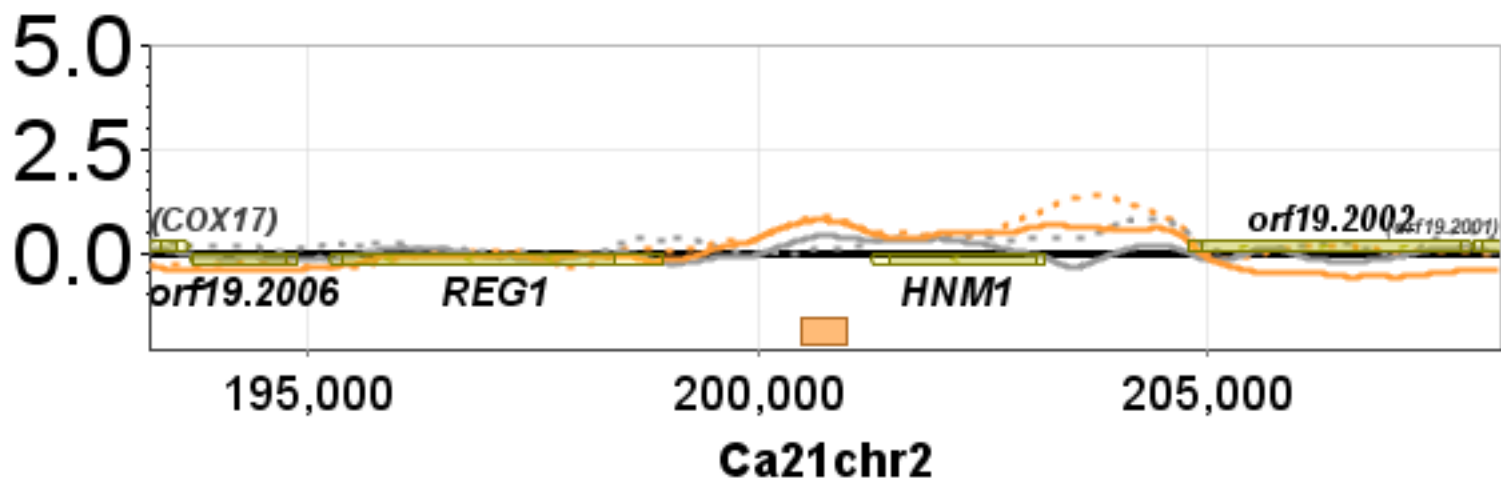

[0.903] Ca21chr7:272285-287284 [+] [orf19.6919, orf19.6918, orf19.6917, ntar\_1080, orf19.6916]

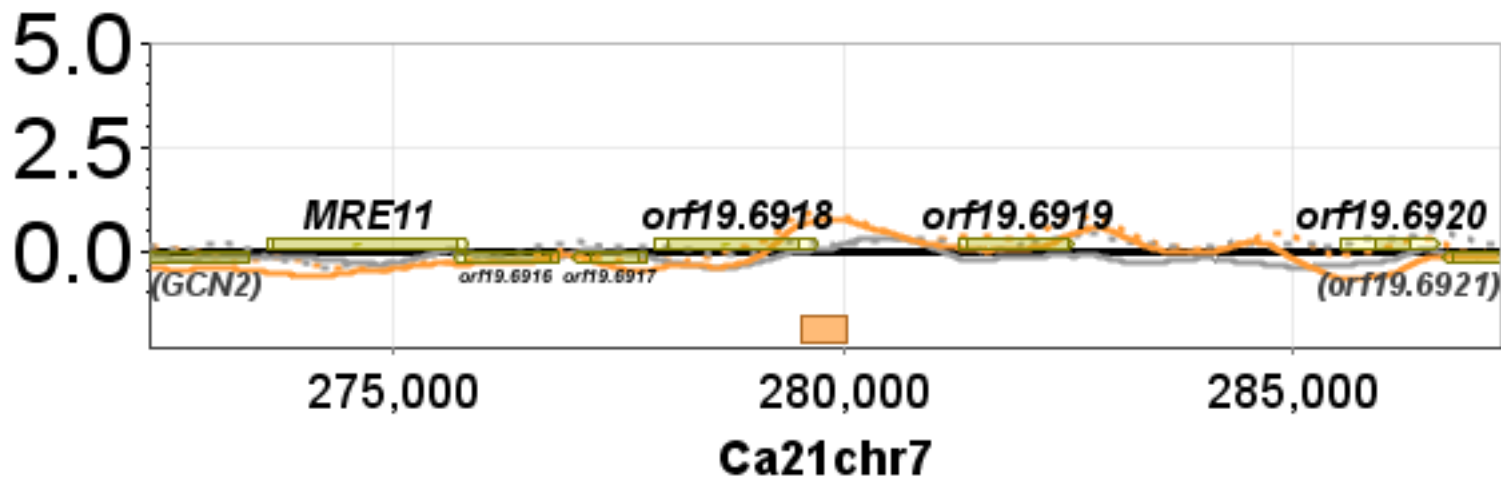

[0.903] Ca21chr7:916270-931269 [+] [orf19.7149, ntar\_1154, TPO2, NRG1, ntar\_1155]

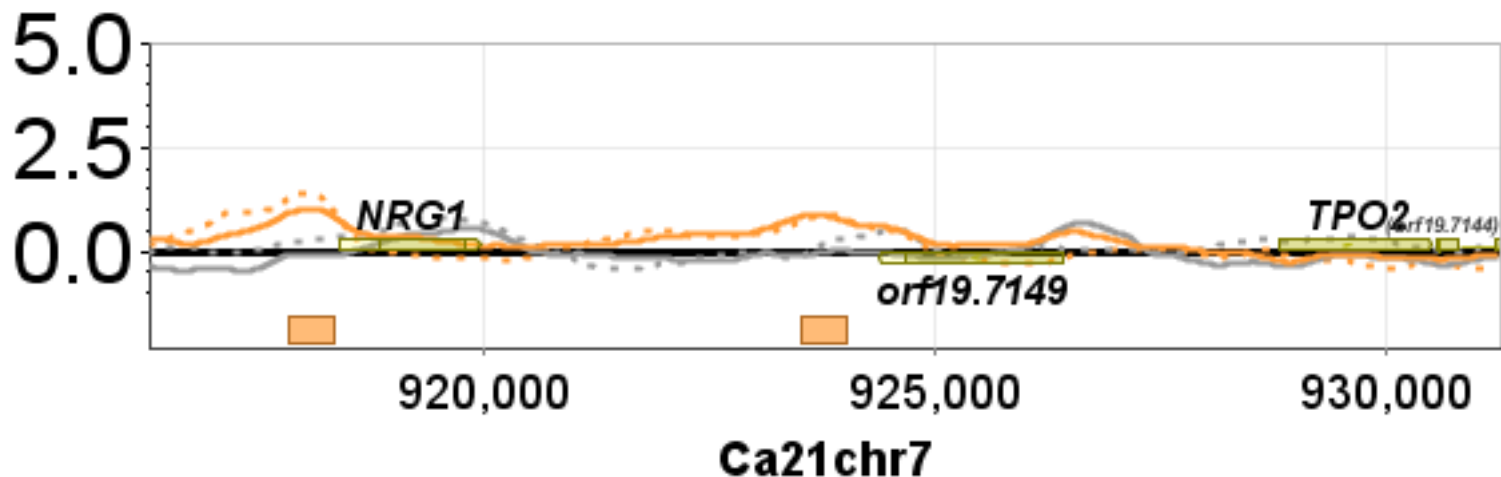

[0.901] Ca21chr1:2249976-2264975 [+] [TPK1, ntar\_208, CLA4, orf19.4893, orf19.4894]

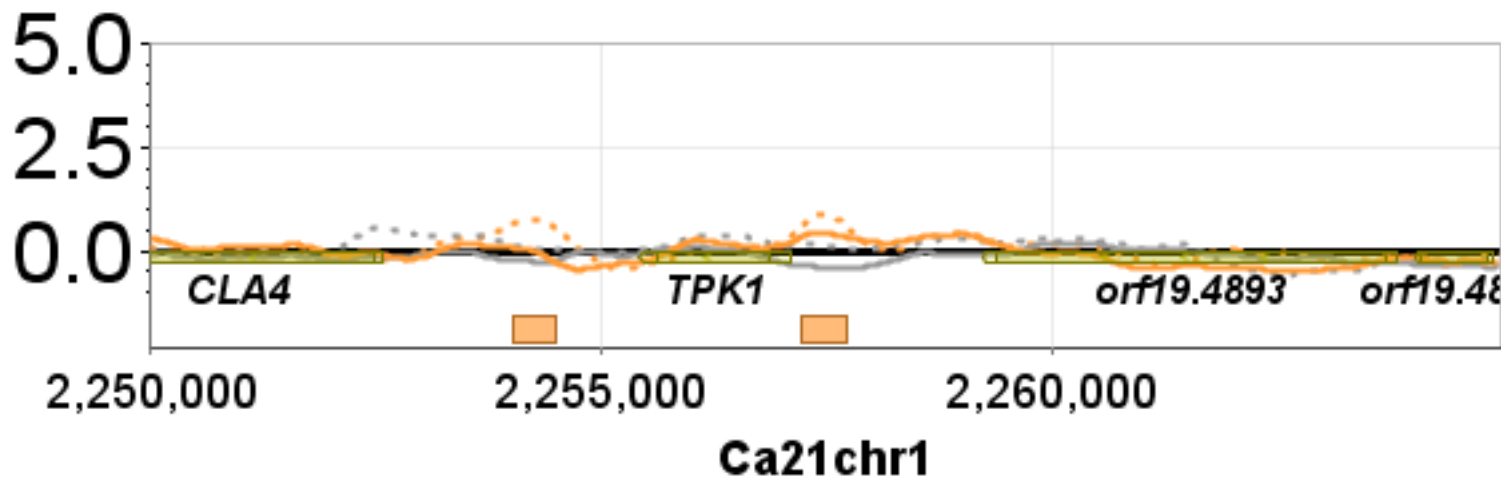

[0.901] Ca21chr2:623074-638073 [+] [orf19.5784, orf19.5785, orf19.5783, ntar\_341, orf19.5782]

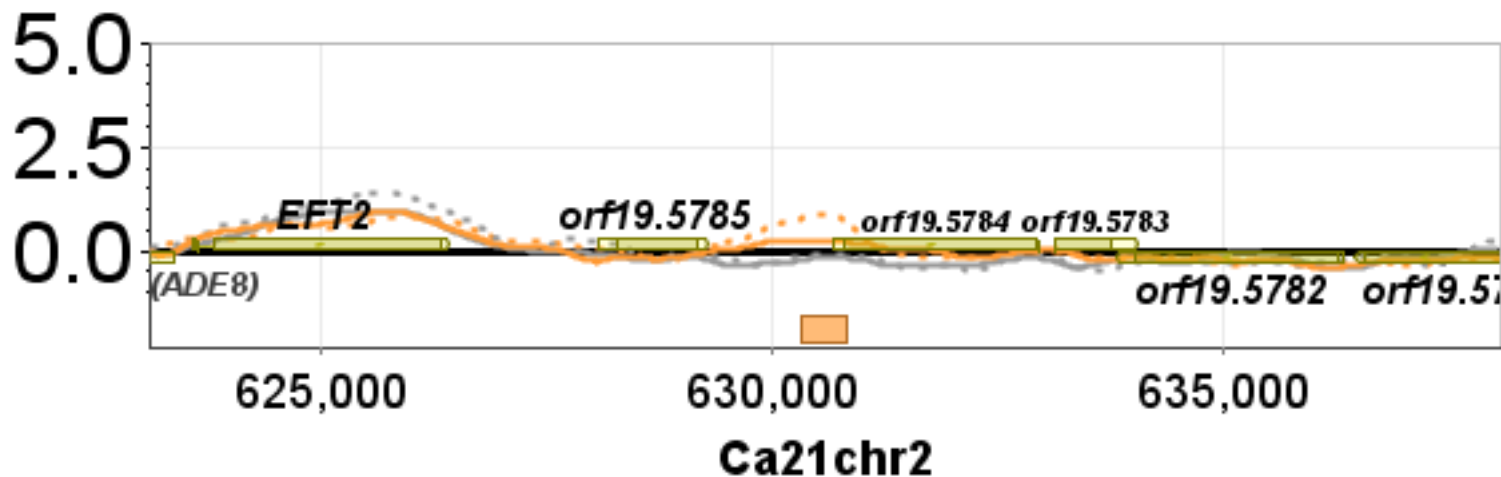

[0.9] Ca21chr2:122421-137420 [+] [orf19.2049, orf19.2050, orf19.2048, orf19.2047, orf19.2051]

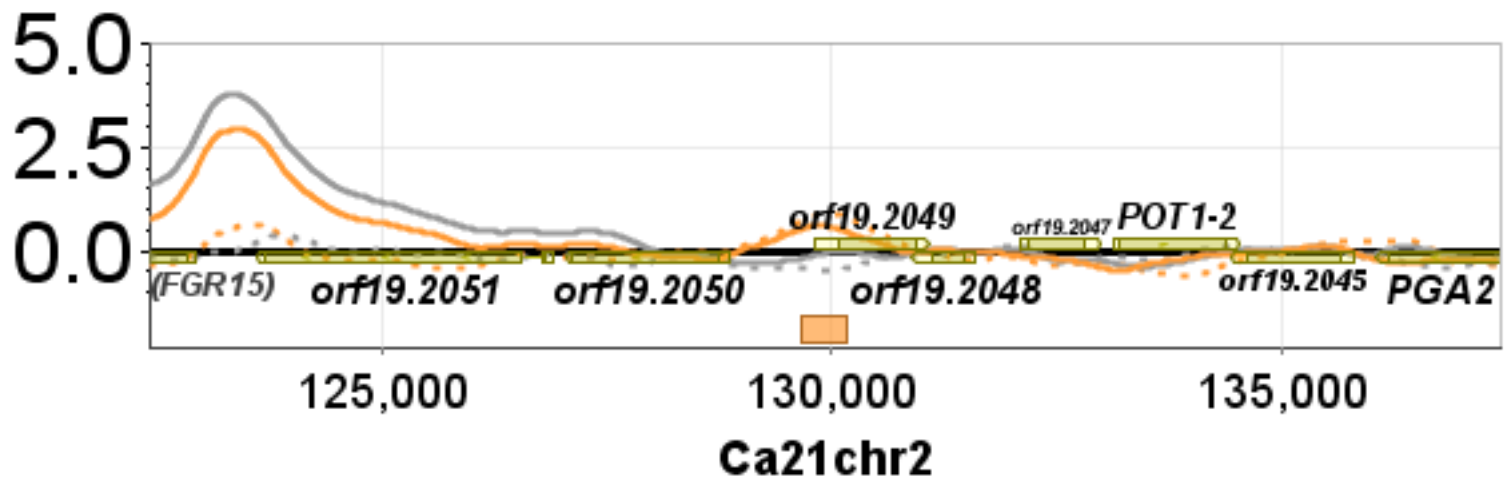

[0.9] Ca21chr5:268577-283576 [+] [AUR1, orf19.1946, orf19.1948, ntar\_869, GPR1]

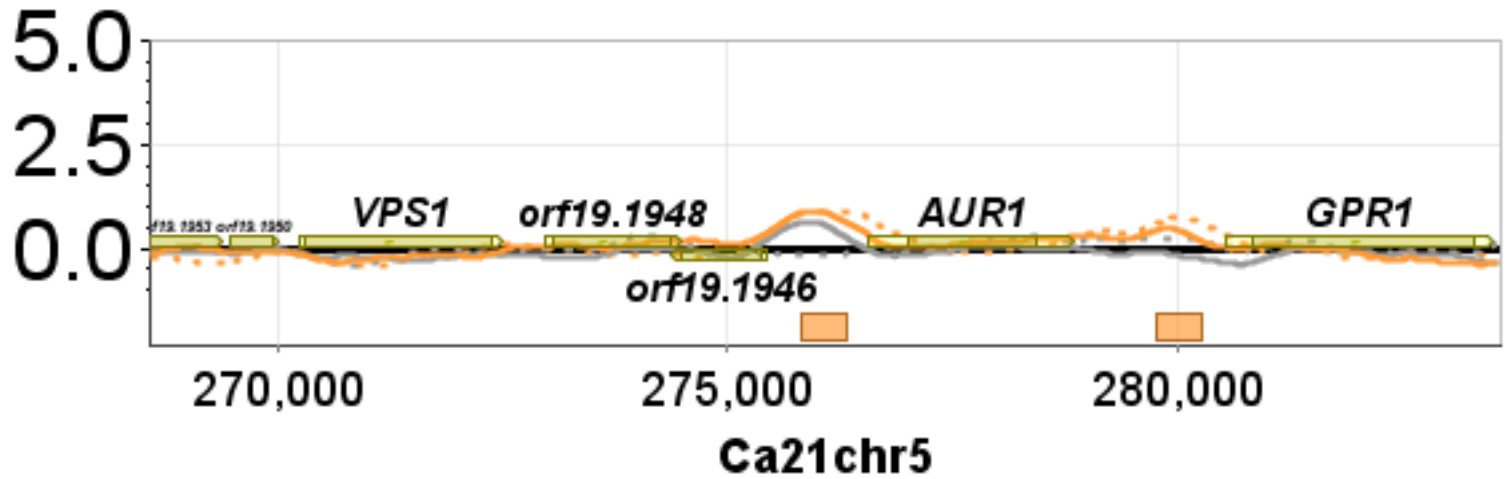

[0.9] Ca21chr7:700560-715559 [+] [PDI1, orf19.5129, orf19.5126, orf19.5131, ntar\_1132]

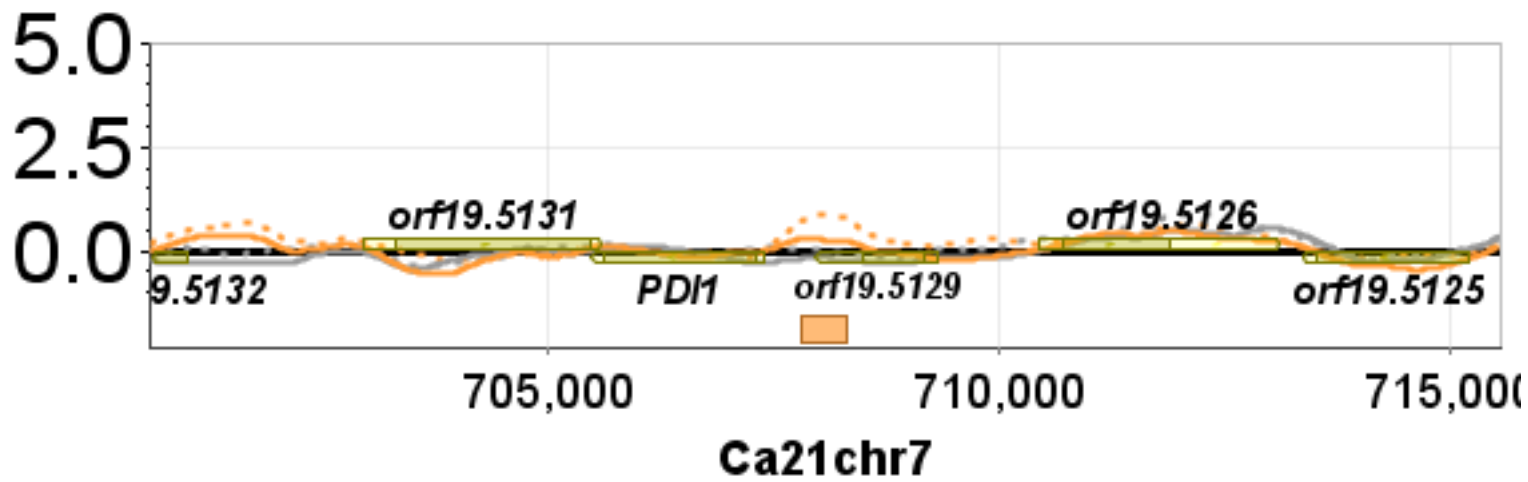

[0.899] Ca21chr4:553337-568336 [+] [orf19.2726, ntar\_769, GRX3, orf19.2728, orf19.2725]

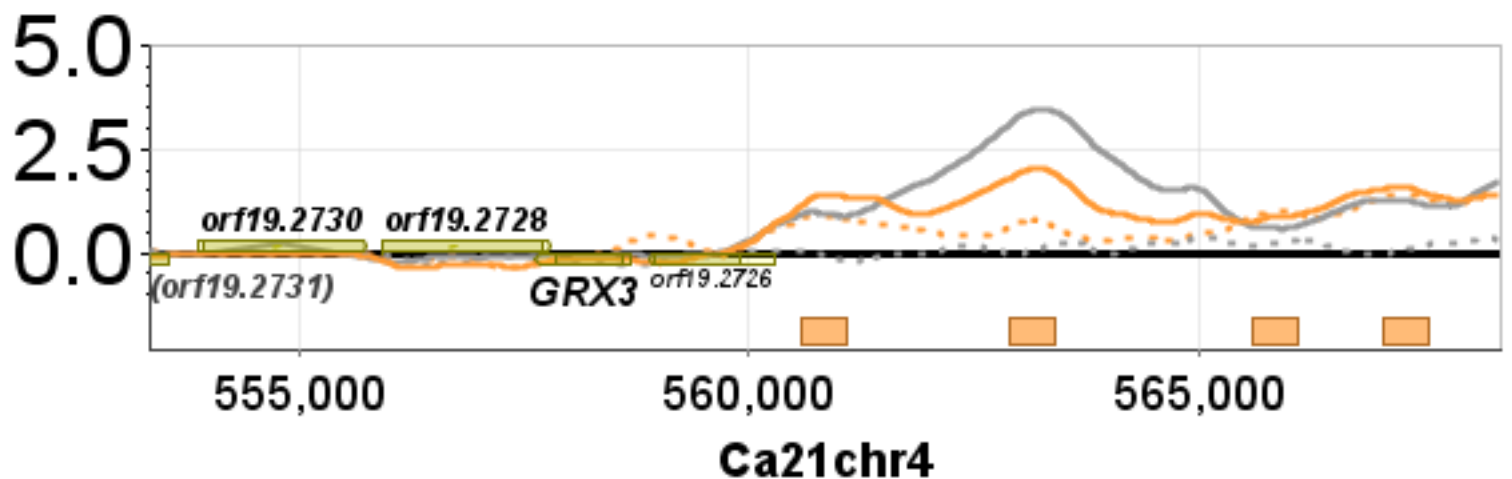

[0.897] Ca21chr2:1995275-2010274 [+] [orf19.1370, orf19.1369, orf19.1371, orf19.1372, INP51]

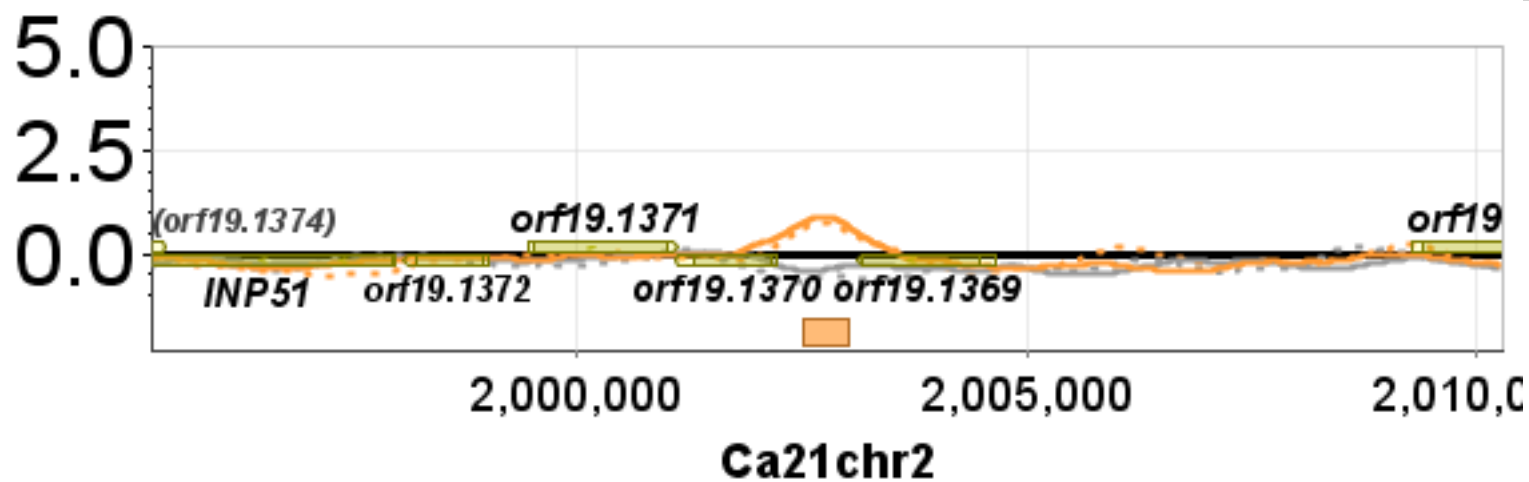

[0.893] Ca21chr7:312424-327423 [+] [FLU1, ntar\_1089, orf19.6575, orf19.6578, ntar\_1088]

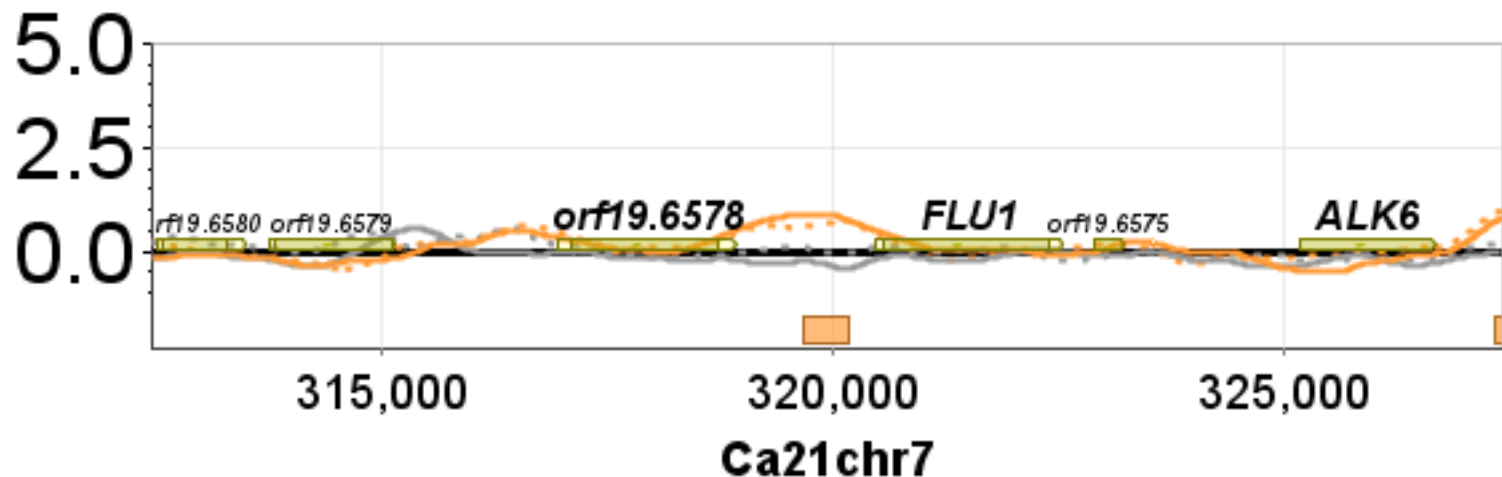

[0.892] Ca21chr6:140602-155601 [+] [orf19.3643, orf19.3644, CTR1, orf19.3647]

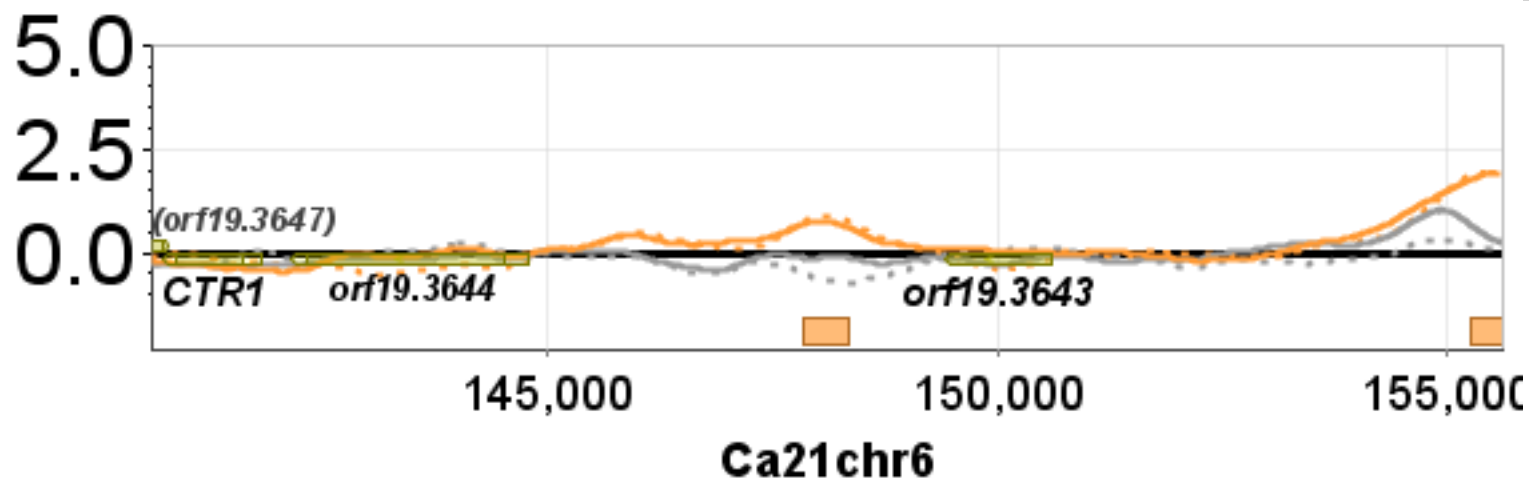

[0.888] Ca21chr5:105413-120412 [+] [AGA1, ntar\_854, orf19.936, orf19.937]

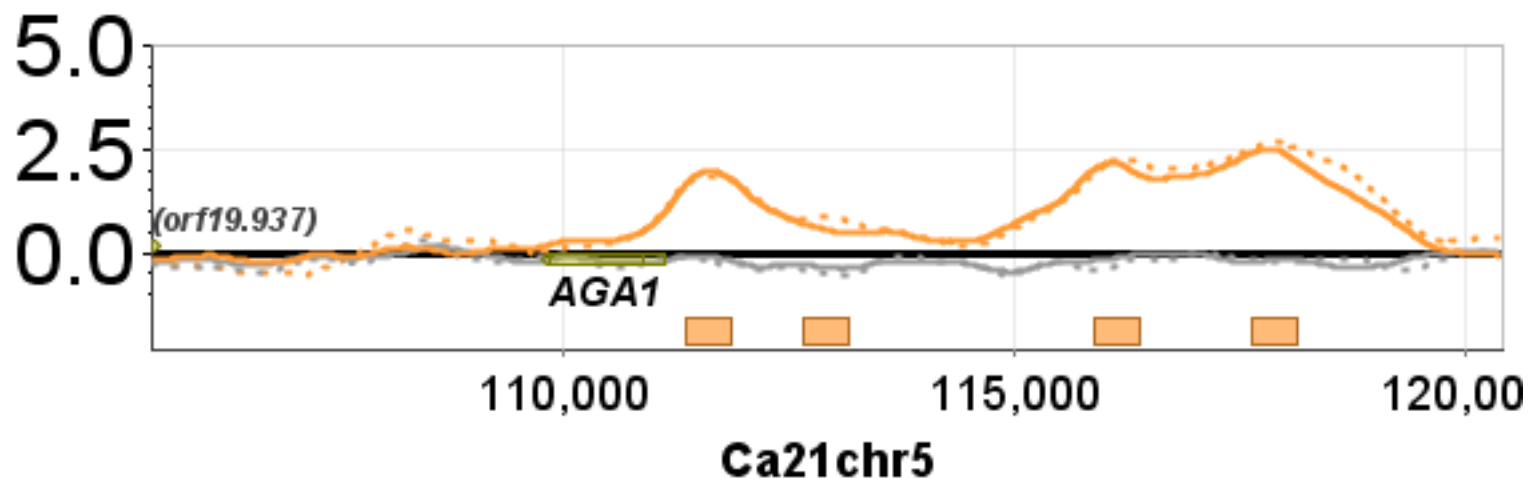

[0.887] Ca21chr1:813952-828951 [+] [orf19.4461, orf19.4463, SEN15, orf19.4459, orf19.4465]

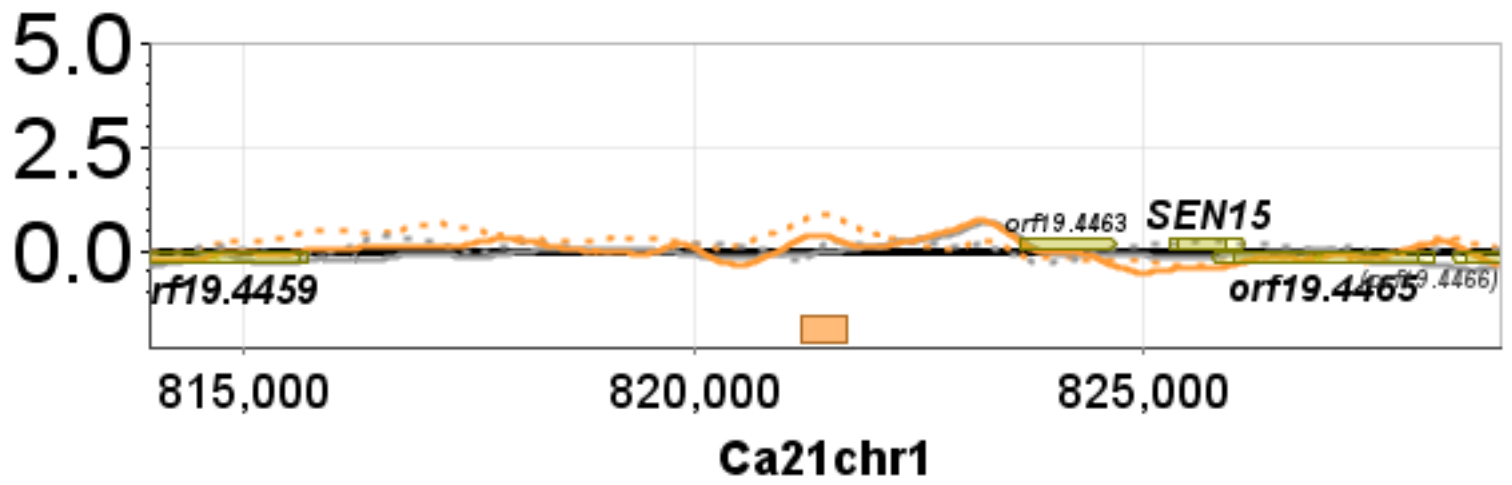

[0.887] Ca21chr6:830458-845457 [+] [Intar\_1033, SNQ2, IHD1, PGA61, ta(uqc)2]

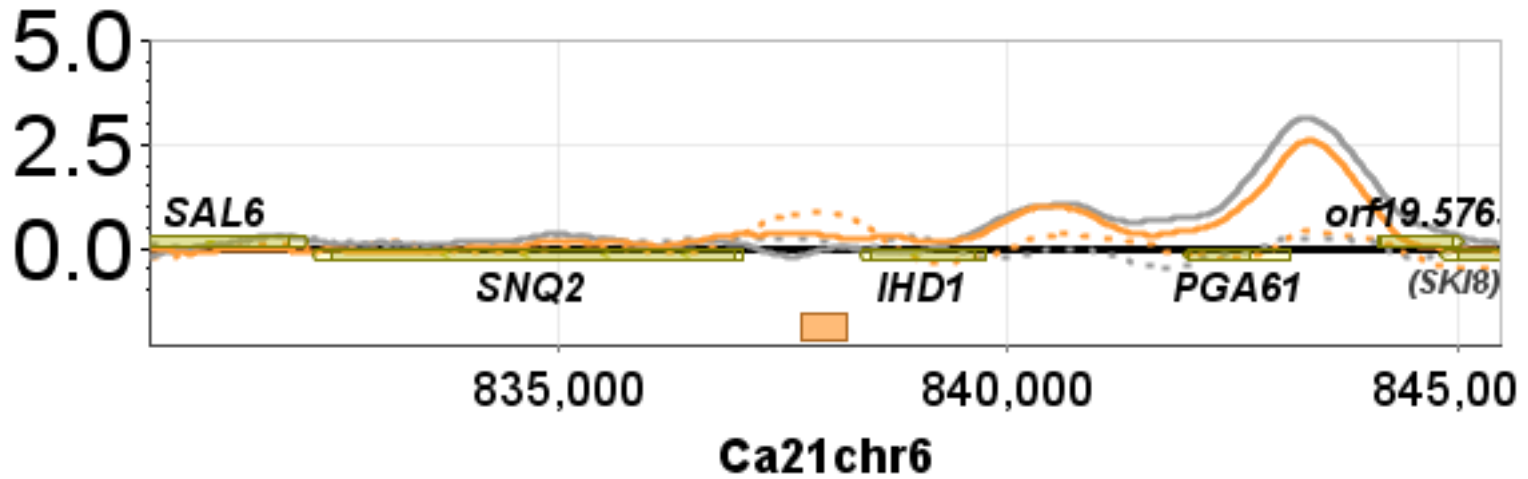

[0.886] Ca21chr6:99427-114426 [+] [orf19.4200, NHX1, orf19.4199, YHM2, orf19.4196]

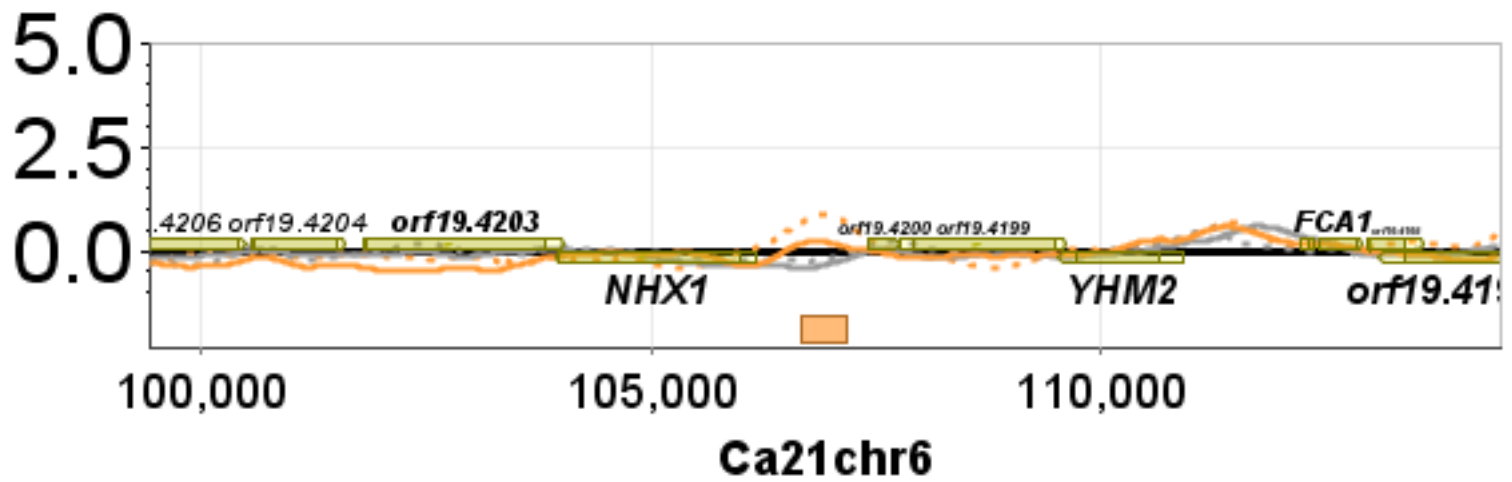

[0.884] Ca21chr3:424900-439899 [+] [POX1-3, ntar\_562, orf19.1651, ntar\_561, orf19.1653]

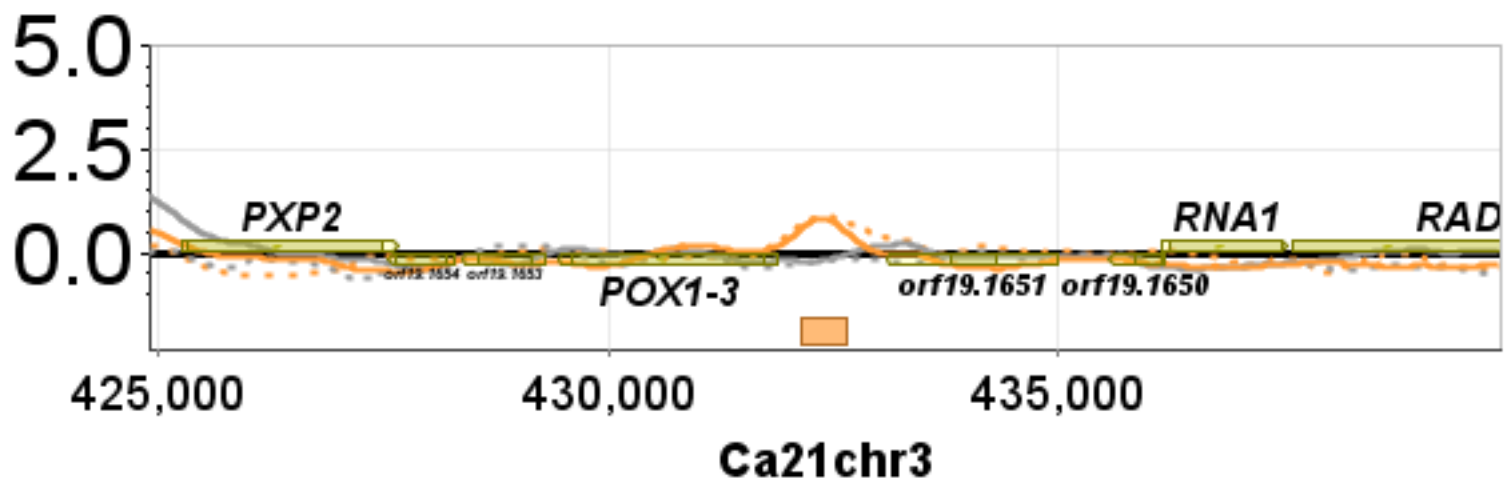



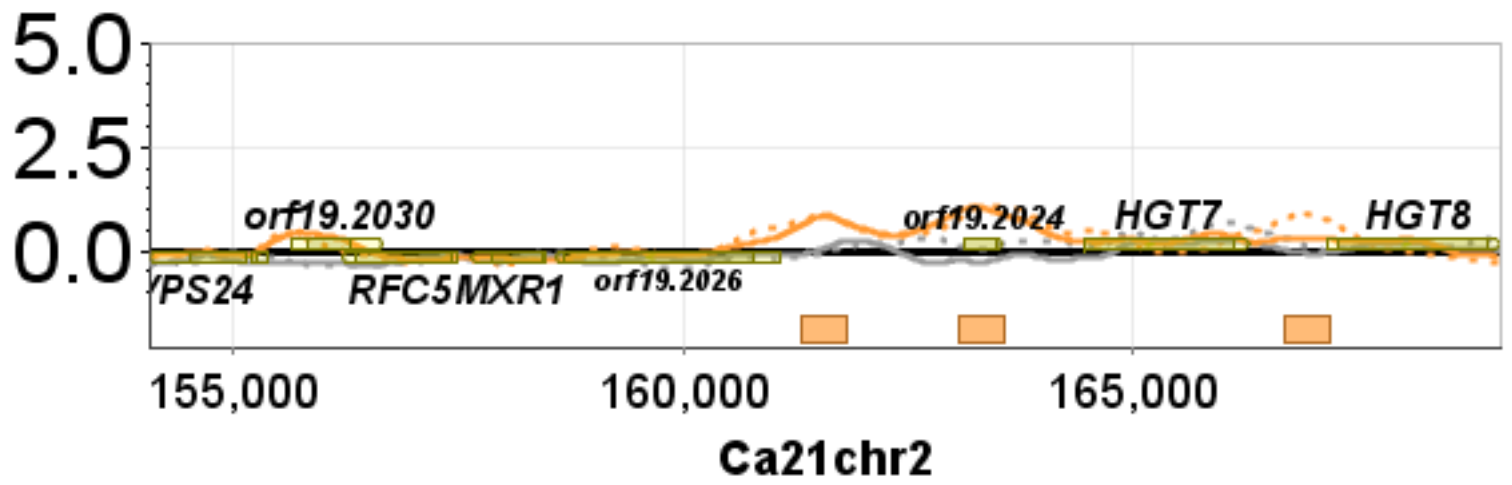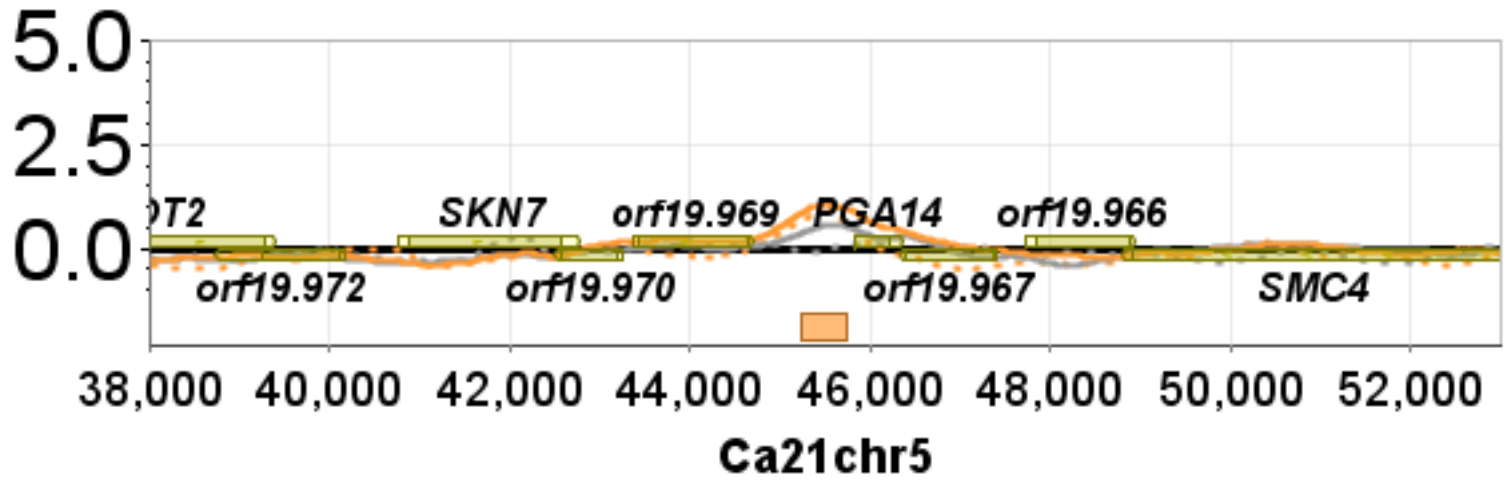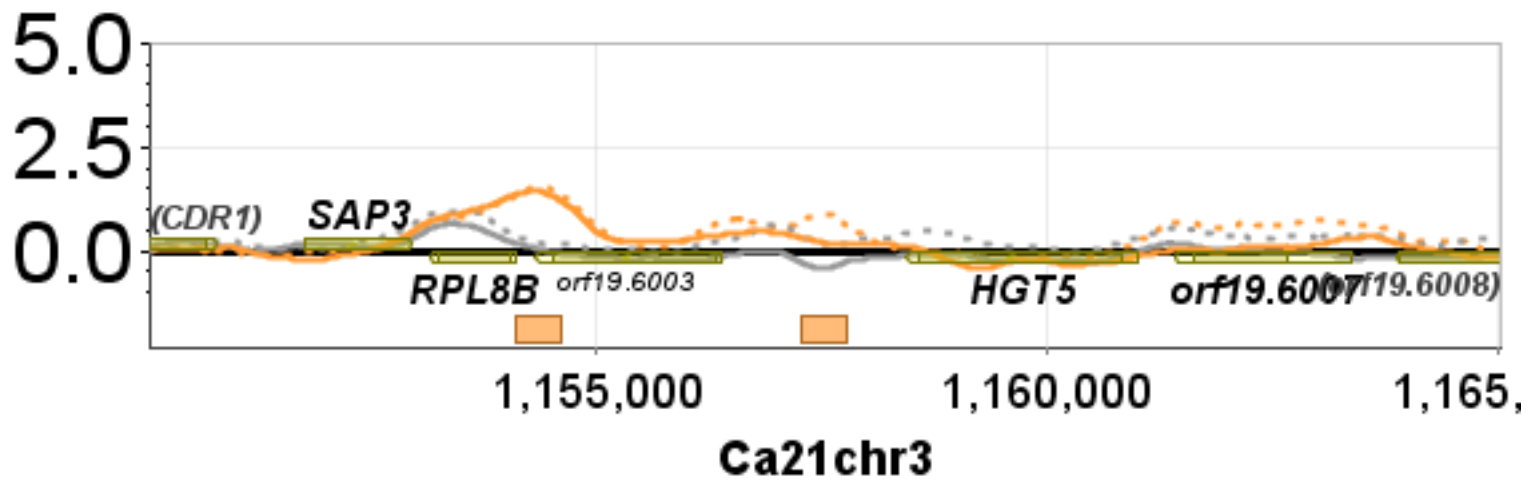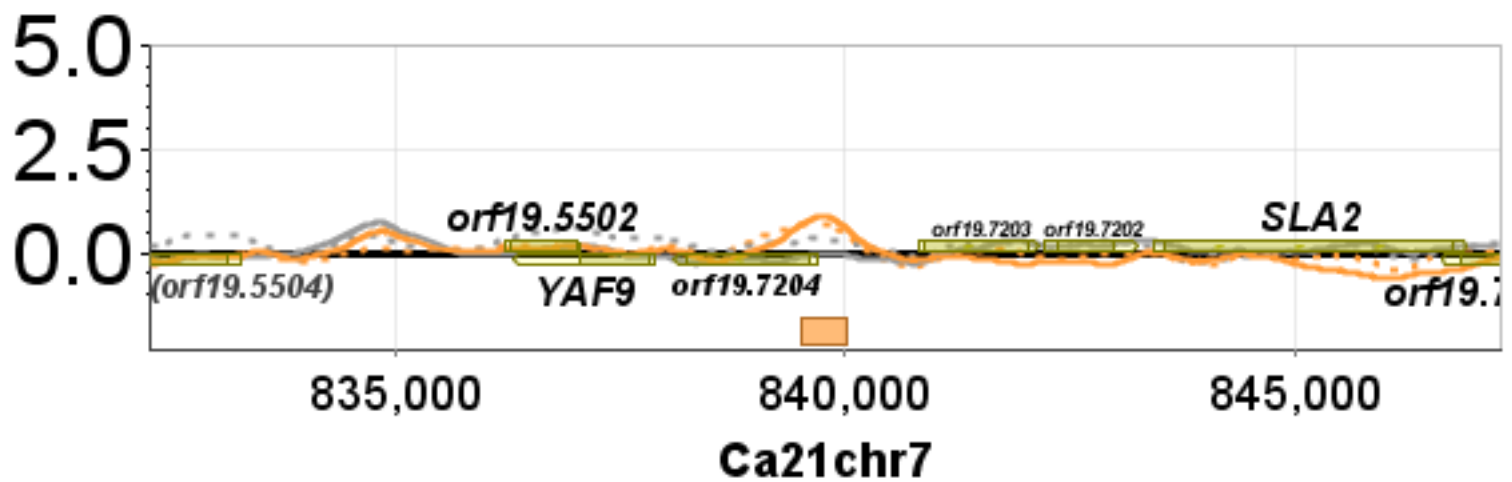

[0.879] Ca21chrR:1282758-1297757 [+] [orf19.3854, CDC28, orf19.3858, orf19.3852, orf19.3859]

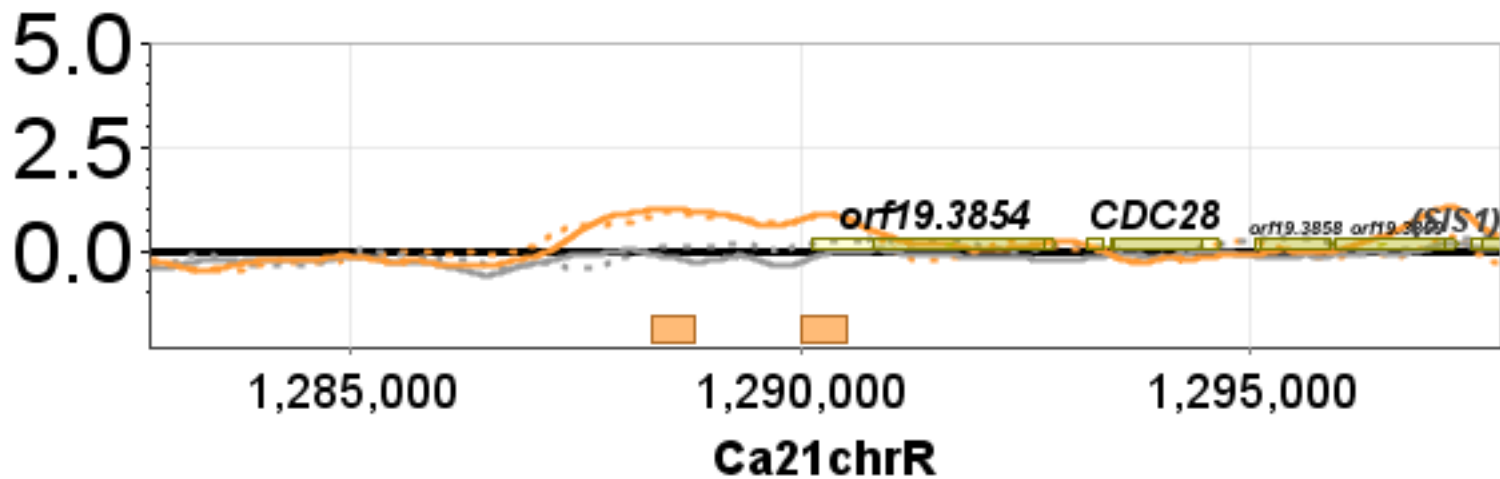

[0.876] Ca21chr6:266206-281205 [+] [ntar\_982, orf19.3447, ntar\_983, orf19.3448, HOC1]

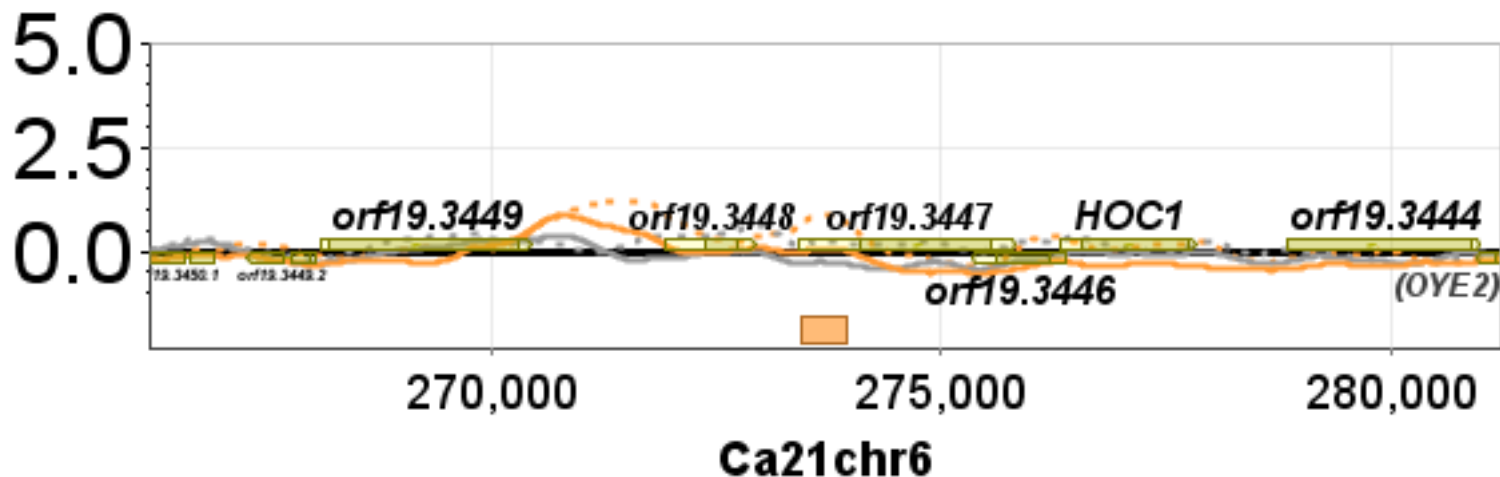

[0.876] Ca21chr6:673598-688597 [+] [ntar\_1018, orf19.5611, BMT4, ntar\_1019, ARG3]

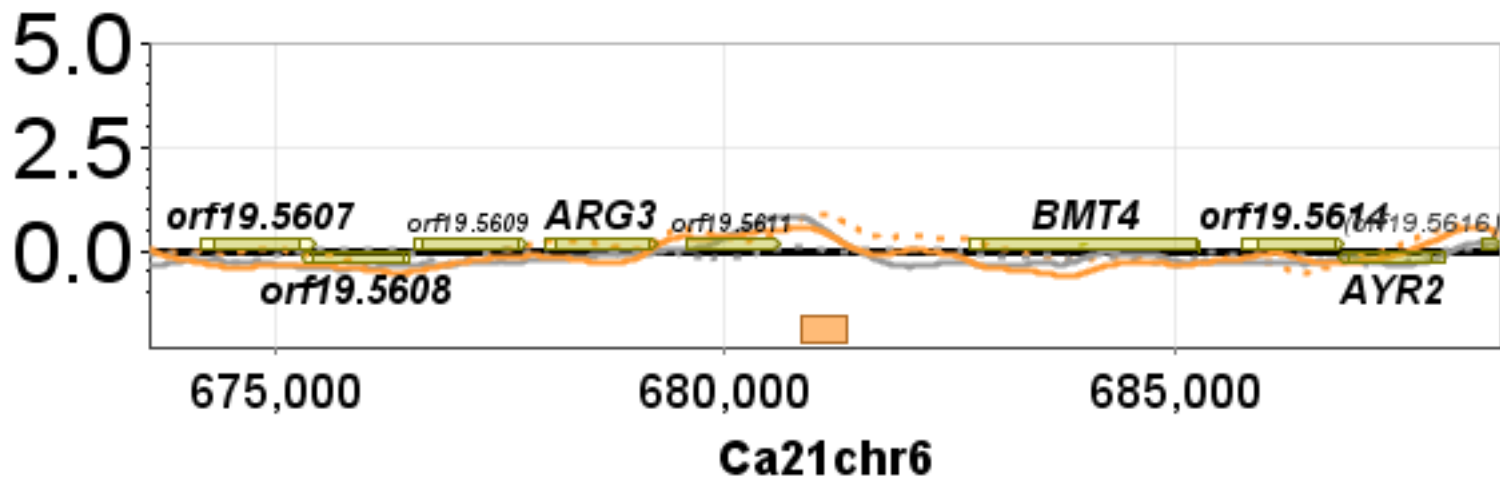

[0.873] Ca21chrR:390994-405993 [+] [SEC4, FRS1, MCI4, IFU5, ntar\_1195]

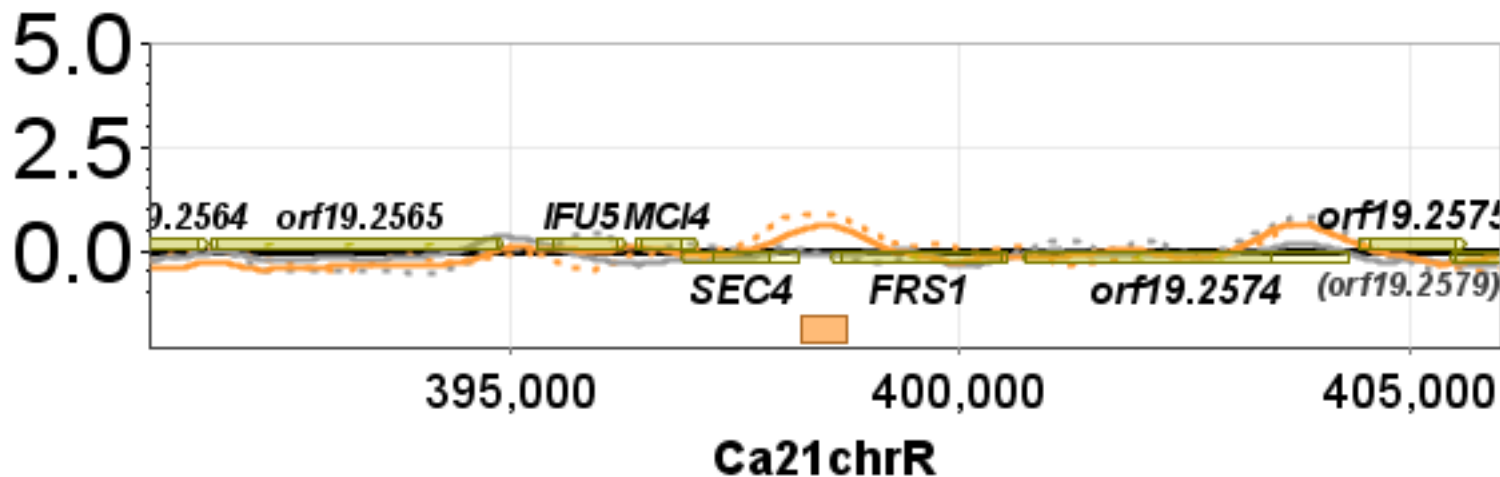

[0.871] Ca21chr2:876773-891772 [+] [STE4, ntar\_362, ntar\_363, ntar\_364, ntar\_365]

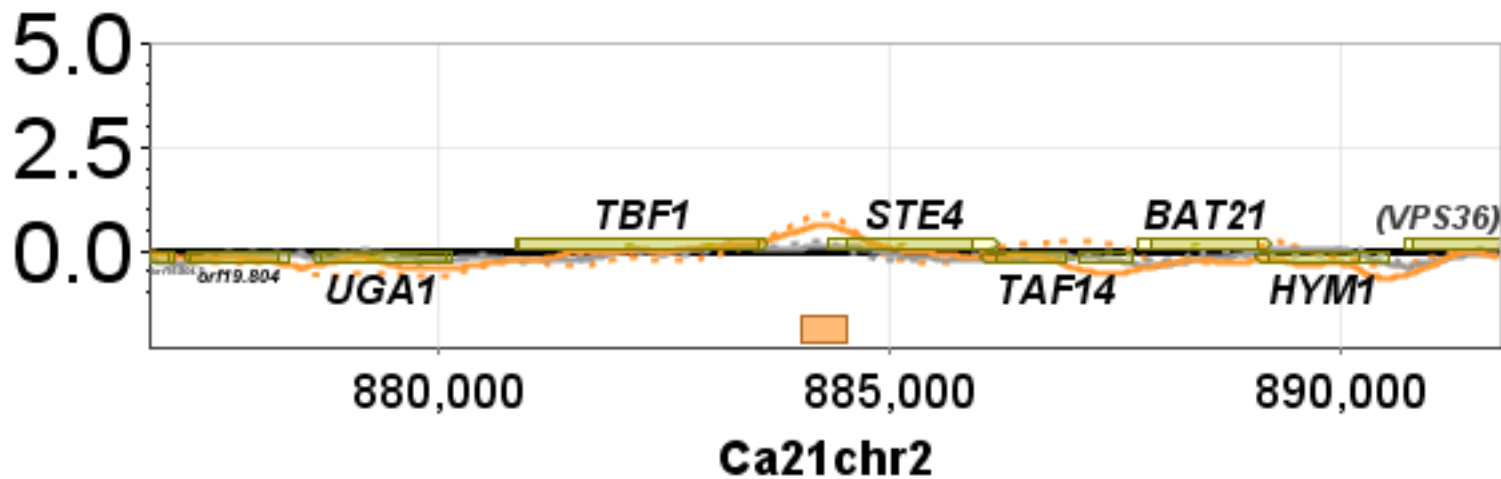

[0.871] Ca21chr4:699650-714649 [+] [VTC4, orf19.3364, DAO2, CSH3, orf19.3362]

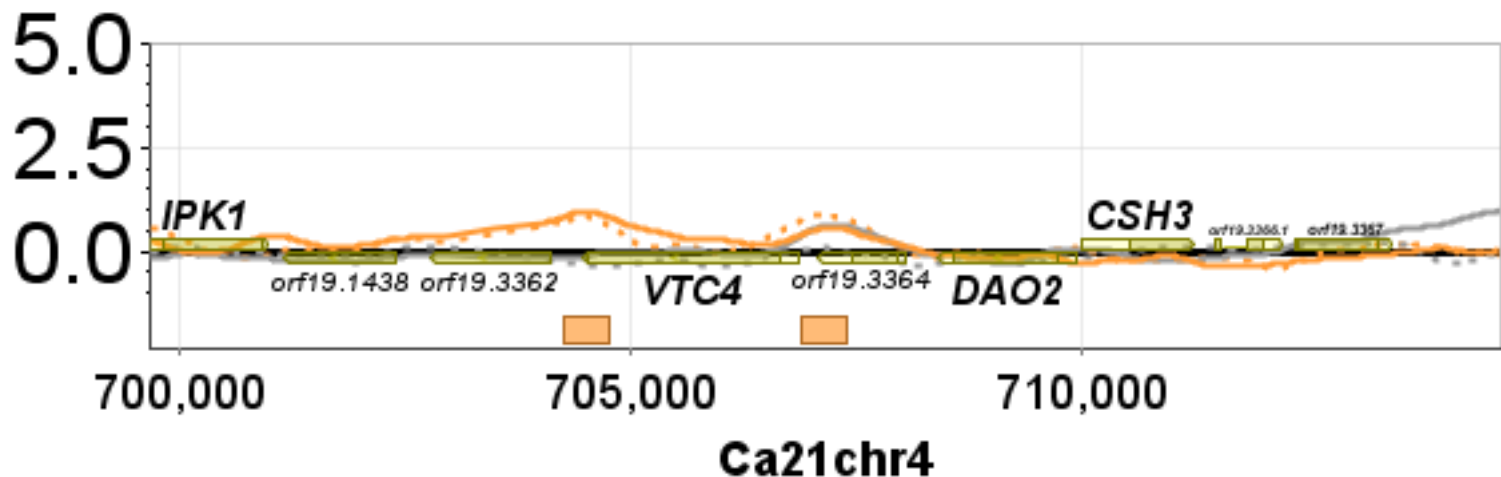

[0.871] Ca21chrR:2079199-2094198 [+] [ntar\_1399, ntar\_1398, ntar\_1400, ntar\_1397.1, ntar\_1400.50]

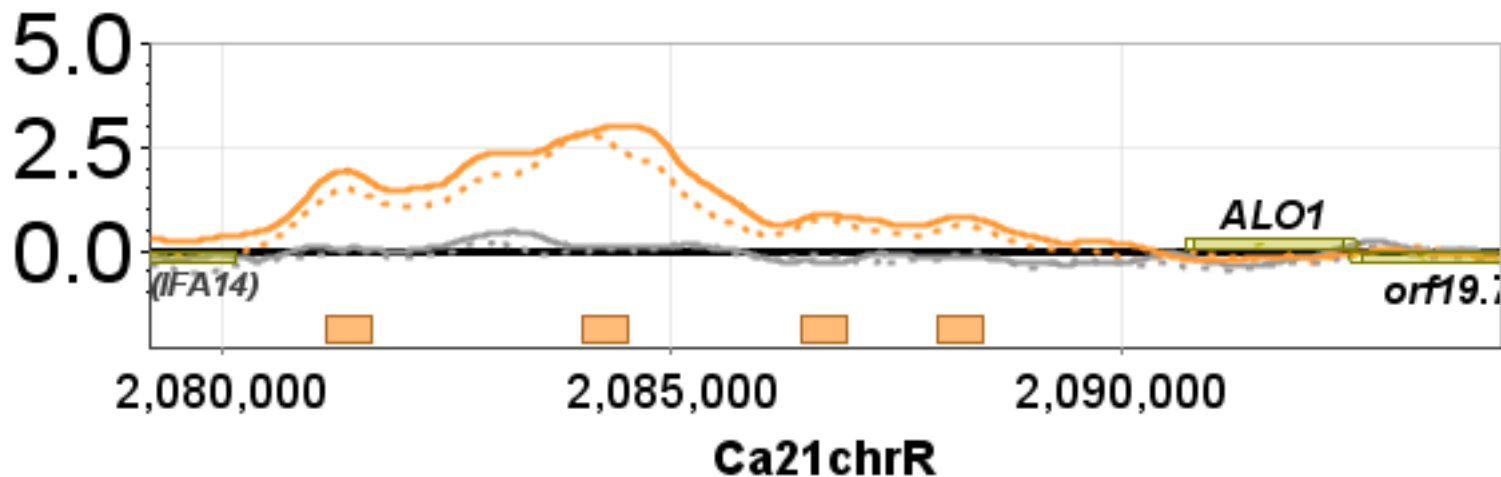

[0.868] Ca21chr1:2839157-2854156 [+] [FAD3, OP4, orf19.4932, RPL14, orf19.4936]

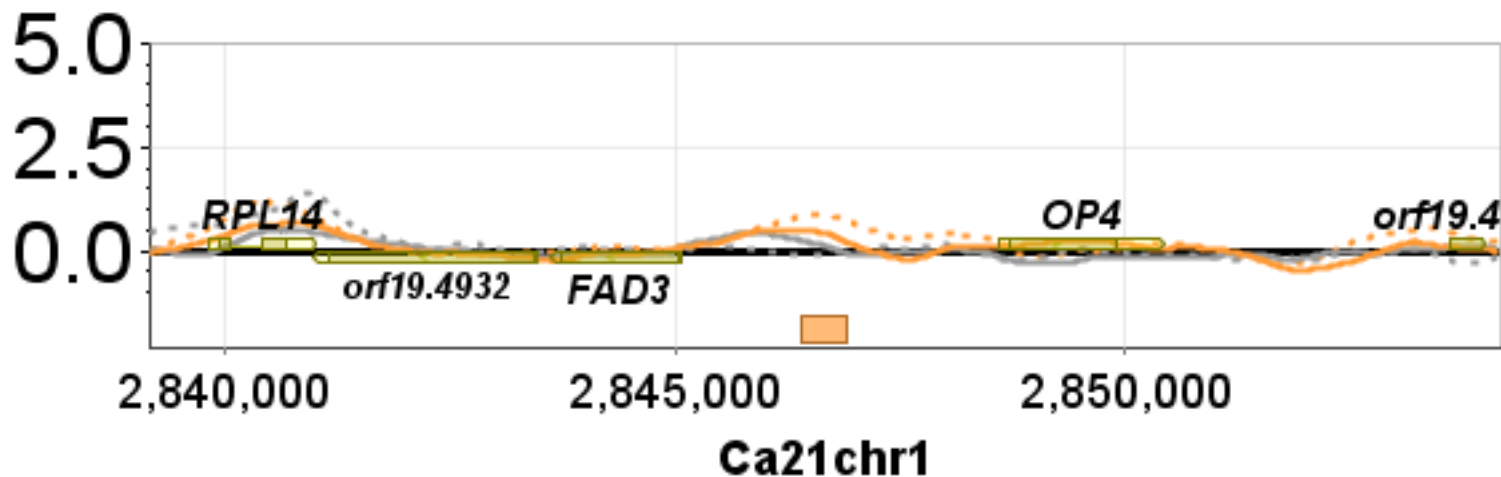

[0.867] Ca21chr3:514670-529669 [+] [ntar\_568, ALR1, orf19.1606, COX7, ntar\_569]

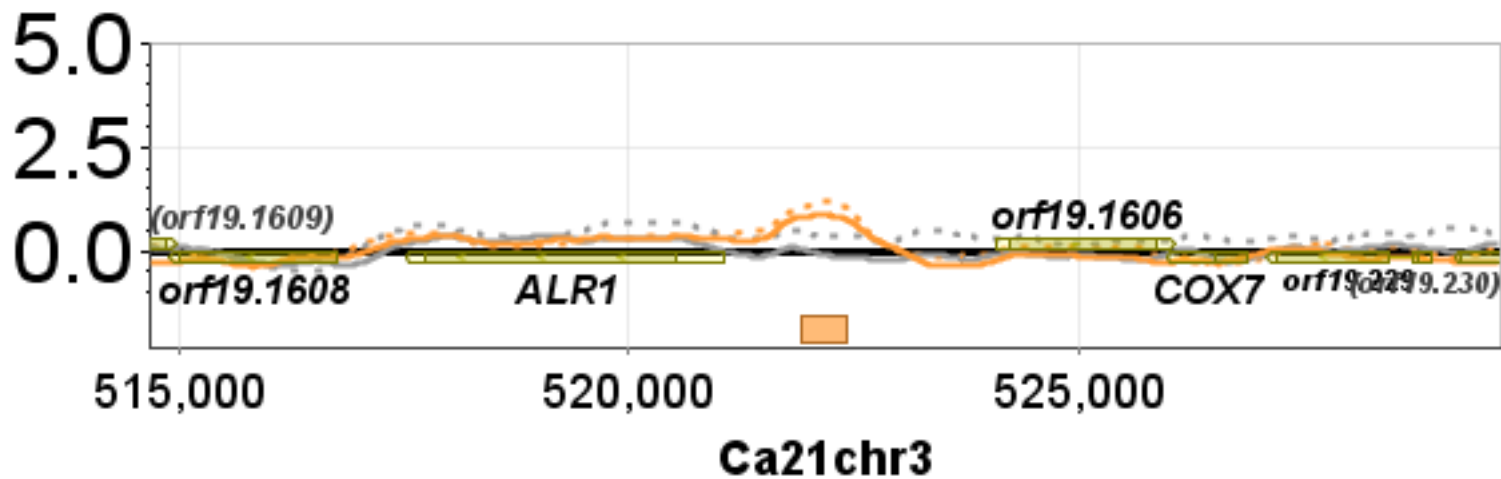

[0.863] Ca21chr2:586746-601745 [+] [ALD5, orf19.5808, DLD1, orf19.5809, HYU1]

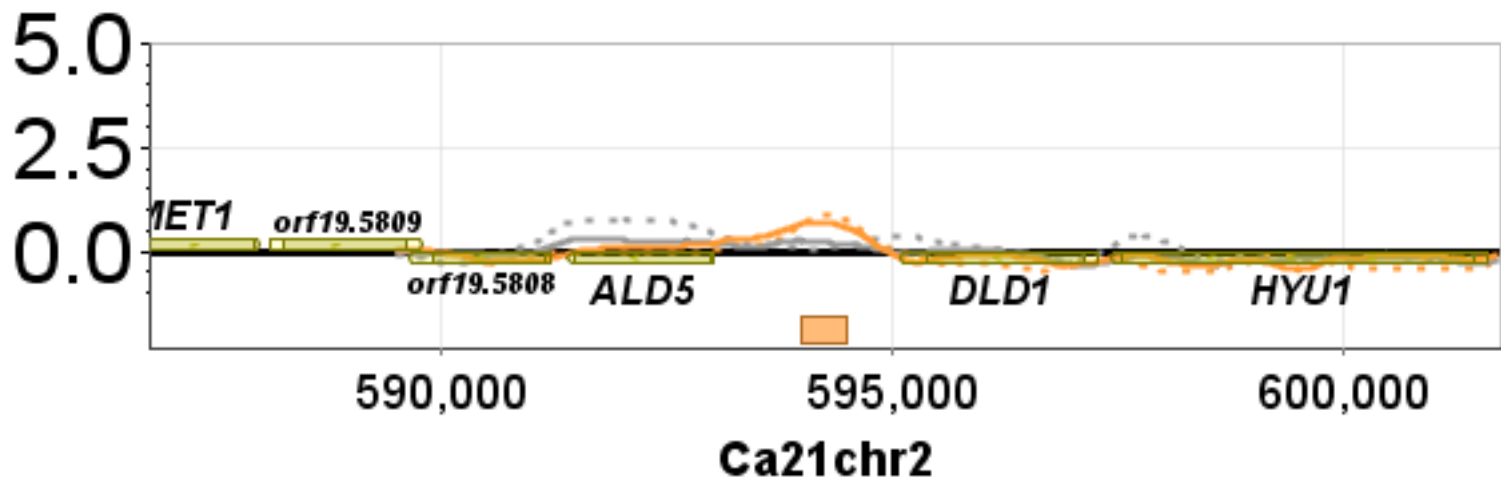

[0.859] Ca21chrR:280463-295462 [+] [ntar\_1185, ntar\_1186, ntar\_1184, ntar\_1183, ntar\_1182.5]

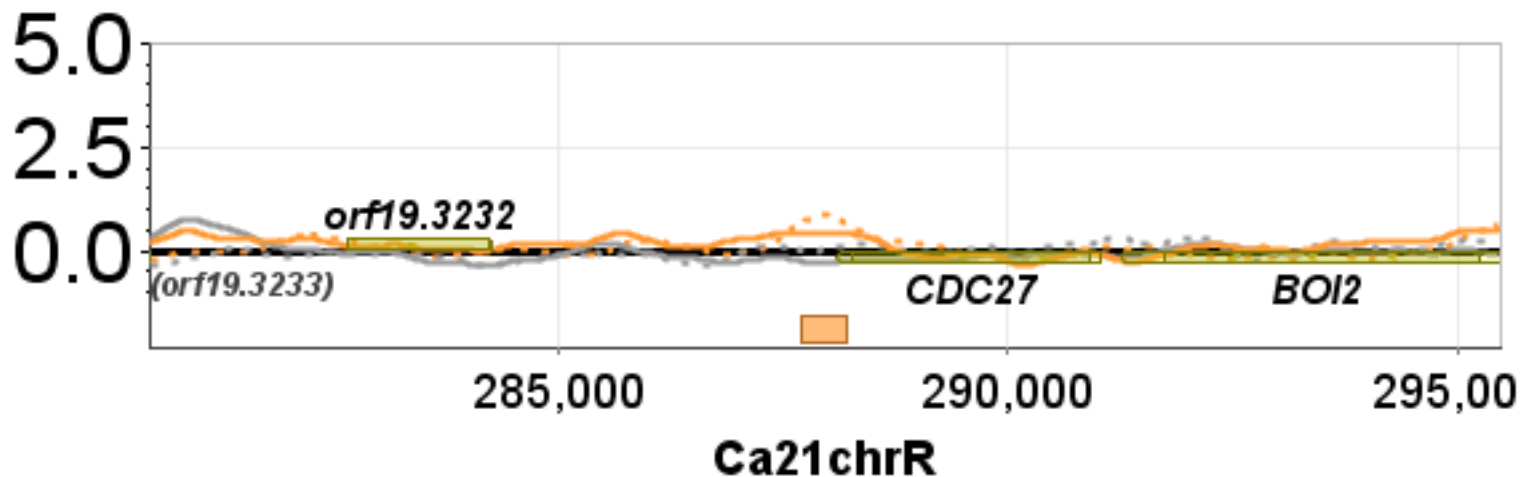

[0.858] Ca21chr1:752993-767992 [+] [DAO1, ENG1, MRPL27, orf19.3064.1, orf19.3063]

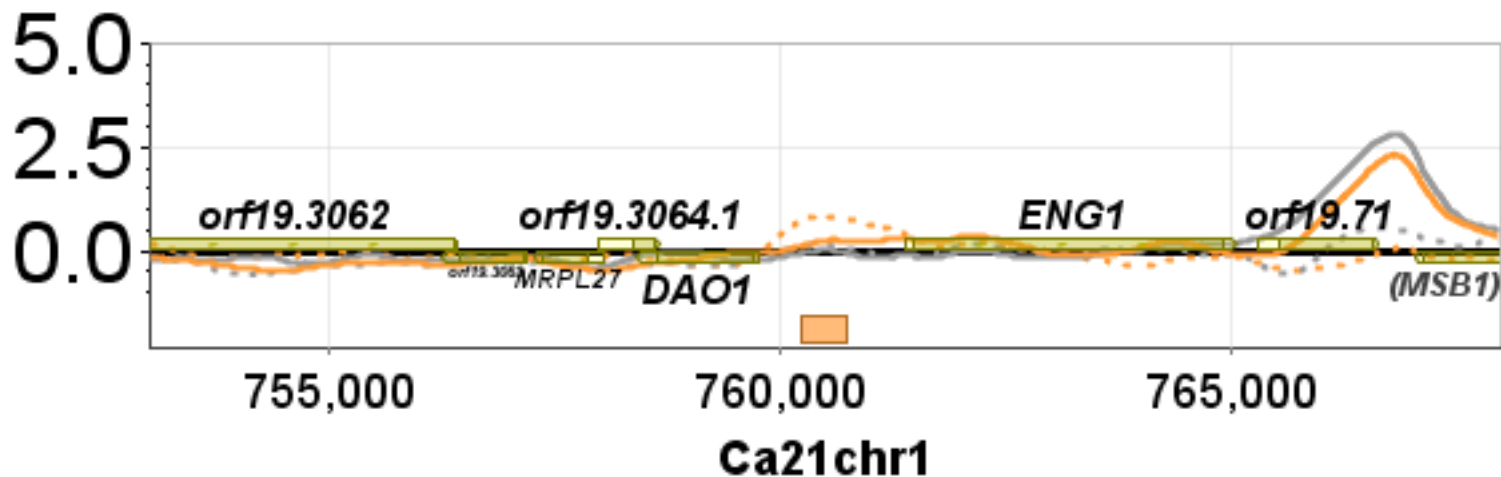

[0.857] Ca21chr3:949167-964166 [+] [orf19.5910, TEC1, CMK1, MAK21]

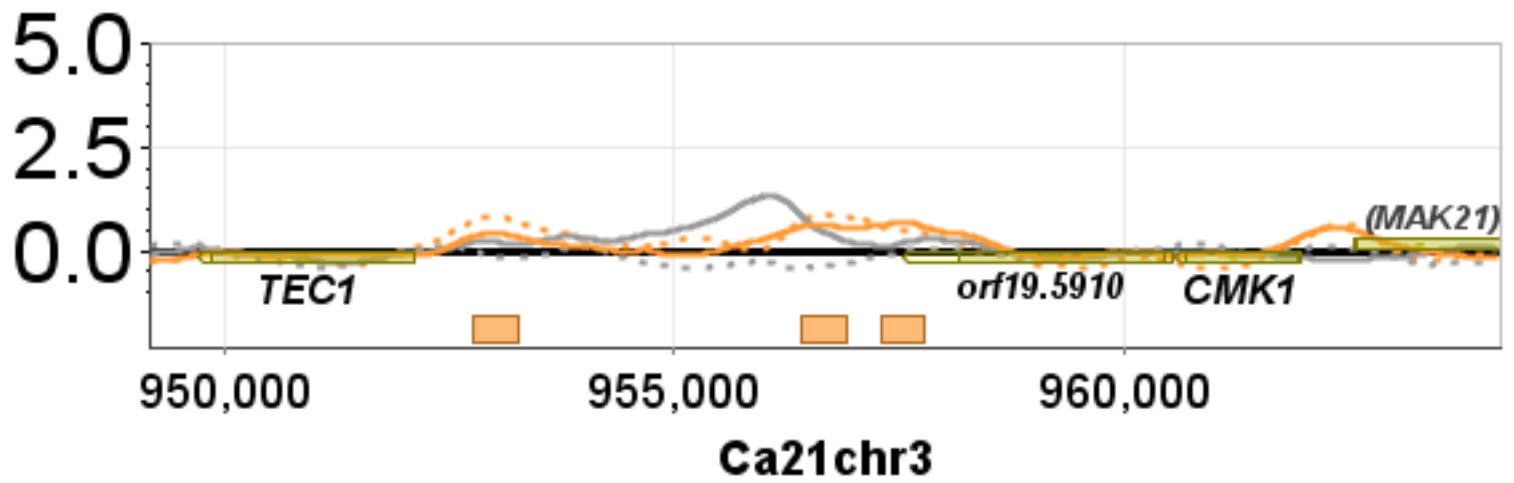

[0.853] Ca21chr1:1228367-1243366 [+] [orf19.2457, orf19.2458, orf19.2455, ntar\_121, orf19.2459]

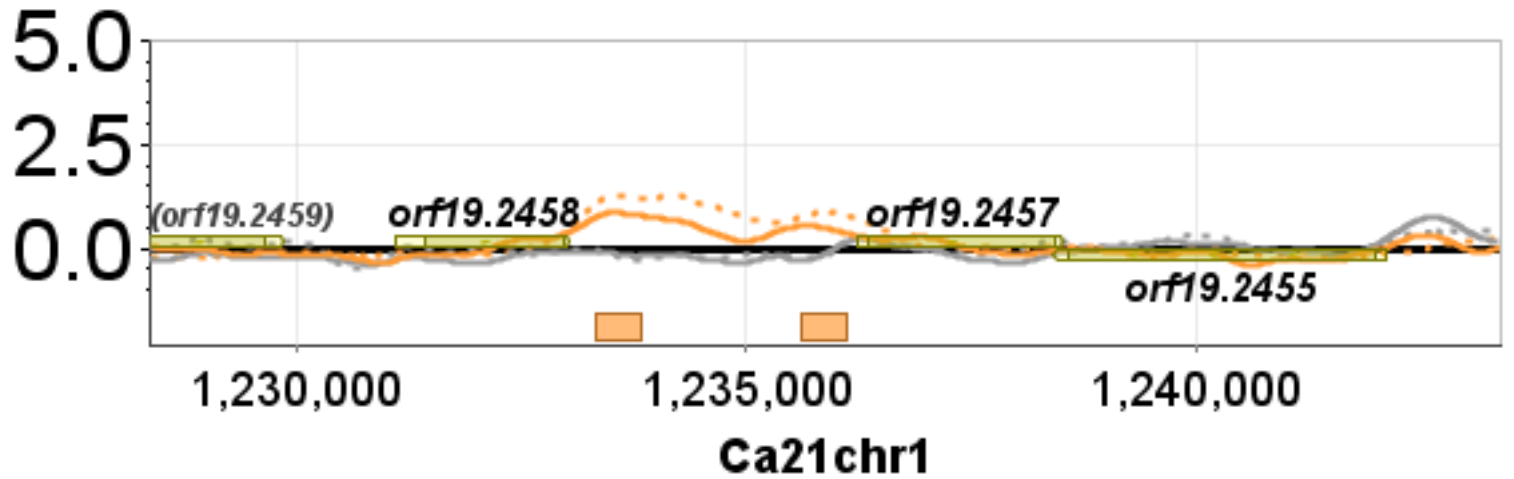

[0.853] Ca21chr1:1321636-1336635 [+] [orf19.1821, ntar\_127]

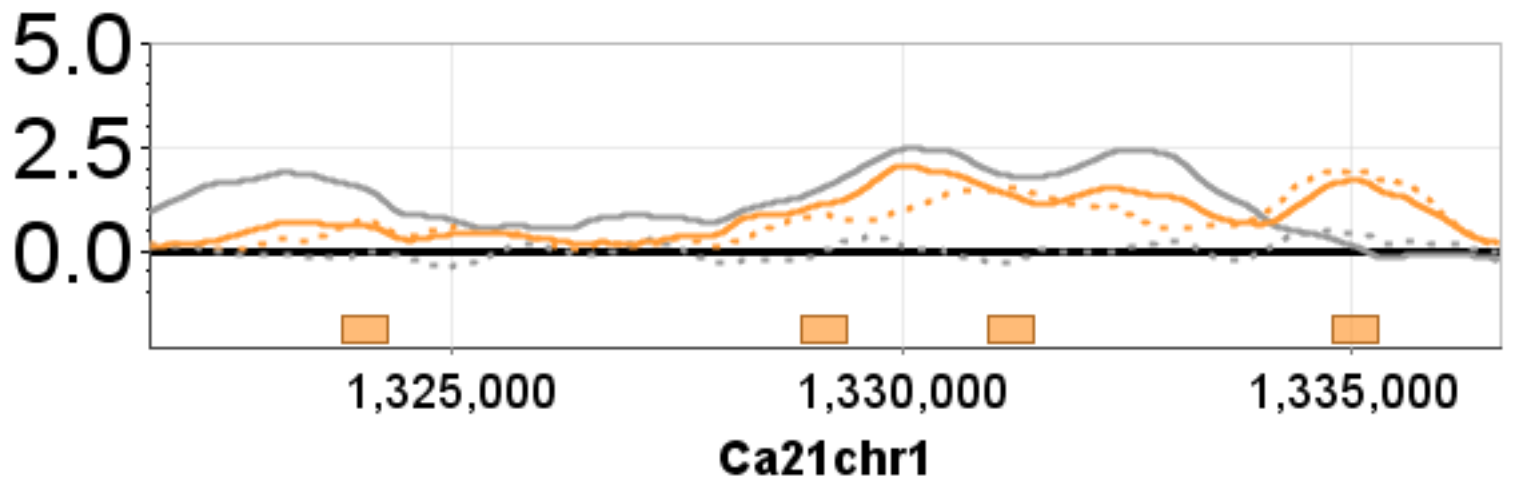

[0.85] Ca21chr5:92828-107827 [+] [orf19.938, orf19.937, orf19.936, NAM7, ntar\_853]

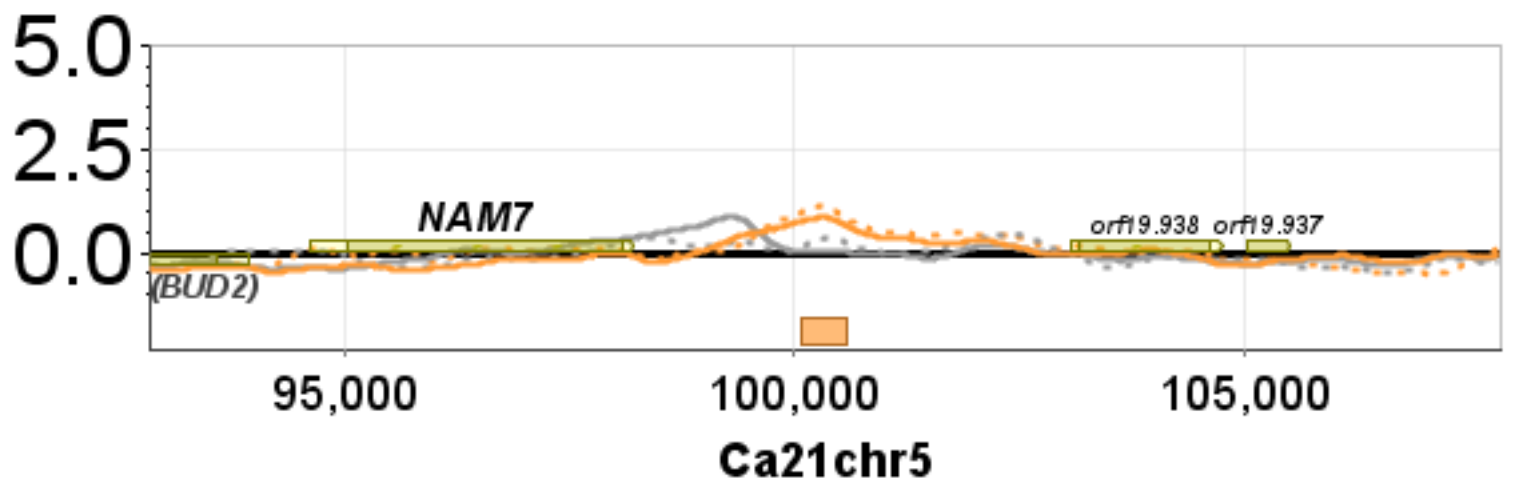

[0.849] Ca21chr1:429175-444174 [+] [HGT2, ntar\_41, ntar\_40, orf19.3667, orf19.3666]

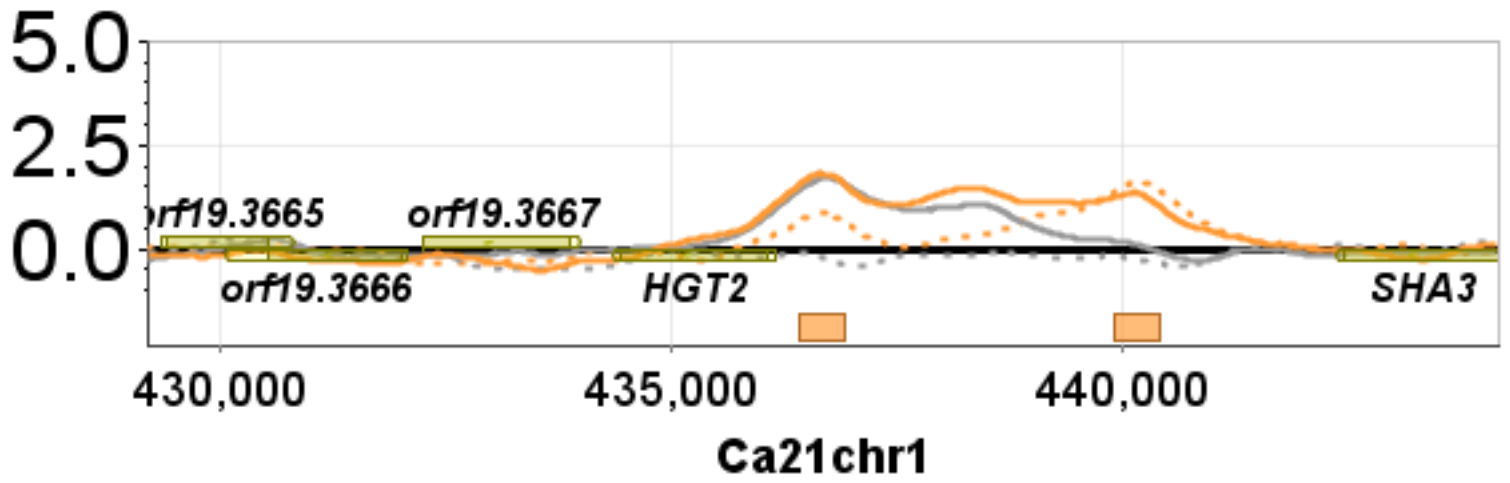

[0.849] Ca21chr3:331485-346484 [+] [TOS1, orf19.1691, orf19.1687, ntar\_553, ntar\_552]

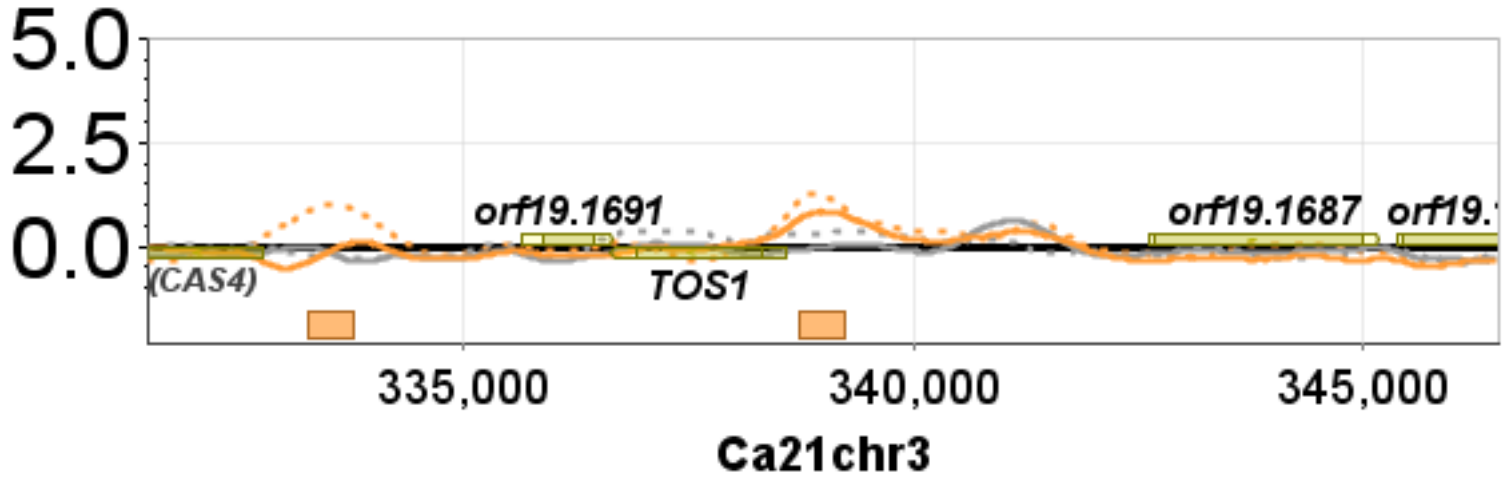

[0.843] Ca21chr4:1462944-1477943 [+] [PDC11, CBF1, orf19.2875, TOP2, PGA15]

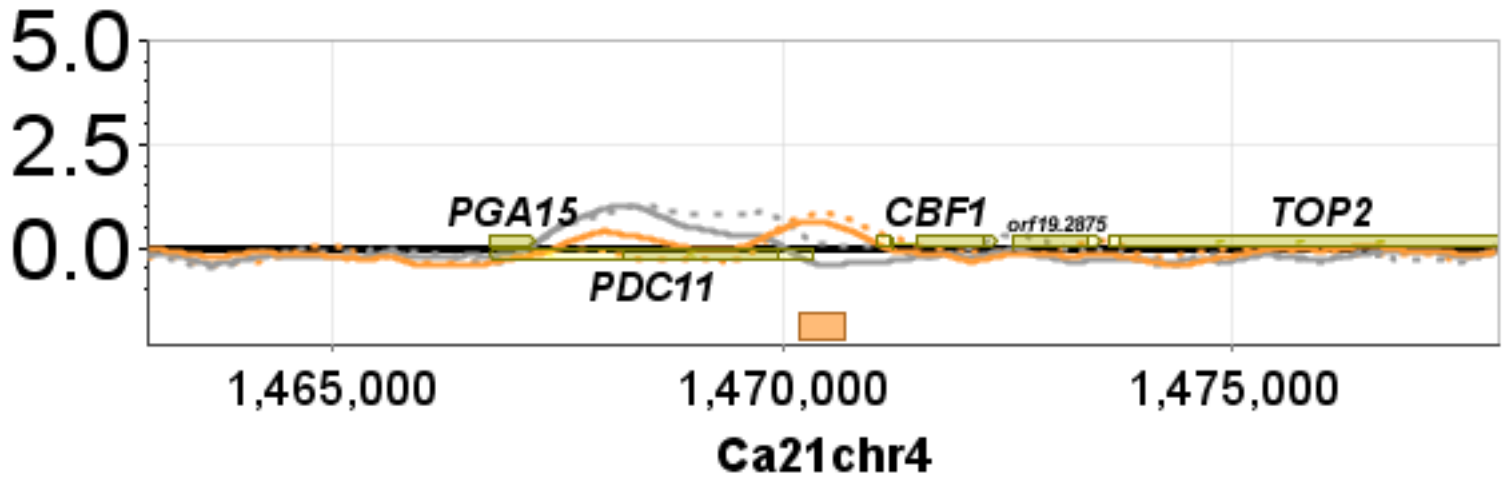

[0.839] Ca21chr1:1971833-1986832 [+] [PGA6, orf19.4766, orf19.4764, orf19.4763, ntar\_186]

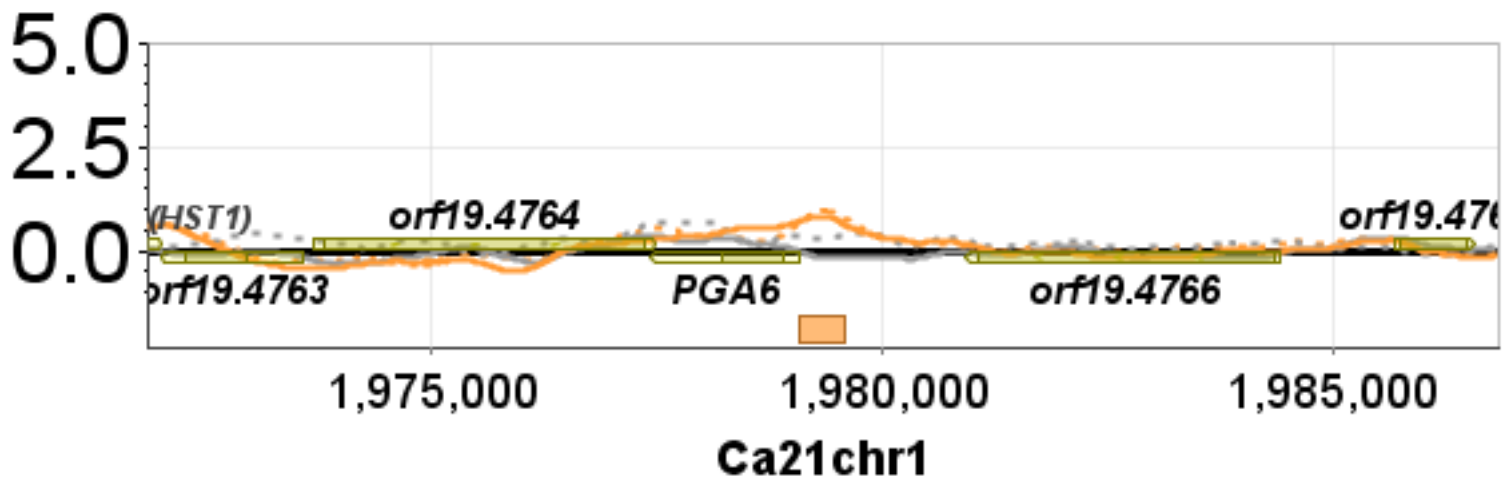

[0.836] Ca21chr4:1093578-1108577 [+] [ntar\_805, ntar\_804, ntar\_806, HAP41, ntar\_807]

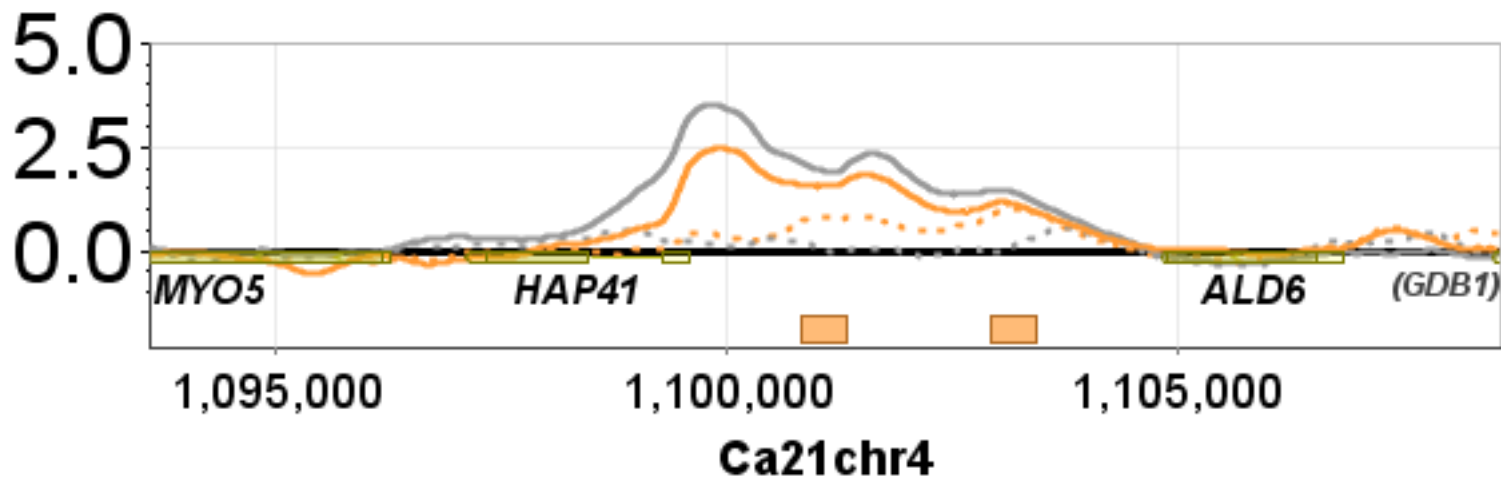

[0.834] Ca21chr1:2677154-2692153 [+] [orf19.5233, RBD1, CSI2, orf19.5231.2, orf19.5231]

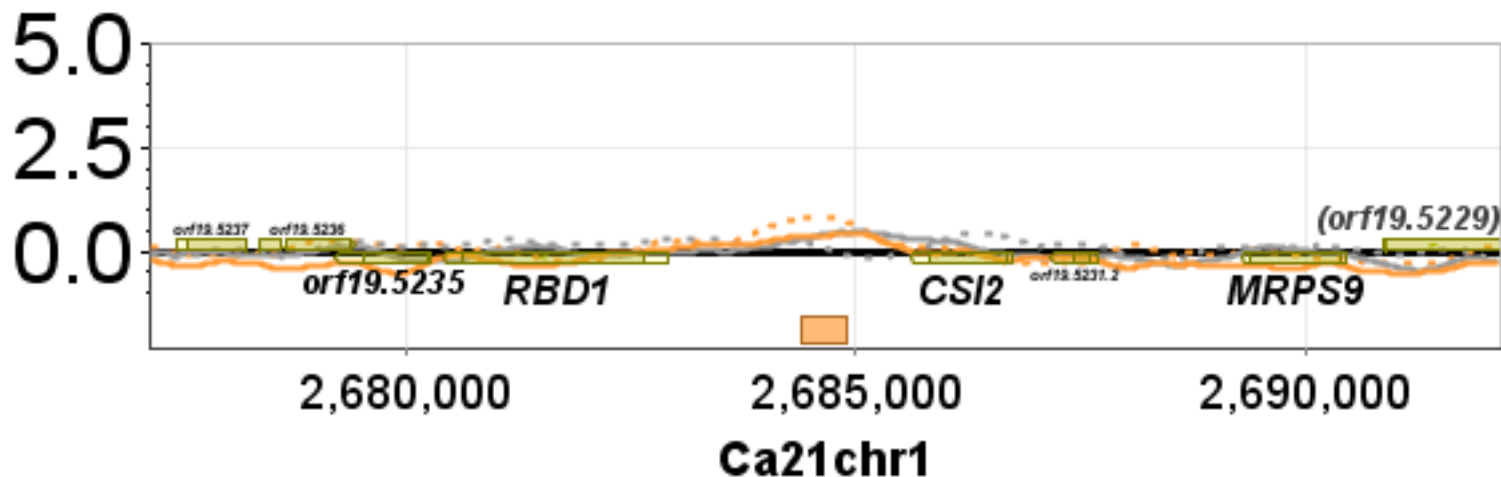

[0.831] Ca21chr3:1436218-1451217 [+] [ntar\_656, ISW2, ALS7, DOT1]

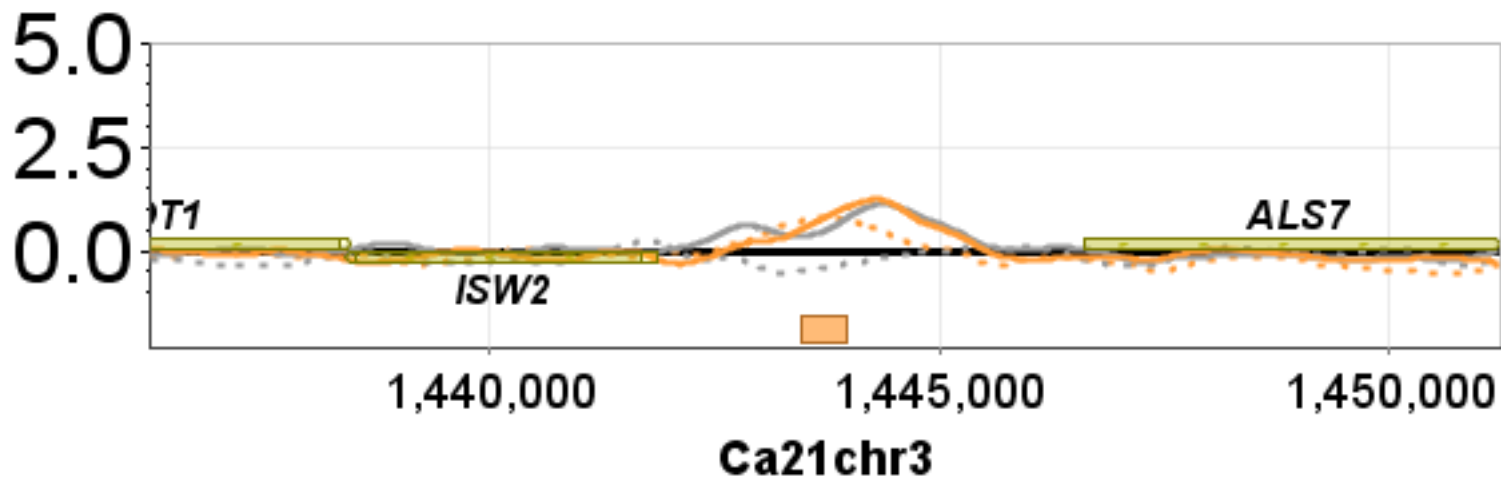

[0.828] Ca21chr6:466392-481391 [+] [orf19.3469, ALG11, orf19.3467, orf19.3470, orf19.3473]

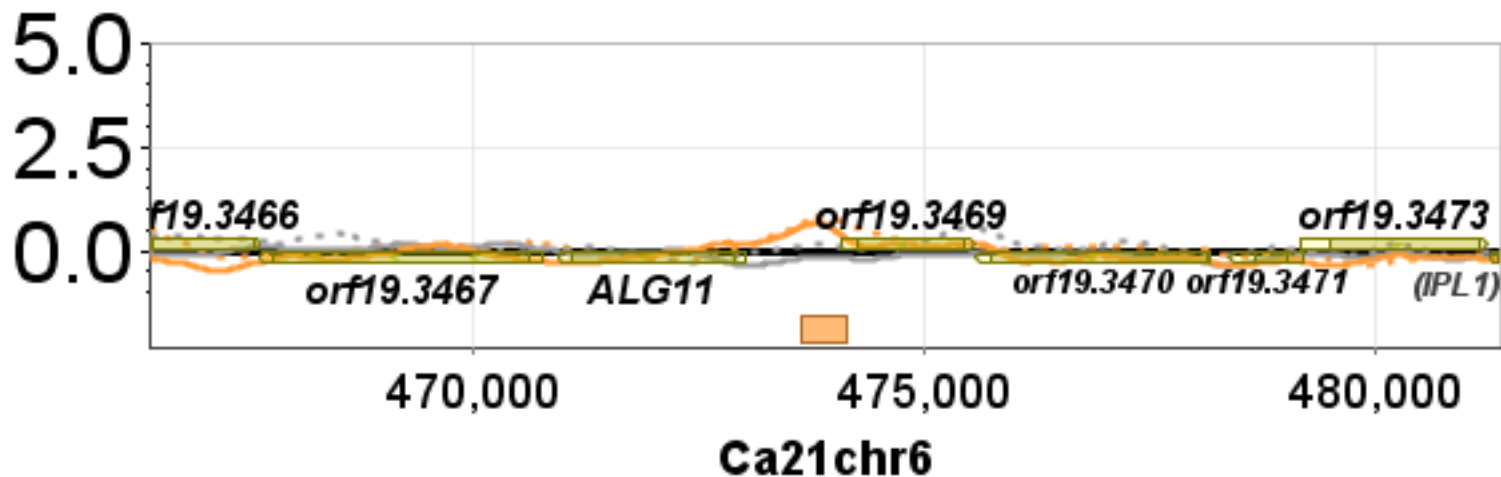

[0.824] Ca21chr2:1810739-1825738 [+] [orf19.213, VPS28, orf19.211, orf19.215, orf19.216]

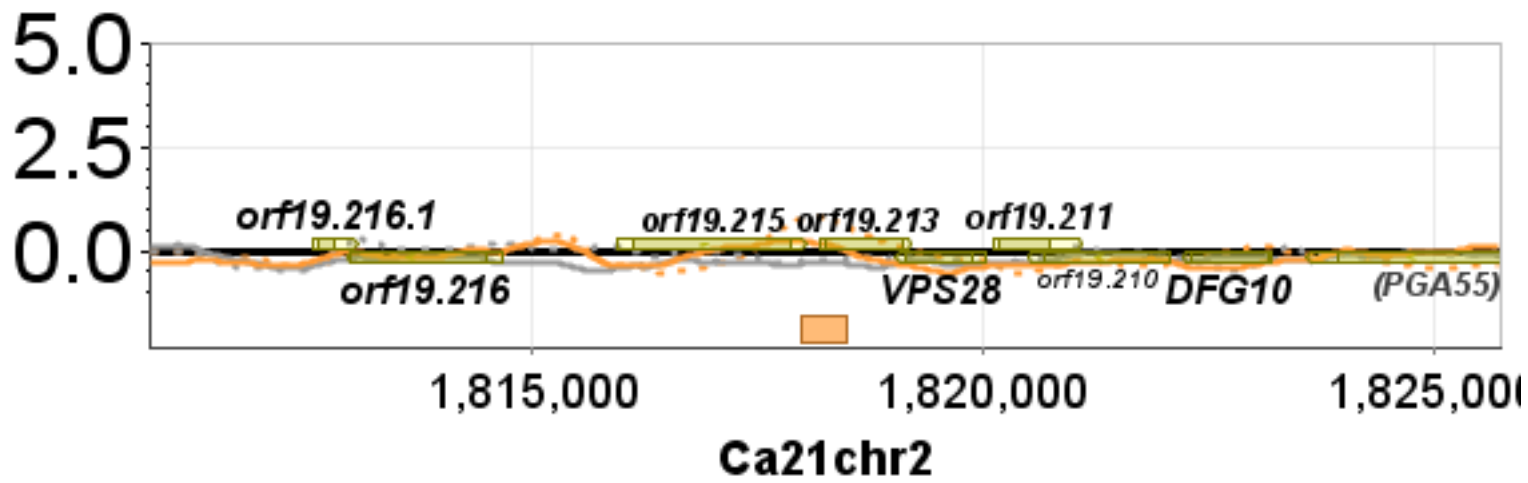

[0.823] Ca21chr1:2335901-2350900 [+] [orf19.1005, orf19.1830, ntar\_220, ntar\_221, ntar\_219]

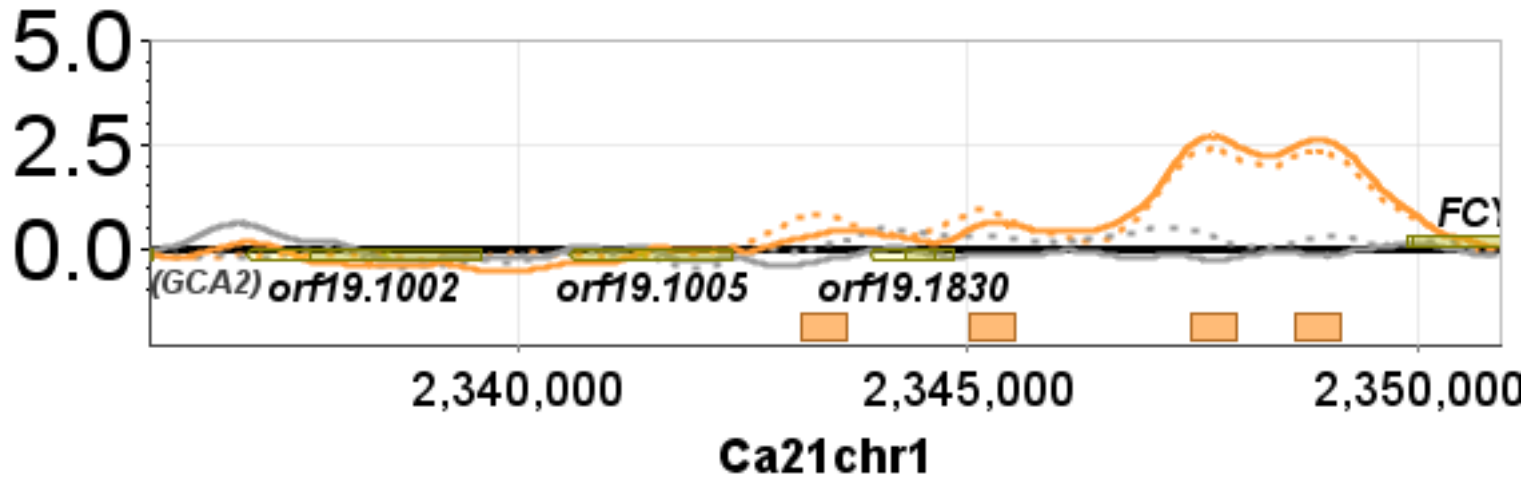

[0.822] Ca21chr1:2940472-2955471 [+] [orf19.4976, HYR1, KNS1]

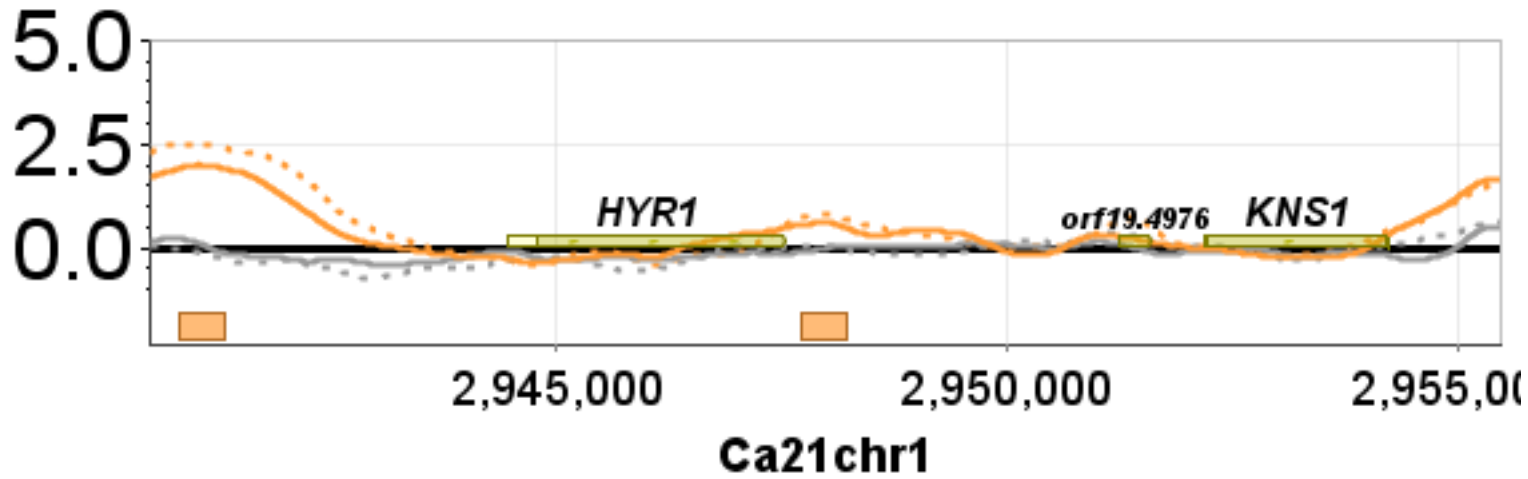

[0.822] Ca21chrR:2080716-2095715 [+] [ntar\_1400.50, ntar\_1400, ntar\_1400.51, ntar\_1399, ntar\_1400.52]

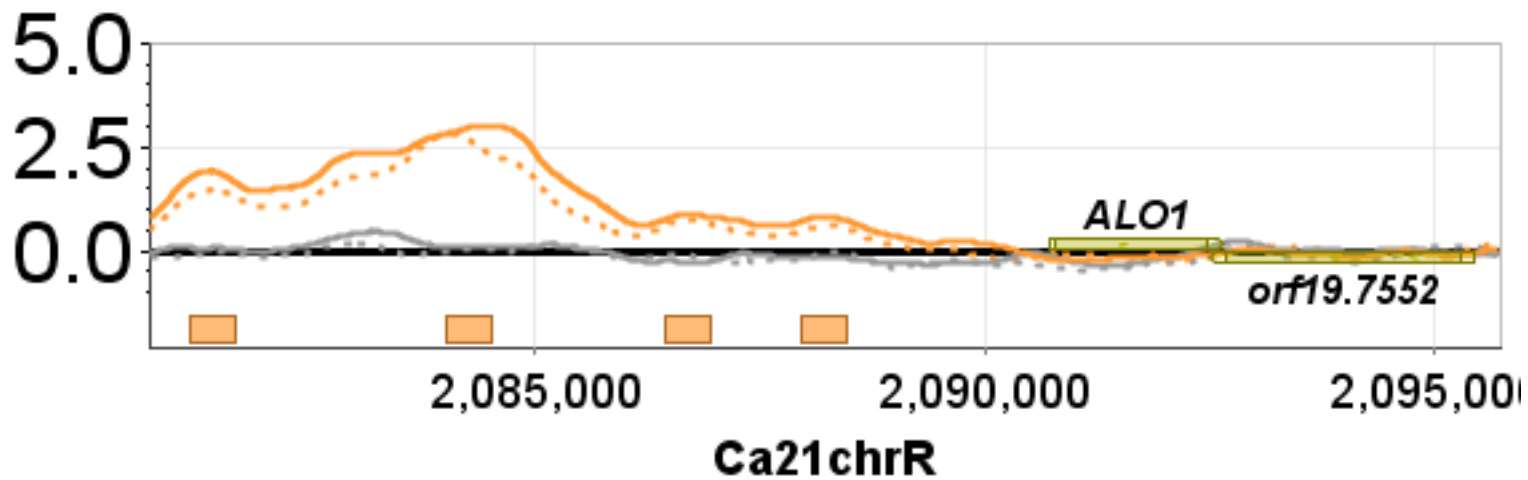



[0.82] Ca21chr3:1493112-1508111 [+] [OPI3, JEN1, LYS9, orf19.7445, orf19.7444]

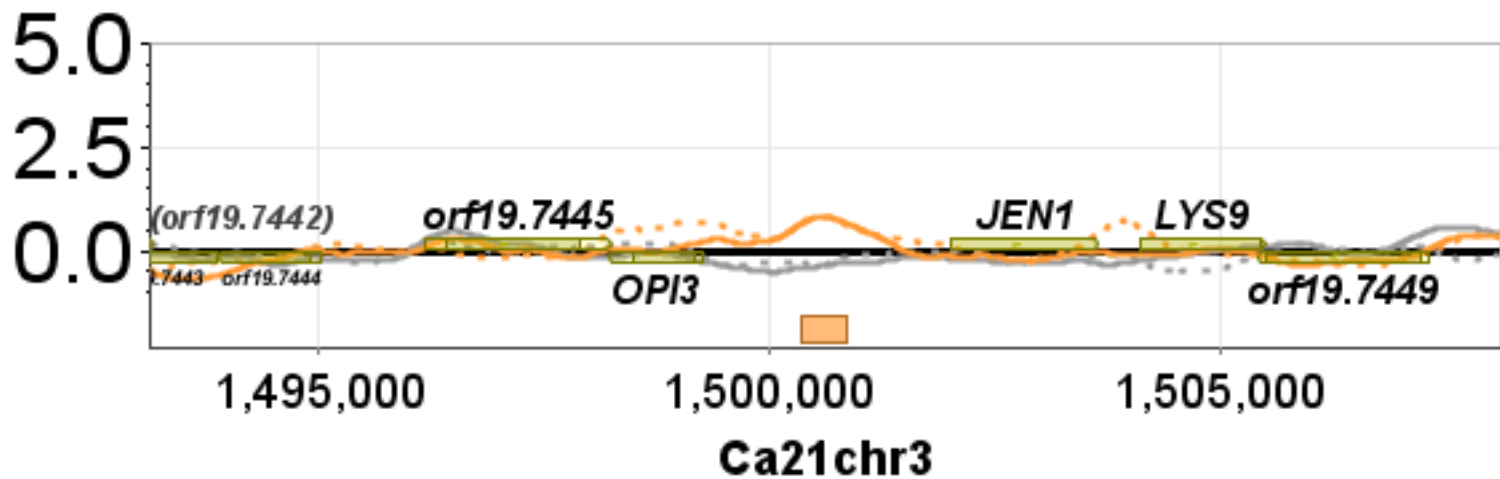

[0.818] Ca21chr3:945523-960522 [+] [TEC1, orf19.5910]

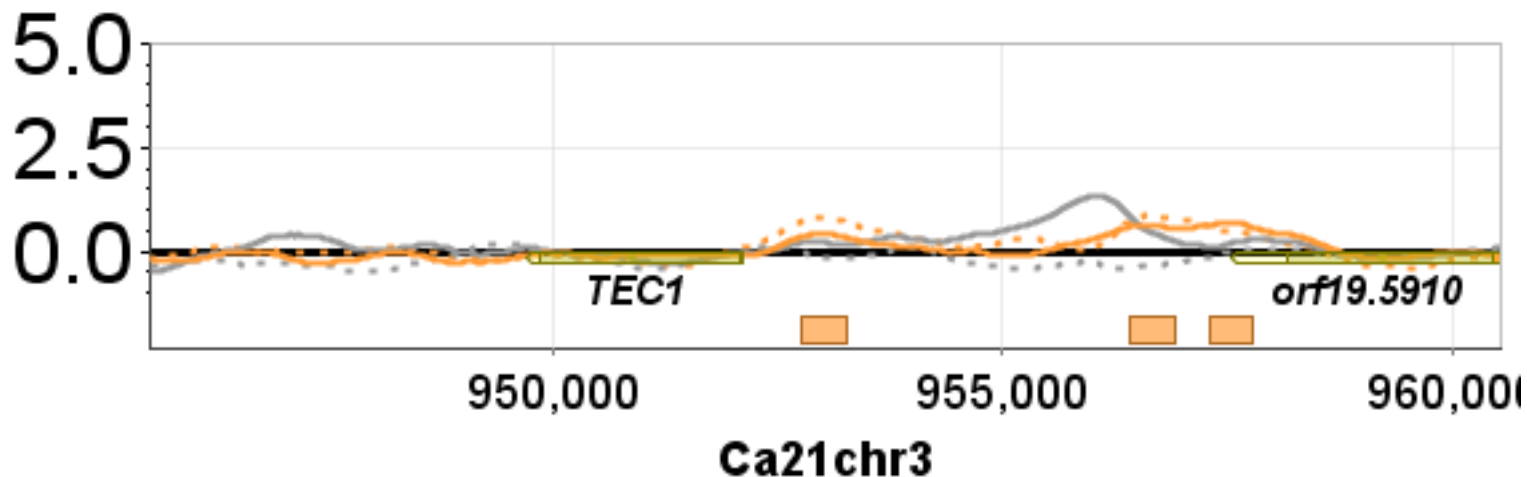

[0.816] Ca21chr6:303813-318812 [+] [ntar\_989, ntar\_990, ntar\_988, orf19.3432, OYE23]

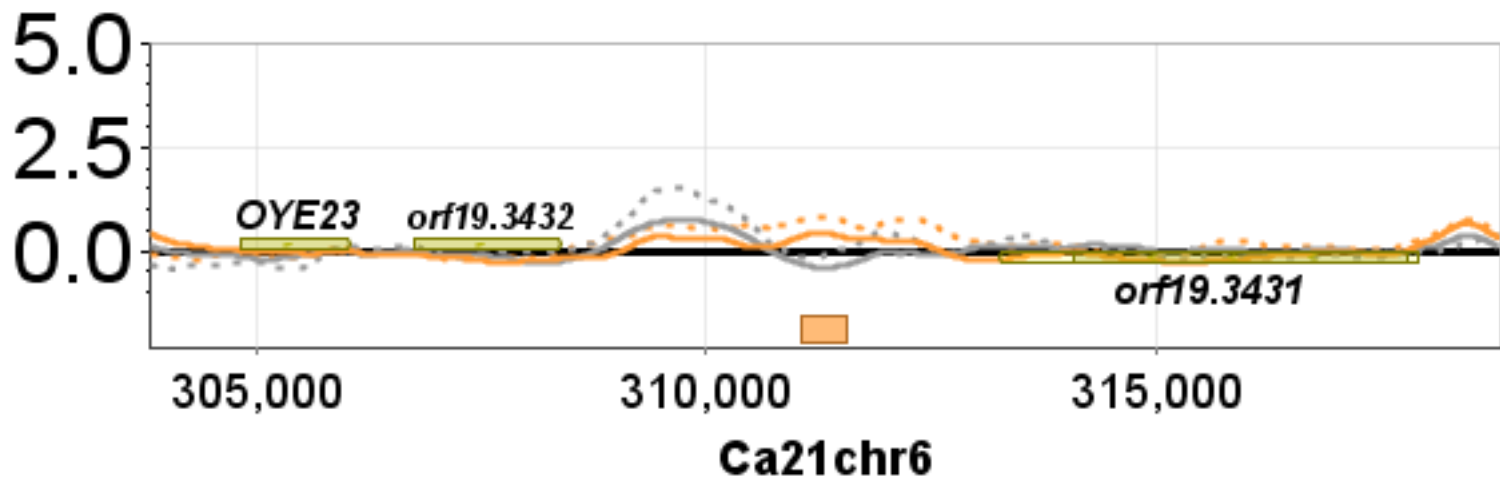

[0.812] Ca21chr3:400177-415176 [+] [tv(aac)2, MNT2, orf19.1662, DBP5, tk(uuu)1]

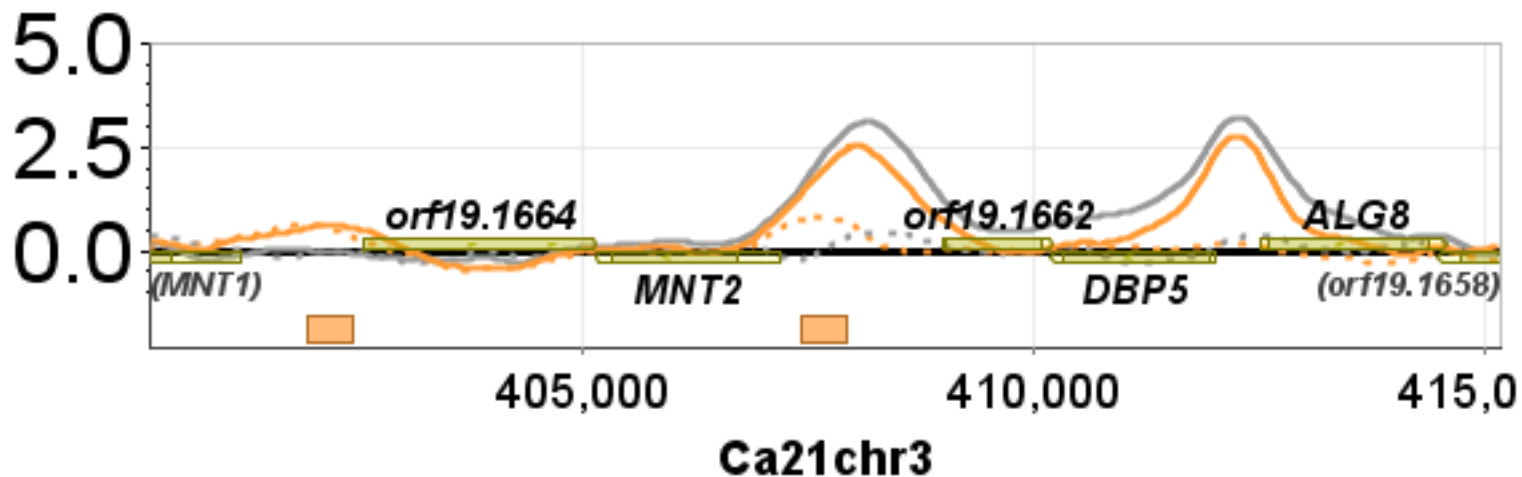

[0.811] Ca21chr3:558779-573778 [+] [orf19.251, ntar\_572, SLC1, orf19.252, orf19.254]

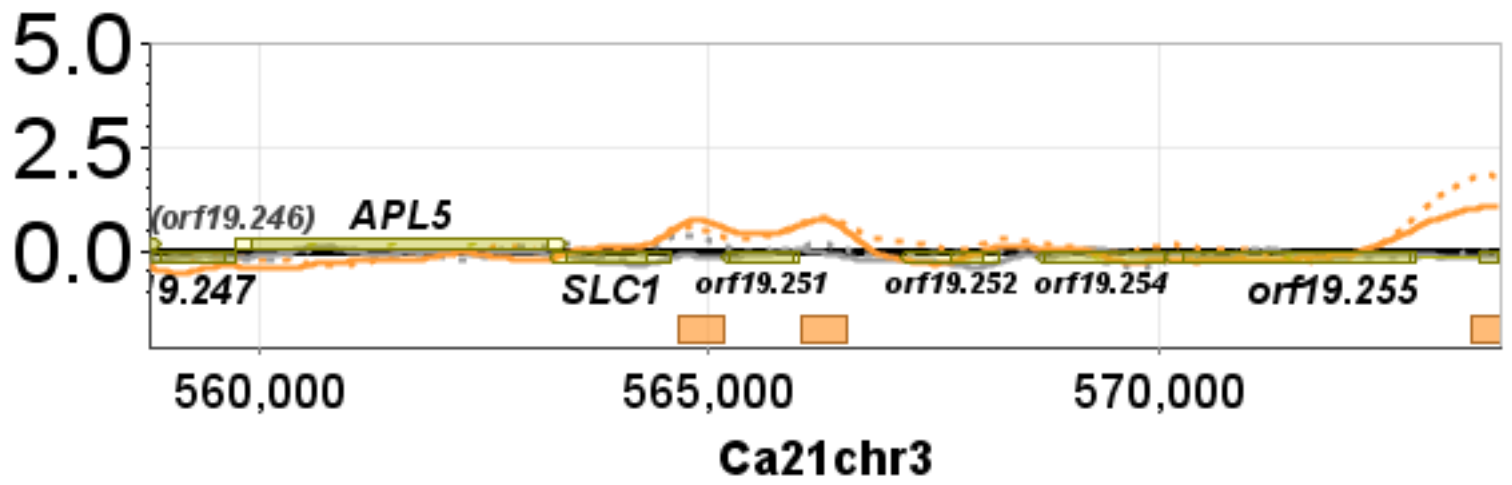

[0.81] Ca21chr2:1846325-1861324 [+] [ASN1, ntar\_468, orf19.199, orf19.4066, orf19.200]

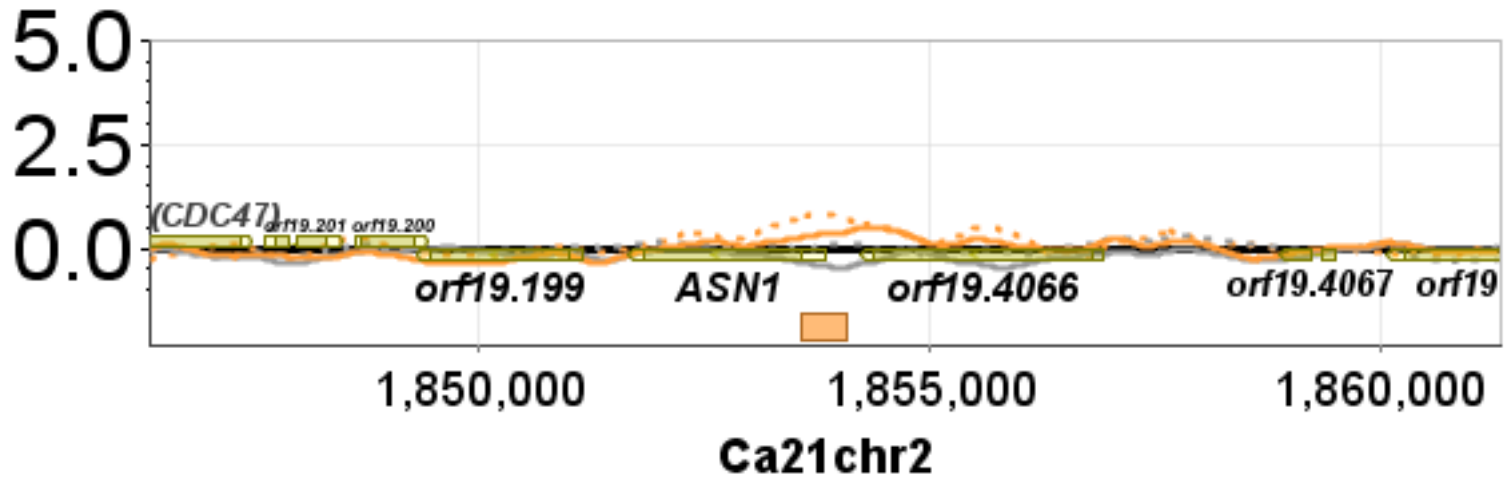

[0.809] Ca21chr7:127565-142564 [+] [MET28, orf19.7044, RTF1, RPS28B, ntar\_1061]

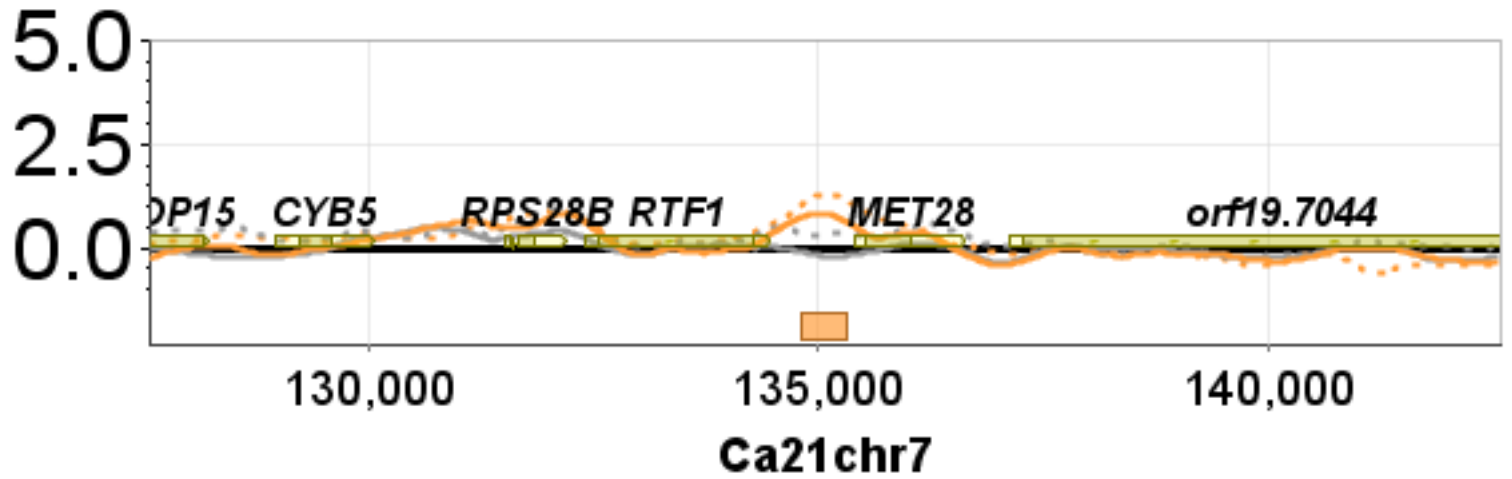

[0.807] Ca21chr5:1080544-1095543 [+] [ntar\_960, orf19.3984, ntar\_959, ntar\_958, ntar\_961]

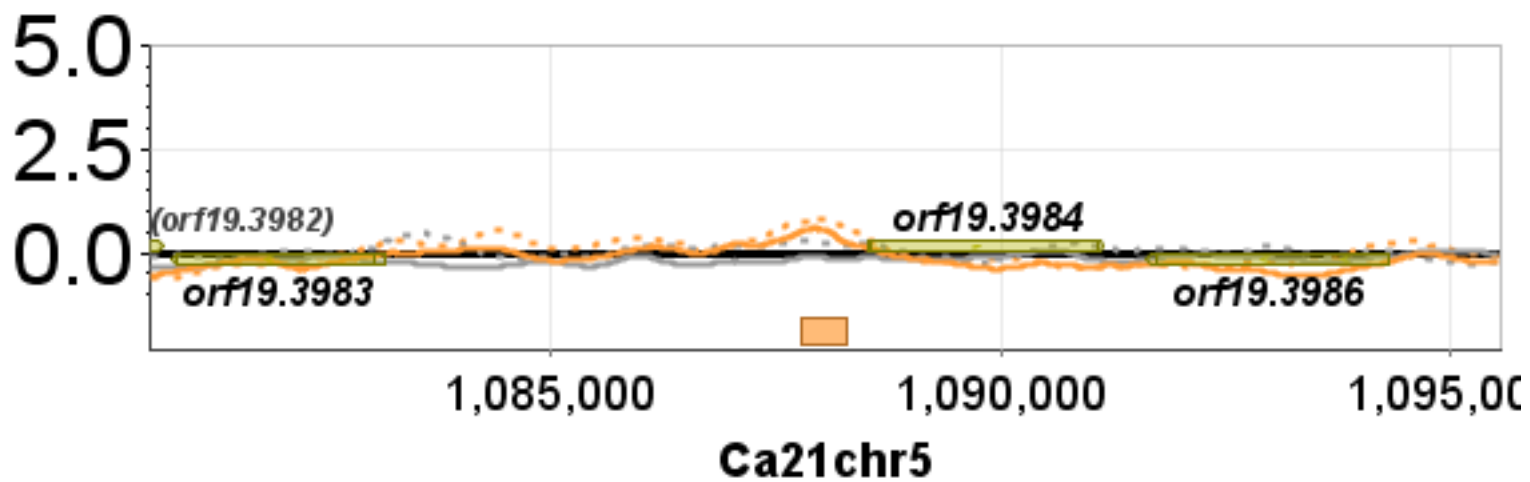

[0.806] Ca21chr4:568637-583636 [+] [ntar\_770, HIT1, CGR1, orf19.2721, orf19.2724]

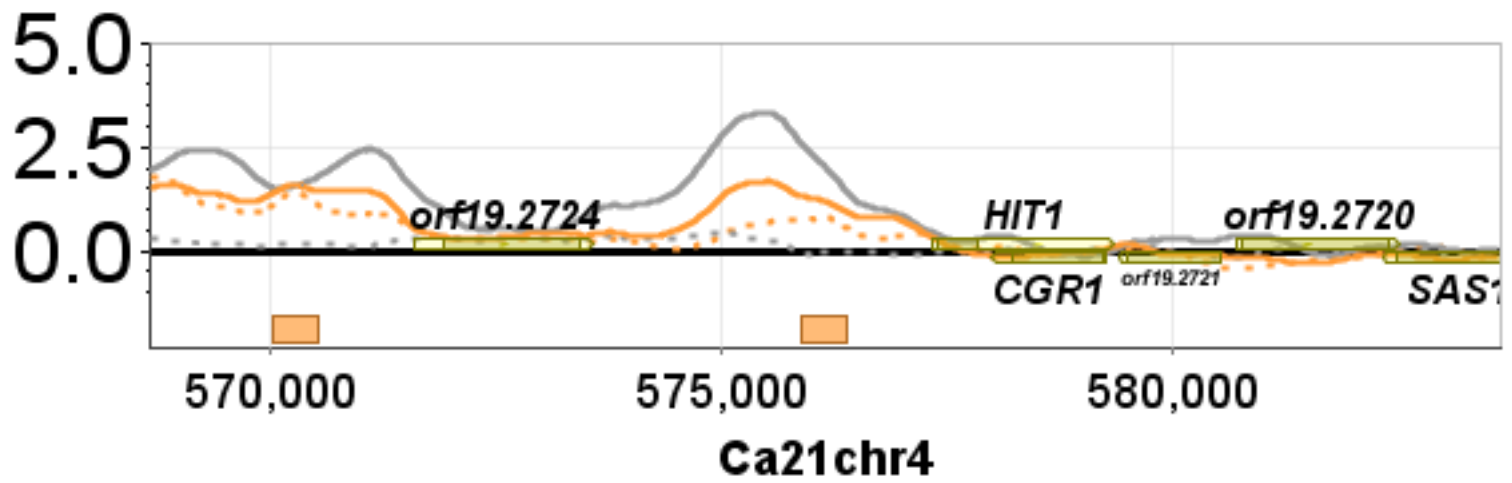

[0.803] Ca21chrR:2092722-2107721 [+] [YTA6, orf19.7556, FGR46, orf19.7555, orf19.7554]

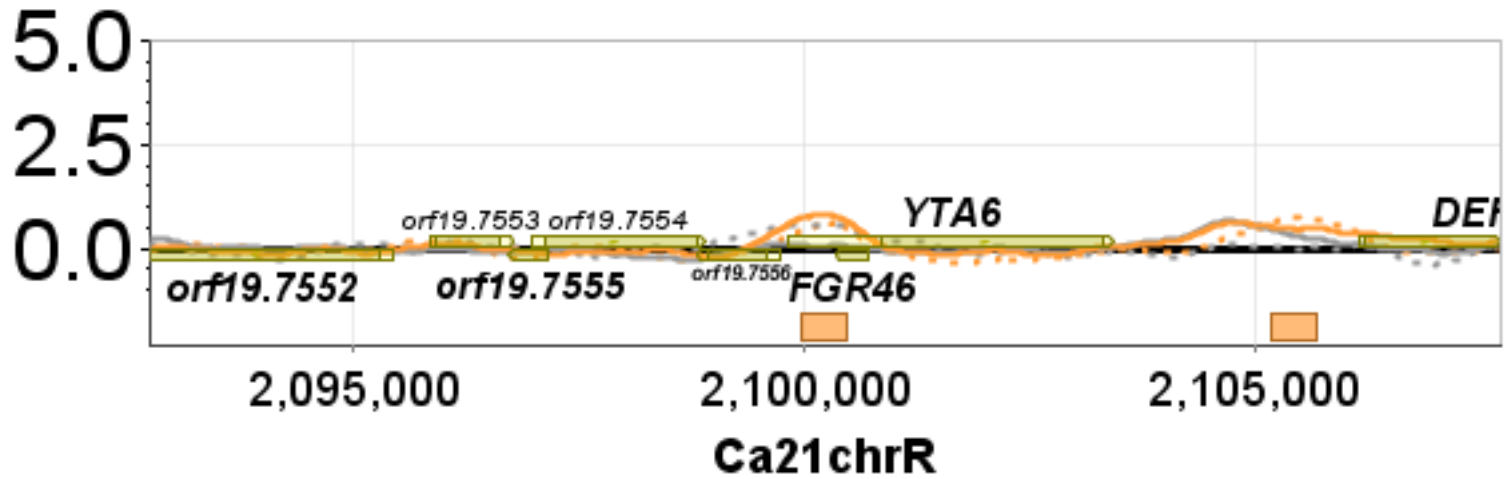

[0.802] Ca21chr1:363887-378886 [+] [SWI4, HOL4, orf19.4544, MAK32, UGA2]

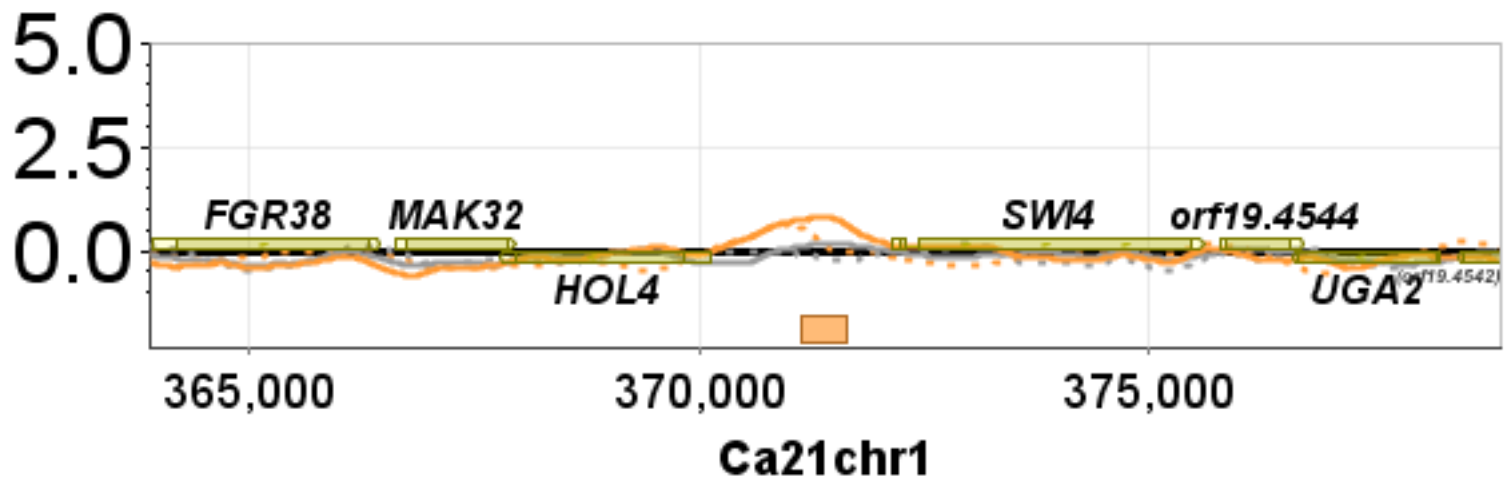

[0.793] Ca21chr6:182718-197717 [+] [ntar\_978, CAN1, TOP1, HAL21, orf19.95]

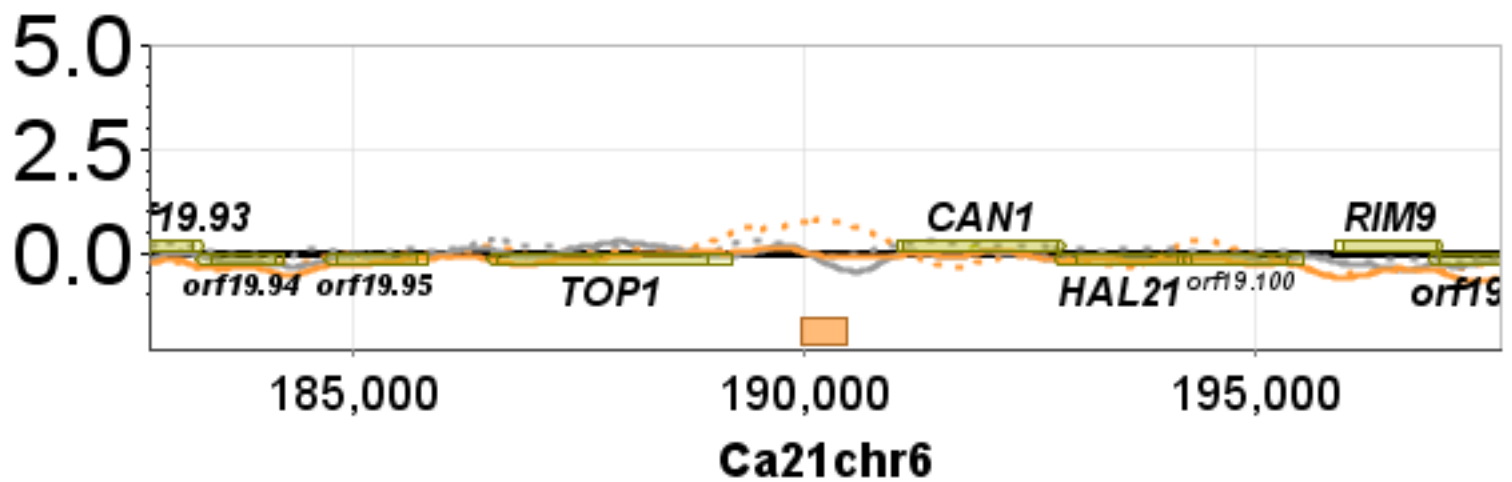

[0.793] Ca21chrR:540311-555310 [+] [orf19.3719, ntar\_1209, OPT4, orf19.3720, ntar\_1208]

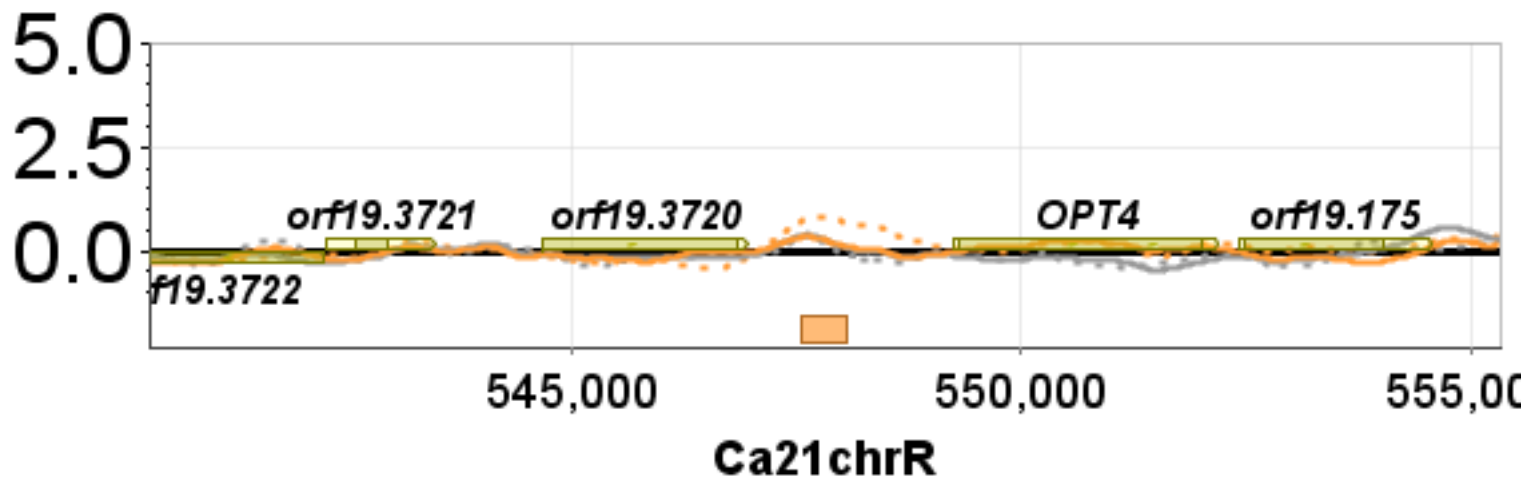

[0.793] Ca21chrR:734646-749645 [+] [orf19.2394, orf19.2392, orf19.2393, orf19.2391, IME2]

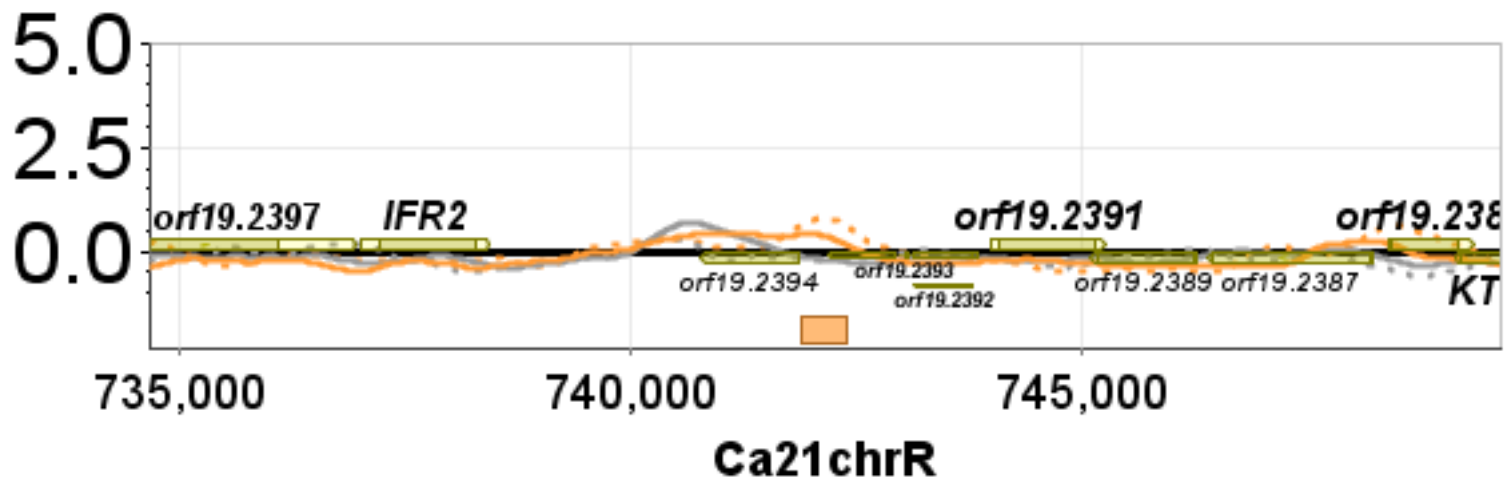

[0.792] Ca21chr2:1600104-1615103 [+] [ntar\_437, GDH2, PRS5, orf19.2191.1, orf19.2191]

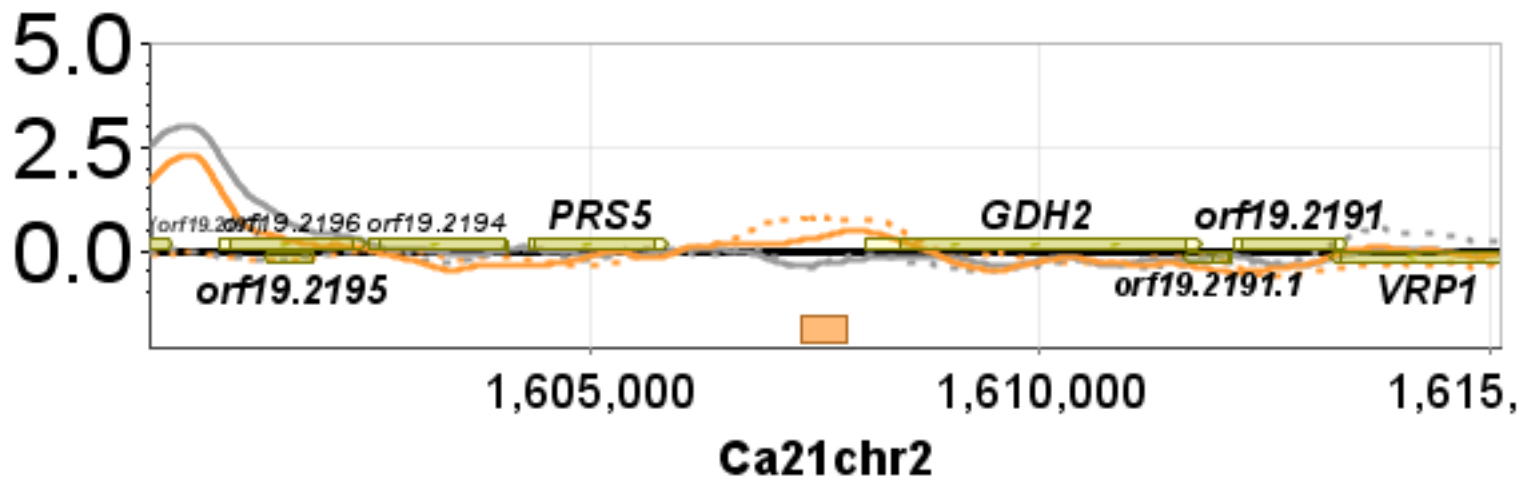

[0.792] Ca21chrR:1679295-1694294 [+] [ntar\_1347, YHB1, orf19.3706, PTC6, orf19.3704.1]

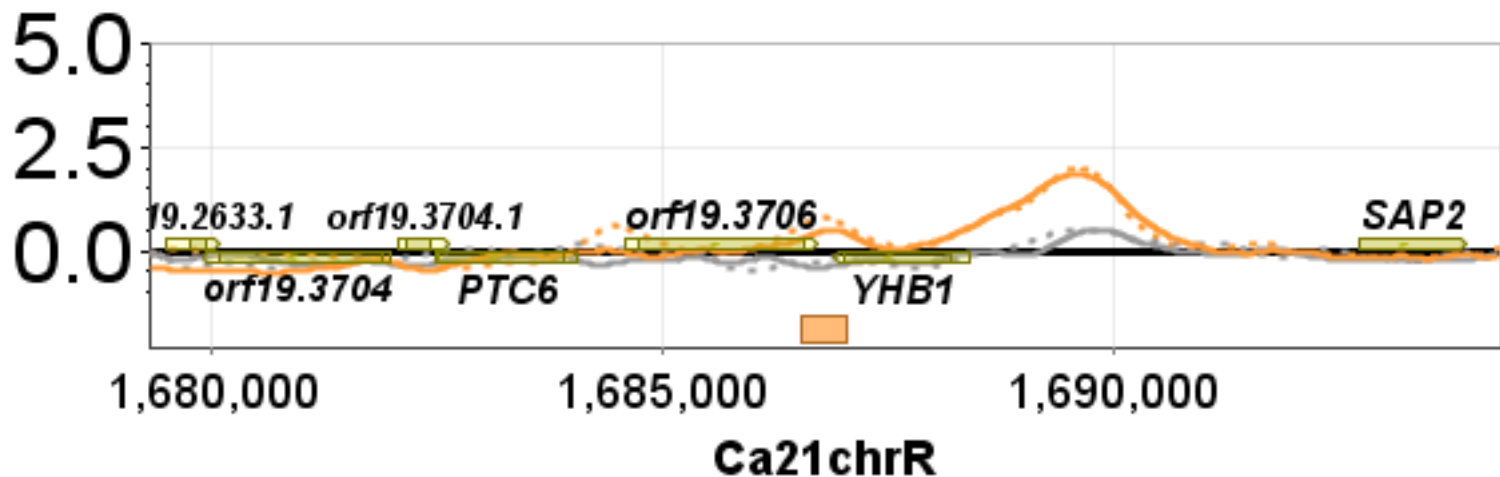

[0.791] Ca21chr3:144113-159112 [+] [ntar\_535, ntar\_536, MIH1, orf19.5376, HOS2]

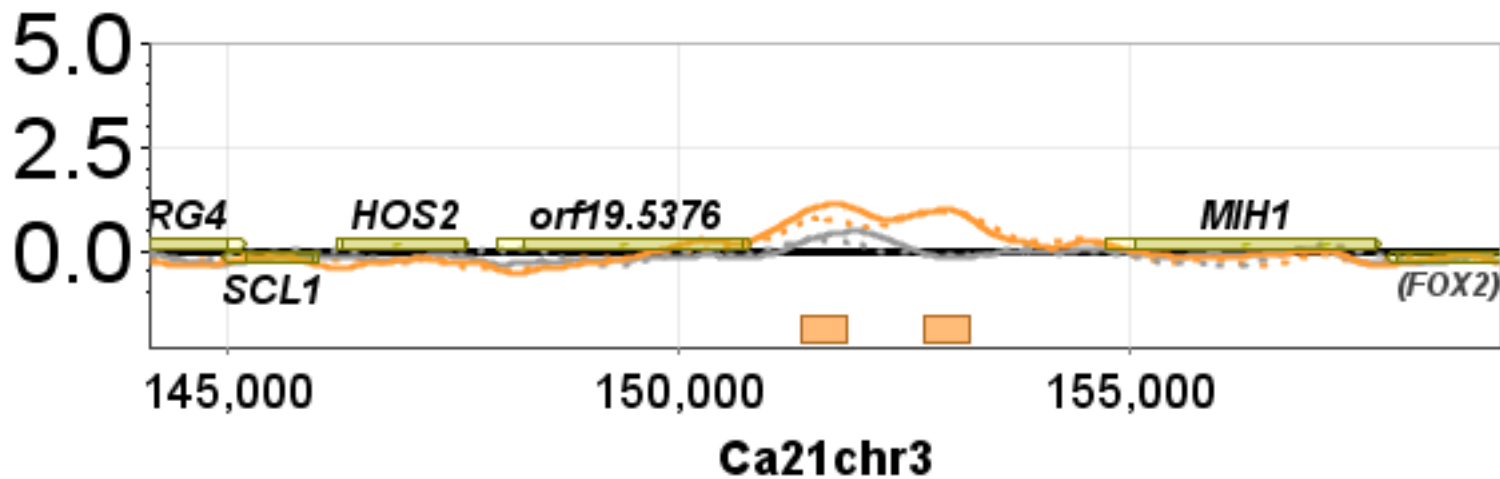

[0.789] Ca21chr5:300585-315584 [+] [CFL5, SNM1, CFL4, SEF2, orf19.1933]

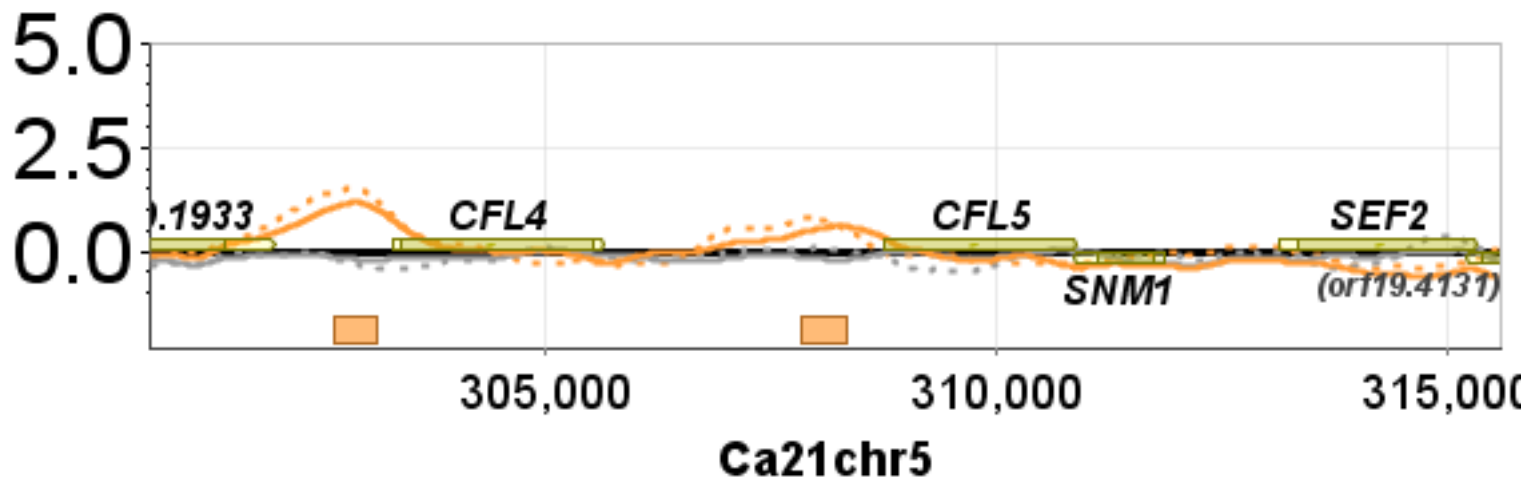

[0.789] Ca21chrR:874741-889740 [+] [ntar\_1253, ntar\_1254, ntar\_1255, HST7, ntar\_1256]

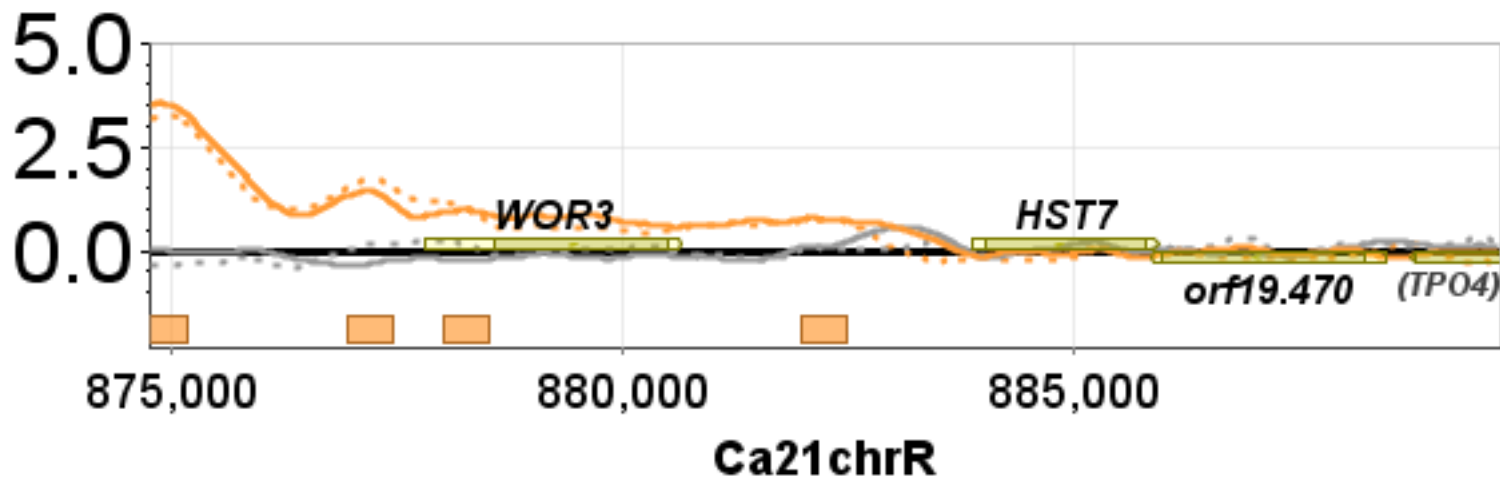

[0.788] Ca21chr1:660078-675077 [+] [ECM33, ntar\_67, ARO80, CDC12, orf19.3009]

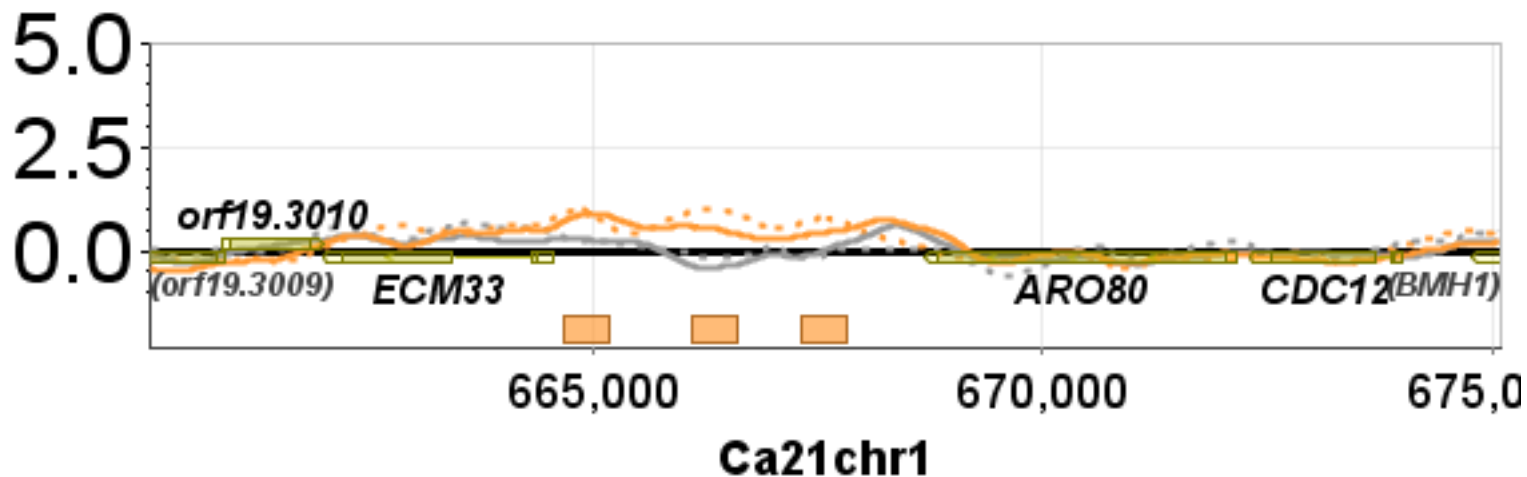

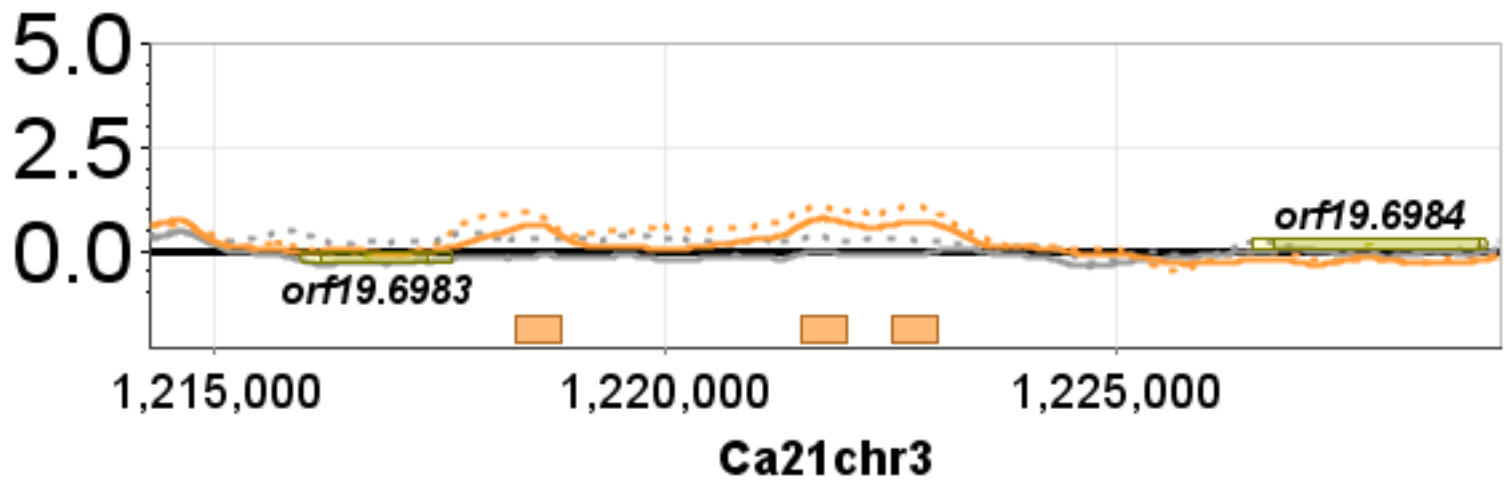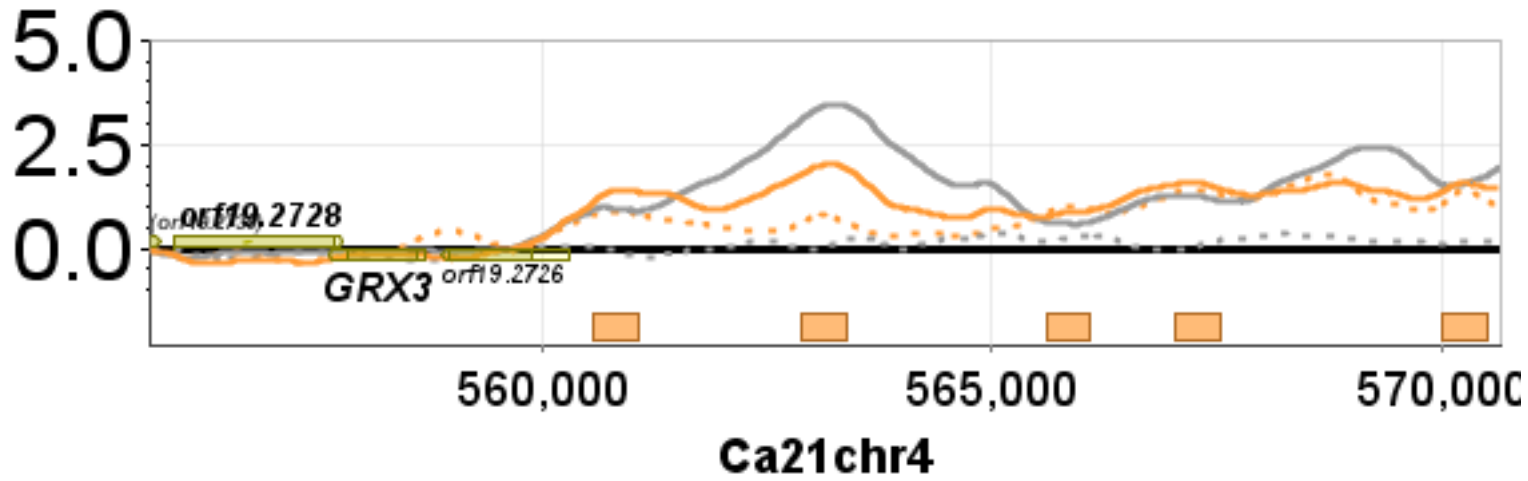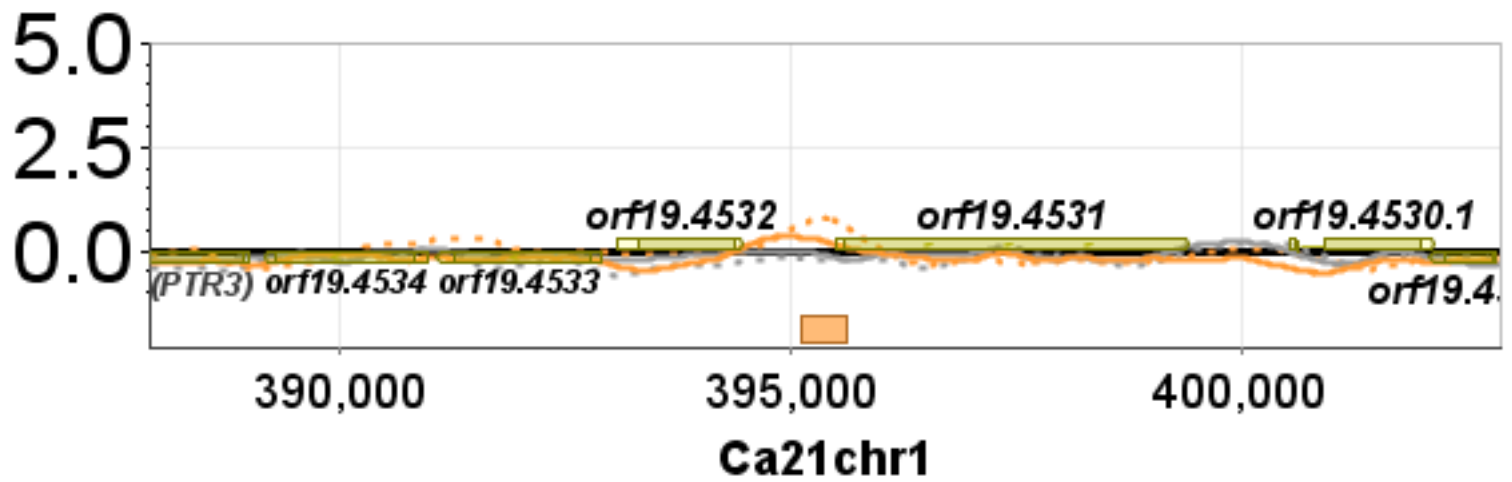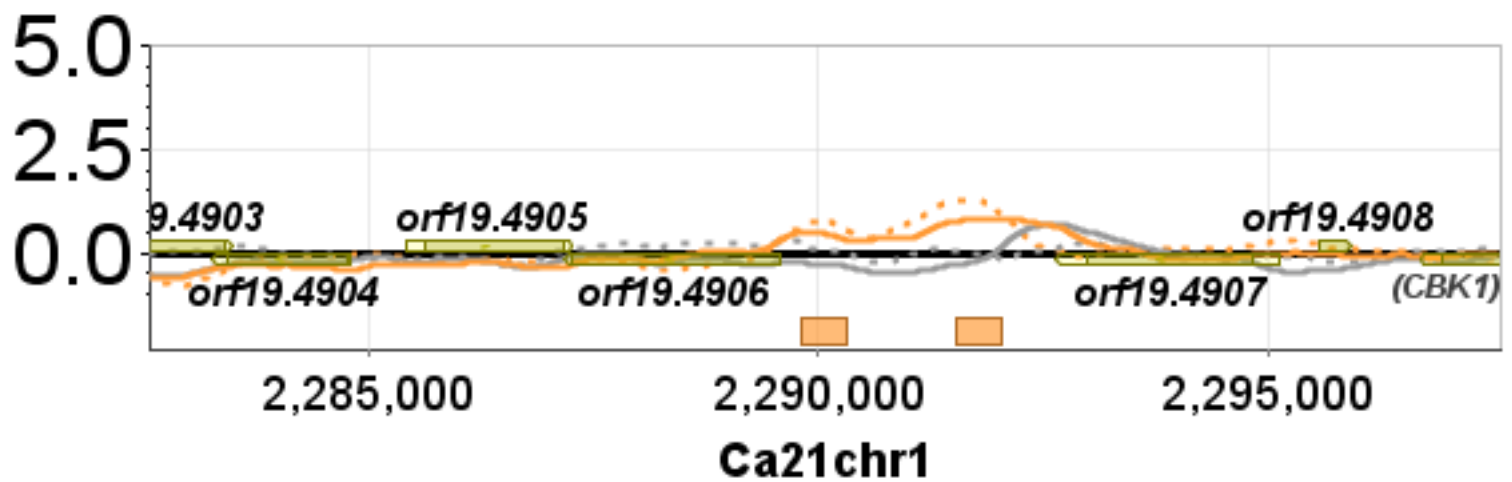

[0.778] Ca21chr1:166708-181707 [+] [orf19.6017, orf19.6016, LRO1, ntar\_17, RRS1]

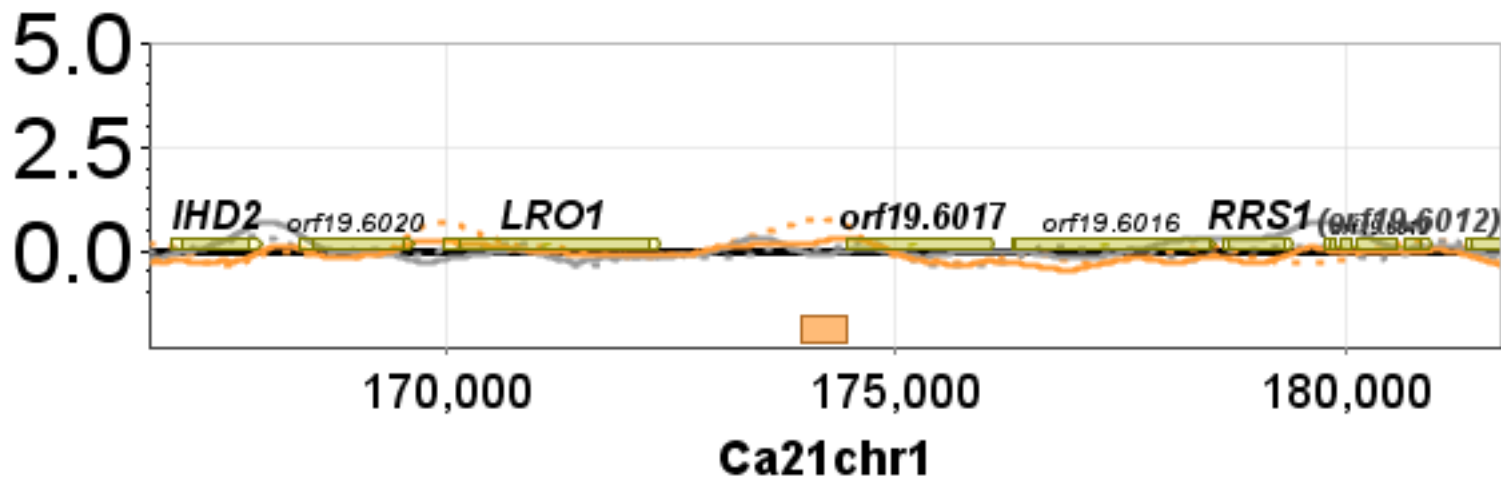

[0.777] Ca21chr2:903635-918634 [+] [SUV3, orf19.4518, orf19.4520, orf19.4517, ntar\_367]

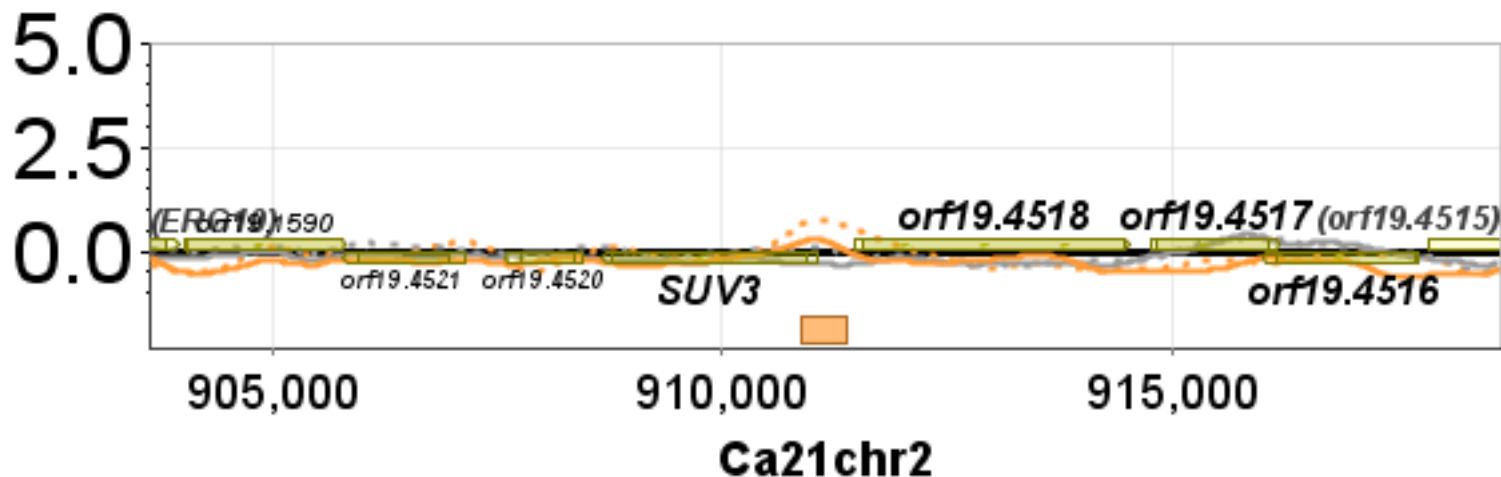

[0.777] Ca21chr3:1640615-1655614 [+] [ntar\_677, BMT1, orf19.6781, ntar\_676, MET8]

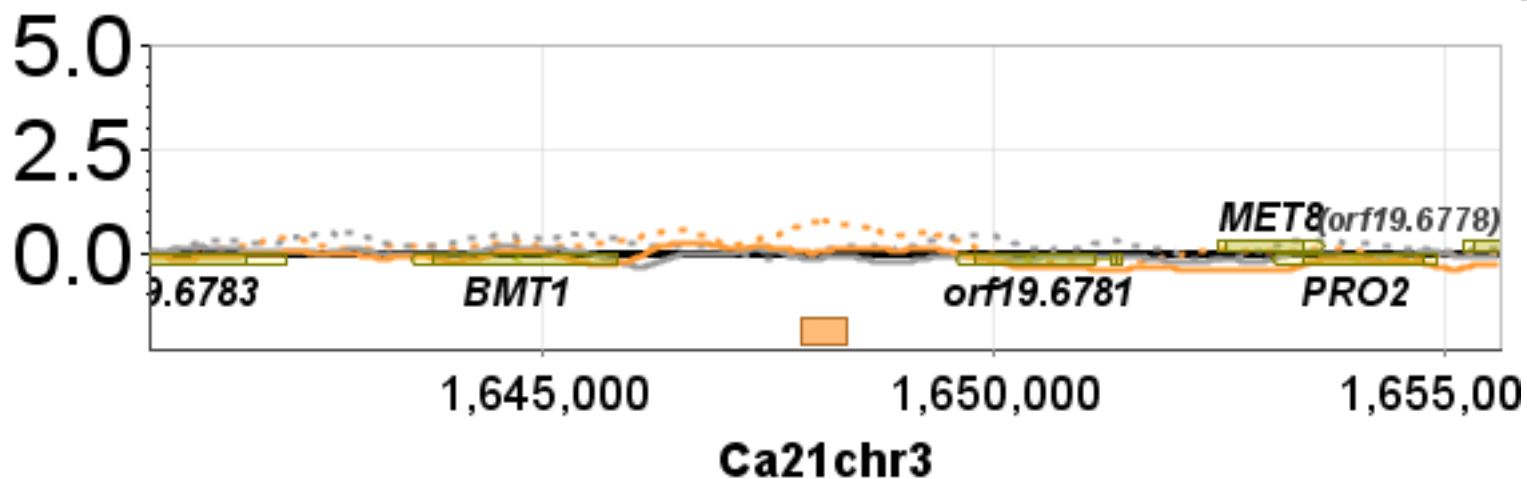

[0.771] Ca21chrR:1138471-1153470 [+] [ntar\_1283, orf19.5289, orf19.5288.1, ntar\_1284, orf19.1012]

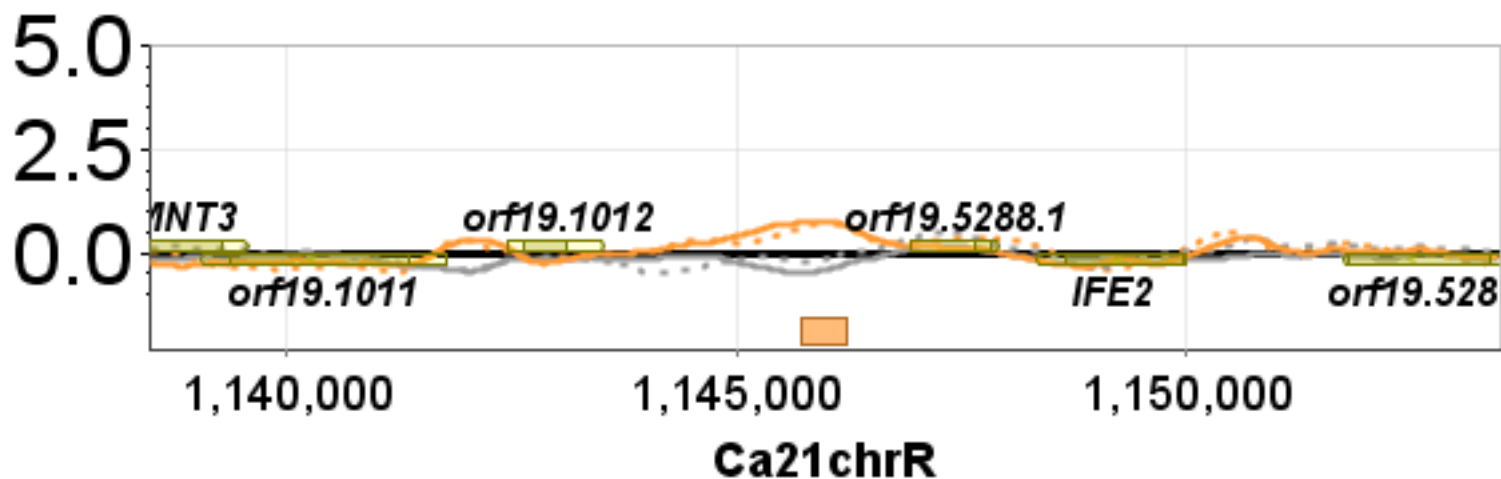

[0.769] Ca21chr4:393520-408519 [+] [CAT2, RFX2, HSX11, ntar\_751]

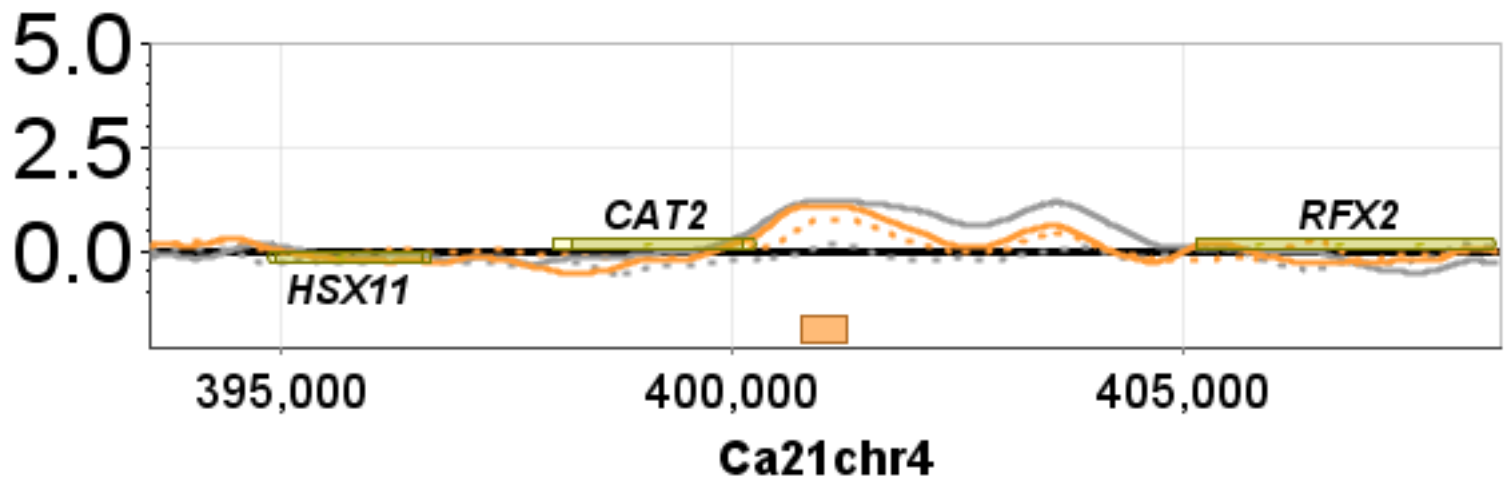

[0.764] Ca21chrR:815310-830309 [+] [orf19.4368, SMC1, orf19.4369, orf19.4366, ntar\_1250]

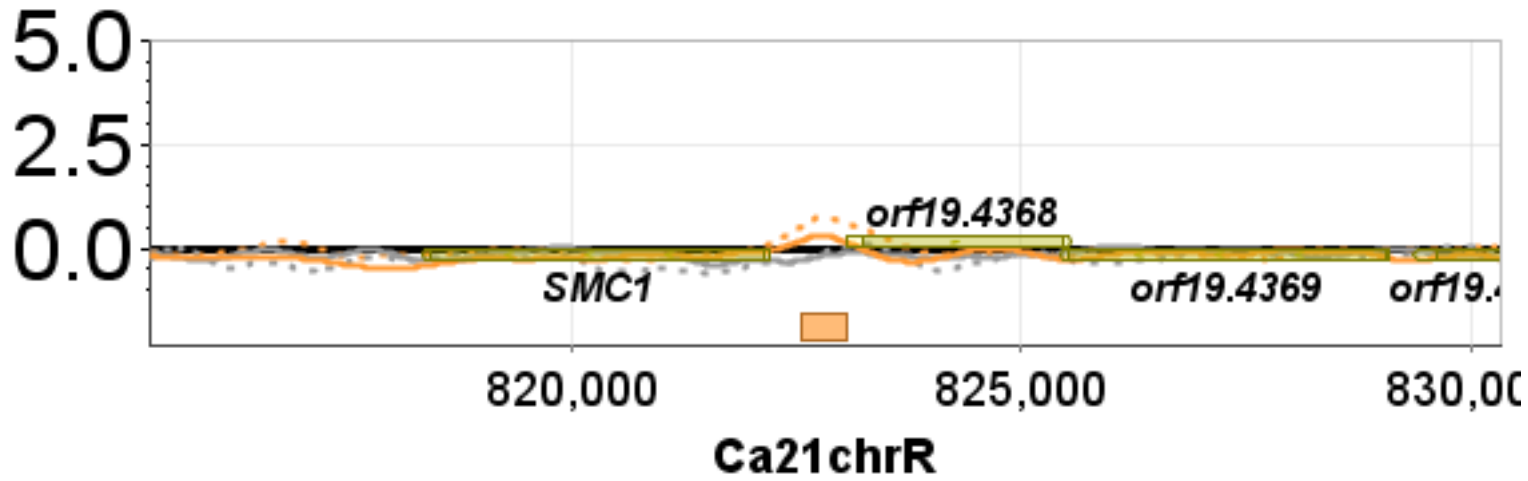

[0.76] Ca21chr1:2246761-2261760 [+] [ntar\_208, CLA4, TPK1, orf19.4889, orf19.4893]

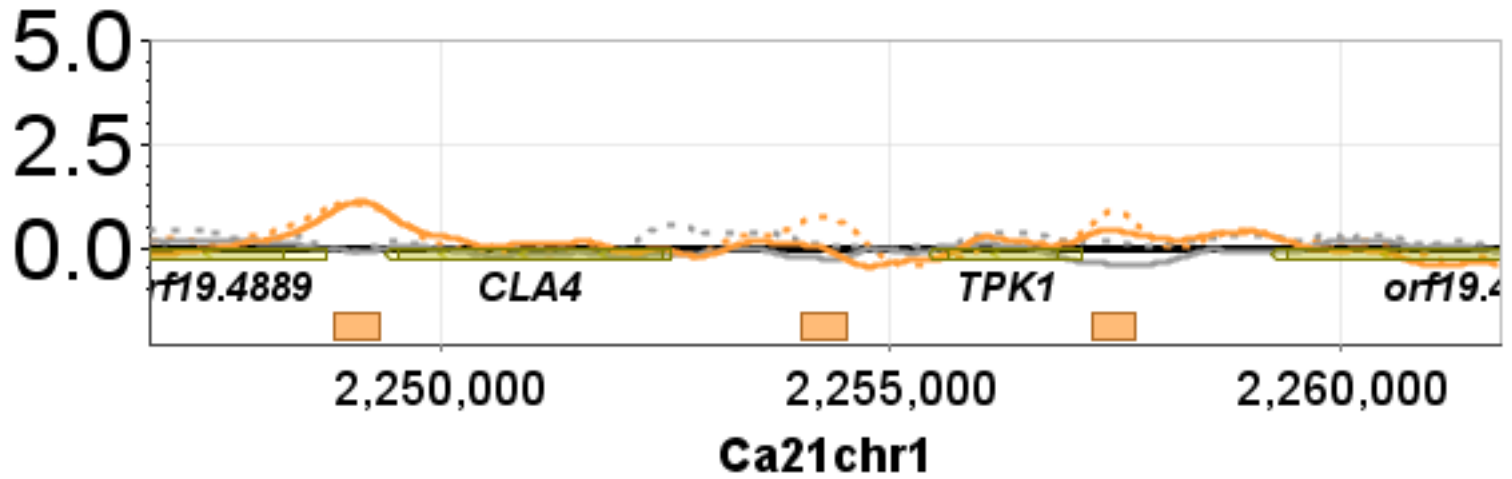

[0.759] Ca21chr1:1737886-1752885 [+] [NRP1, orf19.5070, ntar\_166, ntar\_165, DPM1]

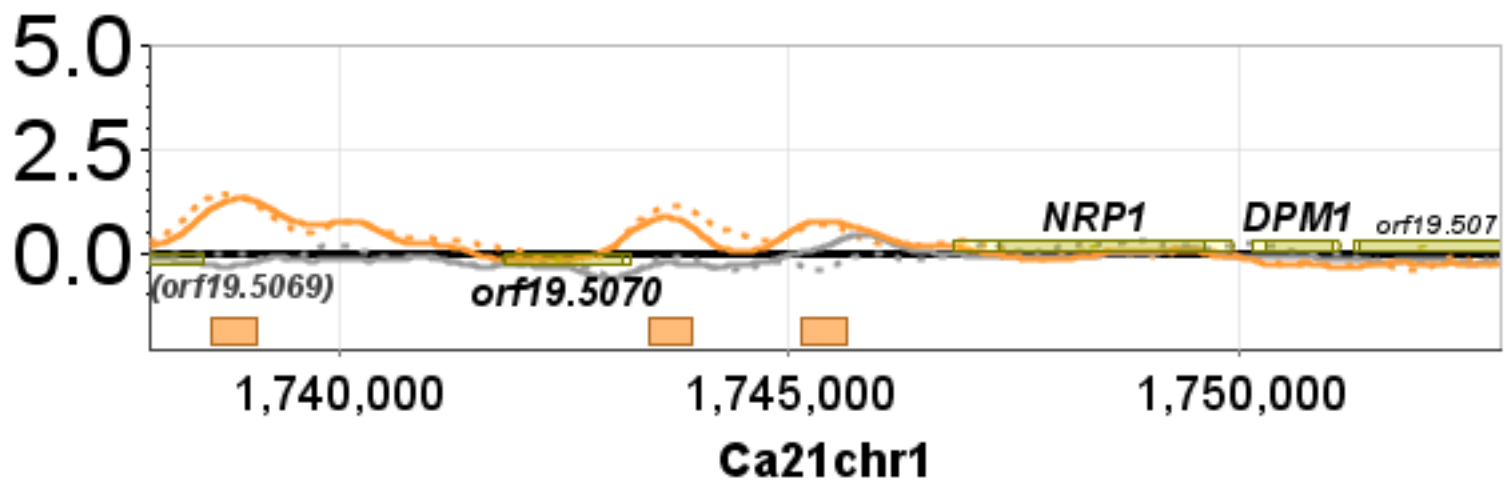



[0.759] Ca21chr3:789983-804982 [+] [PTR2, RAD53, MEU1, ntar\_597, orf19.6940]

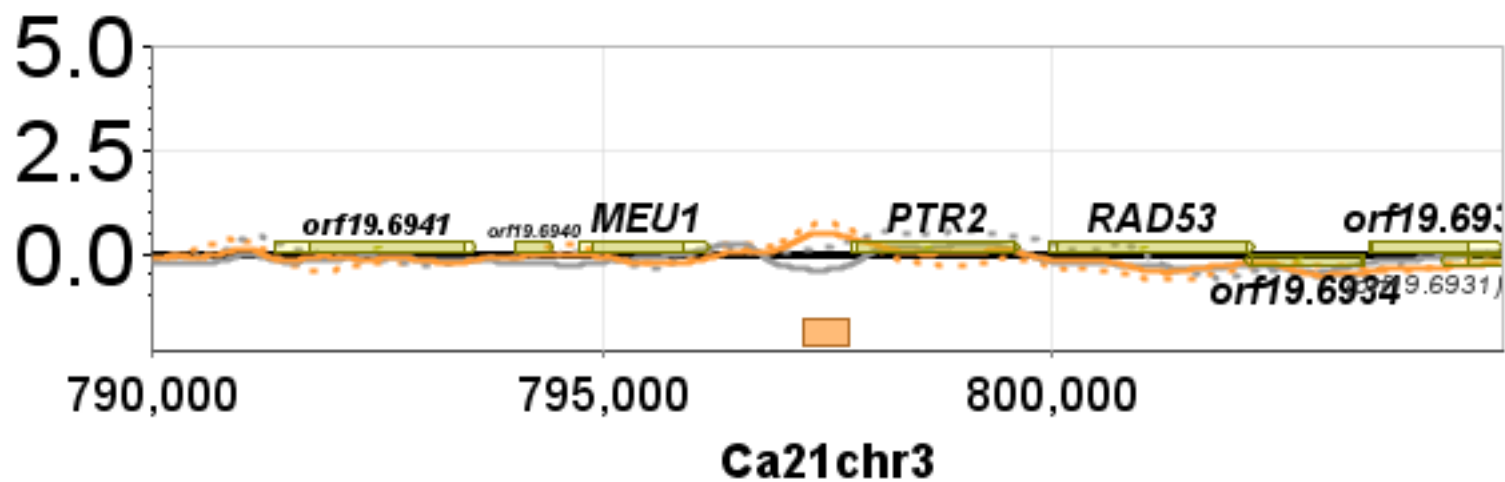

[0.758] Ca21chr3:1237339-1252338 [+] [orf19.6992, PRE3, orf19.6990, ntar\_635, orf19.6989]

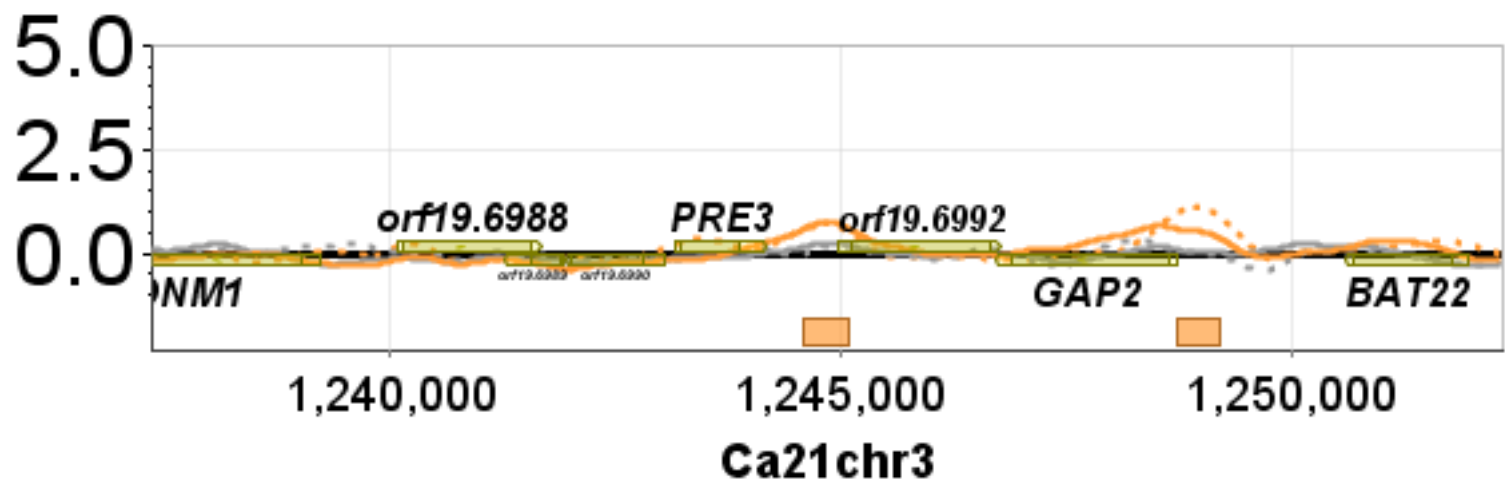

[0.757] Ca21chr2:1464031-1479030 [+] [TPK2, orf19.2278, orf19.2276, orf19.2275, orf19.2280]

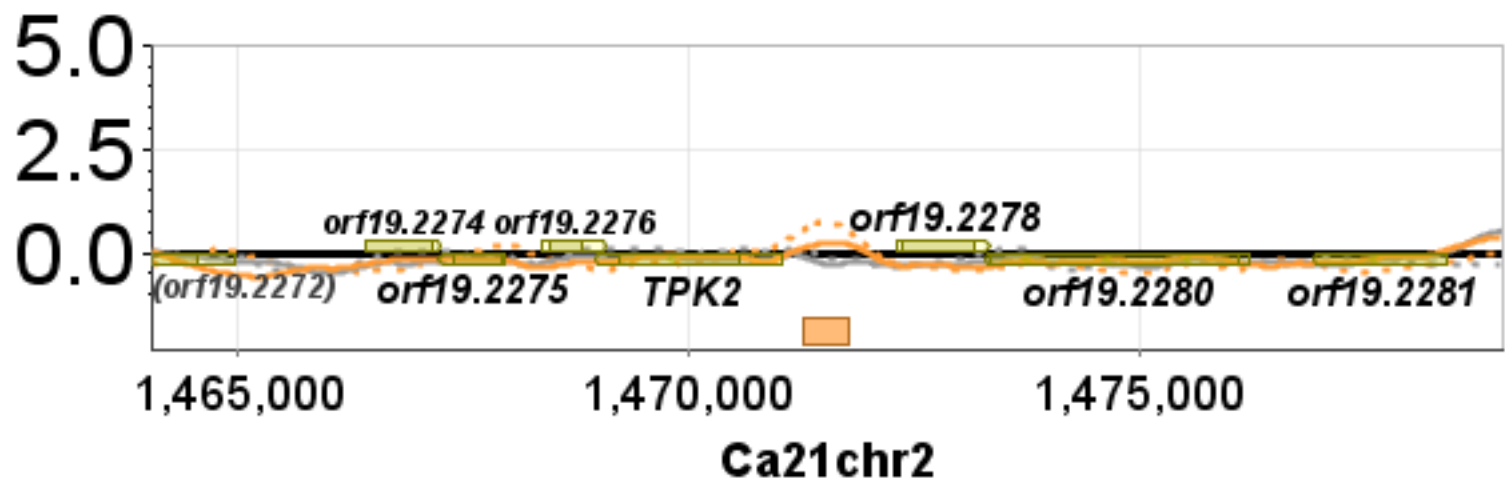

[0.756] Ca21chr5:272525-287524 [+] [GPR1, AUR1, orf19.1943, orf19.1946, SGE1]

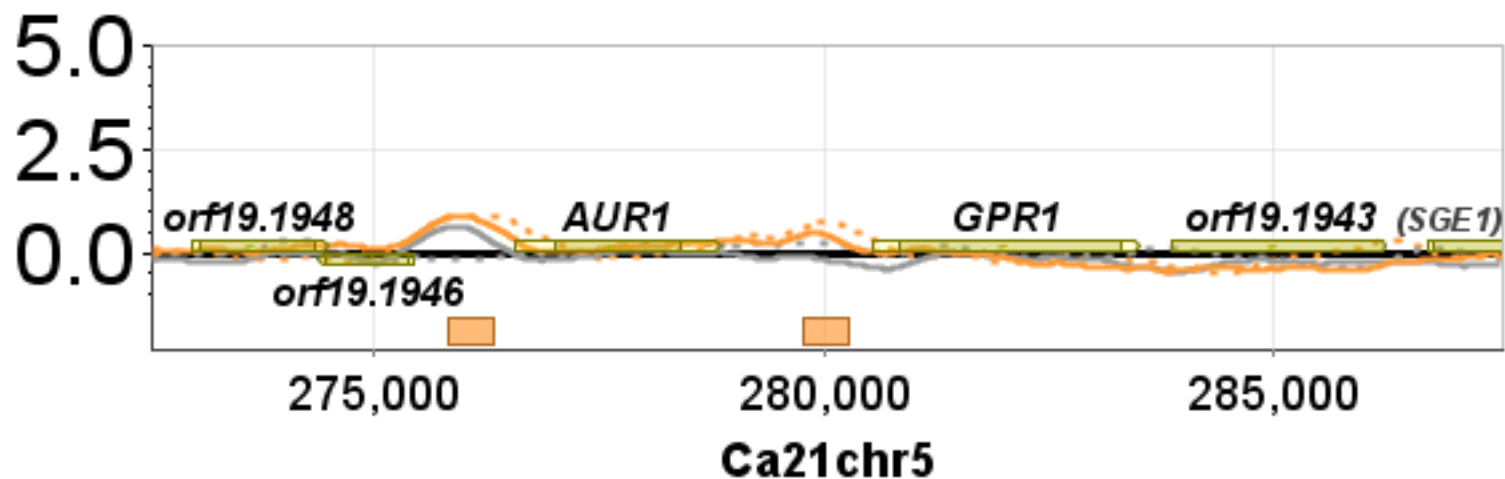

[0.755] Ca21chr1:2057991-2072990 [+] [ntar\_196, orf19.4799, orf19.4798, RIM20, orf19.4796]

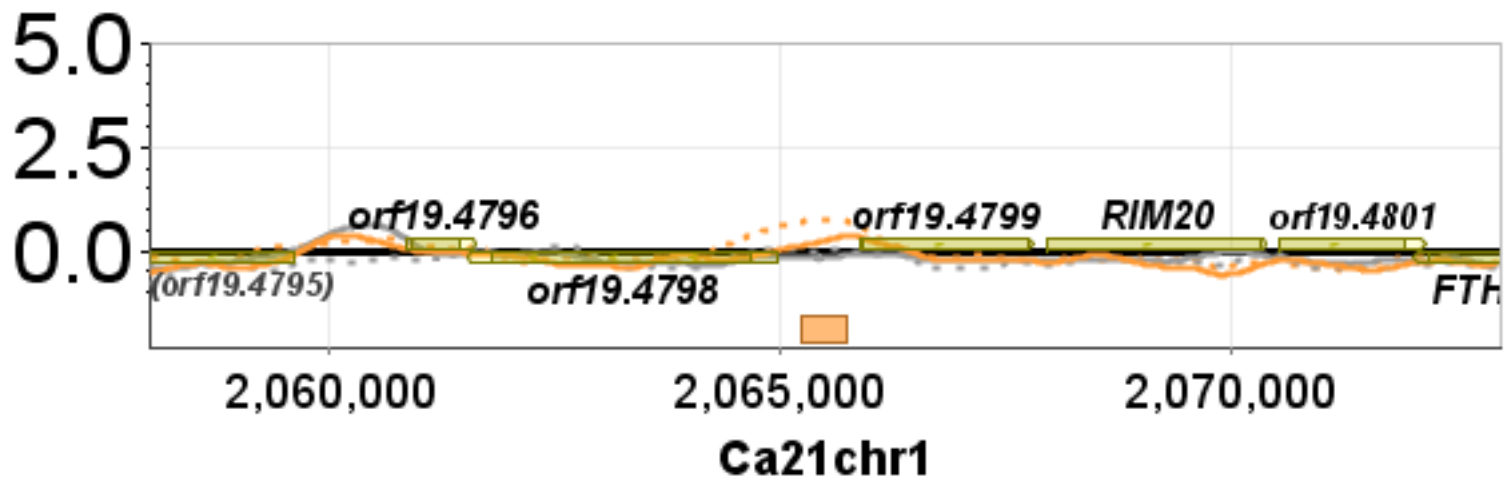

[0.744] Ca21chr3:557403-572402 [+] [SLC1, orf19.251, ntar\_572, orf19.252, orf19.254]

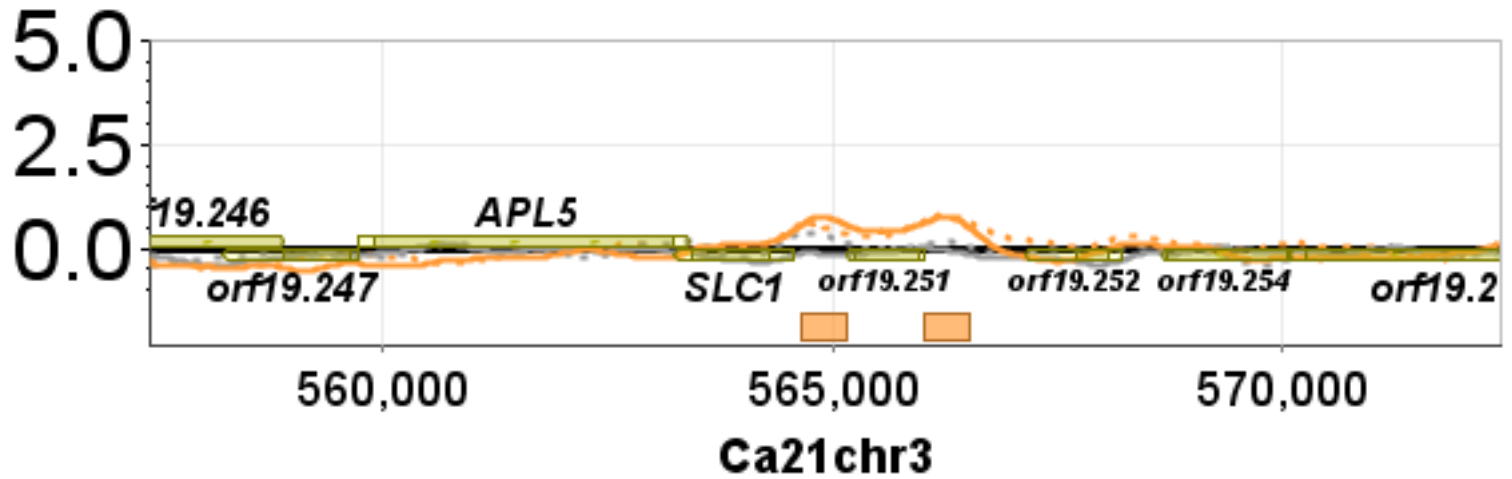

[0.744] Ca21chr6:549515-564514 [+] [ntar\_1009, orf19.5541, SAP6, orf19.5539, orf19.5543]

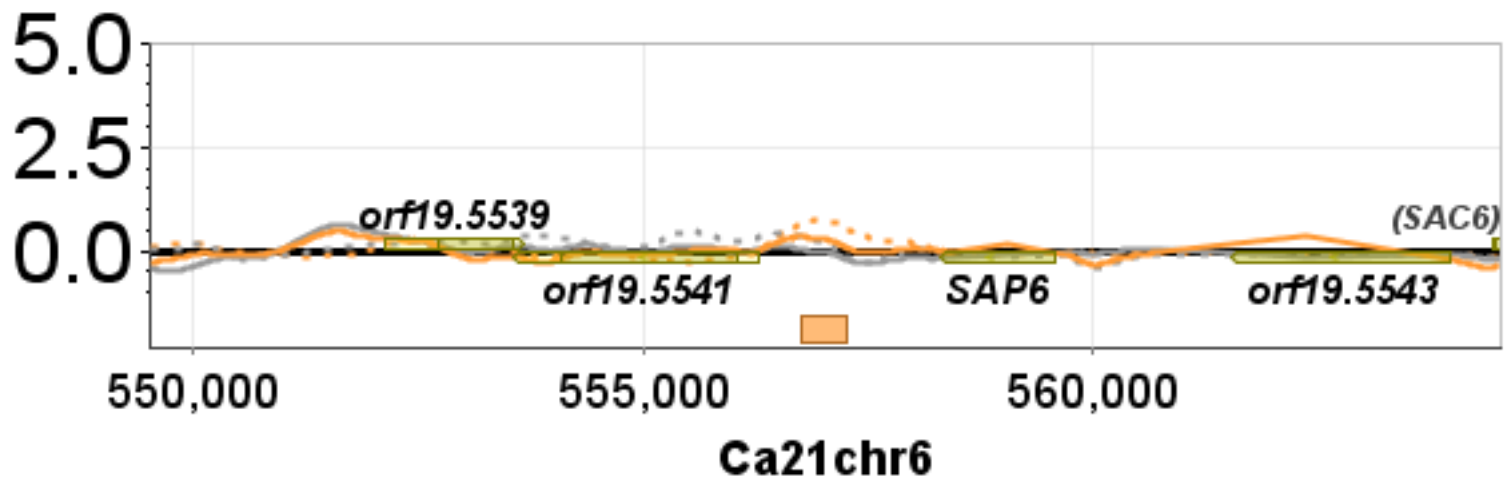

[0.737] Ca21chr2:601228-616227 [+] [orf19.5799, ntar\_340, LIG4, RNR21, PI-PLC]

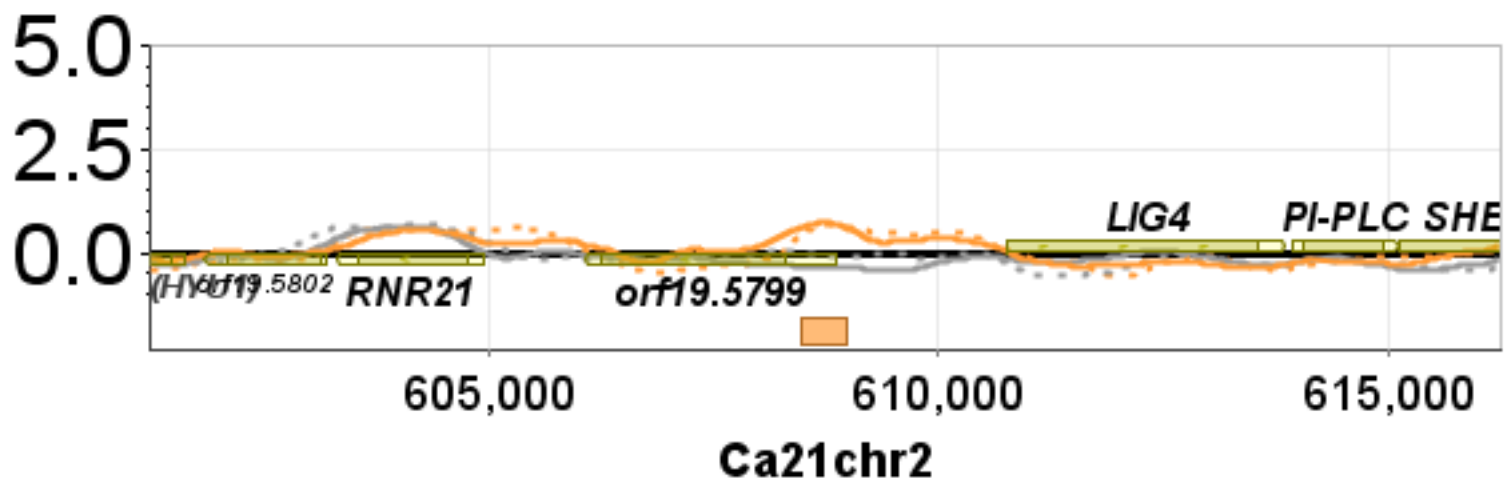

[0.737] Ca21chr6:156503-171502 [+] [GPX2, CAN3, orf19.86, ntar\_974, GPX1]

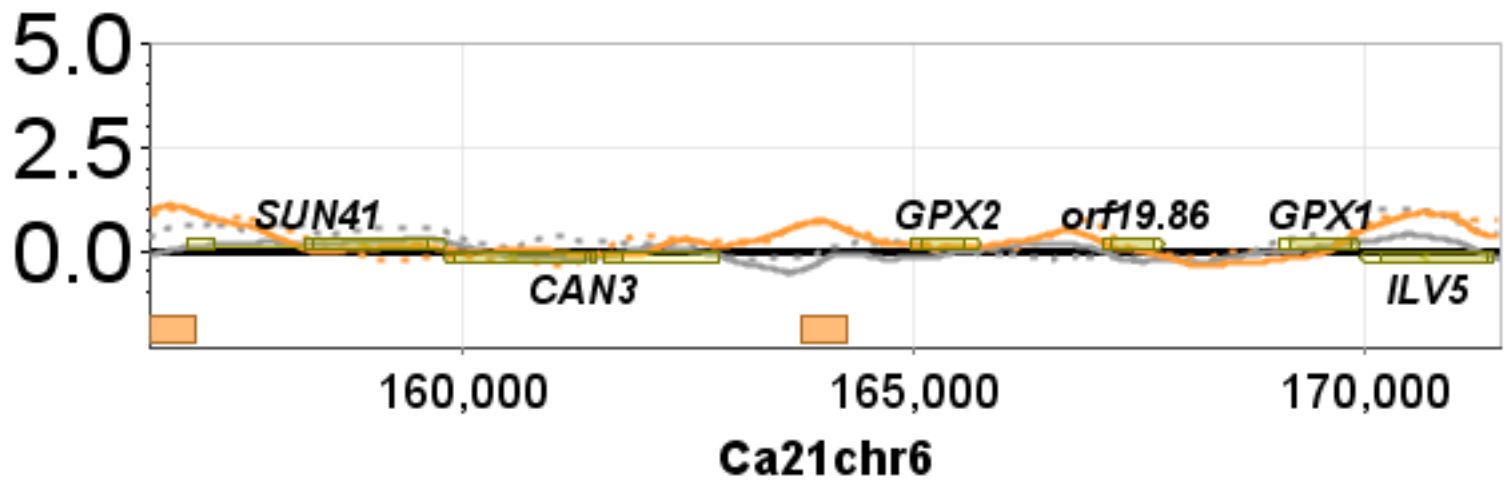

[0.736] Ca21chrR:1406947-1421946 [+] [ntar\_1311, ntar\_1312, ntar\_1314, ntar\_1313, ntar\_1310]

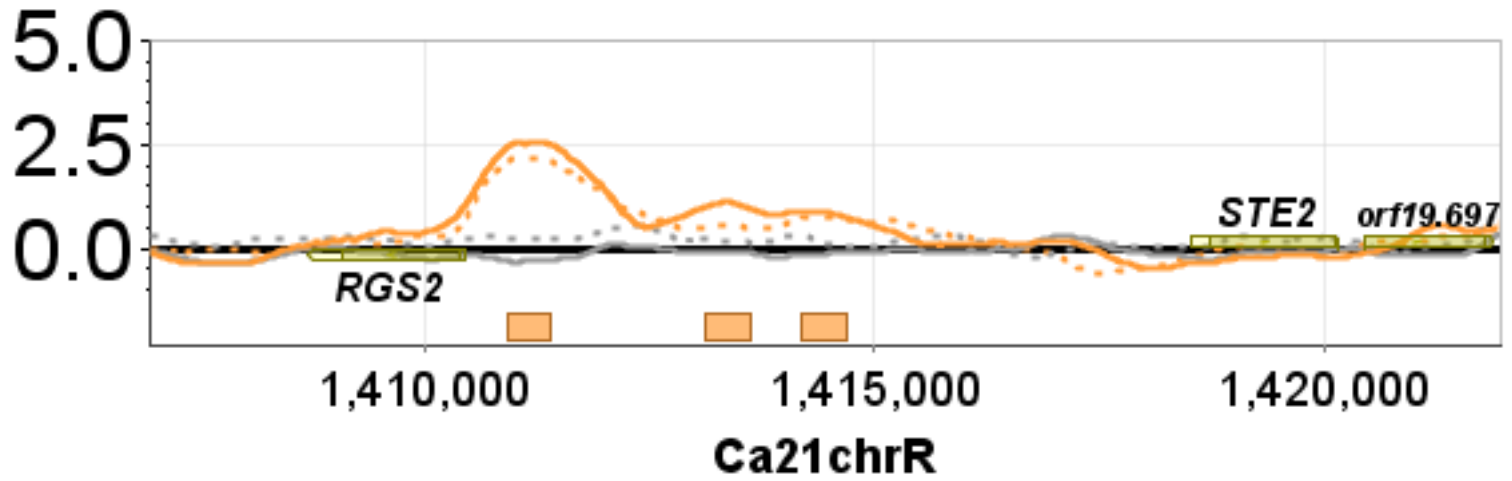

[0.729] Ca21chrR:2097947-2112946 [+] [DEF1, FGR46, YTA6, orf19.7556, orf19.7554]

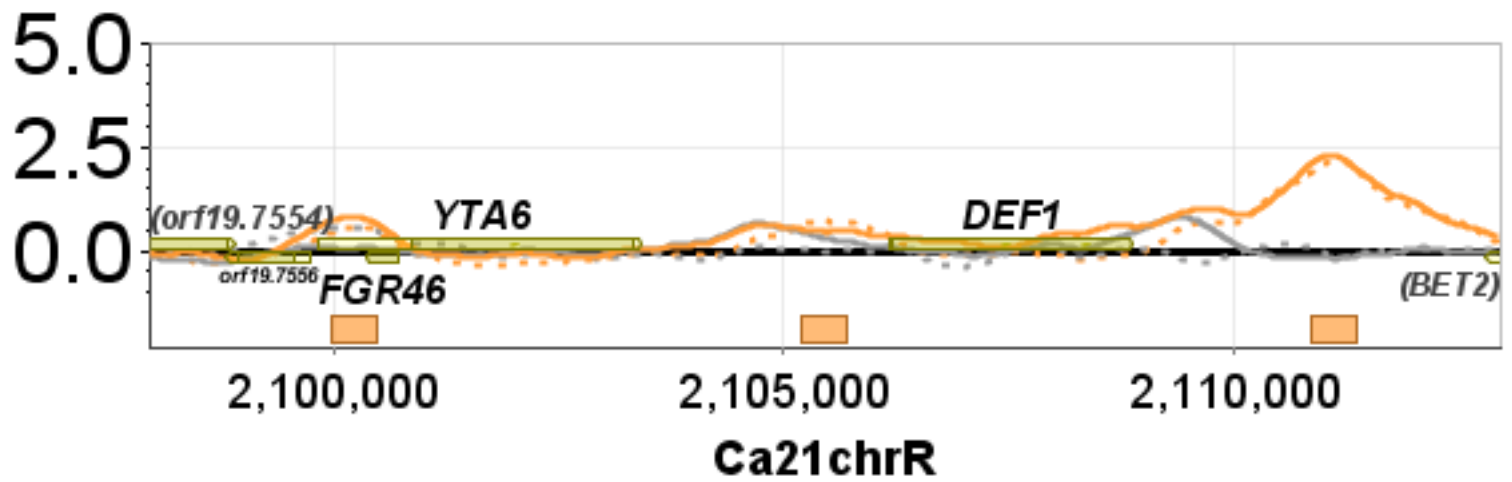

[0.728] Ca21chr1:295611-310610 [+] [orf19.3338, SOD2, orf19.3337, orf19.3341, orf19.3342]

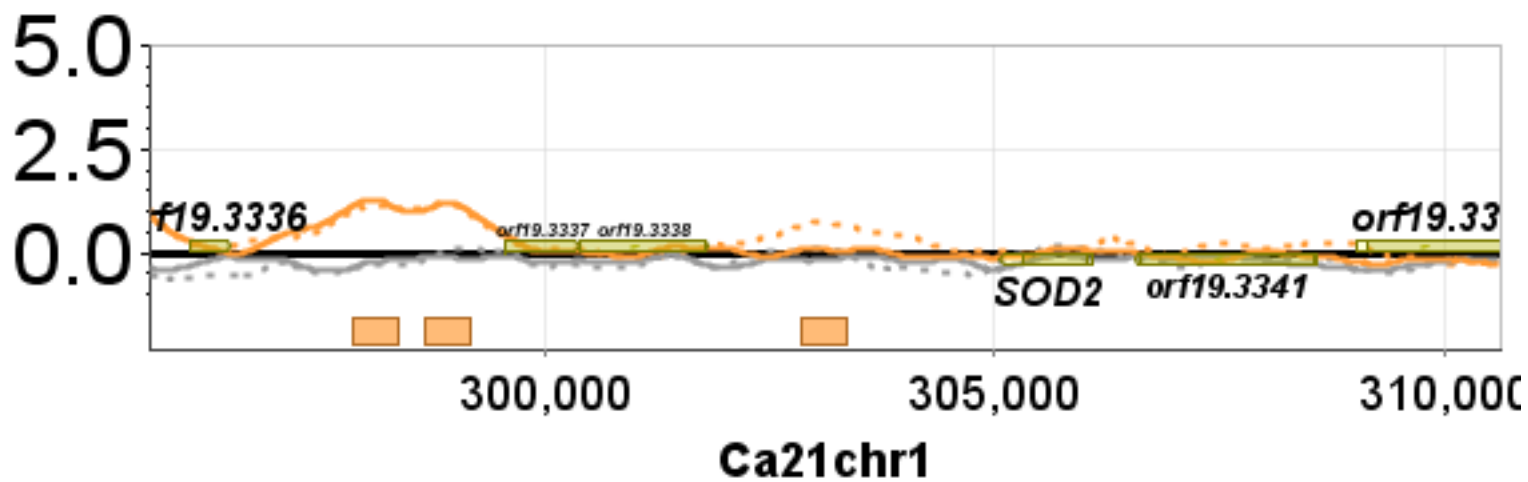

[0.722] Ca21chr1:1316527-1331526 [+] [orf19.1821, UME6]

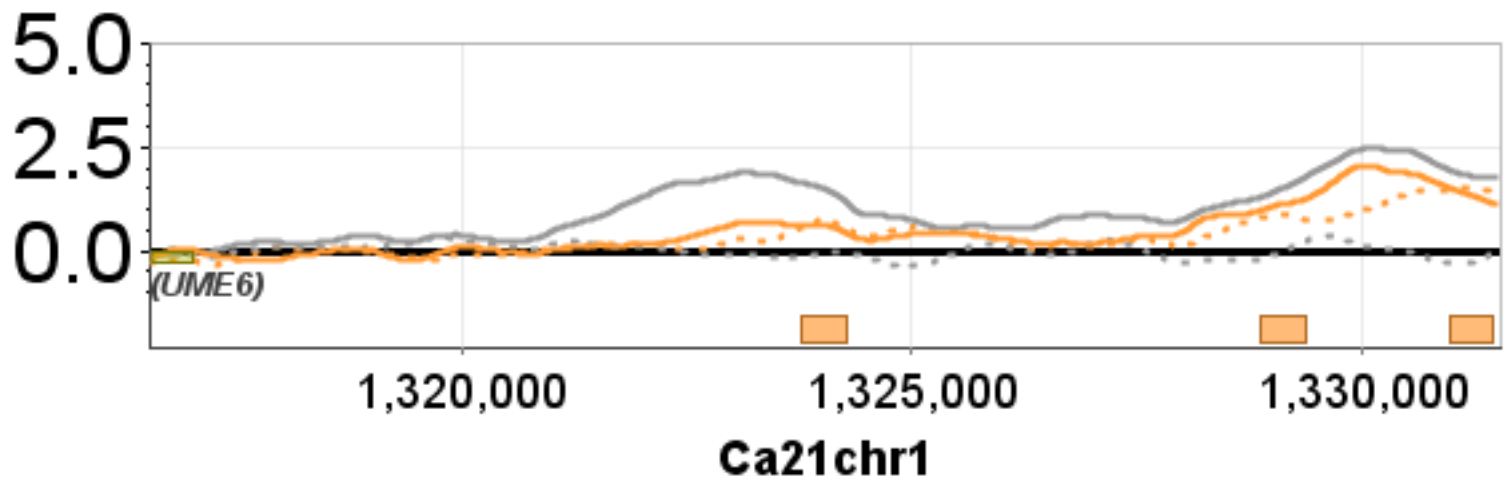

[0.721] Ca21chrR:1669569-1684568 [+] [HGT14, CDC45, ntar\_1346, orf19.2633.1, ARO2]

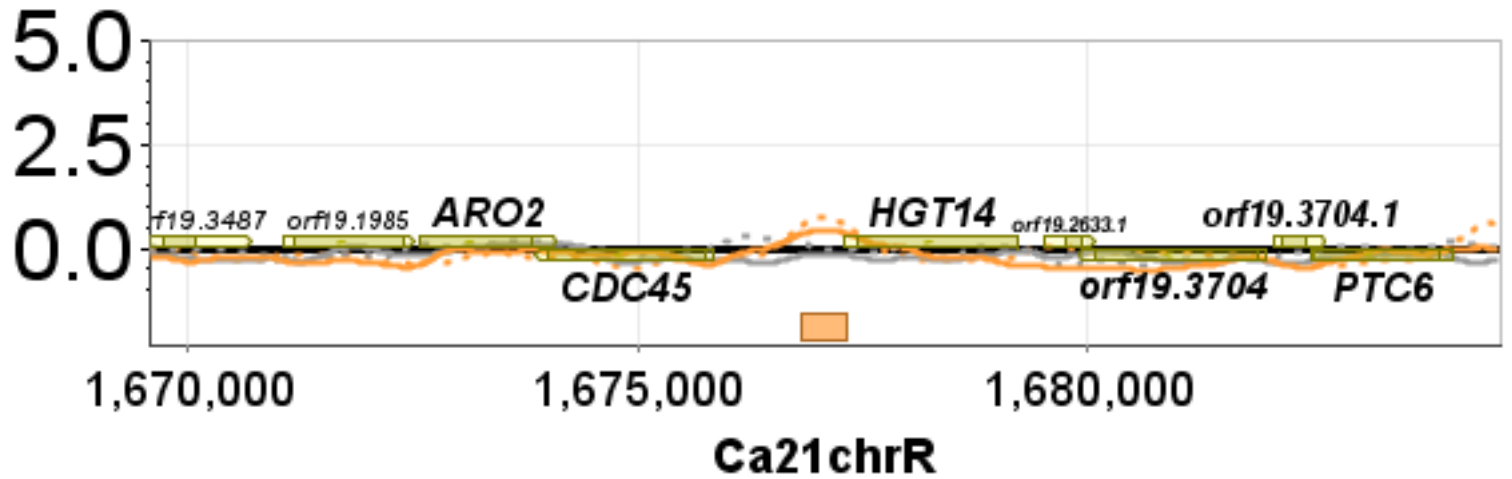

[0.718] Ca21chr3:1598550-1613549 [+] [SSN6, POS5, RPD31, orf19.6802, HUT1]

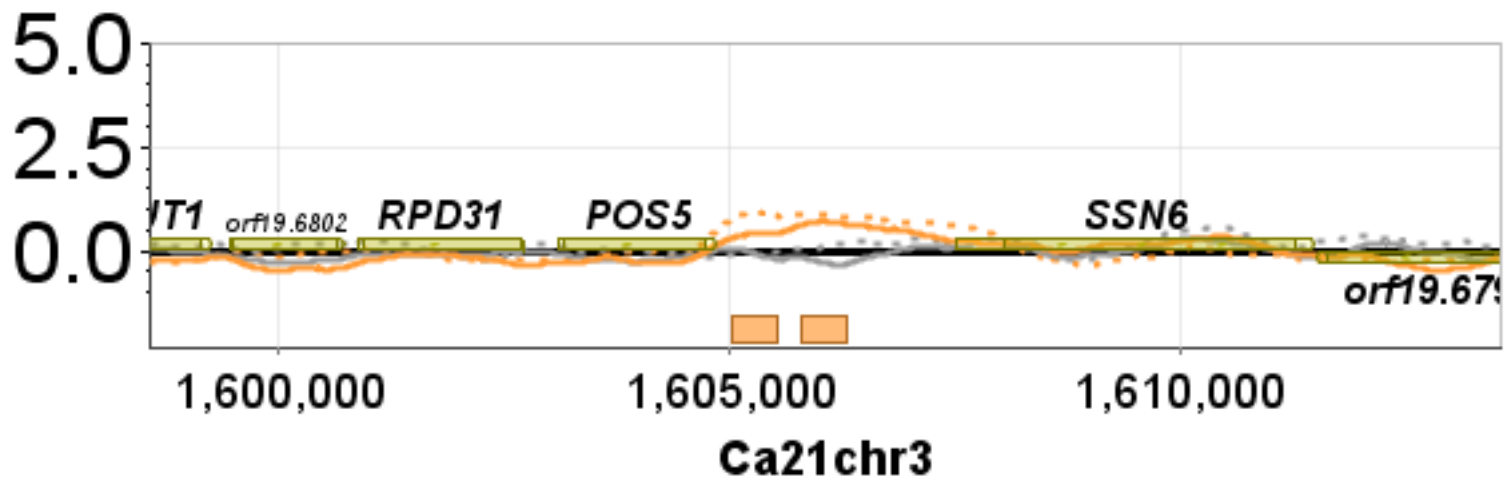

[0.716] Ca21chr1:2985496-3000495 [+] [orf19.4998, ntar\_267, ntar\_266, KIS2, CYB2]

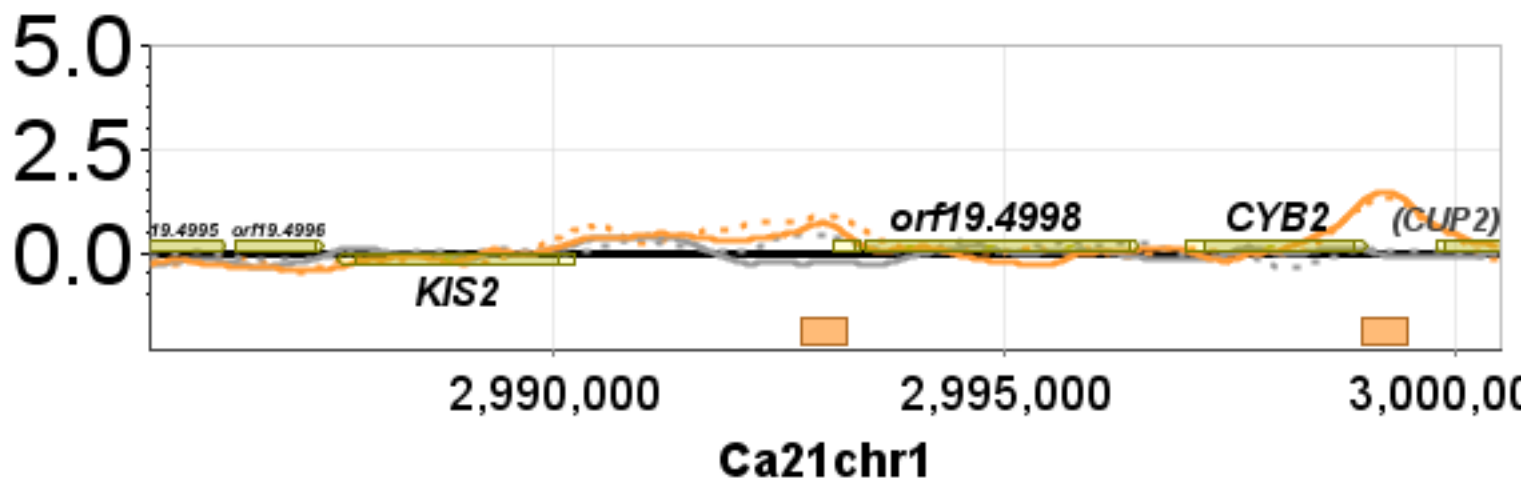

[0.715] Ca21chr5:777594-792593 [+] [GAP6, orf19.6658, DUR3, ntar\_919, orf19.6654]

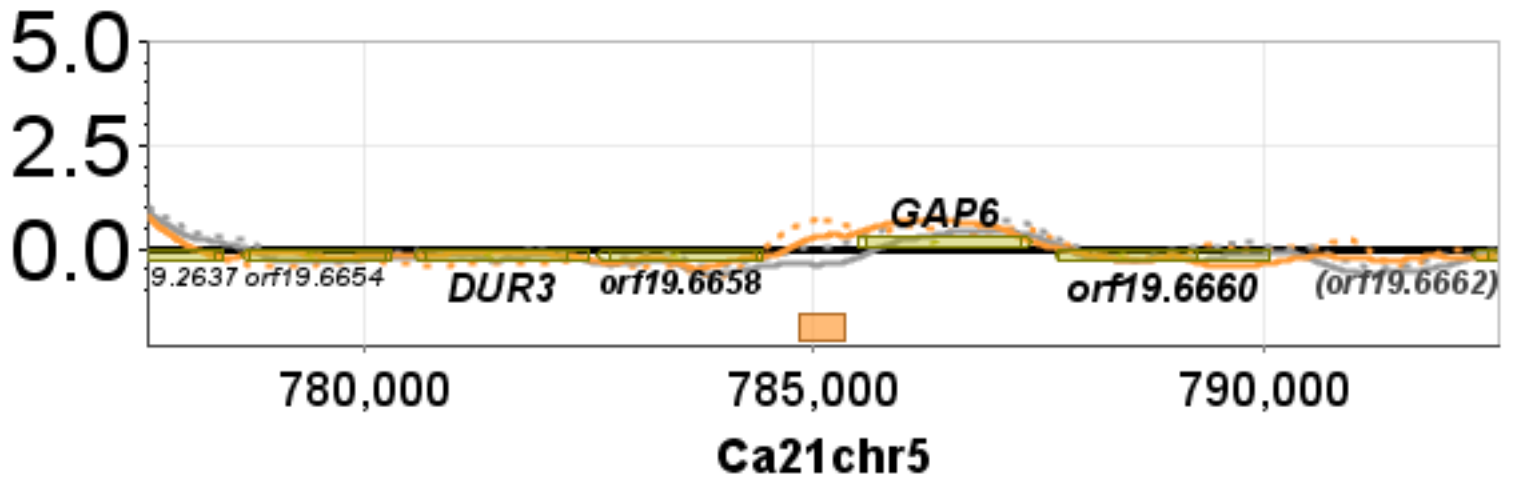

[0.713] Ca21chr3:98477-113476 [+] [NGT1, orf19.5393, ntar\_529, orf19.5391, orf19.5395]

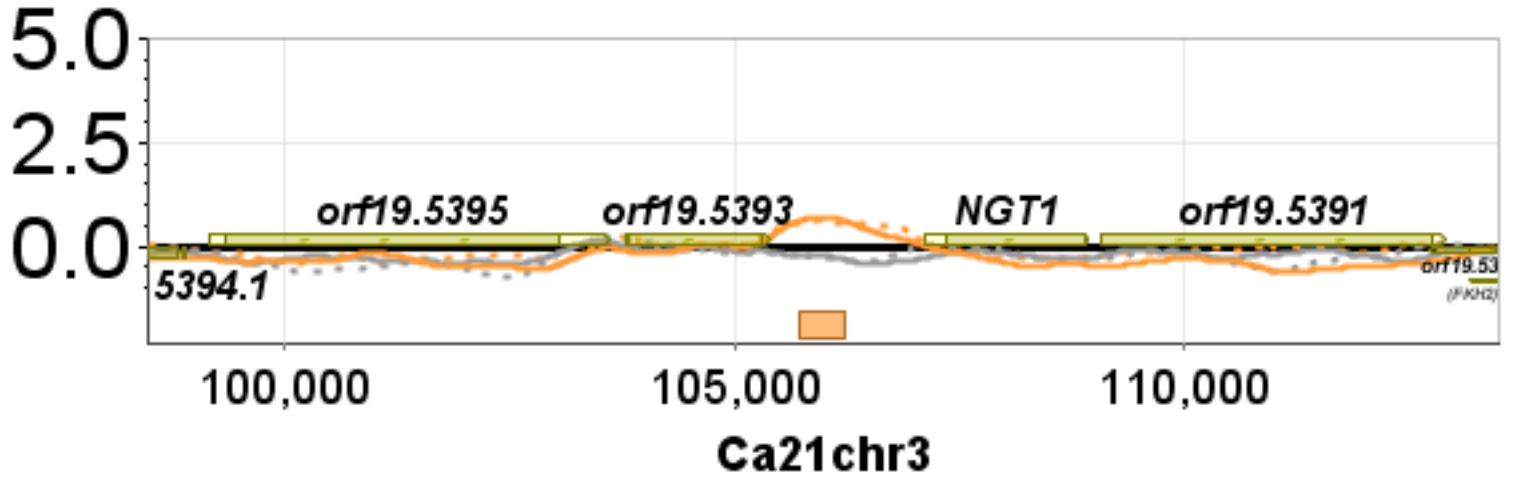

[0.708] Ca21chr1:1995880-2010879 [+] [ntar\_190, ntar\_189, ntar\_188, AOX2, SSU81]

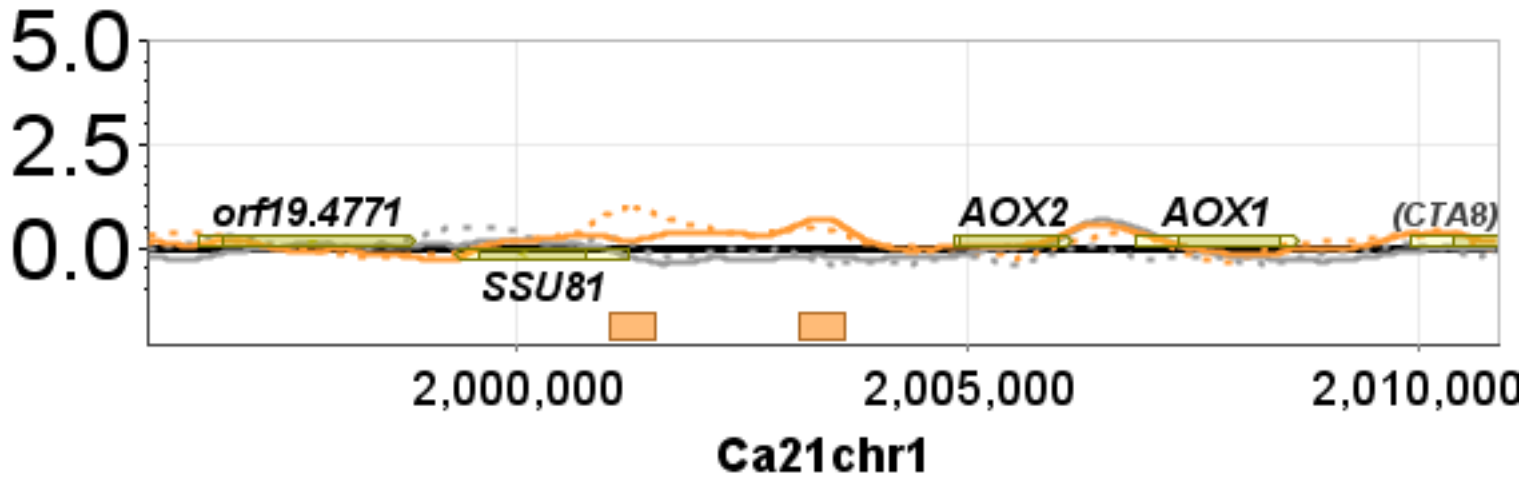

[0.706] Ca21chr2:1859110-1874109 [+] [ntar\_469, orf19.4070, IFF6, orf19.4069, ntar\_470]

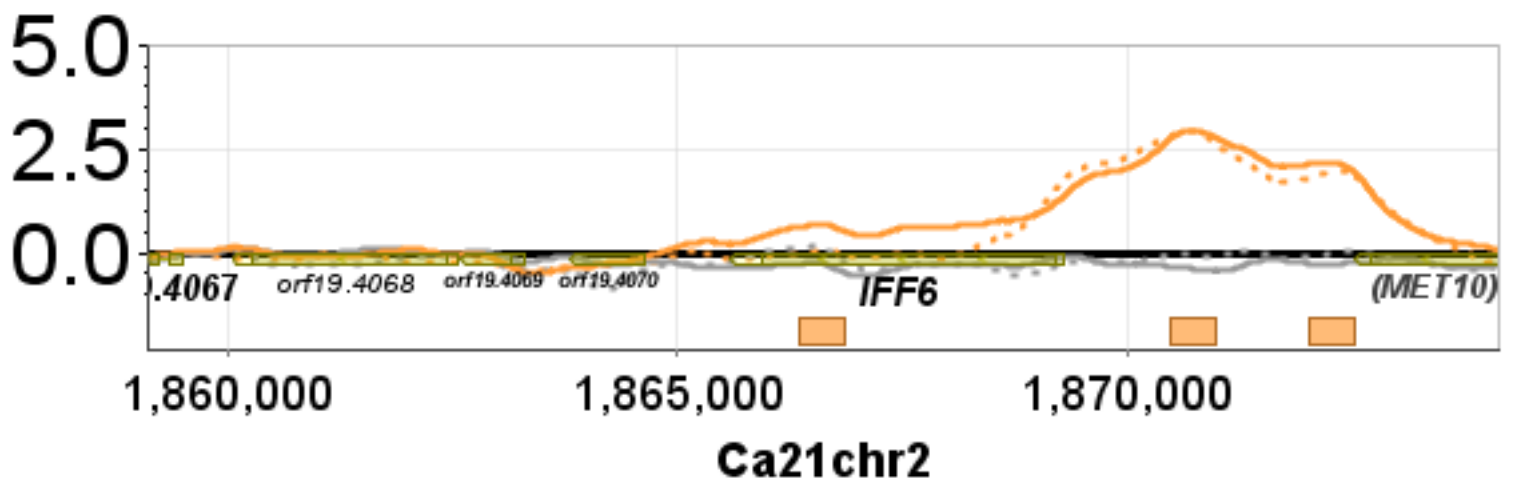

[0.697] Ca21chr5:591779-606778 [+] [ntar\_901, ntar\_902, orf19.4282, orf19.4281, orf19.4283]

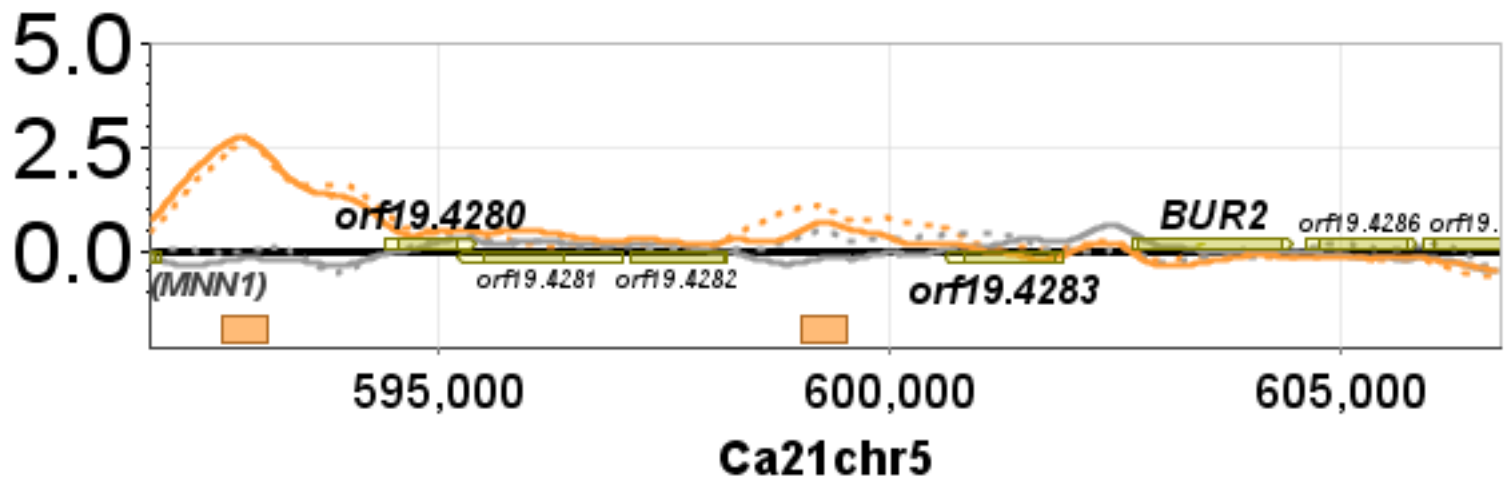

[0.694] Ca21chr5:198305-213304 [+] [GIT1, GIT2, GIT4, URA4, orf19.1975]

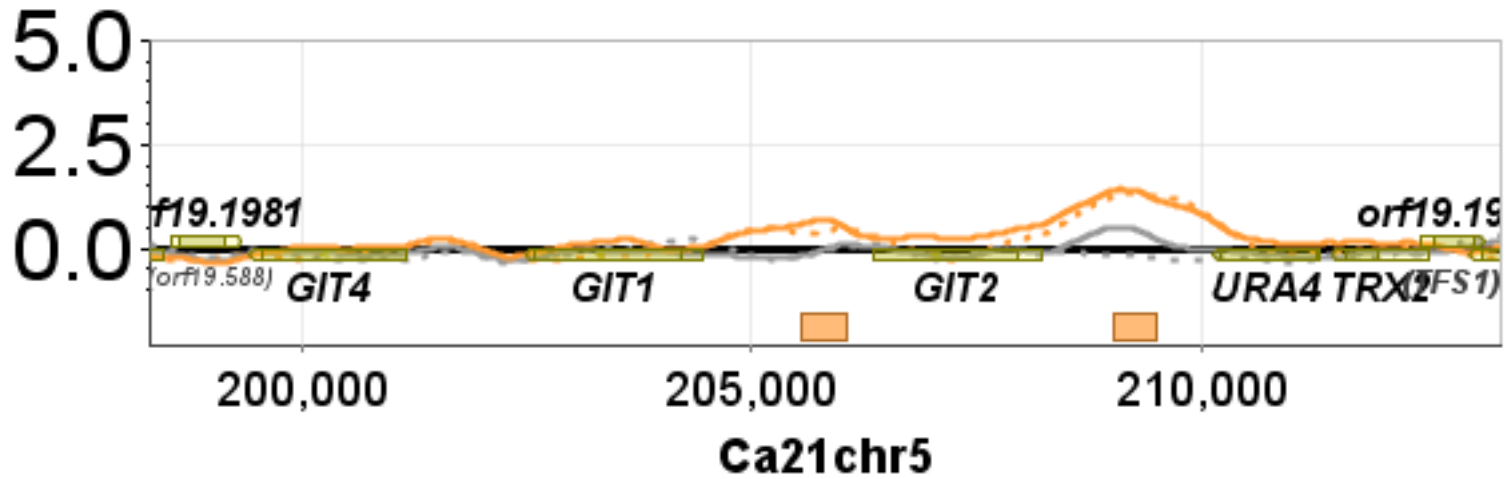

[0.693] Ca21chr3:950042-965041 [+] [orf19.5910, CMK1, MAK21, TEC1]

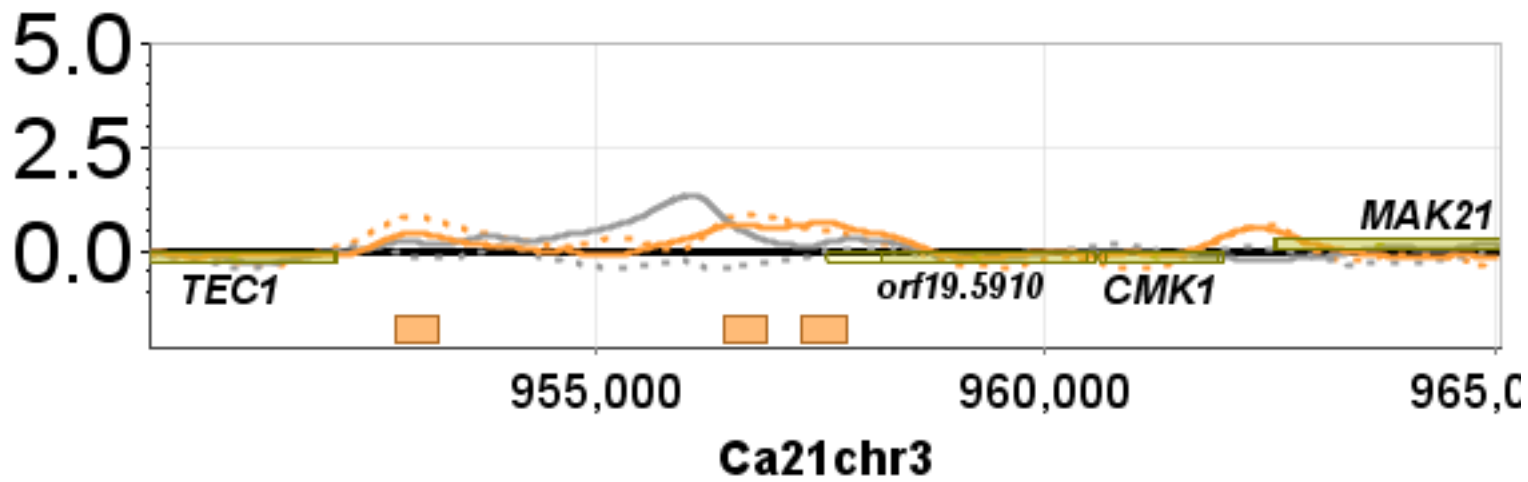

[0.685] Ca21chr2:1141953-1156952 [+] [orf19.6874, VPS35, ts(aga)4, orf19.6873.1, RPS8A]

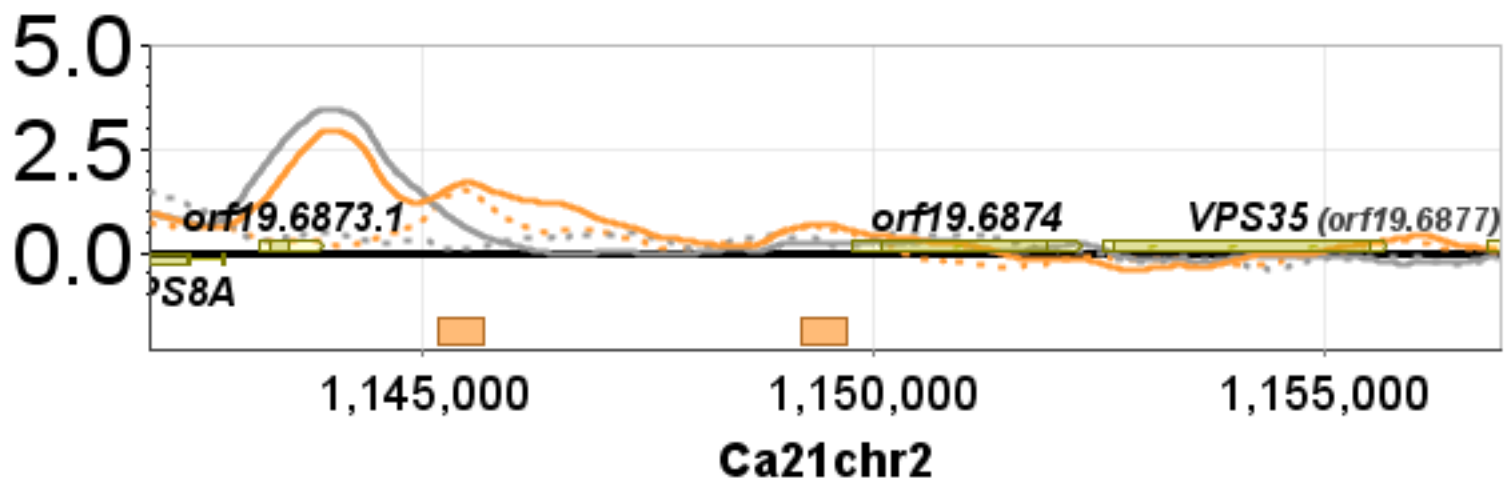

[0.682] Ca21chr5:744394-759393 [+] [PCL1, orf19.2647, orf19.2650.1, orf19.2646]

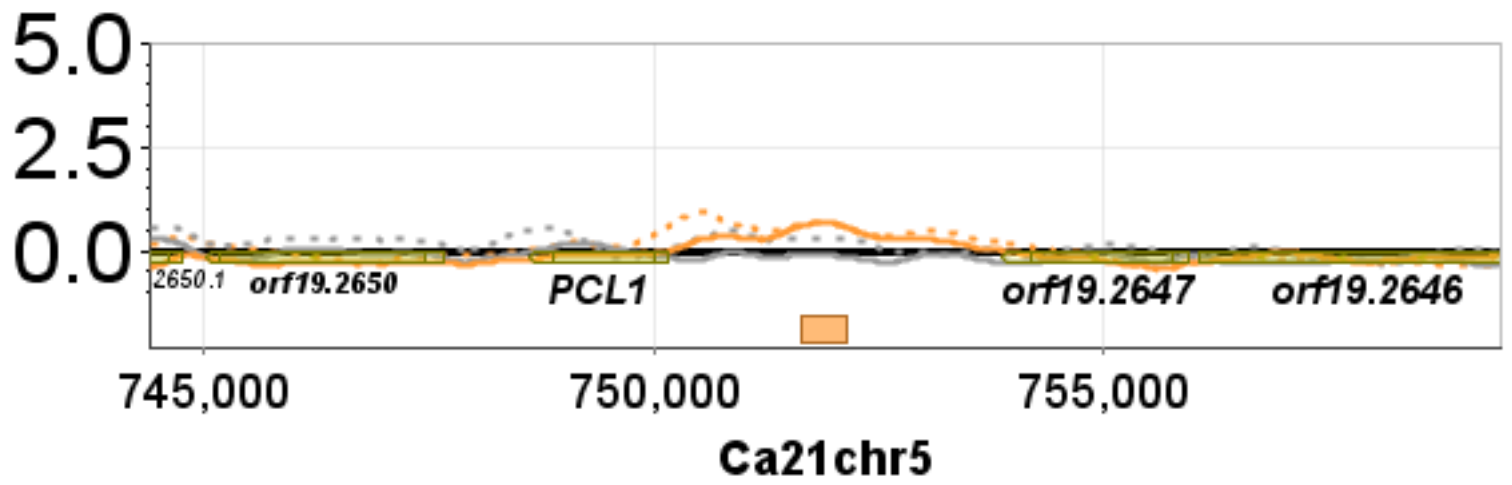

[0.676] Ca21chr4:728811-743810 [+] [Intar\_781, orf19.3378, orf19.3376, HWP2, orf19.3375]

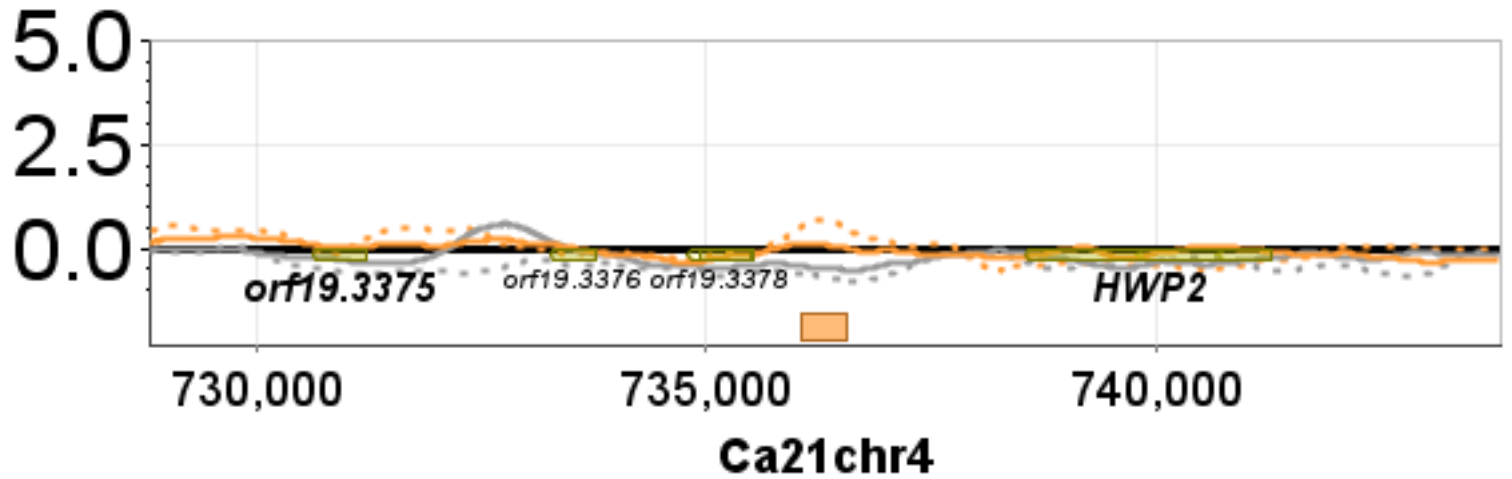

[0.675] Ca21chrR:2189707-2204706 [+] [orf19.7606, PUP1, orf19.7604, orf19.7608, PGA11]

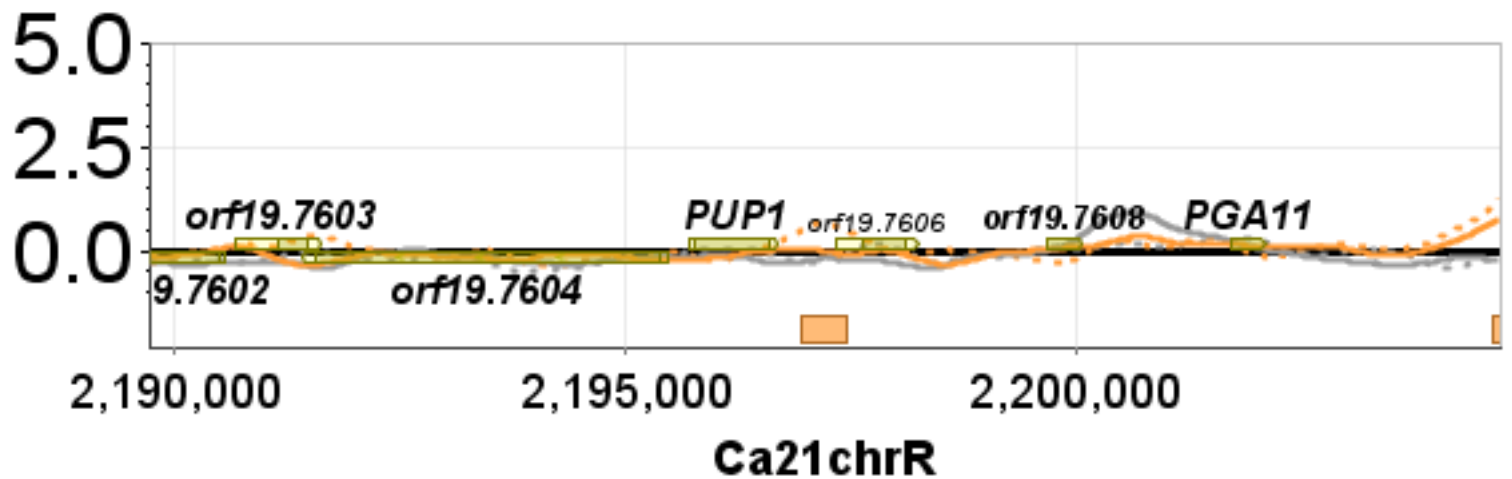

[0.665] Ca21chrR:1129185-1144184 [+] [orf19.1008, orf19.1007, orf19.1009, MNT3, ntar\_1282]

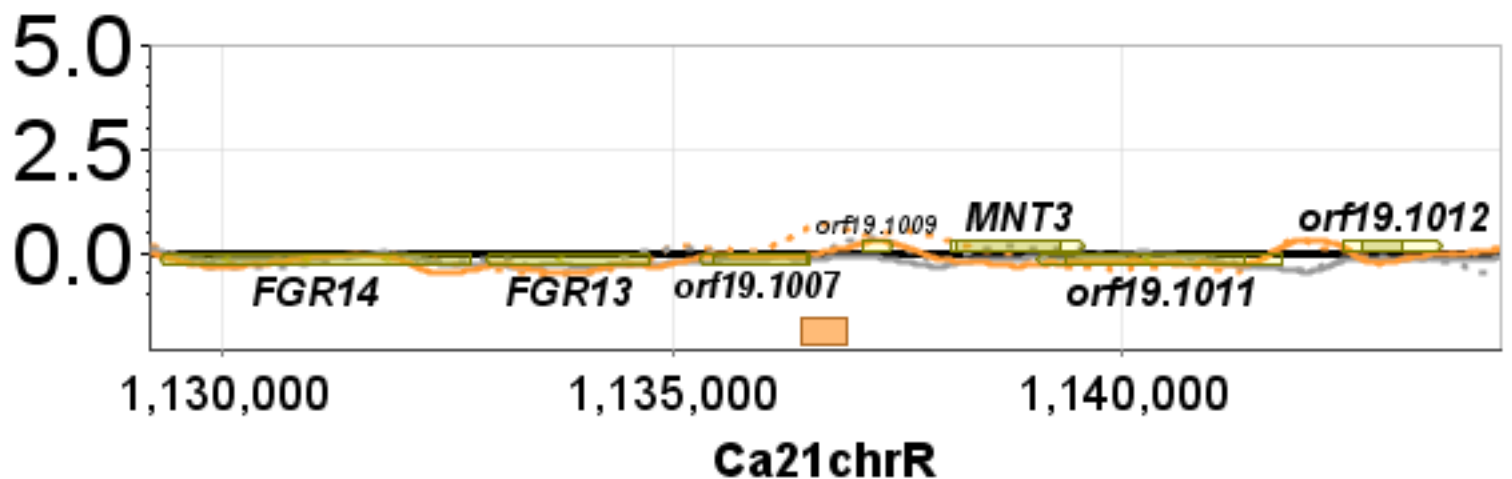

[0.663] Ca21chr6:121394-136393 [+] [ntar\_973, ntar\_972, FAT1, orf19.3655, COX15]

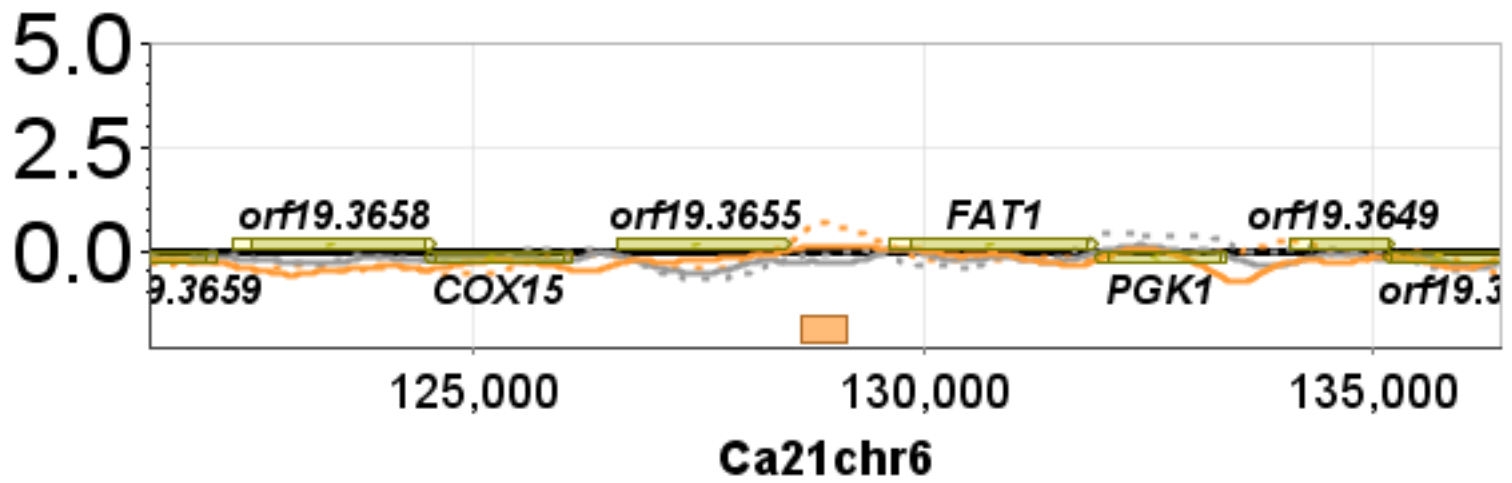

[0.662] Ca21chr1:1493374-1508373 [+] [RBT4, orf19.6200, orf19.6203, orf19.6199, orf19.6198.1]

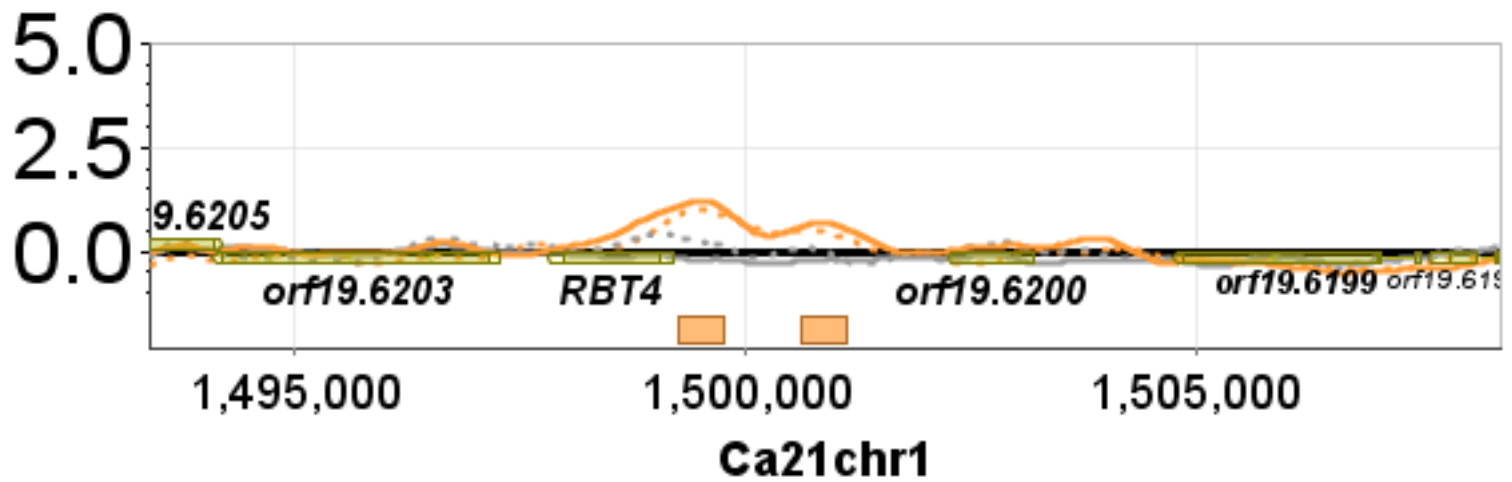

[0.661] Ca21chr2:97430-112429 [+] [ntar\_292, orf19.2063, orf19.2064, orf19.2065, SOD4]

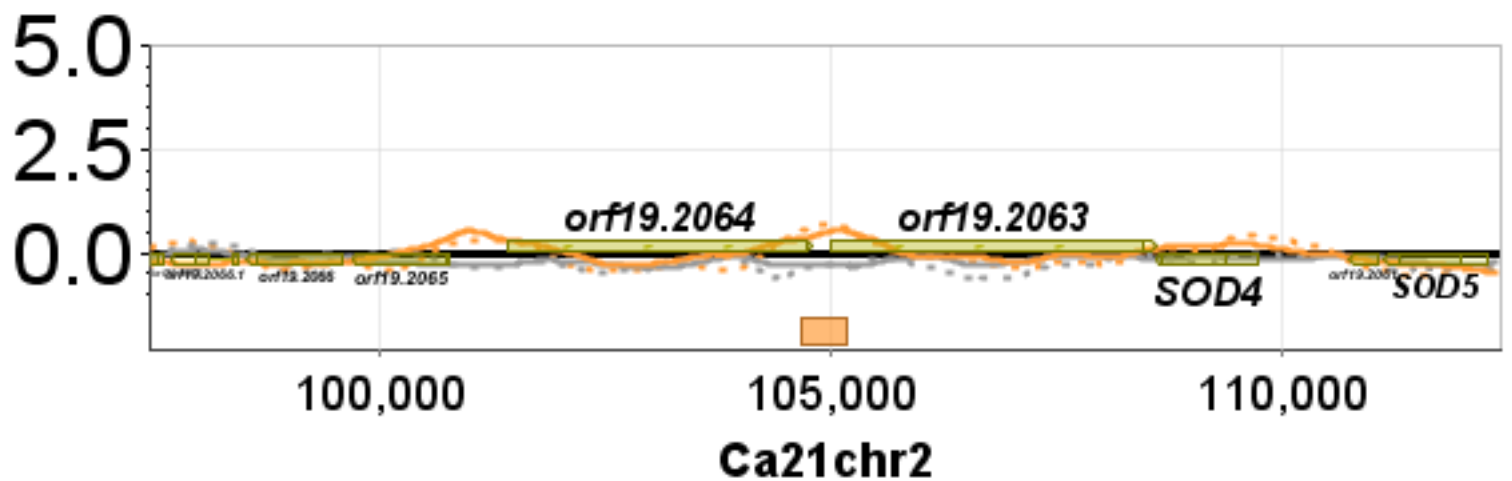

[0.661] Ca21chr2:1332114-1347113 [+] [ntar\_406, orf19.35, orf19.34, ntar\_405, ntar\_404]

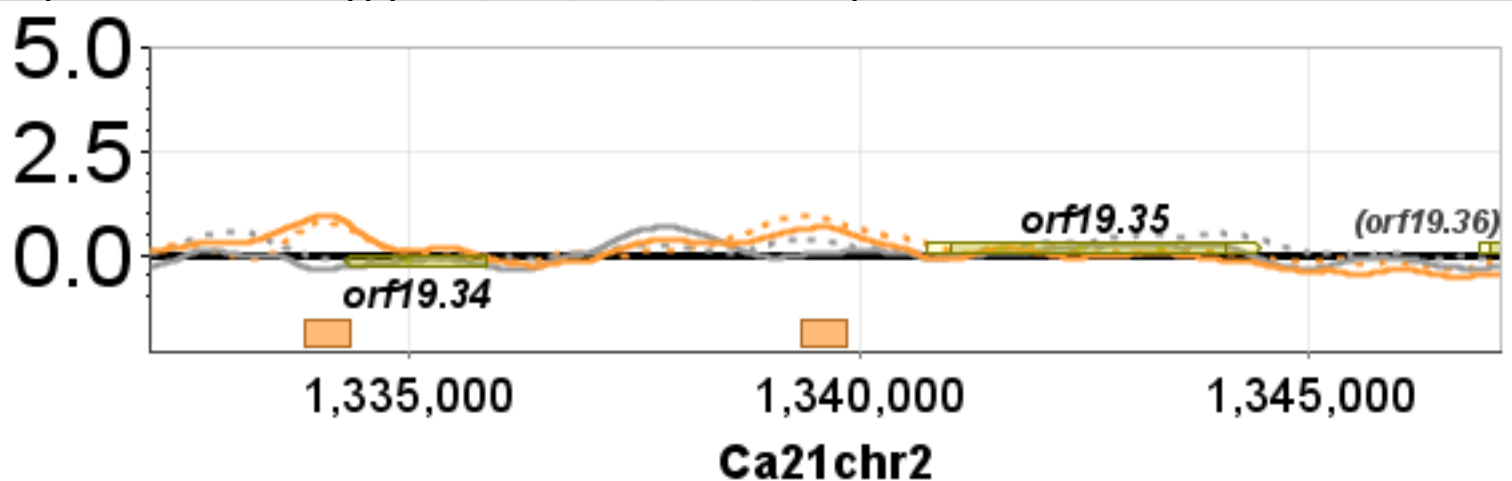



[0.656] Ca21chr6:744752-759751 [+] [orf19.5719, orf19.5720, ntar\_1028, orf19.5718, orf19.5722]

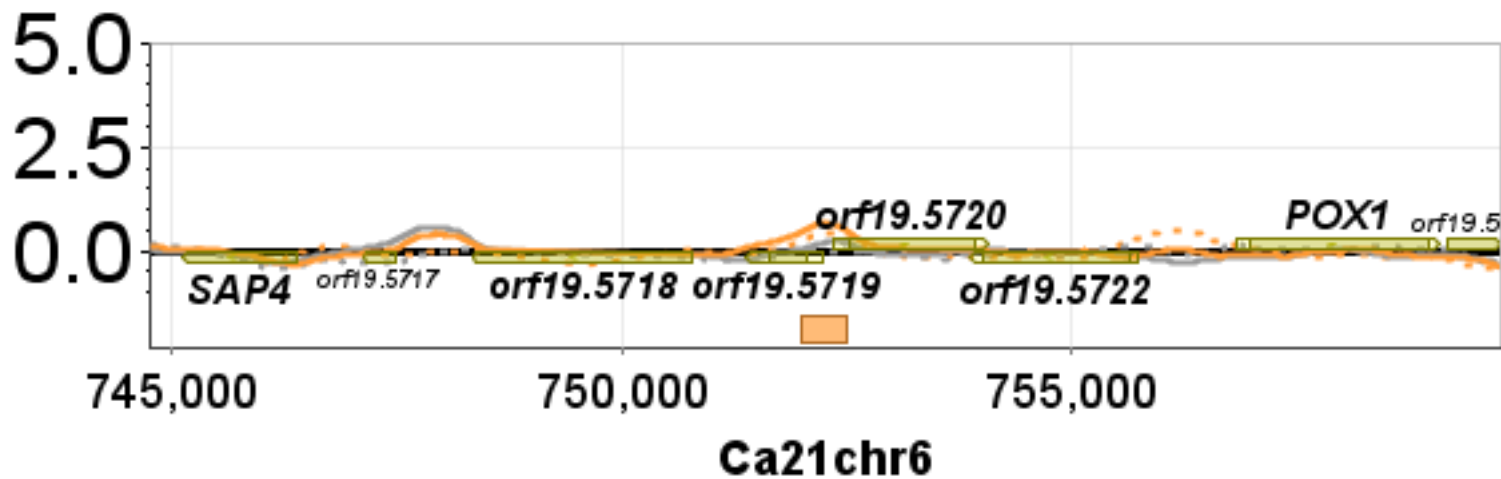

[0.653] Ca21chr6:341034-356033 [+] [orf19.3420, FMP27, MAE1, orf19.3418, ACF2]

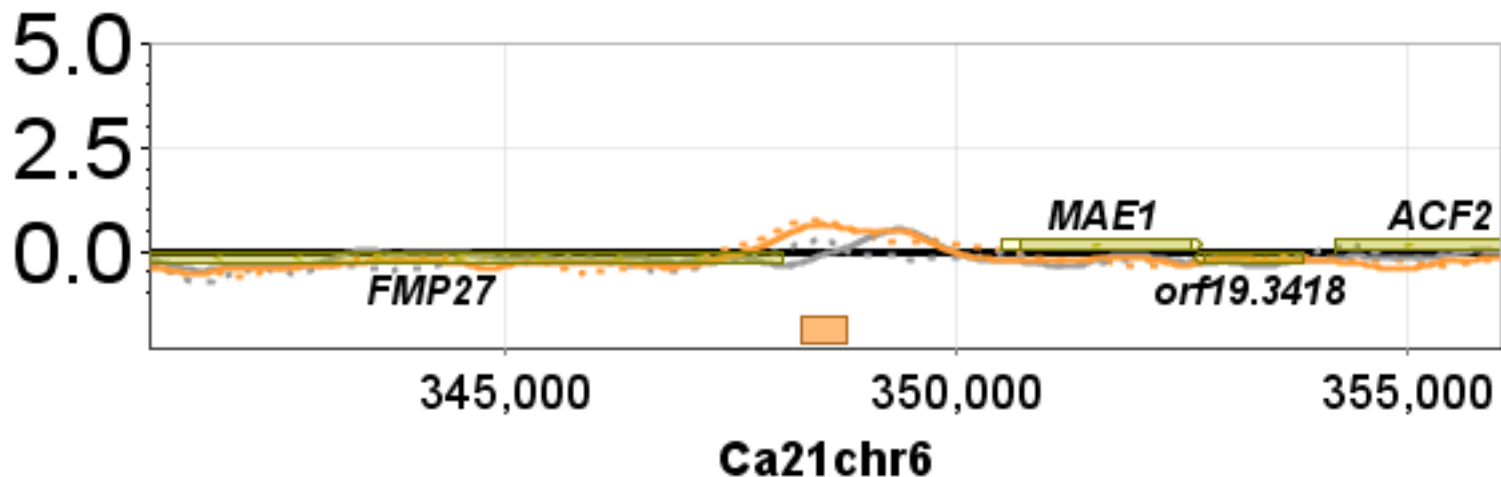

[0.631] Ca21chr3:1211094-1226093 [+] [orf19.6983, ntar\_632, ntar\_633, orf19.6982]

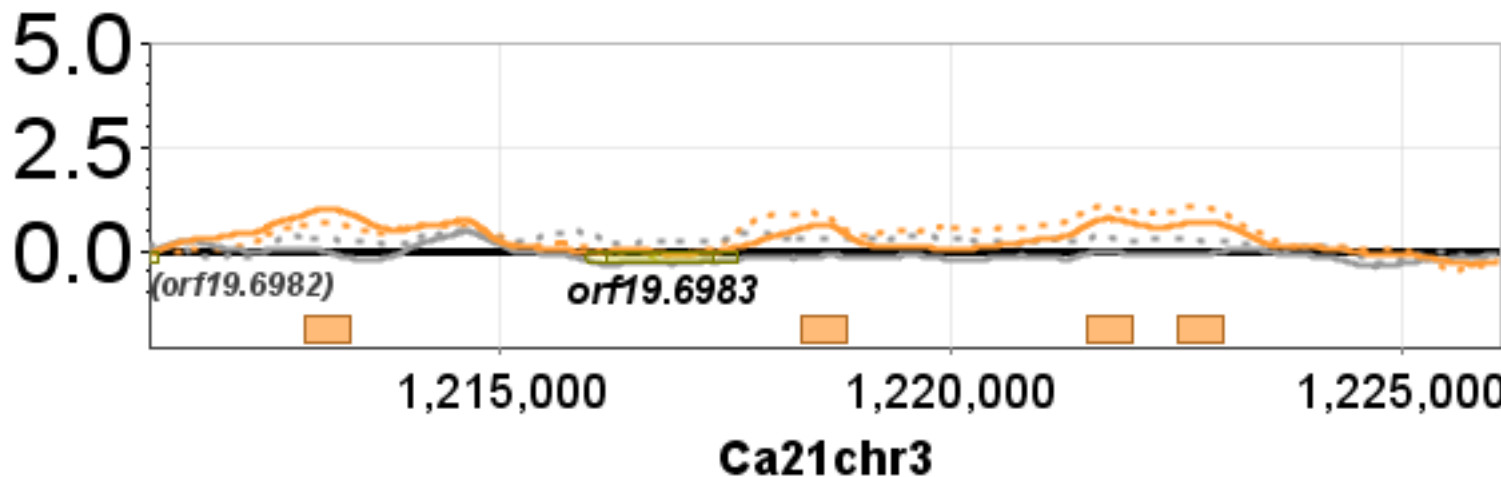

[0.63] Ca21chr1:2337765-2352764 [+] [ntar\_220, orf19.1830, ntar\_221, orf19.1005, ntar\_222]

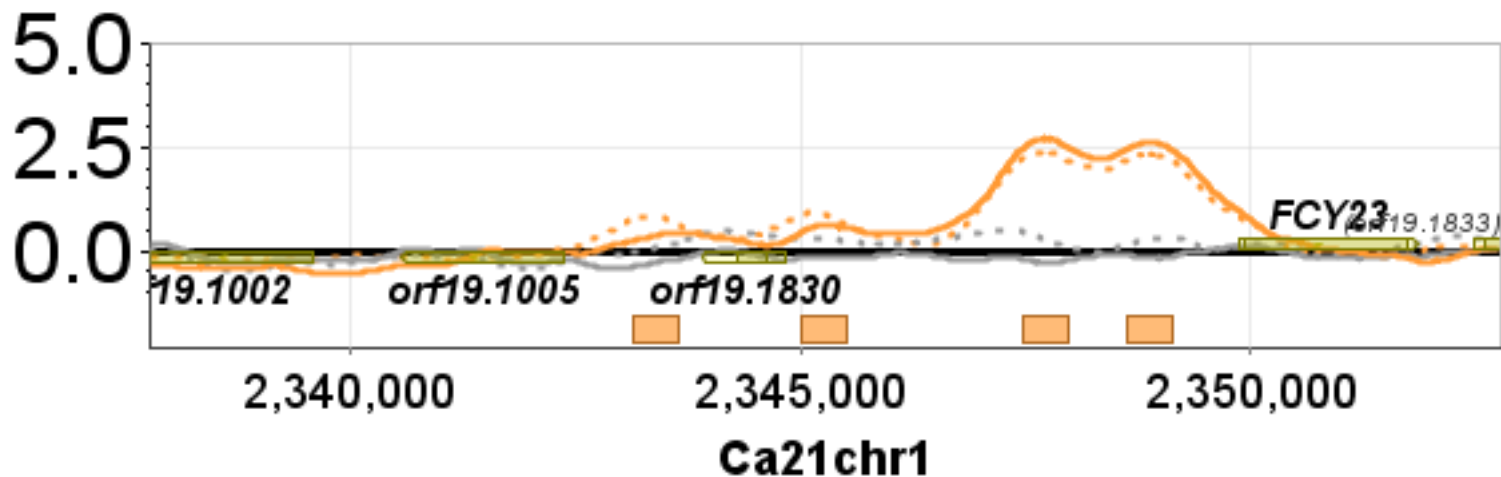

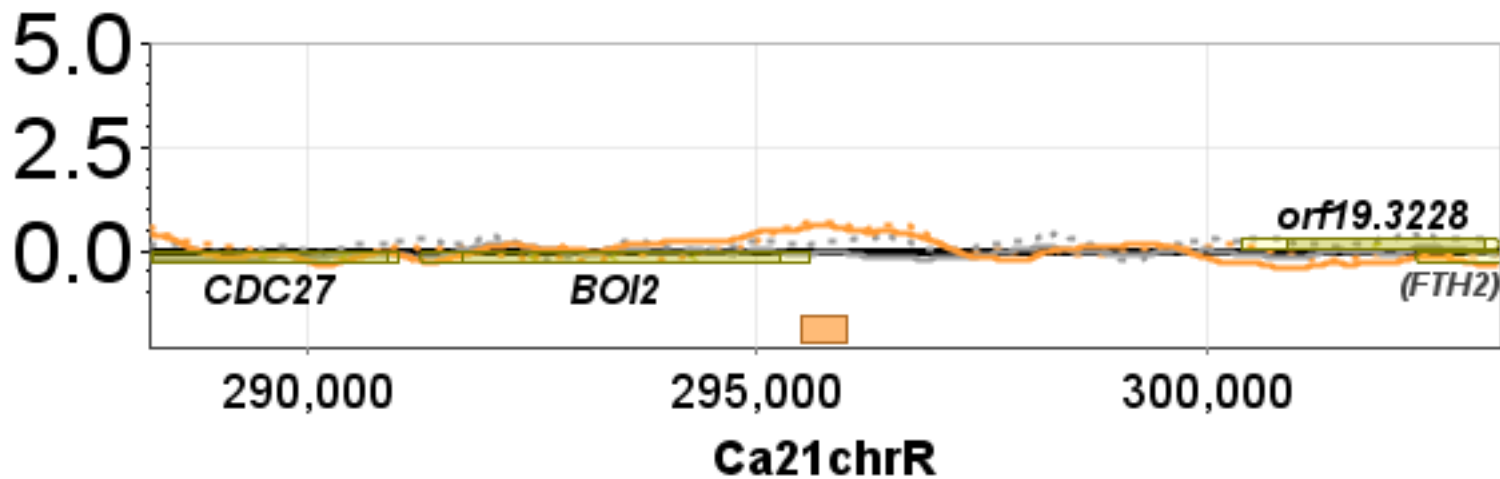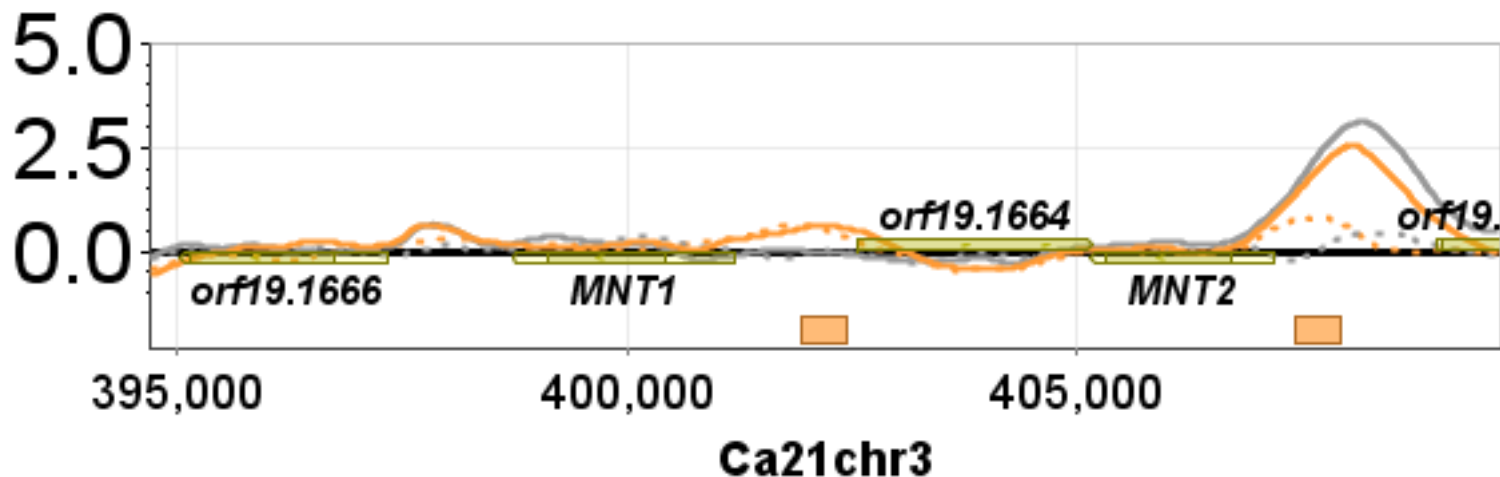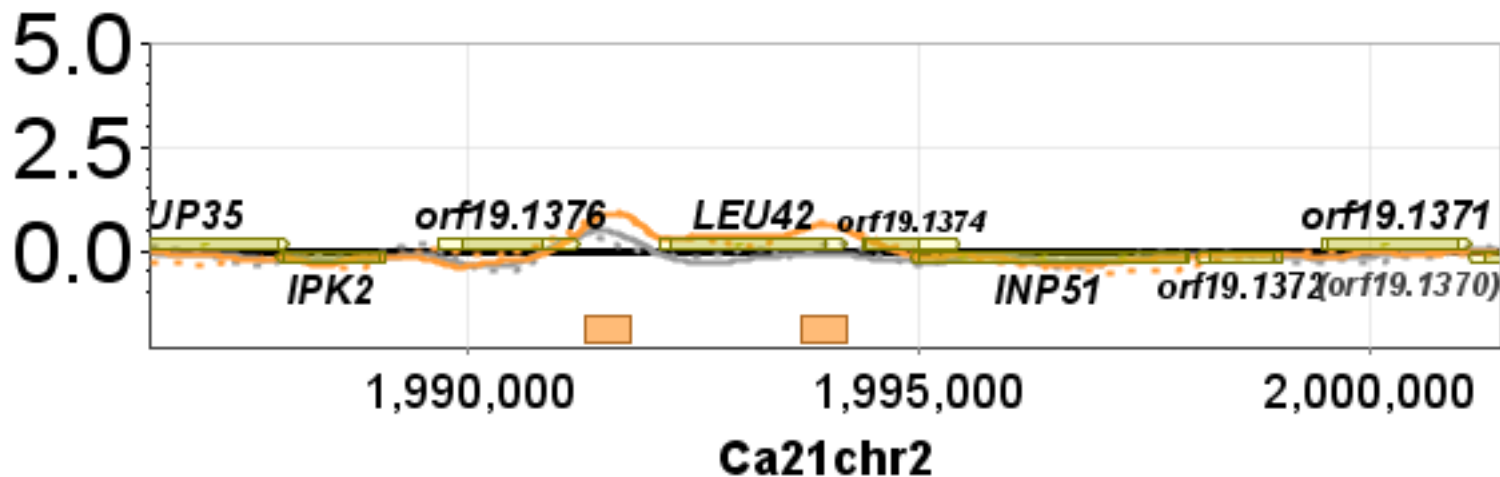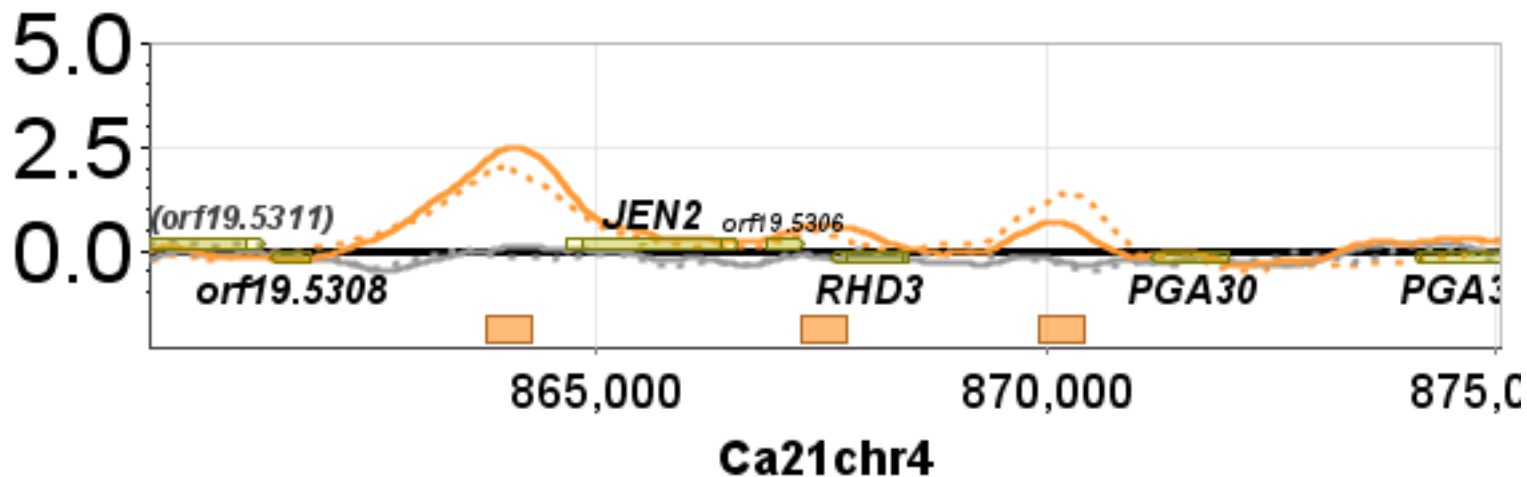

[0.61] Ca21chr4:886451-901450 [+] [AXL2, ntar\_795, orf19.5291, orf19.5290, ntar\_796]

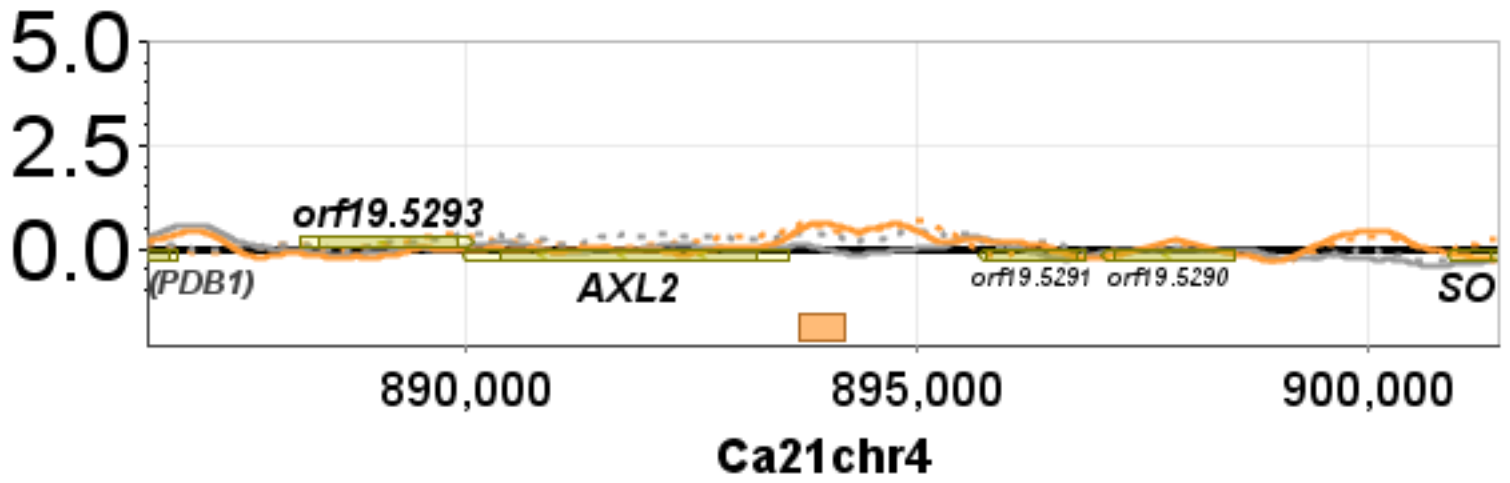

[0.6] Ca21chr4:686020-701019 [+] [ntar\_778, orf19.1440.1, orf19.1440.2, ntar\_779, orf19.1440]

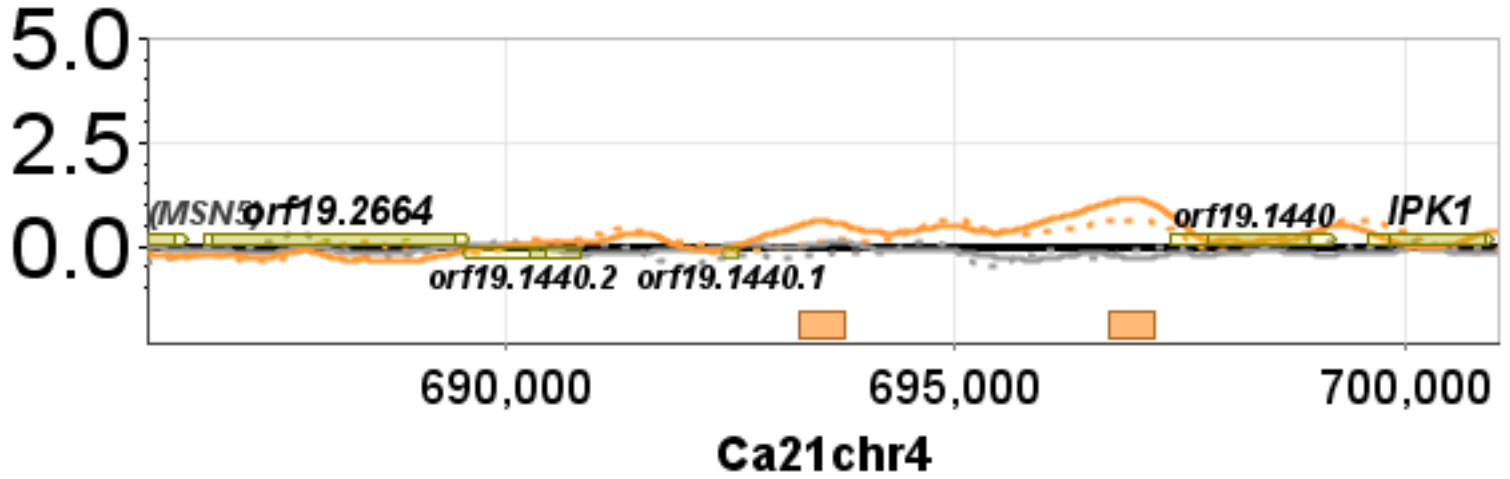

[0.58] Ca21chr3:874328-889327 [+] [orf19.5866, WSC1, orf19.5869, orf19.5865, URK1]

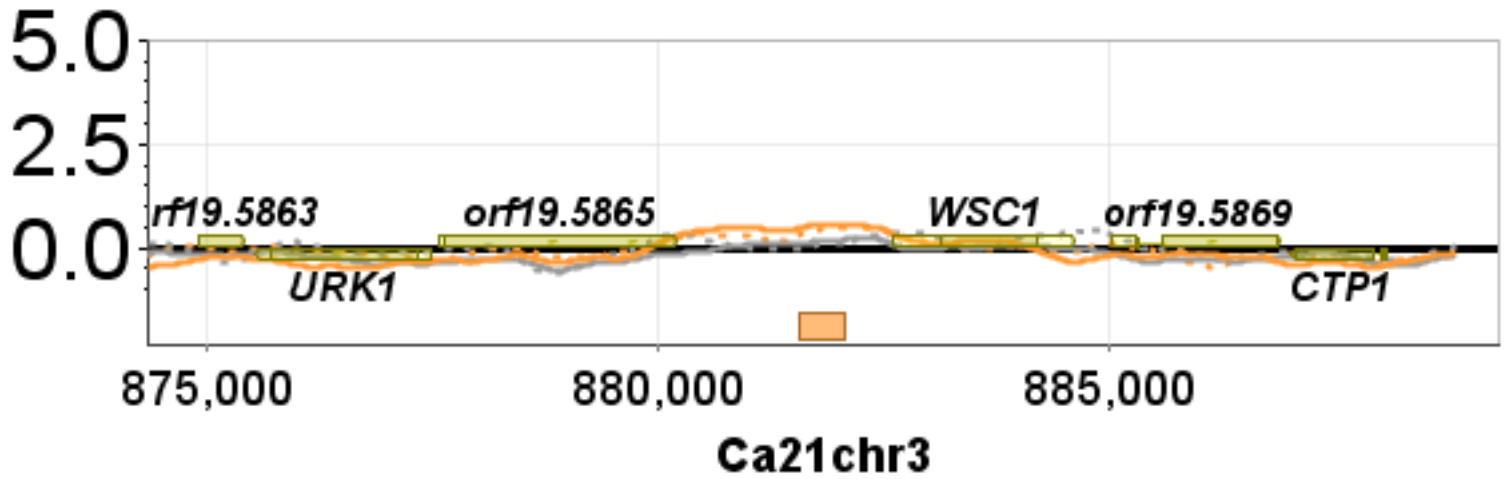

## **Full genome chromatin immunoprecipitation (ChIP-chip) mapping of Wor3 binding sites in opaque cells.**

Previously published plots of 15kb regions centered on the set of 174 Wor3 binding sites in opaque cells (Lohse, et al., 2013). Smoothed enrichment data for the Wor3-myc strain is shown in light blue, for the untagged control strain in grey. The 500bp called peaks of Wor3 enrichment are indicated by the light blue boxes in the lower track in each image. Peaks are arranged in order of decreasing Wor3 enrichment. Enrichment ( $\log_2$ ) is indicated on the y-axis. Chromosomal locations and specific enrichment levels for the peak are indicated in the strip above each panel; when multiple peaks are present the enrichment value corresponds to the peak at the center of the plot. Yellow boxes correspond to genes; 5' or 3' untranslated regions are included as lighter shaded portions of the box. Genes plotted above the bold line read in the sense direction; genes plotted below the line read in the antisense direction. Plots produced using the SnapShot Function in MochiView v1.46 (Homann and Johnson, 2010).

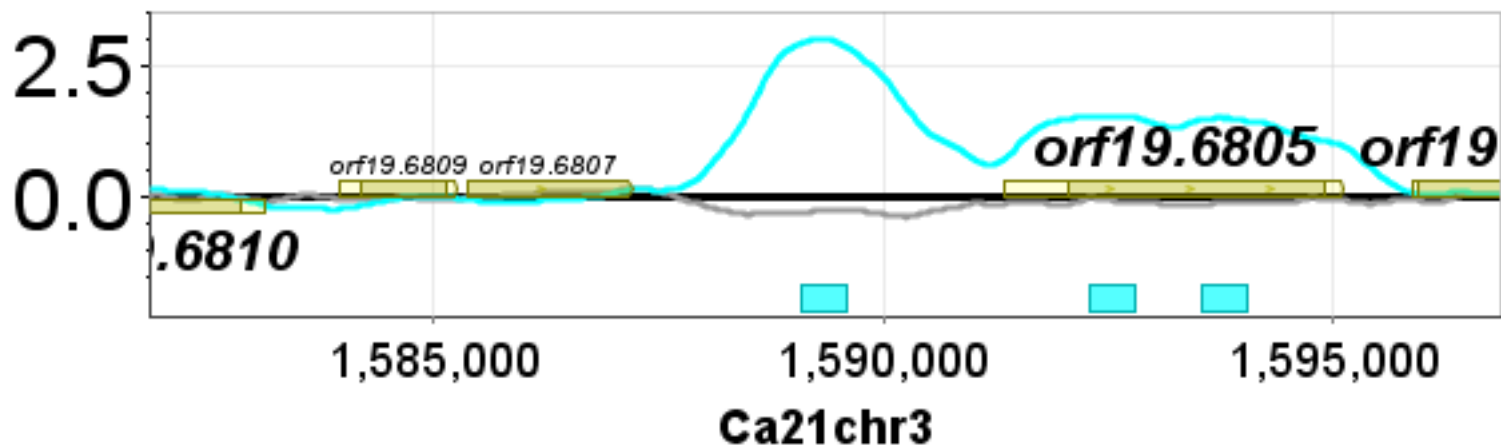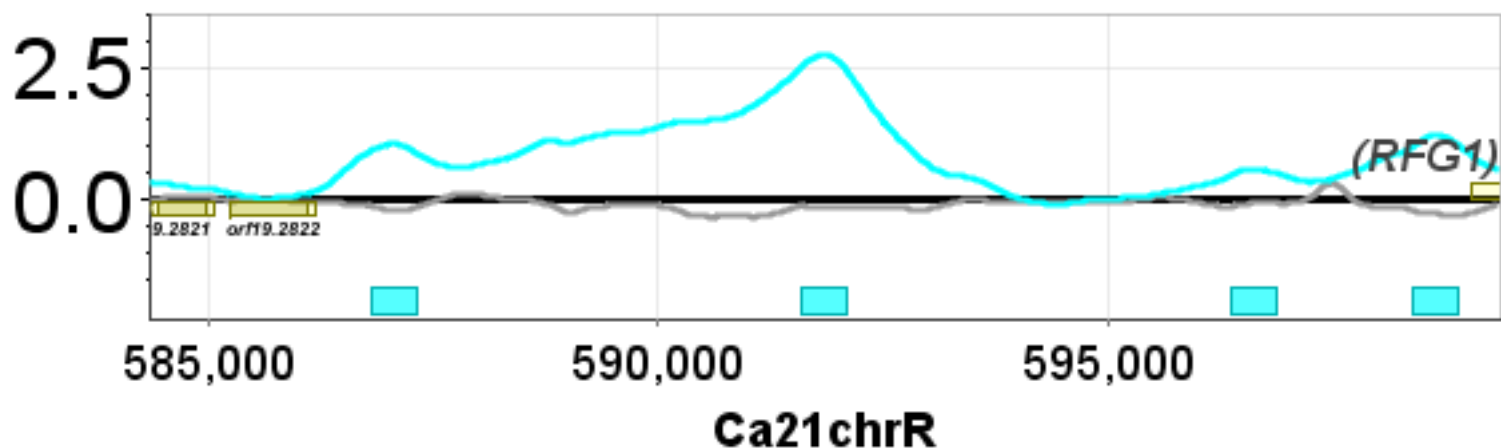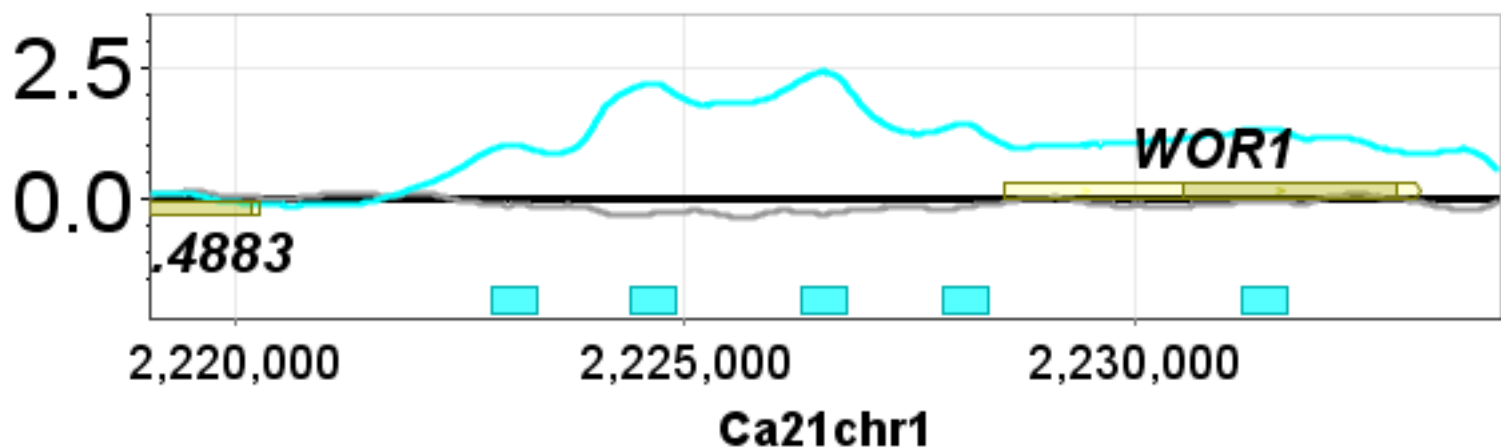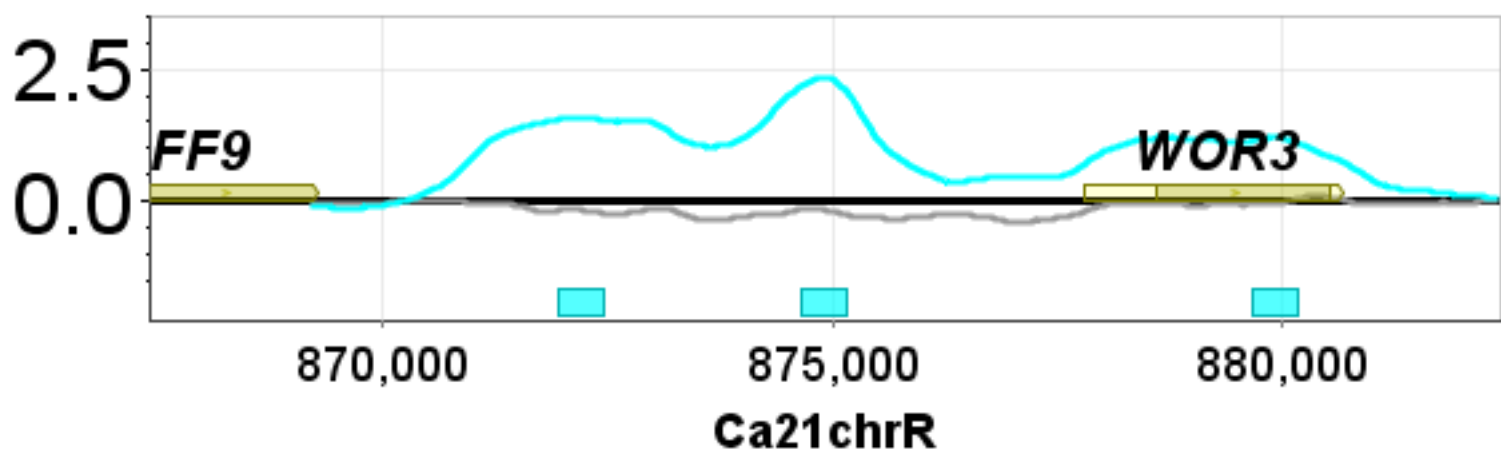

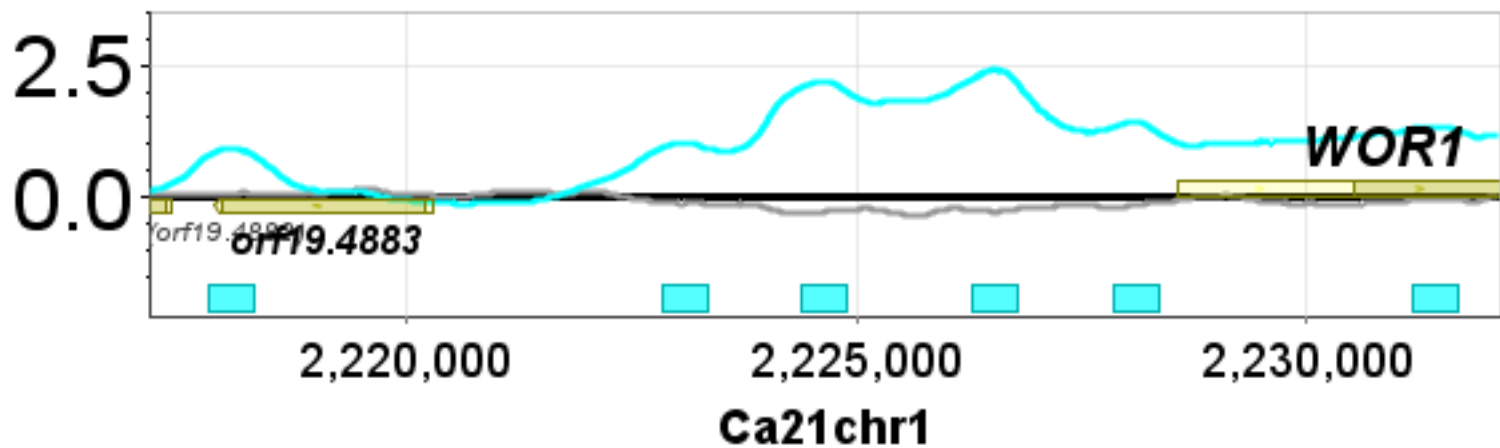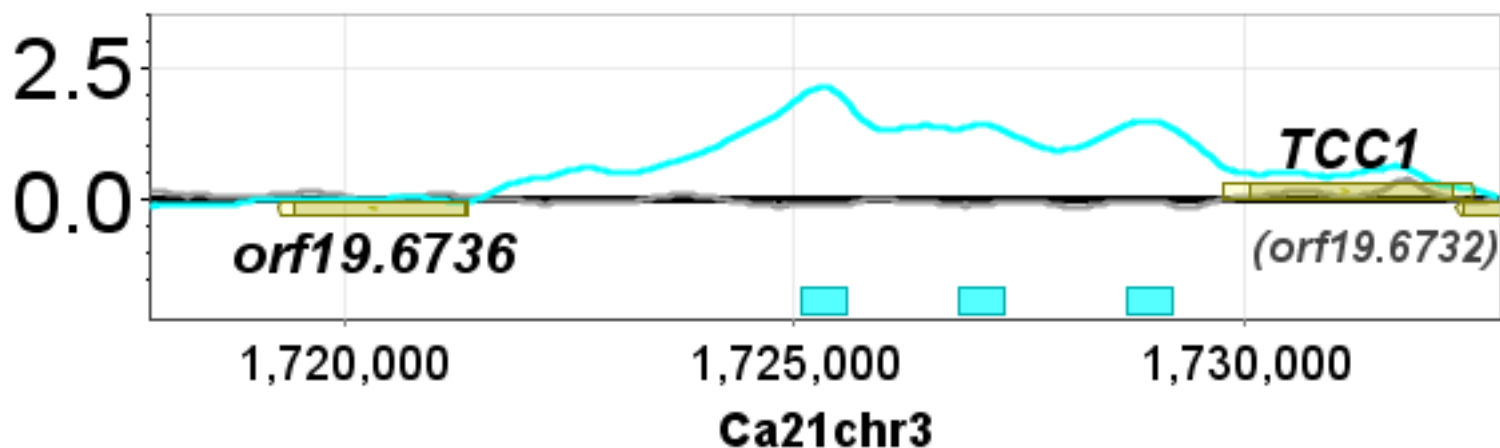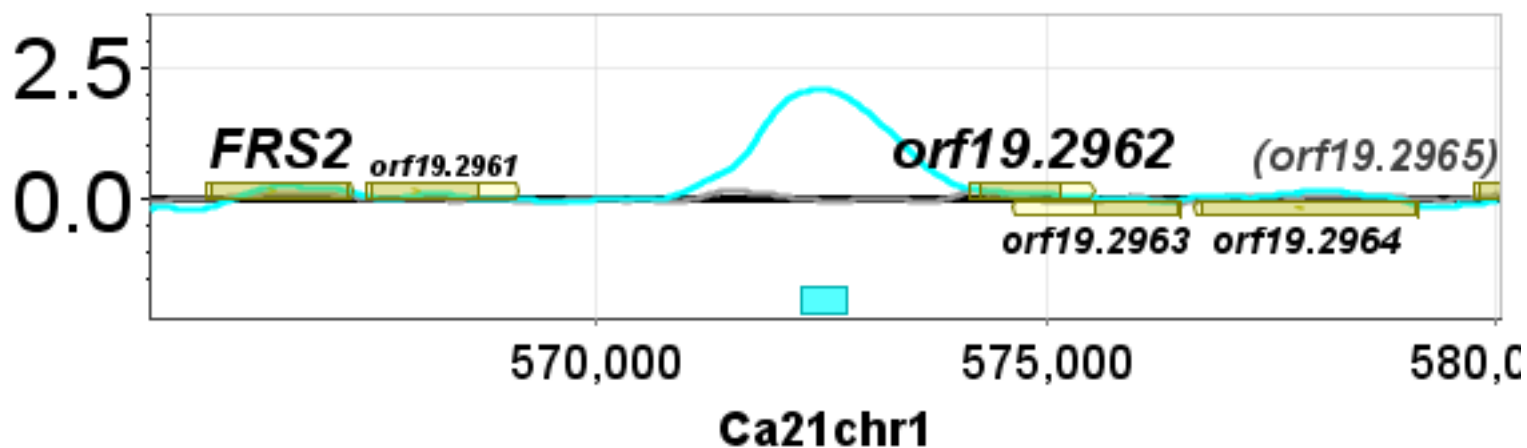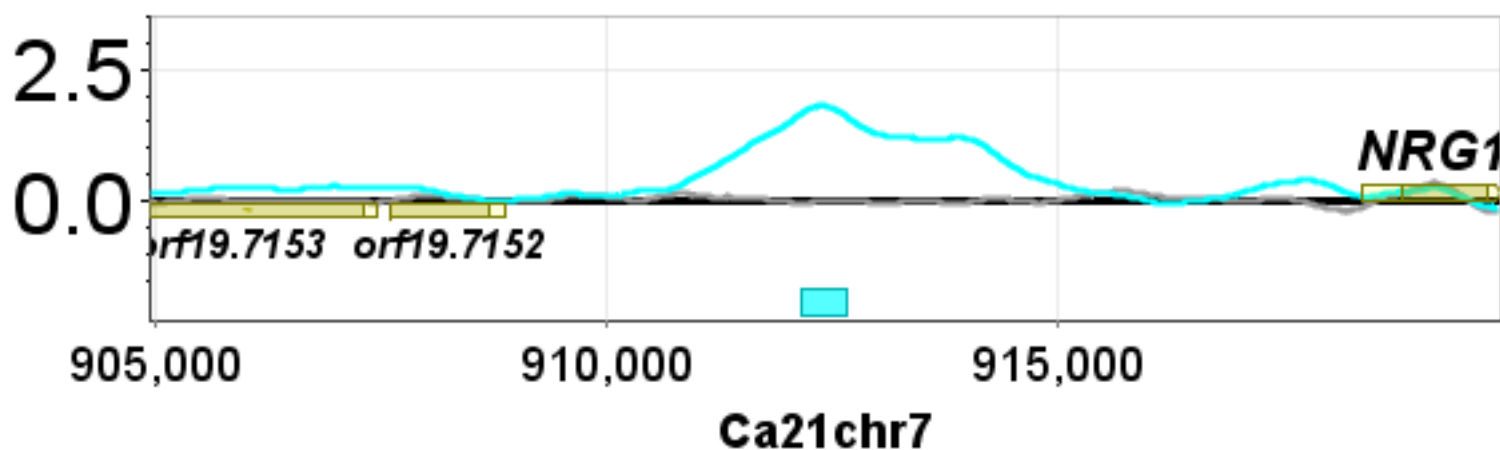

[1.683] Ca21chr3:1114086-1129085 [+] [ntar\_614, ntar\_615, ntar\_616, ntar\_617, WOR2]

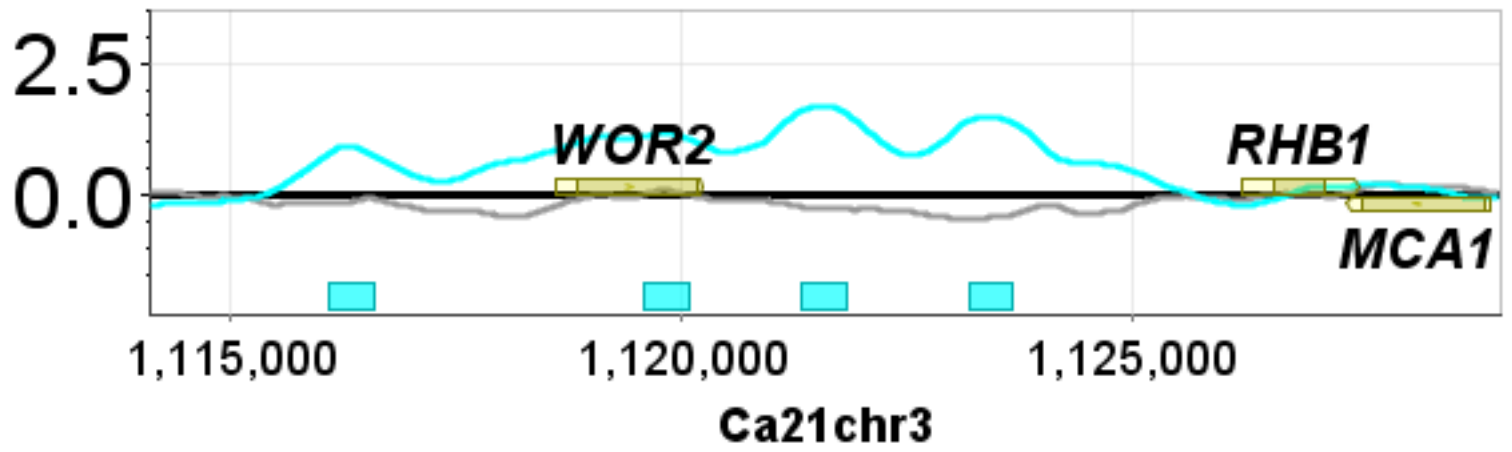

[1.653] Ca21chr5:247240-262239 [+] [orf19.1958, orf19.1959, ntar\_866, ntar\_867, ntar\_864]

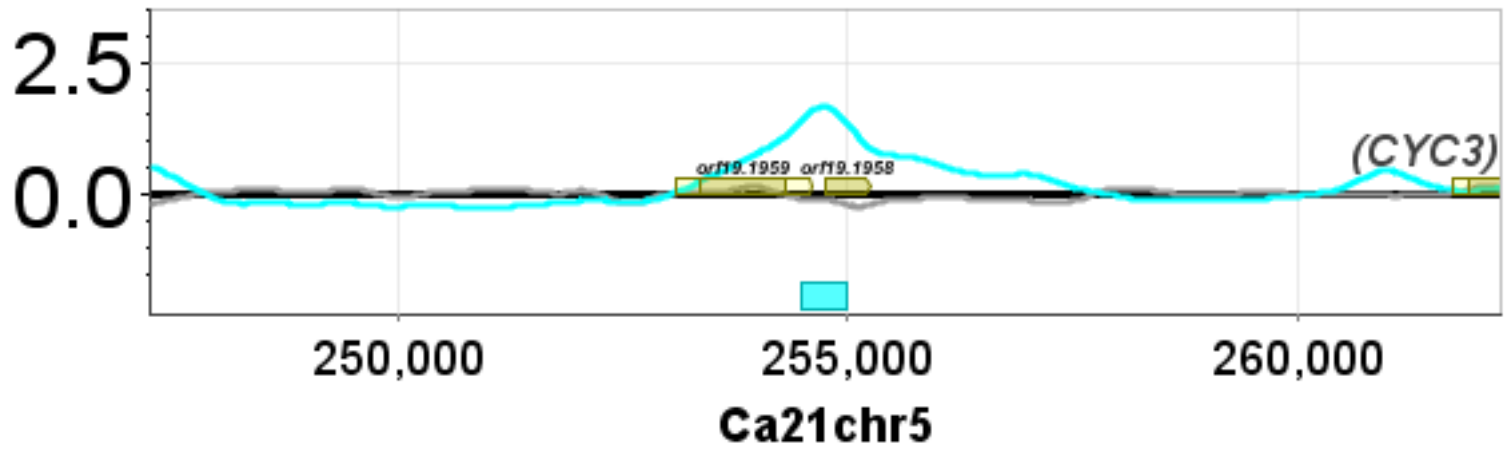

[1.642] Ca21chr2:1863334-1878333 [+] [ntar\_470, IFF6, ntar\_471, MET10, ntar\_469]

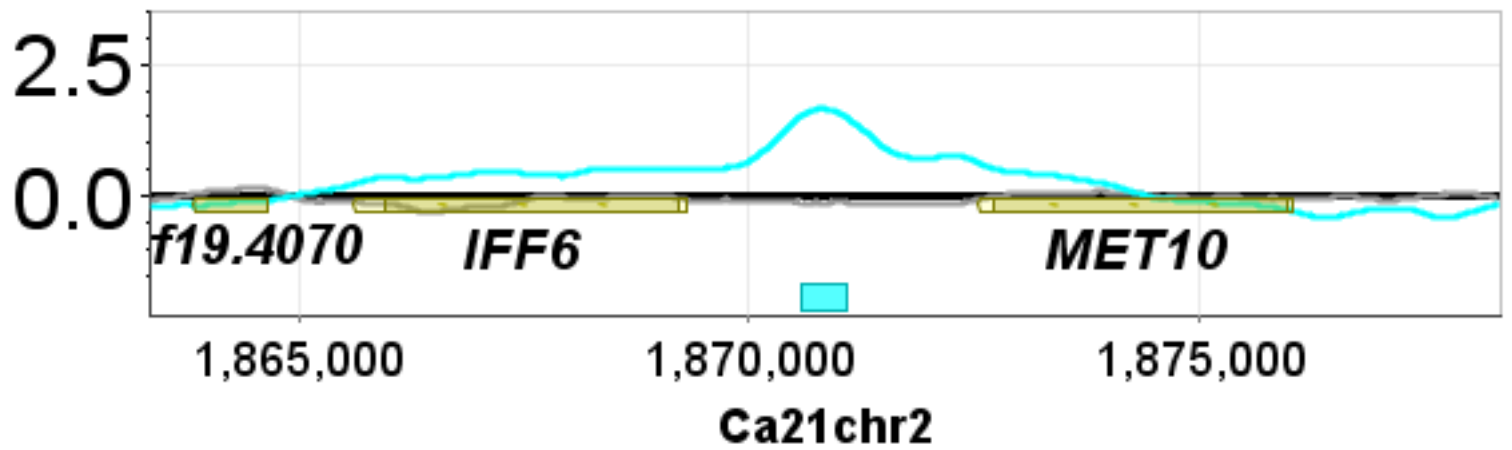

[1.588] Ca21chrR:864711-879710 [+] [orf19.467, IFF9, orf19.4358]

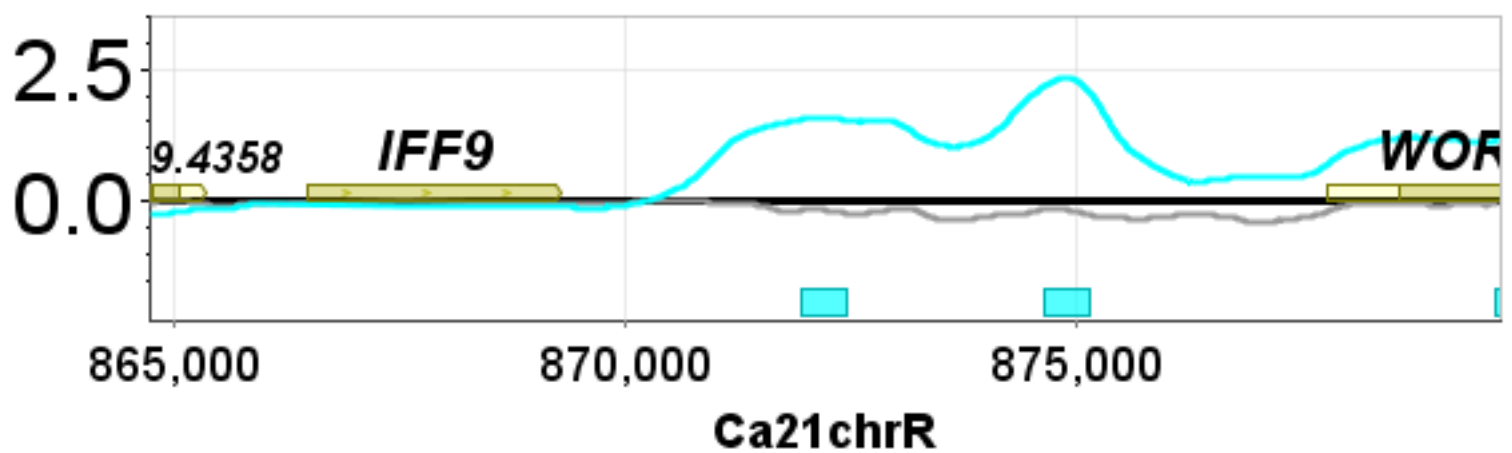

[1.569] Ca21chrR:2161624-2176623 [+] [ntar\_1405, FAA4, ntar\_1406, orf19.7590, ntar\_1404]

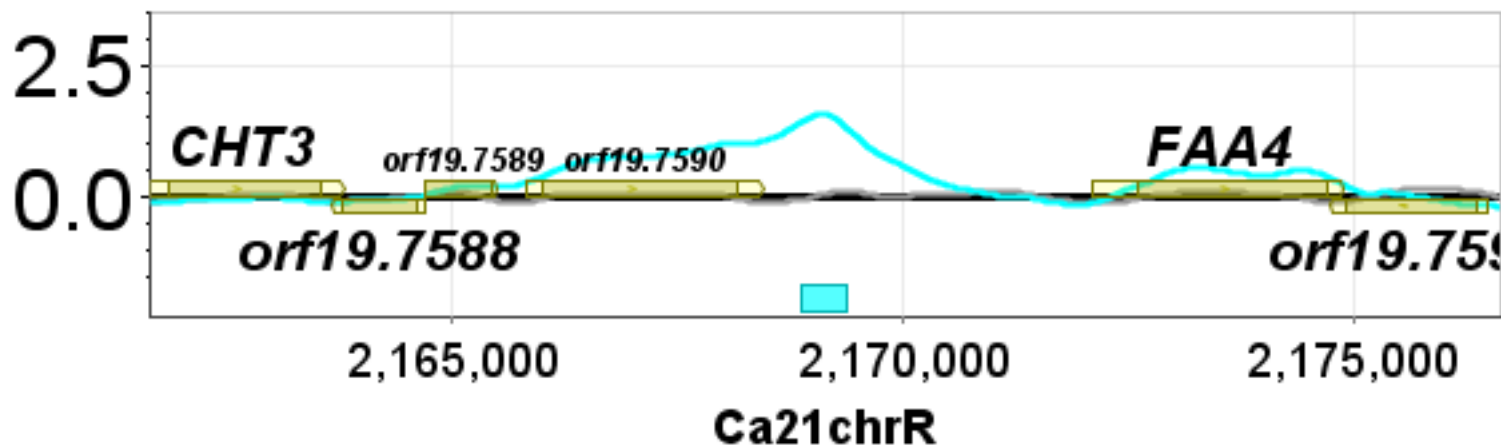

[1.526] Ca21chr3:1585056-1600055 [+] [orf19.6805, tv(qua)3, ntar\_667, orf19.6804, ntar\_666]

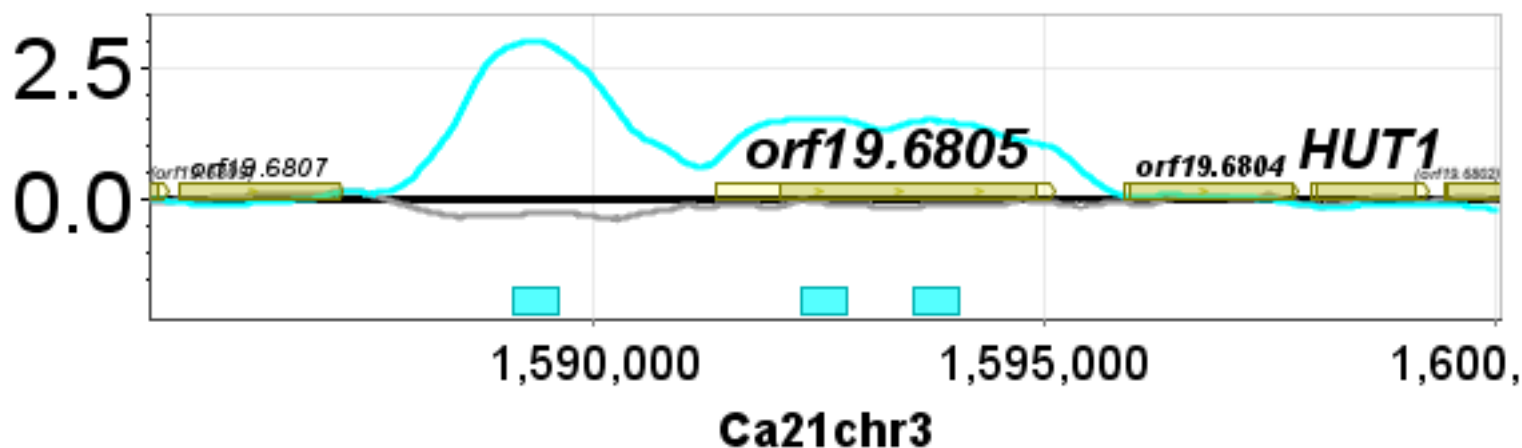

[1.524] Ca21chr3:1751464-1766463 [+] [orf19.6715, ntar\_688, orf19.6713, ABD1, orf19.6718]

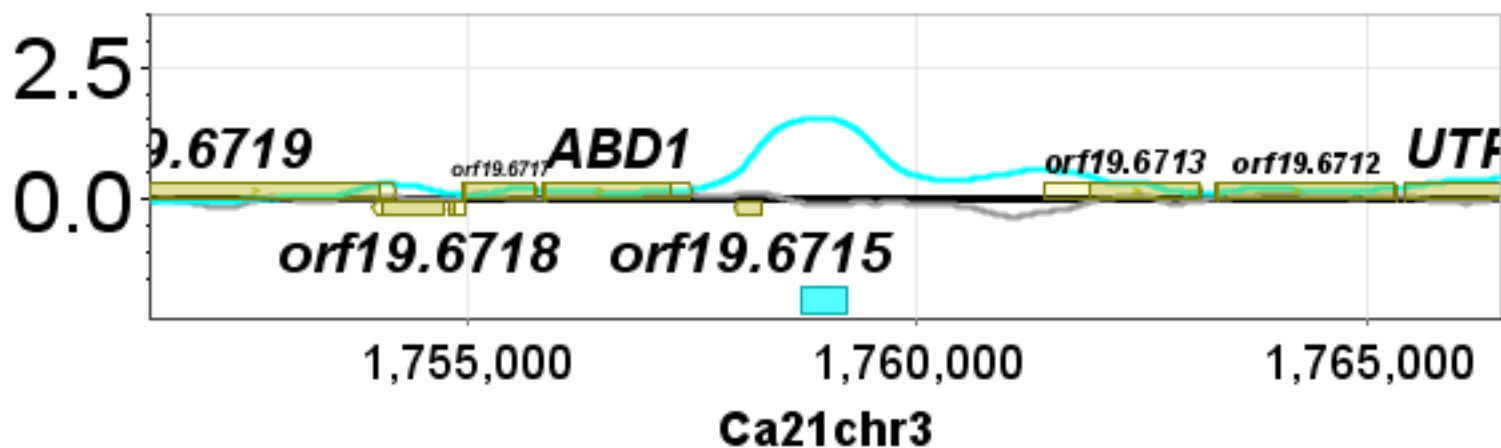

[1.5] Ca21chr3:1586289-1601288 [+] [tv(qua)3, orf19.6804, orf19.6805, ntar\_667, HUT1]

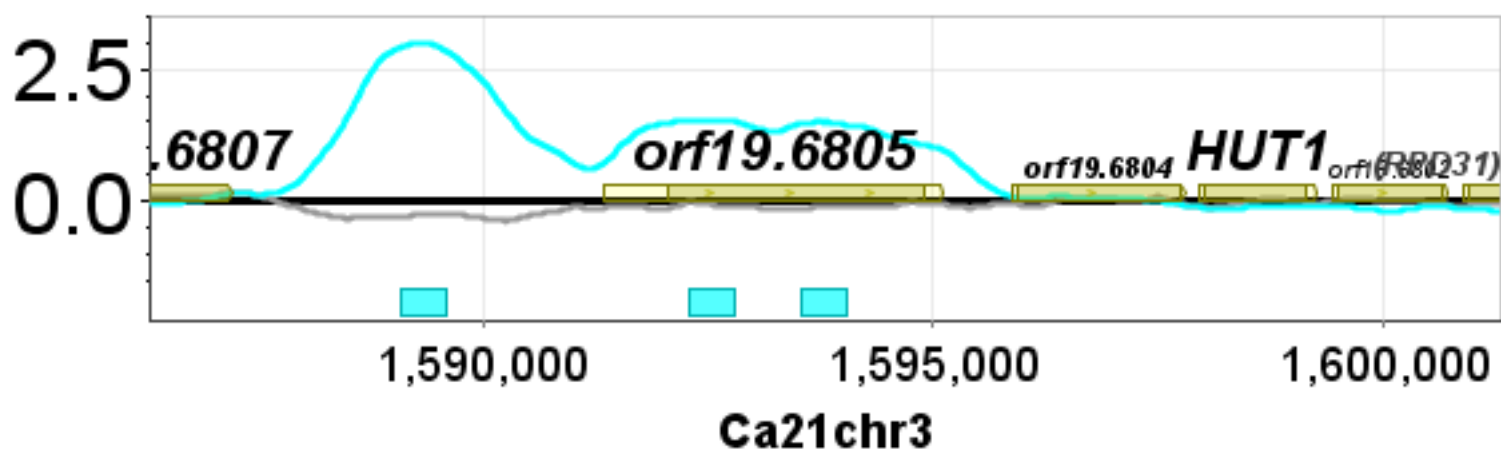



[1.498] Ca21chr1:2267262-2282261 [+] [ntar\_209, orf19.4900, GCA1, ntar\_210, orf19.4901]

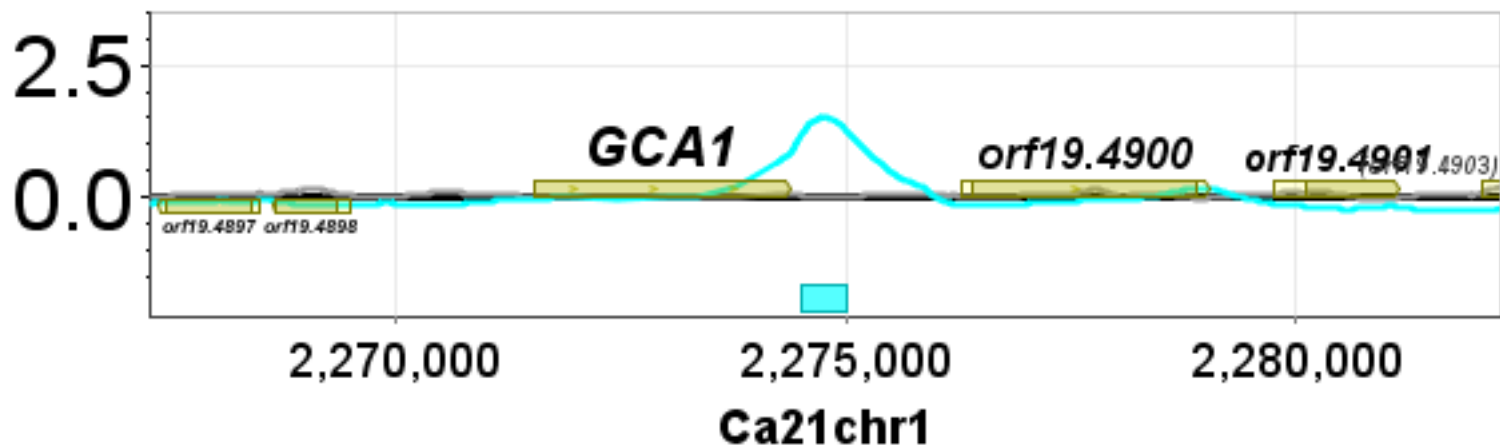

[1.49] Ca21chr3:1115940-1130939 [+] [ntar\_617, ntar\_616, ntar\_615, ntar\_614, ntar\_618]

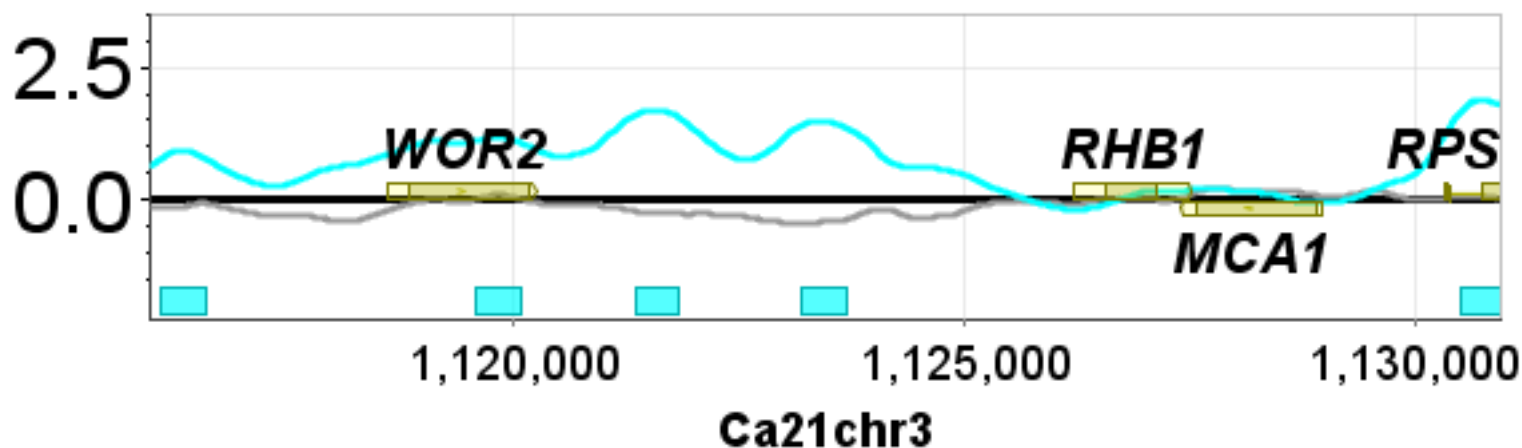

[1.475] Ca21chr3:1721431-1736430 [+] [TCC1, orf19.6732, orf19.6731.1, orf19.6731, ntar\_686]

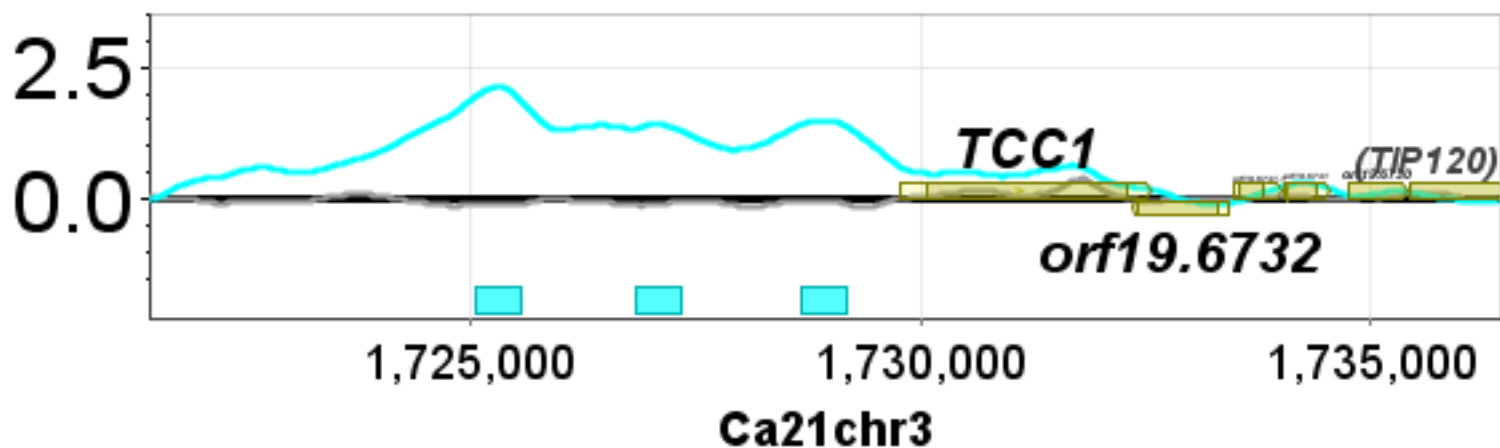

[1.444] Ca21chr5:110393-125392 [+] [orf19.934, orf19.933, ntar\_855, AGA1, orf19.932]

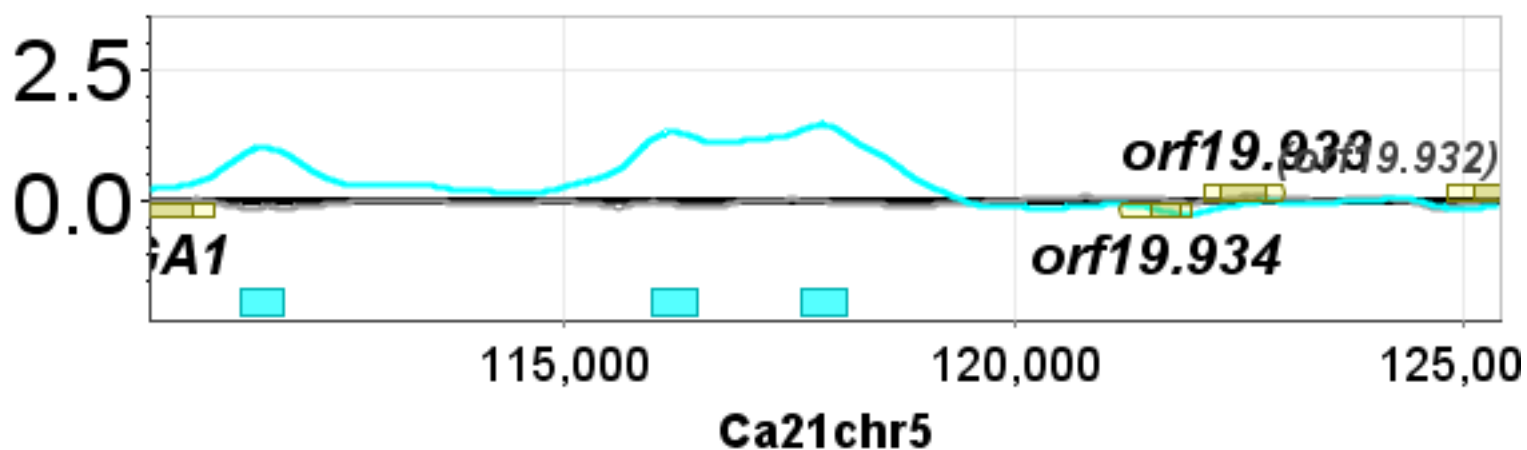

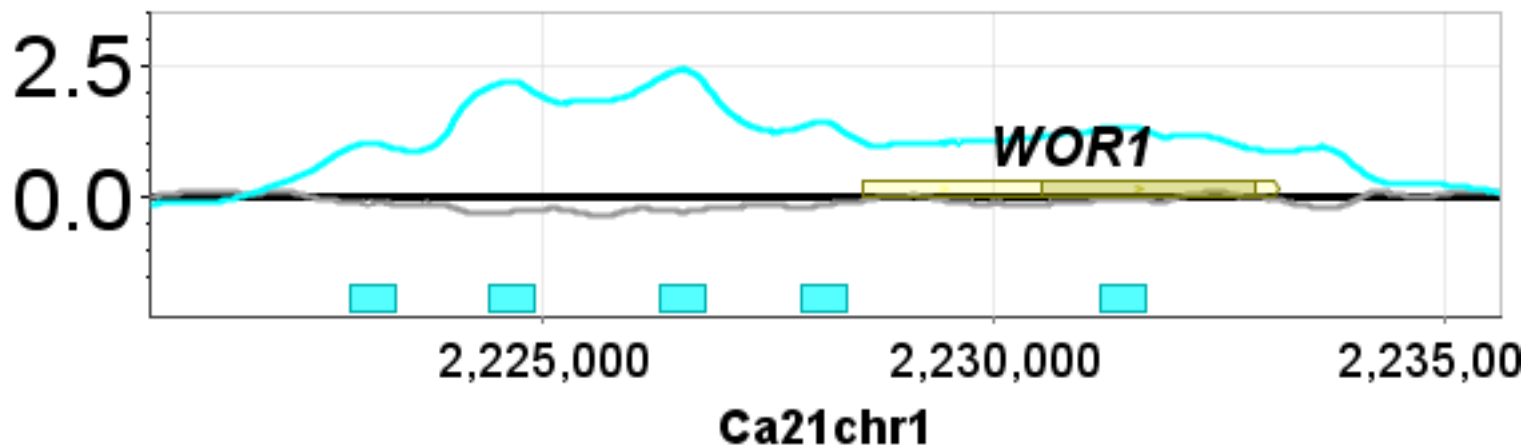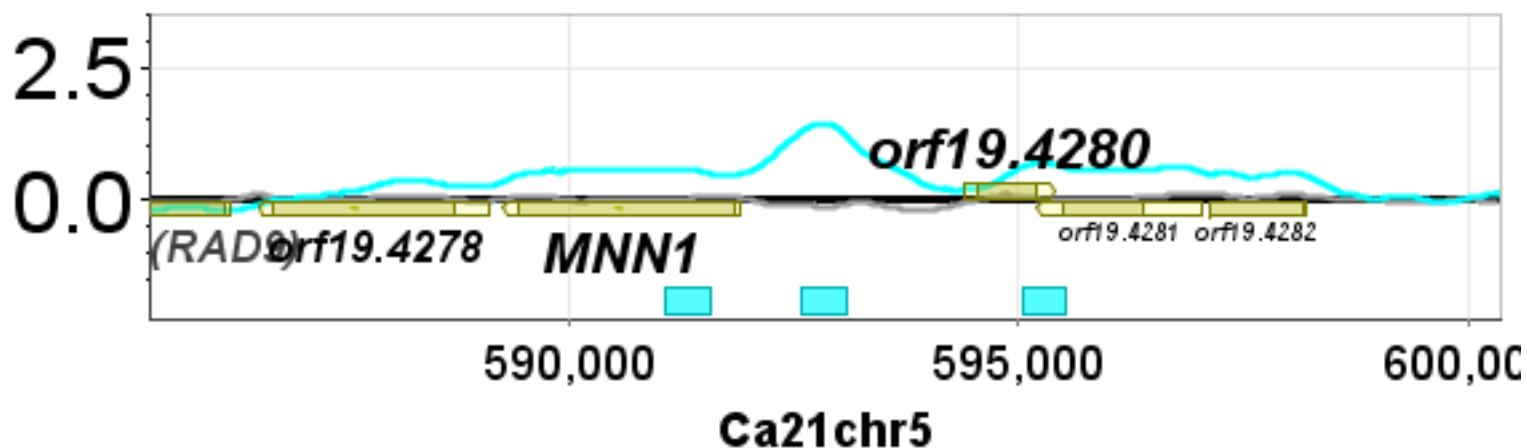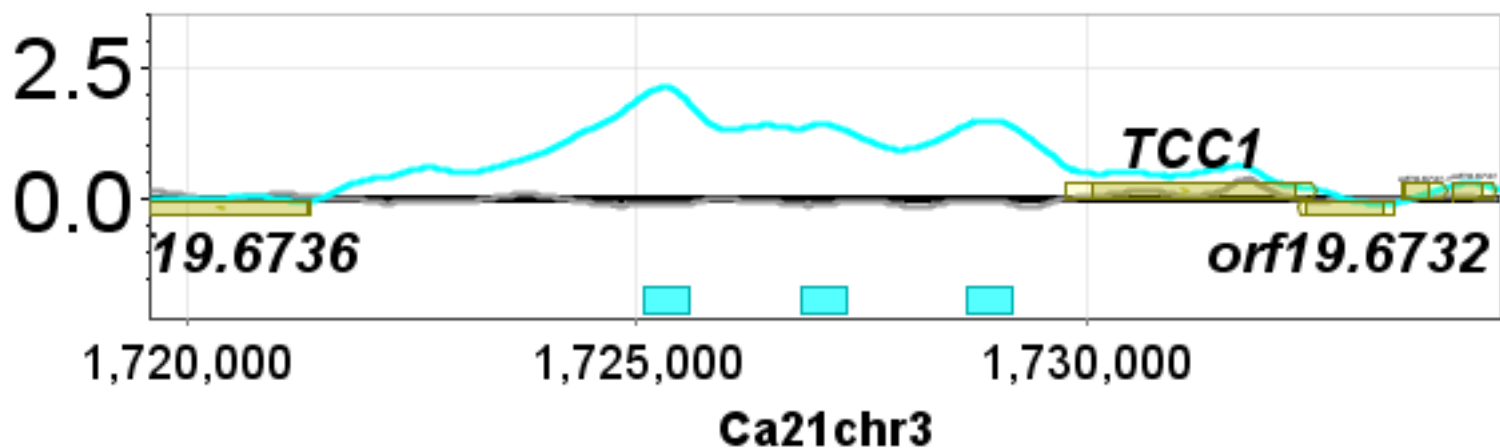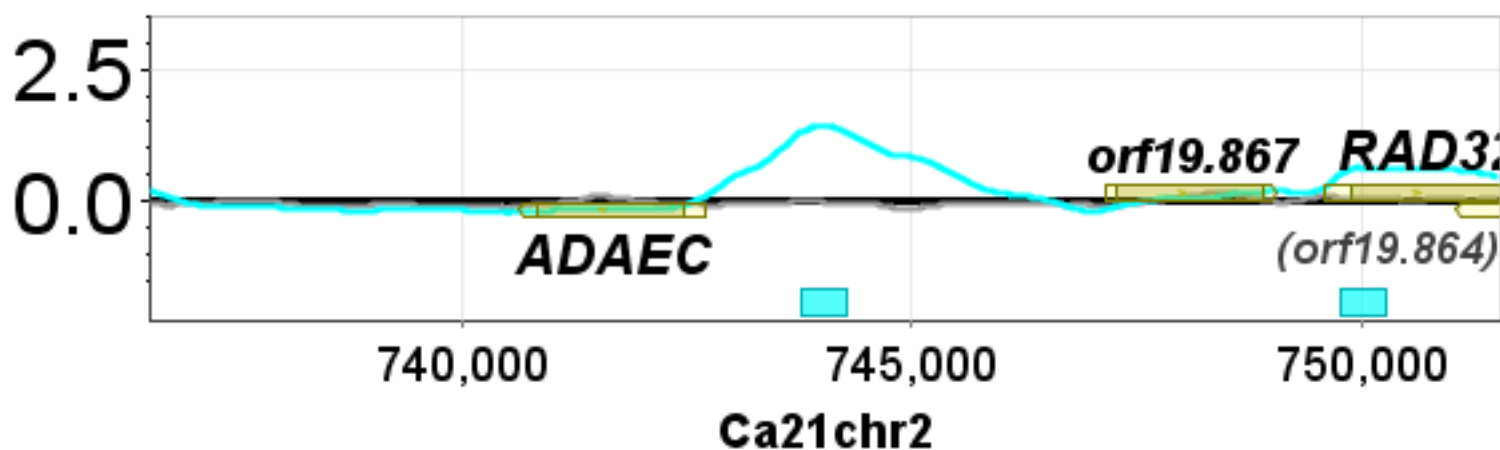

[1.336] Ca21chrR:27547-42546 [+] [orf19.7522, REP1, MKC1, POT1, orf19.7527]

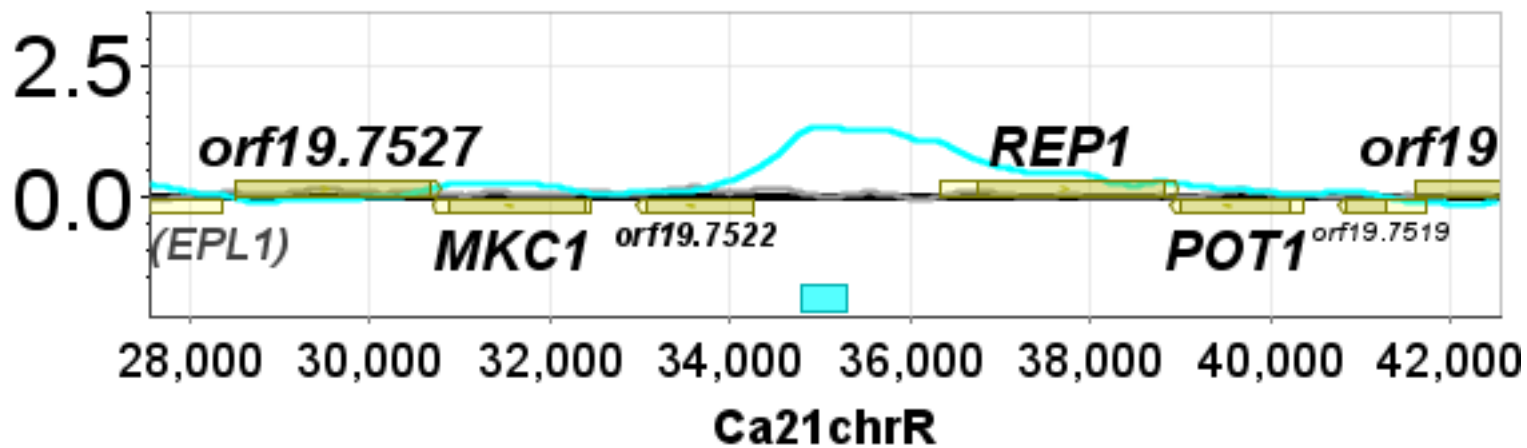

[1.333] Ca21chr1:2223941-2238940 [+] [WOR1, MIR1]

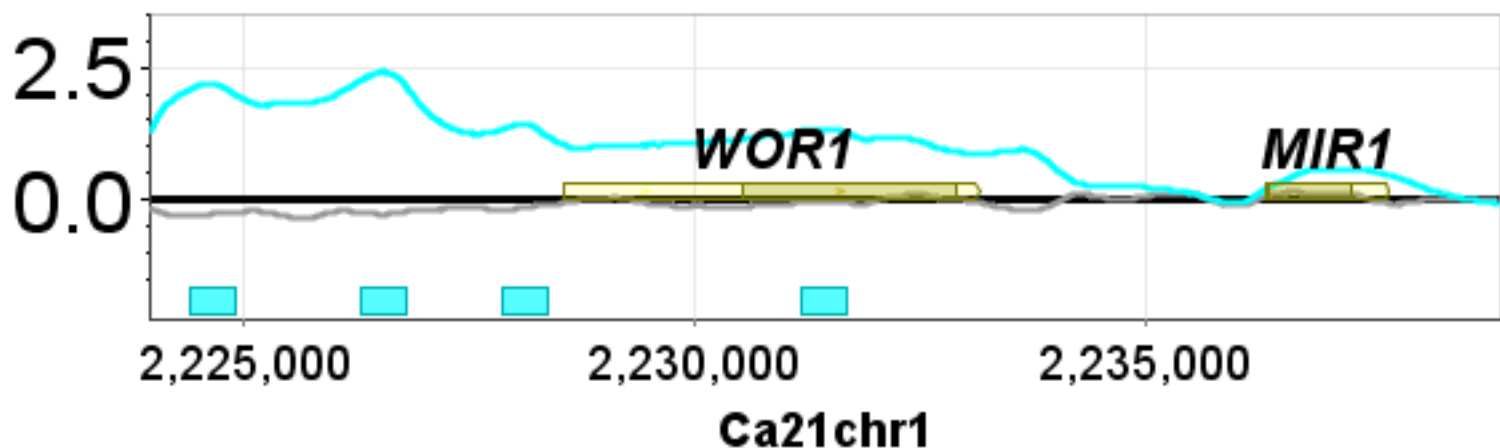

[1.329] Ca21chr1:1070165-1085164 [+] [GAT2, orf19.4057, orf19.4059, orf19.450]

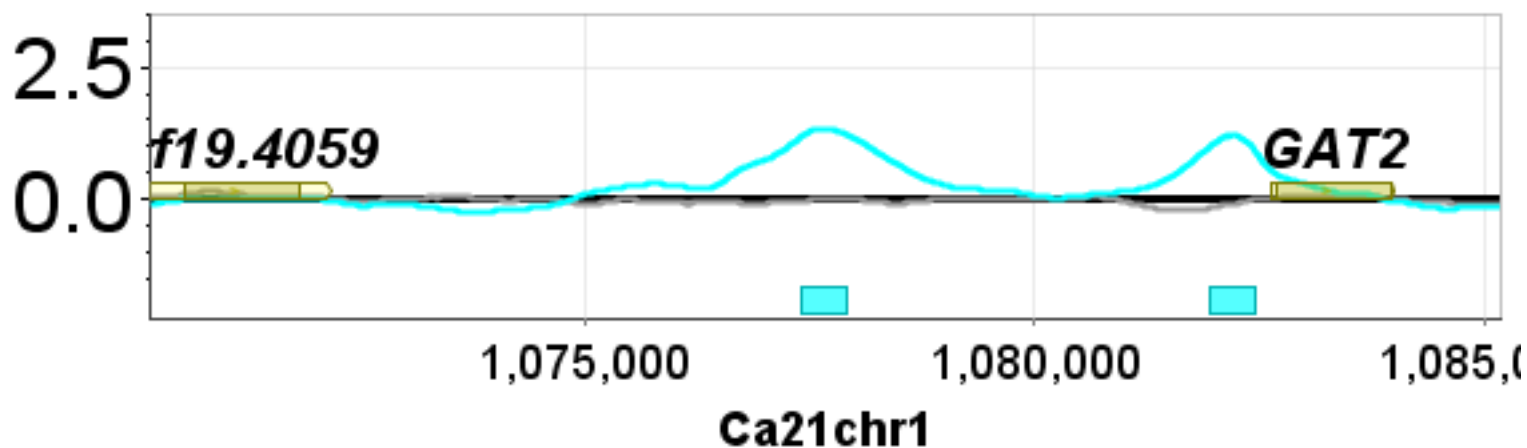

[1.311] Ca21chr5:108732-123731 [+] [AGA1, orf19.934, orf19.933]

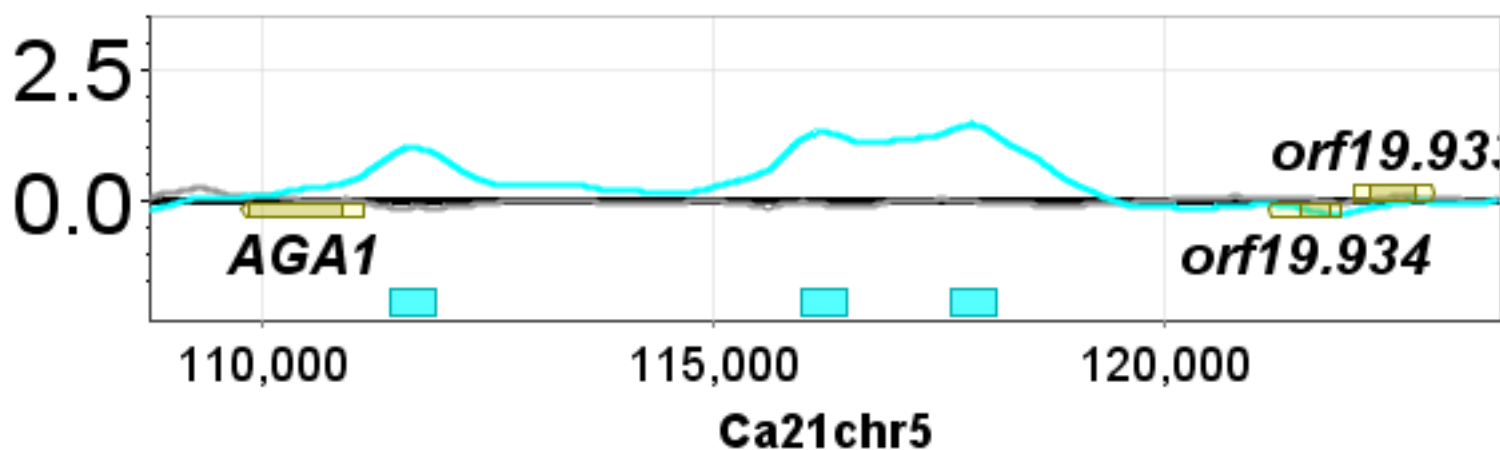

[1.276] Ca21chr2:196826-211825 [+] [ntar\_303, orf19.2002, HNM1, orf19.2001, ntar\_302]

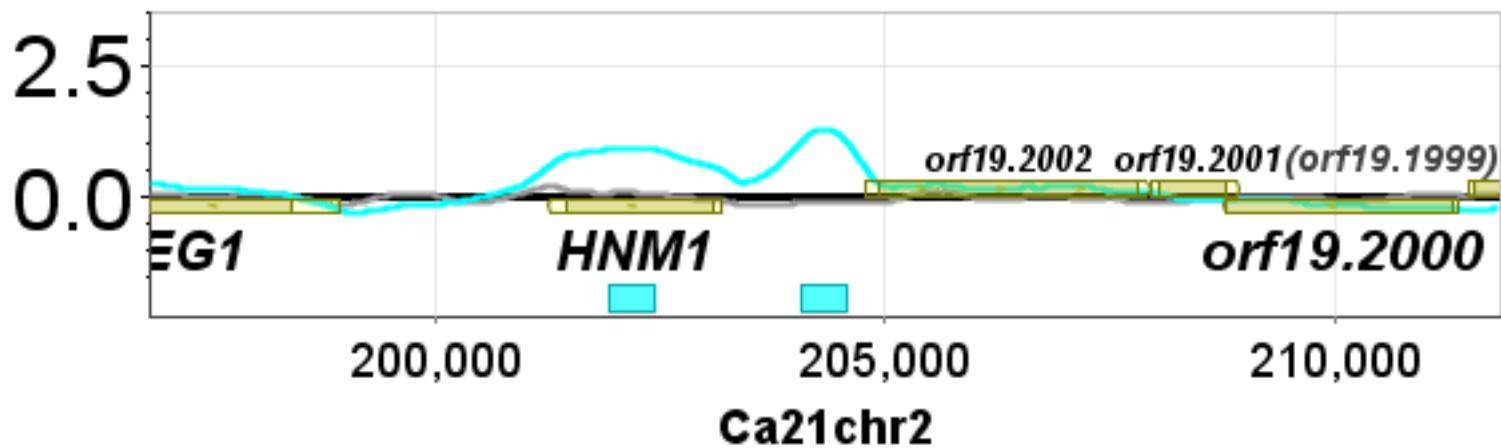

[1.265] Ca21chr5:763078-778077 [+] [ite(uuc)5, orf19.2638, orf19.2639, orf19.2639.1, FUR1]

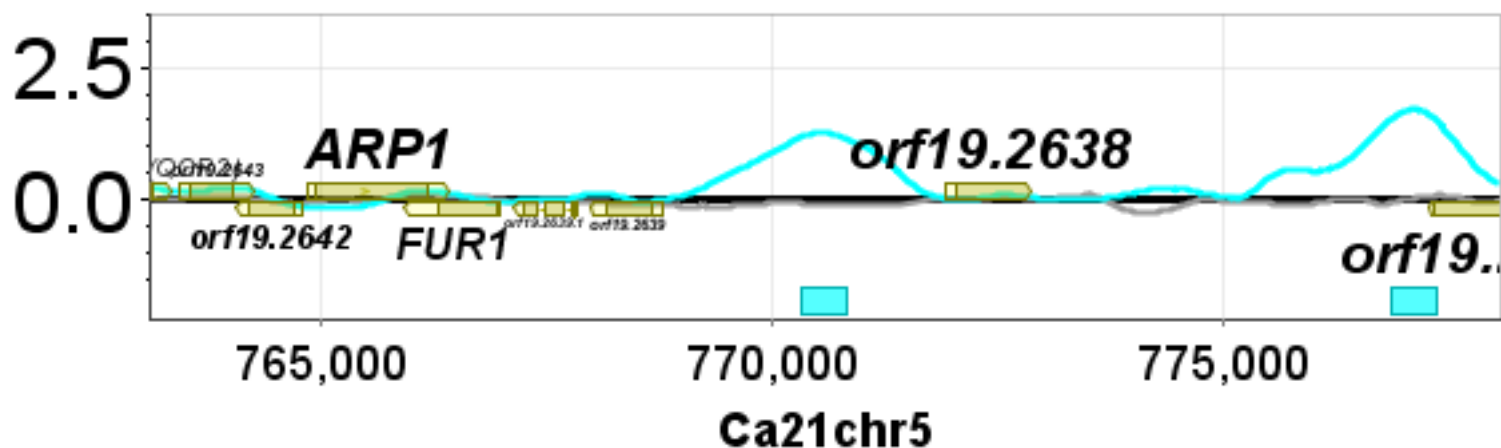

[1.254] Ca21chr1:1668692-1683691 [+] [VRG4, ADE4, ntar\_155, orf19.1229, ntar\_156]

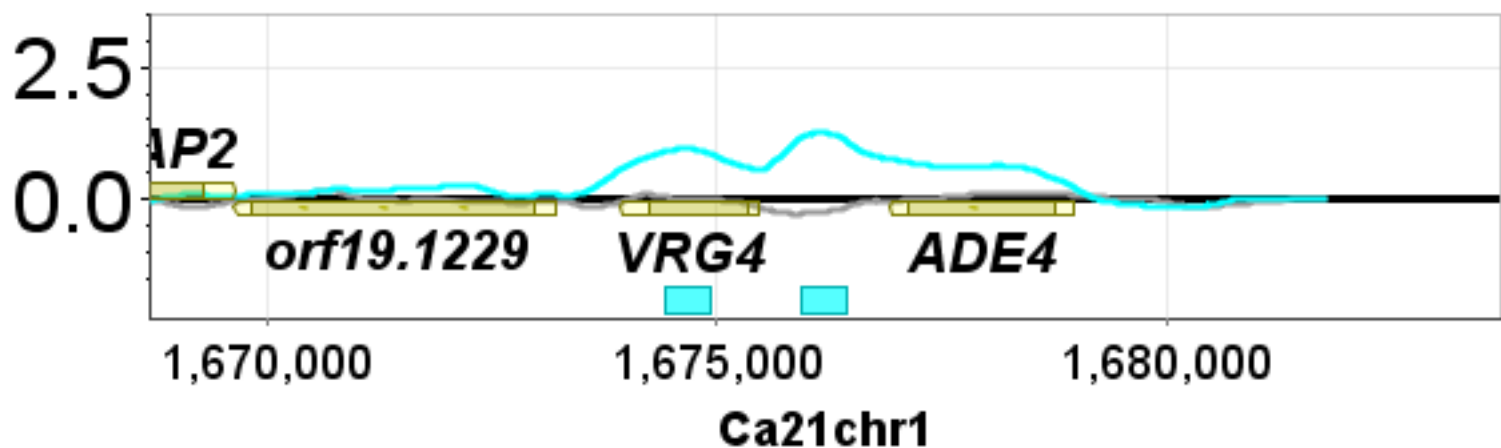

[1.253] Ca21chrR:1307981-1322980 [+] [orf19.3868, orf19.3869, ntar\_1302, ntar\_1301, ADE13]

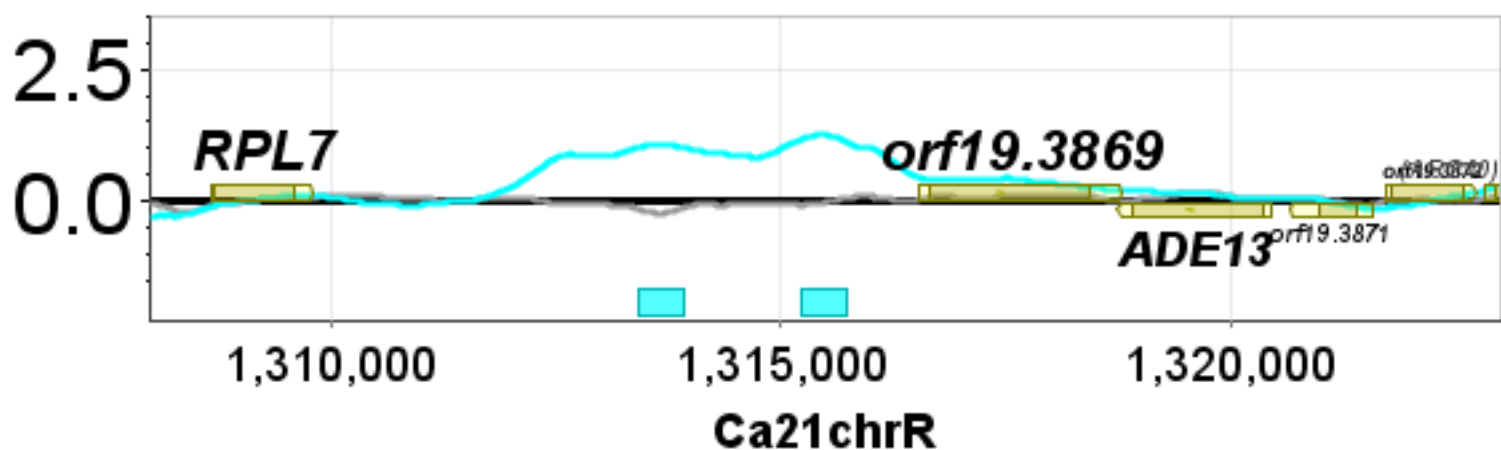

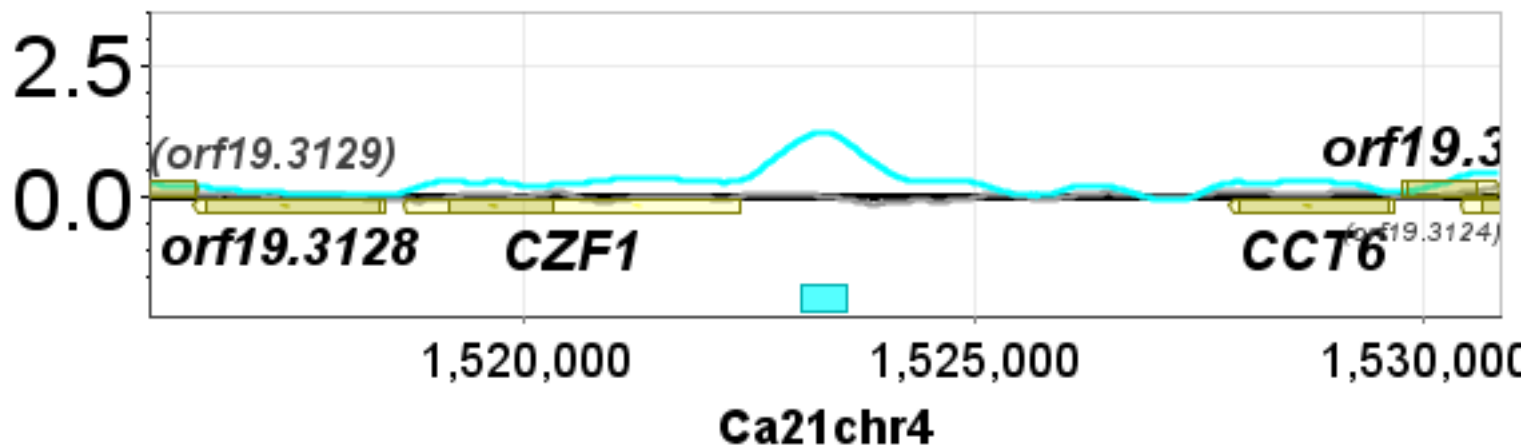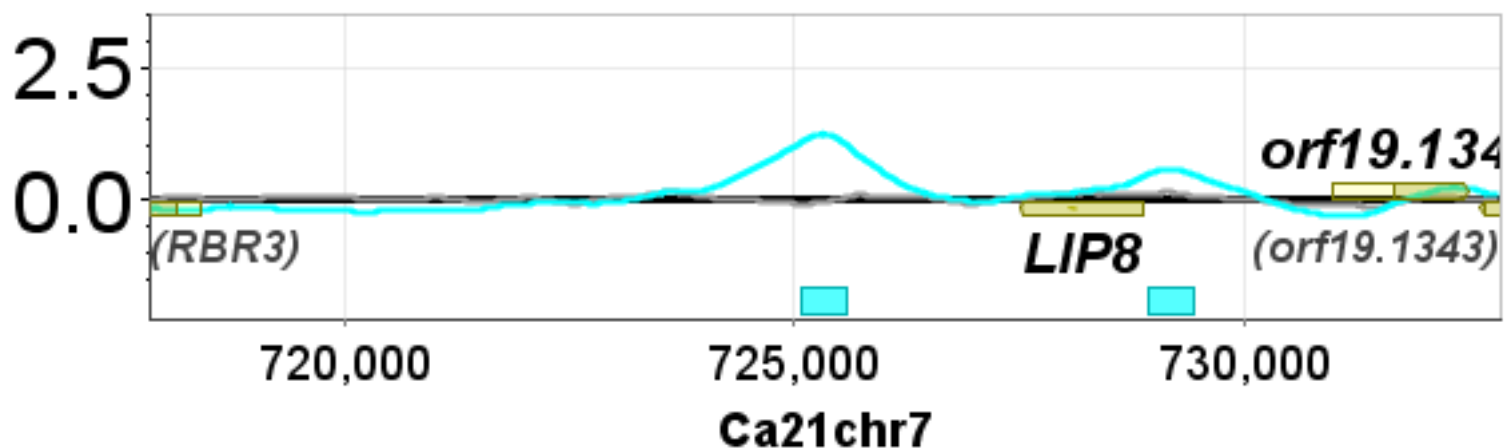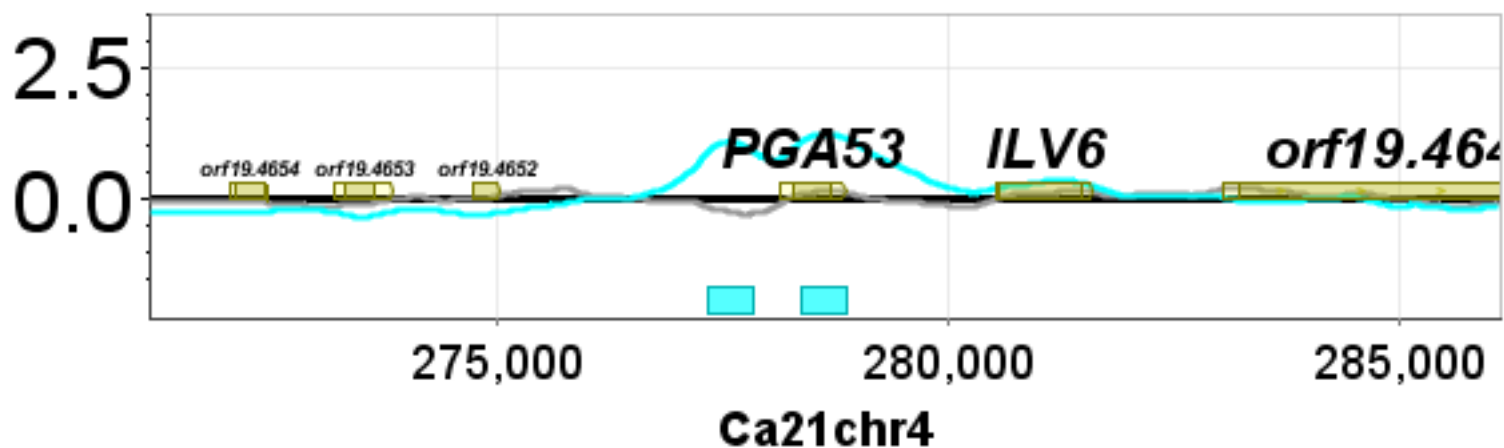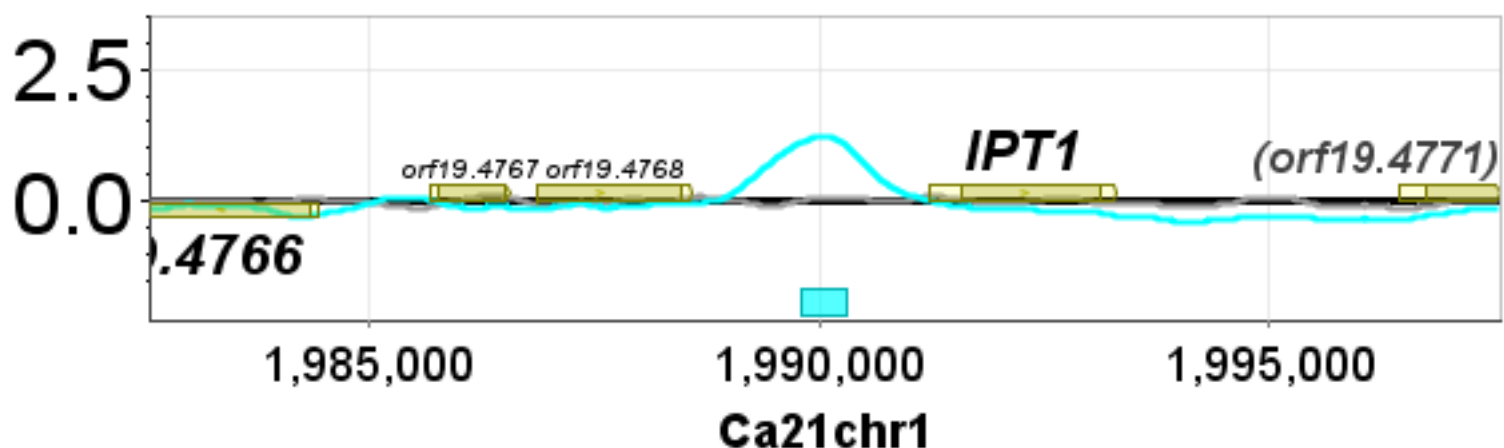

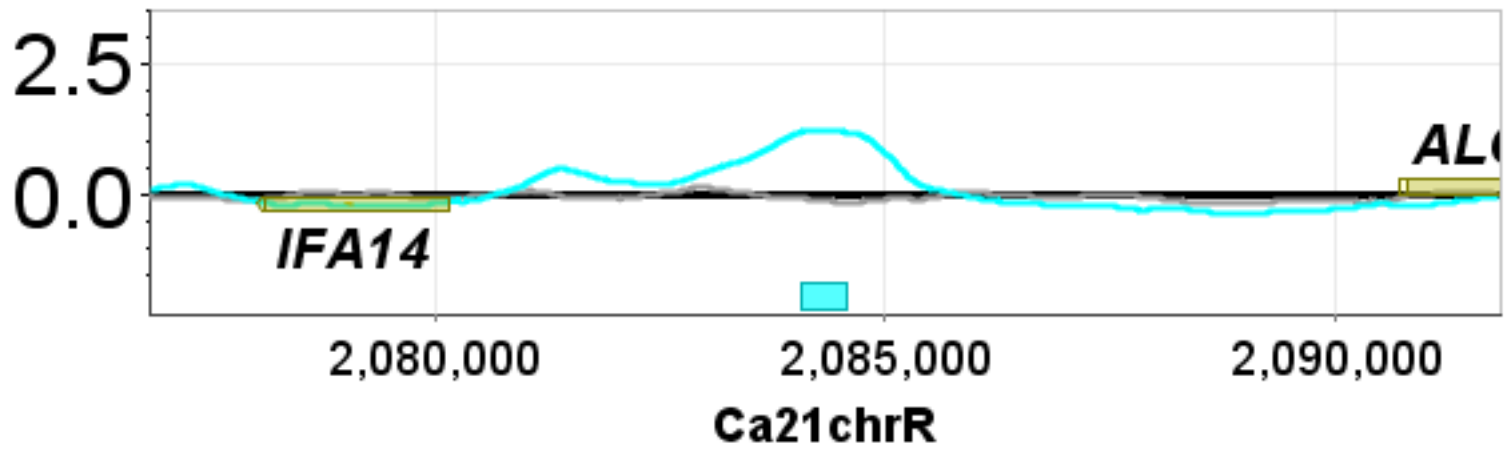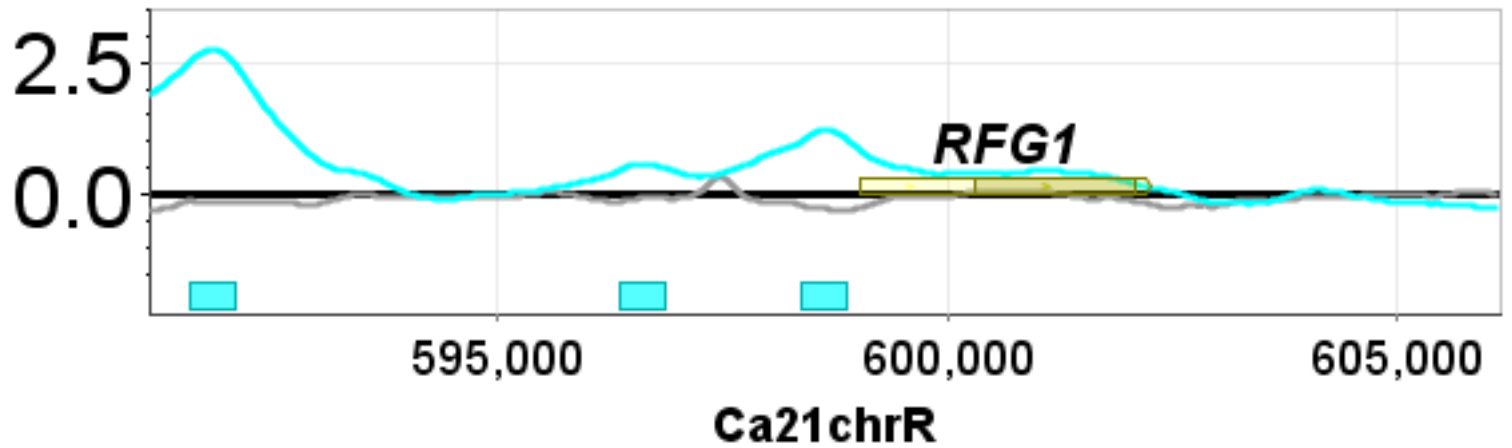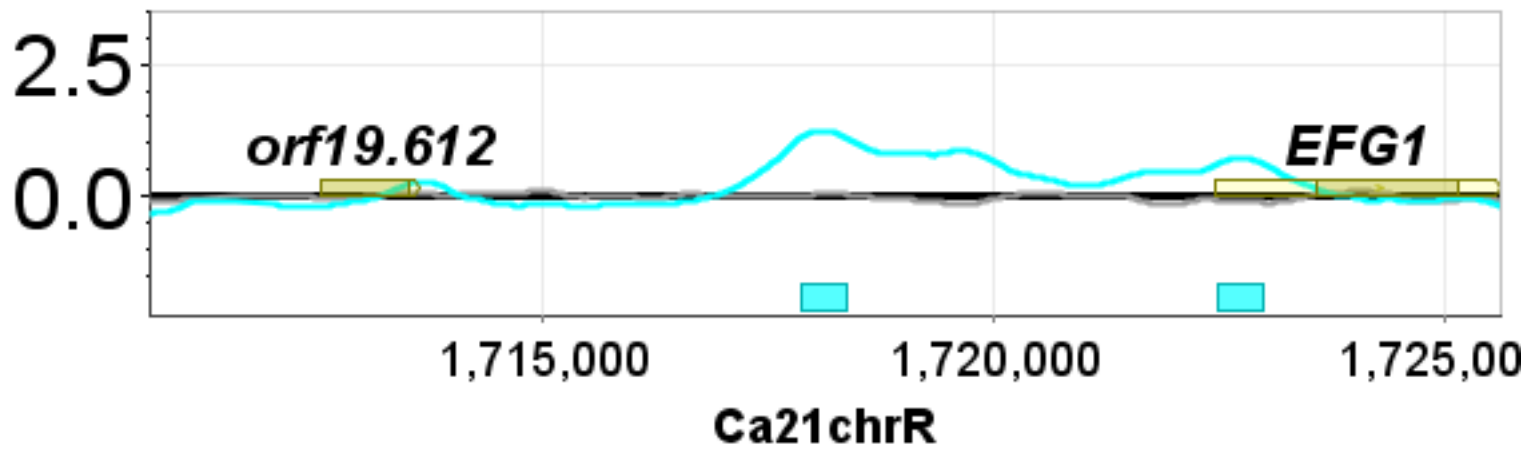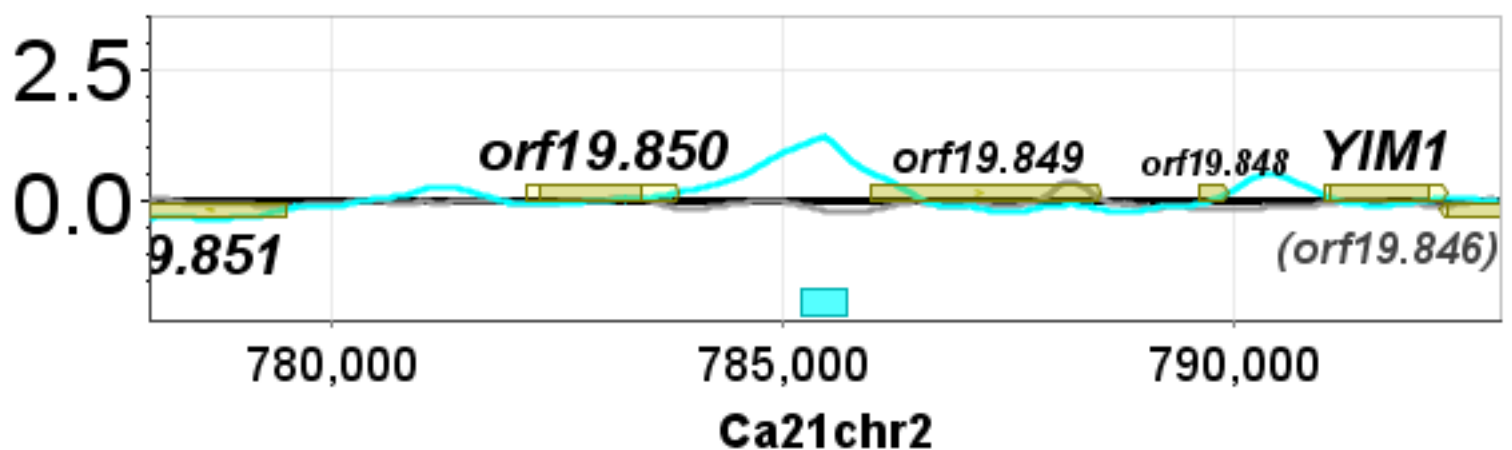

[1.196] Ca21chr1:1074697-1089696 [+] [GAT2, orf19.450, ntar\_104]

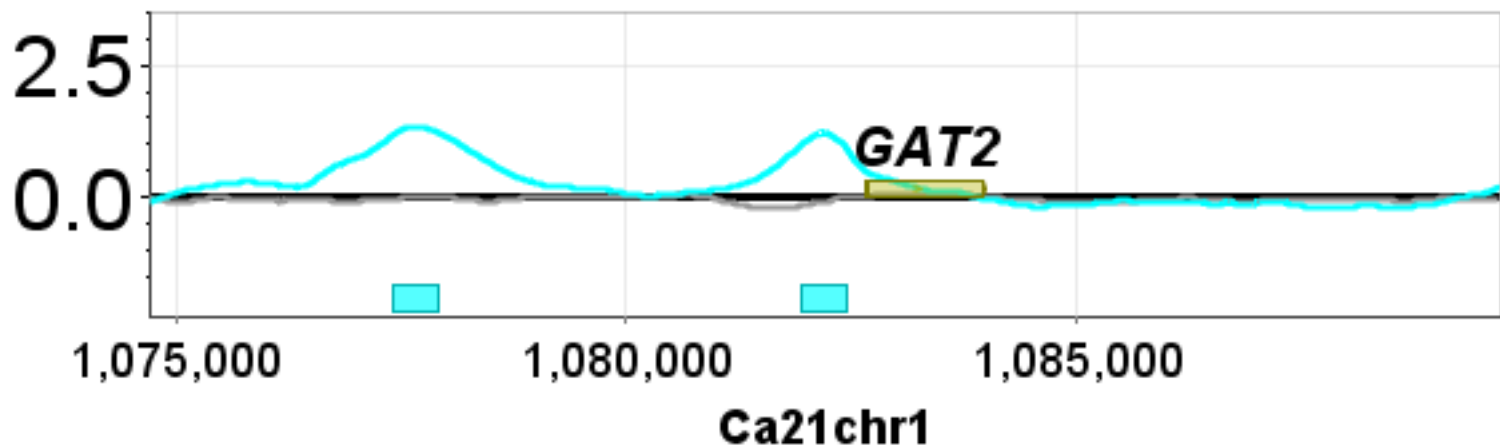

[1.193] Ca21chrR:872423-887422 [+] [orf19.467, ntar\_1253, ntar\_1254, ntar\_1255, HST7]

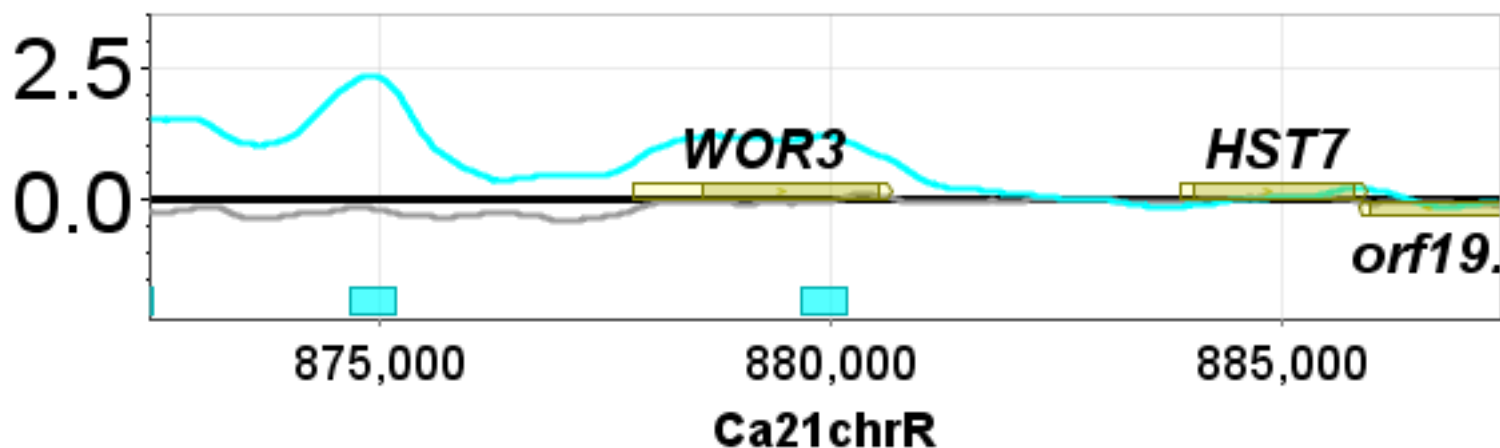

[1.185] Ca21chr2:1739974-1754973 [+] [YWP1, ntar\_452, ntar\_453, ntar\_451, orf19.3617]

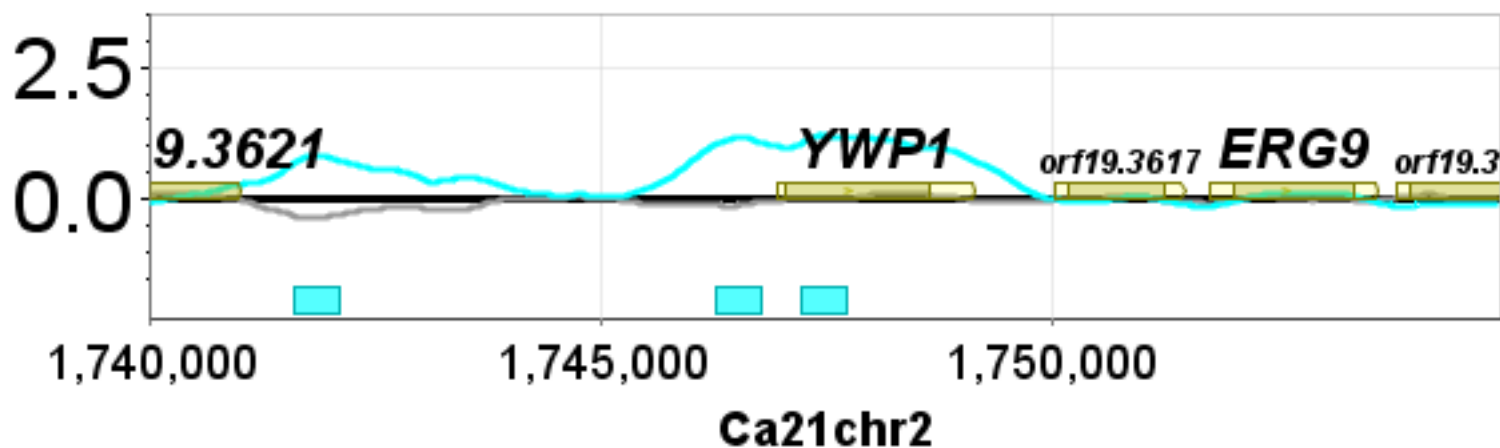

[1.182] Ca21chr2:1739032-1754031 [+] [YWP1, ntar\_452, ntar\_451, ntar\_449, ntar\_450]

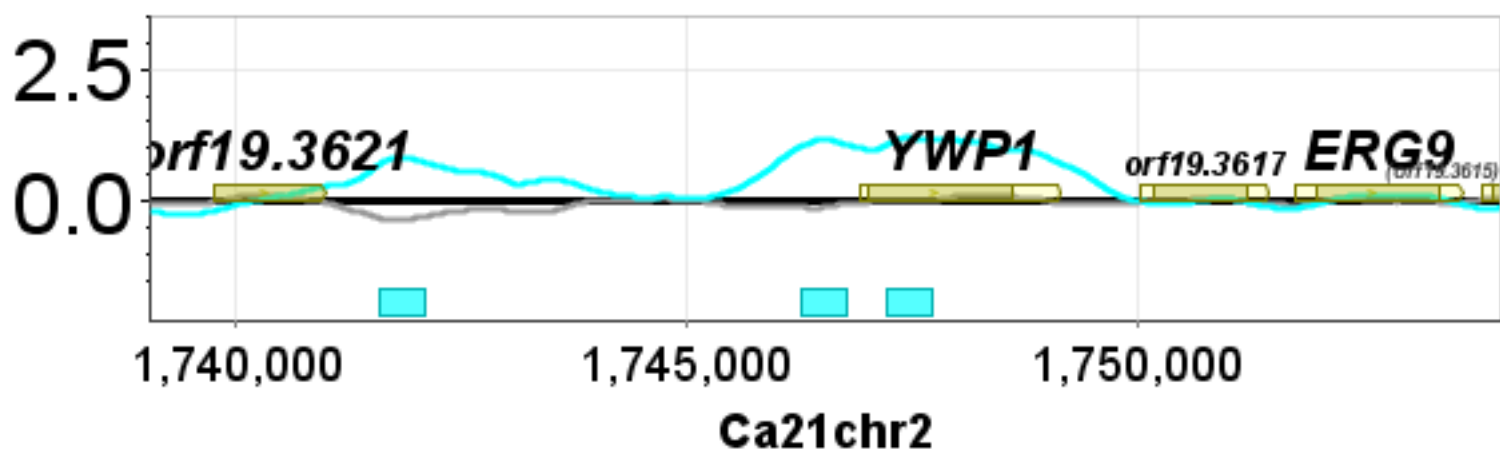

[1.18] Ca21chr1:2341308-2356307 [+] [orf19.1831, ntar\_222, FCY23, ntar\_221, ntar\_223]

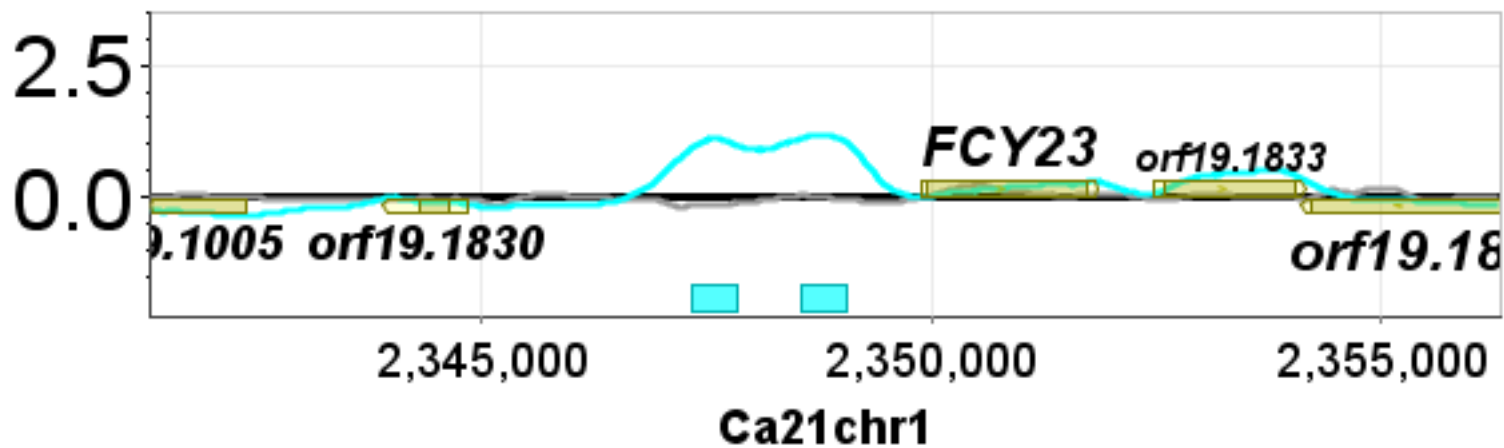

[1.161] Ca21chr3:1112330-1127329 [+] [WOR2, ntar\_614, ntar\_615, ntar\_616, ntar\_617]

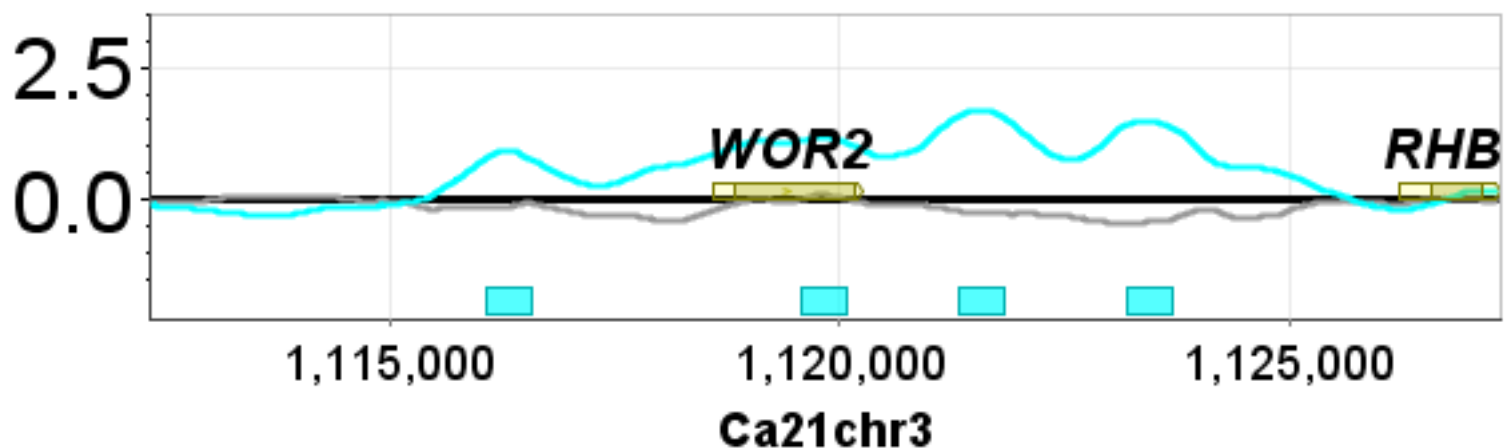

[1.124] Ca21chrR:1404008-1419007 [+] [ntar\_1310, RGS2, ntar\_1311, ntar\_1312, ntar\_1314]

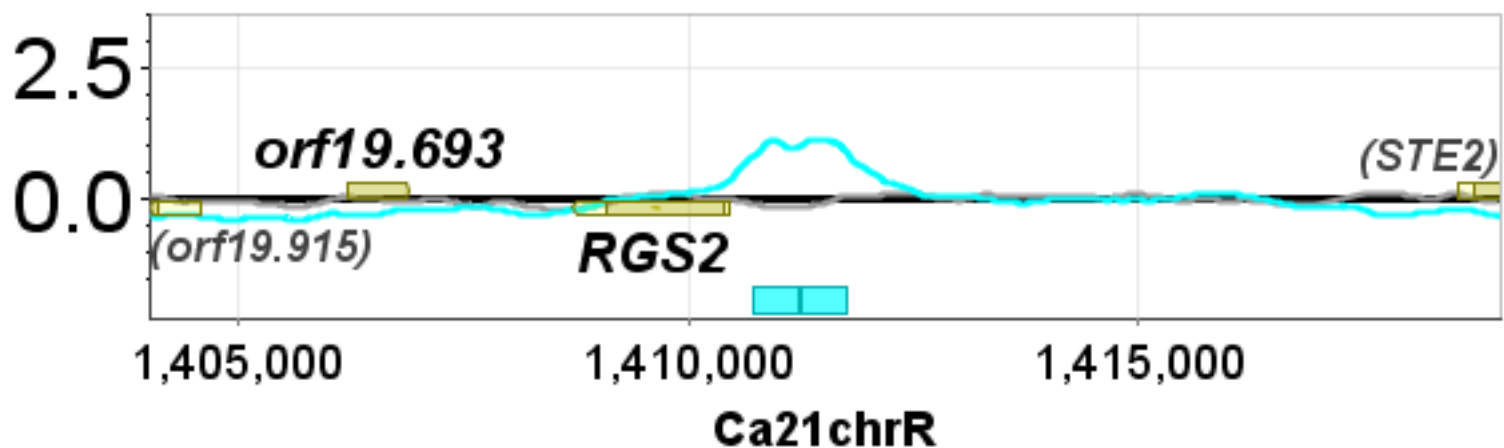

[1.115] Ca21chr5:917022-932021 [+] [orf19.3897, ntar\_941, CHT2, orf19.3898, SDC1]

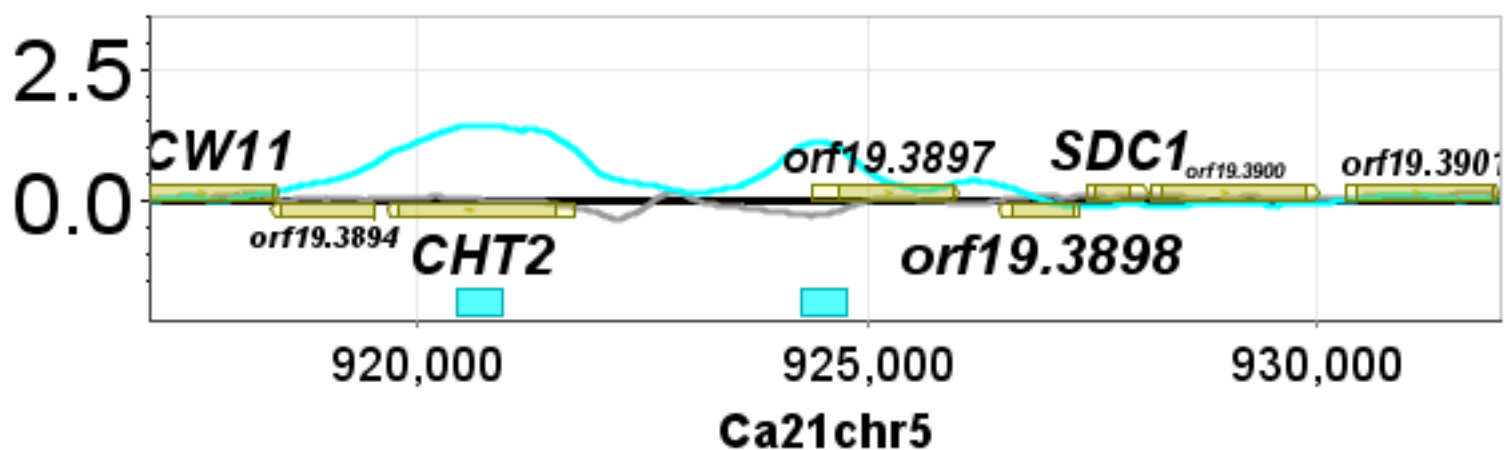



[1.109] Ca21chrR:1403473-1418472 [+] [RGS2, ntar\_1310, ntar\_1311, ntar\_1312, orf19.693]

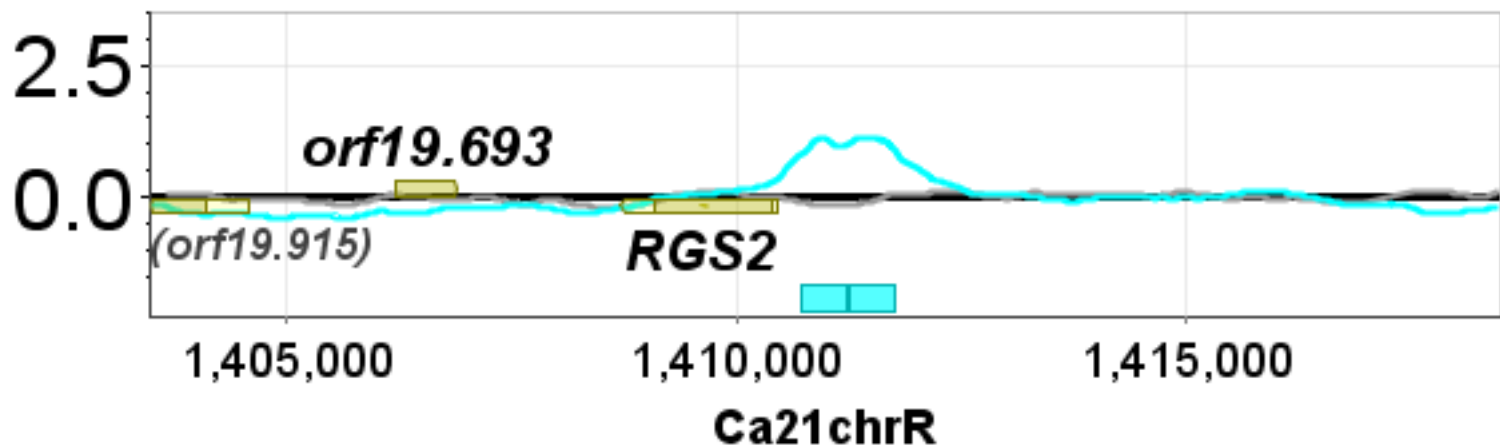

[1.102] Ca21chr6:163378-178377 [+] [ILV5, orf19.89, ntar\_976, ntar\_975, GPX1]

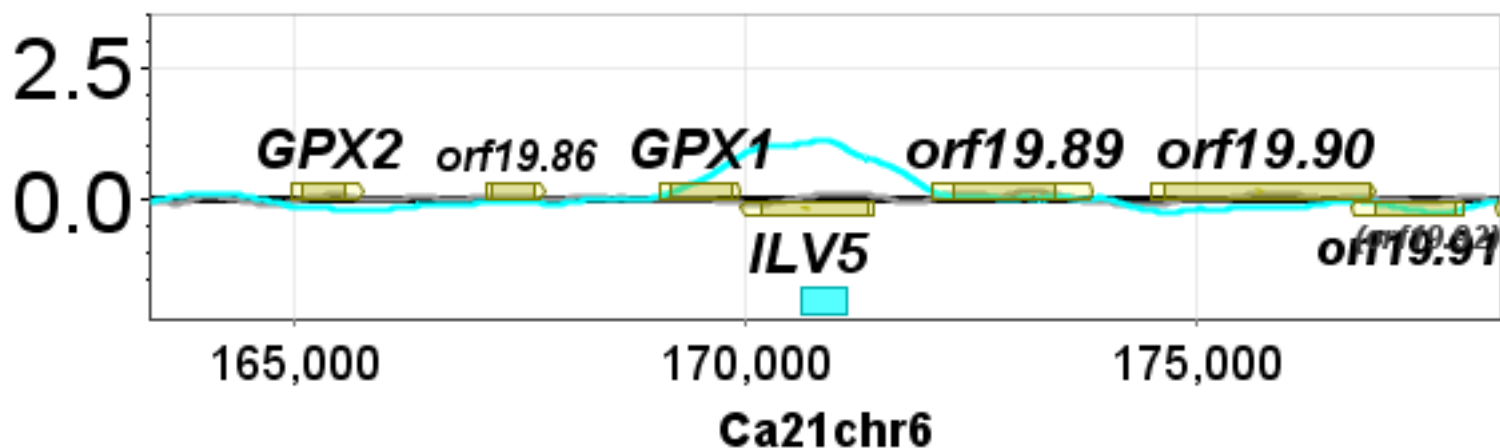

[1.099] Ca21chr1:2340104-2355103 [+] [ntar\_222, ntar\_221, orf19.1831, FCY23, ntar\_220]

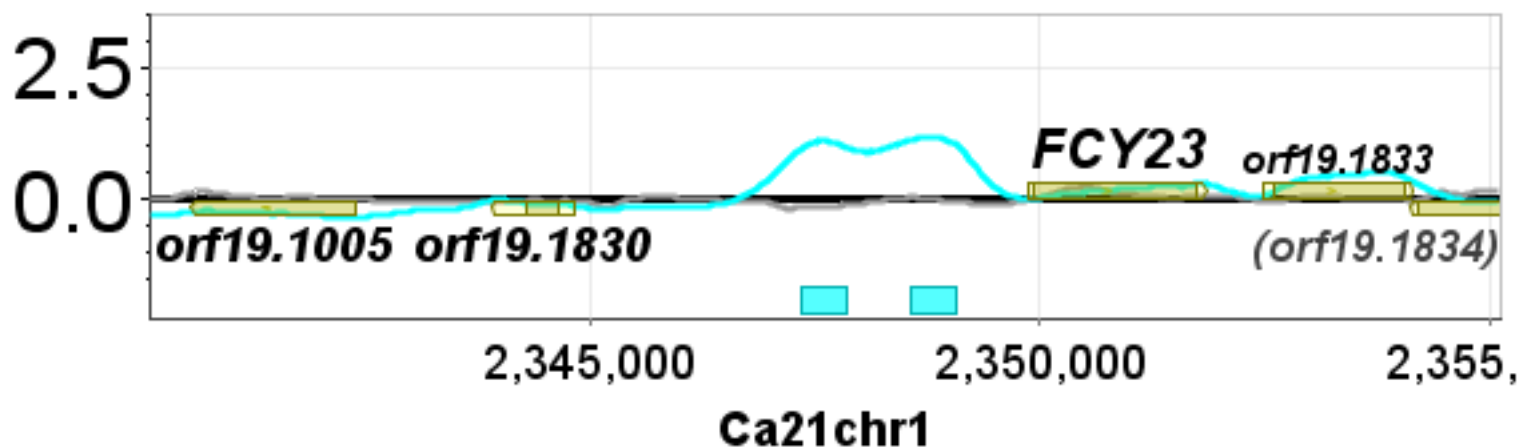

[1.087] Ca21chr4:270084-285083 [+] [ntar\_734, PGA53, ntar\_733, ntar\_735, orf19.4652]

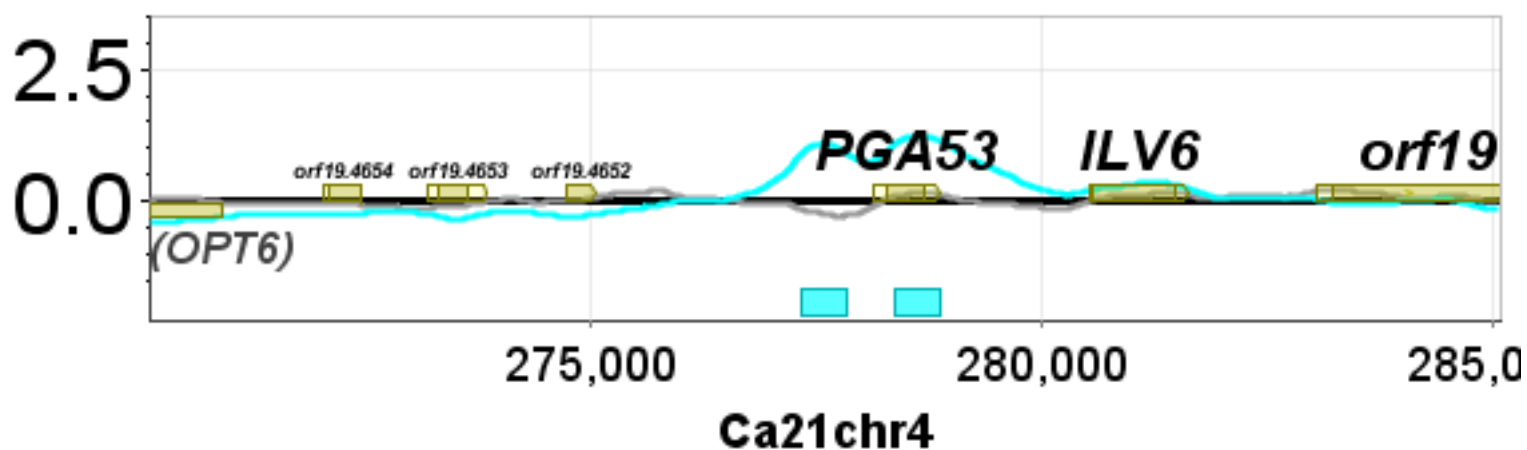

[1.077] Ca21chrR:1306162-1321161 [+] [ntar\_1302, orf19.3868, orf19.3869, ntar\_1301, ntar\_1300]

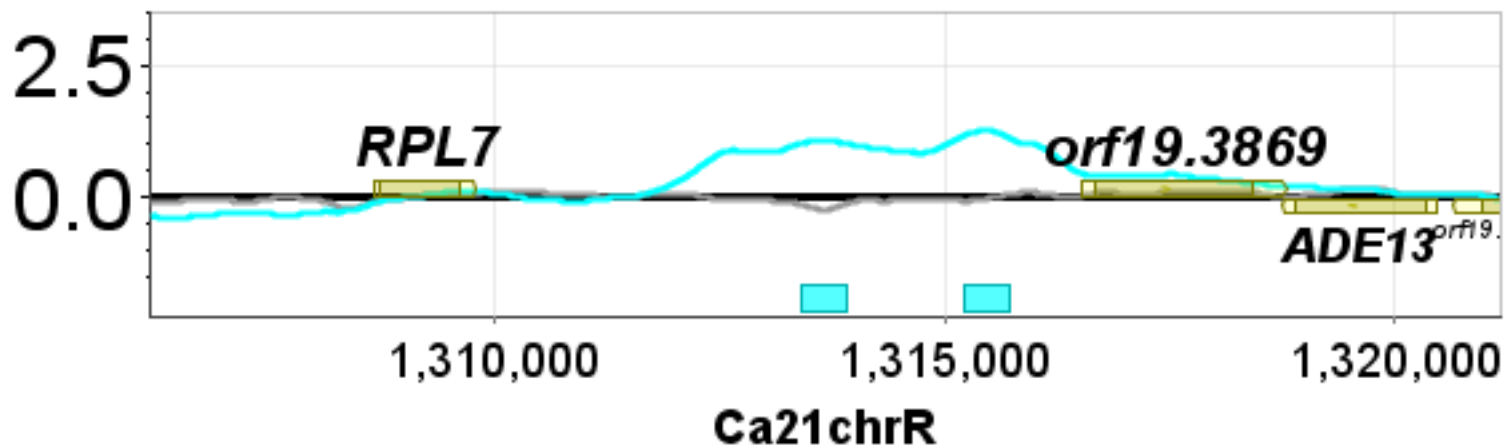

[1.061] Ca21chr2:517048-532047 [+] [ZRT2, ntar\_335, FGR22, ntar\_334, orf19.1584]

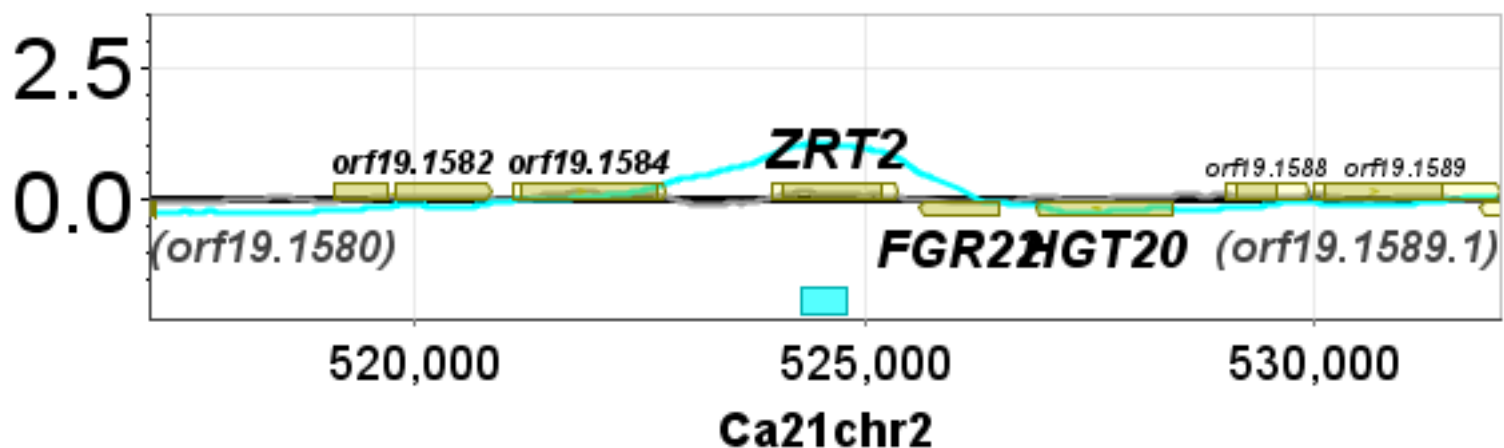

[1.052] Ca21chr5:888015-903014 [+] [orf19.1286, ntar\_940, orf19.1285, orf19.1287, ntar\_939]

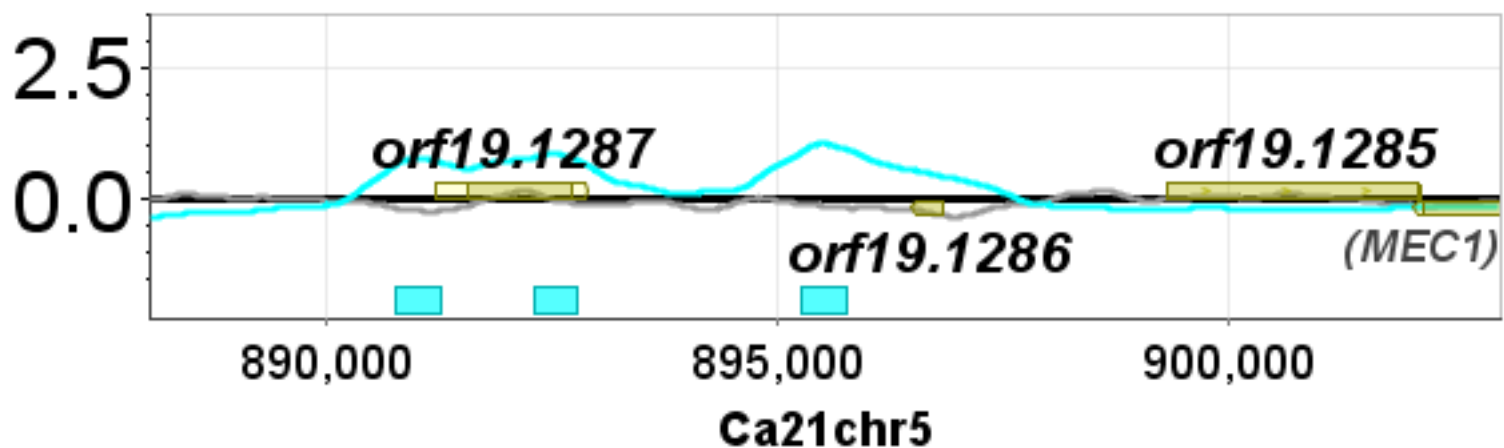

[1.052] Ca21chrR:259556-274555 [+] [ntar\_1179.1, ntar\_1179.2, ntar\_1178, ntar\_1180, ntar\_1179.3]

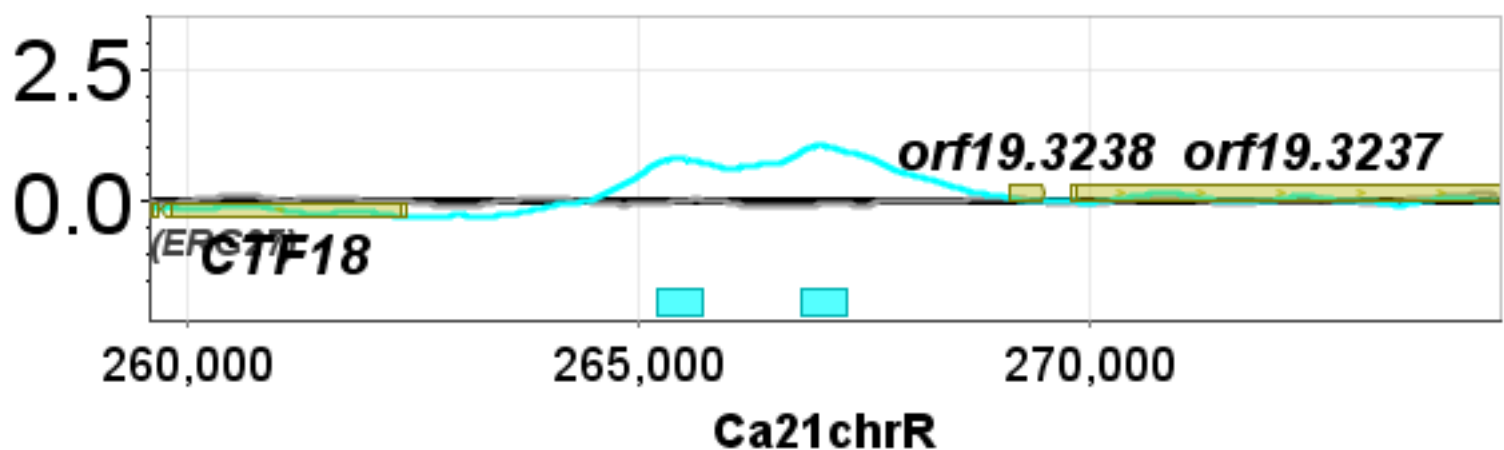

[1.051] Ca21chrR:579565-594564 [+] [orf19.2822, orf19.2821, orf19.2820, orf19.2818, orf19.2819]

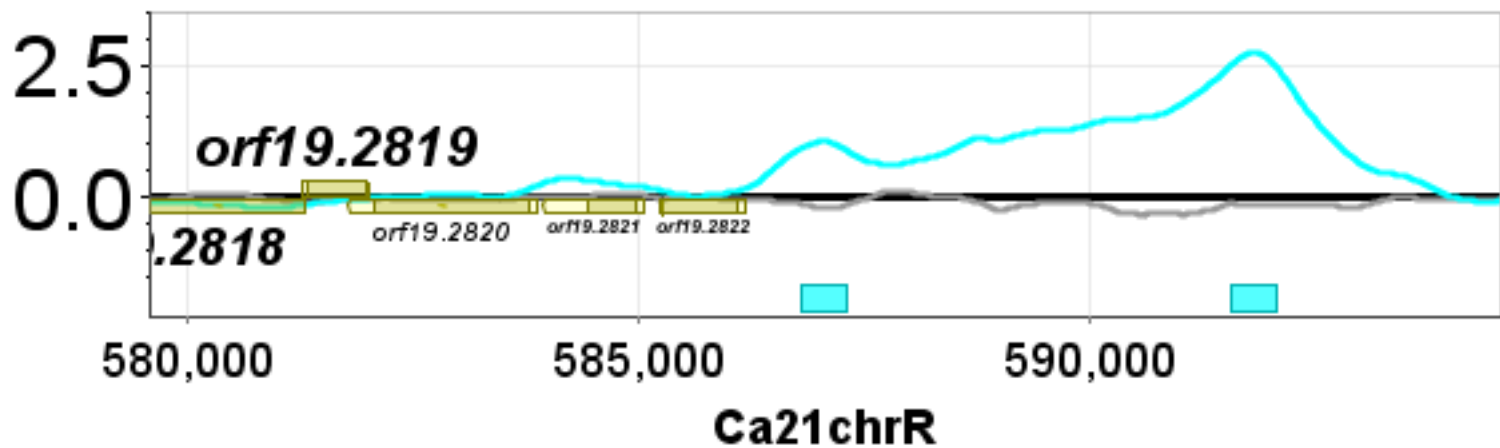

[1.05] Ca21chr2:725198-740197 [+] [Intar\_353, orf19.871, orf19.872, orf19.873]

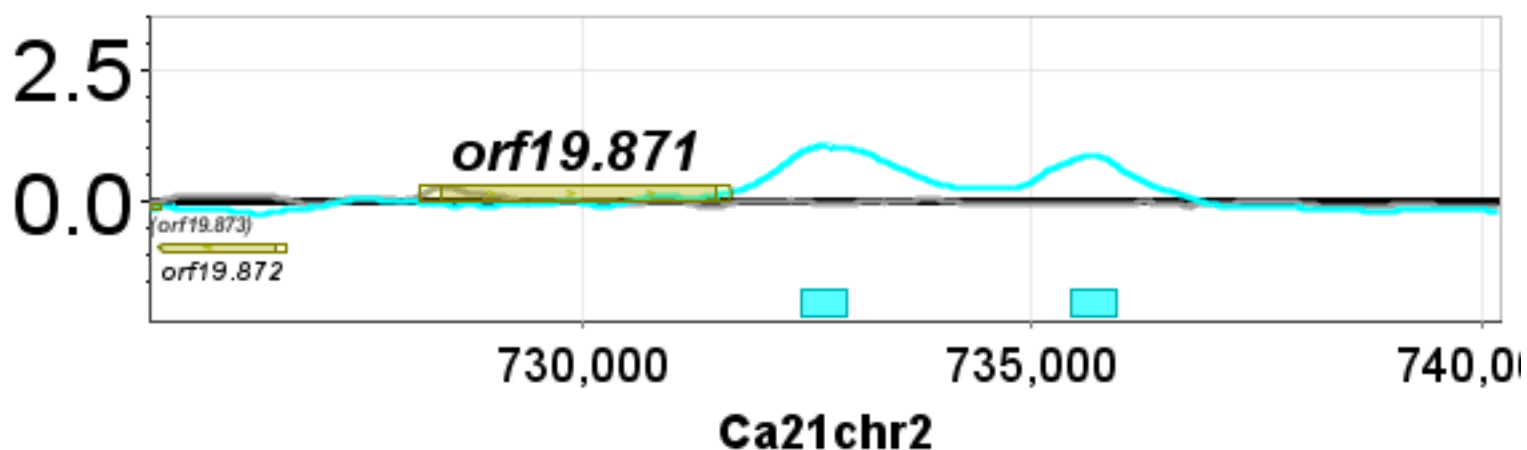

[1.047] Ca21chr1:440653-455652 [+] [ntar\_43, ntar\_42, GAL1, orf19.3671, SHA3]

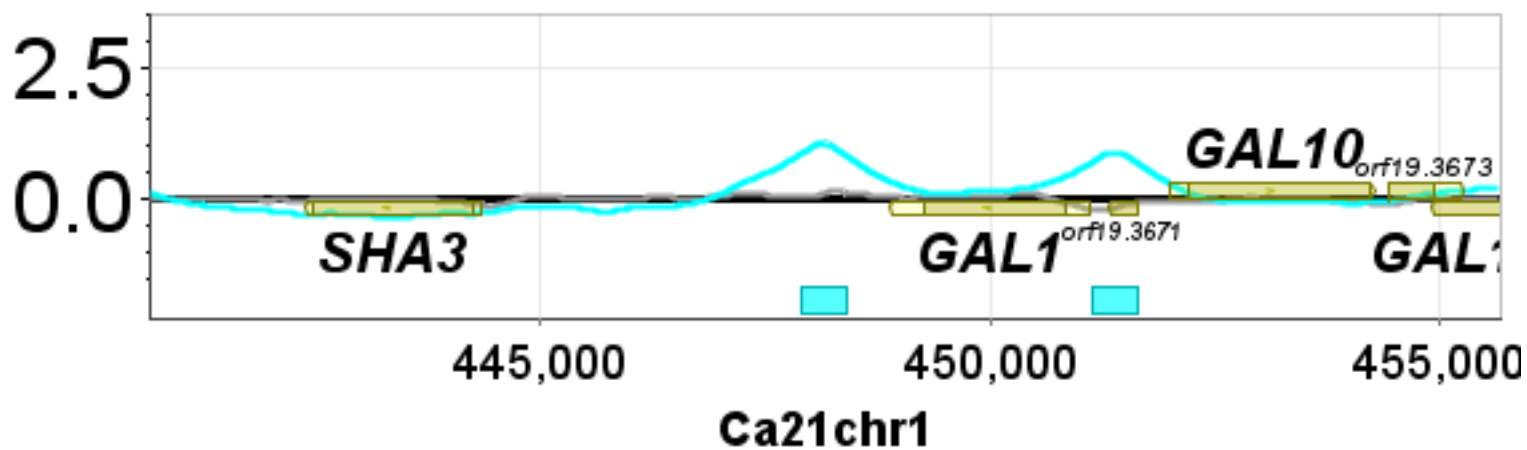

[1.04] Ca21chr4:1374377-1389376 [+] [orf19.2920, snrnau4, orf19.2921, orf19.2922, orf19.2923]

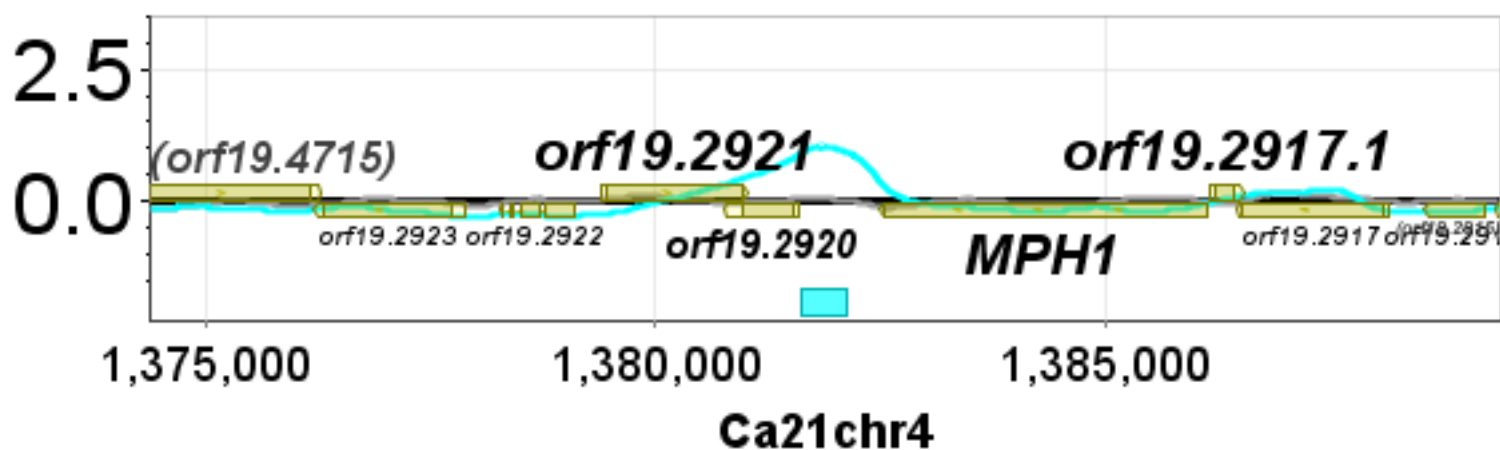

[1.031] Ca21chrR:2103635-2118634 [+] [BET2, DEF1, DPB2, GNP3]

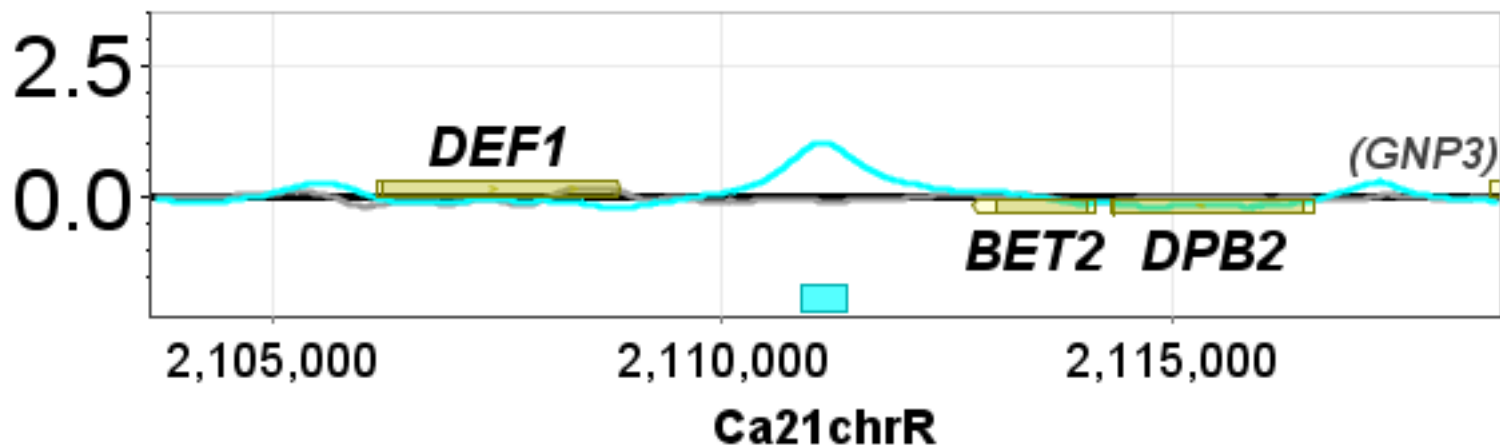

[1.023] Ca21chr7:853829-868828 [+] [RPP1B, OGG1, orf19.7192, MAM33, orf19.7193]

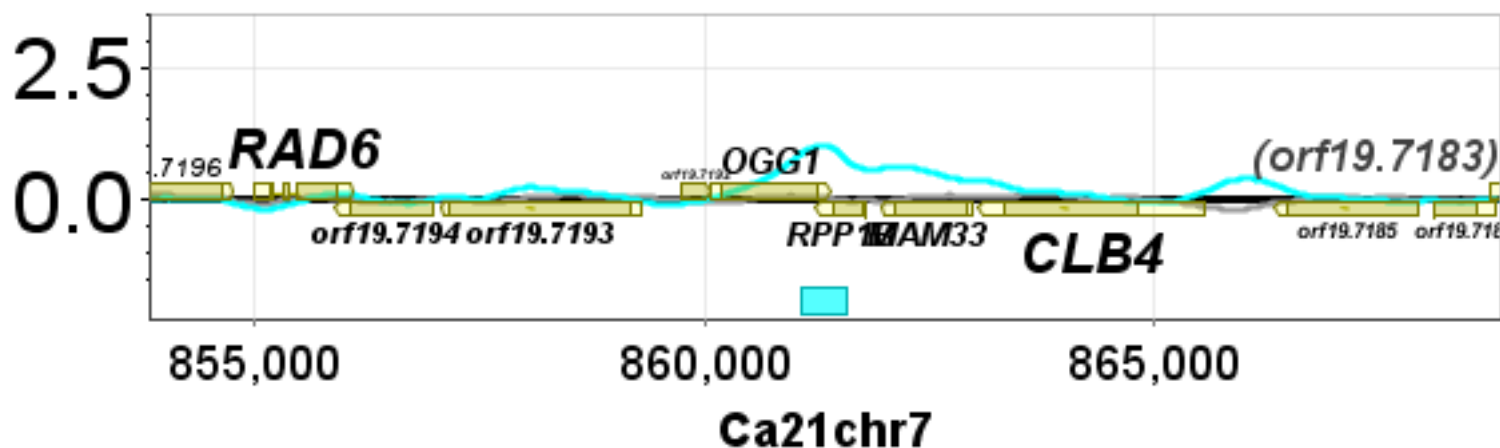

[1.022] Ca21chr1:2215601-2230600 [+] [ntar\_207, orf19.4883, WOR1, ntar\_206, orf19.4882]

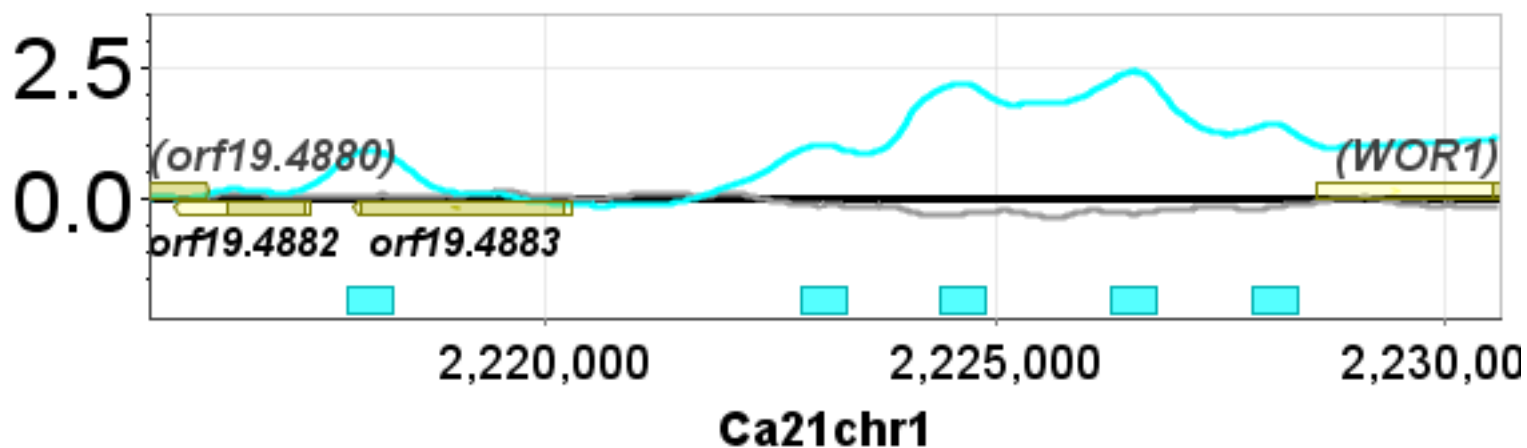

[1.022] Ca21chr6:661197-676196 [+] [ntar\_1017, MDR1, BMT6, orf19.5605, orf19.5606]

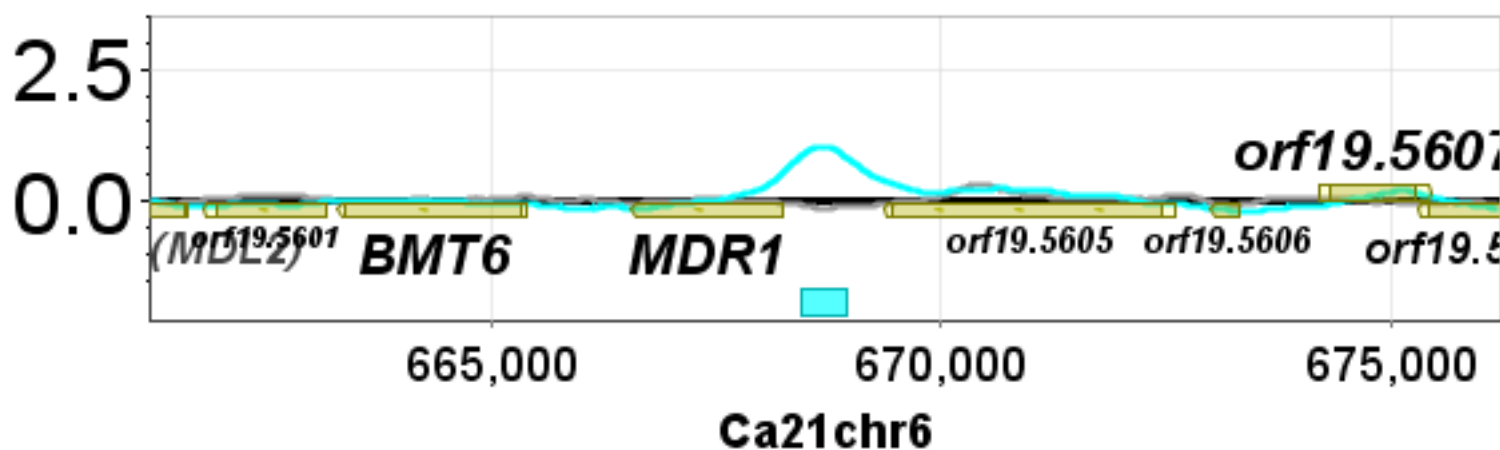

[1.017] Ca21chr5:104154-119153 [+] [AGA1, ntar\_854, orf19.936, orf19.937, orf19.938]

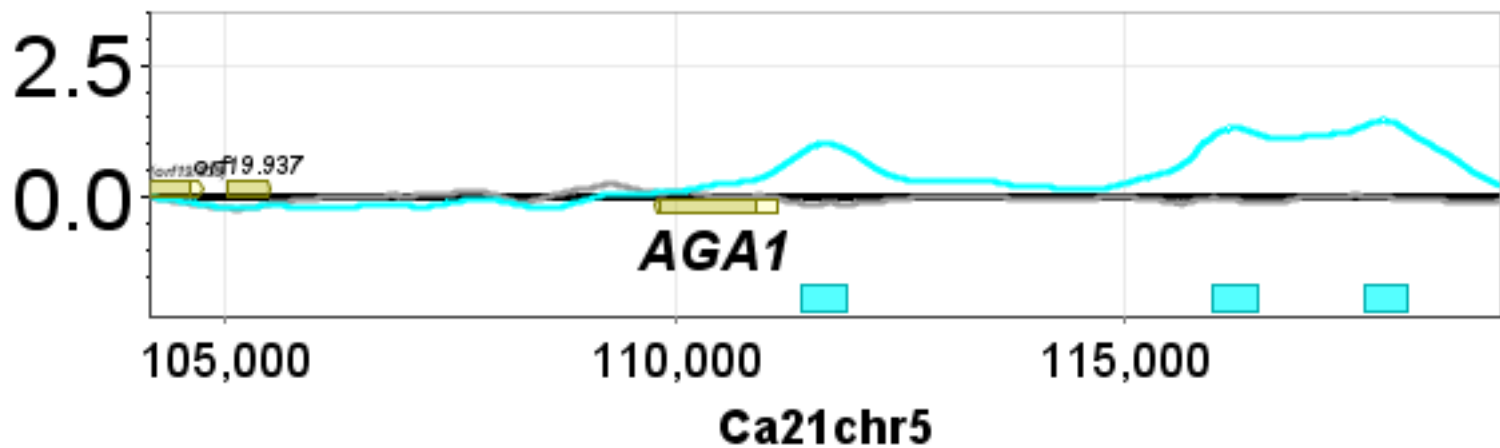

[1.004] Ca21chr5:216129-231128 [+] [orf19.1968, orf19.1968.1, orf19.1967, CCW14, BUD23]

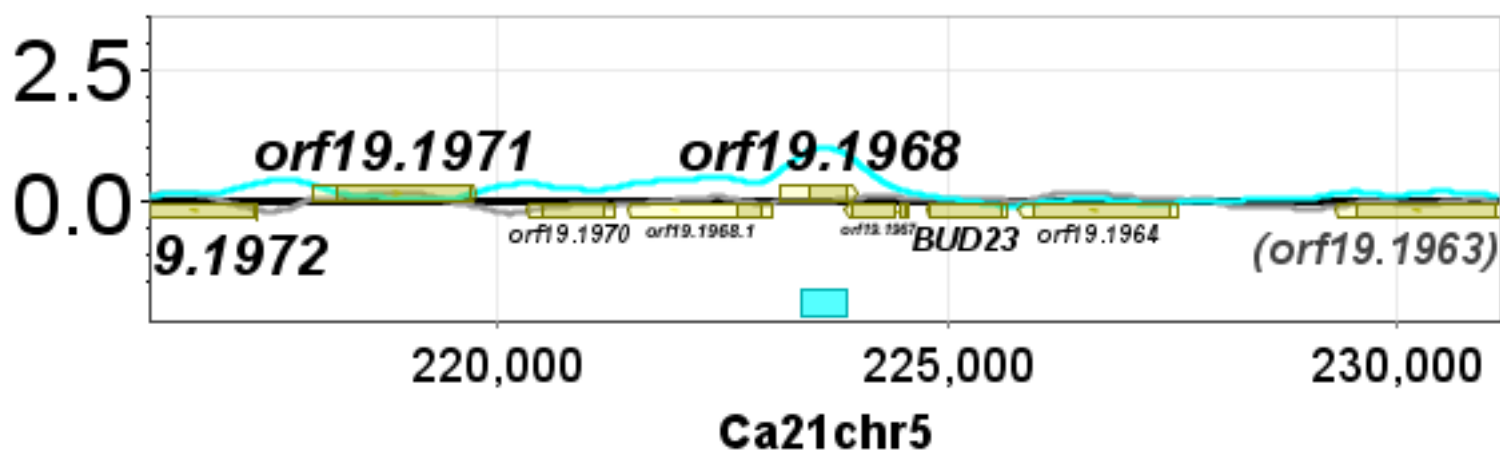

[0.987] Ca21chr5:489372-504371 [+] [PTH2, ntar\_890, orf19.4230, orf19.4229, PTH1]

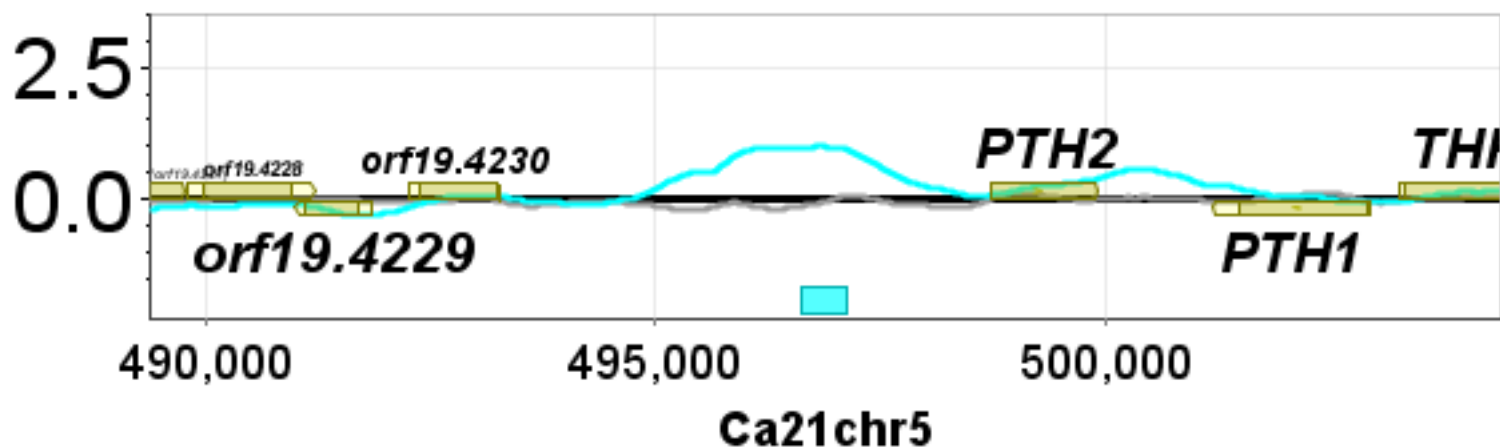

[0.977] Ca21chr1:700135-715134 [+] [orf19.3037, ntar\_73, TPS2, EHT1, orf19.3035]

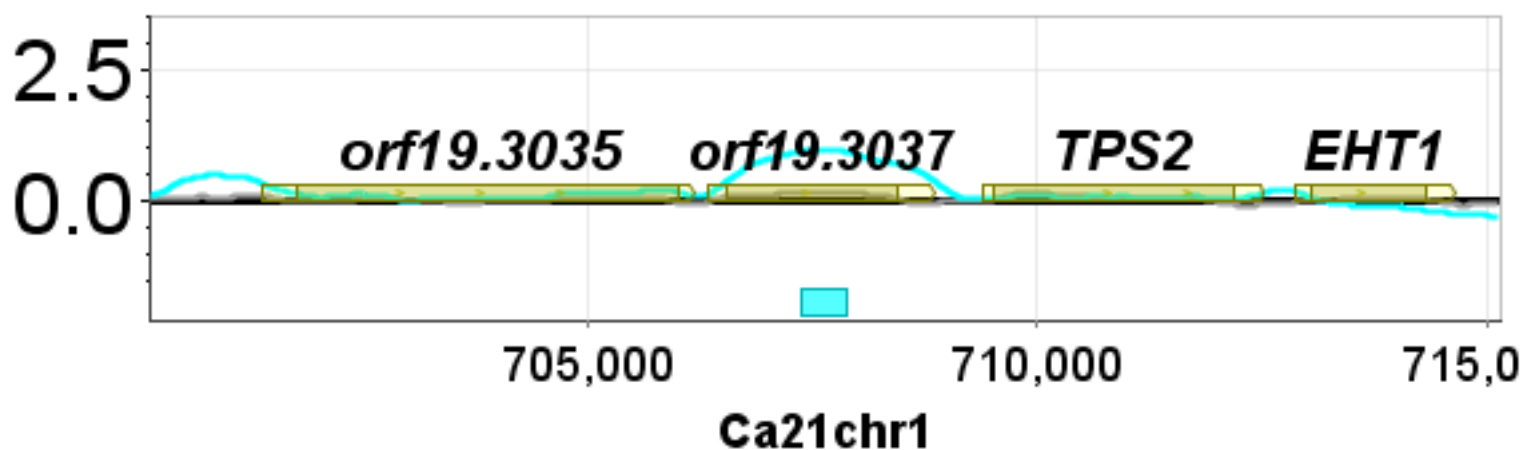

[0.973] Ca21chr1:1218130-1233129 [+] [orf19.2459, orf19.2460, PRN4, orf19.2458, PRN3]

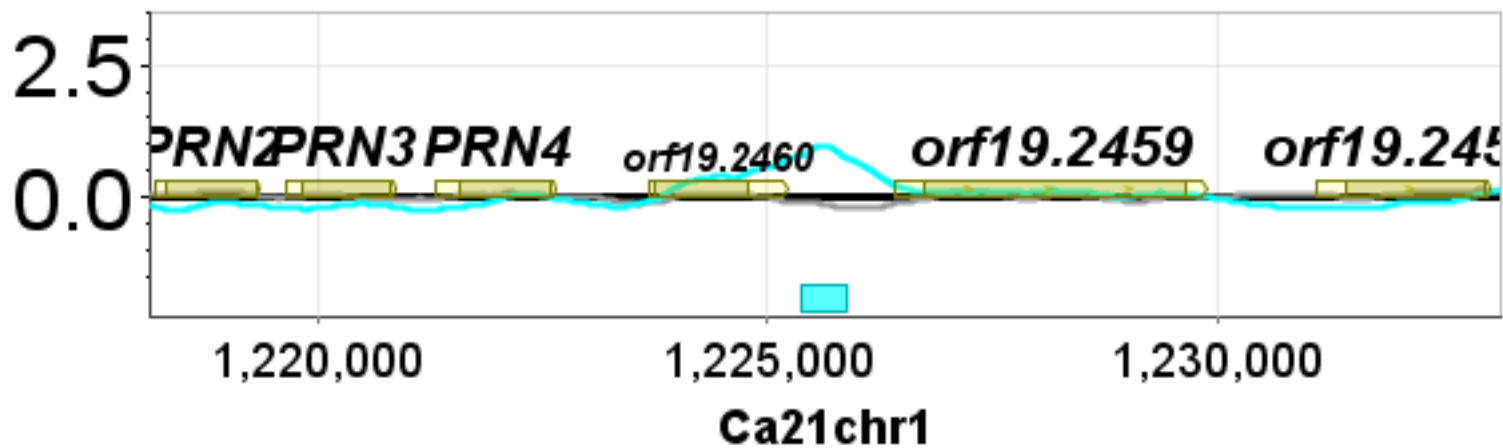

[0.965] Ca21chrR:2092825-2107824 [+] [IFGR46, YTA6, orf19.7556, orf19.7555, orf19.7554]

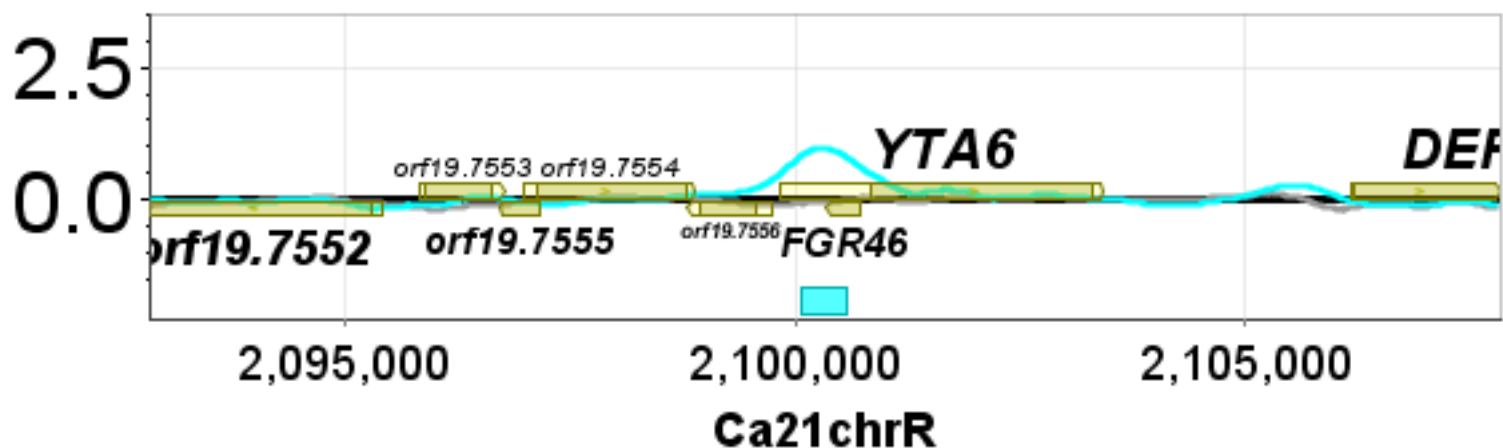

[0.95] Ca21chr1:1327342-1342341 [+] [ntar\_127, orf19.177, orf19.6280]

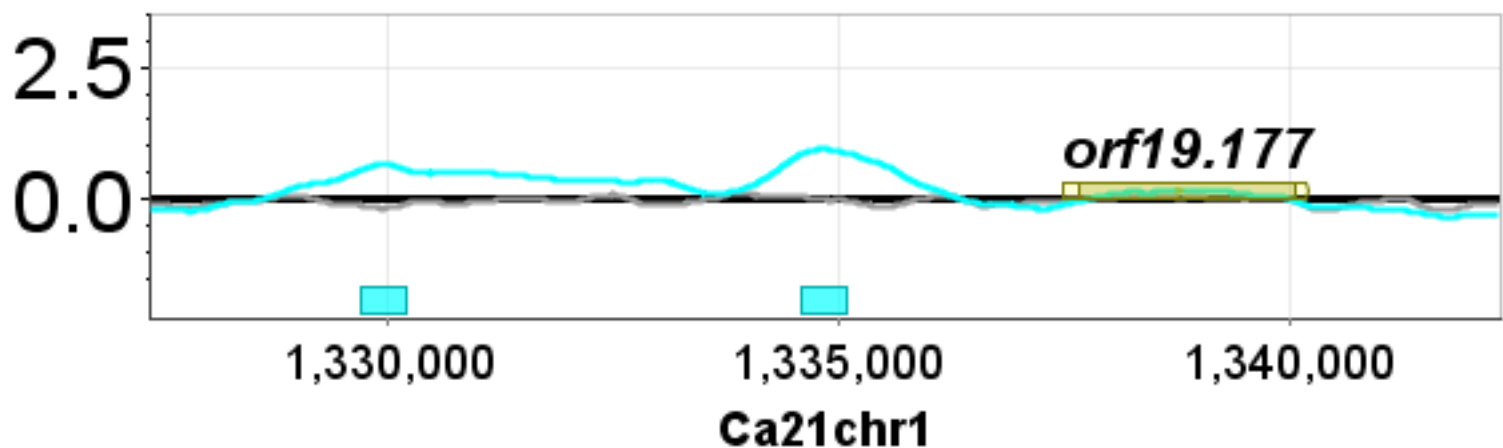

[0.948] Ca21chr1:1667174-1682173 [+] [VRG4, ntar\_155, orf19.1229, ADE4, ntar\_156]

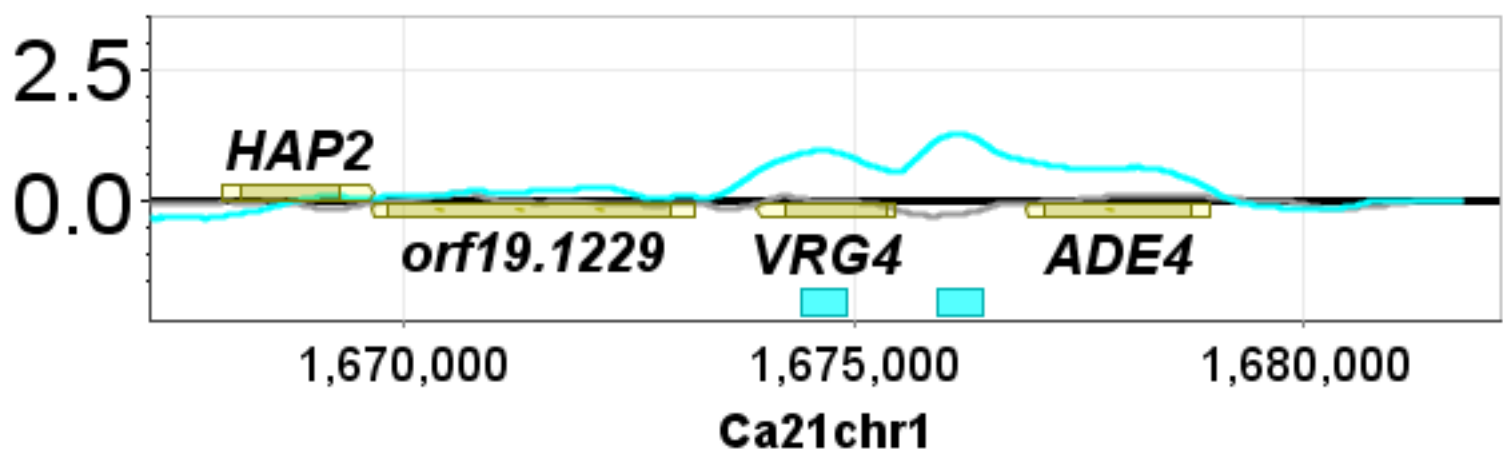

[0.942] Ca21chr5:939007-954006 [+] [SAH1, orf19.3910, orf19.3908, GLN3, orf19.3907]

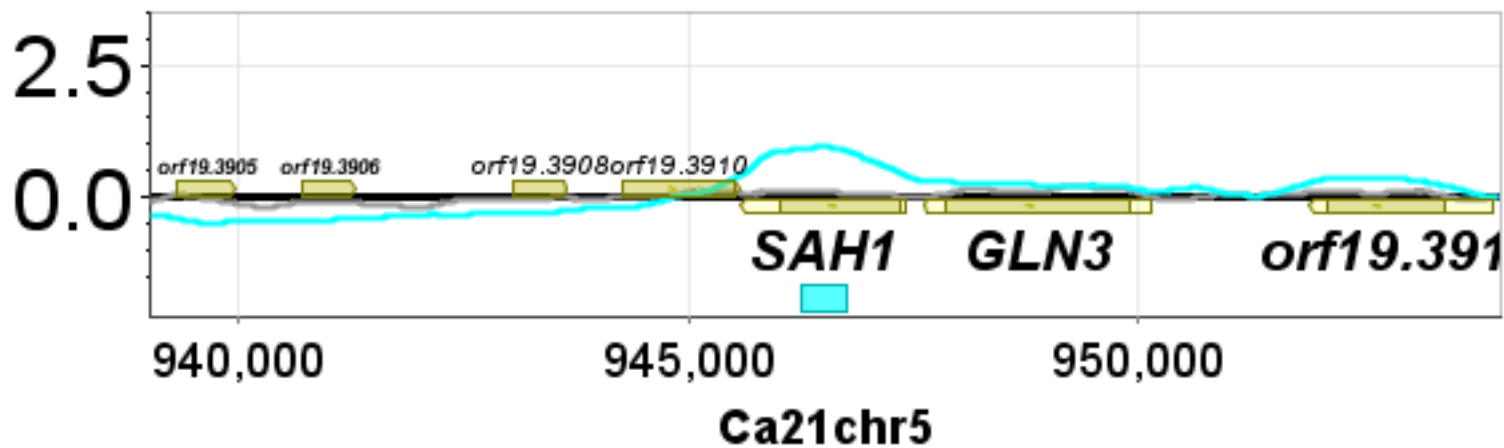

[0.937] Ca21chr1:2933659-2948658 [+] [orf19.4972, HYR1, orf19.4970]

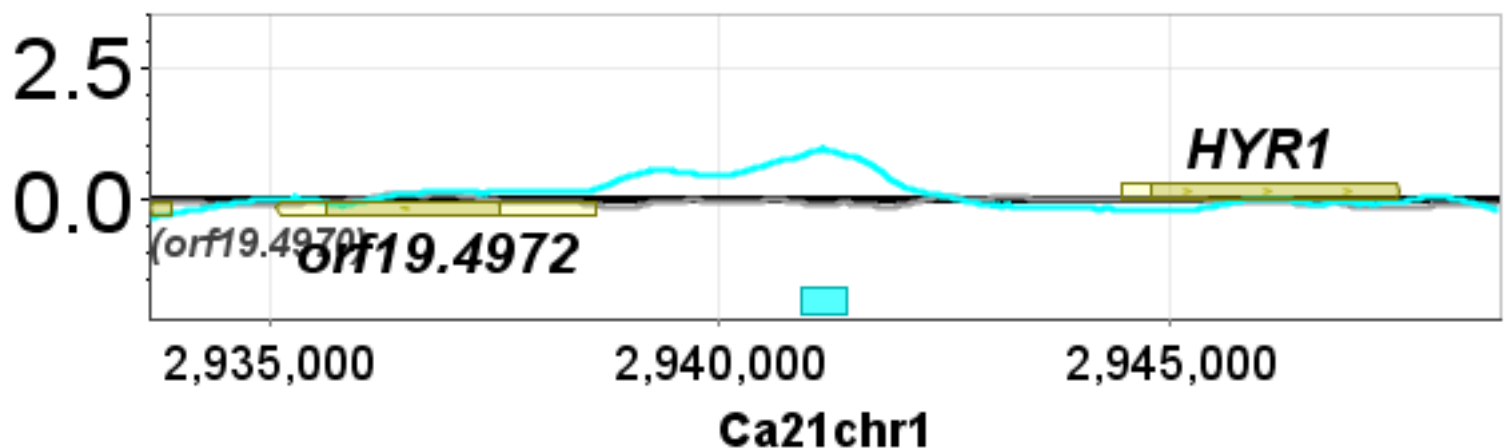

[0.937] Ca21chrR:772463-787462 [+] [orf19.4394, CIT1, orf19.4395, orf19.4396, ntar\_1246]

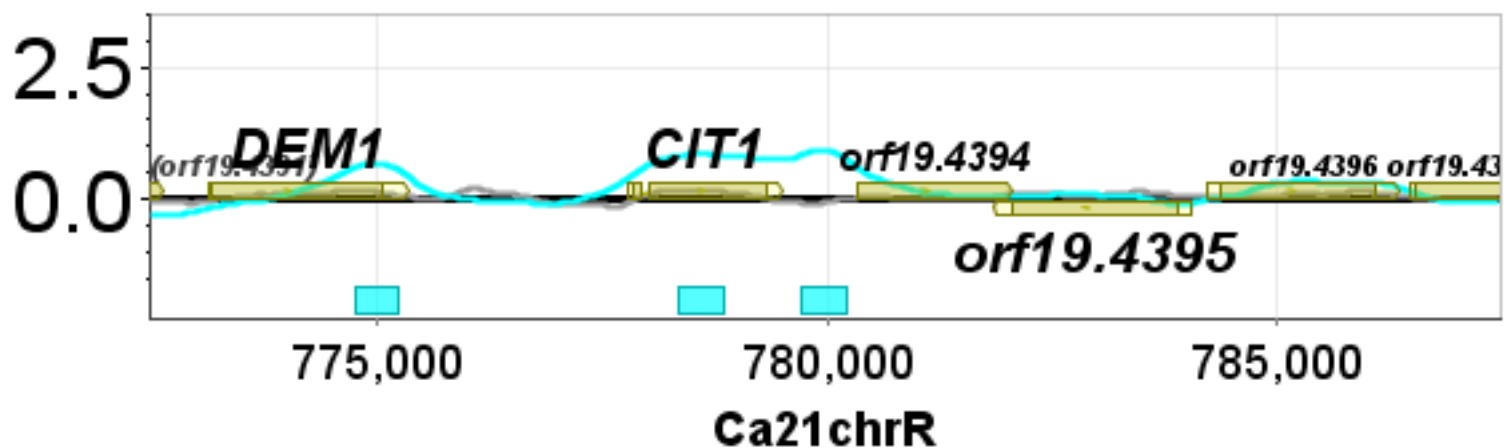

[0.933] Ca21chr4:856525-871524 [+] [JEN2, orf19.5308, orf19.5306, RHD3, orf19.5304]

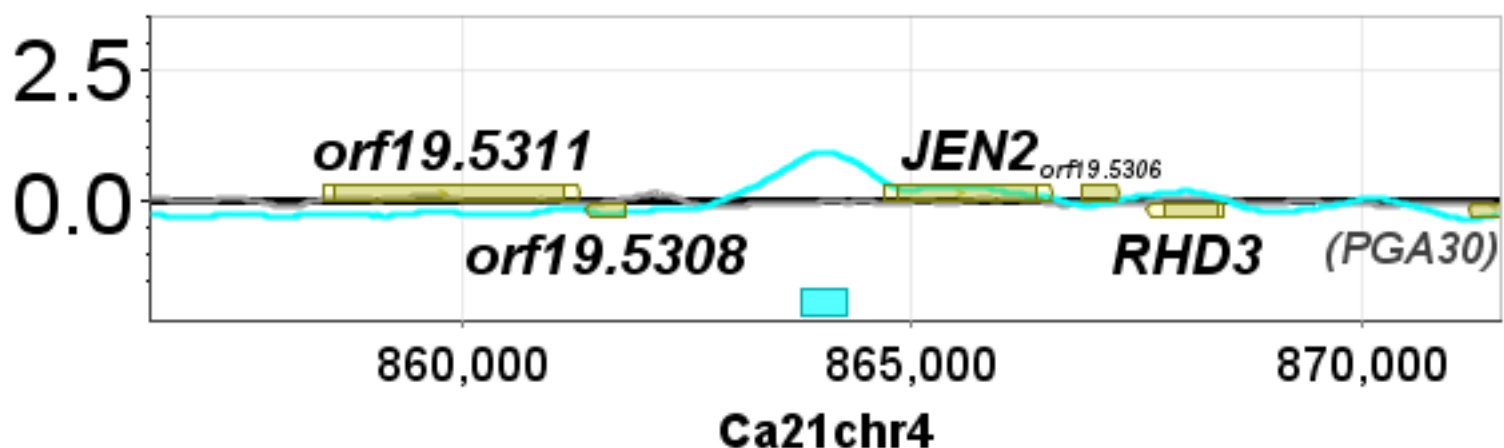

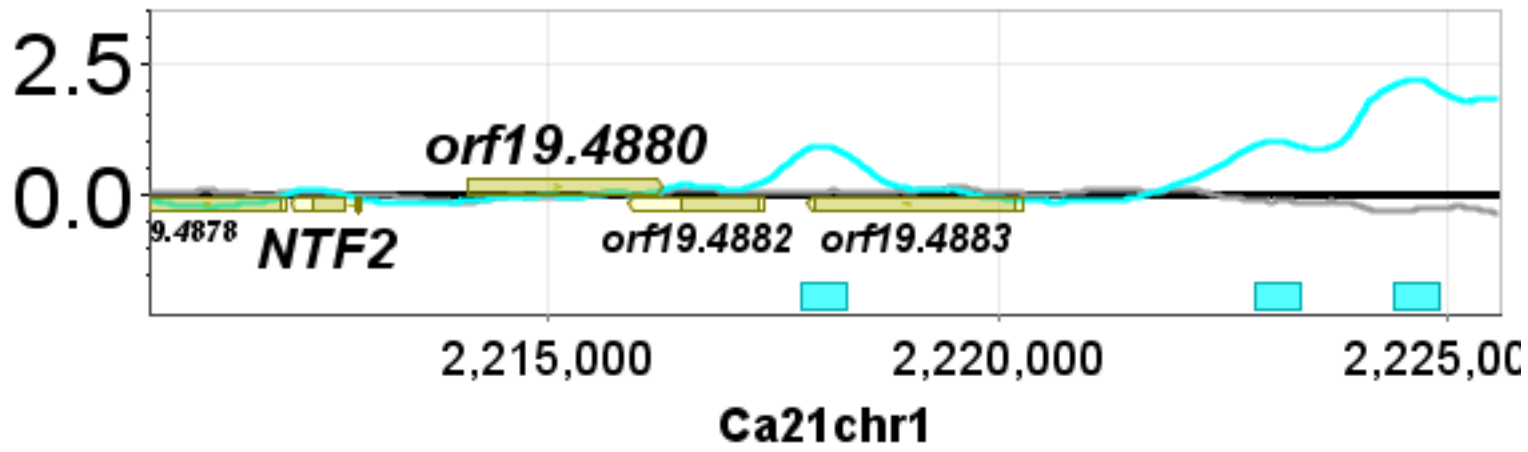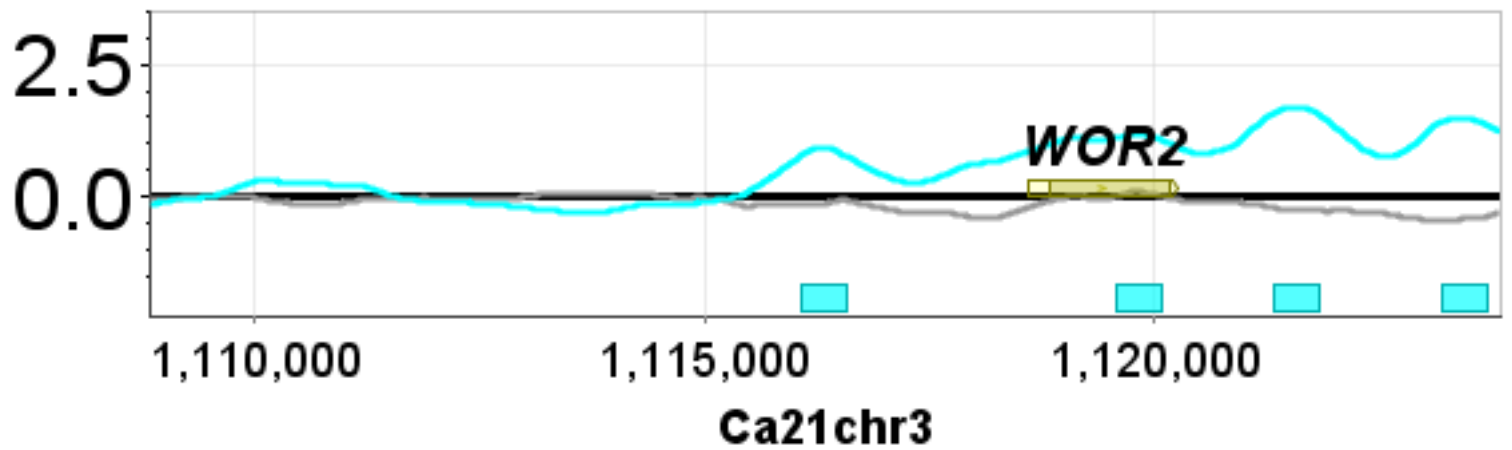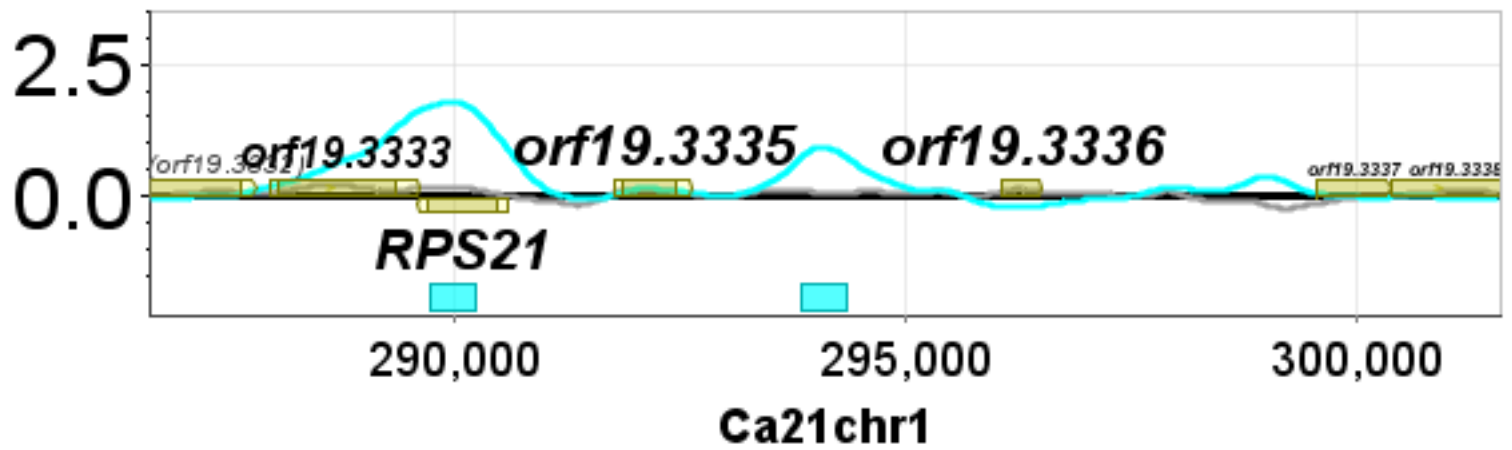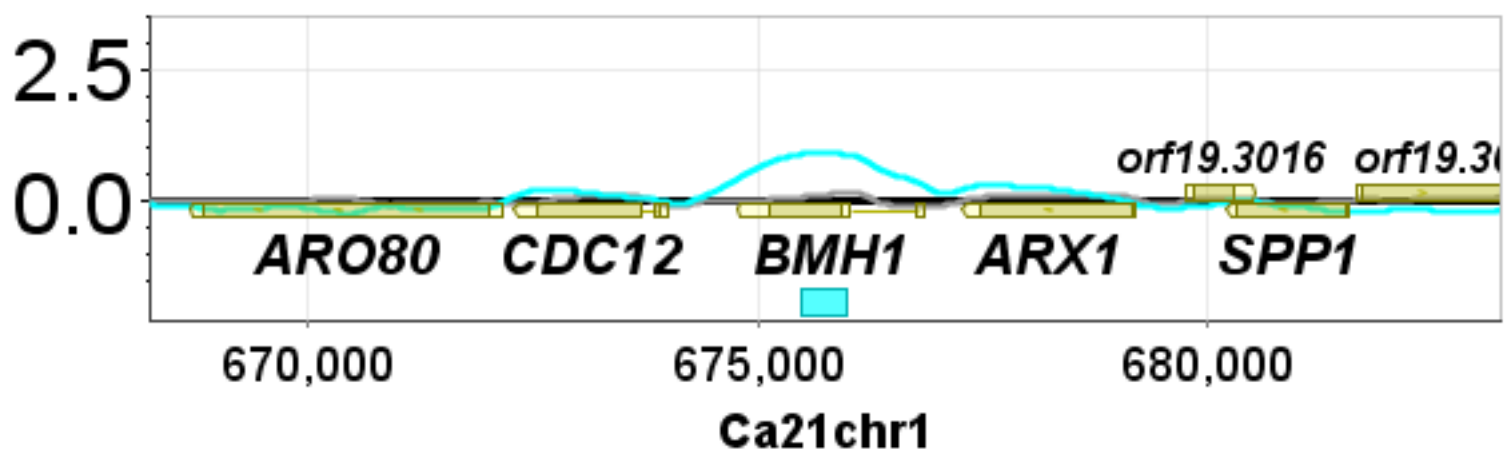



[0.901] Ca21chr2:1796281-1811280 [+] [PIR1, BUD20, orf19.217, orf19.223, orf19.225]

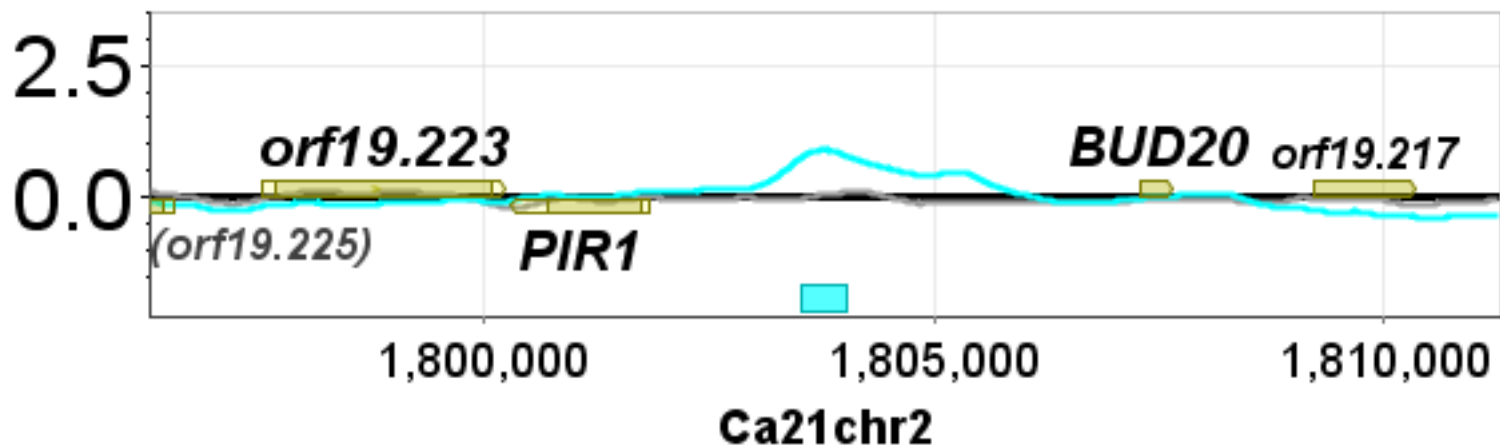

[0.893] Ca21chr2:1112036-1127035 [+] [CDC19, COQ5, ntar\_394, orf19.3574, orf19.3578]

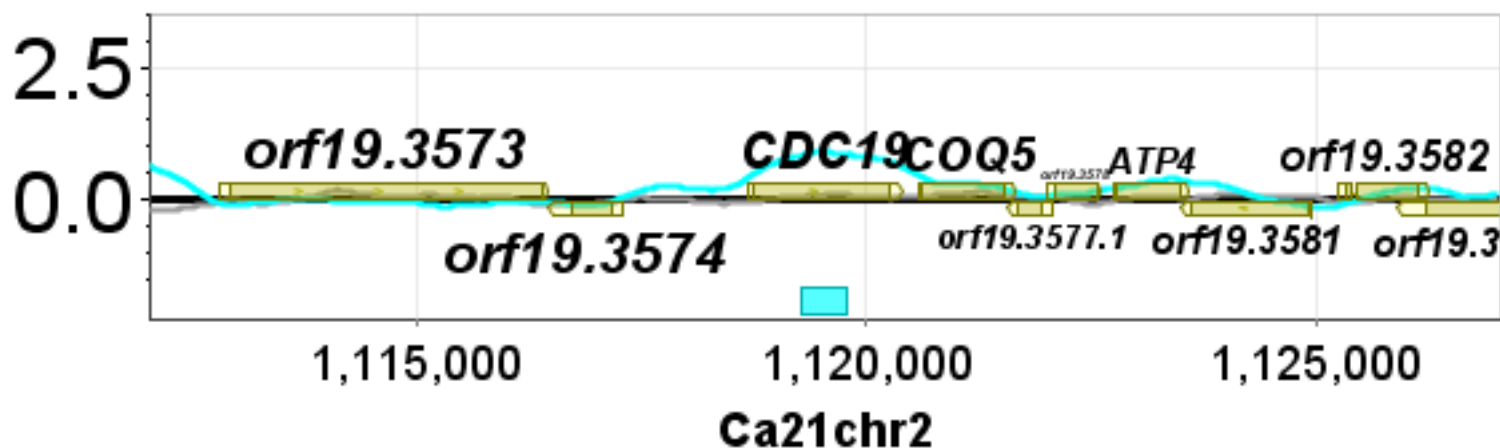

[0.88] Ca21chr1:443884-458883 [+] [orf19.3671, GAL1, GAL10, orf19.3673, ntar\_43]

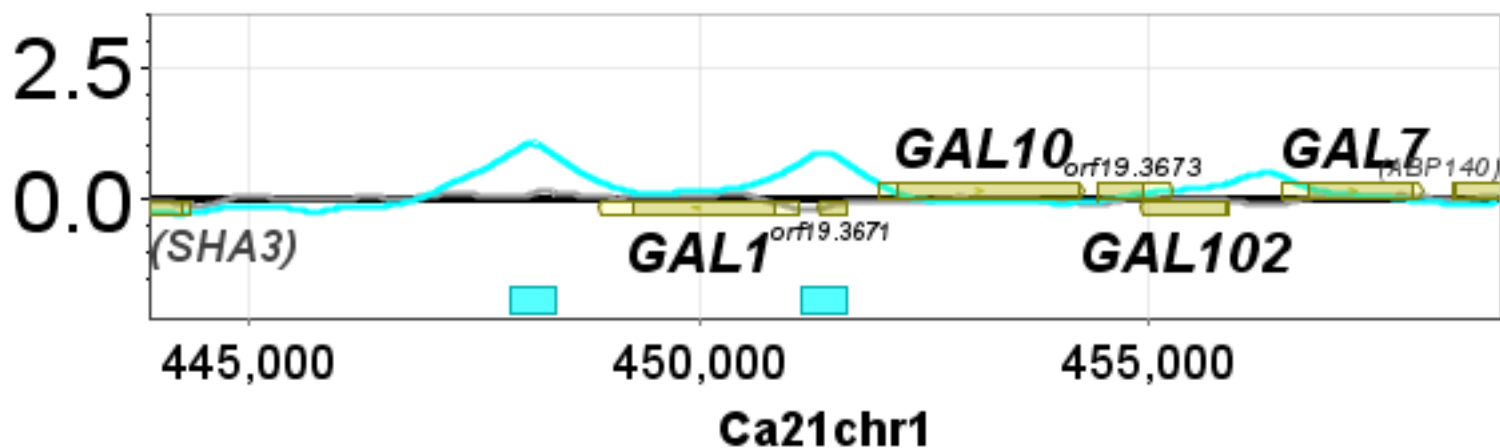

[0.88] Ca21chr3:1029952-1044951 [+] [ntar\_606, FAS2, orf19.5952, tk(cuu)2, orf19.5953]

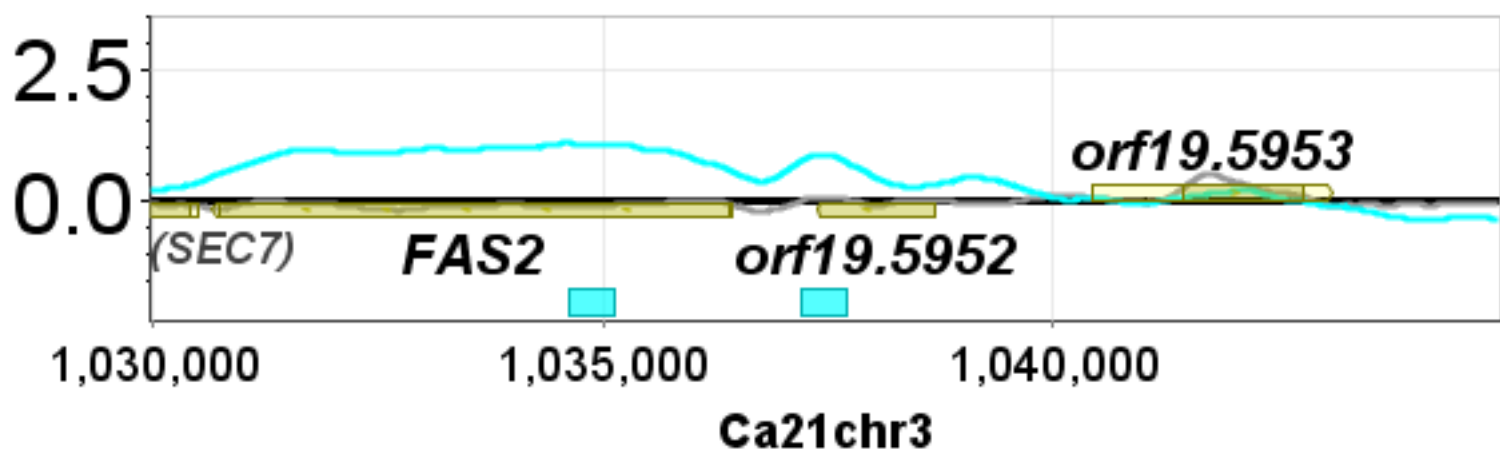

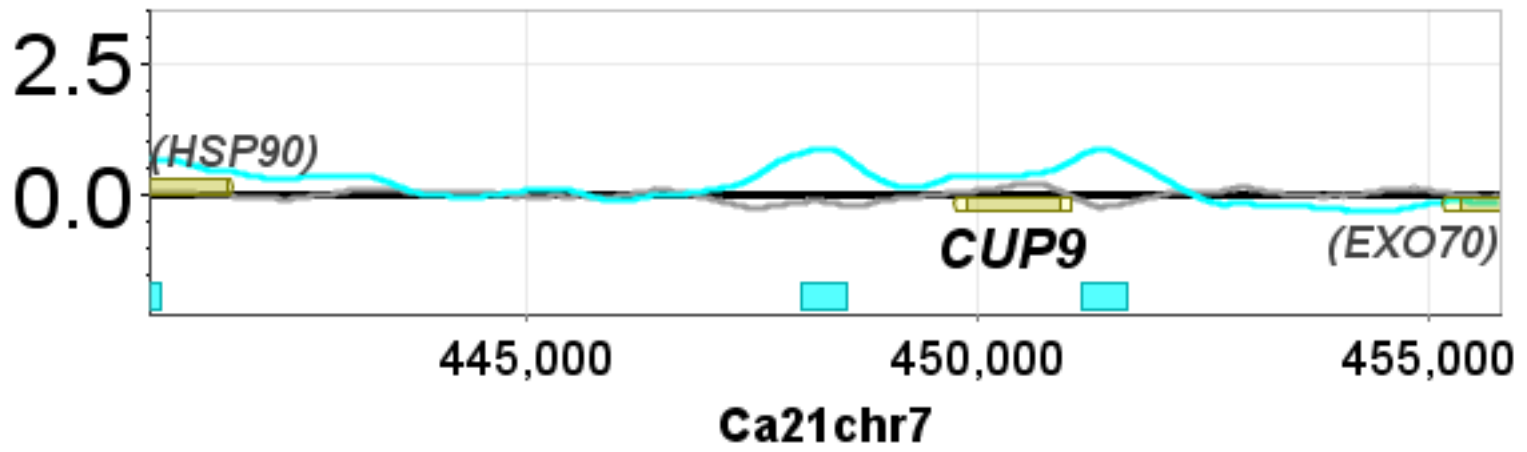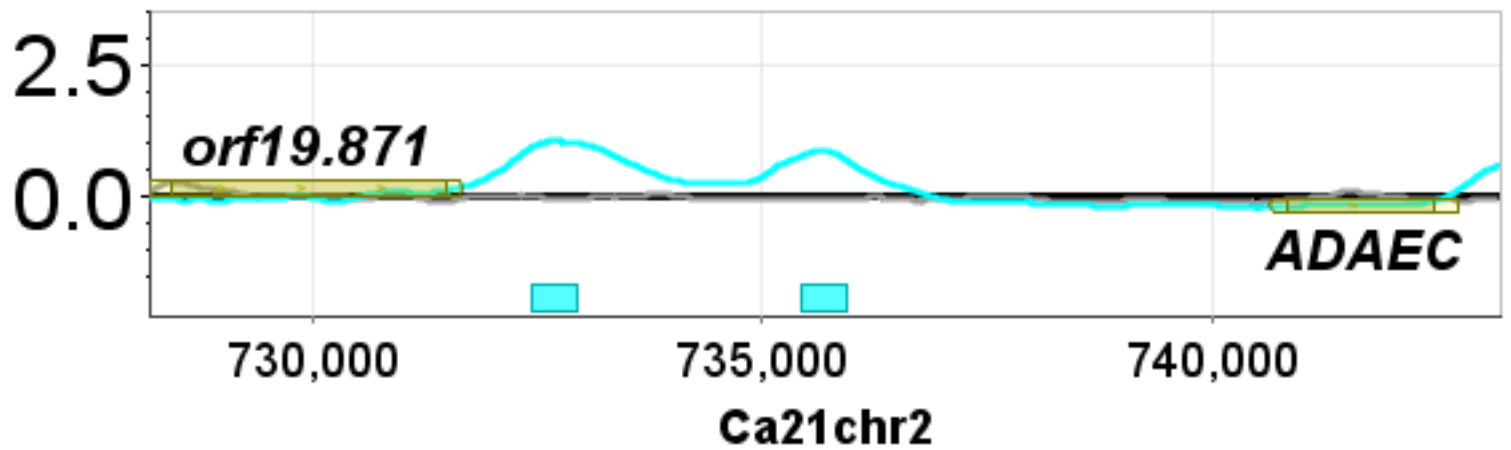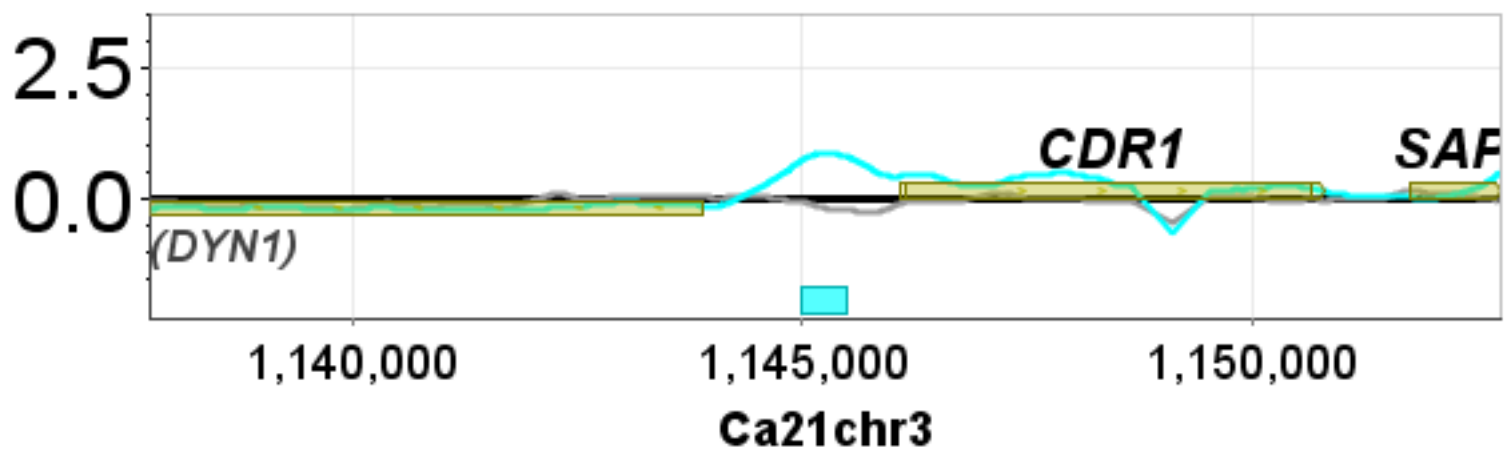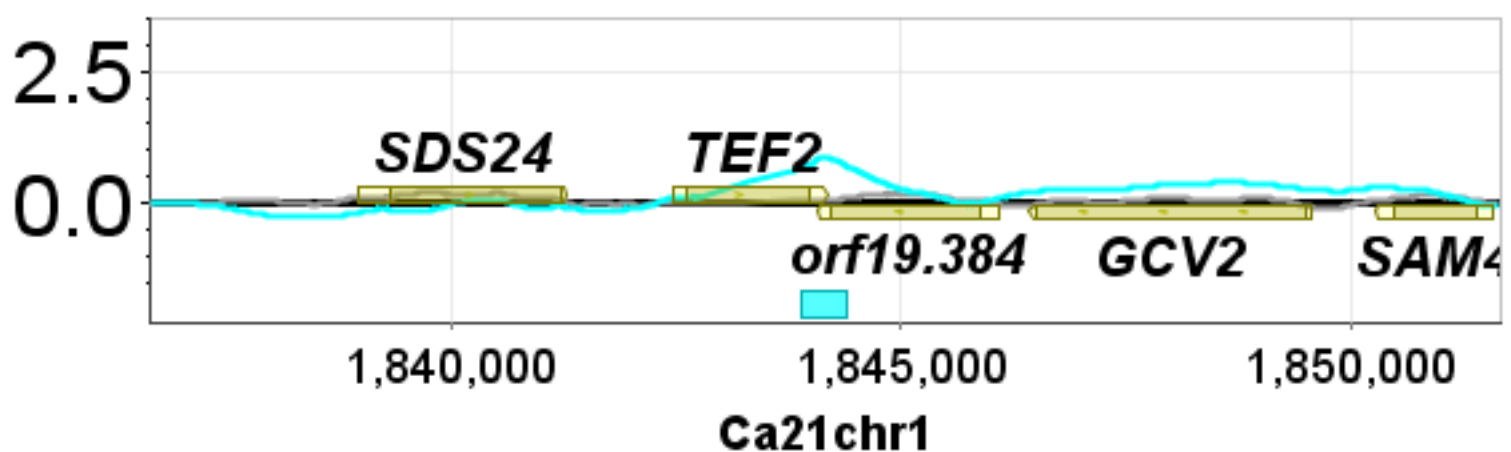

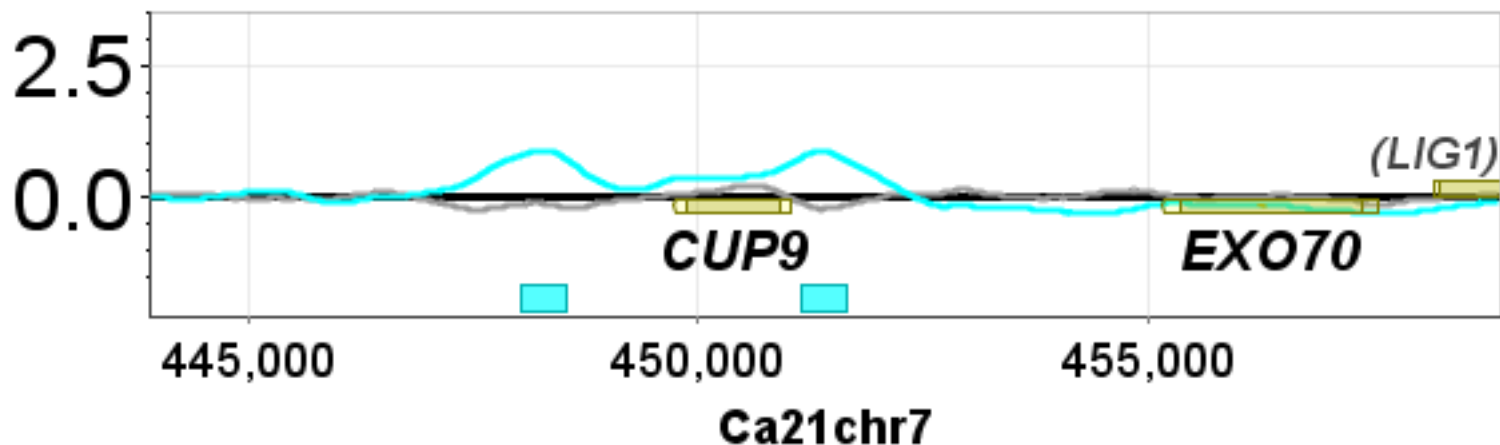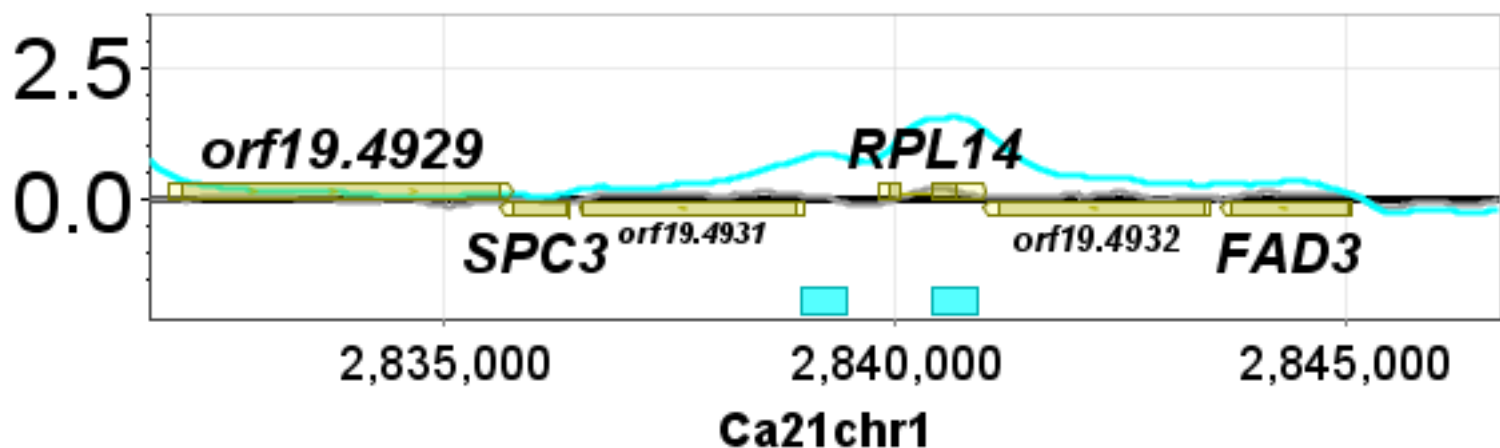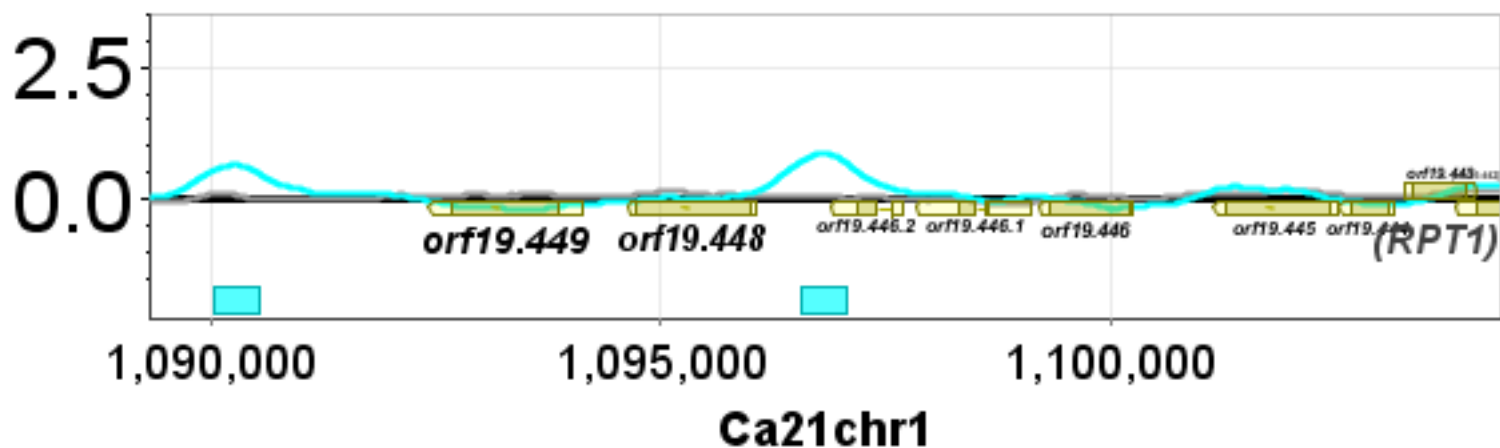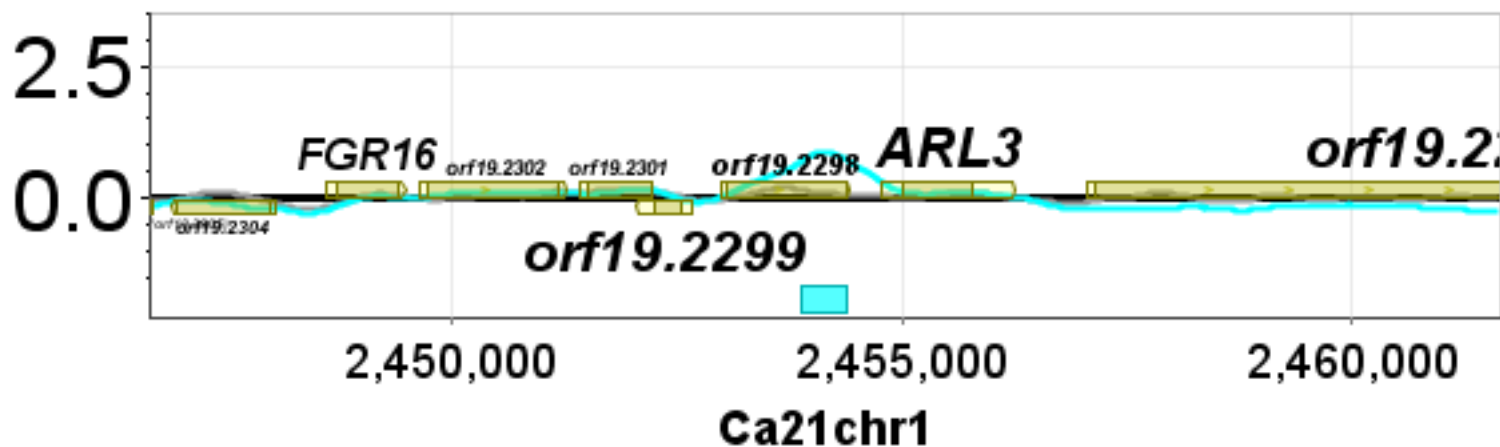

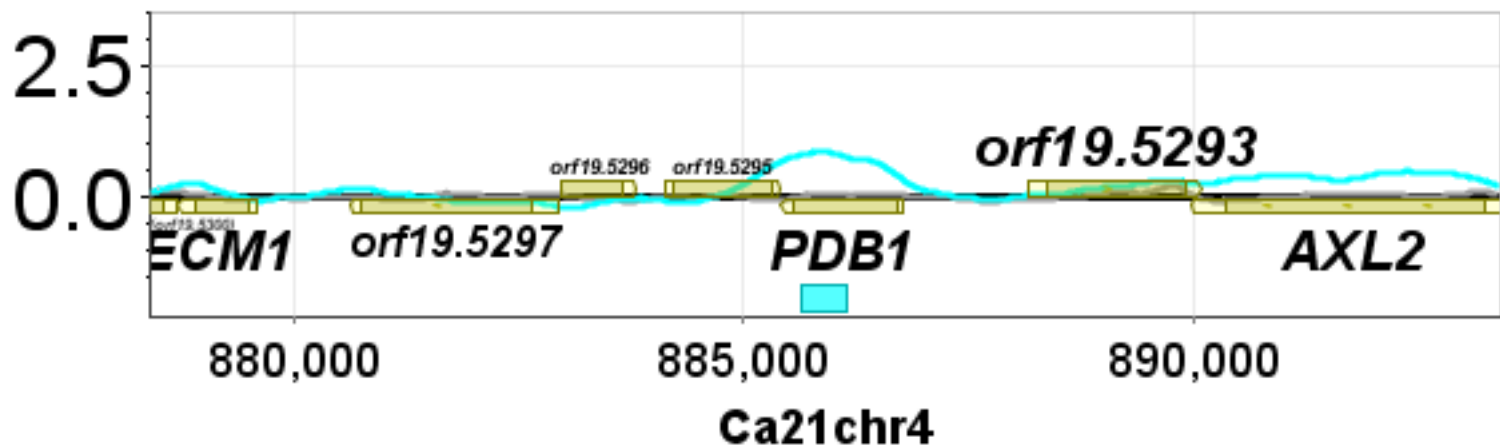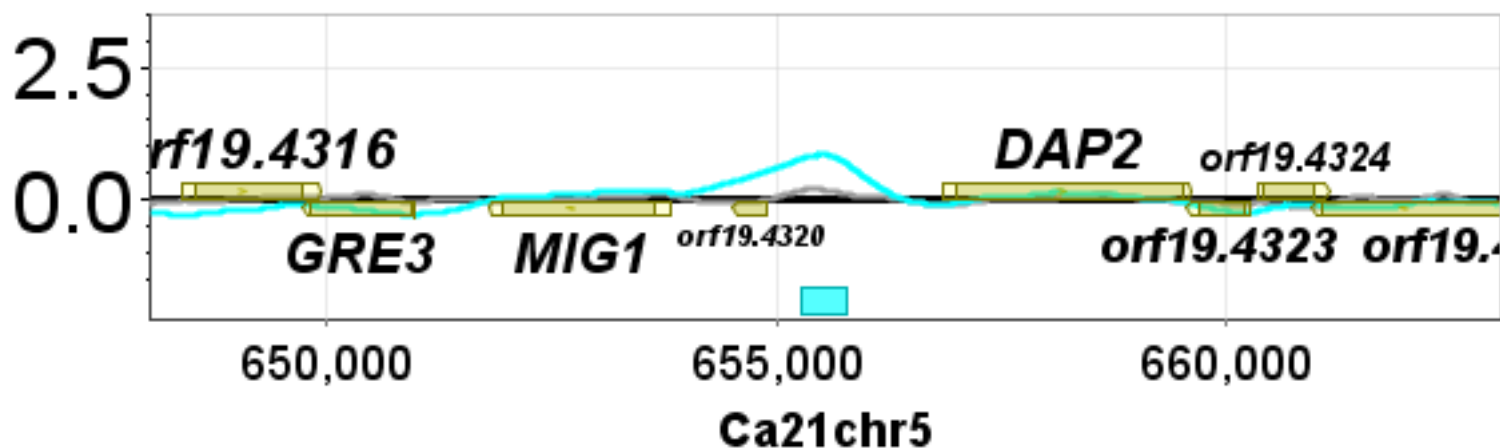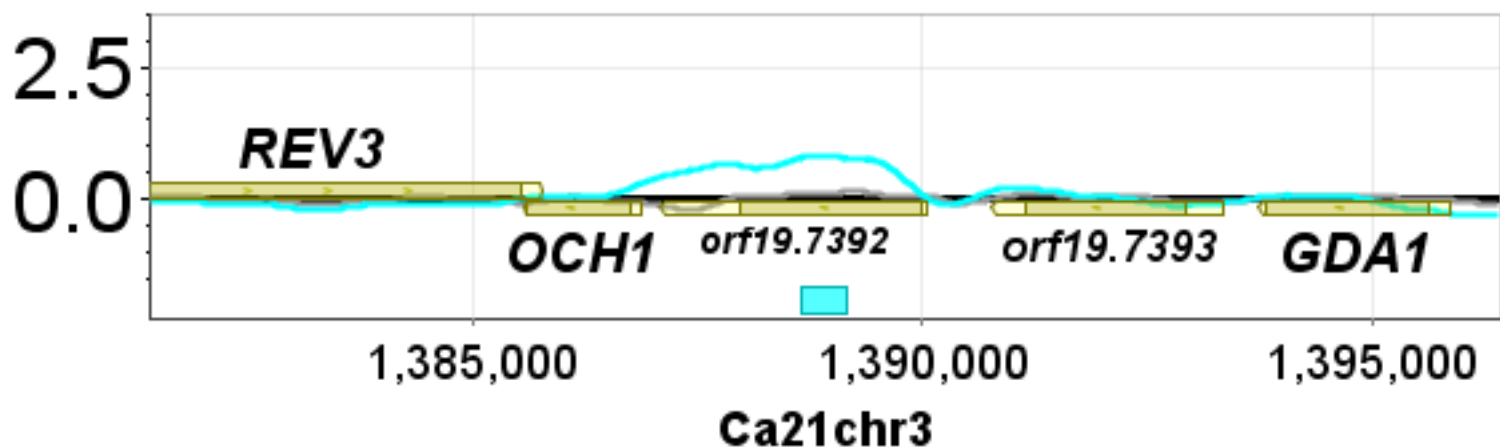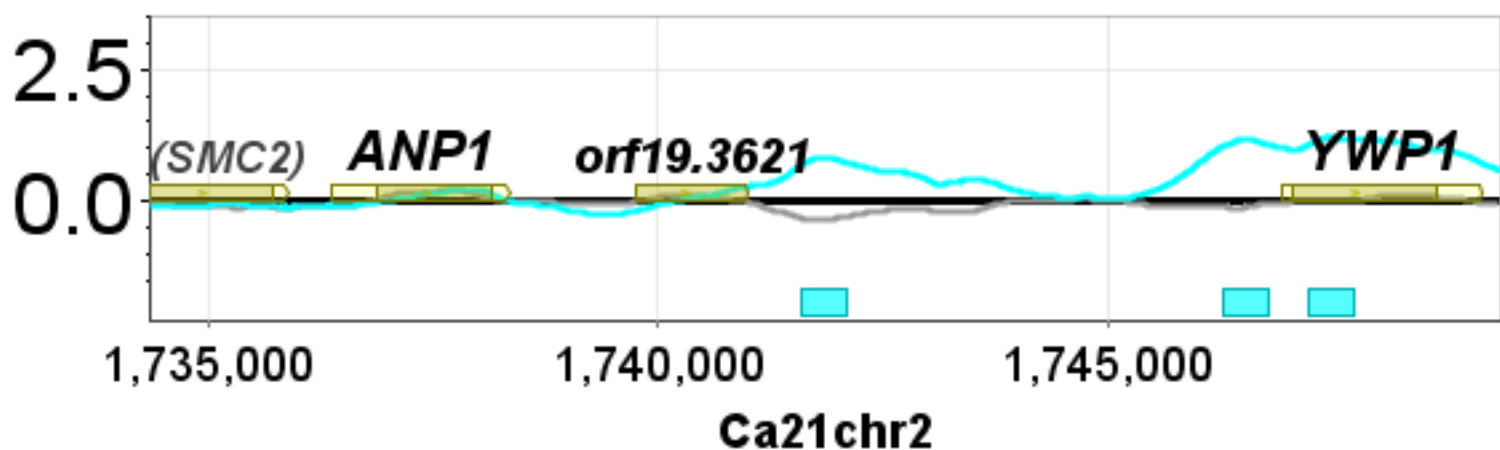

[0.829] Ca21chrR:112852-127851 [+] [ntar\_1162, snrnau5, orf19.7485, ADE1, MRPL6]

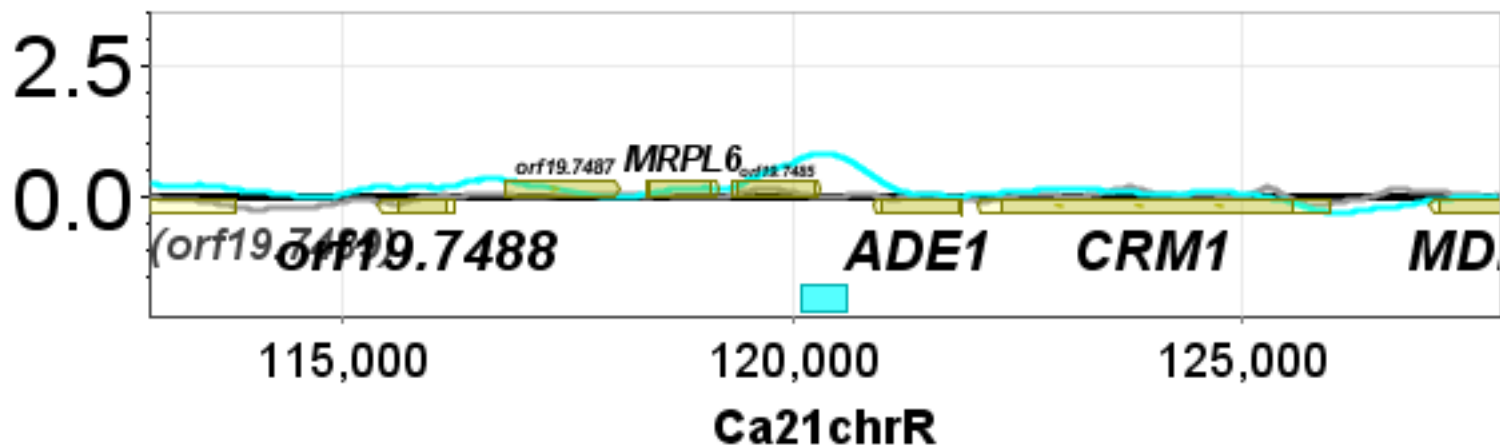

[0.81] Ca21chrR:1144465-1159464 [+] [ntar\_1286, ntar\_1285, orf19.5287, ntar\_1287, IFE2]

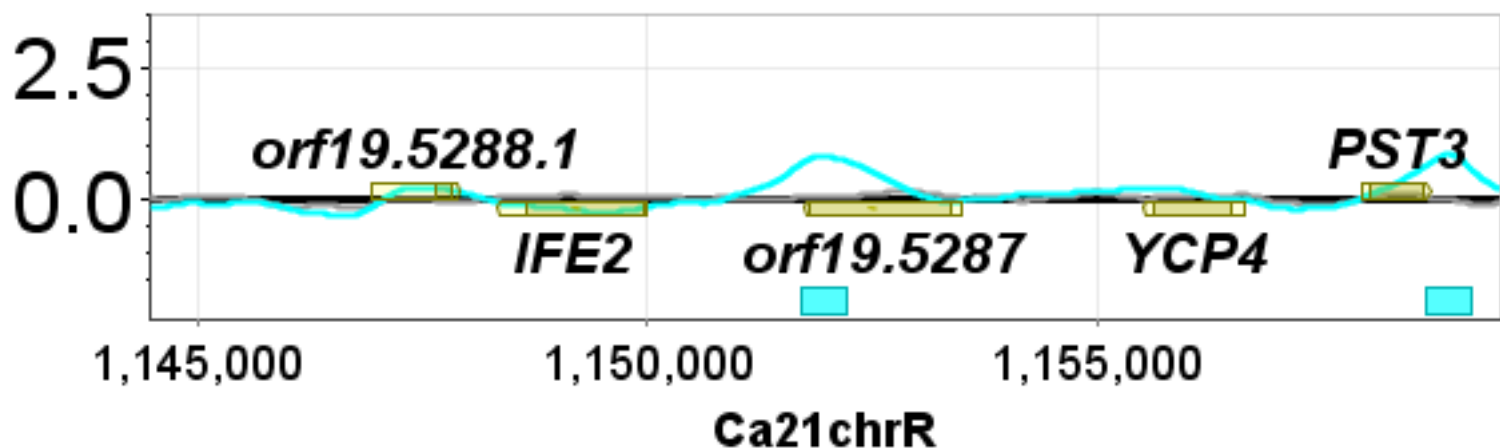

[0.806] Ca21chrR:257952-272951 [+] [ntar\_1177, ntar\_1176, ntar\_1178, ntar\_1175.5, ntar\_1179.1]

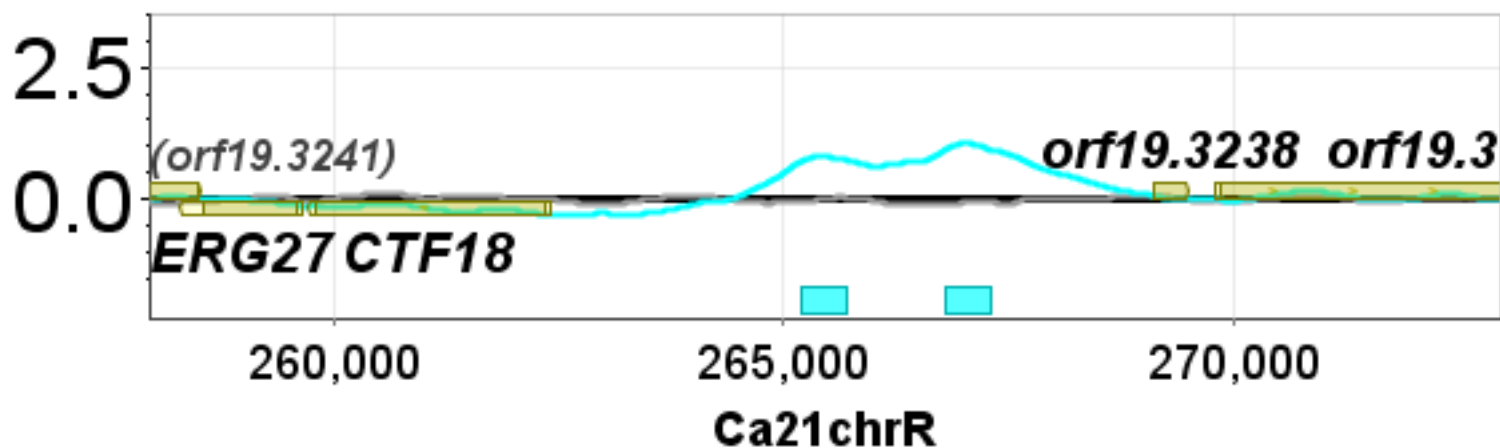

[0.805] Ca21chr1:1158710-1173709 [+] [ntar\_1426, orf19.410.3, ntar\_117, orf19.411, tn(guu)2]

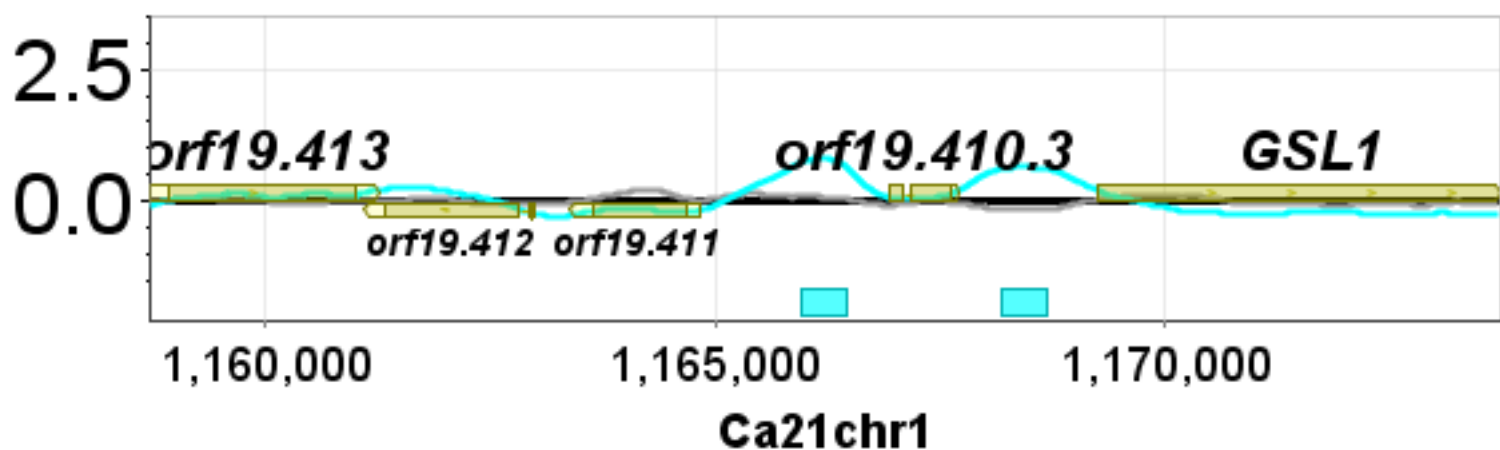

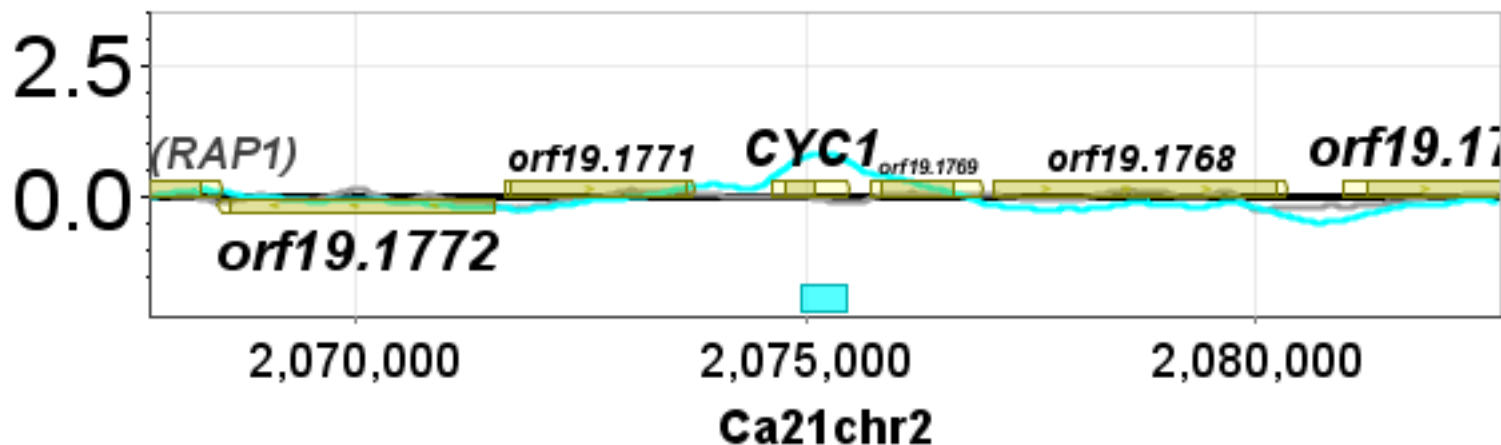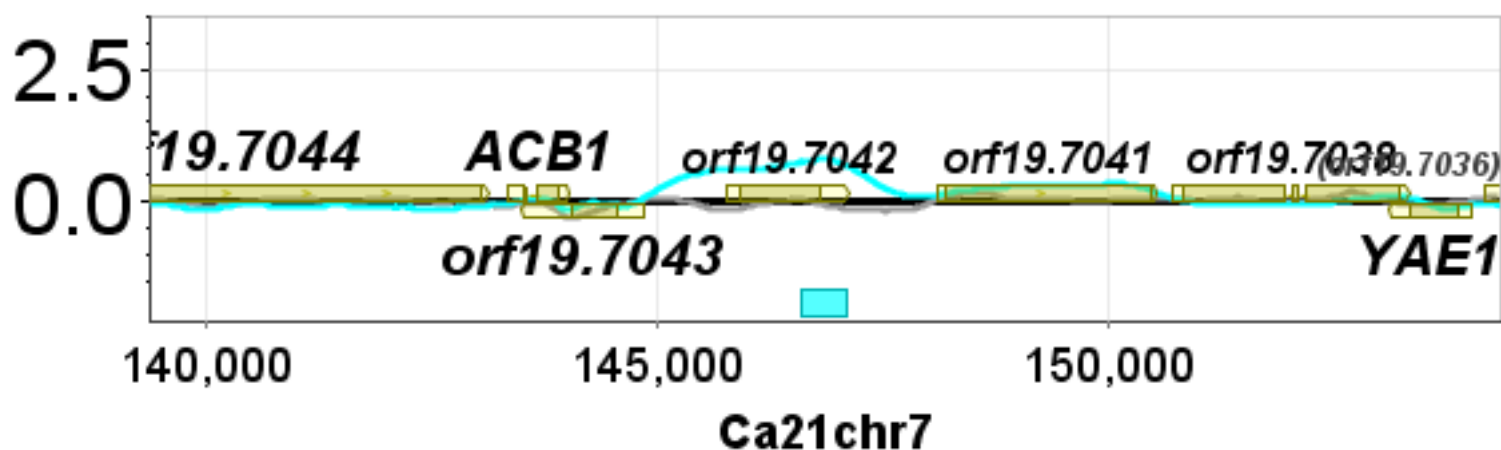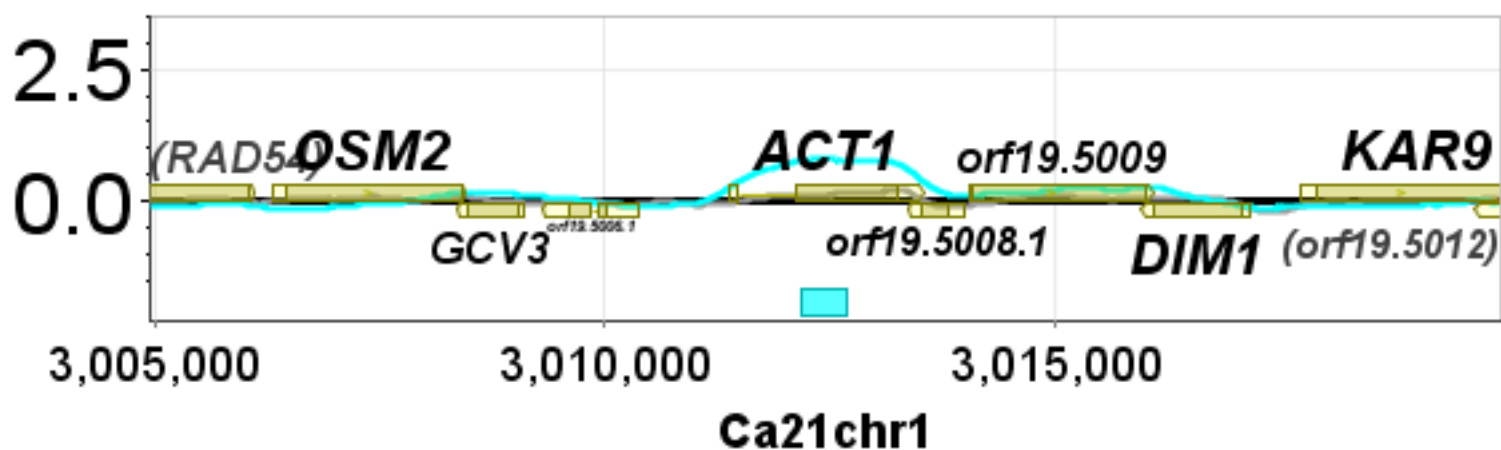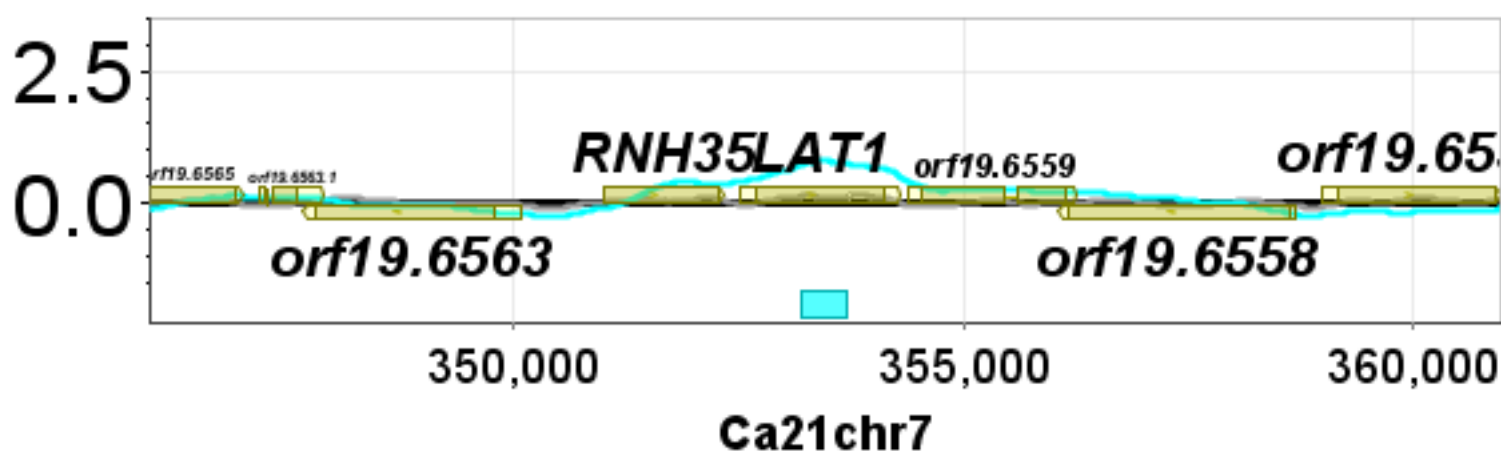

[0.791] Ca21chr5:1171970-1186969 [+] [DES1, HTS1, ntar\_1414, orf19.4046, EST1]

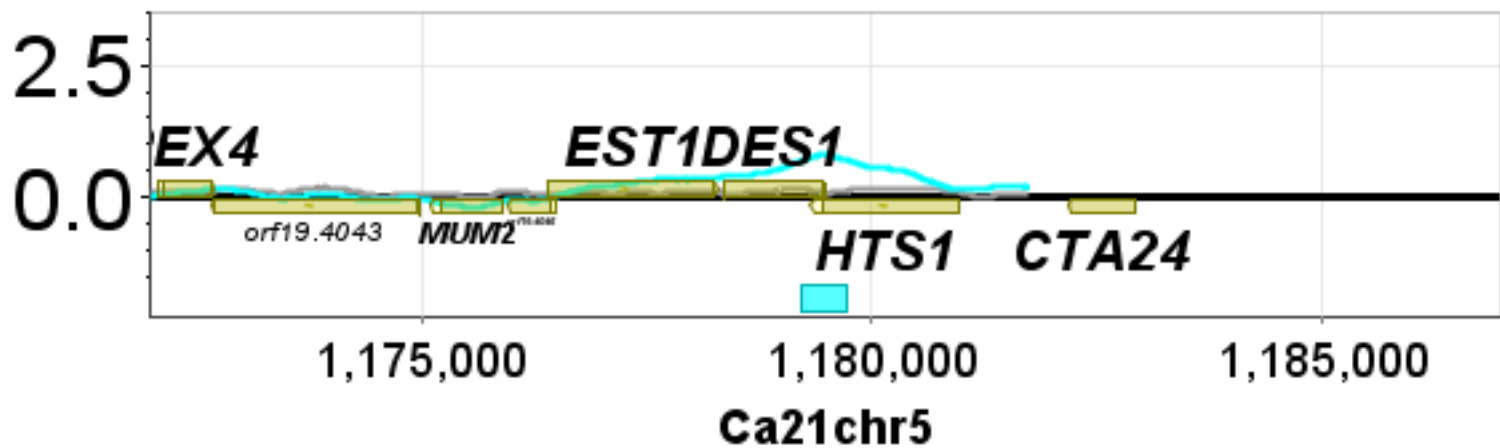

[0.789] Ca21chr1:140057-155056 [+] [ntar\_16, orf19.6027, HGC1, ERG2]

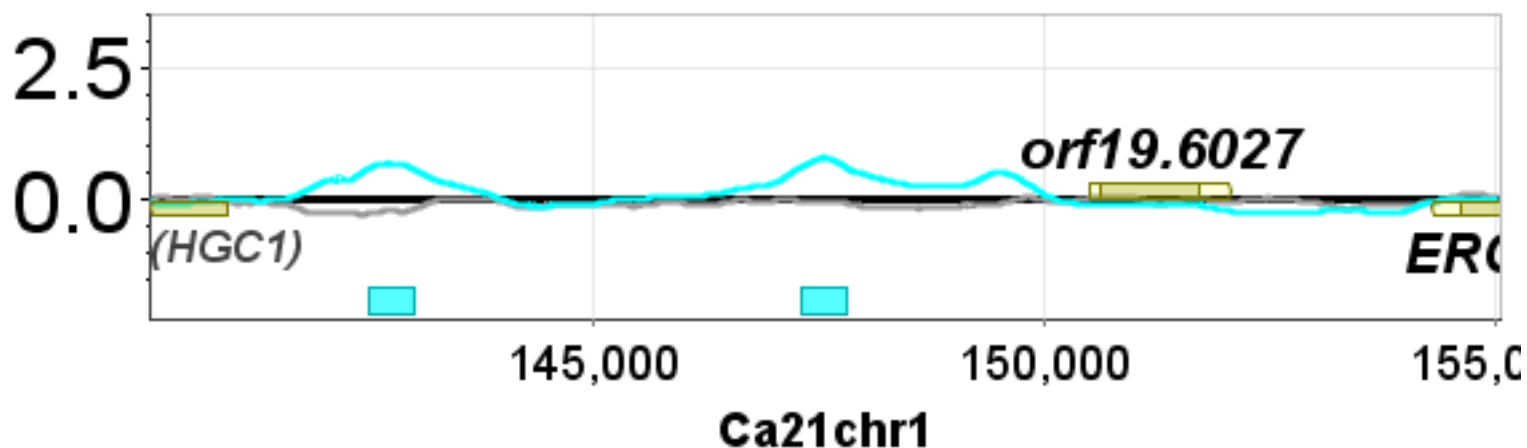

[0.784] Ca21chr3:1467644-1482643 [+] [ntar\_658, ntar\_659, AAF1, ECM15, ntar\_660]

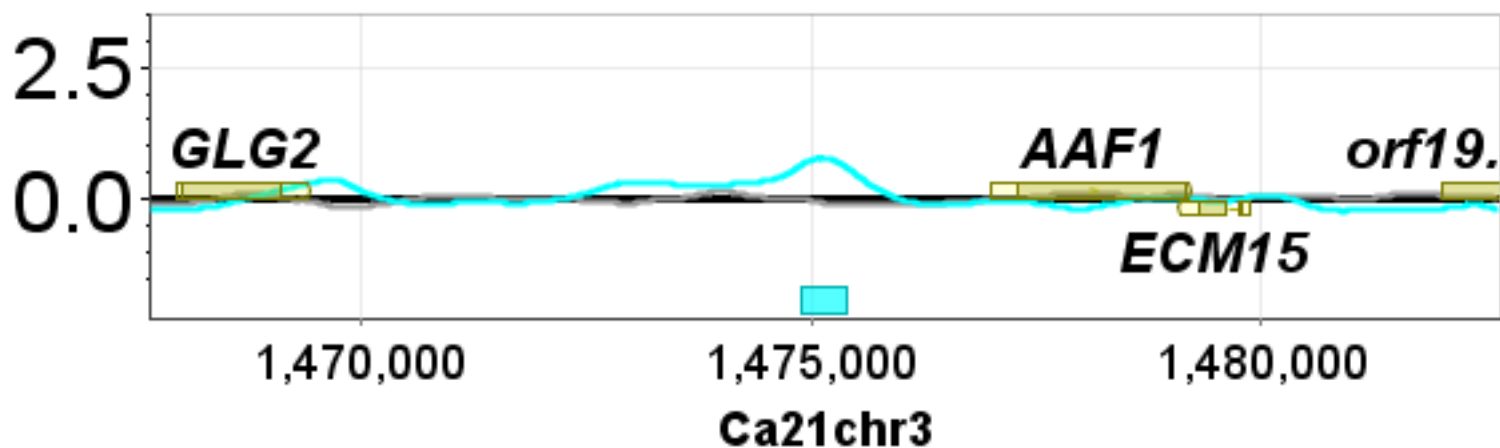

[0.777] Ca21chr1:1563874-1578873 [+] [ntar\_139, ntar\_138, tl(aag)2, ntar\_140, RME1]

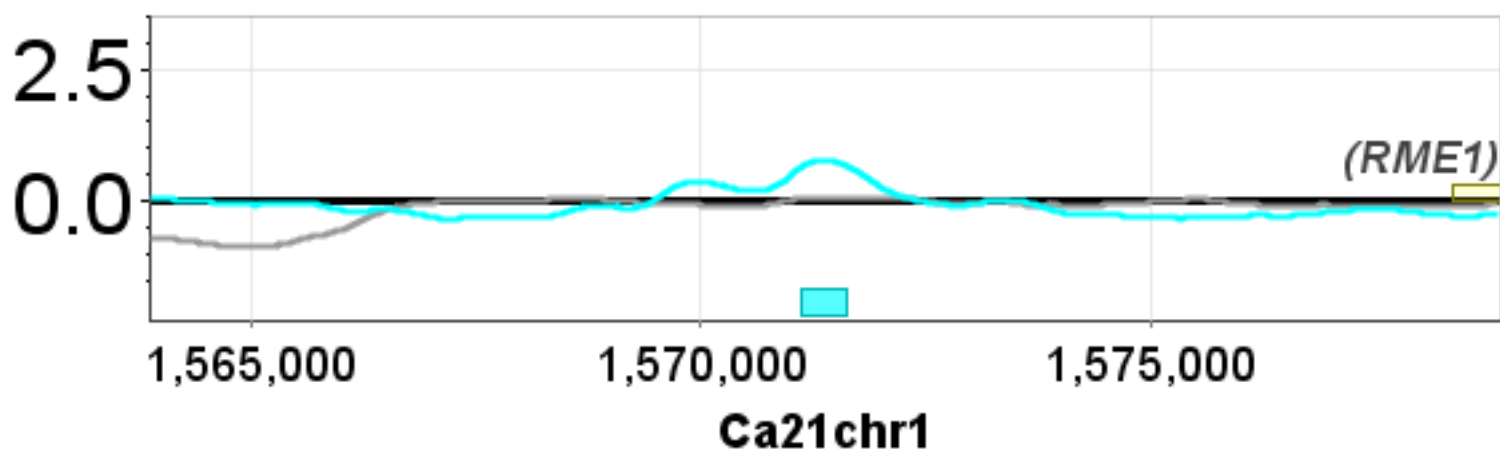

[0.774] Ca21chr1:88594-103593 [+] [APC1, TUF1, orf19.6048, orf19.6049, orf19.6045]

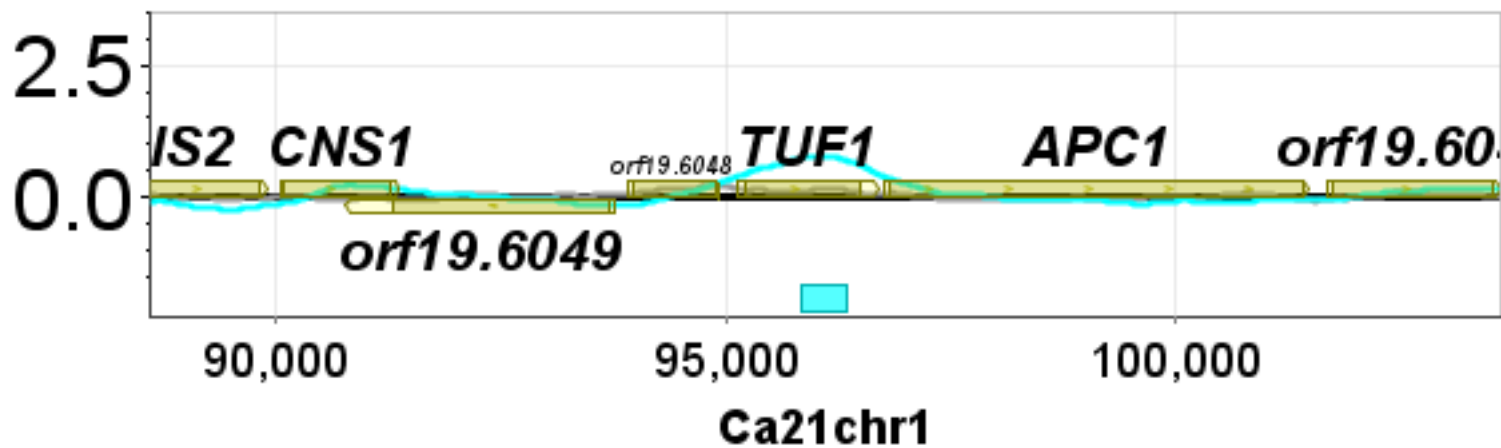

[0.769] Ca21chr1:2513359-2528358 [+] [PHO84, DPP1, ntar\_240, ntar\_241, ntar\_239]

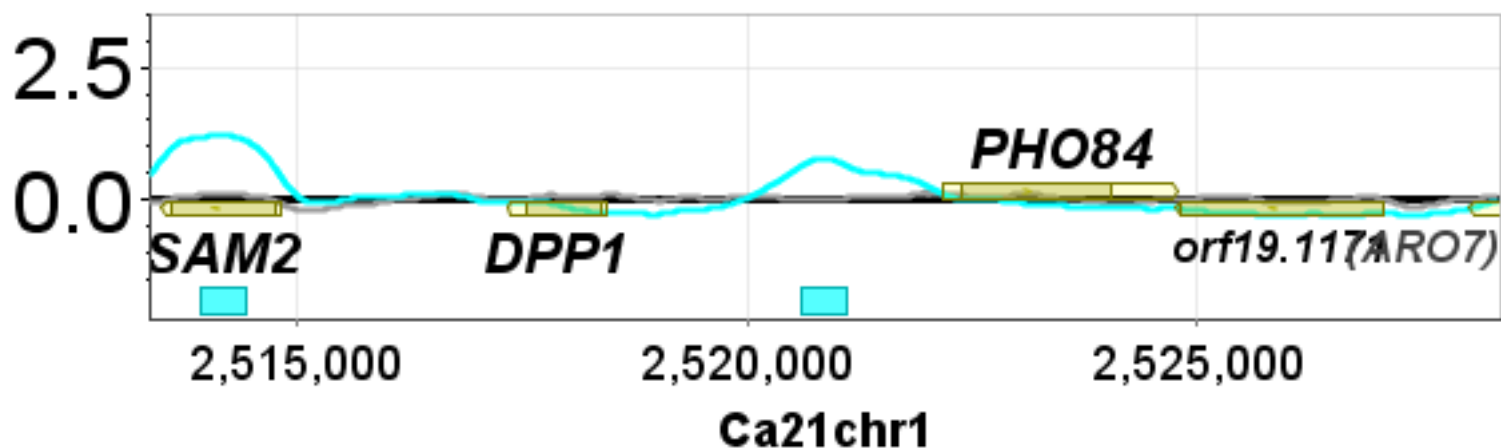

[0.764] Ca21chr2:2182057-2197056 [+] [RPS4A, orf19.5342, orf19.5340, orf19.5339, GAL4]

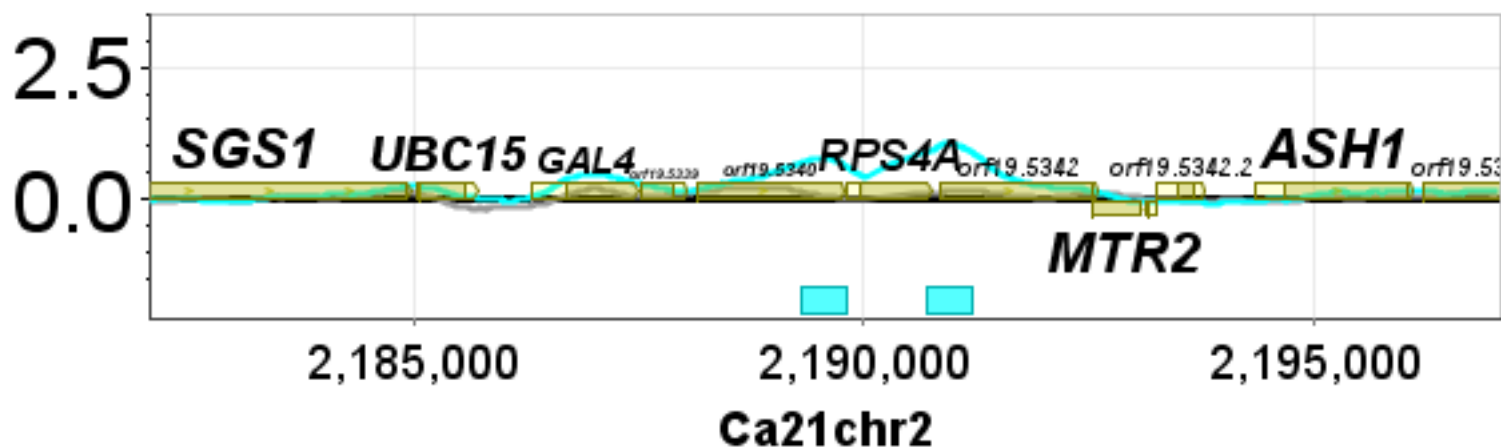

[0.762] Ca21chr2:1138037-1153036 [+] [ts(aga)4, orf19.6873.1, RPS8A, orf19.6874, ntar\_395]

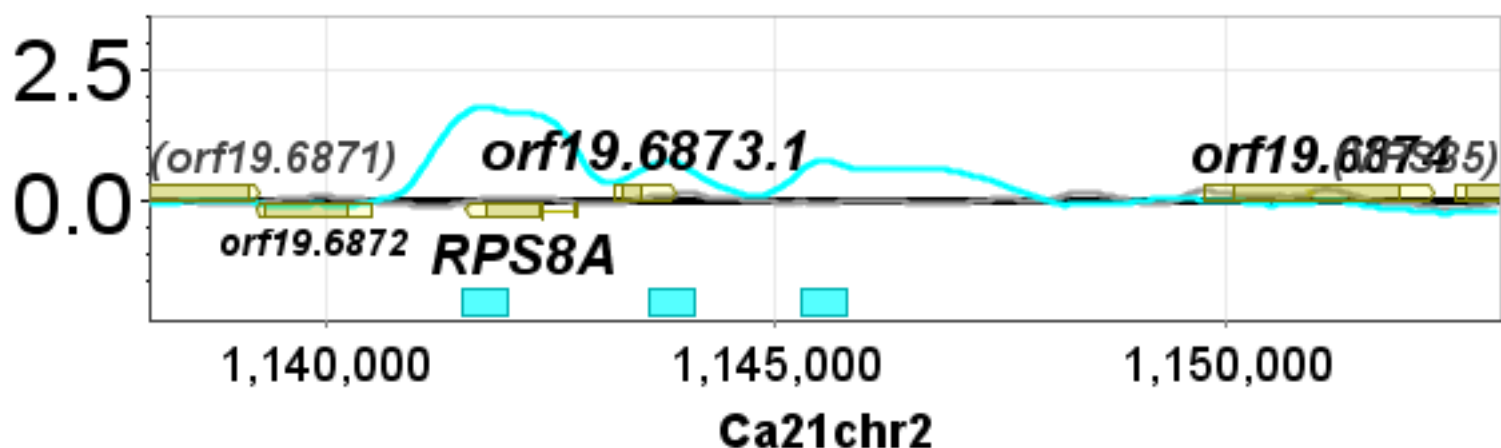



[0.756] Ca21chr7:357360-372359 [+] [orf19.6556, ntar\_1094, ntar\_1093, orf19.6555, orf19.6554]

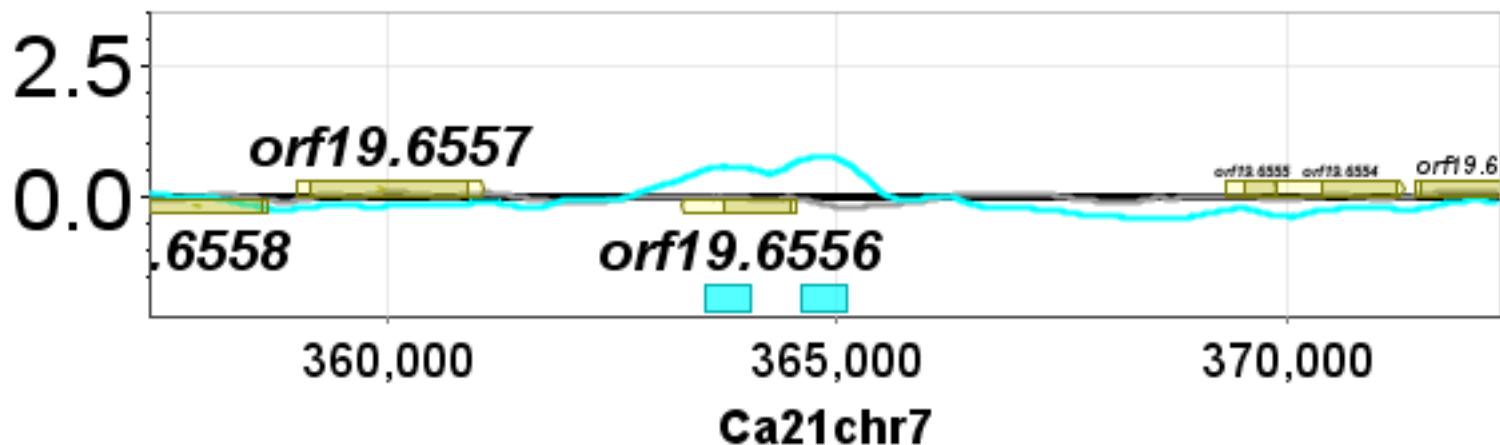

[0.752] Ca21chr2:2046538-2061537 [+] [MP65, orf19.1780, orf19.1778, orf19.1782, orf19.1777]

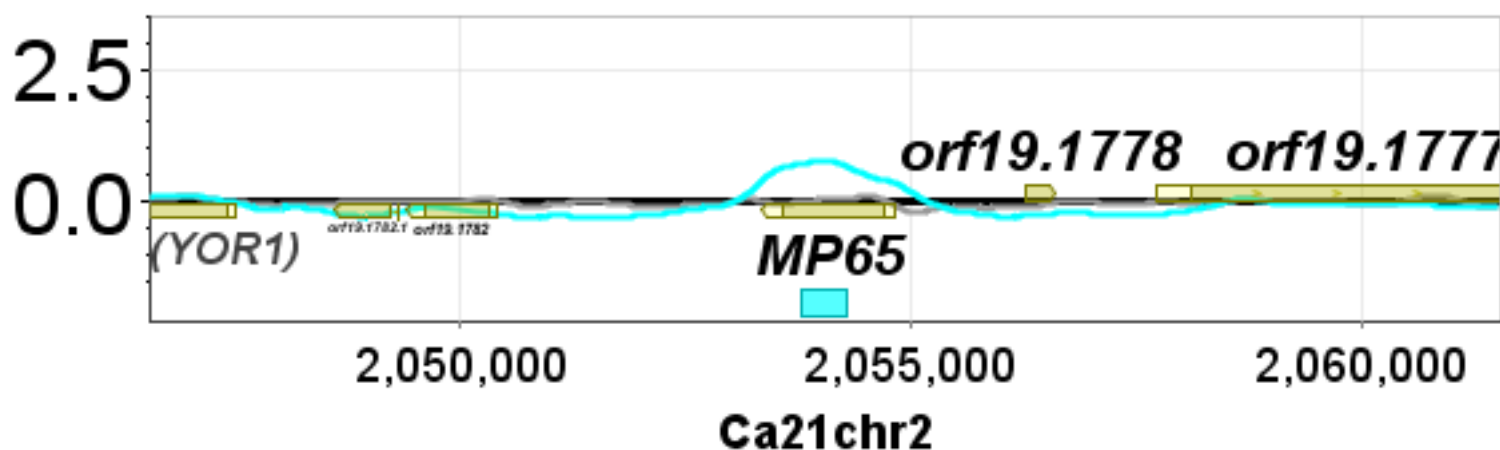

[0.752] Ca21chrR:790346-805345 [+] [orf19.4382, VTC3, ntar\_1247, orf19.4383, ntar\_1248]

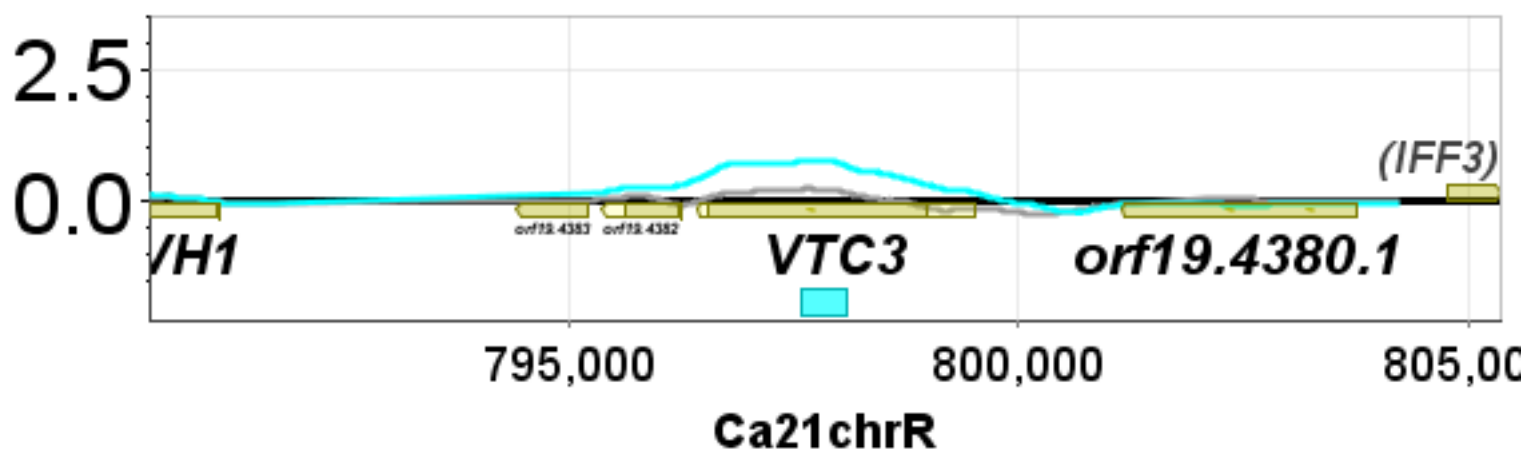

[0.745] Ca21chr7:623023-638022 [+] [ENA21, orf19.5169, PMT1, orf19.5168, LIP9]

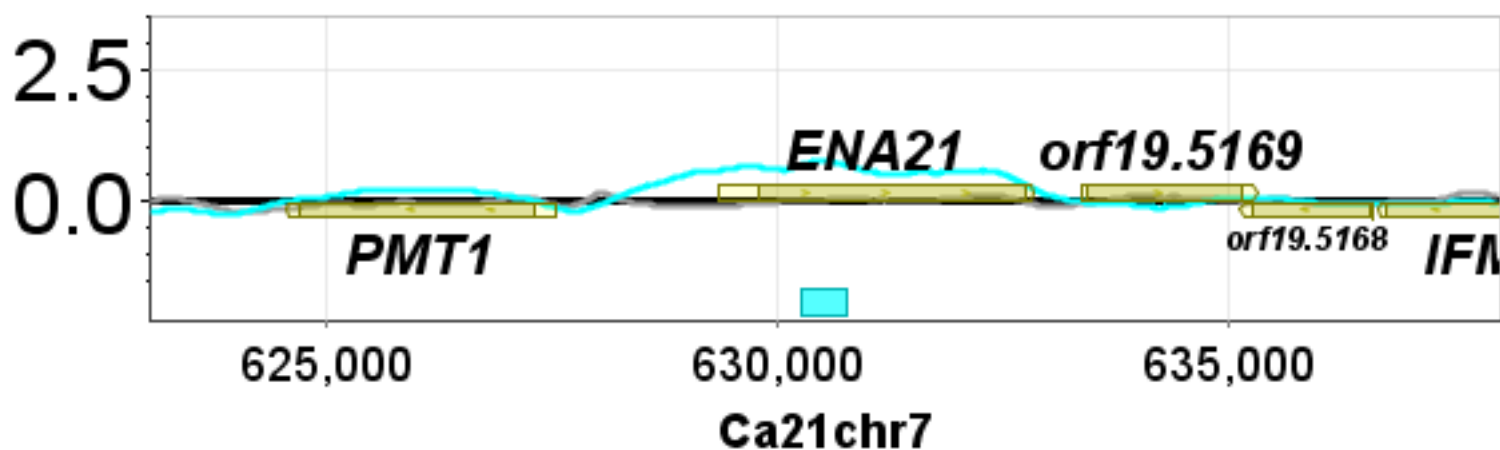

[0.744] Ca21chrR:15394-30393 [+] [MIS12, orf19.7531, EPL1, orf19.7527, BNR1]

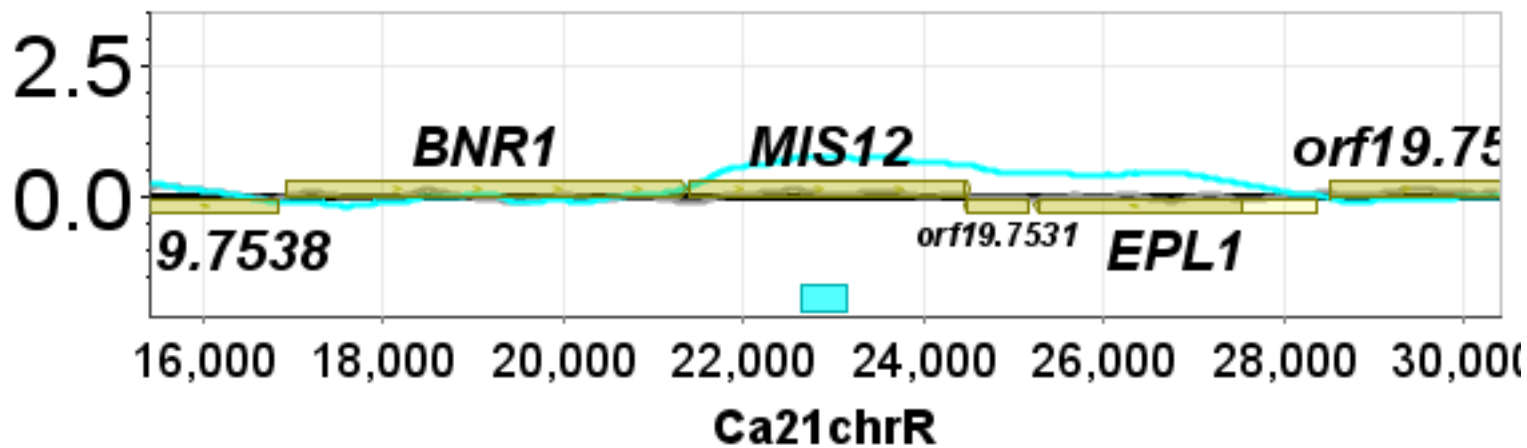

[0.741] Ca21chrR:1518638-1533637 [+] [CRZ2, ntar\_1331, URA2, ALS3]

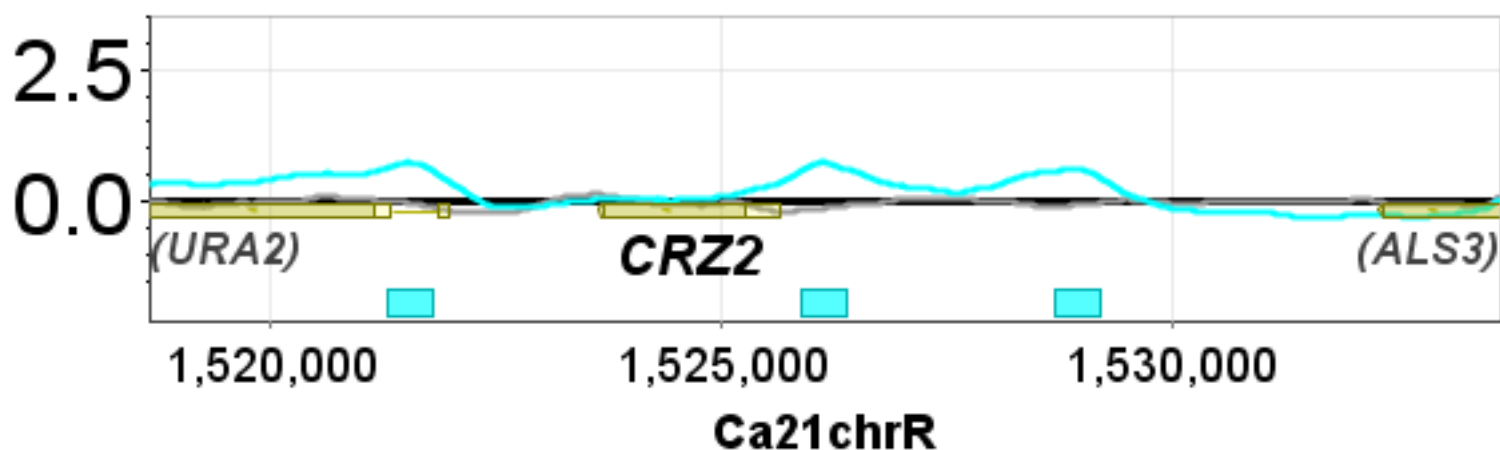

[0.738] Ca21chr3:1059219-1074218 [+] [ARF2, ntar\_609, RPL35, orf19.5963, SNF3]

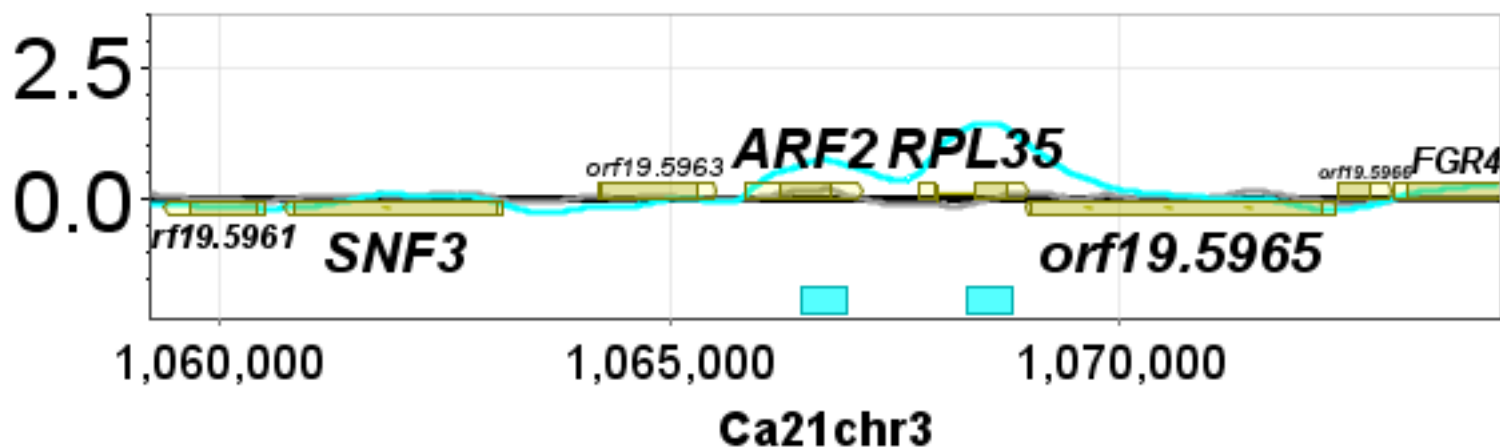

[0.735] Ca21chr1:691165-706164 [+] [RLI1, orf19.3031, ntar\_72, orf19.3035, orf19.3030]

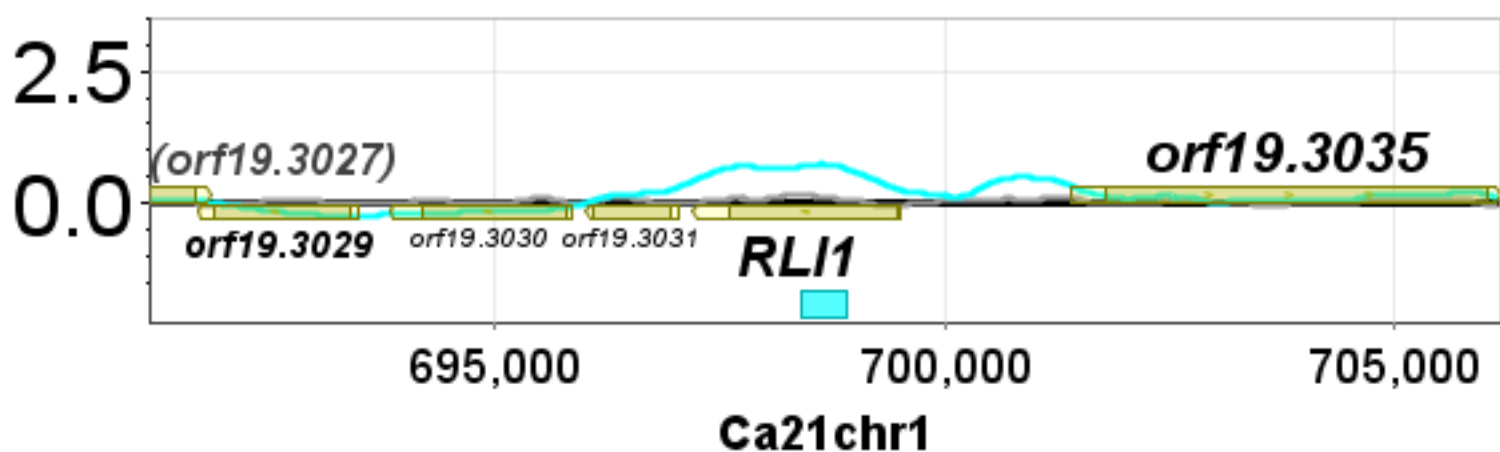

[0.734] Ca21chrR:1514034-1529033 [+] [URA2, CRZ2, SPT10]

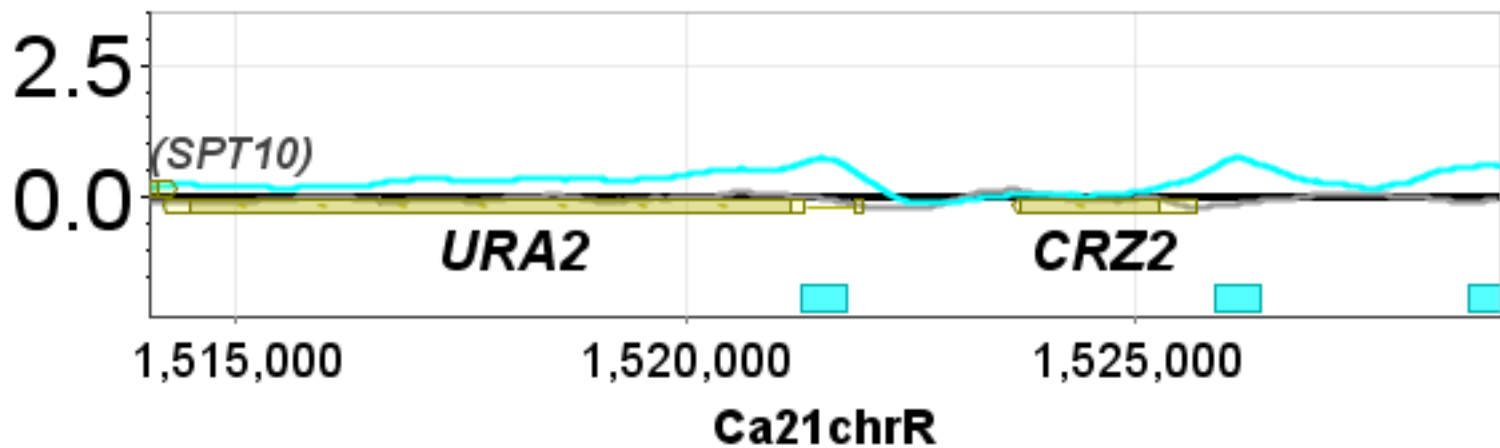

[0.724] Ca21chrR:1715245-1730244 [+] [EFG1, orf19.609, ntar\_1352, ntar\_1353, ntar\_1351]

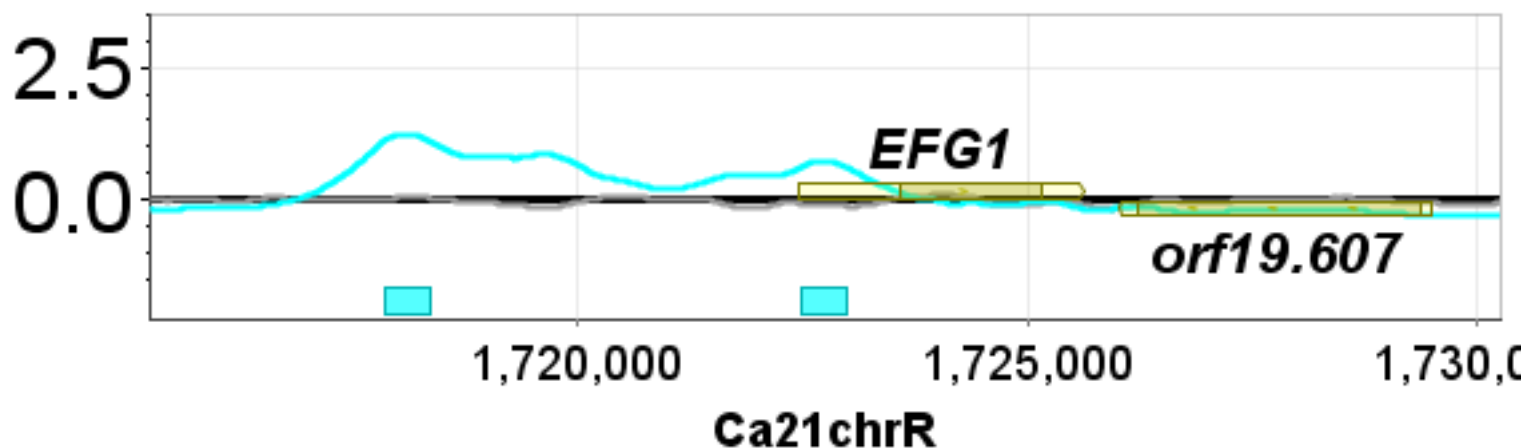

[0.722] Ca21chr4:1491301-1506300 [+] [NOP1, orf19.3136, orf19.3139, orf19.3140, orf19.3140.1]

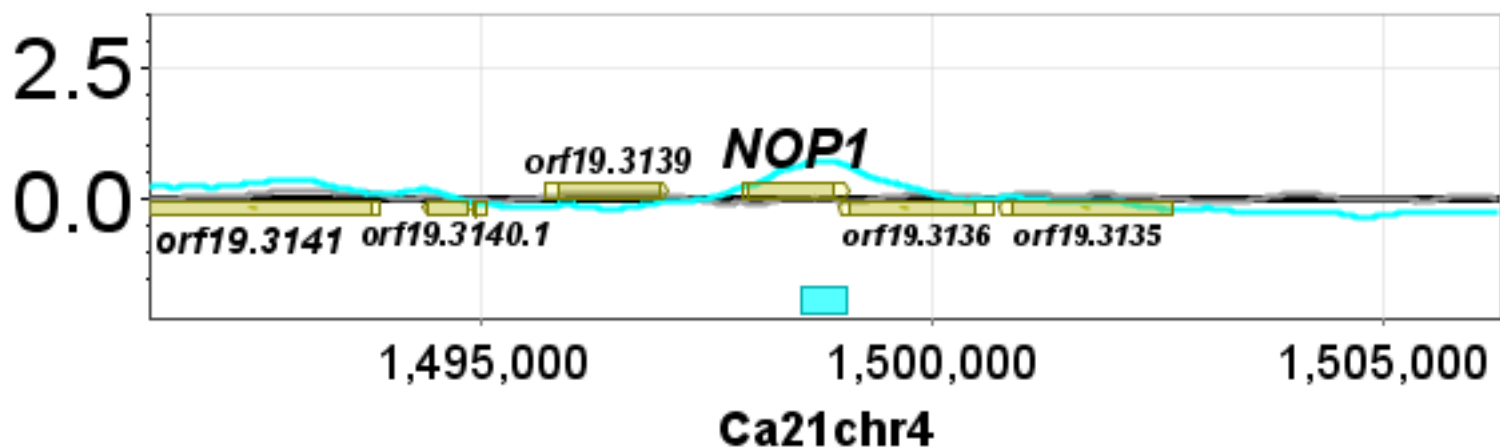

[0.711] Ca21chr5:1138041-1153040 [+] [orf19.4016, orf19.4017, CAG1, orf19.4018, orf19.4019]

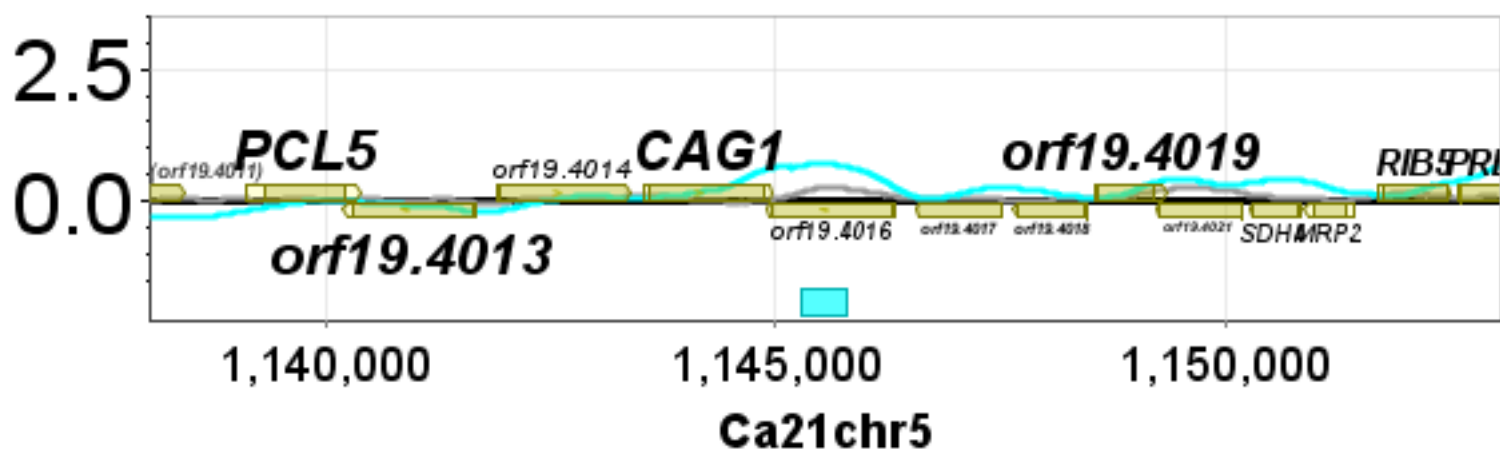

[0.692] Ca21chr3:995516-1010515 [+] [orf19.5933, orf19.5934, orf19.5932, orf19.5935, orf19.5931]

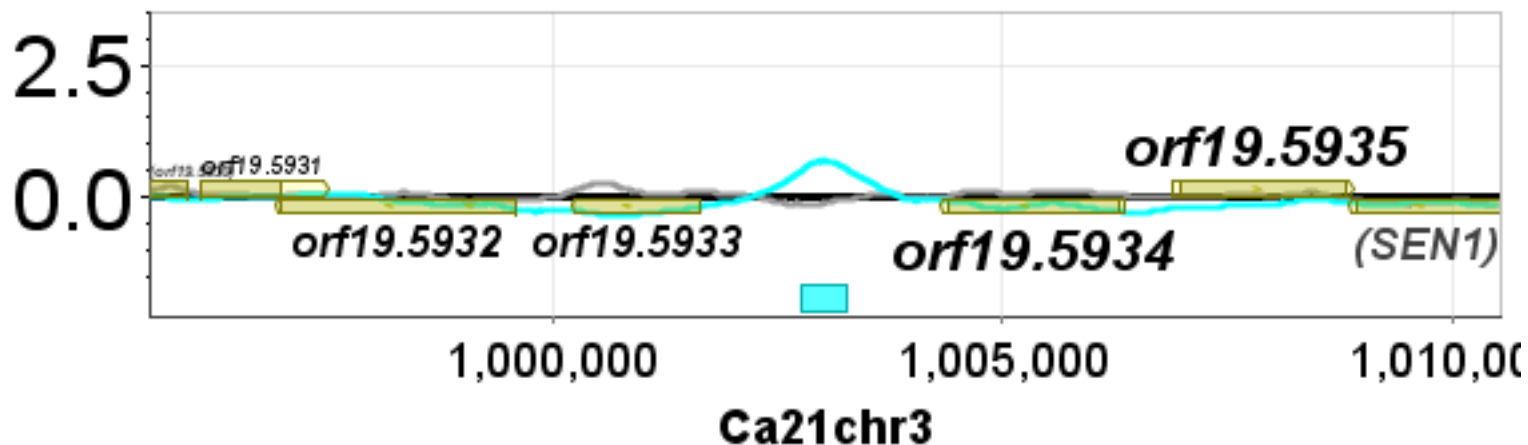

[0.69] Ca21chr1:852492-867491 [+] [orf19.1041, POR1, orf19.1043, ntar\_83, ntar\_84]

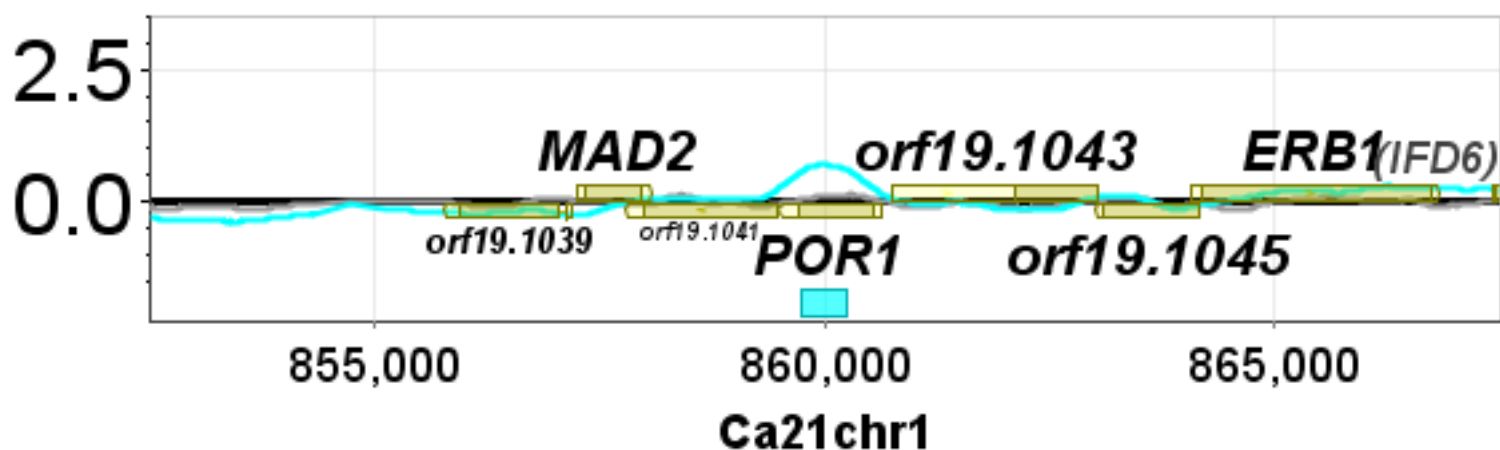

[0.687] Ca21chr2:400312-415311 [+] [orf19.1525, ntar\_323, SPR3, SNF2, FMO1]

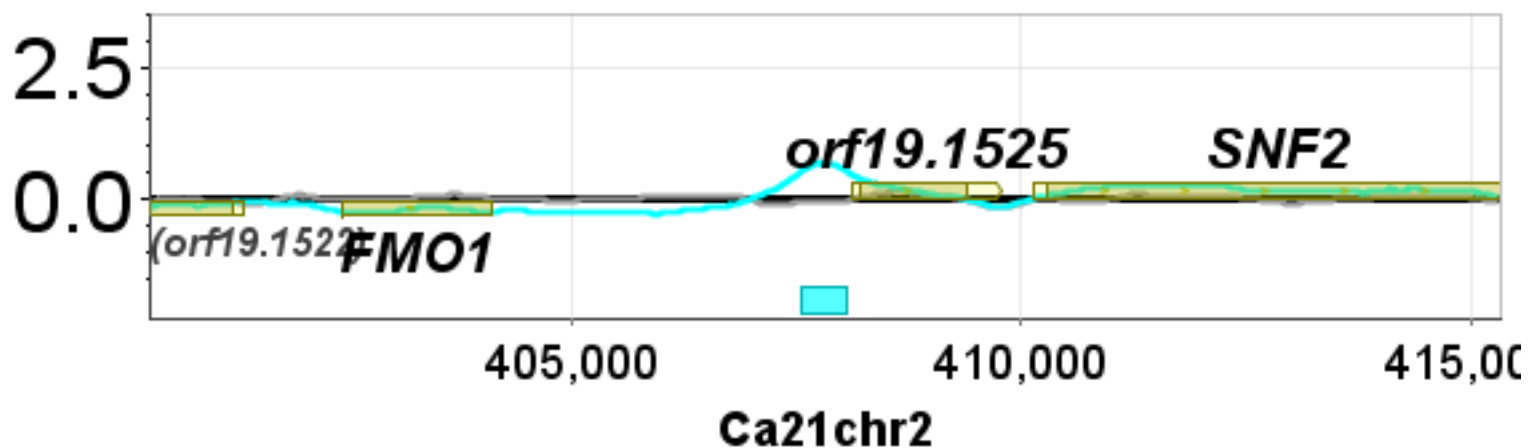

[0.685] Ca21chr4:338766-353765 [+] [orf19.4620, orf19.4621, FBA1, orf19.4617, POL30]

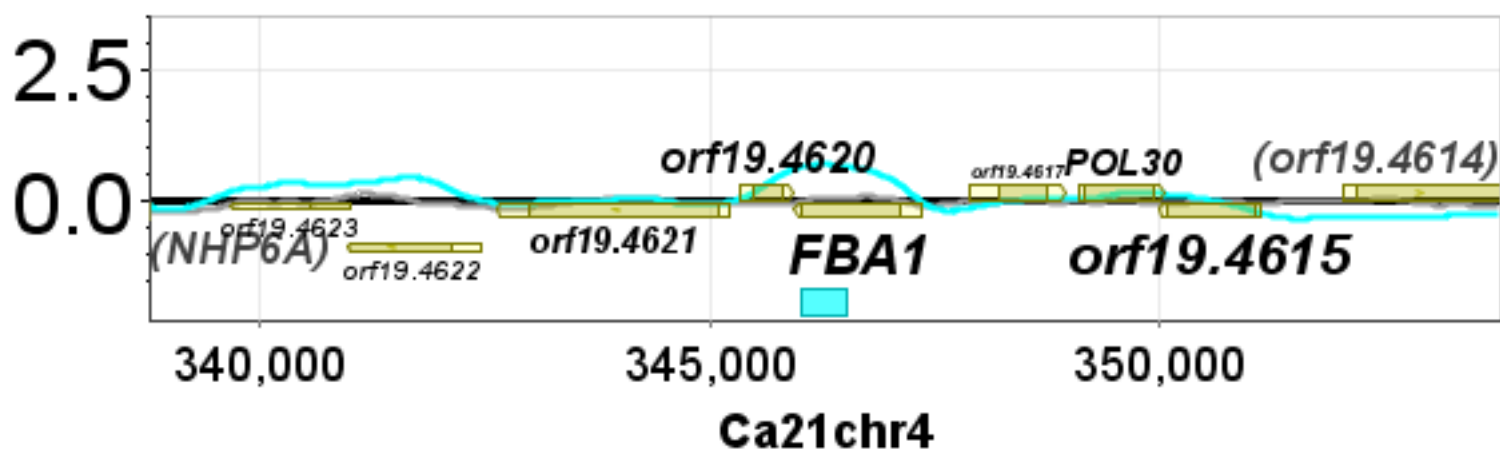

[0.684] Ca21chr4:165542-180541 [+] [ntar\_722, ntar\_723, PTC8, orf19.4699, orf19.4701]

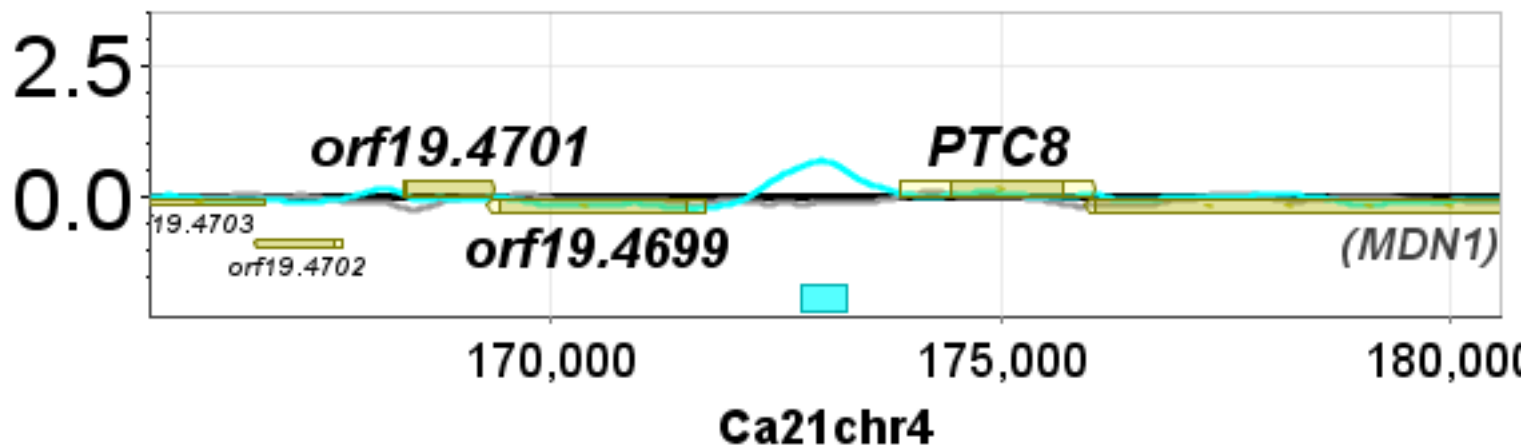

[0.683] Ca21chr1:135253-150252 [+] [HGC1, ntar\_15, ntar\_14, ntar\_16, ROT1]

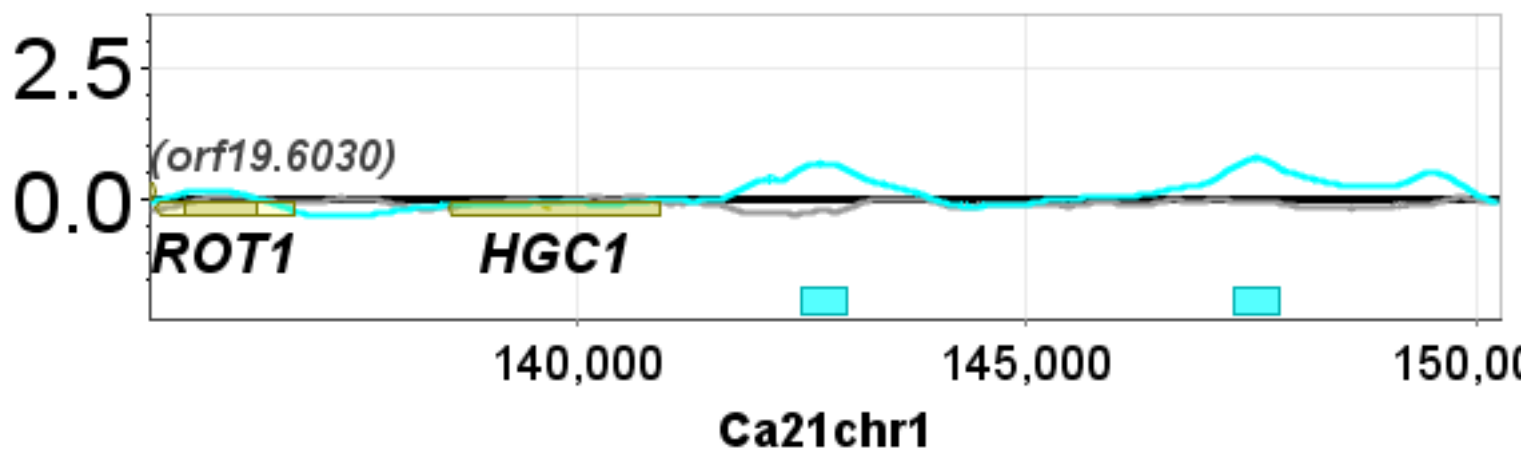

[0.681] Ca21chr1:1061633-1076632 [+] [ARO4, orf19.4059, orf19.4061, orf19.4062, orf19.4057]

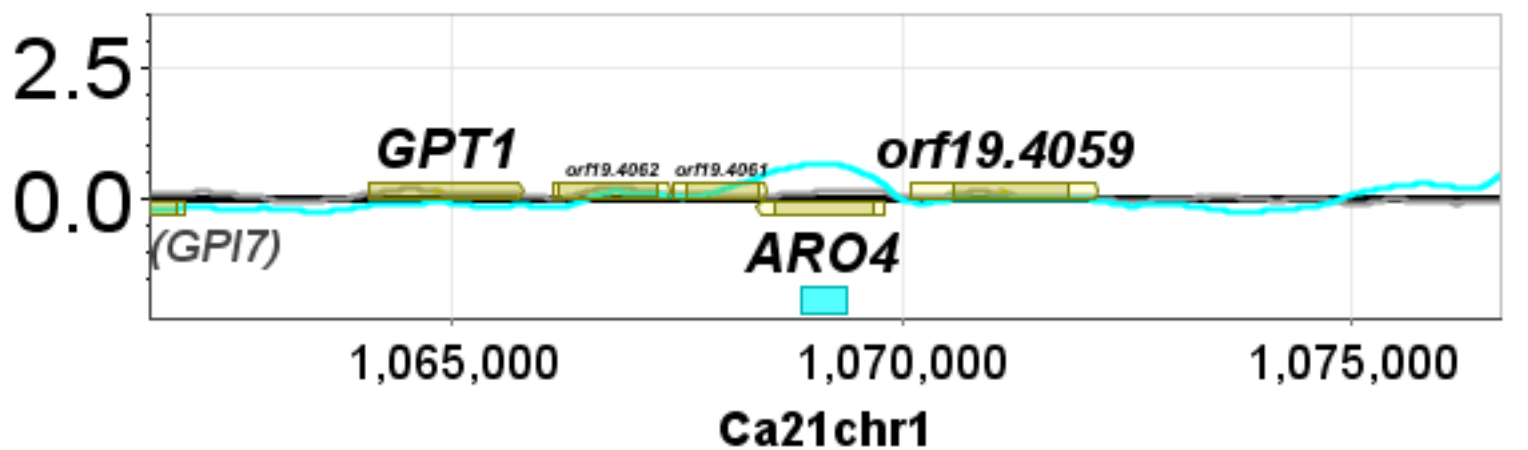

[0.673] Ca21chr1:1820186-1835185 [+] [TKL1, ADH2, OPY2, orf19.5114, orf19.5114.1]

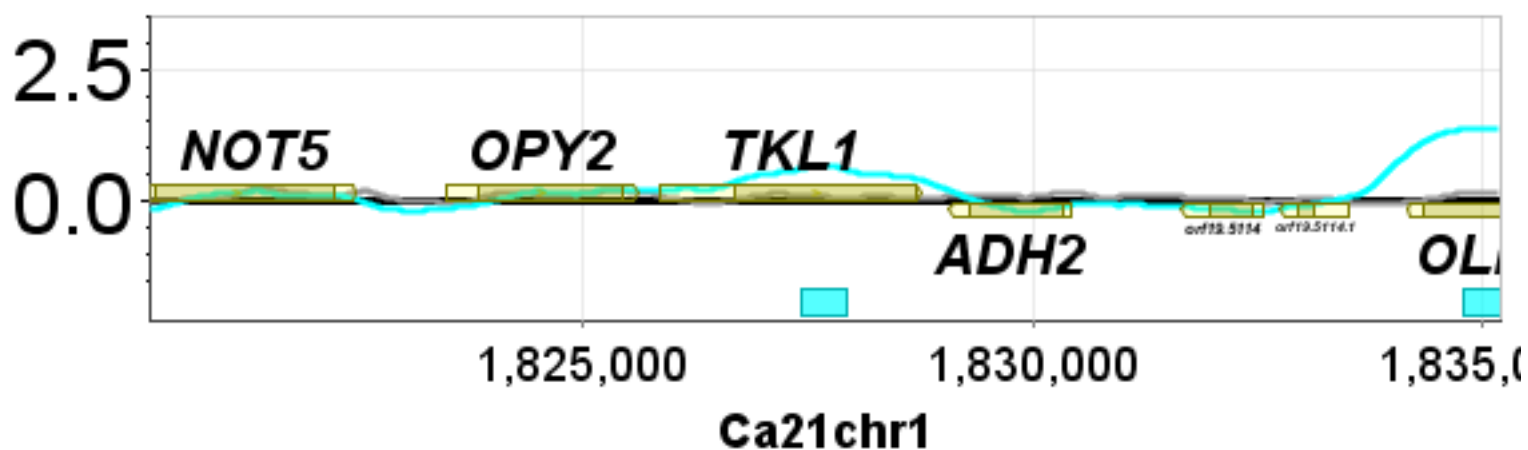

[0.673] Ca21chr5:634883-649882 [+] [orf19.4312, YNK1, orf19.4310, GRP2, ntar\_906]

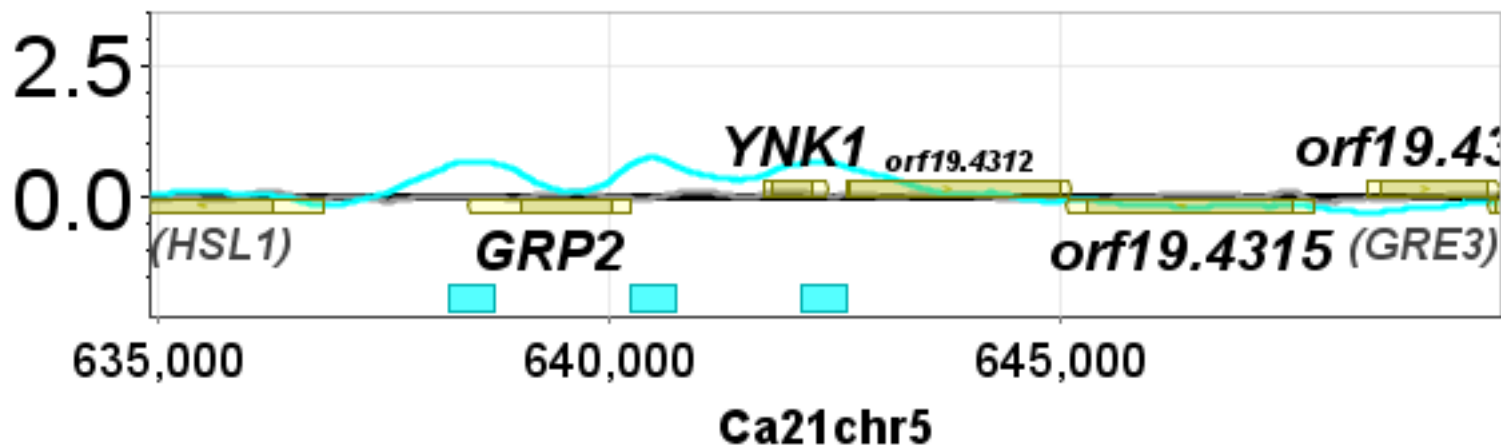

[0.672] Ca21chr7:128459-143458 [+] [MET28, orf19.7044, RTF1, RPS28B, ntar\_1061]

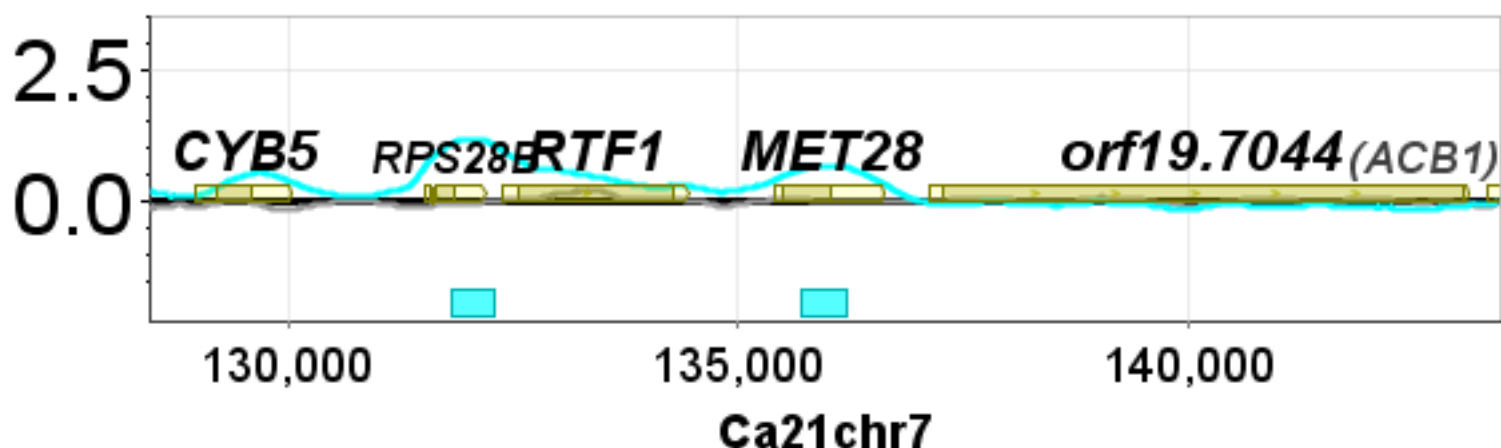

[0.671] Ca21chr2:1845282-1860281 [+] [ASN1, ntar\_468, orf19.199, orf19.200, orf19.4066]

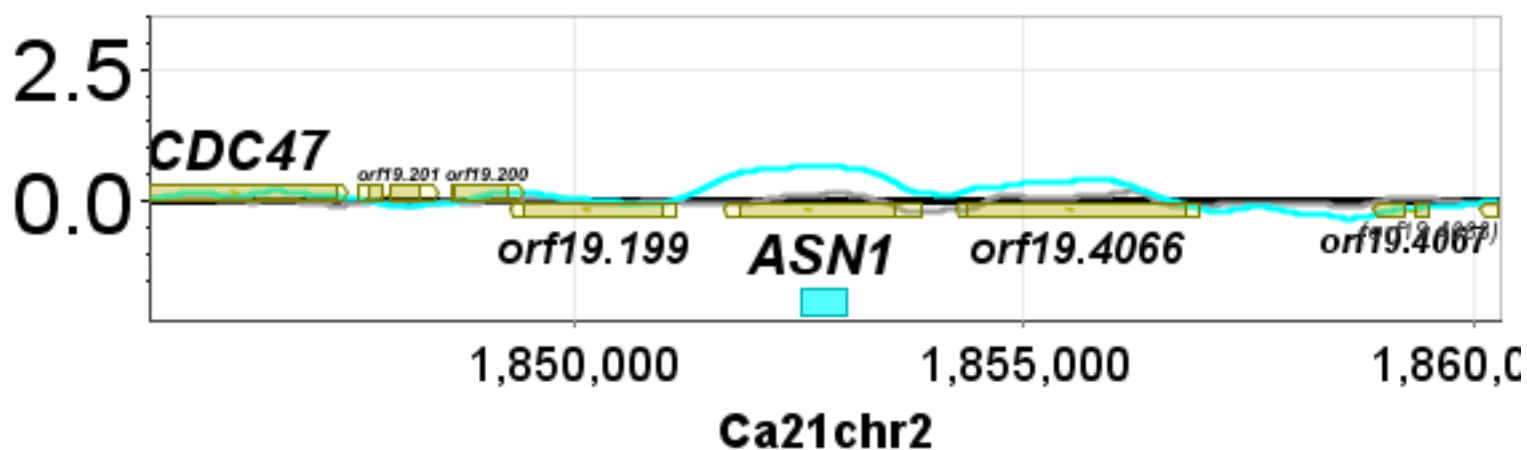

[0.666] Ca21chr1:3102580-3117579 [+] [RBE1, RPL4B, ntar\_278, FTR1, orf19.7216]

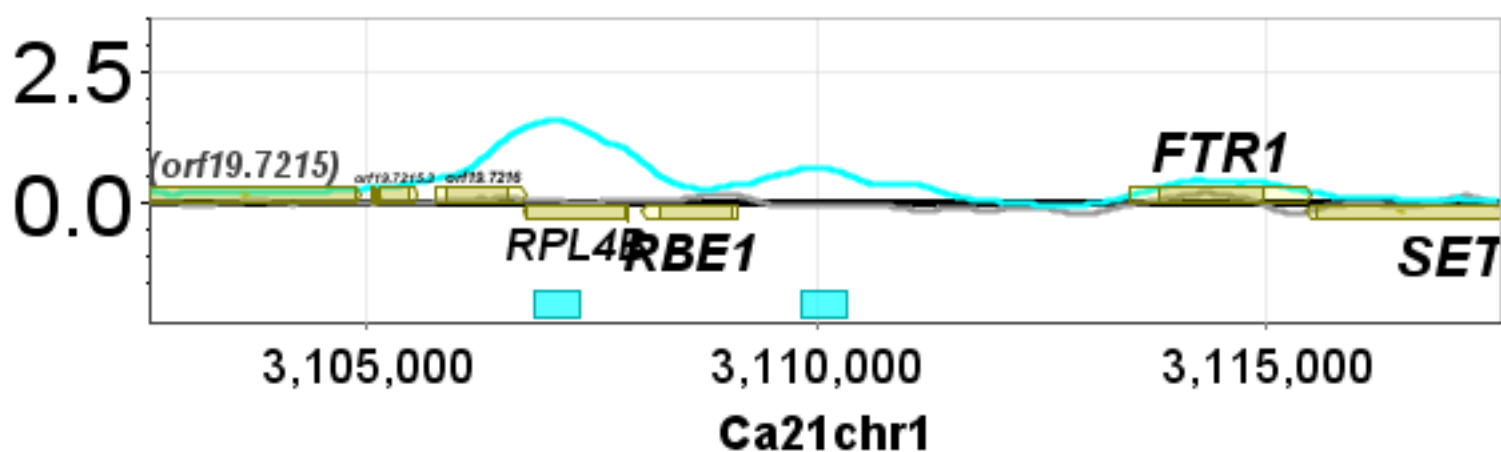

[0.665] Ca21chr5:257912-272911 [+] [orf19.1956, ntar\_1424, orf19.1955, PUS4, orf19.1953]

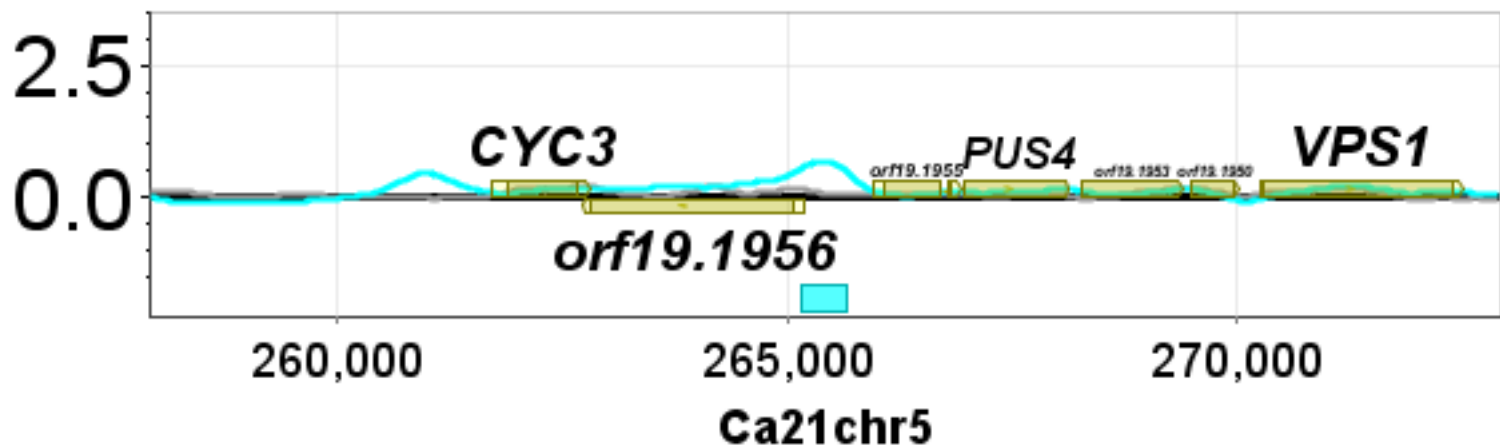

[0.662] Ca21chr4:565305-580304 [+] [orf19.2724, ntar\_770, HIT1, orf19.2725, CGR1]

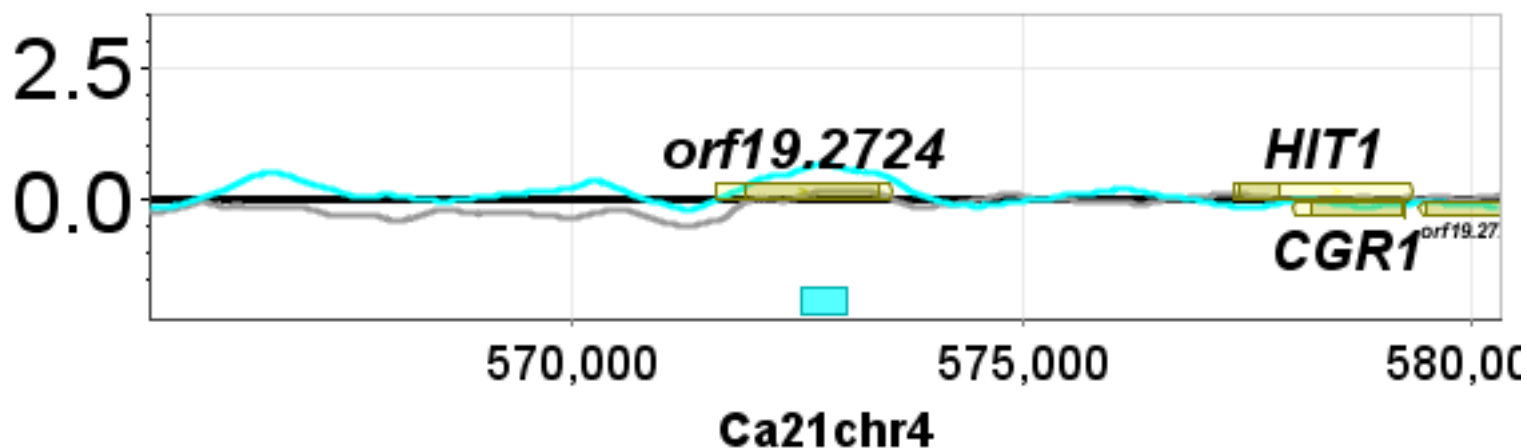

[0.662] Ca21chr5:725746-740745 [+] [RMS1, BUB3, orf19.2657, orf19.2653]

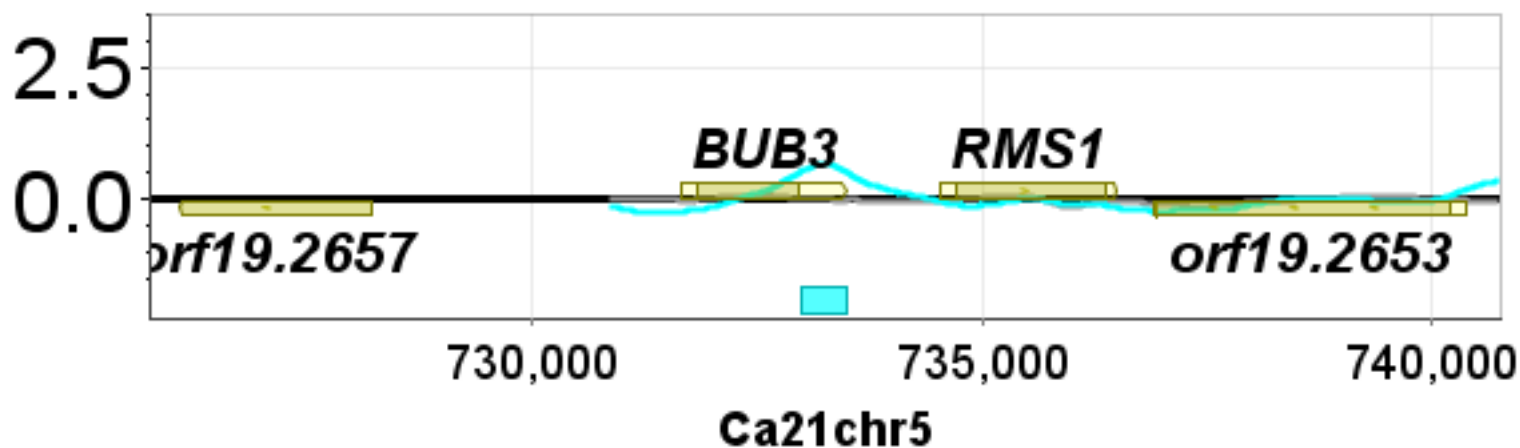

[0.661] Ca21chr1:2123117-2138116 [+] [orf19.4831, orf19.4830, MLS1, orf19.4834, DOA1]

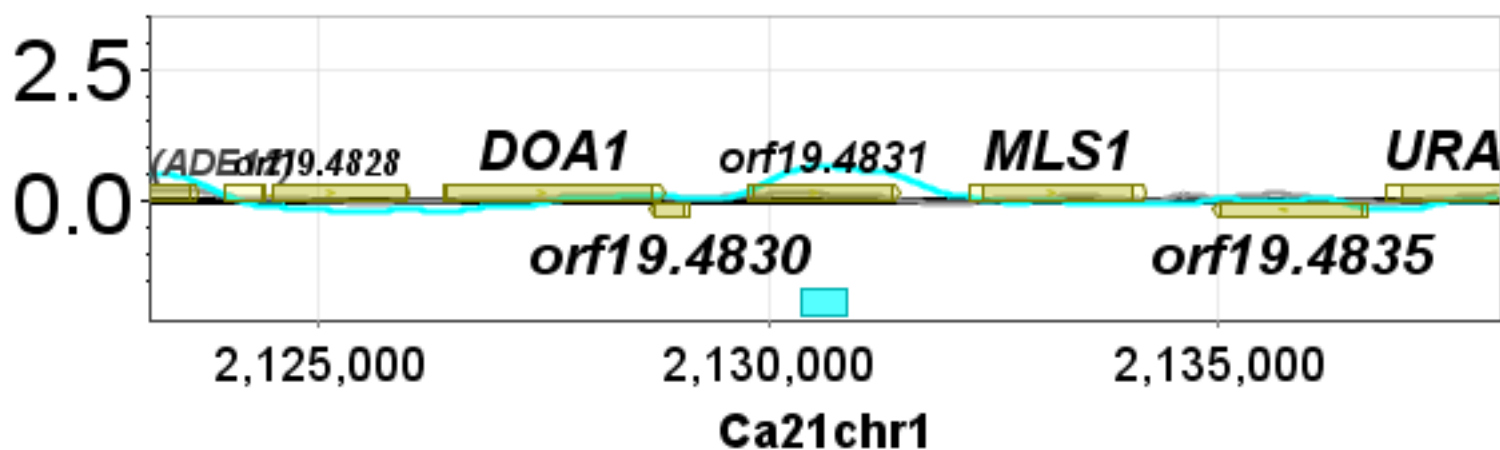

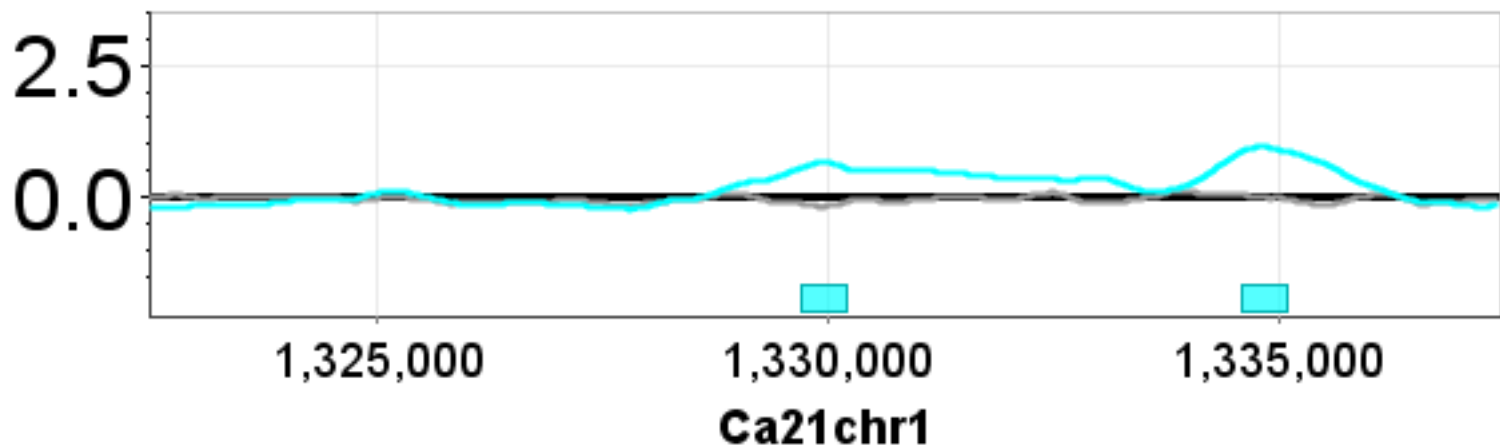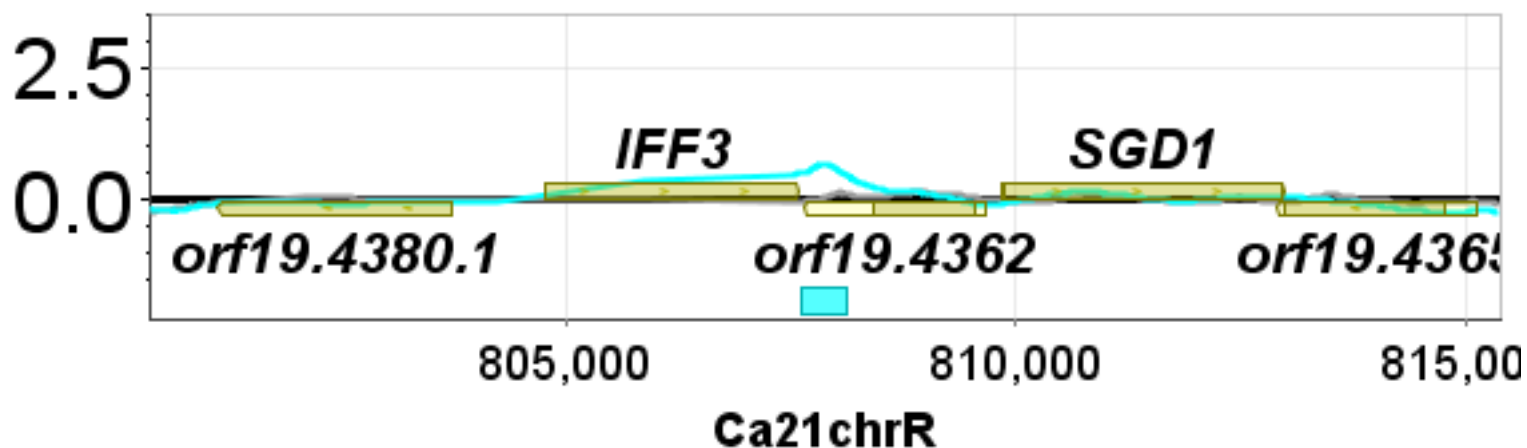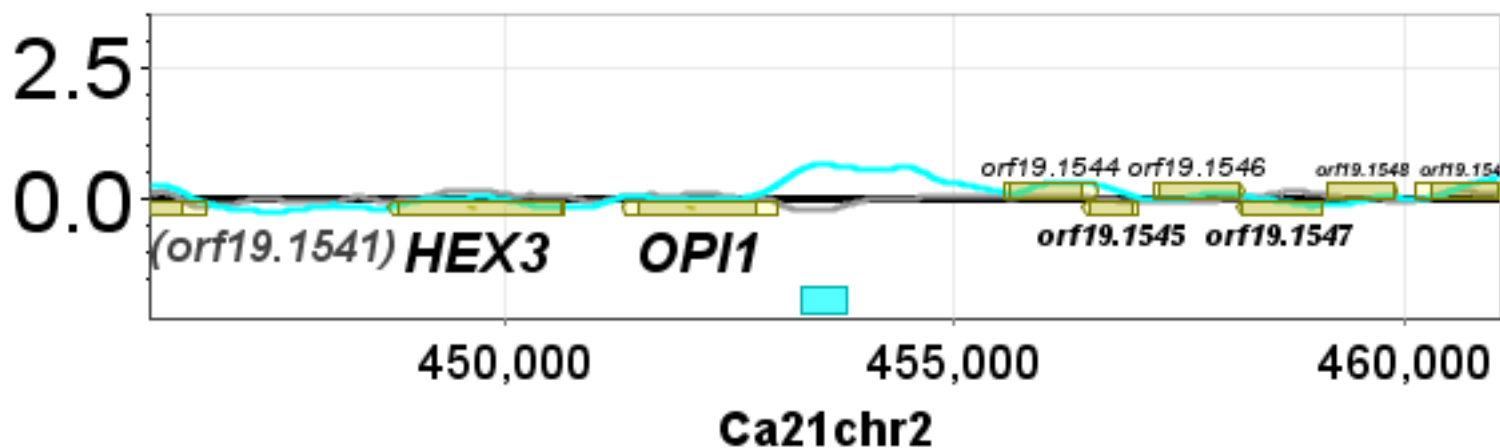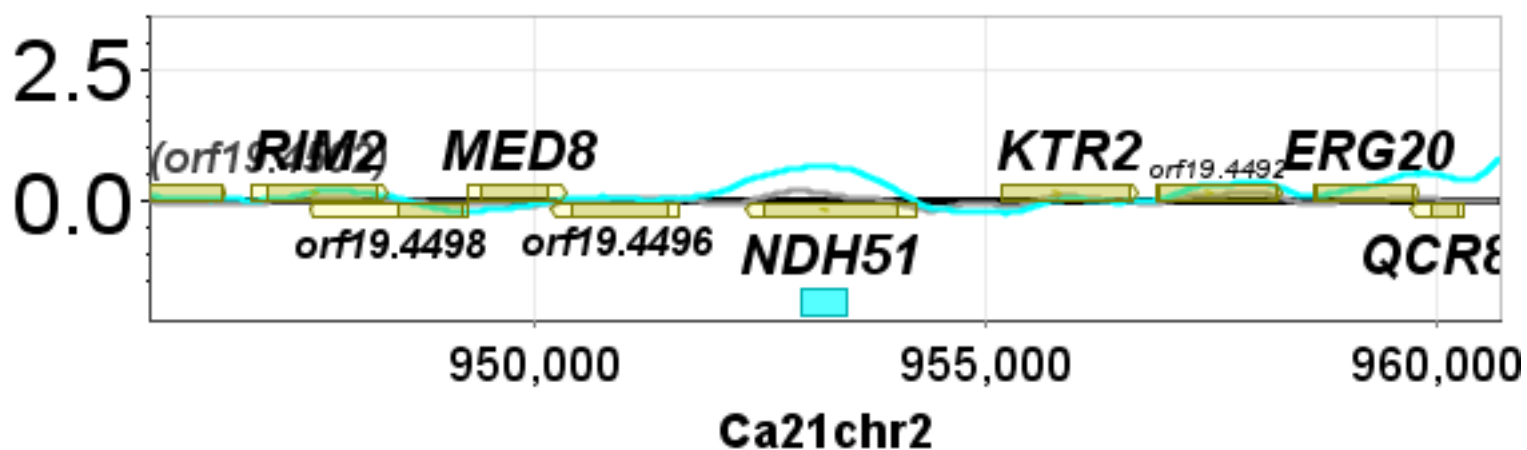



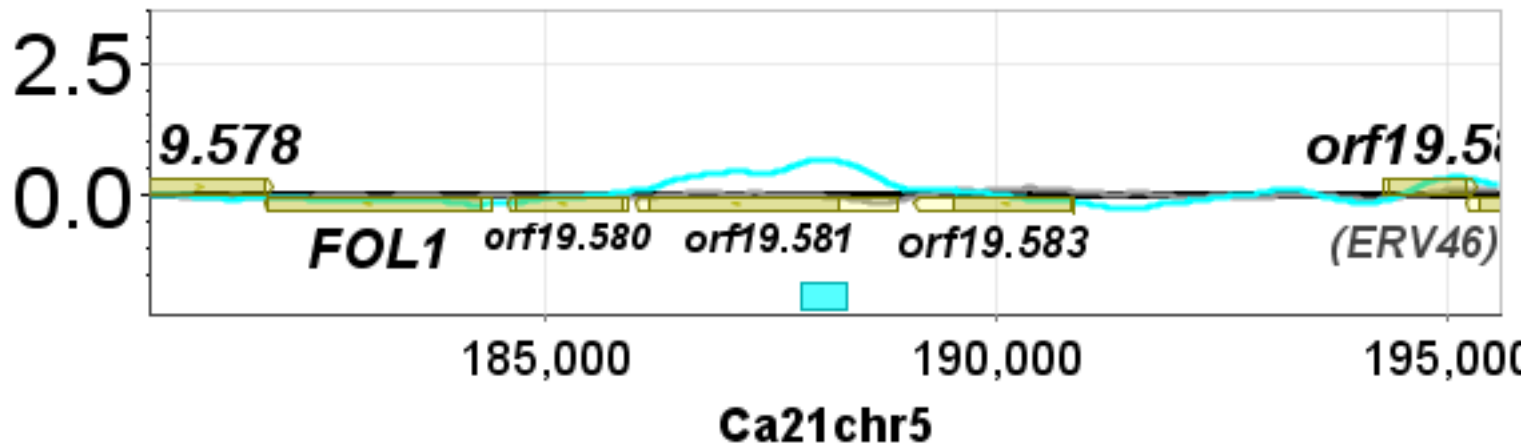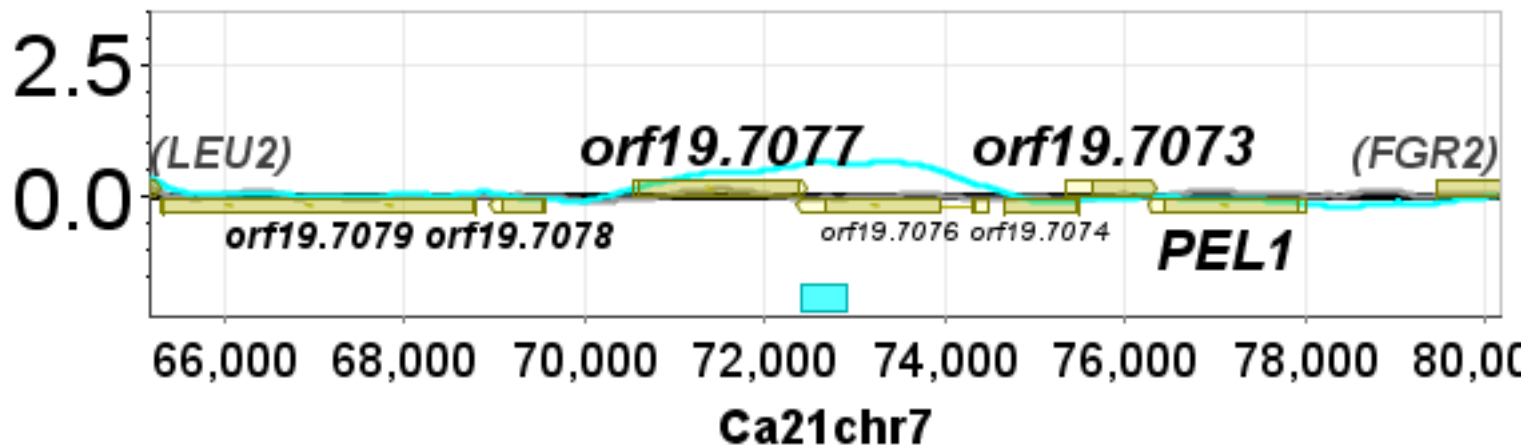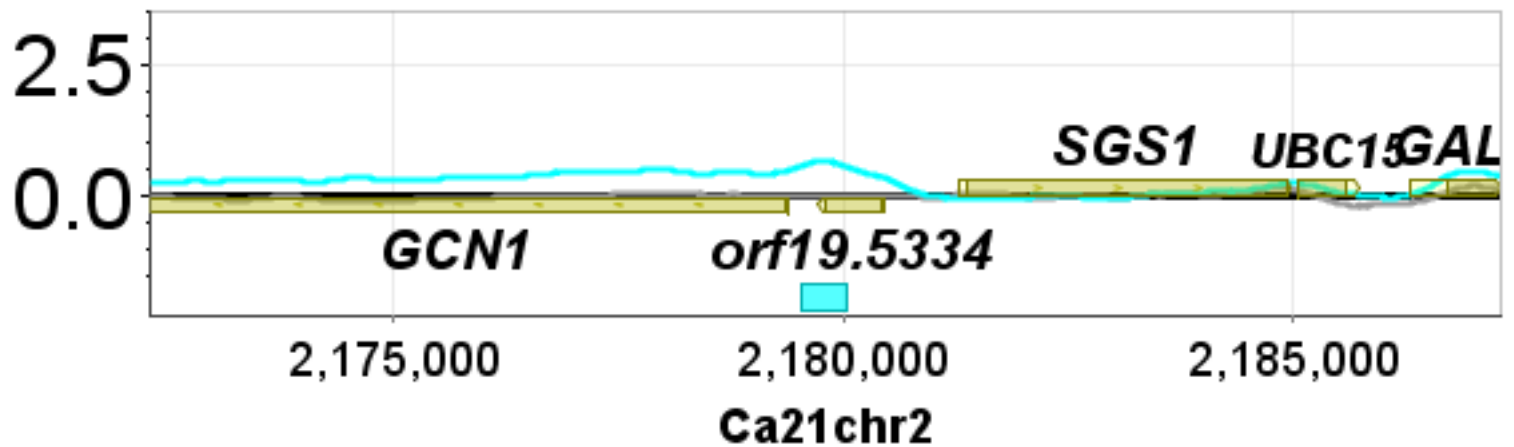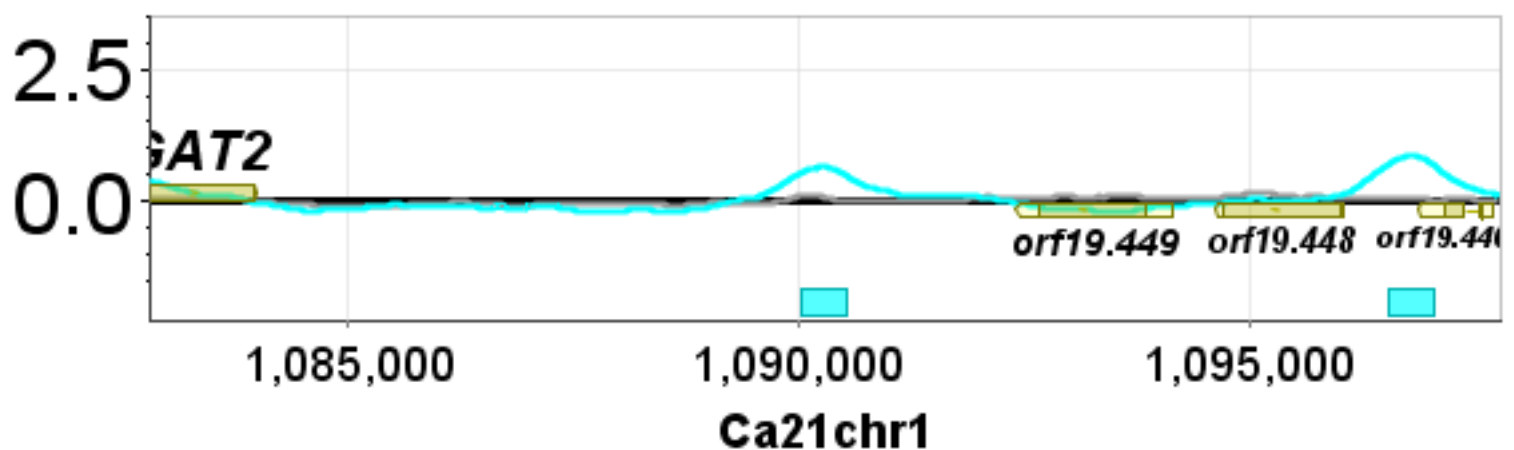

[0.642] Ca21chr2:2209135-2224134 [+] [orf19.5363, orf19.5364, PSO2, RPC11, orf19.5358]

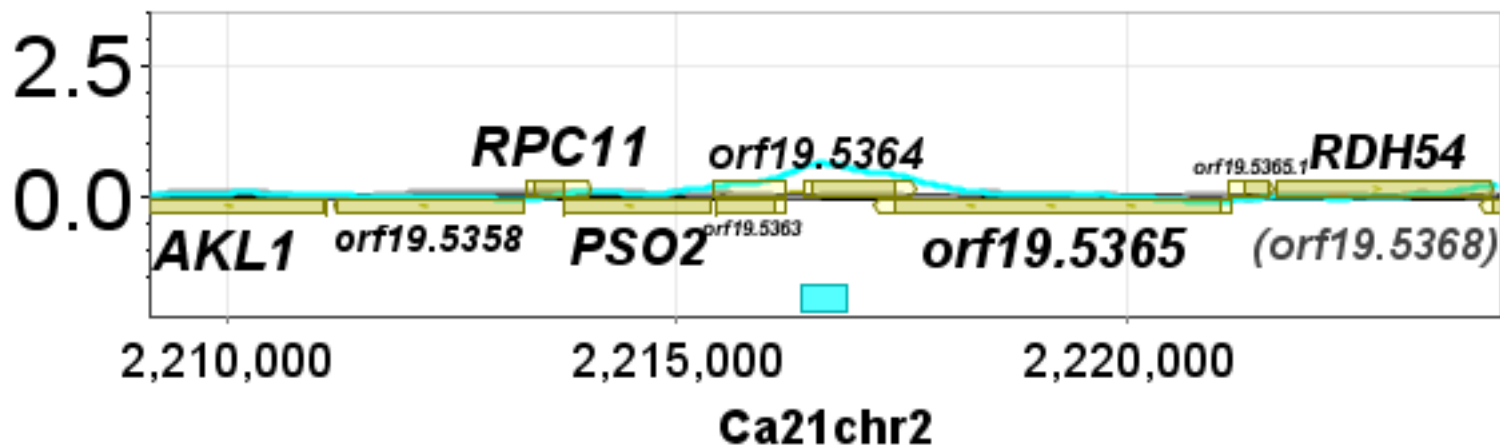

[0.642] Ca21chr4:597229-612228 [+] [Intar\_772, orf19.2701, orf19.2703, ABP1, orf19.2704]

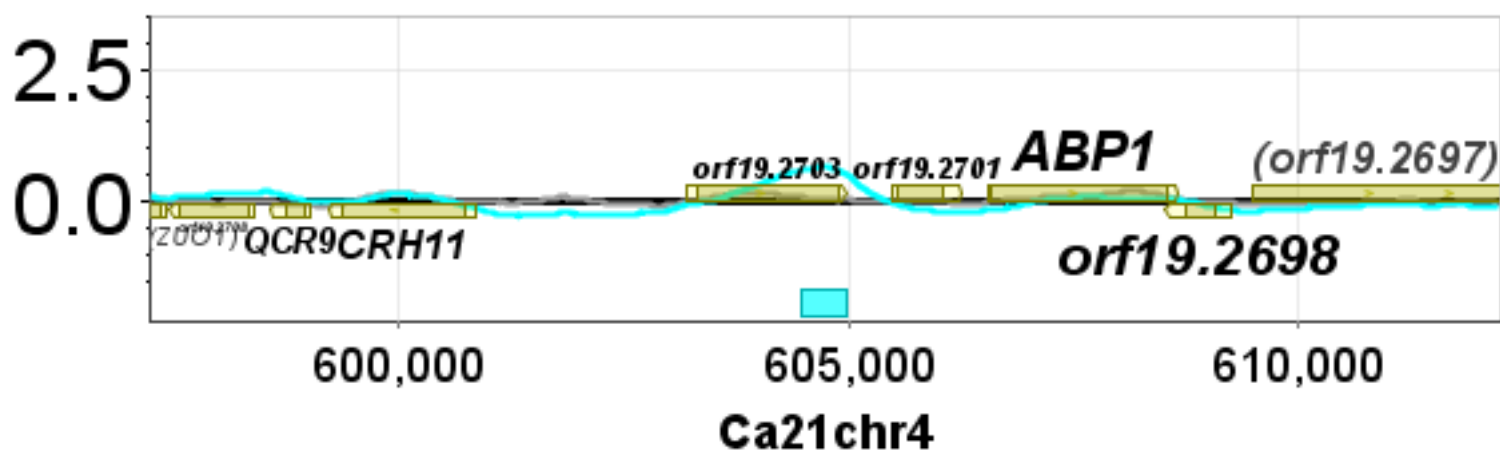

[0.641] Ca21chr3:1353395-1368394 [+] [orf19.7381, CAM1]

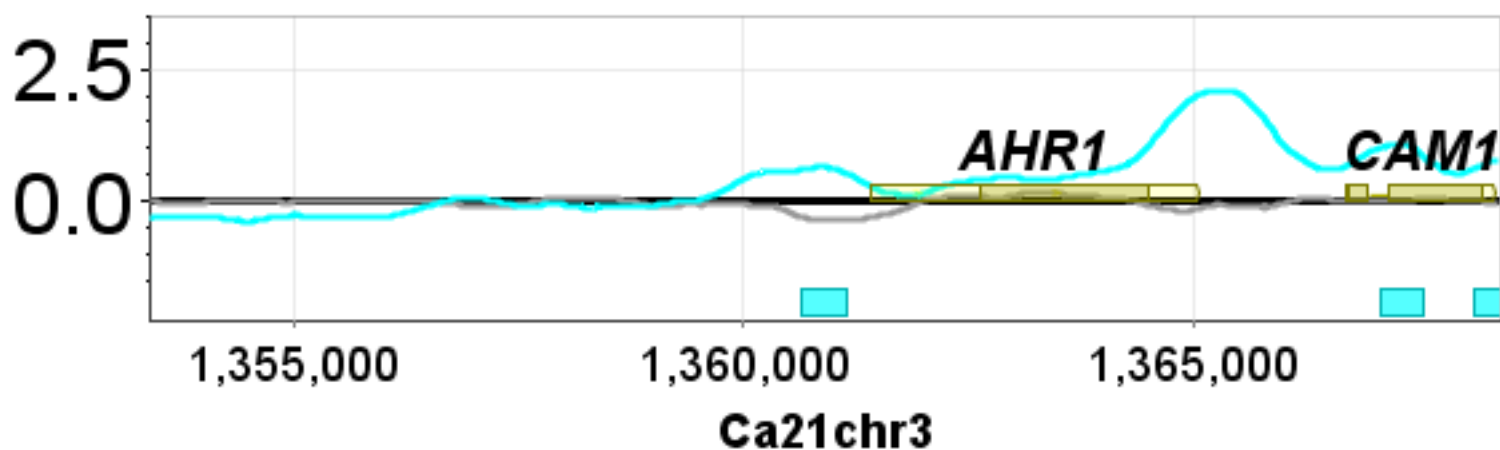

[0.641] Ca21chr5:311933-326932 [+] [Intar\_872, orf19.4132, orf19.4131, orf19.4133, orf19.4134]

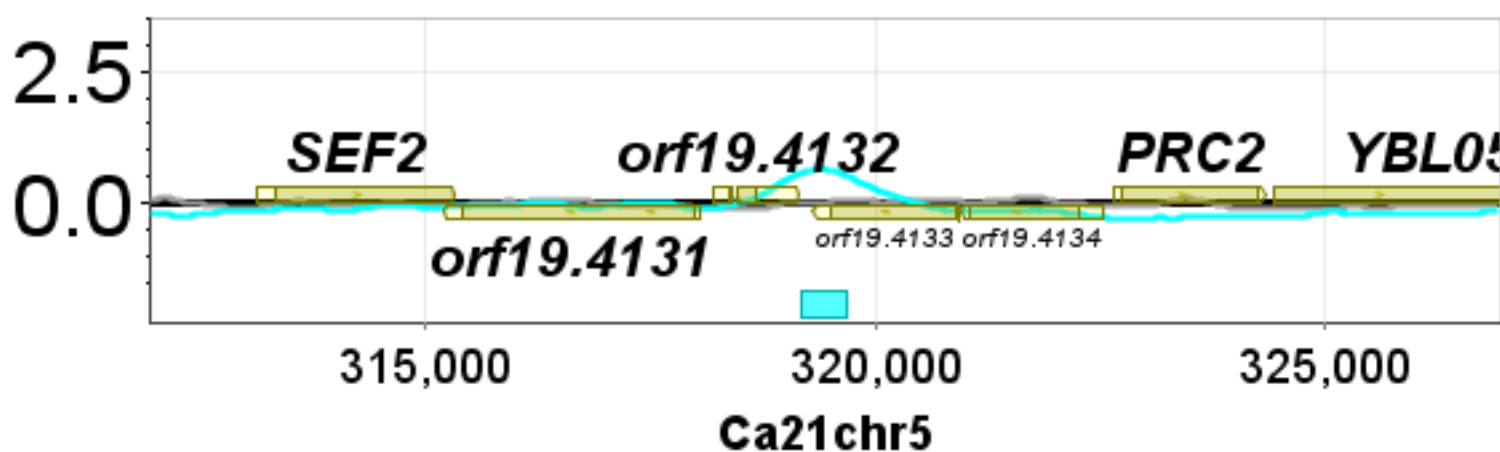

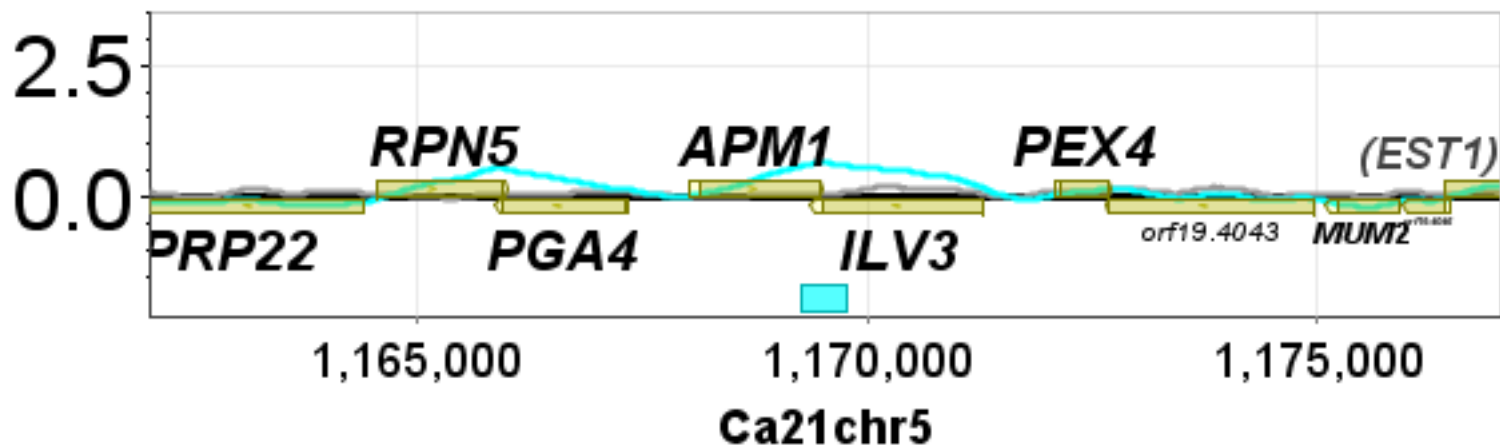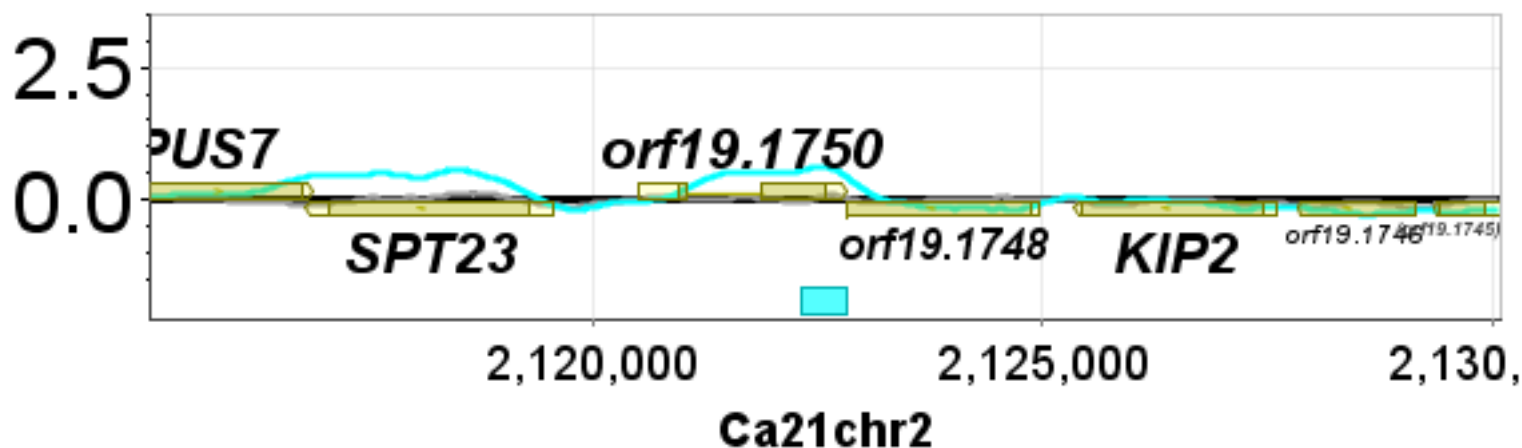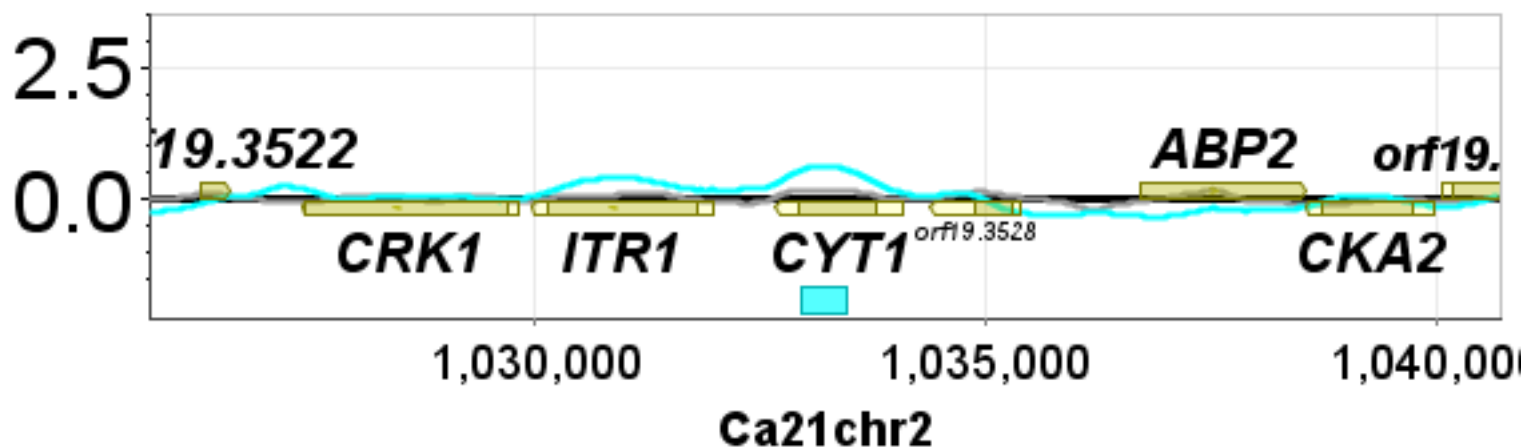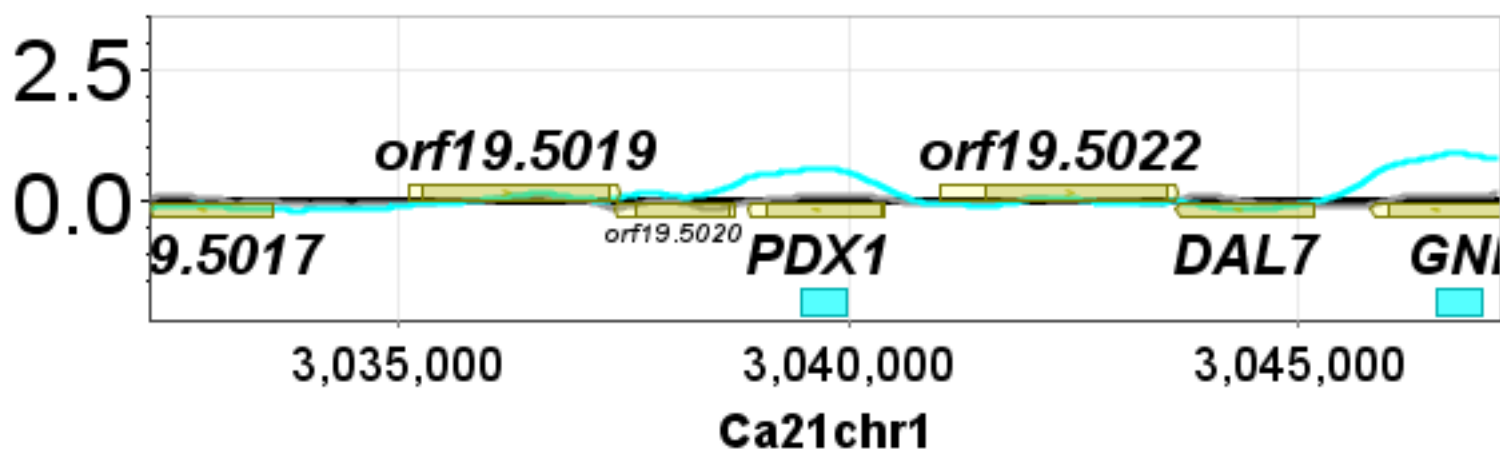

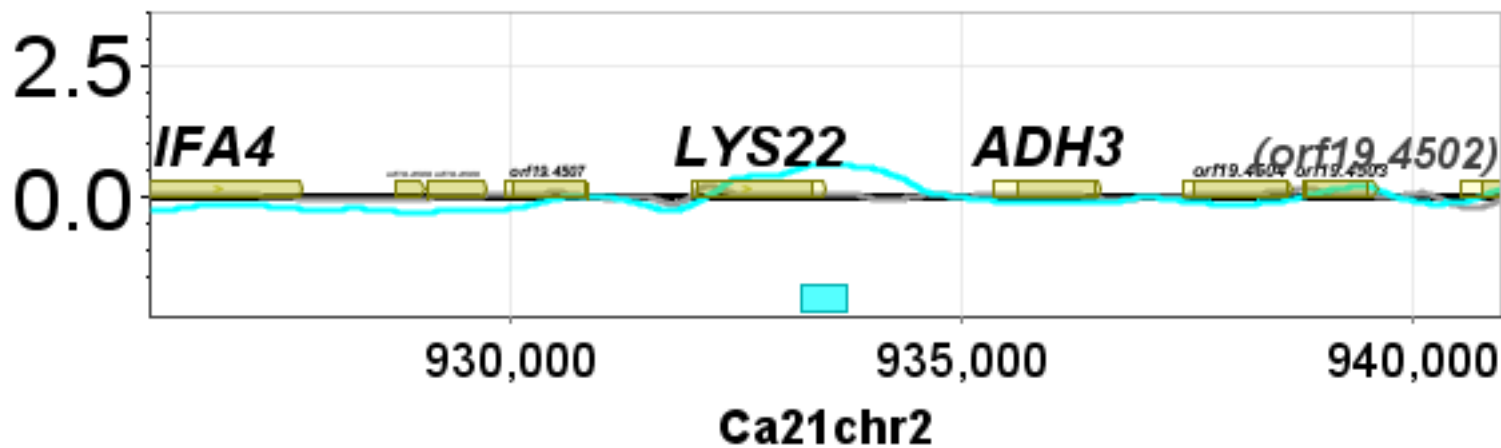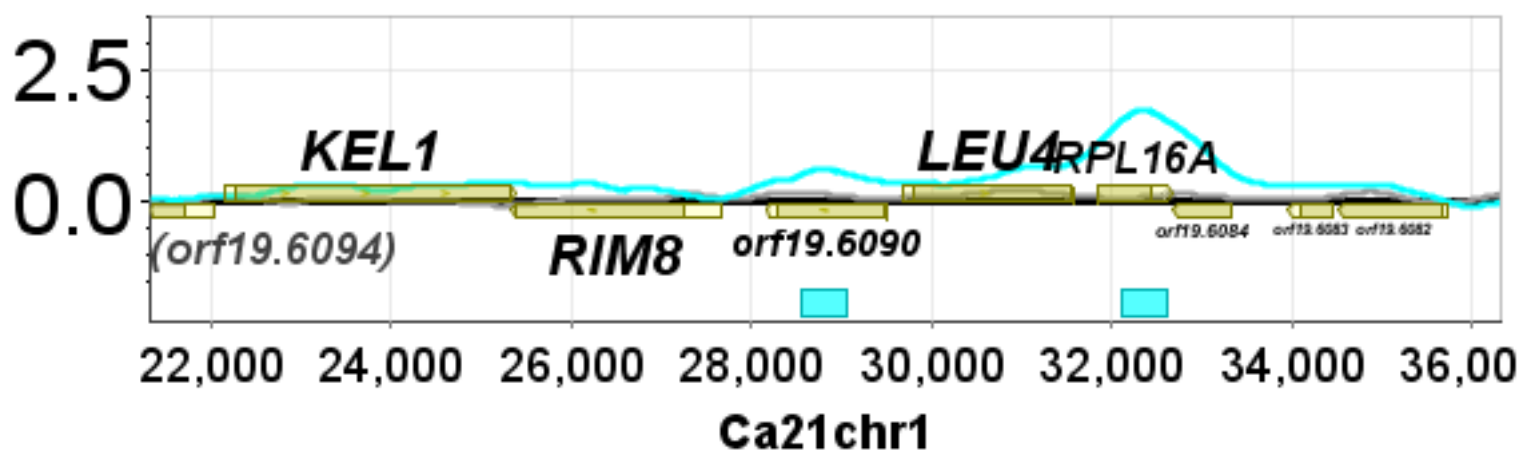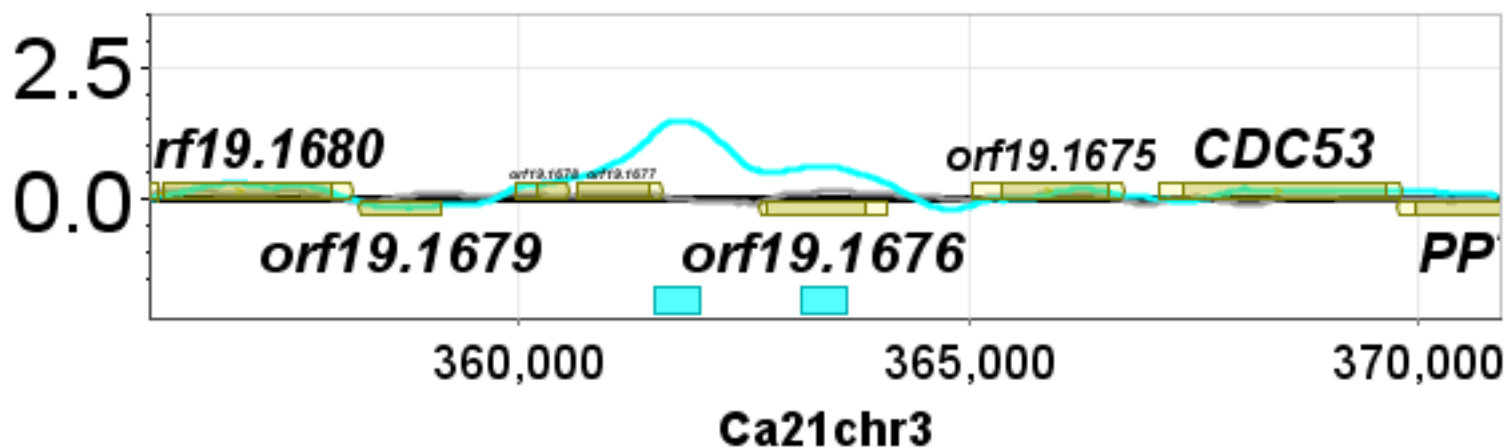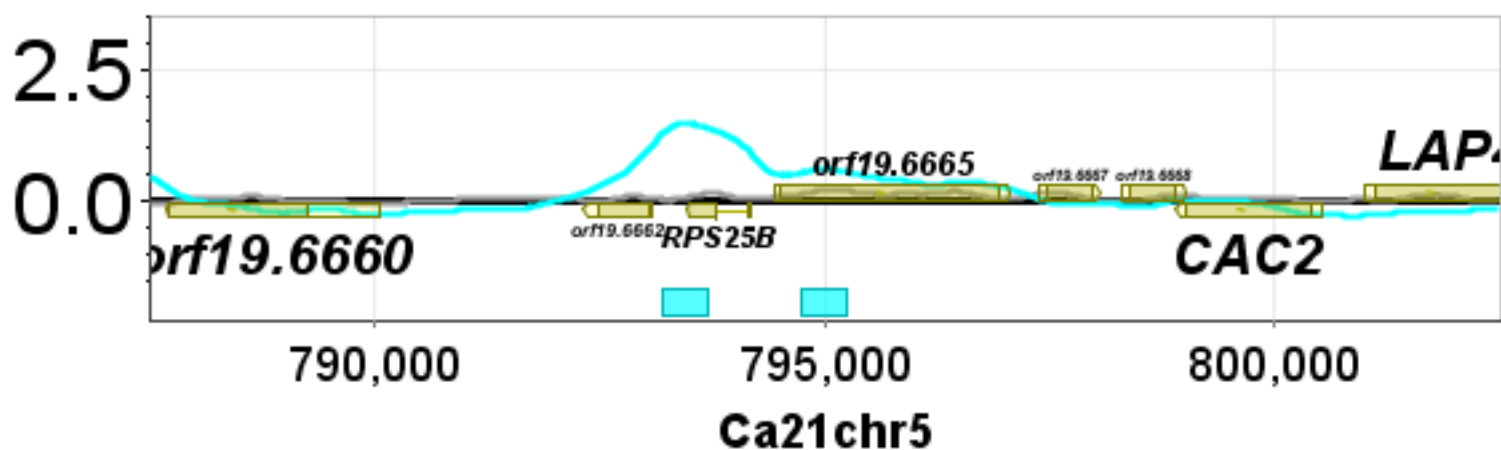

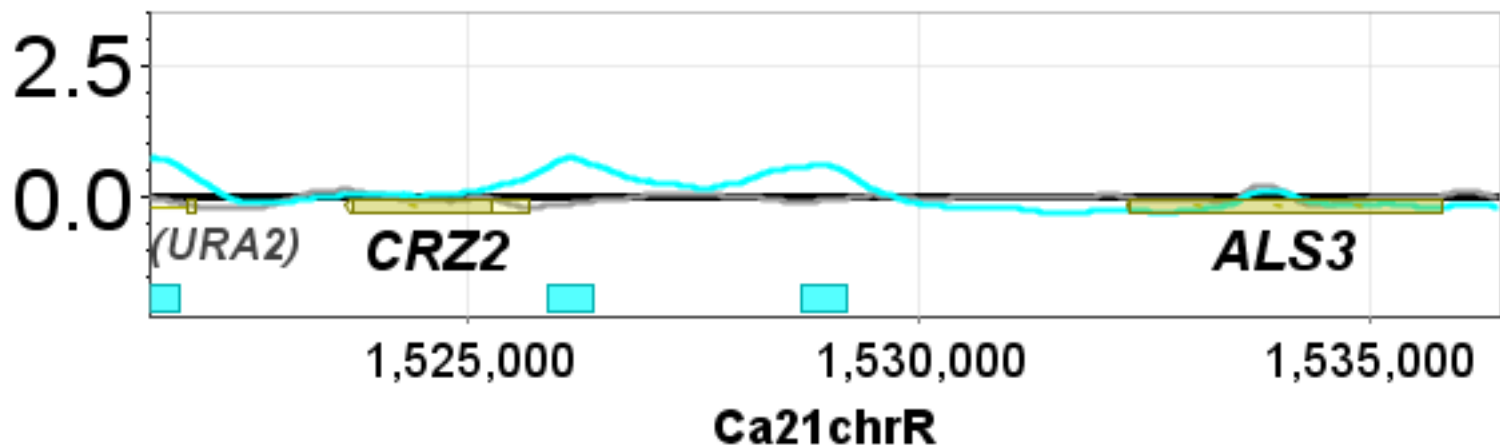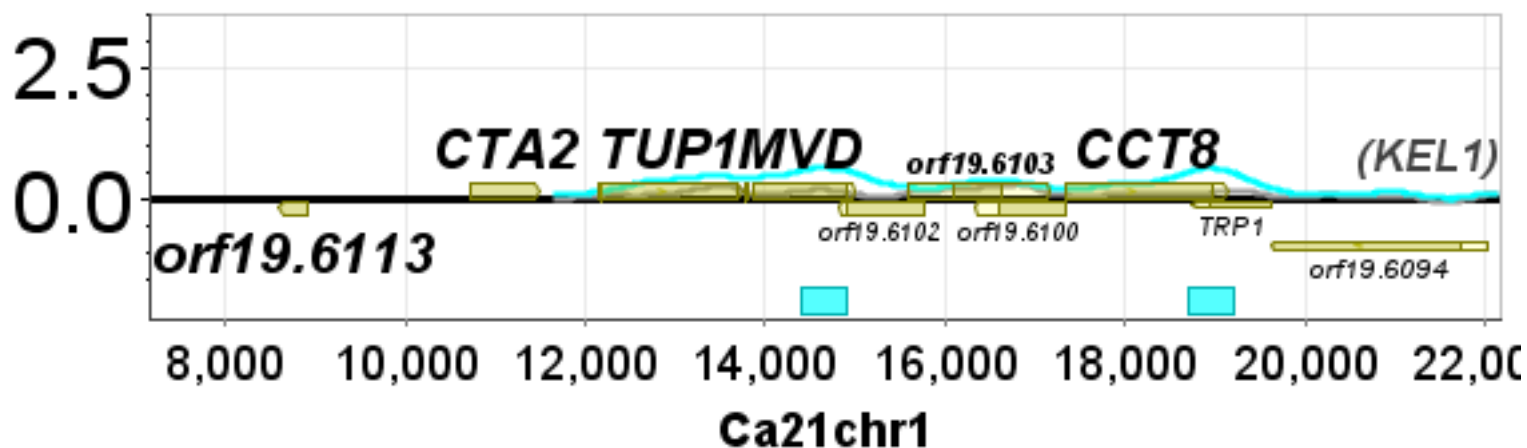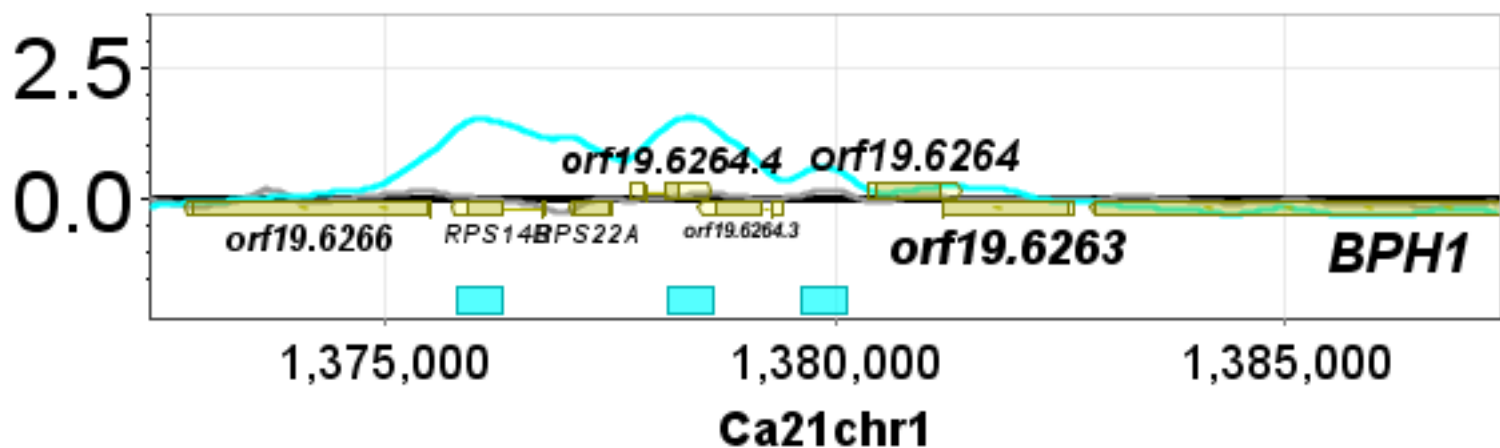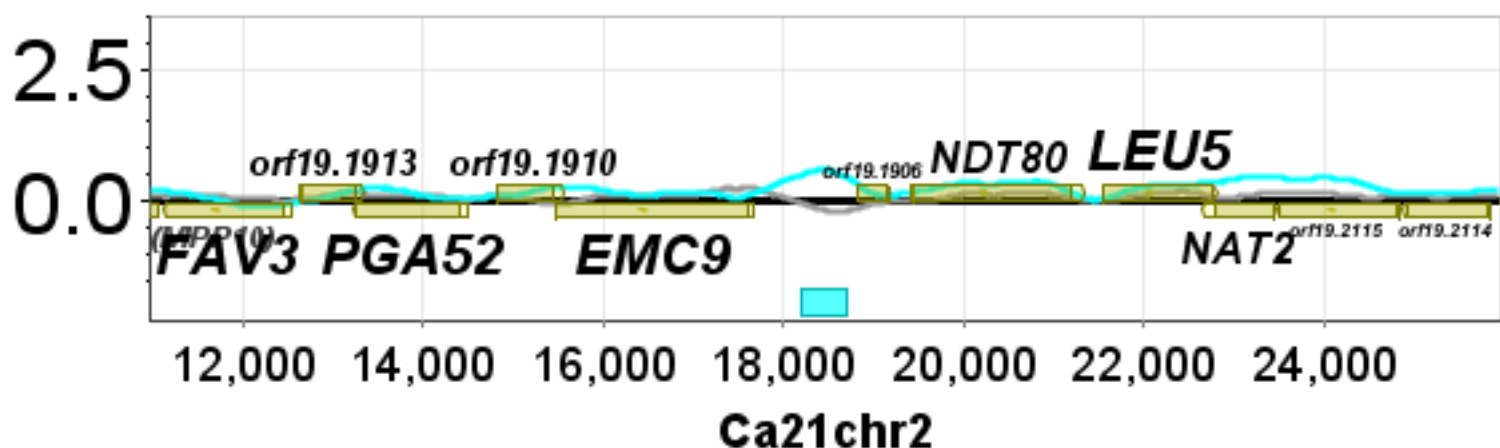

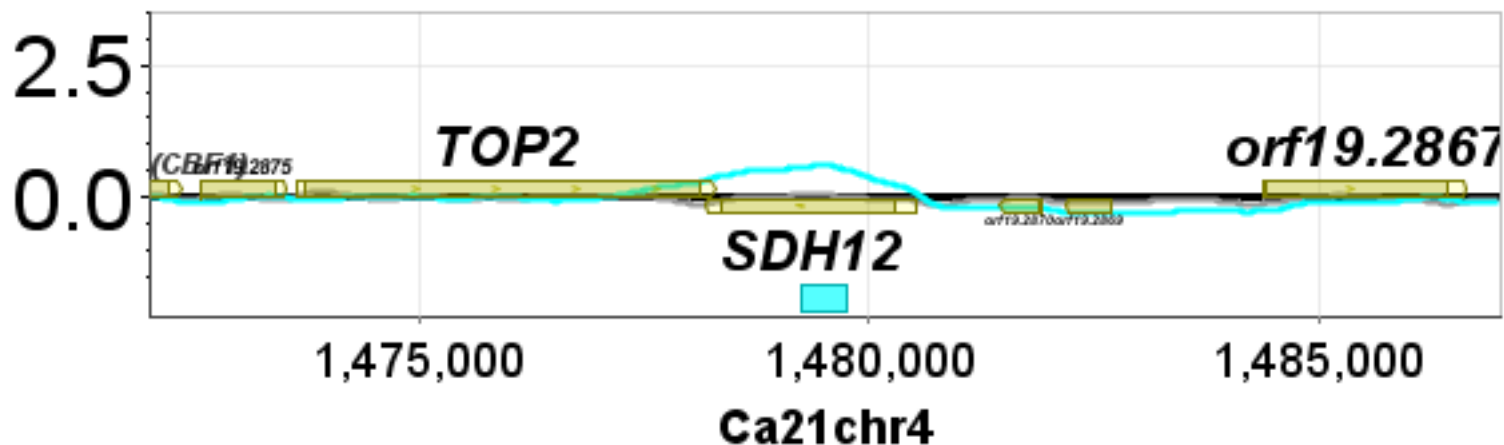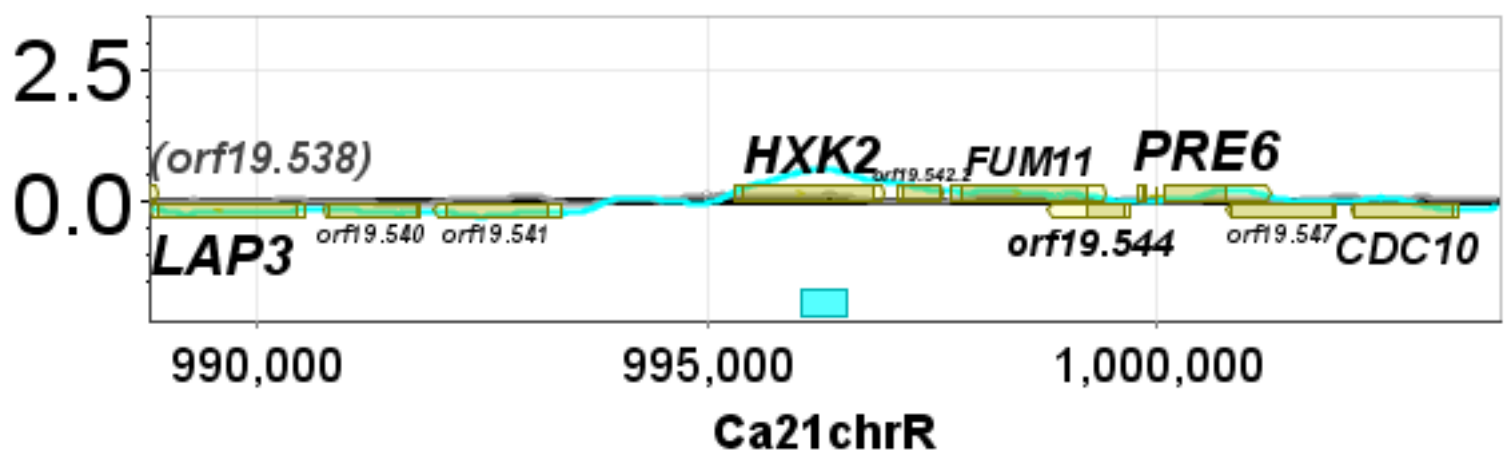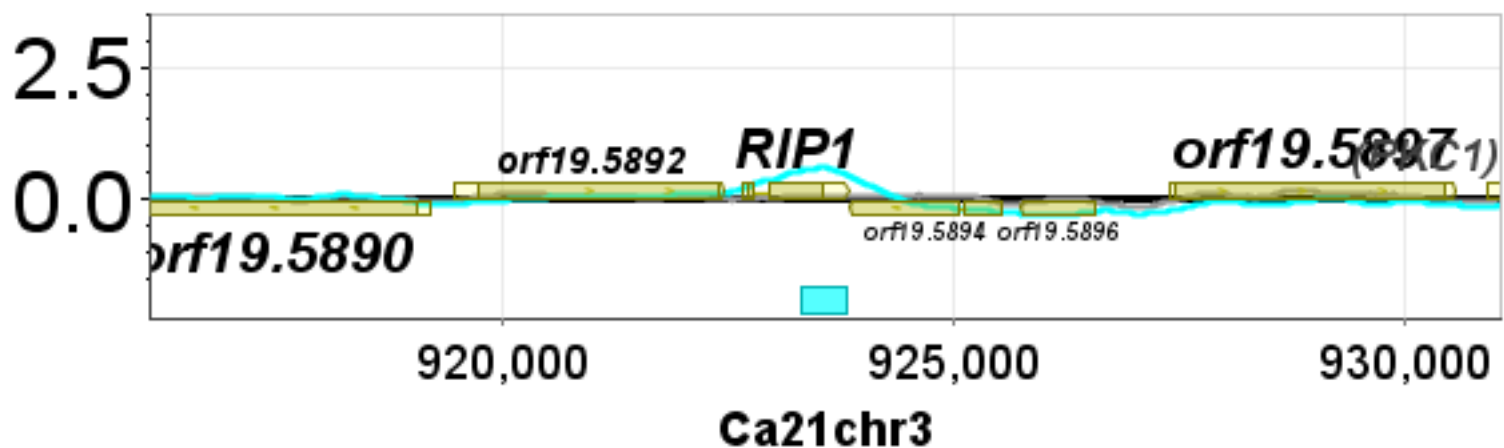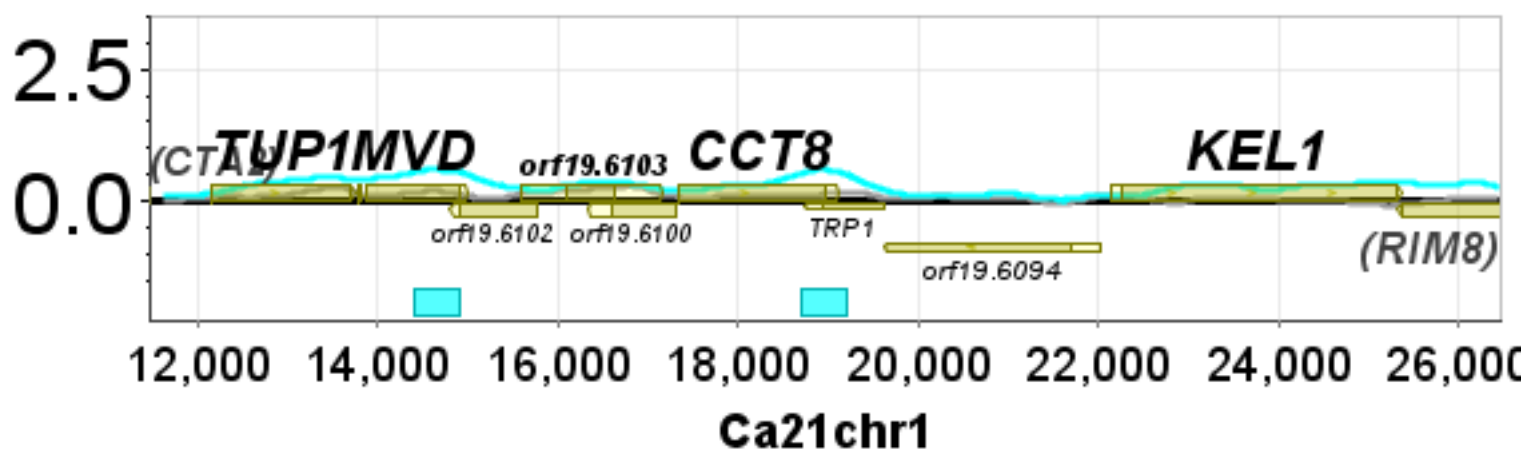

[0.59] Ca21chr1:1400554-1415553 [+] [RPS23A, ANT1, orf19.6255, orf19.6252, orf19.6250]

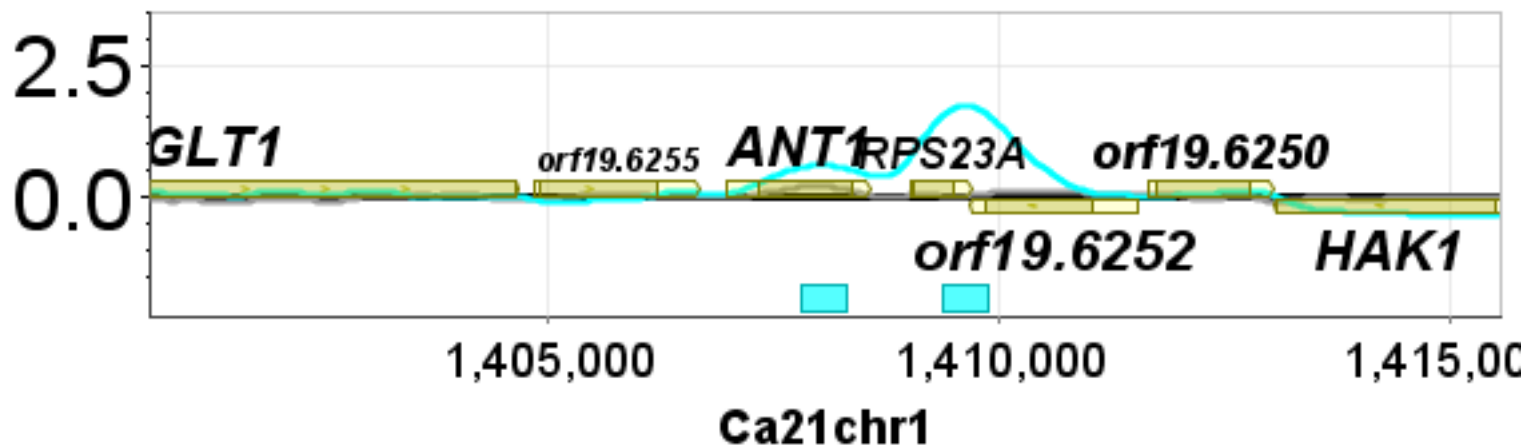

[0.59] Ca21chrR:190519-205518 [+] [GSL2, orf19.3268, orf19.3267, orf19.3266, orf19.3265.1]

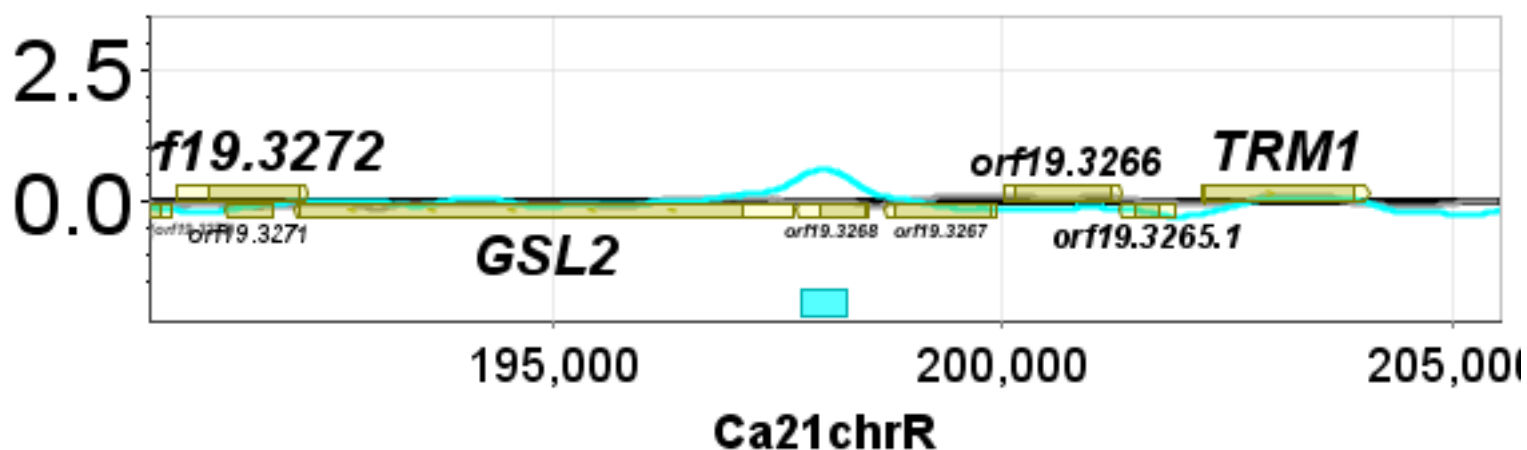

[0.58] Ca21chr5:583820-598819 [+] [MNN1, orf19.4278, orf19.4280, RAD9, orf19.4281]

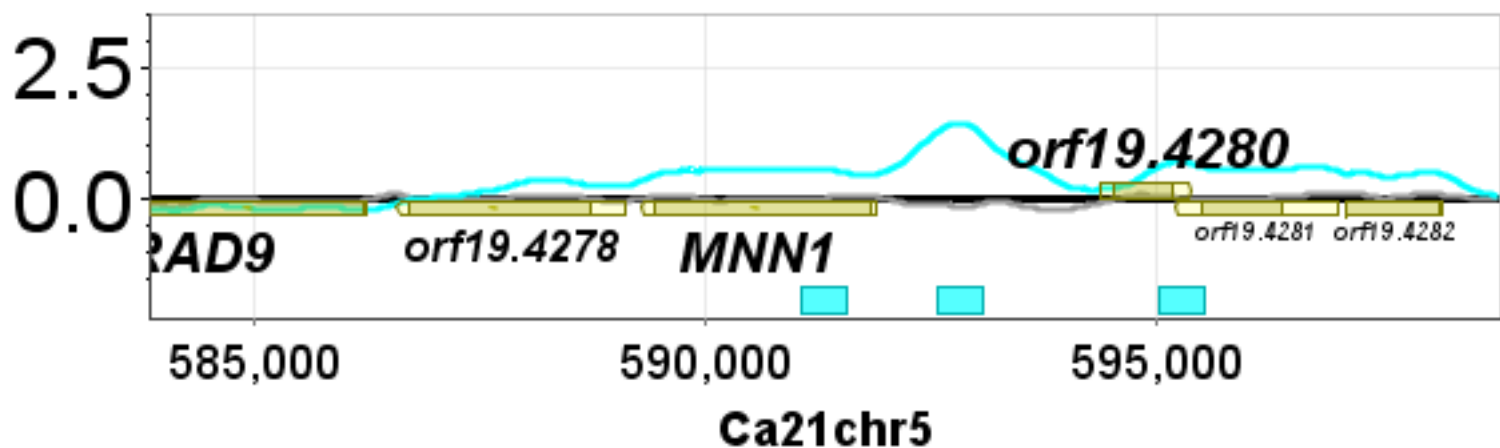

[0.58] Ca21chr7:356284-371283 [+] [orf19.6556, ntar\_1094, ntar\_1093, orf19.6557, orf19.6558]

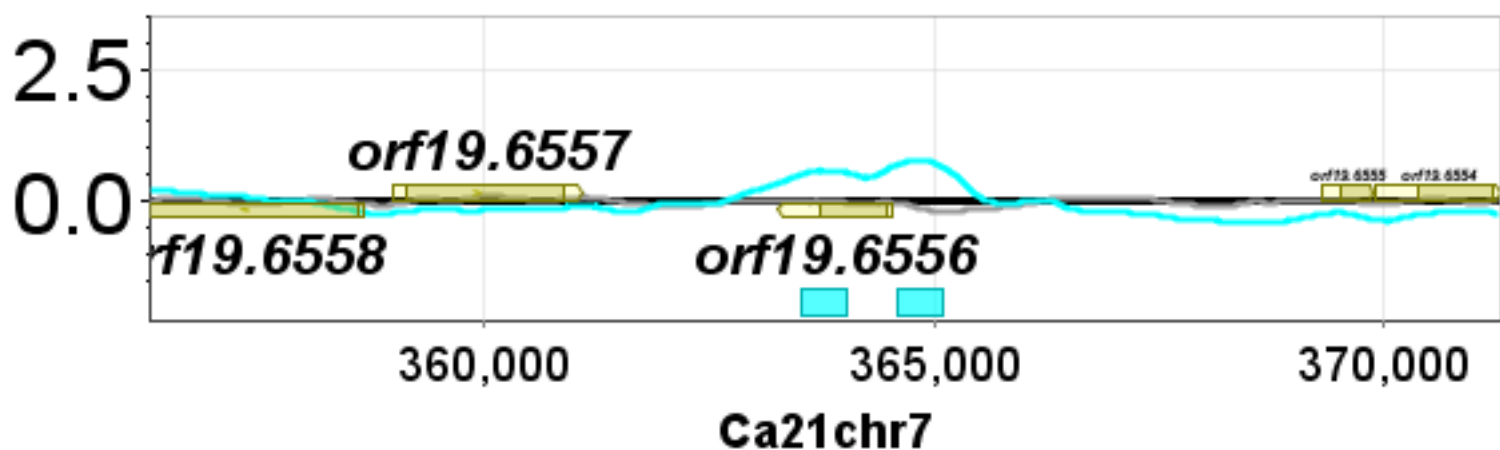

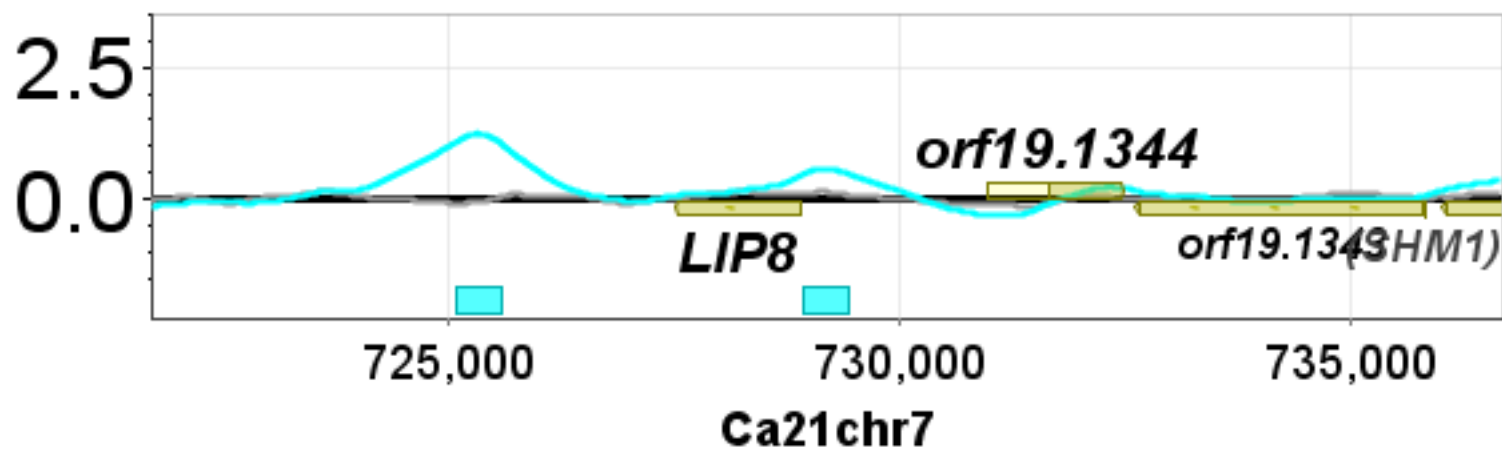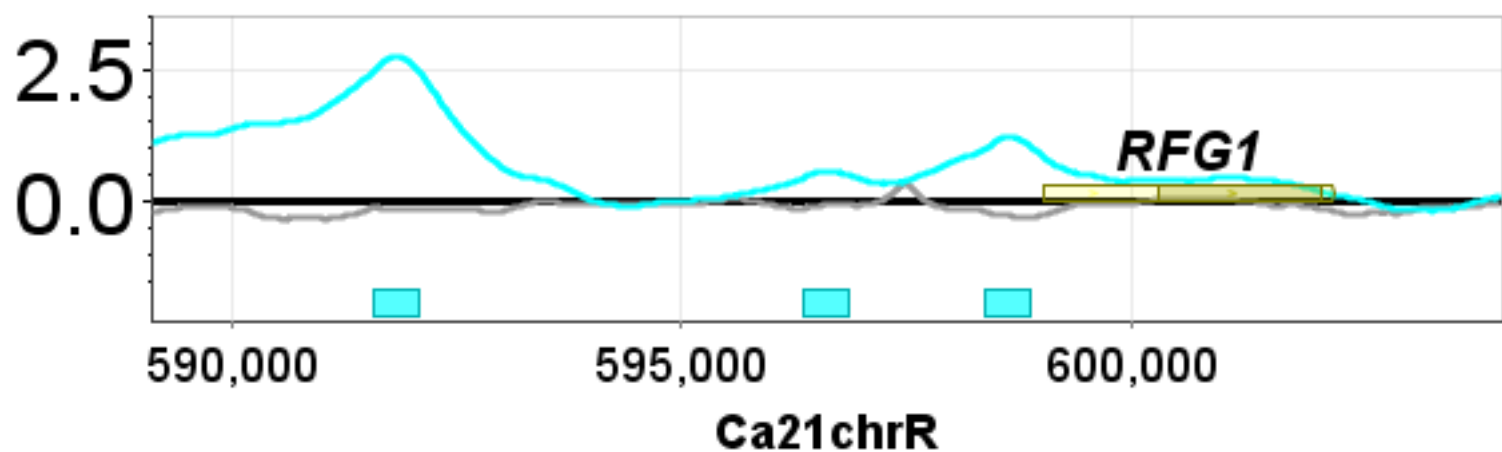

Supplement: NIHMS508843-supplement-Supp_File_S6.pdf [file NIHMS508843-supplement-Supp_File_S6.pdf]
